# Supplementary material
Source: MDPI journal article supplement (https://www.mdpi.com/2304-6740/5/3/51)

# checkCIF/PLATON report

You have not supplied any structure factors. As a result the full set of tests cannot be run.

THIS REPORT IS FOR GUIDANCE ONLY. IF USED AS PART OF A REVIEW PROCEDURE FOR PUBLICATION, IT SHOULD NOT REPLACE THE EXPERTISE OF AN EXPERIENCED CRYSTALLOGRAPHIC REFEREE.

No syntax errors found.      CIF dictionary      Interpreting this report

## Datablock: ld15

---

|                                                               |                        |                                  |
|---------------------------------------------------------------|------------------------|----------------------------------|
| Bond precision:                                               | C-C = 0.0106 A         | Wavelength=0.71073               |
| Cell:                                                         | a=20.6177(3)           | b=20.6177(3)      c=11.7467(3)   |
|                                                               | alpha=90               | beta=90      gamma=90            |
| Temperature:                                                  | 123 K                  |                                  |
|                                                               | Calculated             | Reported                         |
| Volume                                                        | 4993.40(19)            | 4993.40(16)                      |
| Space group                                                   | P -4 n 2               | P-4n2                            |
| Hall group                                                    | P -4 -2n               | ?                                |
| Moiety formula                                                | C16 H16 Cs Fe N8 O8 S2 | ?                                |
| Sum formula                                                   | C16 H16 Cs Fe N8 O8 S2 | C16 H16 Cs Fe N8 O8 S2           |
| Mr                                                            | 701.25                 | 701.25                           |
| Dx,g cm-3                                                     | 1.866                  | 1.866                            |
| Z                                                             | 8                      | 8                                |
| Mu (mm-1)                                                     | 2.266                  | 2.266                            |
| F000                                                          | 2760.0                 | 2760.0                           |
| F000'                                                         | 2762.77                |                                  |
| h,k,lmax                                                      | 32,32,18               | 32,32,18                         |
| Nref                                                          | 10093[ 5418]           | 10084                            |
| Tmin,Tmax                                                     | 0.672,0.762            | 0.660,0.773                      |
| Tmin'                                                         | 0.629                  |                                  |
| Correction method= # Reported T Limits: Tmin=0.660 Tmax=0.773 |                        |                                  |
| AbsCorr = MULTI-SCAN                                          |                        |                                  |
| Data completeness=                                            | 1.86/1.00              | Theta(max)= 33.870               |
| R(reflections)=                                               | 0.0747( 8551)          | wR2(reflections)= 0.2314( 10084) |
| S =                                                           | 1.064                  | Npar= 331                        |

---

The following ALERTS were generated. Each ALERT has the format

**test-name\_ALERT\_alert-type\_alert-level.**

Click on the hyperlinks for more details of the test.

---

**Alert level B**

PLAT420\_ALERT\_2\_B D-H Without Acceptor      07      --      H7A      ...      Please Check

---

**Alert level C**

DIFMN02\_ALERT\_2\_C The minimum difference density is < -0.1\*ZMAX\*0.75

  \_refine\_diff\_density\_min given =      -4.962

  Test value =      -4.125

DIFMN03\_ALERT\_1\_C The minimum difference density is < -0.1\*ZMAX\*0.75

  The relevant atom site should be identified.

|                        |                                                  |              |
|------------------------|--------------------------------------------------|--------------|
| PLAT098_ALERT_2_C      | Large Reported Min. (Negative) Residual Density  | -4.96 eA-3   |
| PLAT213_ALERT_2_C      | Atom O8 has ADP max/min Ratio .....              | 3.6 prolat   |
| PLAT220_ALERT_2_C      | Non-Solvent Resd 1 Cs Ueq(max)/Ueq(min) Range    | 5.2 Ratio    |
| PLAT220_ALERT_2_C      | Non-Solvent Resd 1 O Ueq(max)/Ueq(min) Range     | 5.8 Ratio    |
| PLAT222_ALERT_3_C      | Non-Solvent Resd 1 H Uiso(max)/Uiso(min) Range   | 6.3 Ratio    |
| PLAT242_ALERT_2_C      | Low 'MainMol' Ueq as Compared to Neighbors of    | Cs1 Check    |
| PLAT242_ALERT_2_C      | Low 'MainMol' Ueq as Compared to Neighbors of    | O3 Check     |
| PLAT342_ALERT_3_C      | Low Bond Precision on C-C Bonds .....            | 0.01057 Ang. |
| PLAT415_ALERT_2_C      | Short Inter D-H..H-X H9A .. H15 ..               | 2.10 Ang.    |
| PLAT601_ALERT_2_C      | Structure Contains Solvent Accessible VOIDS of . | 77 Ang3      |
| PLAT790_ALERT_4_C      | Centre of Gravity not Within Unit Cell: Resd. #  | 1 Note       |
| C16 H16 Cs Fe N8 O8 S2 |                                                  |              |

---

**Alert level G**

|                   |                                                  |             |
|-------------------|--------------------------------------------------|-------------|
| PLAT003_ALERT_2_G | Number of Uiso or Uij Restrained non-H Atoms ... | 2 Report    |
| PLAT005_ALERT_5_G | No Embedded Refinement Details found in the CIF  | Please Do ! |
| PLAT007_ALERT_5_G | Number of Unrefined Donor-H Atoms .....          | 10 Report   |
| PLAT072_ALERT_2_G | SHELXL First Parameter in WGHT Unusually Large   | 0.13 Report |
| PLAT083_ALERT_2_G | SHELXL Second Parameter in WGHT Unusually Large  | 33.24 Why ? |
| PLAT093_ALERT_1_G | No s.u.'s on H-positions, Refinement Reported as | mixed Check |
| PLAT152_ALERT_1_G | The Supplied and Calc. Volume s.u. Differ by ... | 3 Units     |
| PLAT300_ALERT_4_G | Atom Site Occupancy of *Cs2 is Constrained at    | 0.5 Check   |
| PLAT300_ALERT_4_G | Atom Site Occupancy of *H8A is Constrained at    | 0.5 Check   |
| PLAT300_ALERT_4_G | Atom Site Occupancy of *H8B is Constrained at    | 0.5 Check   |
| PLAT300_ALERT_4_G | Atom Site Occupancy of *H9A is Constrained at    | 0.5 Check   |
| PLAT300_ALERT_4_G | Atom Site Occupancy of *H9B is Constrained at    | 0.5 Check   |
| PLAT301_ALERT_3_G | Main Residue Disorder ..... Percentage =         | 1 Note      |
| PLAT343_ALERT_2_G | Unusual Angle Range in Main Residue for          | C16 Check   |
| PLAT432_ALERT_2_G | Short Inter X...Y Contact O4 .. C15 ..           | 2.91 Ang.   |
| PLAT764_ALERT_4_G | Overcomplete CIF Bond List Detected (Rep/Expd) . | 1.52 Ratio  |
| PLAT774_ALERT_1_G | Suspect X-Y Bond in CIF: FE1 -- CS1 ..           | 4.30 Ang.   |
| PLAT774_ALERT_1_G | Suspect X-Y Bond in CIF: S2 -- CS2 ..            | 4.07 Ang.   |
| PLAT774_ALERT_1_G | Suspect X-Y Bond in CIF: CS2 -- S2 ..            | 4.07 Ang.   |
| PLAT774_ALERT_1_G | Suspect X-Y Bond in CIF: CS2 -- CS2 ..           | 4.37 Ang.   |
| PLAT774_ALERT_1_G | Suspect X-Y Bond in CIF: CS2 -- CS2 ..           | 4.37 Ang.   |
| PLAT774_ALERT_1_G | Suspect X-Y Bond in CIF: CS2 -- CS2 ..           | 5.55 Ang.   |
| PLAT794_ALERT_5_G | Tentative Bond Valency for Fe1 (III) .....       | 4.42 Note   |
| PLAT804_ALERT_5_G | Number of ARU-Code Packing Problem(s) in PLATON  | 104 Info    |
| PLAT860_ALERT_3_G | Number of Least-Squares Restraints .....         | 12 Note     |
| PLAT899_ALERT_4_G | SHELXL97 is Deprecated and Succeeded by SHELXL   | 2014 Note   |

---

0 **ALERT level A** = Most likely a serious problem - resolve or explain

1 **ALERT level B** = A potentially serious problem, consider carefully

13 **ALERT level C** = Check. Ensure it is not caused by an omission or oversight

26 **ALERT level G** = General information/check it is not something unexpected

9 **ALERT type 1** CIF construction/syntax error, inconsistent or missing data

15 ALERT type 2 Indicator that the structure model may be wrong or deficient  
4 ALERT type 3 Indicator that the structure quality may be low  
8 ALERT type 4 Improvement, methodology, query or suggestion  
4 ALERT type 5 Informative message, check

---

It is advisable to attempt to resolve as many as possible of the alerts in all categories. Often the minor alerts point to easily fixed oversights, errors and omissions in your CIF or refinement strategy, so attention to these fine details can be worthwhile. In order to resolve some of the more serious problems it may be necessary to carry out additional measurements or structure refinements. However, the purpose of your study may justify the reported deviations and the more serious of these should normally be commented upon in the discussion or experimental section of a paper or in the "special\_details" fields of the CIF. checkCIF was carefully designed to identify outliers and unusual parameters, but every test has its limitations and alerts that are not important in a particular case may appear. Conversely, the absence of alerts does not guarantee there are no aspects of the results needing attention. It is up to the individual to critically assess their own results and, if necessary, seek expert advice.

### **Publication of your CIF in IUCr journals**

A basic structural check has been run on your CIF. These basic checks will be run on all CIFs submitted for publication in IUCr journals (*Acta Crystallographica*, *Journal of Applied Crystallography*, *Journal of Synchrotron Radiation*); however, if you intend to submit to *Acta Crystallographica Section C* or *E* or *IUCrData*, you should make sure that full publication checks are run on the final version of your CIF prior to submission.

### **Publication of your CIF in other journals**

Please refer to the *Notes for Authors* of the relevant journal for any special instructions relating to CIF submission.

---

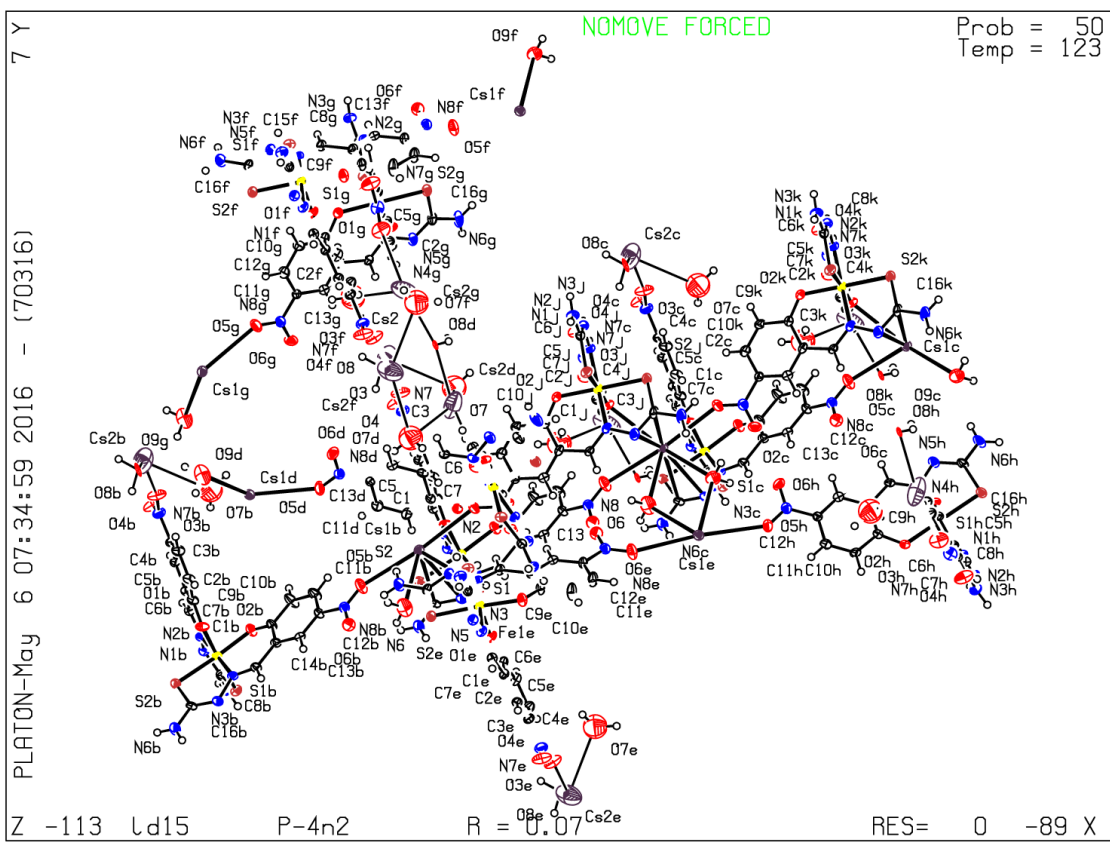

Supplement: s1 [file s1 › inorganics-207671-supplementary/checkcif 6.pdf]
