# Supplementary material
Source: MDPI journal article supplement (https://www.mdpi.com/2304-6740/5/3/51)
Supplement: s1 [file s1]

Archive with 14 entries (13 files):
- inorganics-207671-supplementary/
- inorganics-207671-supplementary/1.cif
- inorganics-207671-supplementary/2.cif
- inorganics-207671-supplementary/3.cif
- inorganics-207671-supplementary/4.cif
- inorganics-207671-supplementary/5.cif
- inorganics-207671-supplementary/6.cif
- inorganics-207671-supplementary/checkcif 1.pdf
- inorganics-207671-supplementary/checkcif 2.pdf
- inorganics-207671-supplementary/checkcif 3.pdf
- inorganics-207671-supplementary/checkcif 4.pdf
- inorganics-207671-supplementary/checkcif 5.pdf
- inorganics-207671-supplementary/checkcif 6.pdf
- inorganics-207671-supplementary/inorganics-207671-supplementary.docx
