# Supplementary material
Source: MDPI journal article supplement (https://www.mdpi.com/2304-6740/5/3/51)
Supplement: s1 [file s1 › inorganics-207671-supplementary/1.cif]

####################################################################### 
# 
# This file contains crystal structure data downloaded from the 
# Cambridge Structural Database (CSD) hosted by the Cambridge 
# Crystallographic Data Centre (CCDC).
# 
# Full information about CCDC data access policies and citation 
# guidelines are available at http://www.ccdc.cam.ac.uk/access/V1 
# 
# Audit and citation data items may have been added by the CCDC. 
# Please retain this information to preserve the provenance of 
# this file and to allow appropriate attribution of the data. 
# 
#######################################################################

data_ws31lt
_audit_block_doi                 10.5517/cc1jp19k
_database_code_depnum_ccdc_archive 'CCDC 1420398'
loop_
_citation_id
_citation_doi
_citation_year
1 10.1039/C5CC08701E 2016
_audit_update_record             
;
2015-08-25 deposited with the CCDC.
2017-07-25 downloaded from the CCDC.
;

_audit_creation_method           SHELXL-97
_chemical_name_systematic        
; 
 ? 
;
_chemical_name_common            '[Fe(3MeO-SalEen)(thsa)]'
_chemical_melting_point          ?
_chemical_formula_moiety         'C20 H24 Fe N5 O3 S'
_chemical_formula_sum            'C20 H24 Fe N5 O3 S'
_chemical_formula_weight         470.35

loop_
_atom_type_symbol
_atom_type_description
_atom_type_scat_dispersion_real
_atom_type_scat_dispersion_imag
_atom_type_scat_source
C C 0.0033 0.0016 'International Tables Vol C Tables 4.2.6.8 and 6.1.1.4'
H H 0.0000 0.0000 'International Tables Vol C Tables 4.2.6.8 and 6.1.1.4'
N N 0.0061 0.0033 'International Tables Vol C Tables 4.2.6.8 and 6.1.1.4'
O O 0.0106 0.0060 'International Tables Vol C Tables 4.2.6.8 and 6.1.1.4'
S S 0.1246 0.1234 'International Tables Vol C Tables 4.2.6.8 and 6.1.1.4'
Fe Fe 0.3463 0.8444 'International Tables Vol C Tables 4.2.6.8 and 6.1.1.4'

_symmetry_cell_setting           Triclinic
_symmetry_space_group_name_H-M   'P -1'

loop_
_symmetry_equiv_pos_as_xyz
'x, y, z'
'-x, -y, -z'

_cell_length_a                   8.3940(17)
_cell_length_b                   9.3500(19)
_cell_length_c                   13.675(3)
_cell_angle_alpha                82.26(3)
_cell_angle_beta                 73.44(3)
_cell_angle_gamma                82.14(3)
_cell_volume                     1013.9(4)
_cell_formula_units_Z            2
_cell_measurement_temperature    100(2)
_cell_measurement_reflns_used    ?
_cell_measurement_theta_min      ?
_cell_measurement_theta_max      ?

_exptl_crystal_description       Block
_exptl_crystal_colour            Black
_exptl_crystal_size_max          0.03
_exptl_crystal_size_mid          0.02
_exptl_crystal_size_min          0.01
_exptl_crystal_density_meas      ?
_exptl_crystal_density_diffrn    1.541
_exptl_crystal_density_method    'not measured'
_exptl_crystal_F_000             490
_exptl_absorpt_coefficient_mu    0.880
_exptl_absorpt_correction_type   Multi-Scan
_exptl_absorpt_correction_T_min  0.9741
_exptl_absorpt_correction_T_max  0.9913
_exptl_absorpt_process_details   'XScale within XDS'

_exptl_special_details           
; 
 ? 
;

_diffrn_ambient_temperature      100(2)
_diffrn_radiation_wavelength     0.71073
_diffrn_radiation_type           synchrotron
_diffrn_radiation_source         'Australian Synchrotron'
_diffrn_radiation_monochromator  'Silicon Double Crystal'
_diffrn_measurement_device_type  'ADSC Quantum 315r CCD'
_diffrn_measurement_method       'Phi Scan'
_diffrn_detector_area_resol_mean ?
_diffrn_standards_number         ?
_diffrn_standards_interval_count ?
_diffrn_standards_interval_time  ?
_diffrn_standards_decay_%        ?
_diffrn_reflns_number            27497
_diffrn_reflns_av_R_equivalents  0.0501
_diffrn_reflns_av_sigmaI/netI    0.0312
_diffrn_reflns_limit_h_min       -11
_diffrn_reflns_limit_h_max       11
_diffrn_reflns_limit_k_min       -13
_diffrn_reflns_limit_k_max       13
_diffrn_reflns_limit_l_min       -19
_diffrn_reflns_limit_l_max       19
_diffrn_reflns_theta_min         1.56
_diffrn_reflns_theta_max         30.07
_reflns_number_total             5929
_reflns_number_gt                5269
_reflns_threshold_expression     >2sigma(I)

_computing_data_collection       'Blu-Ice (McPhillips et al, 2002)'
_computing_cell_refinement       'XDS (Kabsch, 1993)'
_computing_data_reduction        'XDS (Kabsch, 1993)'
_computing_structure_solution    'SHELXS-97 (Sheldrick, 1990)'
_computing_structure_refinement  'SHELXL-97 (Sheldrick, 1997)'
_computing_molecular_graphics    X-SEED
_computing_publication_material  'XCIF V6.12 (BrukerAXS, 2001).'

_refine_special_details          
; 
 Refinement of F^2^ against ALL reflections.  The weighted R-factor wR and 
 goodness of fit S are based on F^2^, conventional R-factors R are based 
 on F, with F set to zero for negative F^2^. The threshold expression of 
 F^2^ > 2sigma(F^2^) is used only for calculating R-factors(gt) etc. and is 
 not relevant to the choice of reflections for refinement.  R-factors based 
 on F^2^ are statistically about twice as large as those based on F, and R- 
 factors based on ALL data will be even larger. 
;

_refine_ls_structure_factor_coef Fsqd
_refine_ls_matrix_type           full
_refine_ls_weighting_scheme      calc
_refine_ls_weighting_details     
'calc w=1/[\s^2^(Fo^2^)+(0.0634P)^2^+0.5359P] where P=(Fo^2^+2Fc^2^)/3'
_atom_sites_solution_primary     direct
_atom_sites_solution_secondary   difmap
_atom_sites_solution_hydrogens   geom
_refine_ls_hydrogen_treatment    mixed
_refine_ls_extinction_method     none
_refine_ls_extinction_coef       ?
_refine_ls_number_reflns         5929
_refine_ls_number_parameters     277
_refine_ls_number_restraints     1
_refine_ls_R_factor_all          0.0464
_refine_ls_R_factor_gt           0.0401
_refine_ls_wR_factor_ref         0.1123
_refine_ls_wR_factor_gt          0.1093
_refine_ls_goodness_of_fit_ref   1.074
_refine_ls_restrained_S_all      1.074
_refine_ls_shift/su_max          0.001
_refine_ls_shift/su_mean         0.000

loop_
_atom_site_label
_atom_site_type_symbol
_atom_site_fract_x
_atom_site_fract_y
_atom_site_fract_z
_atom_site_U_iso_or_equiv
_atom_site_adp_type
_atom_site_occupancy
_atom_site_symmetry_multiplicity
_atom_site_calc_flag
_atom_site_refinement_flags
_atom_site_disorder_assembly
_atom_site_disorder_group
Fe1 Fe 0.25707(3) 0.39795(3) 0.276574(16) 0.01929(8) Uani 1 1 d . . .
S1 S -0.00073(5) 0.51274(5) 0.28508(3) 0.02478(10) Uani 1 1 d . . .
C20 C 0.0061(2) 0.49708(18) 0.15805(12) 0.0207(3) Uani 1 1 d . . .
O1 O 0.36397(15) 0.56980(13) 0.23726(9) 0.0237(2) Uani 1 1 d . . .
N4 N -0.13149(17) 0.54996(17) 0.12753(11) 0.0247(3) Uani 1 1 d . . .
H4A H -0.1324 0.5462 0.0637 0.030 Uiso 1 1 calc R . .
H4B H -0.2204 0.5883 0.1714 0.030 Uiso 1 1 calc R . .
C12 C 0.1165(3) -0.0451(2) 0.28804(15) 0.0330(4) Uani 1 1 d . . .
H12A H 0.1480 -0.0956 0.3484 0.049 Uiso 1 1 calc R . .
H12B H 0.1475 -0.1095 0.2331 0.049 Uiso 1 1 calc R . .
H12C H -0.0044 -0.0177 0.3060 0.049 Uiso 1 1 calc R . .
N5 N 0.13721(16) 0.44052(15) 0.09199(10) 0.0199(3) Uani 1 1 d . . .
C19 C 0.41090(19) 0.35911(17) 0.06389(12) 0.0197(3) Uani 1 1 d . . .
H19 H 0.4091 0.3735 -0.0059 0.024 Uiso 1 1 calc R . .
N3 N 0.27355(16) 0.39598(15) 0.13216(10) 0.0187(2) Uani 1 1 d . . .
O3 O 0.46453(15) 0.28566(14) 0.27094(9) 0.0241(2) Uani 1 1 d . . .
O2 O 0.54085(17) 0.77840(15) 0.14664(10) 0.0299(3) Uani 1 1 d . . .
N1 N 0.15079(18) 0.20568(17) 0.32282(11) 0.0243(3) Uani 1 1 d D . .
N2 N 0.22800(18) 0.40383(17) 0.42046(10) 0.0239(3) Uani 1 1 d . . .
C18 C 0.56627(19) 0.29801(18) 0.08544(12) 0.0207(3) Uani 1 1 d . . .
C17 C 0.7010(2) 0.26515(19) 0.00034(13) 0.0246(3) Uani 1 1 d . . .
H17 H 0.6874 0.2890 -0.0668 0.030 Uiso 1 1 calc R . .
C13 C 0.58524(19) 0.26370(18) 0.18631(13) 0.0221(3) Uani 1 1 d . . .
C8 C 0.2833(2) 0.4958(2) 0.46188(13) 0.0265(3) Uani 1 1 d . . .
H8 H 0.2640 0.4834 0.5343 0.032 Uiso 1 1 calc R . .
C11 C 0.2076(2) 0.0911(2) 0.25155(13) 0.0271(3) Uani 1 1 d . . .
H11A H 0.3288 0.0635 0.2421 0.033 Uiso 1 1 calc R . .
H11B H 0.1913 0.1314 0.1839 0.033 Uiso 1 1 calc R . .
C10 C 0.1743(2) 0.1582(2) 0.42587(13) 0.0284(3) Uani 1 1 d . . .
H10A H 0.2910 0.1159 0.4199 0.034 Uiso 1 1 calc R . .
H10B H 0.0991 0.0832 0.4614 0.034 Uiso 1 1 calc R . .
C1 C 0.4100(2) 0.64294(19) 0.29803(13) 0.0231(3) Uani 1 1 d . . .
C16 C 0.8526(2) 0.1988(2) 0.01246(15) 0.0292(4) Uani 1 1 d . . .
H16 H 0.9423 0.1763 -0.0456 0.035 Uiso 1 1 calc R . .
C2 C 0.5062(2) 0.76135(19) 0.25070(14) 0.0254(3) Uani 1 1 d . . .
C14 C 0.7426(2) 0.1976(2) 0.19636(14) 0.0269(3) Uani 1 1 d . . .
H14 H 0.7595 0.1749 0.2627 0.032 Uiso 1 1 calc R . .
C7 C 0.3720(2) 0.6154(2) 0.40636(13) 0.0257(3) Uani 1 1 d . . .
C6 C 0.4210(3) 0.7084(2) 0.46428(15) 0.0334(4) Uani 1 1 d . . .
H6 H 0.3919 0.6911 0.5370 0.040 Uiso 1 1 calc R . .
C9 C 0.1349(2) 0.2886(2) 0.48603(13) 0.0287(4) Uani 1 1 d . . .
H9A H 0.0135 0.3198 0.5038 0.034 Uiso 1 1 calc R . .
H9B H 0.1695 0.2649 0.5502 0.034 Uiso 1 1 calc R . .
C4 C 0.5551(2) 0.8487(2) 0.30870(16) 0.0321(4) Uani 1 1 d . . .
H4 H 0.6194 0.9264 0.2758 0.039 Uiso 1 1 calc R . .
C15 C 0.8721(2) 0.1653(2) 0.11110(16) 0.0297(4) Uani 1 1 d . . .
H15 H 0.9761 0.1195 0.1200 0.036 Uiso 1 1 calc R . .
C5 C 0.5096(3) 0.8226(2) 0.41642(17) 0.0376(4) Uani 1 1 d . . .
H5 H 0.5405 0.8846 0.4561 0.045 Uiso 1 1 calc R . .
C3 C 0.6448(3) 0.8891(2) 0.09292(17) 0.0358(4) Uani 1 1 d . . .
H3A H 0.5887 0.9842 0.1124 0.054 Uiso 1 1 calc R . .
H3B H 0.6653 0.8869 0.0189 0.054 Uiso 1 1 calc R . .
H3C H 0.7514 0.8721 0.1107 0.054 Uiso 1 1 calc R . .
H1A H 0.0352(14) 0.228(3) 0.332(2) 0.042(7) Uiso 1 1 d D . .

loop_
_atom_site_aniso_label
_atom_site_aniso_U_11
_atom_site_aniso_U_22
_atom_site_aniso_U_33
_atom_site_aniso_U_23
_atom_site_aniso_U_13
_atom_site_aniso_U_12
Fe1 0.01960(12) 0.02072(13) 0.01663(12) 0.00020(8) -0.00496(8) -0.00091(8)
S1 0.02268(19) 0.0313(2) 0.01746(17) -0.00255(14) -0.00375(14) 0.00369(15)
C20 0.0202(7) 0.0202(8) 0.0198(7) 0.0001(5) -0.0036(5) -0.0014(5)
O1 0.0282(6) 0.0220(6) 0.0214(5) -0.0018(4) -0.0066(4) -0.0043(4)
N4 0.0196(6) 0.0314(8) 0.0208(6) -0.0020(5) -0.0047(5) 0.0035(5)
C12 0.0359(10) 0.0254(9) 0.0377(10) 0.0032(7) -0.0116(8) -0.0066(7)
N5 0.0178(6) 0.0224(7) 0.0189(6) -0.0009(5) -0.0054(5) 0.0004(5)
C19 0.0192(6) 0.0185(7) 0.0195(6) 0.0010(5) -0.0036(5) -0.0016(5)
N3 0.0186(6) 0.0183(6) 0.0186(6) 0.0003(4) -0.0053(5) -0.0013(4)
O3 0.0208(5) 0.0271(6) 0.0236(5) 0.0010(4) -0.0077(4) -0.0001(4)
O2 0.0293(6) 0.0275(7) 0.0300(6) -0.0040(5) -0.0011(5) -0.0076(5)
N1 0.0234(6) 0.0256(7) 0.0220(6) 0.0016(5) -0.0049(5) -0.0027(5)
N2 0.0248(6) 0.0271(8) 0.0174(6) -0.0011(5) -0.0044(5) 0.0013(5)
C18 0.0170(6) 0.0187(7) 0.0245(7) 0.0007(5) -0.0043(5) -0.0014(5)
C17 0.0206(7) 0.0227(8) 0.0272(8) 0.0011(6) -0.0030(6) -0.0020(6)
C13 0.0198(7) 0.0197(7) 0.0272(7) 0.0010(6) -0.0078(6) -0.0036(5)
C8 0.0271(8) 0.0308(9) 0.0202(7) -0.0040(6) -0.0073(6) 0.0049(6)
C11 0.0302(8) 0.0260(9) 0.0251(7) 0.0000(6) -0.0081(6) -0.0038(6)
C10 0.0315(8) 0.0298(9) 0.0214(7) 0.0044(6) -0.0060(6) -0.0038(7)
C1 0.0213(7) 0.0226(8) 0.0258(7) -0.0041(6) -0.0082(6) 0.0017(6)
C16 0.0175(7) 0.0287(9) 0.0372(9) -0.0002(7) -0.0024(6) -0.0020(6)
C2 0.0227(7) 0.0219(8) 0.0320(8) -0.0041(6) -0.0089(6) 0.0009(6)
C14 0.0225(7) 0.0265(9) 0.0332(8) 0.0015(6) -0.0122(6) -0.0022(6)
C7 0.0270(8) 0.0254(9) 0.0264(8) -0.0052(6) -0.0119(6) 0.0037(6)
C6 0.0426(10) 0.0314(10) 0.0318(9) -0.0081(7) -0.0206(8) 0.0039(8)
C9 0.0300(8) 0.0339(10) 0.0186(7) 0.0021(6) -0.0030(6) -0.0034(7)
C4 0.0328(9) 0.0249(9) 0.0433(10) -0.0050(7) -0.0183(8) -0.0007(7)
C15 0.0175(7) 0.0284(9) 0.0424(10) 0.0008(7) -0.0099(7) -0.0004(6)
C5 0.0475(11) 0.0310(10) 0.0441(11) -0.0105(8) -0.0273(9) 0.0010(8)
C3 0.0332(9) 0.0266(10) 0.0428(10) -0.0048(8) 0.0008(8) -0.0085(7)

_geom_special_details            
; 
 All esds (except the esd in the dihedral angle between two l.s. planes) 
 are estimated using the full covariance matrix.  The cell esds are taken 
 into account individually in the estimation of esds in distances, angles 
 and torsion angles; correlations between esds in cell parameters are only 
 used when they are defined by crystal symmetry.  An approximate (isotropic) 
 treatment of cell esds is used for estimating esds involving l.s. planes. 
;

loop_
_geom_bond_atom_site_label_1
_geom_bond_atom_site_label_2
_geom_bond_distance
_geom_bond_site_symmetry_2
_geom_bond_publ_flag
Fe1 O1 1.8875(14) . ?
Fe1 O3 1.8937(13) . ?
Fe1 N2 1.9198(14) . ?
Fe1 N3 1.9424(14) . ?
Fe1 N1 2.0588(17) . ?
Fe1 S1 2.2590(8) . ?
S1 C20 1.7470(17) . ?
C20 N5 1.308(2) . ?
C20 N4 1.347(2) . ?
O1 C1 1.310(2) . ?
N4 H4A 0.8800 . ?
N4 H4B 0.8800 . ?
C12 C11 1.527(3) . ?
C12 H12A 0.9800 . ?
C12 H12B 0.9800 . ?
C12 H12C 0.9800 . ?
N5 N3 1.3969(18) . ?
C19 N3 1.298(2) . ?
C19 C18 1.444(2) . ?
C19 H19 0.9500 . ?
O3 C13 1.322(2) . ?
O2 C2 1.361(2) . ?
O2 C3 1.432(2) . ?
N1 C10 1.479(2) . ?
N1 C11 1.484(2) . ?
N1 H1A 0.940(10) . ?
N2 C8 1.291(2) . ?
N2 C9 1.465(2) . ?
C18 C17 1.406(2) . ?
C18 C13 1.422(2) . ?
C17 C16 1.382(2) . ?
C17 H17 0.9500 . ?
C13 C14 1.415(2) . ?
C8 C7 1.434(3) . ?
C8 H8 0.9500 . ?
C11 H11A 0.9900 . ?
C11 H11B 0.9900 . ?
C10 C9 1.509(3) . ?
C10 H10A 0.9900 . ?
C10 H10B 0.9900 . ?
C1 C7 1.419(2) . ?
C1 C2 1.432(3) . ?
C16 C15 1.394(3) . ?
C16 H16 0.9500 . ?
C2 C4 1.384(3) . ?
C14 C15 1.384(3) . ?
C14 H14 0.9500 . ?
C7 C6 1.422(3) . ?
C6 C5 1.369(3) . ?
C6 H6 0.9500 . ?
C9 H9A 0.9900 . ?
C9 H9B 0.9900 . ?
C4 C5 1.408(3) . ?
C4 H4 0.9500 . ?
C15 H15 0.9500 . ?
C5 H5 0.9500 . ?
C3 H3A 0.9800 . ?
C3 H3B 0.9800 . ?
C3 H3C 0.9800 . ?

loop_
_geom_angle_atom_site_label_1
_geom_angle_atom_site_label_2
_geom_angle_atom_site_label_3
_geom_angle
_geom_angle_site_symmetry_1
_geom_angle_site_symmetry_3
_geom_angle_publ_flag
O1 Fe1 O3 90.90(6) . . ?
O1 Fe1 N2 94.32(7) . . ?
O3 Fe1 N2 88.15(7) . . ?
O1 Fe1 N3 86.37(6) . . ?
O3 Fe1 N3 94.92(6) . . ?
N2 Fe1 N3 176.84(6) . . ?
O1 Fe1 N1 176.91(5) . . ?
O3 Fe1 N1 86.35(6) . . ?
N2 Fe1 N1 84.18(7) . . ?
N3 Fe1 N1 95.27(6) . . ?
O1 Fe1 S1 94.23(5) . . ?
O3 Fe1 S1 174.80(4) . . ?
N2 Fe1 S1 92.28(5) . . ?
N3 Fe1 S1 84.59(5) . . ?
N1 Fe1 S1 88.53(5) . . ?
C20 S1 Fe1 95.66(6) . . ?
N5 C20 N4 119.28(14) . . ?
N5 C20 S1 123.62(12) . . ?
N4 C20 S1 117.08(12) . . ?
C1 O1 Fe1 125.94(11) . . ?
C20 N4 H4A 120.0 . . ?
C20 N4 H4B 120.0 . . ?
H4A N4 H4B 120.0 . . ?
C11 C12 H12A 109.5 . . ?
C11 C12 H12B 109.5 . . ?
H12A C12 H12B 109.5 . . ?
C11 C12 H12C 109.5 . . ?
H12A C12 H12C 109.5 . . ?
H12B C12 H12C 109.5 . . ?
C20 N5 N3 113.47(13) . . ?
N3 C19 C18 125.27(14) . . ?
N3 C19 H19 117.4 . . ?
C18 C19 H19 117.4 . . ?
C19 N3 N5 113.86(13) . . ?
C19 N3 Fe1 123.97(11) . . ?
N5 N3 Fe1 122.12(10) . . ?
C13 O3 Fe1 125.24(10) . . ?
C2 O2 C3 117.37(15) . . ?
C10 N1 C11 113.33(14) . . ?
C10 N1 Fe1 105.57(12) . . ?
C11 N1 Fe1 116.79(11) . . ?
C10 N1 H1A 106.7(16) . . ?
C11 N1 H1A 107.1(16) . . ?
Fe1 N1 H1A 106.7(17) . . ?
C8 N2 C9 119.38(15) . . ?
C8 N2 Fe1 126.56(13) . . ?
C9 N2 Fe1 114.06(12) . . ?
C17 C18 C13 119.93(14) . . ?
C17 C18 C19 116.42(15) . . ?
C13 C18 C19 123.56(15) . . ?
C16 C17 C18 121.28(16) . . ?
C16 C17 H17 119.4 . . ?
C18 C17 H17 119.4 . . ?
O3 C13 C14 118.07(15) . . ?
O3 C13 C18 124.33(14) . . ?
C14 C13 C18 117.57(15) . . ?
N2 C8 C7 124.65(15) . . ?
N2 C8 H8 117.7 . . ?
C7 C8 H8 117.7 . . ?
N1 C11 C12 113.90(15) . . ?
N1 C11 H11A 108.8 . . ?
C12 C11 H11A 108.8 . . ?
N1 C11 H11B 108.8 . . ?
C12 C11 H11B 108.8 . . ?
H11A C11 H11B 107.7 . . ?
N1 C10 C9 108.30(15) . . ?
N1 C10 H10A 110.0 . . ?
C9 C10 H10A 110.0 . . ?
N1 C10 H10B 110.0 . . ?
C9 C10 H10B 110.0 . . ?
H10A C10 H10B 108.4 . . ?
O1 C1 C7 125.65(16) . . ?
O1 C1 C2 116.94(15) . . ?
C7 C1 C2 117.41(16) . . ?
C17 C16 C15 119.07(17) . . ?
C17 C16 H16 120.5 . . ?
C15 C16 H16 120.5 . . ?
O2 C2 C4 124.92(17) . . ?
O2 C2 C1 113.82(15) . . ?
C4 C2 C1 121.26(17) . . ?
C15 C14 C13 121.11(16) . . ?
C15 C14 H14 119.4 . . ?
C13 C14 H14 119.4 . . ?
C1 C7 C6 120.15(18) . . ?
C1 C7 C8 122.48(16) . . ?
C6 C7 C8 117.37(16) . . ?
C5 C6 C7 120.68(18) . . ?
C5 C6 H6 119.7 . . ?
C7 C6 H6 119.7 . . ?
N2 C9 C10 106.81(14) . . ?
N2 C9 H9A 110.4 . . ?
C10 C9 H9A 110.4 . . ?
N2 C9 H9B 110.4 . . ?
C10 C9 H9B 110.4 . . ?
H9A C9 H9B 108.6 . . ?
C2 C4 C5 120.10(19) . . ?
C2 C4 H4 120.0 . . ?
C5 C4 H4 120.0 . . ?
C14 C15 C16 121.04(16) . . ?
C14 C15 H15 119.5 . . ?
C16 C15 H15 119.5 . . ?
C6 C5 C4 120.31(18) . . ?
C6 C5 H5 119.8 . . ?
C4 C5 H5 119.8 . . ?
O2 C3 H3A 109.5 . . ?
O2 C3 H3B 109.5 . . ?
H3A C3 H3B 109.5 . . ?
O2 C3 H3C 109.5 . . ?
H3A C3 H3C 109.5 . . ?
H3B C3 H3C 109.5 . . ?

_diffrn_measured_fraction_theta_max 0.994
_diffrn_reflns_theta_full        27.50
_diffrn_measured_fraction_theta_full 0.996
_refine_diff_density_max         0.920
_refine_diff_density_min         -0.891
_refine_diff_density_rms         0.078
_exptl_crystal_recrystallization_method 'Slow Evaporation'
_exptl_crystal_preparation       'Magnetic properties'
