# Supplementary material
Source: MDPI journal article supplement (https://www.mdpi.com/2304-6740/5/3/51)
Supplement: s1 [file s1 › inorganics-207671-supplementary/2.cif]

 
data_ld41a_a
 
_audit_creation_method            SHELXL-2013
_chemical_name_systematic
;
 ?
;
_chemical_name_common             '[Fe(3-MeOSalEen)(3-EtOthsa)]'
_chemical_melting_point           ?
_chemical_formula_moiety          ?
_chemical_formula_sum
 'C22 H28 Fe N5 O4 S' 
_chemical_formula_weight          514.40

loop_
 _atom_type_symbol
 _atom_type_description
 _atom_type_scat_dispersion_real
 _atom_type_scat_dispersion_imag
 _atom_type_scat_source
 'C'  'C'   0.0033   0.0016
 'International Tables Vol C Tables 4.2.6.8 and 6.1.1.4'
 'H'  'H'   0.0000   0.0000
 'International Tables Vol C Tables 4.2.6.8 and 6.1.1.4'
 'N'  'N'   0.0061   0.0033
 'International Tables Vol C Tables 4.2.6.8 and 6.1.1.4'
 'O'  'O'   0.0106   0.0060
 'International Tables Vol C Tables 4.2.6.8 and 6.1.1.4'
 'S'  'S'   0.1246   0.1234
 'International Tables Vol C Tables 4.2.6.8 and 6.1.1.4'
 'Fe'  'Fe'   0.3463   0.8444
 'International Tables Vol C Tables 4.2.6.8 and 6.1.1.4'
 
_space_group_crystal_system       monoclinic
_space_group_IT_number            14
_space_group_name_H-M_alt         'P 21/c'
_space_group_name_Hall            '-P 2ybc'
 
_shelx_space_group_comment
;
The symmetry employed for this shelxl refinement is uniquely defined
by the following loop, which should always be used as a source of
symmetry information in preference to the above space-group names.
They are only intended as comments.
;
 
loop_
 _space_group_symop_operation_xyz
 'x, y, z'
 '-x, y+1/2, -z+1/2'
 '-x, -y, -z'
 'x, -y-1/2, z-1/2'
 
_cell_length_a                    14.122(3)
_cell_length_b                    13.889(3)
_cell_length_c                    13.470(3)
_cell_angle_alpha                 90
_cell_angle_beta                  118.40(3)
_cell_angle_gamma                 90
_cell_volume                      2324.1(10)
_cell_formula_units_Z             4
_cell_measurement_temperature     100(2)
_cell_measurement_reflns_used     6513 
_cell_measurement_theta_min       0.797 
_cell_measurement_theta_max       31.770 
 
_exptl_crystal_description        'Block' 
_exptl_crystal_colour             'Dark green' 
_exptl_crystal_density_meas       ? 
_exptl_crystal_density_method     ?              
_exptl_crystal_density_diffrn     1.470          
_exptl_crystal_F_000              1076
_exptl_transmission_factor_min    ?                                             
_exptl_transmission_factor_max    ?                                             
_exptl_crystal_size_max           0.030
_exptl_crystal_size_mid           0.020
_exptl_crystal_size_min           0.010
_exptl_absorpt_coefficient_mu     0.778
_shelx_estimated_absorpt_T_min    0.977
_shelx_estimated_absorpt_T_max    0.992
_exptl_absorpt_correction_type    Multi-Scan 
_exptl_absorpt_correction_T_min   0.9770 
_exptl_absorpt_correction_T_max   0.9923 
_exptl_absorpt_process_details    'XScale within XDS' 
 
_exptl_special_details
;
 ?
;
 
_diffrn_ambient_temperature       100(2)
_diffrn_radiation_wavelength      0.71073
_diffrn_radiation_type            Synchrotron 
_diffrn_source                    'Australian Synchrotron'                       
_diffrn_measurement_device_type   'ADSC Quantum 210r' 
_diffrn_measurement_method        'Phi Scan' 
_diffrn_detector_area_resol_mean  ? 
_diffrn_reflns_number             23856
_diffrn_reflns_av_unetI/netI      0.0272
_diffrn_reflns_av_R_equivalents   0.0369
_diffrn_reflns_limit_h_min        -17
_diffrn_reflns_limit_h_max        18
_diffrn_reflns_limit_k_min        -18
_diffrn_reflns_limit_k_max        18
_diffrn_reflns_limit_l_min        -18
_diffrn_reflns_limit_l_max        17
_diffrn_reflns_theta_min          2.261
_diffrn_reflns_theta_max          31.767
_diffrn_reflns_theta_full         27.500
_diffrn_measured_fraction_theta_max   0.797
_diffrn_measured_fraction_theta_full  0.953
_diffrn_reflns_Laue_measured_fraction_max    0.797
_diffrn_reflns_Laue_measured_fraction_full   0.953
_diffrn_reflns_point_group_measured_fraction_max   0.797
_diffrn_reflns_point_group_measured_fraction_full  0.953
_reflns_number_total              6297
_reflns_number_gt                 5792
_reflns_threshold_expression      'I > 2\s(I)'
_reflns_Friedel_coverage          0.000
_reflns_Friedel_fraction_max      .
_reflns_Friedel_fraction_full     .
 
_reflns_special_details
;
 Reflections were merged by SHELXL according to the crystal
 class for the calculation of statistics and refinement.
 
 _reflns_Friedel_fraction is defined as the number of unique
 Friedel pairs measured divided by the number that would be
 possible theoretically, ignoring centric projections and
 systematic absences.
;
 
_computing_data_collection        'BluIce (McPhillips, 2002)'
_computing_cell_refinement        'XDS (Kabsch, 1993)' 
_computing_data_reduction         'XDS (Kabsch, 1993)' 
_computing_structure_solution     'ShelXT (Sheldrick, 2015)'
_computing_structure_refinement   'SHELXL-2013 (Sheldrick, 2013)'
_computing_molecular_graphics     'X-SEED'
_computing_publication_material   'XCIF V6.12 (BrukerAXS, 2001).'
 
_refine_special_details
;
 ?
;
_refine_ls_structure_factor_coef  Fsqd
_refine_ls_matrix_type            full
_refine_ls_weighting_scheme       calc
_refine_ls_weighting_details
;
 w=1/[\s^2^(Fo^2^)+(0.0510P)^2^+2.5234P]
 where P=(Fo^2^+2Fc^2^)/3
;
_atom_sites_solution_primary      direct
_atom_sites_solution_secondary    difmap
_atom_sites_solution_hydrogens    geom
_refine_ls_hydrogen_treatment     constr
_refine_ls_extinction_method      none
_refine_ls_extinction_coef        .
_refine_ls_number_reflns          6297
_refine_ls_number_parameters      301
_refine_ls_number_restraints      0
_refine_ls_R_factor_all           0.0439
_refine_ls_R_factor_gt            0.0408
_refine_ls_wR_factor_ref          0.1118
_refine_ls_wR_factor_gt           0.1097
_refine_ls_goodness_of_fit_ref    1.073
_refine_ls_restrained_S_all       1.073
_refine_ls_shift/su_max           0.001
_refine_ls_shift/su_mean          0.000
 
loop_
 _atom_site_label
 _atom_site_type_symbol
 _atom_site_fract_x
 _atom_site_fract_y
 _atom_site_fract_z
 _atom_site_U_iso_or_equiv
 _atom_site_adp_type
 _atom_site_occupancy
 _atom_site_site_symmetry_order  
 _atom_site_calc_flag
 _atom_site_refinement_flags_posn
 _atom_site_refinement_flags_adp
 _atom_site_refinement_flags_occupancy
 _atom_site_disorder_assembly
 _atom_site_disorder_group
Fe1 Fe 0.38723(2) 0.37967(2) 0.63633(2) 0.01479(8) Uani 1 1 d . . . . .
S1 S 0.48853(3) 0.51257(3) 0.70519(4) 0.01799(10) Uani 1 1 d . . . . .
O3 O 0.31768(10) 0.25558(9) 0.59295(11) 0.0195(2) Uani 1 1 d . . . . .
O1 O 0.25737(10) 0.44905(9) 0.57863(11) 0.0201(2) Uani 1 1 d . . . . .
O4 O 0.19816(12) 0.10785(10) 0.47832(13) 0.0263(3) Uani 1 1 d . . . . .
O2 O 0.10568(11) 0.56807(10) 0.55689(13) 0.0297(3) Uani 1 1 d . . . . .
N3 N 0.37681(12) 0.38202(10) 0.77497(12) 0.0169(3) Uani 1 1 d . . . . .
N5 N 0.43669(12) 0.44669(11) 0.86196(13) 0.0190(3) Uani 1 1 d . . . . .
N1 N 0.52516(12) 0.29960(11) 0.69220(13) 0.0204(3) Uani 1 1 d . . . . .
H1 H 0.5005 0.2311 0.6799 0.024 Uiso 1 1 calc R U . . .
N2 N 0.39221(13) 0.38437(11) 0.49681(14) 0.0210(3) Uani 1 1 d . . . . .
N4 N 0.54540(13) 0.57961(11) 0.91149(13) 0.0217(3) Uani 1 1 d . . . . .
H4A H 0.5457 0.5813 0.9770 0.026 Uiso 1 1 calc R U . . .
H4B H 0.5814 0.6231 0.8954 0.026 Uiso 1 1 calc R U . . .
C12 C 0.24593(13) 0.22496(12) 0.62180(14) 0.0169(3) Uani 1 1 d . . . . .
C2 C 0.13003(15) 0.56588(14) 0.47028(18) 0.0264(4) Uani 1 1 d . . . . .
C1 C 0.21504(14) 0.50078(12) 0.48634(15) 0.0212(3) Uani 1 1 d . . . . .
C19 C 0.48915(14) 0.50988(12) 0.83505(15) 0.0185(3) Uani 1 1 d . . . . .
C13 C 0.17766(14) 0.14692(13) 0.56009(15) 0.0202(3) Uani 1 1 d . . . . .
C18 C 0.30530(13) 0.33465(12) 0.78885(14) 0.0178(3) Uani 1 1 d . . . . .
H18 H 0.2987 0.3488 0.8543 0.021 Uiso 1 1 calc R U . . .
C17 C 0.23446(13) 0.26194(12) 0.71325(14) 0.0170(3) Uani 1 1 d . . . . .
C16 C 0.15497(14) 0.22556(12) 0.73822(16) 0.0200(3) Uani 1 1 d . . . . .
H16 H 0.1491 0.2505 0.8007 0.024 Uiso 1 1 calc R U . . .
C15 C 0.08590(15) 0.15423(13) 0.67286(17) 0.0239(4) Uani 1 1 d . . . . .
H15 H 0.0304 0.1320 0.6879 0.029 Uiso 1 1 calc R U . . .
C7 C 0.32919(15) 0.43316(13) 0.40850(16) 0.0234(3) Uani 1 1 d . . . . .
H7 H 0.3388 0.4269 0.3436 0.028 Uiso 1 1 calc R U . . .
C6 C 0.24548(15) 0.49632(13) 0.40075(16) 0.0235(4) Uani 1 1 d . . . . .
C3 C 0.07971(17) 0.62122(15) 0.3742(2) 0.0365(5) Uani 1 1 d . . . . .
H3 H 0.0233 0.6637 0.3648 0.044 Uiso 1 1 calc R U . . .
C8 C 0.47333(17) 0.31990(14) 0.49441(17) 0.0261(4) Uani 1 1 d . . . . .
H8A H 0.4966 0.3442 0.4404 0.031 Uiso 1 1 calc R U . . .
H8B H 0.4429 0.2546 0.4704 0.031 Uiso 1 1 calc R U . . .
C4 C 0.11117(19) 0.61539(17) 0.2899(2) 0.0398(6) Uani 1 1 d . . . . .
H4 H 0.0765 0.6543 0.2242 0.048 Uiso 1 1 calc R U . . .
C14 C 0.09794(15) 0.11465(13) 0.58393(17) 0.0245(4) Uani 1 1 d . . . . .
H14 H 0.0507 0.0649 0.5393 0.029 Uiso 1 1 calc R U . . .
C20 C 0.02199(18) 0.63280(16) 0.5457(2) 0.0390(5) Uani 1 1 d . . . . .
H20A H 0.0392 0.6981 0.5319 0.058 Uiso 1 1 calc R U . . .
H20B H 0.0161 0.6321 0.6153 0.058 Uiso 1 1 calc R U . . .
H20C H -0.0465 0.6124 0.4823 0.058 Uiso 1 1 calc R U . . .
C9 C 0.56770(16) 0.31662(14) 0.61184(18) 0.0260(4) Uani 1 1 d . . . . .
H9A H 0.6174 0.2641 0.6175 0.031 Uiso 1 1 calc R U . . .
H9B H 0.6076 0.3783 0.6295 0.031 Uiso 1 1 calc R U . . .
C10 C 0.60917(15) 0.30463(15) 0.81235(18) 0.0281(4) Uani 1 1 d . . . . .
H10A H 0.5752 0.2916 0.8605 0.034 Uiso 1 1 calc R U . . .
H10B H 0.6384 0.3709 0.8289 0.034 Uiso 1 1 calc R U . . .
C22 C 0.15066(18) 0.01491(16) 0.4357(2) 0.0335(5) Uani 1 1 d . . . . .
H22A H 0.0717 0.0218 0.3897 0.040 Uiso 1 1 calc R U . . .
H22B H 0.1654 -0.0286 0.4996 0.040 Uiso 1 1 calc R U . . .
C5 C 0.19173(17) 0.55382(16) 0.30216(18) 0.0322(5) Uani 1 1 d . . . . .
H5 H 0.2118 0.5495 0.2443 0.039 Uiso 1 1 calc R U . . .
C11 C 0.70201(17) 0.23445(17) 0.8440(2) 0.0389(5) Uani 1 1 d . . . . .
H11A H 0.6736 0.1689 0.8232 0.058 Uiso 1 1 calc R U . . .
H11B H 0.7503 0.2375 0.9255 0.058 Uiso 1 1 calc R U . . .
H11C H 0.7418 0.2517 0.8036 0.058 Uiso 1 1 calc R U . . .
C23 C 0.1963(3) -0.0276(2) 0.3650(3) 0.0602(9) Uani 1 1 d . . . . .
H23A H 0.1749 0.0119 0.2974 0.090 Uiso 1 1 calc R U . . .
H23B H 0.1686 -0.0932 0.3425 0.090 Uiso 1 1 calc R U . . .
H23C H 0.2750 -0.0294 0.4088 0.090 Uiso 1 1 calc R U . . .
 
loop_
 _atom_site_aniso_label
 _atom_site_aniso_U_11
 _atom_site_aniso_U_22
 _atom_site_aniso_U_33
 _atom_site_aniso_U_23
 _atom_site_aniso_U_13
 _atom_site_aniso_U_12
Fe1 0.01410(12) 0.01400(12) 0.01575(13) 0.00021(7) 0.00667(9) -0.00163(8)
S1 0.02014(19) 0.01607(18) 0.0188(2) 0.00026(13) 0.01008(15) -0.00315(14)
O3 0.0183(5) 0.0184(6) 0.0232(6) -0.0045(4) 0.0112(5) -0.0059(4)
O1 0.0167(5) 0.0210(6) 0.0198(6) 0.0035(4) 0.0062(4) 0.0028(4)
O4 0.0263(7) 0.0251(7) 0.0307(8) -0.0109(5) 0.0159(6) -0.0100(5)
O2 0.0192(6) 0.0245(7) 0.0397(9) -0.0016(6) 0.0095(6) 0.0044(5)
N3 0.0167(6) 0.0163(6) 0.0167(7) -0.0003(5) 0.0071(5) -0.0018(5)
N5 0.0201(7) 0.0192(7) 0.0174(7) -0.0027(5) 0.0087(5) -0.0057(5)
N1 0.0176(6) 0.0174(7) 0.0247(8) 0.0013(5) 0.0090(6) 0.0002(5)
N2 0.0231(7) 0.0199(7) 0.0220(8) -0.0024(5) 0.0123(6) -0.0060(5)
N4 0.0263(7) 0.0202(7) 0.0200(8) -0.0044(5) 0.0120(6) -0.0086(6)
C12 0.0139(7) 0.0151(7) 0.0199(8) 0.0021(5) 0.0064(6) -0.0006(5)
C2 0.0170(8) 0.0200(8) 0.0310(10) 0.0009(7) 0.0022(7) -0.0015(6)
C1 0.0168(7) 0.0170(7) 0.0226(9) 0.0014(6) 0.0034(6) -0.0037(6)
C19 0.0176(7) 0.0174(7) 0.0194(8) -0.0005(5) 0.0079(6) -0.0012(6)
C13 0.0183(7) 0.0183(7) 0.0227(9) -0.0023(6) 0.0086(6) -0.0021(6)
C18 0.0174(7) 0.0181(7) 0.0179(8) 0.0002(5) 0.0085(6) -0.0016(6)
C17 0.0150(7) 0.0144(7) 0.0197(8) 0.0009(5) 0.0067(6) -0.0012(5)
C16 0.0183(7) 0.0179(7) 0.0245(9) 0.0019(6) 0.0108(6) 0.0000(6)
C15 0.0197(8) 0.0203(8) 0.0340(10) -0.0008(7) 0.0148(7) -0.0051(6)
C7 0.0277(9) 0.0232(8) 0.0191(9) -0.0023(6) 0.0109(7) -0.0102(7)
C6 0.0214(8) 0.0220(8) 0.0187(9) 0.0018(6) 0.0026(6) -0.0078(6)
C3 0.0228(9) 0.0255(10) 0.0414(13) 0.0083(8) -0.0008(8) 0.0023(7)
C8 0.0342(10) 0.0219(8) 0.0305(10) -0.0021(7) 0.0221(8) -0.0014(7)
C4 0.0307(11) 0.0327(11) 0.0335(12) 0.0152(8) -0.0031(9) -0.0041(8)
C14 0.0199(8) 0.0211(8) 0.0321(10) -0.0049(6) 0.0120(7) -0.0069(6)
C20 0.0231(9) 0.0260(10) 0.0610(16) -0.0045(9) 0.0144(10) 0.0058(8)
C9 0.0244(8) 0.0224(8) 0.0382(11) -0.0004(7) 0.0205(8) -0.0002(7)
C10 0.0187(8) 0.0279(9) 0.0309(11) 0.0055(7) 0.0063(7) 0.0026(7)
C22 0.0304(10) 0.0305(10) 0.0408(12) -0.0172(8) 0.0178(9) -0.0136(8)
C5 0.0298(10) 0.0324(10) 0.0225(10) 0.0078(7) 0.0026(7) -0.0106(8)
C11 0.0235(9) 0.0293(11) 0.0523(15) 0.0104(9) 0.0085(9) 0.0067(8)
C23 0.0663(19) 0.0525(17) 0.080(2) -0.0346(16) 0.0496(18) -0.0261(15)
 
_geom_special_details
;
 All esds (except the esd in the dihedral angle between two l.s. planes)
 are estimated using the full covariance matrix.  The cell esds are taken
 into account individually in the estimation of esds in distances, angles
 and torsion angles; correlations between esds in cell parameters are only
 used when they are defined by crystal symmetry.  An approximate (isotropic)
 treatment of cell esds is used for estimating esds involving l.s. planes.
;
 
loop_
 _geom_bond_atom_site_label_1
 _geom_bond_atom_site_label_2
 _geom_bond_distance
 _geom_bond_site_symmetry_2
 _geom_bond_publ_flag
Fe1 O1 1.8815(13) . ?
Fe1 N2 1.9148(16) . ?
Fe1 O3 1.9315(13) . ?
Fe1 N3 1.9421(16) . ?
Fe1 N1 2.0501(16) . ?
Fe1 S1 2.2477(6) . ?
S1 C19 1.7455(19) . ?
O3 C12 1.317(2) . ?
O1 C1 1.309(2) . ?
O4 C13 1.377(2) . ?
O4 C22 1.442(2) . ?
O2 C2 1.364(3) . ?
O2 C20 1.435(2) . ?
N3 C18 1.291(2) . ?
N3 N5 1.397(2) . ?
N5 C19 1.306(2) . ?
N1 C10 1.485(3) . ?
N1 C9 1.486(2) . ?
N1 H1 1.0000 . ?
N2 C7 1.288(3) . ?
N2 C8 1.466(2) . ?
N4 C19 1.361(2) . ?
N4 H4A 0.8800 . ?
N4 H4B 0.8800 . ?
C12 C17 1.413(2) . ?
C12 C13 1.426(2) . ?
C2 C3 1.377(3) . ?
C2 C1 1.435(3) . ?
C1 C6 1.410(3) . ?
C13 C14 1.384(3) . ?
C18 C17 1.445(2) . ?
C18 H18 0.9500 . ?
C17 C16 1.410(2) . ?
C16 C15 1.375(3) . ?
C16 H16 0.9500 . ?
C15 C14 1.400(3) . ?
C15 H15 0.9500 . ?
C7 C6 1.435(3) . ?
C7 H7 0.9500 . ?
C6 C5 1.421(3) . ?
C3 C4 1.404(4) . ?
C3 H3 0.9500 . ?
C8 C9 1.508(3) . ?
C8 H8A 0.9900 . ?
C8 H8B 0.9900 . ?
C4 C5 1.369(4) . ?
C4 H4 0.9500 . ?
C14 H14 0.9500 . ?
C20 H20A 0.9800 . ?
C20 H20B 0.9800 . ?
C20 H20C 0.9800 . ?
C9 H9A 0.9900 . ?
C9 H9B 0.9900 . ?
C10 C11 1.523(3) . ?
C10 H10A 0.9900 . ?
C10 H10B 0.9900 . ?
C22 C23 1.502(4) . ?
C22 H22A 0.9900 . ?
C22 H22B 0.9900 . ?
C5 H5 0.9500 . ?
C11 H11A 0.9800 . ?
C11 H11B 0.9800 . ?
C11 H11C 0.9800 . ?
C23 H23A 0.9800 . ?
C23 H23B 0.9800 . ?
C23 H23C 0.9800 . ?
 
loop_
 _geom_angle_atom_site_label_1
 _geom_angle_atom_site_label_2
 _geom_angle_atom_site_label_3
 _geom_angle
 _geom_angle_site_symmetry_1
 _geom_angle_site_symmetry_3
 _geom_angle_publ_flag
O1 Fe1 N2 93.48(7) . . ?
O1 Fe1 O3 94.39(6) . . ?
N2 Fe1 O3 89.09(6) . . ?
O1 Fe1 N3 83.33(6) . . ?
N2 Fe1 N3 176.48(6) . . ?
O3 Fe1 N3 92.62(6) . . ?
O1 Fe1 N1 177.09(6) . . ?
N2 Fe1 N1 84.65(7) . . ?
O3 Fe1 N1 83.38(6) . . ?
N3 Fe1 N1 98.59(7) . . ?
O1 Fe1 S1 93.09(5) . . ?
N2 Fe1 S1 93.66(5) . . ?
O3 Fe1 S1 171.86(4) . . ?
N3 Fe1 S1 85.06(5) . . ?
N1 Fe1 S1 89.25(5) . . ?
C19 S1 Fe1 95.44(6) . . ?
C12 O3 Fe1 123.43(11) . . ?
C1 O1 Fe1 126.07(12) . . ?
C13 O4 C22 115.86(15) . . ?
C2 O2 C20 117.01(18) . . ?
C18 N3 N5 114.17(14) . . ?
C18 N3 Fe1 123.56(12) . . ?
N5 N3 Fe1 121.65(11) . . ?
C19 N5 N3 113.34(14) . . ?
C10 N1 C9 113.35(15) . . ?
C10 N1 Fe1 120.11(12) . . ?
C9 N1 Fe1 106.80(11) . . ?
C10 N1 H1 105.1 . . ?
C9 N1 H1 105.1 . . ?
Fe1 N1 H1 105.1 . . ?
C7 N2 C8 120.32(17) . . ?
C7 N2 Fe1 126.33(14) . . ?
C8 N2 Fe1 113.24(13) . . ?
C19 N4 H4A 120.0 . . ?
C19 N4 H4B 120.0 . . ?
H4A N4 H4B 120.0 . . ?
O3 C12 C17 124.28(15) . . ?
O3 C12 C13 118.39(16) . . ?
C17 C12 C13 117.29(15) . . ?
O2 C2 C3 124.3(2) . . ?
O2 C2 C1 114.72(17) . . ?
C3 C2 C1 120.9(2) . . ?
O1 C1 C6 124.98(17) . . ?
O1 C1 C2 117.43(18) . . ?
C6 C1 C2 117.58(17) . . ?
N5 C19 N4 118.19(16) . . ?
N5 C19 S1 124.01(14) . . ?
N4 C19 S1 117.77(13) . . ?
O4 C13 C14 124.19(16) . . ?
O4 C13 C12 115.15(15) . . ?
C14 C13 C12 120.67(17) . . ?
N3 C18 C17 125.53(16) . . ?
N3 C18 H18 117.2 . . ?
C17 C18 H18 117.2 . . ?
C16 C17 C12 120.80(15) . . ?
C16 C17 C18 116.44(16) . . ?
C12 C17 C18 122.70(15) . . ?
C15 C16 C17 120.55(17) . . ?
C15 C16 H16 119.7 . . ?
C17 C16 H16 119.7 . . ?
C16 C15 C14 119.53(17) . . ?
C16 C15 H15 120.2 . . ?
C14 C15 H15 120.2 . . ?
N2 C7 C6 124.89(18) . . ?
N2 C7 H7 117.6 . . ?
C6 C7 H7 117.6 . . ?
C1 C6 C5 120.28(19) . . ?
C1 C6 C7 121.87(16) . . ?
C5 C6 C7 117.84(19) . . ?
C2 C3 C4 120.5(2) . . ?
C2 C3 H3 119.8 . . ?
C4 C3 H3 119.8 . . ?
N2 C8 C9 107.77(15) . . ?
N2 C8 H8A 110.2 . . ?
C9 C8 H8A 110.2 . . ?
N2 C8 H8B 110.2 . . ?
C9 C8 H8B 110.2 . . ?
H8A C8 H8B 108.5 . . ?
C5 C4 C3 120.19(19) . . ?
C5 C4 H4 119.9 . . ?
C3 C4 H4 119.9 . . ?
C13 C14 C15 120.98(17) . . ?
C13 C14 H14 119.5 . . ?
C15 C14 H14 119.5 . . ?
O2 C20 H20A 109.5 . . ?
O2 C20 H20B 109.5 . . ?
H20A C20 H20B 109.5 . . ?
O2 C20 H20C 109.5 . . ?
H20A C20 H20C 109.5 . . ?
H20B C20 H20C 109.5 . . ?
N1 C9 C8 107.89(15) . . ?
N1 C9 H9A 110.1 . . ?
C8 C9 H9A 110.1 . . ?
N1 C9 H9B 110.1 . . ?
C8 C9 H9B 110.1 . . ?
H9A C9 H9B 108.4 . . ?
N1 C10 C11 114.21(19) . . ?
N1 C10 H10A 108.7 . . ?
C11 C10 H10A 108.7 . . ?
N1 C10 H10B 108.7 . . ?
C11 C10 H10B 108.7 . . ?
H10A C10 H10B 107.6 . . ?
O4 C22 C23 110.24(19) . . ?
O4 C22 H22A 109.6 . . ?
C23 C22 H22A 109.6 . . ?
O4 C22 H22B 109.6 . . ?
C23 C22 H22B 109.6 . . ?
H22A C22 H22B 108.1 . . ?
C4 C5 C6 120.5(2) . . ?
C4 C5 H5 119.7 . . ?
C6 C5 H5 119.7 . . ?
C10 C11 H11A 109.5 . . ?
C10 C11 H11B 109.5 . . ?
H11A C11 H11B 109.5 . . ?
C10 C11 H11C 109.5 . . ?
H11A C11 H11C 109.5 . . ?
H11B C11 H11C 109.5 . . ?
C22 C23 H23A 109.5 . . ?
C22 C23 H23B 109.5 . . ?
H23A C23 H23B 109.5 . . ?
C22 C23 H23C 109.5 . . ?
H23A C23 H23C 109.5 . . ?
H23B C23 H23C 109.5 . . ?
 
loop_
 _geom_hbond_atom_site_label_D 
 _geom_hbond_atom_site_label_H 
 _geom_hbond_atom_site_label_A 
 _geom_hbond_distance_DH 
 _geom_hbond_distance_HA 
 _geom_hbond_distance_DA 
 _geom_hbond_angle_DHA 
 _geom_hbond_site_symmetry_A 
N4 H4A N5  0.88 2.10 2.963(2) 166.6 3_667
N4 H4B O3  0.88 2.29 3.134(2) 161.7 2_656
C7 H7 S1  0.95 2.93 3.645(2) 132.7 3_666
C8 H8A S1  0.99 2.87 3.783(2) 153.7 3_666
C20 H20C O2  0.98 2.62 3.252(3) 122.7 3_566
C10 H10B S1  0.99 2.79 3.315(2) 113.9 .
N1 H1 N4  1.00 2.37 3.310(2) 156.9 2_646
N4 H4A N5  0.88 2.10 2.963(2) 166.6 3_667
N4 H4B O3  0.88 2.29 3.134(2) 161.7 2_656
C7 H7 S1  0.95 2.93 3.645(2) 132.7 3_666
C8 H8A S1  0.99 2.87 3.783(2) 153.7 3_666
C20 H20C O2  0.98 2.62 3.252(3) 122.7 3_566
C10 H10B S1  0.99 2.79 3.315(2) 113.9 .
 
_refine_diff_density_max    1.476
_refine_diff_density_min   -0.637
_refine_diff_density_rms    0.075

_shelxl_version_number 2013-2

_shelx_res_file
;
REM
TITL LD41a_a.res in P2(1)/c
CELL 0.71073 14.1220 13.8890 13.4700 90.000 118.396 90.000
ZERR 4.0000 0.0028 0.0028 0.0027 0.000 0.030 0.000
LATT 1
SYMM -X, 0.5+Y, 0.5-Z
SFAC C H N O S FE
UNIT 88 112 20 16 4 4
MERG 2
FMAP 2
GRID
PLAN 20
TEMP -173
SIZE 0.03 0.02 0.01
BOND $H
HTAB
EQIV $1 -x+1, -y+1, -z+2
HTAB N4 N5_$1
EQIV $2 -x+1, y+1/2, -z+3/2
HTAB N4 O3_$2
EQIV $3 -x+1, -y+1, -z+1
HTAB C7 S1_$3
HTAB C8 S1_$3
EQIV $4 -x, -y+1, -z+1
HTAB C20 O2_$4
HTAB C10 S1
EQIV $5 -x+1, y-1/2, -z+3/2
HTAB N1 N4_$5
HTAB N4 N5_$1
HTAB N4 O3_$2
HTAB C7 S1_$3
HTAB C8 S1_$3
HTAB C20 O2_$4
HTAB C10 S1
L.S. 20
ACTA 55
WGHT    0.051000    2.523400
FVAR       0.87607
FE1   6    0.387231    0.379671    0.636332    11.00000    0.01410    0.01400 =
         0.01575    0.00021    0.00667   -0.00163
S1    5    0.488534    0.512574    0.705185    11.00000    0.02014    0.01607 =
         0.01877    0.00026    0.01008   -0.00315
O3    4    0.317683    0.255578    0.592952    11.00000    0.01834    0.01843 =
         0.02324   -0.00449    0.01118   -0.00587
O1    4    0.257370    0.449047    0.578627    11.00000    0.01669    0.02097 =
         0.01975    0.00355    0.00624    0.00280
O4    4    0.198160    0.107847    0.478321    11.00000    0.02628    0.02505 =
         0.03067   -0.01090    0.01594   -0.00998
O2    4    0.105681    0.568068    0.556893    11.00000    0.01922    0.02452 =
         0.03970   -0.00160    0.00952    0.00437
N3    3    0.376805    0.382018    0.774973    11.00000    0.01672    0.01628 =
         0.01671   -0.00029    0.00711   -0.00179
N5    3    0.436693    0.446694    0.861957    11.00000    0.02011    0.01916 =
         0.01738   -0.00266    0.00868   -0.00568
N1    3    0.525161    0.299597    0.692196    11.00000    0.01762    0.01743 =
         0.02474    0.00129    0.00898    0.00024
AFIX  13
H1    2    0.500495    0.231061    0.679880    11.00000   -1.20000
AFIX   0
N2    3    0.392211    0.384365    0.496815    11.00000    0.02305    0.01987 =
         0.02201   -0.00244    0.01229   -0.00600
N4    3    0.545403    0.579611    0.911486    11.00000    0.02628    0.02016 =
         0.02002   -0.00437    0.01205   -0.00857
AFIX  93
H4A   2    0.545750    0.581265    0.976966    11.00000   -1.20000
H4B   2    0.581438    0.623059    0.895443    11.00000   -1.20000
AFIX   0
C12   1    0.245927    0.224961    0.621805    11.00000    0.01385    0.01511 =
         0.01993    0.00208    0.00644   -0.00061
C2    1    0.130027    0.565878    0.470285    11.00000    0.01696    0.02001 =
         0.03097    0.00092    0.00224   -0.00153
C1    1    0.215041    0.500780    0.486338    11.00000    0.01682    0.01698 =
         0.02260    0.00141    0.00342   -0.00367
C19   1    0.489151    0.509876    0.835048    11.00000    0.01764    0.01736 =
         0.01940   -0.00047    0.00795   -0.00123
C13   1    0.177655    0.146919    0.560092    11.00000    0.01829    0.01828 =
         0.02269   -0.00230    0.00858   -0.00207
C18   1    0.305304    0.334646    0.788848    11.00000    0.01740    0.01815 =
         0.01789    0.00016    0.00852   -0.00161
AFIX  43
H18   2    0.298702    0.348780    0.854293    11.00000   -1.20000
AFIX   0
C17   1    0.234462    0.261941    0.713254    11.00000    0.01497    0.01444 =
         0.01970    0.00092    0.00671   -0.00123
C16   1    0.154971    0.225559    0.738225    11.00000    0.01833    0.01795 =
         0.02451    0.00188    0.01081    0.00005
AFIX  43
H16   2    0.149073    0.250524    0.800720    11.00000   -1.20000
AFIX   0
C15   1    0.085895    0.154225    0.672855    11.00000    0.01975    0.02033 =
         0.03402   -0.00078    0.01484   -0.00515
AFIX  43
H15   2    0.030401    0.131967    0.687941    11.00000   -1.20000
AFIX   0
C7    1    0.329186    0.433159    0.408500    11.00000    0.02773    0.02316 =
         0.01908   -0.00227    0.01088   -0.01021
AFIX  43
H7    2    0.338829    0.426870    0.343645    11.00000   -1.20000
AFIX   0
C6    1    0.245484    0.496316    0.400754    11.00000    0.02139    0.02203 =
         0.01866    0.00182    0.00258   -0.00783
C3    1    0.079705    0.621223    0.374159    11.00000    0.02282    0.02552 =
         0.04140    0.00833   -0.00079    0.00227
AFIX  43
H3    2    0.023286    0.663657    0.364795    11.00000   -1.20000
AFIX   0
C8    1    0.473334    0.319896    0.494414    11.00000    0.03423    0.02190 =
         0.03047   -0.00215    0.02211   -0.00142
AFIX  23
H8A   2    0.496639    0.344187    0.440365    11.00000   -1.20000
H8B   2    0.442914    0.254572    0.470422    11.00000   -1.20000
AFIX   0
C4    1    0.111168    0.615394    0.289908    11.00000    0.03069    0.03267 =
         0.03348    0.01516   -0.00310   -0.00415
AFIX  43
H4    2    0.076454    0.654285    0.224216    11.00000   -1.20000
AFIX   0
C14   1    0.097944    0.114651    0.583930    11.00000    0.01990    0.02113 =
         0.03212   -0.00495    0.01197   -0.00694
AFIX  43
H14   2    0.050698    0.064906    0.539287    11.00000   -1.20000
AFIX   0
C20   1    0.021993    0.632803    0.545702    11.00000    0.02308    0.02597 =
         0.06102   -0.00454    0.01443    0.00584
AFIX 137
H20A  2    0.039237    0.698126    0.531859    11.00000   -1.50000
H20B  2    0.016127    0.632079    0.615327    11.00000   -1.50000
H20C  2   -0.046549    0.612421    0.482278    11.00000   -1.50000
AFIX   0
C9    1    0.567699    0.316622    0.611836    11.00000    0.02442    0.02238 =
         0.03817   -0.00037    0.02049   -0.00016
AFIX  23
H9A   2    0.617449    0.264109    0.617543    11.00000   -1.20000
H9B   2    0.607629    0.378269    0.629493    11.00000   -1.20000
AFIX   0
C10   1    0.609170    0.304629    0.812351    11.00000    0.01869    0.02787 =
         0.03094    0.00546    0.00632    0.00263
AFIX  23
H10A  2    0.575194    0.291596    0.860521    11.00000   -1.20000
H10B  2    0.638417    0.370907    0.828904    11.00000   -1.20000
AFIX   0
C22   1    0.150665    0.014911    0.435738    11.00000    0.03040    0.03052 =
         0.04077   -0.01715    0.01780   -0.01360
AFIX  23
H22A  2    0.071671    0.021760    0.389692    11.00000   -1.20000
H22B  2    0.165359   -0.028642    0.499645    11.00000   -1.20000
AFIX   0
C5    1    0.191727    0.553823    0.302161    11.00000    0.02980    0.03236 =
         0.02248    0.00782    0.00265   -0.01060
AFIX  43
H5    2    0.211846    0.549512    0.244295    11.00000   -1.20000
AFIX   0
C11   1    0.702010    0.234445    0.843980    11.00000    0.02350    0.02932 =
         0.05232    0.01037    0.00852    0.00670
AFIX 137
H11A  2    0.673599    0.168936    0.823182    11.00000   -1.50000
H11B  2    0.750323    0.237546    0.925493    11.00000   -1.50000
H11C  2    0.741849    0.251691    0.803619    11.00000   -1.50000
AFIX   0
C23   1    0.196257   -0.027634    0.364970    11.00000    0.06632    0.05254 =
         0.07987   -0.03462    0.04962   -0.02611
AFIX 137
H23A  2    0.174909    0.011942    0.297403    11.00000   -1.50000
H23B  2    0.168645   -0.093195    0.342546    11.00000   -1.50000
H23C  2    0.274962   -0.029408    0.408790    11.00000   -1.50000
AFIX   0
HKLF 4

REM  LD41a_a.res in P2(1)/c
REM R1 =  0.0408 for    5792 Fo > 4sig(Fo)  and  0.0439 for all    6297 data
REM    301 parameters refined using      0 restraints

END

WGHT      0.0506      2.5439

REM Instructions for potential hydrogen bonds
HTAB N1 N4_$5
HTAB N4 N5_$1
HTAB N4 O3_$2
HTAB C7 S1_$3
HTAB C8 S1_$3
HTAB C20 O2_$4
HTAB C10 S1

REM Highest difference peak  1.476,  deepest hole -0.637,  1-sigma level  0.075
Q1    1   0.2457 -0.0895  0.2926  11.00000  0.05    0.69
Q2    1   0.1914 -0.0527  0.4770  11.00000  0.05    0.53
Q3    1   0.6167  0.5987  0.9185  11.00000  0.05    0.40
Q4    1   0.2388  0.4996  0.4532  11.00000  0.05    0.39
Q5    1   0.3843  0.3795  0.7306  11.00000  0.05    0.38
Q6    1   0.2710  0.2946  0.7525  11.00000  0.05    0.37
Q7    1   0.2080  0.1884  0.5881  11.00000  0.05    0.36
Q8    1   0.1733  0.5346  0.4736  11.00000  0.05    0.36
Q9    1   0.3823  0.3816  0.5337  11.00000  0.05    0.34
Q10   1   0.1409  0.1319  0.5763  11.00000  0.05    0.33
Q11   1   0.4503  0.4801  0.8450  11.00000  0.05    0.33
Q12   1   0.5170  0.5432  0.8775  11.00000  0.05    0.33
Q13   1   0.3638  0.2871  0.6286  11.00000  0.05    0.33
Q14   1   0.1275  0.1832  0.7081  11.00000  0.05    0.33
Q15   1   0.2236  0.5298  0.3549  11.00000  0.05    0.32
Q16   1   0.1719  0.1399  0.4972  11.00000  0.05    0.32
Q17   1   0.2927  0.4219  0.5916  11.00000  0.05    0.30
Q18   1   0.0976  0.5920  0.4244  11.00000  0.05    0.29
Q19   1   0.3993  0.4762  0.6456  11.00000  0.05    0.29
Q20   1   0.2372  0.2474  0.6593  11.00000  0.05    0.29
;
_shelx_res_checksum   96416

_shelx_hkl_file
;
  -2   0   0  168.03    6.57
  -2   0   0  153.35    6.00
   2   0   0  159.60    6.36
   2   0   0  172.11    6.67
  -4   0   0  721.75   24.66
  -4   0   0  755.35   25.80
   4   0   0  729.50   24.92
   4   0   0  663.84   22.75
  -5   0   0  169.06    7.65
   5   0   0  173.46    7.76
   5   0   0  173.25    7.65
  -6   0   0  374.11   13.60
   6   0   0  385.48   14.01
   6   0   0  390.86   14.11
   7   0   0 2382.39   78.22
   7   0   0 2451.15   80.50
   8   0   0 4364.09  142.49
   8   0   0 4500.58  146.99
   9   0   0 2010.66   66.33
   9   0   0 1952.75   64.52
  10   0   0 4398.22  143.83
  10   0   0 4132.47  135.15
  11   0   0  156.50    7.96
  11   0   0  154.59    7.55
  12   0   0    6.62    5.17
  12   0   0   12.36    4.70
  14   0   0 1656.50   55.01
  14   0   0 1553.62   51.60
  16   0   0  533.56   19.08
  16   0   0  487.18   17.27
  16  -1   0  266.21   10.55
  16  -1   0  250.44   10.29
  15  -1   0  807.05   27.45
  15  -1   0  787.93   27.04
  14  -1   0  598.70   20.99
  14  -1   0  572.33   20.37
  13  -1   0  207.63    9.25
  13  -1   0  231.31   10.13
  12  -1   0 1083.14   36.66
  12  -1   0 1052.64   35.67
  11  -1   0   24.40    4.70
  11  -1   0   29.21    5.27
  10  -1   0  599.22   20.89
  10  -1   0  575.43   20.53
   9  -1   0   -0.93    4.14
   9  -1   0    1.03    4.24
   8  -1   0  122.89    6.51
   8  -1   0  125.74    6.67
  -8   1   0  123.10    6.00
   7  -1   0  673.15   23.16
   7  -1   0  723.82   24.76
  -7   1   0  671.08   23.01
   6  -1   0 2045.81   67.37
   6  -1   0 1939.83   63.85
  -6   1   0 2032.37   66.85
   5  -1   0 1027.30   34.38
   5  -1   0  919.25   30.76
  -5   1   0  985.94   32.93
   4  -1   0  754.84   25.64
   4  -1   0  777.07   26.42
  -4   1   0  703.14   23.99
   3  -1   0   68.66    5.12
  -3   1   0   72.64    5.33
   0  -1   0    0.57    1.19
   0   1   0    1.55    1.09
  -3  -1   0   66.95    5.12
   3   1   0   68.45    5.27
  -4  -1   0  733.64   25.08
   4   1   0  820.50   27.76
   4   1   0  757.42   25.85
  -5  -1   0  828.77   28.02
   5   1   0  972.50   32.62
   5   1   0 1002.48   33.50
  -6  -1   0 2023.58   66.64
   6   1   0 1958.96   64.47
   6   1   0 2079.94   68.40
  -7  -1   0  740.36   25.33
   7   1   0  651.43   22.49
   7   1   0  719.68   24.66
  -8  -1   0  128.74    6.62
   8   1   0  126.15    6.62
   8   1   0  116.79    6.05
  -9  -1   0    6.77    4.81
   9   1   0    4.34    4.50
   9   1   0    2.12    4.29
  10   1   0  540.79   19.28
  10   1   0  575.43   20.22
  11   1   0   21.77    5.27
  11   1   0   21.61    4.81
  12   1   0 1020.58   34.59
  12   1   0 1025.23   34.79
  13   1   0  216.32    9.56
  13   1   0  224.80    9.72
  14   1   0  590.43   20.84
  14   1   0  585.77   20.53
  15   1   0  808.61   27.76
  15   1   0  725.88   24.87
  16   1   0  251.58   10.50
  16   1   0  268.23   10.65
  16  -2   0   85.41    5.84
  16  -2   0   77.86    6.15
  15  -2   0   11.79    4.50
  15  -2   0   18.46    5.33
  14  -2   0  204.48    9.25
  14  -2   0  209.85    9.51
  13  -2   0 1226.35   41.21
  13  -2   0 1180.34   39.81
  12  -2   0   41.00    5.22
  12  -2   0   41.62    5.48
  11  -2   0   -3.77    4.55
  11  -2   0    4.39    4.86
  10  -2   0  247.91   10.44
  10  -2   0  248.58   10.13
 -10   2   0  242.89    9.56
   9  -2   0   54.13    5.07
   9  -2   0   50.10    5.38
  -9   2   0   50.62    4.55
   8  -2   0 1334.41   44.41
   8  -2   0 1238.76   41.26
  -8   2   0 1213.43   40.43
   7  -2   0 1633.76   54.08
   7  -2   0 1645.13   54.44
  -7   2   0 1629.62   53.87
   6  -2   0   86.75    5.27
   6  -2   0   87.79    5.48
  -6   2   0   90.94    5.38
   5  -2   0   11.17    3.93
   5  -2   0    8.48    3.67
  -5   2   0    7.13    3.46
   4  -2   0  604.90   20.89
  -4   2   0  521.66   18.20
   2  -2   0  886.16   29.68
  -2   2   0  964.23   32.11
   1  -2   0    1.91    3.21
  -1   2   0    3.67    3.05
  -2  -2   0  836.52   27.97
   2   2   0  761.04   25.54
  -4  -2   0  582.15   20.22
   4   2   0  511.84   17.84
  -5  -2   0   12.41    4.50
   5   2   0    9.41    4.14
  -6  -2   0   98.23    5.89
  -7  -2   0 1770.25   58.47
   7   2   0 1625.48   53.77
   7   2   0 1558.79   51.70
  -8  -2   0 1141.56   38.31
   8   2   0 1351.98   44.93
   8   2   0 1288.91   42.91
  -9  -2   0   53.15    5.12
   9   2   0   53.72    4.91
   9   2   0   46.94    5.17
 -10  -2   0  239.12   10.08
  10   2   0  228.05    9.87
  10   2   0  244.86    9.93
 -11  -2   0   -2.64    4.91
  11   2   0   -0.72    4.50
  11   2   0   -0.52    4.76
  12   2   0   45.08    5.27
  12   2   0   34.07    5.58
  13   2   0 1207.74   40.59
  13   2   0 1223.77   41.10
  14   2   0  195.07    8.69
  14   2   0  202.41    9.25
  15   2   0   10.70    4.55
  15   2   0   14.17    4.34
  16   2   0   90.48    5.58
  16   2   0   86.65    6.36
  16  -3   0  600.25   20.78
  16  -3   0  660.22   23.01
  15  -3   0  534.59   18.77
  15  -3   0  527.87   18.87
  14  -3   0  168.29    8.12
  14  -3   0  142.44    7.70
  13  -3   0   77.76    6.10
  13  -3   0   77.66    6.15
  12  -3   0   88.62    6.20
  12  -3   0   95.34    6.51
  11  -3   0  753.80   26.06
  11  -3   0  748.63   26.01
 -11   3   0  715.54   24.66
  10  -3   0 2133.71   70.47
  10  -3   0 2250.03   74.29
 -10   3   0 2055.64   67.78
   9  -3   0   28.80    4.70
   9  -3   0   29.16    4.65
  -9   3   0   30.76    4.24
   8  -3   0 1201.02   40.07
   8  -3   0 1175.68   39.34
  -8   3   0 1196.88   39.91
   7  -3   0 1070.21   35.88
   7  -3   0 1021.10   34.28
  -7   3   0 1064.01   35.62
   6  -3   0 2931.97   96.01
  -6   3   0 2806.34   91.92
   5  -3   0  213.32    8.69
  -5   3   0  207.89    8.48
   4  -3   0 2332.24   76.47
  -4   3   0 2219.53   72.80
   1  -3   0 1928.45   63.33
  -1   3   0 1843.15   60.59
   0  -3   0   -6.26    4.08
   0   3   0    1.24    3.46
  -1  -3   0 1794.03   58.94
   1   3   0 1735.61   57.03
  -4  -3   0 2194.71   72.07
   4   3   0 2143.01   70.31
  -5  -3   0  232.66    9.15
   5   3   0  209.39    8.63
  -6  -3   0 2681.74   87.94
   6   3   0 2977.47   97.46
  -7  -3   0 1111.06   37.17
   7   3   0 1018.51   34.17
  -8  -3   0 1316.83   44.00
   8   3   0 1194.30   39.91
   8   3   0 1127.08   37.69
  -9  -3   0   36.66    5.02
   9   3   0   33.66    4.96
   9   3   0   29.31    4.29
 -10  -3   0 2247.97   74.19
  10   3   0 2030.82   67.06
  10   3   0 2181.79   72.02
 -11  -3   0  748.63   26.01
  11   3   0  750.70   25.90
  11   3   0  784.82   27.14
 -12  -3   0   75.48    6.20
  12   3   0   82.98    6.26
  12   3   0   86.19    6.10
 -13  -3   0   60.23    5.17
  13   3   0   78.64    5.79
  13   3   0   67.31    6.05
  14   3   0  158.31    7.96
  14   3   0  162.44    7.65
  15   3   0  509.31   18.04
  15   3   0  514.99   18.35
  16   3   0  647.30   22.44
  16   3   0  609.04   20.99
  16  -4   0   -1.50    5.07
  16  -4   0   -0.83    4.24
  15  -4   0  272.10   10.70
  15  -4   0  285.96   11.48
  14  -4   0 1430.05   47.67
  14  -4   0 1335.96   44.57
  13  -4   0  768.28   26.47
  13  -4   0  774.48   26.73
  12  -4   0 1905.70   63.13
  12  -4   0 1842.63   61.11
 -12   4   0 1945.00   64.26
  11  -4   0 2499.23   82.31
  11  -4   0 2571.10   84.63
 -11   4   0 2374.63   78.17
  10  -4   0 1921.21   63.54
  10  -4   0 1920.70   63.59
 -10   4   0 1869.00   61.73
   9  -4   0  820.50   28.07
   9  -4   0  799.82   27.40
  -9   4   0  796.71   27.04
   8  -4   0  173.20    7.91
   8  -4   0  179.40    7.96
  -8   4   0  190.57    8.27
   7  -4   0   32.68    4.50
  -7   4   0   24.76    4.19
  -6   4   0 4356.34  142.18
   1  -4   0 1324.58   44.00
  -1   4   0 1221.18   40.64
   0  -4   0 1233.59   41.15
   0   4   0  956.99   32.21
  -1  -4   0 1179.30   39.29
   1   4   0 1139.49   37.95
  -6  -4   0 4390.46  143.32
   6   4   0 3911.71  127.81
  -7  -4   0   17.58    4.76
   7   4   0   13.29    4.14
  -8  -4   0  188.45    8.63
   8   4   0  179.40    8.07
  -9  -4   0  826.70   28.38
   9   4   0  809.12   27.66
   9   4   0  799.82   27.35
 -10  -4   0 1936.21   64.16
  10   4   0 1679.25   55.68
  10   4   0 1848.83   61.16
 -11  -4   0 2420.13   79.88
  11   4   0 2469.25   81.33
  11   4   0 2374.12   78.22
 -12  -4   0 1679.77   56.04
  12   4   0 1848.32   61.37
  12   4   0 1962.58   64.99
 -13  -4   0  800.85   27.76
  13   4   0  759.49   26.21
  13   4   0  803.95   27.66
 -14  -4   0 1137.94   38.47
  14   4   0 1396.45   46.63
  14   4   0 1415.58   47.10
  15   4   0  275.15   11.17
  15   4   0  286.11   11.06
  16   4   0    0.21    4.29
  16   4   0   -2.22    4.39
  16  -5   0   10.29    5.33
  16  -5   0   10.81    4.39
  15  -5   0   37.02    5.69
  15  -5   0   38.52    4.81
  14  -5   0   59.09    5.79
  14  -5   0   56.46    5.07
  13  -5   0    6.26    5.48
  13  -5   0    3.72    4.76
 -13   5   0    8.22    4.45
  12  -5   0  267.50   10.96
  12  -5   0  261.40   11.06
 -12   5   0  254.01   10.39
  11  -5   0 4823.20  157.69
  11  -5   0 5145.81  168.03
 -11   5   0 4668.61  152.52
  10  -5   0 2757.22   90.63
  10  -5   0 2564.38   84.48
 -10   5   0 2723.62   89.44
   9  -5   0  704.69   24.51
   9  -5   0  662.29   23.06
  -9   5   0  629.72   21.87
   8  -5   0   18.87    4.19
  -8   5   0   18.66    4.08
   7  -5   0  866.51   29.26
  -7   5   0  919.25   31.02
   6  -5   0 1353.54   44.98
  -6   5   0 1333.37   44.31
   5  -5   0 3107.76  101.75
  -5   5   0 2918.53   95.54
   4  -5   0  627.65   21.61
  -4   5   0  572.85   19.70
   3  -5   0 2377.74   78.02
  -3   5   0 2551.45   83.60
   2  -5   0  115.19    6.10
  -2   5   0  104.13    5.58
   1  -5   0  489.76   17.22
  -1   5   0  540.79   18.77
   0  -5   0   -0.93    3.98
   0   5   0    6.82    3.98
  -1  -5   0  508.89   17.68
   1   5   0  535.11   18.51
  -2  -5   0  103.92    5.69
   2   5   0  102.11    5.53
  -3  -5   0 2994.53   97.97
   3   5   0 2401.52   78.69
  -4  -5   0  539.76   18.77
   4   5   0  504.24   17.53
  -5  -5   0 2918.53   95.60
   5   5   0 2444.95   80.19
  -6  -5   0 1418.68   47.10
   6   5   0 1240.31   41.26
  -7  -5   0  920.28   31.23
   7   5   0  904.77   30.56
  -8  -5   0   16.96    4.45
   8   5   0    5.17    4.50
  -9  -5   0  733.64   25.44
   9   5   0  669.53   23.21
 -10  -5   0 2919.56   96.01
 -11  -5   0 3951.00  129.41
 -12  -5   0  278.26   11.32
  12   5   0  266.31   11.06
  12   5   0  260.32   10.65
 -13  -5   0   10.70    5.22
  13   5   0   14.27    5.17
  13   5   0   10.96    4.76
 -14  -5   0   66.64    6.05
  14   5   0   61.94    5.64
  14   5   0   56.10    5.17
 -15  -5   0   25.28    5.43
  15   5   0   31.07    4.65
  15   5   0   29.73    5.27
  16  -6   0   20.58    4.39
  16  -6   0   23.47    5.12
  15  -6   0   82.62    5.58
  15  -6   0   99.42    6.82
  14  -6   0  498.14   17.68
  14  -6   0  476.43   17.37
 -14   6   0  466.14   16.60
  13  -6   0  125.01    7.13
  13  -6   0  123.67    6.67
 -13   6   0  129.77    6.82
  12  -6   0  450.01   16.39
  12  -6   0  455.95   16.75
 -12   6   0  456.99   16.49
  11  -6   0  159.70    8.07
  11  -6   0  154.43    8.07
 -11   6   0  146.26    7.19
  10  -6   0  352.45   13.65
  10  -6   0  325.46   12.67
 -10   6   0  300.49   11.43
   9  -6   0 1206.19   40.53
  -9   6   0 1183.96   39.65
   8  -6   0   84.74    5.74
  -8   6   0   70.16    5.17
   7  -6   0  928.55   31.38
  -7   6   0  866.51   29.31
   6  -6   0 1557.24   51.65
  -6   6   0 1360.77   45.24
   5  -6   0  351.67   12.93
  -5   6   0  360.10   13.13
   4  -6   0 4705.32  153.50
  -4   6   0 3984.09  130.08
   3  -6   0 2828.57   92.65
  -3   6   0 2800.65   91.72
   2  -6   0 3871.38  126.36
  -2   6   0 4107.14  134.06
   1  -6   0  638.51   21.87
  -1   6   0  710.37   24.14
   0  -6   0  418.68   14.94
   0   6   0  421.83   14.99
  -1  -6   0  603.35   20.84
   1   6   0  575.43   19.85
   2   6   0 4075.08  132.92
  -3  -6   0 2855.45   93.48
   3   6   0 3066.39  100.35
  -4  -6   0 4417.35  144.09
  -5  -6   0  310.05   11.68
   5   6   0  328.56   12.20
  -6  -6   0 1434.19   47.67
   6   6   0 1279.60   42.55
  -7  -6   0  813.26   27.82
   7   6   0  841.18   28.54
  -8  -6   0   73.31    5.89
   8   6   0   85.31    6.05
  -9  -6   0 1195.33   40.33
   9   6   0 1190.68   39.96
 -10  -6   0  322.36   12.77
  10   6   0  337.61   12.98
 -11  -6   0  153.76    8.17
  11   6   0  160.12    8.22
  11   6   0  158.00    7.91
 -12  -6   0  506.41   18.30
  12   6   0  477.10   17.42
  12   6   0  488.01   17.63
 -13  -6   0  130.60    7.50
  13   6   0  118.24    7.03
  13   6   0  118.91    6.77
 -14  -6   0  505.69   18.25
  14   6   0  508.33   17.94
  14   6   0  535.11   18.97
 -15  -6   0   93.22    6.41
  15   6   0   85.72    6.05
  15   6   0   87.94    5.48
  15  -7   0  387.50   14.11
  15  -7   0  356.89   13.65
 -15   7   0  358.91   13.03
  14  -7   0    5.07    5.22
  14  -7   0    3.72    4.50
 -14   7   0    0.93    4.19
  13  -7   0  185.19    8.63
  13  -7   0  191.55    8.63
 -13   7   0  187.62    8.32
  12  -7   0  923.38   31.49
  12  -7   0 1025.23   34.69
 -12   7   0  994.73   33.66
  11  -7   0 2312.07   76.31
  11  -7   0 2317.24   76.47
 -11   7   0 2254.17   74.29
  10  -7   0  798.27   27.51
 -10   7   0  726.40   25.08
   9  -7   0   26.47    4.81
  -9   7   0   21.71    4.24
   8  -7   0    1.60    4.45
  -8   7   0    2.43    3.93
   7  -7   0  778.62   26.68
  -7   7   0  702.10   24.14
   6  -7   0 4816.99  157.17
  -6   7   0 4650.52  151.74
   5  -7   0  908.39   30.61
  -5   7   0  875.82   29.52
   4  -7   0 3639.24  119.02
  -4   7   0 3935.49  128.53
   3  -7   0 2754.64   90.32
  -3   7   0 2786.69   91.25
   2  -7   0 4632.94  151.07
   0  -7   0    2.48    4.03
   0   7   0   -2.27    3.62
  -1  -7   0 5242.50  170.82
   1   7   0 4494.90  146.57
  -2  -7   0 4874.90  158.93
   2   7   0 4110.76  134.11
  -3  -7   0 2660.02   87.22
   3   7   0 2454.77   80.50
  -4  -7   0 4643.80  151.79
   4   7   0 3849.67  125.79
  -5  -7   0  716.58   24.56
   5   7   0  843.25   28.54
  -6  -7   0 4949.35  161.46
   6   7   0 4664.48  152.16
  -7  -7   0  761.56   26.21
   7   7   0  689.69   23.78
  -8  -7   0    3.57    4.81
   8   7   0    2.17    4.45
  -9  -7   0   25.85    5.38
   9   7   0   17.73    5.27
 -10  -7   0  705.72   24.61
  10   7   0  675.22   23.73
 -11  -7   0 2384.97   78.74
 -12  -7   0 1005.59   34.23
  12   7   0 1016.44   34.54
  12   7   0 1034.54   35.05
 -13  -7   0  203.55    9.20
  13   7   0  188.35    8.89
  13   7   0  186.90    8.32
 -14  -7   0    5.38    4.76
  14   7   0    3.15    4.96
  14   7   0    7.96    4.19
 -15  -7   0  386.98   14.42
  15   7   0  342.73   12.93
  15   7   0  312.43   11.84
  15  -8   0  134.22    6.67
  15  -8   0  122.53    6.93
 -15   8   0  121.08    6.36
  14  -8   0  139.85    7.03
  14  -8   0  126.67    7.34
 -14   8   0  126.25    6.36
  13  -8   0 1064.53   35.78
  13  -8   0 1058.32   35.78
 -13   8   0  984.91   33.24
  12  -8   0   10.19    5.27
  12  -8   0    4.96    4.81
 -12   8   0    8.84    4.45
  11  -8   0  415.06   15.51
  11  -8   0  384.66   14.48
 -11   8   0  392.83   14.53
  10  -8   0 2690.01   88.51
 -10   8   0 2621.25   86.13
   9  -8   0 3771.60  123.57
  -9   8   0 3673.37  120.21
   8  -8   0 3194.10  104.80
  -8   8   0 3223.05  105.57
   7  -8   0 2623.83   86.29
  -7   8   0 2651.75   87.06
   6  -8   0   25.64    4.14
  -6   8   0   27.40    4.19
   5  -8   0 1872.62   61.78
  -5   8   0 1811.09   59.82
   4  -8   0  861.86   29.21
  -4   8   0  718.13   24.56
   3  -8   0  556.30   19.44
  -3   8   0  490.18   17.32
   2  -8   0   44.31    4.86
  -2   8   0   40.53    4.50
   1  -8   0  578.02   20.16
  -1   8   0  593.53   20.58
  -1  -8   0  655.05   22.65
   1   8   0  528.39   18.35
  -2  -8   0   33.04    4.81
   2   8   0   47.10    4.50
  -3  -8   0  492.04   17.47
   3   8   0  462.36   16.34
  -4  -8   0  932.69   31.43
   4   8   0  760.52   25.85
  -5  -8   0 1725.78   57.08
   5   8   0 1967.23   64.78
  -6  -8   0   27.76    4.65
   6   8   0   30.04    4.76
  -7  -8   0 2919.05   95.85
   7   8   0 2668.30   87.69
  -8  -8   0 3411.24  111.83
   8   8   0 3141.36  102.99
  -9  -8   0 3634.59  119.07
   9   8   0 3732.82  122.22
 -10  -8   0 2554.04   84.12
  10   8   0 2289.84   75.64
 -11  -8   0  406.16   15.30
  11   8   0  393.60   14.73
 -12  -8   0   10.19    4.81
  12   8   0   -1.29    4.14
  12   8   0    6.72    4.76
 -13  -8   0 1028.85   34.90
  13   8   0  937.34   31.69
  13   8   0  977.15   32.88
 -14  -8   0  124.08    6.77
  14   8   0  117.98    6.10
  14   8   0  115.76    6.62
  15  -9   0  493.90   17.73
  15  -9   0  476.84   16.70
 -15   9   0  510.86   17.84
  14  -9   0  213.27    8.89
  14  -9   0  198.38    9.05
 -14   9   0  213.73    8.94
  13  -9   0   38.00    5.69
  13  -9   0   32.00    4.81
 -13   9   0   31.69    4.08
  12  -9   0  200.96    9.15
  12  -9   0  186.23    8.32
 -12   9   0  198.43    8.53
  11  -9   0    9.25    4.50
 -11   9   0   13.91    4.65
  10  -9   0    8.58    4.55
 -10   9   0    1.60    4.50
   9  -9   0   92.44    6.10
  -9   9   0   93.11    5.89
   8  -9   0  751.22   25.95
  -8   9   0  659.71   22.90
   7  -9   0 2405.14   79.31
  -7   9   0 2165.24   71.35
   6  -9   0  256.18   10.24
  -6   9   0  242.32    9.77
   5  -9   0  702.10   24.25
  -5   9   0  815.84   27.82
   4  -9   0   60.70    5.12
  -4   9   0   52.63    4.91
   3  -9   0  970.43   32.68
  -3   9   0  951.82   32.16
   2  -9   0  334.92   12.56
  -2   9   0  310.26   11.74
   1  -9   0 2166.28   71.30
  -1   9   0 2153.87   70.88
   0  -9   0    1.91    4.24
   0   9   0    4.50    3.62
  -1  -9   0 2158.01   70.99
   1   9   0 2220.56   73.00
  -2  -9   0  264.55   10.44
   2   9   0  326.29   12.20
  -3  -9   0  974.05   32.78
   3   9   0  843.25   28.54
  -4  -9   0   52.17    4.76
   4   9   0   63.80    5.12
  -6  -9   0  186.18    8.43
   6   9   0  217.14    9.31
  -7  -9   0 2119.75   70.00
   7   9   0 1952.75   64.52
  -8  -9   0  674.70   23.58
   8   9   0  670.05   23.42
  -9  -9   0  107.54    6.67
   9   9   0  102.99    6.46
 -10  -9   0   -6.98    4.91
  10   9   0   -1.86    4.76
 -11  -9   0   11.27    4.70
  11   9   0    4.50    4.81
 -12  -9   0  201.32    9.00
  12   9   0  203.70    8.79
 -13  -9   0   29.73    5.33
  13   9   0   26.26    4.65
  13   9   0   34.48    4.60
 -14  -9   0  219.94    9.20
  14   9   0  199.62    8.22
  14   9   0  208.36    8.94
  14 -10   0    6.98    4.86
  14 -10   0    6.77    4.08
 -14  10   0   11.74    4.34
  13 -10   0   41.36    5.58
  13 -10   0   32.42    4.55
 -13  10   0   28.95    4.45
  12 -10   0  106.14    6.10
  12 -10   0  115.04    6.57
 -12  10   0  119.89    6.36
  11 -10   0  103.87    6.15
 -11  10   0  102.58    6.26
  10 -10   0  399.13   14.89
 -10  10   0  384.29   14.22
   9 -10   0  840.66   28.75
  -9  10   0  834.46   28.49
   8 -10   0 1743.36   57.85
  -8  10   0 1863.31   61.63
   7 -10   0 1551.03   51.70
  -7  10   0 1441.43   47.98
   6 -10   0   76.10    5.79
  -6  10   0   62.97    5.17
   5 -10   0  179.04    8.32
  -5  10   0  168.03    7.70
   4 -10   0    1.14    4.29
  -4  10   0   -0.98    4.24
   3 -10   0 1269.26   42.45
  -3  10   0 1182.92   39.60
   2 -10   0 1788.34   59.20
  -2  10   0 1978.60   65.25
   1 -10   0 2087.69   68.76
  -1  10   0 2108.89   69.49
   0 -10   0  471.31   16.80
   0  10   0  473.27   16.91
  -1 -10   0 2213.84   72.90
   1  10   0 1973.43   65.09
  -2 -10   0 2215.91   73.00
   2  10   0 1990.49   65.61
  -3 -10   0 1056.77   35.67
   3  10   0 1099.68   36.91
  -4 -10   0    6.26    4.39
   4  10   0    0.62    4.29
  -5 -10   0  148.28    7.55
   5  10   0  184.31    8.27
  -6 -10   0   71.24    5.79
   6  10   0   69.33    5.48
  -7 -10   0 1381.45   46.17
   7  10   0 1266.68   42.50
  -8 -10   0 1801.78   59.66
   8  10   0 1658.57   55.06
  -9 -10   0  795.68   27.40
   9  10   0  803.95   27.66
 -10 -10   0  425.76   15.92
  10  10   0  407.40   15.05
 -11 -10   0  105.26    6.72
  11  10   0   95.91    6.00
 -12 -10   0  110.69    6.67
  12  10   0  106.61    6.26
 -13 -10   0   37.07    5.33
  13  10   0   31.28    4.29
  13  10   0   28.80    5.07
 -14  11   0  132.61    6.67
 -13  11   0  265.33   10.44
  12 -11   0   10.96    4.29
 -12  11   0   14.84    3.83
  11 -11   0  623.00   21.66
 -11  11   0  591.98   20.68
  10 -11   0  138.30    7.19
 -10  11   0  121.70    6.72
   9 -11   0    0.47    4.60
  -9  11   0    1.09    4.65
   8 -11   0 1650.30   54.91
  -8  11   0 1569.65   52.17
   7 -11   0 4531.09  148.18
  -7  11   0 4177.45  136.54
   6 -11   0 2724.65   89.65
  -6  11   0 2580.92   84.84
   5 -11   0 1822.47   60.34
  -5  11   0 1785.24   59.04
   4 -11   0  205.93    9.00
  -4  11   0  203.19    8.58
   3 -11   0 1059.36   35.78
  -3  11   0  956.47   32.26
   2 -11   0  137.53    7.08
  -2  11   0  148.43    7.08
   1 -11   0  258.61   10.65
  -1  11   0  266.67   10.55
   0 -11   0    2.64    4.65
   0  11   0   -1.09    4.24
  -1 -11   0  272.36   11.01
   1  11   0  264.24   10.50
  -2 -11   0  117.41    6.72
   2  11   0  162.03    7.60
  -3 -11   0  840.14   28.75
   3  11   0  928.55   31.38
  -4 -11   0  193.72    8.58
   4  11   0  205.77    8.84
  -5 -11   0 1569.65   52.22
   5  11   0 1634.79   54.13
  -7 -11   0 4089.04  133.75
   7  11   0 4045.10  132.30
  -8 -11   0 1273.92   42.71
   8  11   0 1421.26   47.41
  -9 -11   0   -5.17    4.60
   9  11   0    3.05    4.45
 -10 -11   0  147.30    7.44
  10  11   0  111.52    6.46
 -11 -11   0  585.77   20.58
  11  11   0  566.13   19.85
 -12 -11   0   12.62    5.02
  12  11   0   15.20    4.45
  13 -12   0  217.40    9.56
  13 -12   0  187.16    7.91
 -13  12   0  187.47    8.07
  12 -12   0  309.64   11.79
 -12  12   0  288.70   11.17
  11 -12   0  442.10   15.87
 -11  12   0  453.63   16.23
  10 -12   0  254.47   10.50
 -10  12   0  230.95    9.56
   9 -12   0 1039.71   35.05
  -9  12   0 1056.25   35.57
   8 -12   0  612.14   21.56
  -8  12   0  593.01   20.89
   7 -12   0    0.16    4.55
  -7  12   0    4.55    4.03
   6 -12   0 1419.71   47.51
  -6  12   0 1370.08   45.70
   5 -12   0 4134.54  135.25
  -5  12   0 3892.06  127.29
   4 -12   0 3255.10  106.76
  -4  12   0 3272.17  107.23
   3 -12   0 1106.40   37.22
  -3  12   0 1126.57   37.85
   2 -12   0   83.14    6.15
  -2  12   0   83.76    5.69
   1 -12   0   46.17    5.58
  -1  12   0   42.76    4.60
   0 -12   0  618.86   21.71
   0  12   0  485.47   17.32
  -1 -12   0   43.58    5.33
   1  12   0   33.40    4.70
  -2 -12   0   72.38    5.95
   2  12   0   79.57    5.58
  -3 -12   0 1066.08   35.98
   3  12   0  807.05   27.56
  -4 -12   0 3308.87  108.47
   4  12   0 3194.61  104.64
  -5 -12   0 2815.13   92.49
   5  12   0 3702.84  121.08
  -6 -12   0 1355.60   45.24
   6  12   0 1372.15   45.70
  -7 -12   0    0.62    4.96
   7  12   0    6.57    4.60
  -8 -12   0  543.90   19.34
   8  12   0  577.50   20.27
  -9 -12   0  953.89   32.26
   9  12   0  932.69   31.54
 -10 -12   0  247.75   10.24
  10  12   0  230.07    9.36
 -11 -12   0  436.20   15.82
  11  12   0  382.90   13.96
 -12 -12   0  273.91   10.75
  12  12   0  240.41    9.51
  12 -13   0   19.13    4.34
 -12  13   0   18.51    4.24
  11 -13   0    8.94    4.45
 -11  13   0   10.24    4.29
  10 -13   0  380.21   14.06
 -10  13   0  363.82   13.49
   9 -13   0   41.57    4.96
  -9  13   0   34.74    4.96
   8 -13   0   75.74    6.00
  -8  13   0   68.14    5.64
   7 -13   0  134.01    7.24
  -7  13   0  130.55    7.08
   6 -13   0   53.61    5.58
  -6  13   0   55.94    5.17
   5 -13   0   72.85    5.95
  -5  13   0   75.48    5.43
   4 -13   0  321.68   12.77
  -4  13   0  321.74   12.36
   3 -13   0  100.51    6.41
  -3  13   0   91.82    5.95
   2 -13   0  741.91   25.70
  -2  13   0  776.03   26.63
   1 -13   0   -3.05    4.91
  -1  13   0    3.21    4.34
   0 -13   0   -3.52    4.81
   0  13   0   -7.24    4.39
  -1 -13   0    3.00    4.86
   1  13   0   -0.57    4.29
  -2 -13   0  733.12   25.44
   2  13   0  694.35   23.94
  -3 -13   0   99.47    6.41
   3  13   0   88.67    5.74
  -4 -13   0  296.92   11.63
   4  13   0  307.83   11.89
  -5 -13   0   63.33    5.69
   5  13   0   58.53    5.38
  -6 -13   0   41.00    5.17
   6  13   0   44.10    4.96
  -8 -13   0   63.80    5.38
   8  13   0   73.47    5.48
  -9 -13   0   23.83    4.60
   9  13   0   39.81    4.60
 -10 -13   0  321.27   11.89
  10  13   0  320.55   11.94
 -11 -13   0    5.38    4.50
  11  13   0    3.57    3.93
  11 -14   0   30.40    4.70
 -11  14   0   32.78    4.55
  10 -14   0  143.63    7.08
 -10  14   0  158.77    7.44
   9 -14   0   56.35    5.27
  -9  14   0   43.84    4.76
   8 -14   0   32.26    4.91
  -8  14   0   28.95    4.70
   7 -14   0    7.08    4.45
  -7  14   0    1.71    4.50
   6 -14   0  322.25   12.62
  -6  14   0  319.72   12.41
   5 -14   0  412.99   15.41
  -5  14   0  430.05   15.72
   4 -14   0  600.77   21.20
  -4  14   0  586.29   20.63
   3 -14   0  743.98   25.75
  -3  14   0  760.01   26.11
   2 -14   0   82.52    6.20
  -2  14   0   79.67    5.64
   1 -14   0  225.31    9.72
  -1  14   0  196.21    8.69
   0 -14   0   10.08    4.86
   0  14   0   -3.83    4.45
  -1 -14   0  207.58    9.46
   1  14   0  197.76    8.63
  -2 -14   0   90.12    6.36
   2  14   0   77.45    5.53
  -3 -14   0  771.38   26.57
   3  14   0  759.49   26.01
  -4 -14   0  588.36   20.73
   4  14   0  589.39   20.63
  -5 -14   0  334.20   12.98
   5  14   0  413.82   15.05
  -6 -14   0  296.20   11.58
   6  14   0  281.46   11.06
  -7 -14   0    5.33    4.50
   7  14   0    1.71    4.24
  -8 -14   0   29.16    4.86
   8  14   0   25.54    4.45
  -9 -14   0   38.98    4.76
   9  14   0   44.05    4.39
 -10 -14   0  133.70    6.57
  10  14   0  123.41    6.10
  10 -15   0  321.27   12.05
 -10  15   0  346.24   12.77
   9 -15   0  184.83    8.22
  -9  15   0  153.40    7.34
   8 -15   0    3.15    4.55
  -8  15   0    3.72    3.88
   7 -15   0  348.72   13.18
  -7  15   0  338.64   12.72
   6 -15   0  338.64   12.98
  -6  15   0  351.67   13.24
   5 -15   0   14.89    4.70
  -5  15   0   15.41    4.60
   4 -15   0   65.71    5.64
  -4  15   0   70.06    5.69
   3 -15   0  548.03   19.49
  -3  15   0  478.80   17.37
   2 -15   0 2358.61   77.71
  -2  15   0 2086.66   68.81
   1 -15   0  397.06   14.94
  -1  15   0  390.09   14.42
   0 -15   0    2.27    5.07
   0  15   0    1.76    4.39
  -1 -15   0  460.61   16.85
   1  15   0  379.90   14.22
  -2 -15   0 2167.83   71.61
   2  15   0 2177.13   71.76
  -3 -15   0  512.00   18.35
   3  15   0  535.11   18.87
  -4 -15   0   68.19    5.58
   4  15   0   74.04    5.58
  -5 -15   0    5.27    4.55
   5  15   0   13.34    4.29
  -6 -15   0  380.73   13.96
   6  15   0  371.16   13.39
  -7 -15   0  294.64   11.17
   7  15   0  291.44   10.91
  -8 -15   0    4.45    4.39
   9  15   0  136.28    6.51
  -9  16   0  121.50    6.20
   8 -16   0  574.40   20.01
  -8  16   0  567.68   19.75
   7 -16   0  155.98    7.34
  -7  16   0  139.39    6.93
   6 -16   0  137.89    7.08
  -6  16   0  125.27    6.31
   5 -16   0  207.11    8.94
  -5  16   0  168.34    7.70
   4 -16   0  442.56   15.98
  -4  16   0  381.66   14.17
   3 -16   0   86.70    6.15
  -3  16   0   73.88    5.58
   2 -16   0  218.54    9.41
  -2  16   0  219.06    9.31
   1 -16   0  919.76   31.28
  -1  16   0  877.37   29.83
   0 -16   0 3447.43  112.92
   0  16   0 3254.59  106.61
  -1 -16   0 1041.26   35.16
   1  16   0  929.07   31.43
  -2 -16   0  257.99   10.44
   2  16   0  210.53    9.00
  -3 -16   0   75.02    5.79
   3  16   0   79.72    5.58
  -4 -16   0  399.80   14.73
   4  16   0  345.36   12.72
  -5 -16   0  184.47    8.07
   5  16   0  178.94    7.81
  -6 -16   0  121.86    6.05
   6  16   0  130.08    6.31
  -7 -16   0  134.63    6.41
   7  16   0  121.76    5.95
   7 -17   0   13.29    4.45
  -7  17   0    1.81    4.14
   6 -17   0  135.92    6.88
  -6  17   0  132.35    6.57
   5 -17   0  164.15    7.60
  -5  17   0  197.29    8.48
   4 -17   0   20.99    4.81
  -4  17   0   16.23    4.65
   3 -17   0   26.26    4.86
  -3  17   0   28.23    4.65
   2 -17   0  145.38    7.24
  -2  17   0  128.79    6.72
   1 -17   0   80.86    5.74
  -1  17   0   61.42    5.17
   0 -17   0    0.57    4.70
   0  17   0    1.81    4.08
  -1 -17   0   83.39    5.74
   1  17   0   67.68    5.17
  -2 -17   0  154.64    7.29
   2  17   0  110.90    6.10
  -3 -17   0   19.75    4.65
   3  17   0   19.44    4.24
  -4 -17   0   13.60    4.24
   4  17   0   21.82    4.19
  -5 -17   0  154.43    6.88
   5  17   0  169.94    7.24
   4 -18   0   84.48    5.27
  -4  18   0   75.48    5.33
   3 -18   0    2.43    4.39
  -3  18   0    0.88    4.03
   2 -18   0  122.48    6.51
  -2  18   0  128.99    6.51
   1 -18   0   24.51    4.60
  -1  18   0   17.99    4.03
   0 -18   0  834.46   28.18
   0  18   0  992.14   33.24
  -1 -18   0   22.54    4.24
   1  18   0   14.68    3.93
  -2 -18   0  139.44    6.82
   2  18   0  127.24    6.10
   1  18   1  180.59    7.60
  -1 -18  -1  164.41    7.19
   0  18   1    0.36    3.77
   0 -18  -1    7.86    4.45
  -1  18   1    6.05    3.93
   1 -18  -1    2.38    4.29
  -2  18   1   70.57    5.12
   2 -18  -1   72.80    5.33
  -3  18   1  255.61    9.87
   3 -18  -1  271.64   10.60
   4  17   1   33.40    4.03
  -4 -17  -1   34.23    4.24
   3  17   1  112.86    5.84
  -3 -17  -1   94.20    5.53
   2  17   1  532.00   18.46
  -2 -17  -1  542.34   18.87
   1  17   1  646.26   22.13
  -1 -17  -1  704.69   24.09
   0  17   1 1400.58   46.43
   0 -17  -1 1445.05   47.93
  -1  17   1    9.87    4.19
   1 -17  -1    7.81    4.45
  -2  17   1  979.74   32.93
   2 -17  -1 1133.29   37.95
  -3  17   1  316.41   11.99
   3 -17  -1  306.54   11.74
  -4  17   1  327.99   12.36
   4 -17  -1  310.31   11.89
  -5  17   1   91.51    5.64
   5 -17  -1  112.35    6.36
  -6  17   1   12.72    4.19
   6 -17  -1   12.72    4.34
  -7  17   1  217.40    8.89
   7 -17  -1  226.24    9.25
   5  16   1    8.69    4.08
  -5 -16  -1   18.87    4.19
   4  16   1    1.24    3.83
  -4 -16  -1    6.88    4.19
   3  16   1    9.82    4.03
  -3 -16  -1    4.96    4.24
   2  16   1   16.60    4.29
  -2 -16  -1   22.13    4.34
   1  16   1  224.95    9.36
  -1 -16  -1  221.38    9.36
   0  16   1 1274.95   42.55
   0 -16  -1 1304.42   43.53
  -1  16   1  898.57   30.40
   1 -16  -1  936.82   31.74
  -2  16   1  338.95   12.82
   2 -16  -1  379.49   14.22
  -3  16   1  315.12   12.15
   3 -16  -1  359.27   13.55
  -4  16   1  222.63    9.36
   4 -16  -1  195.28    8.84
  -5  16   1    1.81    4.08
   5 -16  -1    6.15    4.65
  -6  16   1   31.54    4.55
   6 -16  -1   33.76    4.81
  -7  16   1  224.02    9.25
   7 -16  -1  263.16   10.44
  -8  16   1   62.04    5.38
   8 -16  -1   44.20    4.96
  -9  16   1  454.40   16.13
   9 -16  -1  406.78   14.63
   8  15   1   35.21    4.39
  -8 -15  -1   38.57    4.50
   7  15   1    5.27    4.14
  -7 -15  -1   -4.91    3.88
   6  15   1  118.96    6.31
  -6 -15  -1  131.68    6.77
   5  15   1   78.22    5.12
  -5 -15  -1   92.39    5.95
   4  15   1   17.68    4.45
  -4 -15  -1    9.82    4.24
   3  15   1  290.92   11.27
  -3 -15  -1  329.08   12.51
   2  15   1   59.71    5.22
  -2 -15  -1   78.64    5.74
   1  15   1  293.77   11.37
  -1 -15  -1  313.00   12.20
   0  15   1  711.92   24.56
   0 -15  -1  678.84   23.63
  -1  15   1   -4.45    4.24
   1 -15  -1    3.93    5.07
  -2  15   1    4.91    4.24
   2 -15  -1    2.02    5.02
  -3  15   1  134.42    7.13
   3 -15  -1  137.94    7.44
  -4  15   1   70.47    5.43
   4 -15  -1   70.16    5.74
  -5  15   1    5.02    4.60
   5 -15  -1    2.79    4.50
  -6  15   1    2.33    4.39
   6 -15  -1    8.53    4.60
  -7  15   1  370.49   13.80
   7 -15  -1  360.41   13.49
  -8  15   1  370.59   13.55
   8 -15  -1  424.98   15.46
  -9  15   1  225.42    9.36
   9 -15  -1  227.85    9.36
 -10  15   1   -7.76    4.24
  10 -15  -1   -2.53    4.29
   9  14   1  519.60   18.15
  -9 -14  -1  591.98   20.47
   8  14   1 1502.44   49.68
  -8 -14  -1 1424.37   47.25
   7  14   1  956.47   32.16
  -7 -14  -1 1224.80   40.95
   6  14   1  135.66    6.93
  -6 -14  -1  145.90    7.29
   5  14   1    5.02    4.45
   4  14   1  246.10    9.98
  -4 -14  -1  273.96   11.01
   3  14   1  161.36    7.70
  -3 -14  -1  178.78    8.43
   2  14   1    7.86    4.14
  -2 -14  -1    7.03    4.60
   1  14   1  537.17   18.87
  -1 -14  -1  582.67   20.63
   0  14   1 4393.56  143.52
   0 -14  -1 4459.22  145.69
  -1  14   1 3403.49  111.42
   1 -14  -1 3484.66  114.21
  -2  14   1 2770.15   90.89
   2 -14  -1 2999.18   98.49
  -3  14   1  535.11   18.87
   3 -14  -1  617.31   21.71
  -4  14   1    2.59    4.50
   4 -14  -1    2.17    4.86
  -5  14   1  196.46    8.79
   5 -14  -1  200.65    9.10
  -6  14   1  227.74    9.62
   6 -14  -1  250.08   10.39
  -7  14   1   -1.76    4.60
   7 -14  -1   -3.21    4.55
  -8  14   1  196.15    8.69
   8 -14  -1  192.02    8.53
  -9  14   1 1735.09   57.34
   9 -14  -1 1849.35   61.06
 -10  14   1 1047.98   35.11
  10 -14  -1 1121.91   37.48
 -11  14   1   59.61    5.07
  11 -14  -1   65.51    5.33
  10  13   1   76.67    5.43
 -10 -13  -1   92.91    6.46
   9  13   1 1137.42   38.00
  -9 -13  -1 1155.52   38.72
   8  13   1   64.47    5.33
  -8 -13  -1   54.70    5.48
   7  13   1  701.58   24.09
  -7 -13  -1  662.29   23.06
   6  13   1 1486.92   49.37
  -6 -13  -1 1764.04   58.47
   5  13   1 1051.60   35.47
  -5 -13  -1 1044.88   35.31
   4  13   1   11.22    4.60
  -4 -13  -1   18.15    4.91
   3  13   1   19.34    4.24
  -3 -13  -1   24.51    4.91
   2  13   1 1737.68   57.44
  -2 -13  -1 1475.03   49.12
   1  13   1 1537.59   51.03
  -1 -13  -1 1525.18   50.82
   0  13   1  289.89   11.37
   0 -13  -1  313.15   12.51
  -1  13   1  120.93    6.46
   1 -13  -1  124.96    6.98
  -2  13   1   -1.91    4.19
   2 -13  -1   12.77    4.50
  -3  13   1  528.90   18.72
   3 -13  -1  633.34   22.28
  -4  13   1  746.56   25.70
   4 -13  -1  693.31   24.09
  -5  13   1   33.30    4.76
   5 -13  -1   27.09    5.07
  -6  13   1  443.23   16.08
   6 -13  -1  508.58   18.35
  -7  13   1  437.18   16.03
   7 -13  -1  417.07   15.46
  -8  13   1  940.96   32.00
   8 -13  -1  971.98   32.99
  -9  13   1  473.89   17.06
   9 -13  -1  496.28   17.84
 -10  13   1  234.52    9.56
  10 -13  -1  265.54   10.65
 -11  13   1   37.22    4.70
  11 -13  -1   49.94    4.96
 -12  13   1    3.15    4.24
  12 -13  -1    6.82    4.39
  11  12   1  360.93   13.29
 -11 -12  -1  399.18   14.79
  10  12   1  140.68    7.08
 -10 -12  -1  145.13    7.65
   9  12   1   14.79    4.70
  -9 -12  -1   12.25    4.96
   8  12   1   64.57    5.33
  -8 -12  -1   80.03    6.05
   7  12   1    1.24    4.50
  -7 -12  -1    7.60    4.70
   6  12   1  109.92    6.57
  -6 -12  -1  117.15    6.98
   5  12   1  200.19    8.94
  -5 -12  -1  260.32   10.50
   4  12   1 2319.31   76.31
  -4 -12  -1 2448.05   80.60
   3  12   1 1395.93   46.48
  -3 -12  -1 1693.21   56.15
   2  12   1  129.10    6.72
  -2 -12  -1  149.26    7.60
   1  12   1  424.31   15.30
  -1 -12  -1  469.03   16.96
   0  12   1  135.35    6.77
   0 -12  -1  115.50    6.82
  -1  12   1    2.84    3.98
   1 -12  -1    9.72    4.81
  -2  12   1   53.46    4.91
   2 -12  -1   56.92    5.43
  -3  12   1   16.85    4.34
   3 -12  -1   18.25    4.81
  -4  12   1 1157.59   38.78
   4 -12  -1 1368.53   45.70
  -5  12   1  389.46   14.42
   5 -12  -1  451.97   16.49
  -6  12   1  446.34   16.23
   6 -12  -1  422.45   15.61
  -7  12   1  799.82   27.35
   7 -12  -1  725.88   25.18
  -8  12   1  171.60    8.07
   8 -12  -1  170.72    8.01
  -9  12   1   78.53    5.84
   9 -12  -1   69.38    5.64
 -10  12   1   18.41    4.55
  10 -12  -1   25.85    4.55
 -11  12   1    4.08    4.24
  11 -12  -1    1.65    4.45
 -12  12   1   93.63    5.64
  12 -12  -1  108.93    6.05
 -13  12   1  262.02   10.03
  13 -12  -1  240.98    9.56
  12  11   1   48.34    5.22
 -12 -11  -1   55.22    5.58
  11  11   1   23.21    4.55
 -11 -11  -1   29.52    5.33
  10  11   1    4.60    4.45
 -10 -11  -1   -0.31    5.12
   9  11   1  144.81    7.39
  -9 -11  -1  136.70    7.55
   8  11   1   25.54    5.22
  -8 -11  -1   23.63    5.17
   7  11   1  935.79   31.80
  -7 -11  -1  821.53   28.18
   6  11   1  165.96    8.01
  -6 -11  -1  135.56    7.24
   5  11   1   21.51    4.76
  -5 -11  -1   35.11    5.17
   4  11   1  141.30    7.29
  -4 -11  -1  121.96    6.98
   3  11   1  246.20   10.08
  -3 -11  -1  257.99   10.50
   2  11   1 1141.04   38.16
  -2 -11  -1 1296.15   43.38
   1  11   1   89.24    5.48
  -1 -11  -1  127.44    7.03
   0  11   1  104.38    6.00
   0 -11  -1  114.57    6.57
  -1  11   1  225.47    9.25
   1 -11  -1  182.76    8.43
  -2  11   1 1221.18   40.90
   2 -11  -1 1320.96   44.20
  -3  11   1 1415.58   47.05
   3 -11  -1 1297.18   43.43
  -4  11   1  401.41   14.63
   4 -11  -1  392.41   14.58
  -5  11   1  246.92   10.03
   5 -11  -1  279.08   11.17
  -6  11   1  175.27    8.12
   6 -11  -1  192.90    8.63
  -7  11   1  210.89    9.05
   7 -11  -1  203.34    9.05
  -8  11   1  369.04   13.65
   8 -11  -1  376.54   14.17
  -9  11   1  245.94   10.19
   9 -11  -1  236.95    9.98
 -10  11   1  396.91   14.79
  10 -11  -1  375.87   14.06
 -11  11   1   35.88    4.86
  11 -11  -1   38.31    4.96
 -12  11   1   65.92    5.17
  12 -11  -1   68.97    5.48
 -13  11   1    2.43    4.24
  13 -11  -1    2.27    4.60
  13 -11  -1    2.48    4.24
 -14  11   1    5.89    4.03
  14 -11  -1    2.74    4.19
  14 -11  -1    5.27    5.17
  13  10   1  150.71    7.13
  13  10   1  165.60    7.76
 -13 -10  -1  170.72    8.27
  12  10   1  765.69   26.21
 -12 -10  -1  805.50   27.61
  11  10   1  617.83   21.56
 -11 -10  -1  772.41   26.52
  10  10   1   -6.57    4.60
 -10 -10  -1    5.48    4.86
   9  10   1   71.86    5.89
  -9 -10  -1   68.04    5.74
   8  10   1  858.76   29.47
  -8 -10  -1  885.64   30.35
   7  10   1 1626.00   54.08
  -7 -10  -1 1475.03   49.22
   6  10   1  518.56   18.46
  -6 -10  -1  548.03   19.54
   5  10   1  873.23   29.73
  -5 -10  -1  869.61   29.73
   4  10   1 5330.39  173.92
  -4 -10  -1 6059.37  197.55
   3  10   1 4486.62  146.52
  -3 -10  -1 5919.78  193.00
   2  10   1 1612.56   53.36
  -2 -10  -1 1454.87   48.39
   1  10   1   71.40    4.96
  -1 -10  -1   72.54    5.48
   0  10   1  231.57    9.41
   0 -10  -1  223.92    9.36
  -1  10   1  493.80   17.47
   1 -10  -1  568.71   19.96
  -2  10   1 1008.17   33.92
   2 -10  -1 1074.87   36.09
  -3  10   1   18.77    4.24
   3 -10  -1   13.39    4.50
  -4  10   1 1829.19   60.44
   4 -10  -1 1957.41   64.68
  -5  10   1 2317.76   76.31
   5 -10  -1 2619.18   86.13
  -6  10   1 2340.51   76.98
   6 -10  -1 2267.61   74.81
  -7  10   1  470.02   16.85
   7 -10  -1  507.24   18.25
  -8  10   1   -1.40    4.50
   8 -10  -1    3.72    4.50
  -9  10   1    2.07    4.50
   9 -10  -1    1.29    4.55
 -10  10   1   96.47    6.05
  10 -10  -1   96.16    6.15
 -11  10   1   69.64    5.64
  11 -10  -1   69.80    5.53
 -12  10   1  131.37    6.72
  12 -10  -1  131.79    7.08
 -13  10   1 1007.66   33.86
  13 -10  -1 1032.47   34.69
  13 -10  -1  993.18   33.71
 -14  10   1  576.98   20.01
  14 -10  -1  571.81   19.90
  14 -10  -1  589.91   20.78
  13   9   1  413.40   15.05
  13   9   1  426.43   15.30
 -13  -9  -1  455.95   16.60
  12   9   1  109.66    6.10
  12   9   1   98.13    6.20
 -12  -9  -1  112.50    6.93
  11   9   1 1692.18   56.10
 -11  -9  -1 1566.03   52.11
  10   9   1 2042.71   67.52
 -10  -9  -1 2026.17   67.00
   9   9   1  720.71   25.02
  -9  -9  -1  770.86   26.78
   8   9   1    7.44    4.86
  -8  -9  -1    9.87    4.86
   7   9   1   38.16    5.02
  -7  -9  -1   36.97    5.38
   6   9   1 2651.75   87.17
  -6  -9  -1 2831.67   93.11
   5   9   1 3000.73   98.39
  -5  -9  -1 2762.91   90.79
   4   9   1    4.14    4.24
  -4  -9  -1    4.81    4.50
   3   9   1   39.65    4.34
  -3  -9  -1   39.14    4.76
   1   9   1 2554.55   83.81
  -1  -9  -1 2288.29   75.28
   0   9   1  328.20   12.15
   0  -9  -1  330.73   12.30
  -1   9   1  437.13   15.61
   1  -9  -1  566.13   19.75
  -2   9   1  697.97   23.89
   2  -9  -1  698.48   23.94
  -3   9   1 3461.39  113.23
   3  -9  -1 4058.02  132.56
  -4   9   1 1346.30   44.88
   4  -9  -1 1492.09   49.53
  -5   9   1  316.20   12.15
   5  -9  -1  350.07   13.13
  -6   9   1  635.41   22.02
   6  -9  -1  696.93   24.04
  -7   9   1  180.08    7.91
   7  -9  -1  179.92    8.32
  -8   9   1  146.52    7.29
   8  -9  -1  167.51    8.01
  -9   9   1  437.18   16.03
   9  -9  -1  472.55   17.16
 -10   9   1  137.78    7.13
  10  -9  -1  147.14    7.60
 -11   9   1  786.37   26.88
  11  -9  -1  807.05   27.66
 -12   9   1 1196.88   40.12
  12  -9  -1 1220.15   40.84
 -13   9   1  996.80   33.55
  13  -9  -1 1038.16   34.95
  13  -9  -1 1148.80   38.72
 -14   9   1   21.09    4.24
  14  -9  -1   14.53    4.39
  14  -9  -1   17.11    5.43
 -15   9   1   45.91    4.76
  15  -9  -1   41.15    4.91
  15  -9  -1   50.41    5.48
  14   8   1   35.21    4.76
  14   8   1   42.65    4.60
 -14  -8  -1   21.82    5.17
  13   8   1  -10.96    4.86
  13   8   1    1.14    4.24
 -13  -8  -1    1.09    4.91
  12   8   1   32.21    4.81
  12   8   1   29.62    4.70
 -12  -8  -1   49.74    5.53
  11   8   1   -1.50    4.81
 -11  -8  -1    6.57    4.86
  10   8   1  338.59   13.18
 -10  -8  -1  341.33   13.24
   9   8   1  425.09   15.82
  -9  -8  -1  504.76   18.35
   8   8   1 1598.08   53.15
  -8  -8  -1 1637.38   54.54
   7   8   1  936.82   31.80
  -7  -8  -1 1022.13   34.74
   6   8   1  416.19   15.36
  -6  -8  -1  403.11   14.99
   5   8   1  549.58   19.34
  -5  -8  -1  567.68   20.01
   4   8   1   73.21    5.17
  -4  -8  -1   75.02    5.64
   3   8   1   84.01    5.38
  -3  -8  -1   88.77    5.43
   2   8   1  462.98   16.34
  -2  -8  -1  345.57   12.82
   1   8   1  869.61   29.31
  -1  -8  -1  807.57   27.51
   0   8   1  380.26   13.75
   0  -8  -1  398.36   14.63
  -1   8   1  279.96   10.60
   1  -8  -1  271.79   10.75
  -2   8   1 2552.49   83.70
   2  -8  -1 2624.87   86.08
  -3   8   1 1407.82   46.74
   3  -8  -1 1403.69   46.63
  -4   8   1   16.80    4.29
   4  -8  -1   12.46    4.03
  -5   8   1  490.80   17.42
   5  -8  -1  526.83   18.51
  -6   8   1   68.09    5.17
   6  -8  -1   73.11    5.22
  -7   8   1 1894.85   62.61
   7  -8  -1 1836.42   60.75
  -8   8   1   36.29    4.86
   8  -8  -1   34.17    4.86
  -9   8   1  129.87    6.88
   9  -8  -1  136.96    7.19
 -10   8   1  547.00   19.44
  10  -8  -1  589.91   20.78
 -11   8   1    9.41    4.50
  11  -8  -1    0.36    5.02
 -12   8   1  107.85    6.57
  12  -8  -1   96.37    6.62
  12  -8  -1  112.55    6.62
 -13   8   1   16.13    4.60
  13  -8  -1   10.03    5.17
  13  -8  -1    8.07    4.76
 -14   8   1  106.66    6.10
  14  -8  -1  135.61    7.55
  14  -8  -1  123.57    6.62
 -15   8   1   -4.60    3.77
  15  -8  -1    8.48    5.12
  15  -8  -1   11.99    4.24
 -14  -7  -1  108.21    6.62
  13   7   1    5.58    4.96
  13   7   1   15.51    4.45
 -13  -7  -1   12.72    5.22
  12   7   1  376.38   13.96
  12   7   1  380.73   14.32
 -12  -7  -1  358.13   13.70
  11   7   1 1372.67   45.91
  11   7   1 1353.54   45.34
 -11  -7  -1 1442.98   48.29
  10   7   1  742.43   25.75
 -10  -7  -1  839.63   29.06
   9   7   1 1022.65   34.64
  -9  -7  -1 1174.13   39.65
   8   7   1   46.74    5.27
  -8  -7  -1   56.10    5.58
   7   7   1  709.86   24.56
  -7  -7  -1  894.95   30.50
   6   7   1 1211.87   40.53
  -6  -7  -1 1236.17   41.41
   5   7   1 4465.43  145.75
  -5  -7  -1 4409.07  144.04
   4   7   1 3571.00  116.74
  -4  -7  -1 3480.00  113.90
   3   7   1  144.76    6.88
  -3  -7  -1  157.64    7.39
   2   7   1 6100.73  198.58
   0   7   1   35.26    4.19
   0  -7  -1   32.36    4.39
  -1   7   1  296.25   11.17
   1  -7  -1  347.90   12.77
  -2   7   1  428.45   15.20
   2  -7  -1  453.37   16.08
  -3   7   1 2531.80   83.08
   3  -7  -1 2425.30   79.62
  -4   7   1  219.99    9.10
   4  -7  -1  220.61    9.10
  -5   7   1 1339.58   44.51
   5  -7  -1 1246.00   41.57
  -6   7   1  303.69   11.53
   6  -7  -1  290.97   11.06
  -7   7   1   36.09    4.60
   7  -7  -1   36.76    4.60
  -8   7   1  762.59   26.11
   8  -7  -1  785.34   26.88
  -9   7   1  347.17   12.93
   9  -7  -1  363.15   13.65
 -10   7   1  712.44   24.56
  10  -7  -1  652.47   22.85
 -11   7   1  638.51   22.18
  11  -7  -1  655.05   22.85
  11  -7  -1  599.73   21.30
 -12   7   1 1707.17   56.61
  12  -7  -1 1855.55   61.58
  12  -7  -1 1789.89   59.46
 -13   7   1  936.82   31.80
  13  -7  -1  948.72   32.26
  13  -7  -1  974.57   32.99
 -14   7   1  141.71    6.93
  14  -7  -1  146.52    7.50
  14  -7  -1  146.99    7.96
 -15   7   1   13.55    4.29
  15  -7  -1   21.92    4.55
  15  -7  -1   26.21    5.58
 -16   7   1   11.68    4.19
  16  -7  -1    6.05    5.02
  16  -7  -1    7.08    4.45
  15   6   1  189.12    8.12
  15   6   1  168.86    8.01
 -15  -6  -1  184.52    8.53
  14   6   1    9.05    4.91
  14   6   1   16.75    4.45
 -14  -6  -1   16.08    5.27
  13   6   1  113.38    6.46
  13   6   1  119.17    6.88
 -13  -6  -1  131.06    7.34
  12   6   1 1348.37   45.08
  12   6   1 1287.36   43.12
 -12  -6  -1 1317.34   44.15
  11   6   1   96.99    6.72
  11   6   1  117.57    6.82
 -11  -6  -1  105.06    6.93
  10   6   1  330.11   12.77
 -10  -6  -1  349.55   13.65
   9   6   1  933.72   31.74
  -9  -6  -1  934.24   31.85
   8   6   1 3887.41  127.18
  -8  -6  -1 3770.56  123.46
   7   6   1 3708.01  121.29
  -7  -6  -1 3628.90  118.81
   6   6   1  112.35    6.10
  -6  -6  -1  109.71    6.51
   5   6   1   53.87    4.81
  -5  -6  -1   63.44    5.27
  -4  -6  -1 5464.81  178.06
   2   6   1 3204.44  104.75
  -2  -6  -1 3238.04  105.83
   1   6   1  927.00   31.02
  -1  -6  -1  919.76   30.87
   0   6   1 2560.24   83.86
   0  -6  -1 2407.20   78.90
  -1   6   1 1316.83   43.58
   1  -6  -1 1486.41   49.17
  -2   6   1 4290.68  139.90
   2  -6  -1 4138.16  134.99
  -3   6   1 1535.52   50.82
   3  -6  -1 1573.78   52.06
  -4   6   1  675.73   23.11
   4  -6  -1  658.16   22.65
  -5   6   1  870.13   29.37
   5  -6  -1  855.65   28.95
  -6   6   1   79.31    5.38
   6  -6  -1   79.36    5.48
  -7   6   1  191.71    8.27
   7  -6  -1  191.29    8.07
  -8   6   1  401.92   14.68
   8  -6  -1  439.51   16.03
  -9   6   1 2848.73   93.48
   9  -6  -1 3007.97   98.75
 -10   6   1 1234.62   41.31
  10  -6  -1 1292.01   43.22
 -11   6   1  738.29   25.44
  11  -6  -1  849.97   29.21
  11  -6  -1  755.87   26.11
 -12   6   1  261.92   10.55
  12  -6  -1  298.06   12.15
  12  -6  -1  256.70   10.70
 -13   6   1  941.48   31.90
  13  -6  -1  985.94   33.45
  13  -6  -1  979.74   33.30
 -14   6   1  304.93   11.79
  14  -6  -1  324.99   12.67
  14  -6  -1  304.42   11.84
 -15   6   1  175.99    7.86
  15  -6  -1  196.26    9.25
  15  -6  -1  195.17    8.48
  16  -6  -1   19.75    4.55
  16  -6  -1   29.11    5.17
  15   5   1  831.87   28.38
  15   5   1  793.10   26.99
 -15  -5  -1  936.31   31.95
  14   5   1 1077.45   36.29
  14   5   1 1129.15   37.79
 -14  -5  -1 1046.43   35.42
  13   5   1  520.11   18.46
  13   5   1  462.67   16.85
 -13  -5  -1  481.96   17.47
  12   5   1   41.72    5.12
  12   5   1   60.75    5.79
 -12  -5  -1   58.94    5.74
  11   5   1  167.25    8.17
  11   5   1  161.67    8.12
 -11  -5  -1  182.56    8.89
  10   5   1  504.45   18.30
  10   5   1  490.64   17.63
 -10  -5  -1  564.58   20.22
   9   5   1 2040.13   67.47
  -9  -5  -1 1974.98   65.35
   8   5   1    4.86    4.60
  -8  -5  -1    6.00    4.86
   7   5   1 3765.39  123.10
  -7  -5  -1 3295.95  108.06
   5   5   1 1269.78   42.29
  -5  -5  -1 1343.71   44.67
   4   5   1 2040.13   67.11
  -4  -5  -1 2256.75   74.14
   3   5   1  574.92   19.80
  -3  -5  -1  672.11   22.96
   1   5   1  154.07    6.82
  -1  -5  -1  142.18    6.72
  -1   5   1 1646.16   54.23
   1  -5  -1 1429.54   47.25
  -2   5   1 3161.01  103.30
  -5   5   1  152.41    6.98
   5  -5  -1  161.67    7.44
  -6   5   1 2076.83   68.30
   6  -5  -1 2160.59   71.09
  -7   5   1 1512.26   50.05
   7  -5  -1 1680.29   55.53
  -8   5   1 5707.81  186.07
   8  -5  -1 6772.85  220.56
  -9   5   1  707.27   24.35
   9  -5  -1  785.86   26.99
 -10   5   1    3.00    4.08
  10  -5  -1    6.00    4.76
  10  -5  -1    8.27    4.50
 -11   5   1    7.86    4.29
  11  -5  -1   12.87    4.86
  11  -5  -1   -0.57    4.81
 -12   5   1   84.27    5.89
  12  -5  -1  103.09    6.62
  12  -5  -1  100.66    6.93
 -13   5   1  141.45    7.03
  13  -5  -1  150.45    8.12
  13  -5  -1  143.21    7.50
 -14   5   1   29.73    4.76
  14  -5  -1   14.06    5.33
  14  -5  -1   14.68    4.76
  15  -5  -1  326.70   12.30
  15  -5  -1  324.27   12.67
  16  -5  -1  795.16   26.94
  16  -5  -1  797.23   27.35
  15   4   1    1.40    4.24
  15   4   1    1.55    5.07
  14   4   1   43.89    4.96
  14   4   1   35.11    5.38
 -14  -4  -1   50.15    5.33
  13   4   1  118.03    6.72
  13   4   1  110.64    6.93
 -13  -4  -1  113.12    7.08
  12   4   1    2.38    4.91
  12   4   1    4.76    4.76
 -12  -4  -1   -5.58    5.07
  11   4   1   17.37    4.55
  11   4   1   19.80    5.12
 -11  -4  -1   15.05    4.96
  10   4   1  371.68   14.01
  10   4   1  418.31   15.51
 -10  -4  -1  422.24   15.77
   9   4   1   16.60    4.34
   9   4   1   20.84    5.02
  -9  -4  -1   16.60    4.91
   8   4   1  299.40   11.63
  -8  -4  -1  331.61   12.77
   7   4   1   61.06    5.07
  -7  -4  -1   76.00    5.43
   6   4   1  125.27    6.26
  -6  -4  -1  150.71    7.03
   5   4   1  982.32   32.93
  -5  -4  -1 1194.30   39.76
   4   4   1  106.19    5.74
  -4  -4  -1  109.66    5.84
   3   4   1 3978.92  129.77
  -1  -4  -1 4702.74  153.35
   0   4   1  313.15   11.79
   0  -4  -1  291.65   11.32
  -1   4   1 2009.11   66.13
   1  -4  -1 2127.50   69.95
  -2   4   1    4.86    3.83
   2  -4  -1    5.58    4.24
   3  -4  -1 3389.53  110.80
  -4   4   1 2361.71   77.45
   4  -4  -1 2577.82   84.48
  -5   4   1  667.46   22.80
   5  -4  -1  703.65   24.04
  -6   4   1 2597.47   85.15
   6  -4  -1 2730.34   89.49
  -7   4   1  193.52    8.17
   7  -4  -1  208.82    8.79
  -8   4   1  587.32   20.53
   8  -4  -1  601.80   20.78
  -9   4   1   45.81    4.60
   9  -4  -1   48.65    5.02
   9  -4  -1   47.77    5.38
 -10   4   1   50.82    4.96
  10  -4  -1   55.89    5.17
  10  -4  -1   61.42    5.58
 -11   4   1  934.76   31.69
 -12   4   1   33.35    4.91
  12  -4  -1   32.42    5.33
  12  -4  -1   32.57    5.27
 -13   4   1  184.68    8.43
  13  -4  -1  212.54    9.51
  13  -4  -1  216.68    9.82
  14  -4  -1   -4.03    5.17
  14  -4  -1    7.50    4.86
  15  -4  -1    7.55    4.19
  15  -4  -1    4.34    5.22
  16  -4  -1    7.86    4.08
  16  -4  -1    0.00    5.22
  16   3   1  351.05   12.87
  16   3   1  372.20   13.96
  15   3   1  894.43   30.19
  15   3   1  973.02   32.99
  14   3   1  540.28   19.03
  14   3   1  512.15   18.35
  13   3   1 1222.73   41.05
  13   3   1 1266.16   42.39
  12   3   1  136.85    7.13
  12   3   1  122.84    7.29
 -12  -3  -1  116.95    7.13
  11   3   1  216.94    9.31
  11   3   1  227.69    9.67
 -11  -3  -1  234.31   10.19
  10   3   1  135.15    7.44
  10   3   1  135.41    7.08
 -10  -3  -1  121.96    7.13
   9   3   1   79.15    6.10
   9   3   1   80.40    5.64
  -9  -3  -1   87.22    6.15
   8   3   1  885.64   30.04
   8   3   1  882.02   29.93
  -8  -3  -1  939.93   32.00
   7   3   1 2232.97   73.42
  -7  -3  -1 2202.47   72.54
   6   3   1 2139.91   70.37
  -6  -3  -1 2156.45   70.93
   1   3   1 3106.72  101.59
   0   3   1  718.13   24.35
   0  -3  -1  718.13   24.35
  -2   3   1  888.23   29.88
   2  -3  -1 1016.96   33.92
  -3   3   1  746.05   25.54
   3  -3  -1  766.21   26.16
  -4   3   1    5.69    3.62
   4  -3  -1    7.39    4.29
  -5   3   1  307.00   11.43
   5  -3  -1  300.80   11.22
  -6   3   1 4278.27  139.59
   6  -3  -1 4340.83  141.66
  -7   3   1   43.22    4.45
   7  -3  -1   47.05    4.81
  -8   3   1 2165.76   71.24
   8  -3  -1 2348.78   77.19
   8  -3  -1 2093.90   68.97
  -9   3   1 1518.98   50.41
   9  -3  -1 1502.95   49.94
   9  -3  -1 1600.67   53.10
 -10   3   1  364.60   13.55
  10  -3  -1  377.26   14.32
  10  -3  -1  384.45   14.37
 -11   3   1   97.04    6.00
  11  -3  -1  110.07    6.72
  11  -3  -1  107.59    6.41
 -12   3   1  362.63   13.65
  12  -3  -1  375.82   14.17
  12  -3  -1  411.18   15.30
  13  -3  -1   13.96    5.17
  13  -3  -1   16.70    4.70
  14  -3  -1  404.61   15.10
  14  -3  -1  423.85   15.72
  15  -3  -1  680.39   23.63
  15  -3  -1  674.18   23.32
  16  -3  -1  253.08   10.03
  16  -3  -1  231.57    9.98
  17  -3  -1  336.16   12.82
  17  -3  -1  329.18   12.25
  16   2   1  809.64   27.35
  16   2   1  869.10   29.57
  15   2   1   95.54    5.79
  15   2   1   84.53    6.36
  14   2   1  302.97   11.68
  14   2   1  294.54   11.63
  13   2   1  867.03   29.62
  13   2   1  937.34   31.80
  12   2   1 4365.64  142.80
  12   2   1 4404.42  144.04
  11   2   1  167.51    8.43
  11   2   1  166.74    8.12
 -11  -2  -1  168.60    8.43
  10   2   1    2.02    4.45
  10   2   1   -1.03    4.81
 -10  -2  -1    9.20    4.96
   9   2   1  385.28   14.22
   9   2   1  381.97   14.22
  -9  -2  -1  402.18   14.94
   8   2   1 4465.43  145.85
   8   2   1 4225.53  138.04
  -8  -2  -1 4502.65  147.09
   7   2   1 3209.61  105.11
   7   2   1 3092.24  101.23
  -7  -2  -1 3054.50  100.09
   6   2   1  209.85    8.79
   6   2   1  181.99    7.91
  -6  -2  -1  201.53    8.58
   5   2   1  953.37   31.95
  -5  -2  -1  939.41   31.59
  -4  -2  -1 4815.96  156.96
   3   2   1  439.67   15.61
  -3  -2  -1  452.38   16.03
   1  -2  -1 1514.84   49.74
  -7   2   1 2200.40   72.33
   7  -2  -1 2220.56   73.00
   7  -2  -1 2213.84   72.80
  -8   2   1   33.97    4.50
  -9   2   1 4037.86  131.89
   9  -2  -1 3939.63  128.79
   9  -2  -1 3721.96  121.76
 -10   2   1 2703.97   88.77
  10  -2  -1 2878.20   94.61
  10  -2  -1 2914.91   95.70
 -11   2   1  285.55   10.91
  11  -2  -1  280.22   11.32
  11  -2  -1  291.54   11.79
  12  -2  -1  188.09    8.94
  12  -2  -1  197.86    9.00
  13  -2  -1  422.76   15.72
  13  -2  -1  468.93   17.27
  14  -2  -1  262.80   10.81
  14  -2  -1  254.58   10.70
  15  -2  -1  544.93   19.39
  15  -2  -1  535.62   18.92
  16  -2  -1   -9.51    5.07
  16  -2  -1   -2.43    4.39
  17  -2  -1    7.65    4.03
  17  -2  -1   -3.46    4.81
  16   1   1   53.61    5.12
  16   1   1   52.37    5.53
  15   1   1   95.39    5.79
  15   1   1  113.90    6.82
  14   1   1  200.50    9.15
  14   1   1  205.93    8.89
  13   1   1    0.98    4.65
  13   1   1    5.43    4.91
  12   1   1  530.97   19.03
  12   1   1  529.42   19.08
  11   1   1 2785.14   91.56
  11   1   1 2756.70   90.58
  10   1   1 2050.98   67.78
  10   1   1 2008.59   66.38
   9   1   1 1193.26   40.02
   9   1   1 1324.07   44.31
  -9  -1  -1 1263.06   42.29
   8   1   1 1941.38   64.01
   8   1   1 1748.02   57.75
  -8  -1  -1 2062.36   68.04
   7   1   1    9.56    4.03
   7   1   1    7.08    4.03
  -7  -1  -1    6.72    4.34
   6   1   1 2429.44   79.72
   6   1   1 2465.63   80.91
  -6  -1  -1 2511.64   82.36
   5   1   1   26.21    4.19
   5   1   1   27.82    3.98
  -5  -1  -1   30.66    4.45
   4   1   1  179.92    7.65
   4   1   1  184.16    7.65
  -4  -1  -1  189.85    8.12
   3   1   1 1605.84   52.94
  -3  -1  -1 1648.75   54.39
   1   1   1 1496.75   48.91
  -1   1   1   13.34    1.91
   1  -1  -1   14.63    2.17
  -4   1   1 1421.26   47.25
   4  -1  -1 1344.75   44.77
   4  -1  -1 1429.02   47.46
  -5   1   1   40.48    4.60
   5  -1  -1   43.74    4.76
   5  -1  -1   45.19    4.55
  -6   1   1  484.08   17.06
   6  -1  -1  460.24   16.34
   6  -1  -1  436.41   15.67
  -7   1   1  876.85   29.52
   7  -1  -1  900.63   30.40
   7  -1  -1  902.70   30.40
  -9   1   1  177.70    7.81
   9  -1  -1  160.48    7.50
   9  -1  -1  169.68    7.44
  10  -1  -1  162.86    8.01
  10  -1  -1  182.19    8.22
  11  -1  -1  369.97   13.86
  11  -1  -1  371.78   13.91
  12  -1  -1 1129.67   38.26
  12  -1  -1 1156.55   39.14
  13  -1  -1  358.70   13.86
  13  -1  -1  376.54   14.32
  14  -1  -1  455.44   16.65
  14  -1  -1  474.82   17.27
  15  -1  -1   93.73    6.15
  15  -1  -1   92.39    6.36
  16  -1  -1    6.93    4.39
  16  -1  -1    8.48    5.12
  17  -1  -1   -1.91    4.29
  17  -1  -1    8.94    4.91
  16   0   1    3.72    4.39
  16   0   1   -3.52    4.91
  15   0   1    6.41    4.55
  15   0   1    4.86    5.12
  14   0   1   -0.67    4.34
  14   0   1   -2.74    4.86
  13   0   1    0.31    4.34
  13   0   1  -11.48    4.55
  12   0   1   -9.15    4.34
  12   0   1   -5.33    5.02
  11   0   1   -1.03    4.39
  11   0   1    7.44    5.12
  10   0   1    5.12    4.14
  10   0   1    2.17    4.86
   9   0   1    5.64    3.98
   9   0   1    3.67    4.91
   8   0   1    2.48    3.72
   8   0   1    1.34    4.19
   7   0   1    4.76    3.83
   7   0   1    0.10    3.98
   6   0   1   -0.16    3.77
   6   0   1   -0.78    3.88
  -6   0  -1    3.15    4.14
   5   0   1    1.91    3.93
   5   0   1    4.60    3.83
  -5   0  -1    0.93    4.03
   4   0   1    6.67    3.93
   4   0   1   -1.19    3.93
  -4   0  -1    3.41    3.93
   3   0   1    1.60    3.98
   3   0   1    1.45    3.93
  -3   0  -1    1.03    4.08
   2   0   1   -1.09    3.36
   2   0   1   -0.72    3.26
  -2   0  -1   -2.84    3.62
   1   0   1   -0.05    1.91
   1   0   1    1.71    1.86
  -1   0  -1    0.00    1.96
   0   0   1    1.76    0.52
   0   0  -1    2.33    0.52
  -1   0   1    2.84    1.14
   1   0  -1    5.17    1.29
  -2   0   1    3.15    2.84
  -2   0   1    2.53    2.43
   2   0  -1    0.52    2.79
   2   0  -1    2.53    2.53
  -3   0   1   10.86    3.88
  -3   0   1   10.50    4.34
   3   0  -1    7.76    3.98
   3   0  -1    7.91    4.19
  -4   0   1    0.41    3.93
  -4   0   1   -2.69    4.19
   4   0  -1    4.39    4.03
   4   0  -1    3.21    4.19
  -5   0   1   -1.60    3.88
  -5   0   1   -1.45    3.98
   5   0  -1    3.98    4.39
   5   0  -1    2.53    3.67
  -6   0   1    4.86    3.21
  -6   0   1   11.94    4.08
   6   0  -1    1.60    4.34
   6   0  -1    0.72    4.03
   7   0  -1    2.12    4.19
   7   0  -1    3.26    4.29
   8   0  -1    5.58    4.19
   8   0  -1    2.53    3.72
   9   0  -1    0.72    4.34
   9   0  -1    4.55    4.14
  10   0  -1    5.27    4.70
  10   0  -1   -4.08    4.39
  11   0  -1   -3.52    4.91
  11   0  -1    0.98    4.19
  12   0  -1    5.17    4.50
  12   0  -1    5.12    5.33
  13   0  -1    1.24    4.65
  13   0  -1    1.09    5.22
  14   0  -1    2.59    5.12
  14   0  -1    0.31    4.60
  15   0  -1    1.24    4.60
  15   0  -1    2.38    5.02
  16   0  -1    8.07    4.96
  16   0  -1   -5.02    4.24
  17   0  -1    1.03    4.39
  17   0  -1   -3.52    4.86
  16  -1   1   50.67    5.53
  16  -1   1   51.39    4.96
  15  -1   1  109.35    6.88
  15  -1   1  107.80    6.10
  14  -1   1  215.59    9.41
  14  -1   1  203.65    9.15
  13  -1   1   -6.15    4.86
  13  -1   1    5.43    4.96
  12  -1   1  555.27   19.80
  12  -1   1  567.68   20.16
  11  -1   1 2715.34   89.29
  11  -1   1 2723.10   89.55
  10  -1   1 2082.00   68.81
  10  -1   1 2057.71   67.99
   9  -1   1 1274.95   42.60
   9  -1   1 1338.54   44.77
   8  -1   1 1788.86   59.04
   8  -1   1 1763.01   58.22
   7  -1   1    7.19    4.03
   7  -1   1    1.65    4.08
   6  -1   1 2570.58   84.32
   6  -1   1 2621.25   85.93
  -6   1  -1 2393.76   78.48
   5  -1   1   19.85    3.98
   5  -1   1   18.35    4.08
  -5   1  -1   24.09    3.83
   4  -1   1  185.66    7.70
   4  -1   1  184.99    7.76
  -4   1  -1  169.84    7.29
   3  -1   1 1693.21   55.73
   3  -1   1 1693.21   55.79
  -3   1  -1 1591.88   52.53
  -1  -1   1   12.87    1.81
   1   1  -1   13.44    1.65
  -4  -1   1 1550.00   51.34
   4   1  -1 1427.47   47.41
   4   1  -1 1482.79   49.12
  -5  -1   1   50.05    4.96
   5   1  -1   41.21    4.60
   5   1  -1   51.65    5.02
  -6  -1   1  533.56   18.61
   6   1  -1  522.70   18.25
   6   1  -1  505.59   17.79
  -7  -1   1  994.21   33.40
   7   1  -1  938.89   31.69
   7   1  -1  894.43   30.14
   8   1  -1 9999.00  325.15
  -9  -1   1  169.99    8.07
   9   1  -1  162.08    7.76
   9   1  -1  167.98    7.65
  10   1  -1  179.56    8.43
  10   1  -1  175.22    7.96
  11   1  -1  359.32   13.75
  11   1  -1  360.20   13.70
  12   1  -1 1023.68   34.74
  12   1  -1 1126.57   37.95
  13   1  -1  372.97   14.11
  13   1  -1  371.73   14.27
  14   1  -1  427.57   15.87
  14   1  -1  422.97   15.67
  15   1  -1   97.51    6.05
  15   1  -1  105.83    6.77
  16   1  -1   11.06    5.02
  16   1  -1    5.38    4.24
  17   1  -1    4.34    4.60
  17   1  -1    3.21    4.86
  15  -2   1   80.45    5.58
  15  -2   1   90.53    6.62
  14  -2   1  315.43   12.15
  14  -2   1  291.80   11.68
  13  -2   1  885.64   30.35
  13  -2   1  877.89   29.99
  12  -2   1 4496.96  147.04
  12  -2   1 4509.89  147.45
  11  -2   1  175.68    8.27
  11  -2   1  163.38    8.22
  10  -2   1    7.13    4.60
  10  -2   1    3.57    4.81
   9  -2   1  381.92   14.11
   9  -2   1  402.80   14.84
   8  -2   1 3967.55  129.67
   8  -2   1 4266.38  139.39
  -8   2  -1 4144.88  135.41
   7  -2   1 2941.79   96.32
   7  -2   1 2969.71   97.25
  -7   2  -1 2967.13   97.20
   6  -2   1  186.74    7.86
   6  -2   1  185.81    8.01
  -6   2  -1  188.04    7.91
   5  -2   1  981.29   32.78
   5  -2   1  981.29   32.83
  -5   2  -1  993.70   33.14
   3  -2   1  446.90   15.77
  -3   2  -1  427.21   15.05
  -7  -2   1 2044.26   67.31
   7   2  -1 2463.56   80.81
   7   2  -1 2297.60   75.54
  -8  -2   1   39.81    4.65
   8   2  -1   26.16    4.08
   8   2  -1   28.54    4.39
  -9  -2   1 4341.34  141.92
   9   2  -1 3932.39  128.53
   9   2  -1 4209.51  137.53
 -10  -2   1 2846.15   93.53
  10   2  -1 2972.82   97.56
  10   2  -1 2711.72   89.13
 -11  -2   1  295.68   11.89
  11   2  -1  277.84   11.27
  11   2  -1  268.59   10.86
  12   2  -1  202.36    9.31
  12   2  -1  180.75    8.32
  13   2  -1  429.17   15.92
  13   2  -1  443.44   16.34
  14   2  -1  256.02   10.55
  14   2  -1  267.50   10.96
  15   2  -1  546.48   19.34
  15   2  -1  566.64   19.85
  16   2  -1    1.55    4.96
  16   2  -1    0.93    4.29
  16  -3   1  306.07   11.43
  16  -3   1  348.52   13.34
  14  -3   1  565.09   19.85
  14  -3   1  527.87   18.97
  13  -3   1 1276.50   42.76
  13  -3   1 1278.57   42.86
  12  -3   1  122.53    7.19
  12  -3   1  109.14    6.82
  11  -3   1  220.76    9.67
  11  -3   1  239.63   10.08
  10  -3   1  146.06    7.44
  10  -3   1  136.85    7.60
 -10   3  -1  137.16    6.93
   9  -3   1   91.30    5.95
   9  -3   1   89.70    6.10
  -9   3  -1   78.28    5.27
   8  -3   1  902.70   30.56
   8  -3   1  878.92   29.88
  -8   3  -1  879.44   29.73
   7  -3   1 2158.01   70.93
   7  -3   1 2150.25   70.78
  -7   3  -1 2205.57   72.54
   6  -3   1 2177.65   71.55
   6  -3   1 2078.39   68.35
  -6   3  -1 2159.04   70.93
   5  -3   1 4218.81  137.63
   0  -3   1  869.10   29.06
   0   3  -1  795.68   26.68
  -2  -3   1  842.21   28.44
   2   3  -1  879.44   29.68
  -3  -3   1  687.11   23.58
   3   3  -1  688.66   23.58
  -4  -3   1   10.13    3.98
   4   3  -1    9.20    3.62
  -5  -3   1  281.62   10.91
   5   3  -1  292.73   10.91
   6   3  -1 4201.23  137.11
  -7  -3   1   42.76    5.02
   7   3  -1   39.29    4.55
  -8  -3   1 1980.15   65.35
   8   3  -1 1993.60   65.76
   8   3  -1 1927.94   63.54
  -9  -3   1 1500.88   49.89
   9   3  -1 1431.60   47.57
   9   3  -1 1451.25   48.34
 -10  -3   1  407.82   15.15
  10   3  -1  355.19   13.29
  10   3  -1  391.69   14.68
 -11  -3   1   88.93    6.26
  11   3  -1   91.30    5.79
  11   3  -1  105.42    6.57
 -12  -3   1  384.97   14.58
  12   3  -1  375.04   14.27
  12   3  -1  347.90   13.18
 -13  -3   1   18.82    5.48
  13   3  -1   24.92    5.43
  13   3  -1   18.46    4.96
  14   3  -1  383.21   14.27
  14   3  -1  415.88   15.25
  15   3  -1  658.67   22.85
  15   3  -1  704.17   24.20
  16   3  -1  260.99   10.65
  16   3  -1  252.35   10.03
  16  -4   1   32.31    5.43
  16  -4   1   40.02    4.70
  15  -4   1    7.29    4.34
  15  -4   1    5.53    5.12
  14  -4   1   41.21    4.86
  14  -4   1   46.32    5.69
  13  -4   1  106.40    6.36
  13  -4   1  115.09    6.93
  12  -4   1    1.76    4.70
  12  -4   1    0.16    4.96
  11  -4   1   28.28    4.91
  11  -4   1   21.46    5.33
 -11   4  -1   18.10    4.55
  10  -4   1  386.26   14.53
  10  -4   1  409.11   15.36
 -10   4  -1  372.14   13.80
   9  -4   1   17.06    4.65
   9  -4   1   11.22    4.70
  -9   4  -1   11.74    3.98
   8  -4   1  321.22   12.36
   8  -4   1  330.68   12.51
  -8   4  -1  337.09   12.56
   7  -4   1   71.81    5.07
   7  -4   1   60.34    4.65
  -7   4  -1   55.22    4.65
   6  -4   1  134.47    6.41
  -6   4  -1  144.30    6.72
   5  -4   1 1084.69   36.19
  -5   4  -1  985.94   32.99
   4  -4   1  126.62    6.15
  -4   4  -1  109.71    5.58
  -3   4  -1 3428.30  111.93
   0  -4   1  377.57   13.70
   0   4  -1  341.69   12.62
  -1  -4   1 2432.02   79.77
   1   4  -1 2075.80   68.25
  -2  -4   1    7.76    4.55
   2   4  -1    6.05    4.24
  -3  -4   1 3639.24  118.91
  -4  -4   1 2477.00   81.17
   4   4  -1 2142.50   70.26
  -6  -4   1 2818.75   92.34
   6   4  -1 2563.86   84.07
  -7  -4   1  193.41    8.27
   7   4  -1  197.39    8.32
  -8  -4   1  619.90   21.66
   8   4  -1  594.56   20.68
  -9  -4   1   48.75    5.02
   9   4  -1   48.55    4.81
   9   4  -1   50.72    4.96
 -10  -4   1   42.81    5.58
  10   4  -1   53.87    5.38
  10   4  -1   46.38    4.96
 -11  -4   1  967.33   32.99
  11   4  -1 1026.27   34.74
  11   4  -1  933.72   31.64
 -12  -4   1   28.85    5.02
  12   4  -1   29.37    4.70
  12   4  -1   35.05    5.74
 -13  -4   1  192.28    8.89
  13   4  -1  200.29    9.00
  13   4  -1  191.45    8.79
 -14  -4   1    5.58    4.60
  14   4  -1    0.21    4.29
  14   4  -1   -2.38    4.91
  15   4  -1    3.52    4.34
  15   4  -1   -0.83    4.86
  16   4  -1   12.41    4.34
  16   4  -1    7.96    4.96
  16  -5   1  268.43   10.29
  16  -5   1  242.94   10.19
  15  -5   1  821.53   28.18
  15  -5   1  844.28   28.59
  14  -5   1 1053.67   35.42
  14  -5   1 1105.89   37.33
  13  -5   1  482.32   17.32
  13  -5   1  490.33   17.58
  12  -5   1   58.63    5.84
  12  -5   1   54.65    5.43
 -12   5  -1   44.98    5.02
  11  -5   1  149.21    7.86
  11  -5   1  157.95    8.22
 -11   5  -1  147.04    7.03
  10  -5   1  565.61   20.11
  10  -5   1  540.79   19.28
 -10   5  -1  458.43   16.54
   9  -5   1 1909.84   63.18
   9  -5   1 1984.81   65.61
  -9   5  -1 1913.98   63.13
   8  -5   1    7.03    4.34
   8  -5   1   -4.39    4.50
  -8   5  -1    4.24    3.83
   7  -5   1 3807.27  124.50
  -7   5  -1 3845.01  125.69
   5  -5   1 1395.93   46.32
  -5   5  -1 1355.60   44.93
   4  -5   1 2573.17   84.38
  -4   5  -1 2553.00   83.60
   3  -5   1  619.38   21.30
  -3   5  -1  570.26   19.59
   1  -5   1  167.93    7.29
  -1   5  -1  172.79    7.34
   0  -5   1  200.29    8.38
   0   5  -1  178.52    7.60
  -1  -5   1 1620.31   53.46
   1   5  -1 1362.84   45.14
  -2  -5   1 3468.11  113.28
   2   5  -1 3288.19  107.43
  -5  -5   1  153.97    6.93
   5   5  -1  160.79    7.13
  -6  -5   1 2055.12   67.63
   6   5  -1 2101.13   69.07
  -7  -5   1 1673.57   55.37
   7   5  -1 1376.80   45.70
  -8  -5   1 5604.40  182.82
  -9  -5   1  771.90   26.57
   9   5  -1  769.83   26.47
 -10  -5   1    0.21    4.65
  10   5  -1   -1.81    4.19
  10   5  -1    3.00    5.02
 -11  -5   1   14.58    5.27
  11   5  -1    6.00    4.55
  11   5  -1   14.53    5.27
 -12  -5   1   85.77    6.62
  12   5  -1   95.54    6.41
  12   5  -1  103.71    6.93
 -13  -5   1  137.37    7.39
  13   5  -1  142.70    7.29
  13   5  -1  139.39    7.39
 -14  -5   1   25.75    5.07
  14   5  -1   16.29    5.12
  14   5  -1   22.70    4.39
 -15  -5   1  328.04   12.82
  15   5  -1  362.58   13.65
  15   5  -1  334.61   12.51
  16   5  -1  722.26   24.76
  16   5  -1  783.79   26.57
  15  -6   1  182.45    8.17
  15  -6   1  170.20    8.27
  14  -6   1   10.96    5.27
  14  -6   1    5.58    4.81
  13  -6   1  115.09    6.67
  13  -6   1  112.55    6.93
 -13   6  -1  107.07    6.31
  12  -6   1 1320.96   44.26
  12  -6   1 1308.56   43.79
 -12   6  -1 1241.86   41.57
 -11   6  -1   98.39    6.20
  10  -6   1  360.31   13.75
  10  -6   1  343.50   13.18
 -10   6  -1  313.00   11.99
   9  -6   1  841.69   28.85
   9  -6   1  886.67   30.25
  -9   6  -1  846.86   28.80
   8  -6   1 3976.85  130.08
  -8   6  -1 3886.37  127.03
   7  -6   1 3767.98  123.31
  -7   6  -1 3670.26  120.05
   6  -6   1  124.55    6.51
  -6   6  -1  115.55    6.10
   5  -6   1   55.42    4.55
  -5   6  -1   51.91    4.50
   2  -6   1 3283.02  107.33
  -2   6  -1 3825.37  124.86
   1  -6   1  889.78   29.93
  -1   6  -1  899.08   30.19
   0  -6   1 2701.38   88.46
   0   6  -1 2533.36   82.98
  -1  -6   1 1137.94   37.90
   1   6  -1 1429.54   47.25
  -2  -6   1 4494.38  146.57
   2   6  -1 3574.62  116.74
  -3  -6   1 1424.37   47.25
   3   6  -1 1326.65   44.05
  -4  -6   1  669.01   23.01
   4   6  -1  601.28   20.73
  -5  -6   1  756.39   25.70
   5   6  -1  743.46   25.23
  -7  -6   1  197.24    8.74
   7   6  -1  155.16    7.24
  -8  -6   1  470.79   16.91
   8   6  -1  402.70   14.84
  -9  -6   1 3197.72  104.95
   9   6  -1 3104.14  101.80
 -10  -6   1 1275.98   42.91
  10   6  -1 1232.56   41.41
 -11  -6   1  775.00   26.78
  11   6  -1  724.85   25.02
  11   6  -1  730.02   25.33
 -12  -6   1  286.32   11.84
  12   6  -1  254.58   10.55
  12   6  -1  276.08   11.32
 -13  -6   1  873.23   29.83
  13   6  -1  943.03   32.00
  13   6  -1  938.89   31.85
 -14  -6   1  290.15   11.48
  14   6  -1  306.95   11.79
  14   6  -1  310.98   12.15
 -15  -6   1  220.97    9.41
  15   6  -1  188.30    7.96
  15   6  -1  200.91    8.74
  15  -7   1    9.25    4.55
  15  -7   1    0.52    5.33
  14  -7   1   97.82    6.10
  14  -7   1  102.68    6.77
 -14   7  -1   99.11    5.79
  13  -7   1    6.62    5.17
  13  -7   1   10.08    4.45
 -13   7  -1    5.33    3.98
  12  -7   1  404.92   15.05
  12  -7   1  388.69   14.58
 -12   7  -1  393.08   14.42
  11  -7   1 1264.09   42.39
  11  -7   1 1403.17   46.89
 -11   7  -1 1300.80   43.53
  10  -7   1  782.76   26.99
  10  -7   1  805.50   27.71
 -10   7  -1  806.02   27.56
   9  -7   1 1130.70   38.10
  -9   7  -1 1157.07   38.83
   8  -7   1   48.86    5.12
  -8   7  -1   58.27    4.76
   7  -7   1  812.22   27.76
  -7   7  -1  845.83   28.75
   6  -7   1 1239.28   41.36
  -6   7  -1 1242.90   41.52
   5  -7   1 4496.96  146.78
  -5   7  -1 4537.29  148.07
   4  -7   1 4569.86  149.16
  -4   7  -1 3684.74  120.41
   3  -7   1  167.46    7.50
  -3   7  -1  153.35    6.93
  -1   7  -1 4574.00  149.16
   0  -7   1   40.02    4.60
   0   7  -1   39.19    4.24
  -1  -7   1  346.19   12.87
   1   7  -1  339.21   12.46
  -2  -7   1  462.36   16.39
   2   7  -1  464.07   16.39
  -3  -7   1 2653.82   87.12
   3   7  -1 2658.99   87.12
  -4  -7   1  218.02    9.20
   4   7  -1  212.85    8.74
  -5  -7   1 1160.17   38.83
   5   7  -1 1235.66   41.15
  -6  -7   1  272.31   10.60
   6   7  -1  284.77   10.91
  -7  -7   1   38.47    4.76
   7   7  -1   36.66    4.50
  -8  -7   1  807.05   27.66
   8   7  -1  832.39   28.49
  -9  -7   1  372.71   14.27
   9   7  -1  361.24   13.60
 -10  -7   1  713.48   24.92
  10   7  -1  758.46   26.21
 -11  -7   1  569.23   20.27
  11   7  -1  583.19   20.63
 -12  -7   1 1924.83   63.80
  12   7  -1 1802.82   59.66
  12   7  -1 1708.21   56.72
 -13  -7   1  830.32   28.54
  13   7  -1  980.25   33.09
  13   7  -1  997.83   33.76
 -14  -7   1  148.85    7.86
  14   7  -1  145.28    7.13
  14   7  -1  153.76    7.55
 -15  -7   1    5.48    4.96
  15   7  -1   17.94    4.96
  15   7  -1   11.79    4.14
  15  -8   1   15.72    5.02
  15  -8   1   20.27    4.65
 -15   8  -1   23.78    4.19
  14  -8   1   36.86    5.07
  14  -8   1   37.64    5.53
 -14   8  -1   30.61    4.70
  13  -8   1    5.12    4.70
  13  -8   1    0.72    5.22
 -13   8  -1    1.50    4.14
  12  -8   1   39.14    5.43
  12  -8   1   27.25    4.86
 -12   8  -1   27.25    4.55
  11  -8   1   -1.86    5.07
  11  -8   1    6.93    4.39
 -11   8  -1    3.10    4.34
  10  -8   1  366.97   13.86
 -10   8  -1  346.29   13.18
   9  -8   1  425.19   15.72
  -9   8  -1  440.08   15.92
   8  -8   1 1535.01   51.18
  -8   8  -1 1491.58   49.58
   7  -8   1  968.88   32.83
  -7   8  -1 1035.06   34.79
   6  -8   1  388.84   14.27
  -6   8  -1  403.22   14.63
   5  -8   1  591.46   20.63
  -5   8  -1  564.06   19.75
   4  -8   1   73.98    4.91
  -4   8  -1   67.99    5.12
   3  -8   1   91.25    5.43
  -3   8  -1   78.43    5.22
   2  -8   1  441.89   15.82
  -2   8  -1  430.52   15.25
   1  -8   1  890.29   30.09
  -1   8  -1  952.85   32.00
   0  -8   1  404.56   14.73
   0   8  -1  381.55   13.80
  -1  -8   1  282.75   10.86
   1   8  -1  275.88   10.60
  -2  -8   1 2777.90   91.15
   2   8  -1 3089.66  101.13
  -3  -8   1 1425.40   47.41
   3   8  -1 1481.75   49.17
  -4  -8   1   10.96    3.77
   4   8  -1    3.00    4.29
  -5  -8   1  491.99   17.32
   5   8  -1  444.16   15.92
  -6  -8   1   78.07    5.74
   6   8  -1   68.19    5.27
  -8  -8   1   40.84    5.33
   8   8  -1   34.59    4.86
  -9  -8   1  141.87    7.39
   9   8  -1  136.23    7.24
 -10  -8   1  640.06   22.49
  10   8  -1  587.32   20.73
 -11  -8   1   -0.52    4.96
  11   8  -1    3.93    4.91
 -12  -8   1  119.69    7.24
  12   8  -1  113.54    6.77
  12   8  -1  109.04    6.88
 -13  -8   1   25.90    4.96
  13   8  -1   25.85    5.12
  13   8  -1   14.58    4.24
 -14  -8   1  114.47    6.82
  14   8  -1  112.66    6.57
  14   8  -1  110.43    6.10
 -15  -8   1   -2.17    4.91
  15   8  -1   -1.65    4.14
  15   8  -1   -0.93    4.65
  14  -9   1    1.24    4.91
  14  -9   1    3.15    4.08
 -14   9  -1    7.76    4.29
  13  -9   1  440.60   15.87
  13  -9   1  438.94   16.23
 -13   9  -1  431.86   15.36
  12  -9   1  105.06    6.88
  12  -9   1   88.82    5.74
 -12   9  -1   94.30    5.64
  11  -9   1 1589.29   52.74
  11  -9   1 1613.59   53.61
 -11   9  -1 1612.56   53.51
  10  -9   1 2084.07   68.87
 -10   9  -1 1952.75   64.57
   9  -9   1  779.14   26.88
  -9   9  -1  770.35   26.47
   8  -9   1    4.70    4.24
  -8   9  -1    7.19    4.14
   7  -9   1   38.47    4.76
  -7   9  -1   43.12    4.70
   6  -9   1 2737.06   89.91
  -6   9  -1 2637.79   86.60
   5  -9   1 2490.96   82.00
  -5   9  -1 2590.74   85.05
   4  -9   1    0.62    4.03
  -4   9  -1   -6.15    3.93
   3  -9   1   44.26    4.55
  -3   9  -1   44.98    4.65
   2  -9   1 3886.37  127.03
  -2   9  -1 3613.91  118.19
   1  -9   1 2557.66   83.91
  -1   9  -1 2702.42   88.56
   0  -9   1  363.20   13.49
   0   9  -1  350.95   12.98
  -1  -9   1  568.20   19.90
   1   9  -1  512.51   18.10
  -2  -9   1  804.99   27.40
   2   9  -1  734.16   25.08
  -3  -9   1 4036.31  131.89
   3   9  -1 3680.60  120.31
  -4  -9   1 1399.55   46.53
   4   9  -1 1372.67   45.60
  -5  -9   1  276.55   11.12
   5   9  -1  301.11   11.68
  -6  -9   1  652.47   22.75
   6   9  -1  709.86   24.35
  -7  -9   1  185.14    8.43
   7   9  -1  183.59    8.17
  -8  -9   1  160.48    8.01
   8   9  -1  159.55    7.81
  -9  -9   1  384.09   14.48
   9   9  -1  409.01   15.15
 -10  -9   1  128.68    7.19
  10   9  -1  120.52    7.03
 -11  -9   1  733.64   25.54
  11   9  -1  792.06   27.14
 -12  -9   1 1162.24   39.03
  12   9  -1 1191.19   39.91
 -13  -9   1  980.25   33.14
  13   9  -1 1044.88   35.00
  13   9  -1  977.15   32.83
 -14  -9   1   20.01    4.91
  14   9  -1   25.75    4.19
  14   9  -1   21.71    4.81
  14 -10   1  149.00    7.50
  14 -10   1  130.70    6.36
 -14  10  -1  139.23    6.72
  13 -10   1  184.06    8.69
  13 -10   1  175.78    7.96
 -13  10  -1  150.09    7.29
  12 -10   1  770.86   26.32
  12 -10   1  803.95   27.61
 -12  10  -1  749.15   25.54
  11 -10   1  694.35   23.99
 -11  10  -1  686.59   23.73
  10 -10   1    2.59    4.24
 -10  10  -1    8.94    4.24
   9 -10   1   93.11    6.15
  -9  10  -1   76.57    5.69
   8 -10   1  969.40   32.93
  -8  10  -1  901.15   30.56
   7 -10   1 1548.97   51.60
  -7  10  -1 1636.86   54.34
   6 -10   1  554.24   19.65
  -6  10  -1  538.21   18.97
   5 -10   1  903.22   30.76
  -5  10  -1  845.83   28.80
  -4  10  -1 5304.54  172.94
   3 -10   1 5428.62  177.13
  -3  10  -1 5340.73  174.28
   2 -10   1 1532.94   50.93
  -2  10  -1 1604.80   53.15
   1 -10   1   76.78    5.53
  -1  10  -1   74.66    5.22
   0 -10   1  242.69    9.98
   0  10  -1  221.49    8.94
  -1 -10   1  585.77   20.47
   1  10  -1  576.98   20.16
  -2 -10   1 1166.89   39.19
   2  10  -1  964.74   32.57
  -3 -10   1   15.15    4.76
   3  10  -1   19.28    4.39
  -4 -10   1 2045.81   67.57
   4  10  -1 1714.93   56.77
  -5 -10   1 2709.14   88.98
   5  10  -1 2649.17   86.96
  -6 -10   1 2183.86   72.02
   6  10  -1 2429.44   79.88
  -7 -10   1  495.71   17.79
   7  10  -1  459.67   16.49
  -8 -10   1    5.17    4.91
   8  10  -1   -8.89    4.86
  -9 -10   1   -0.67    4.55
   9  10  -1    6.51    4.70
 -10 -10   1   98.80    6.46
  10  10  -1   92.96    6.10
 -11 -10   1   65.97    5.48
  11  10  -1   85.88    5.74
 -12 -10   1  136.59    7.39
  12  10  -1  139.39    6.88
 -13 -10   1  965.26   32.52
  13  10  -1  936.82   31.33
  13  10  -1  899.08   30.35
  14  10  -1  513.34   18.04
  14  10  -1  525.28   18.20
  13 -11   1  274.12   10.60
  13 -11   1  270.24   11.01
 -13  11  -1  271.74   10.50
  12 -11   1   48.81    5.69
  12 -11   1   56.30    5.02
 -12  11  -1   71.24    5.33
  11 -11   1   19.23    4.45
 -11  11  -1   13.24    4.45
  10 -11   1    3.31    4.65
 -10  11  -1    6.67    3.98
   9 -11   1  153.09    7.50
  -9  11  -1  157.38    7.60
   8 -11   1   25.85    4.70
  -8  11  -1   13.70    4.76
   7 -11   1  900.63   30.81
  -7  11  -1  848.93   28.95
   6 -11   1  160.95    7.91
  -6  11  -1  164.51    7.70
   5 -11   1   32.00    5.12
  -5  11  -1   26.32    4.55
   4 -11   1  140.58    7.50
  -4  11  -1  147.24    7.24
   3 -11   1  259.33   10.50
  -3  11  -1  213.73    9.05
   2 -11   1 1214.98   40.74
  -2  11  -1 1214.98   40.59
   1 -11   1  115.71    6.57
  -1  11  -1  104.23    6.00
   0 -11   1   98.96    6.31
   0  11  -1  105.83    6.10
  -1 -11   1  218.54    9.51
   1  11  -1  188.30    8.32
  -2 -11   1 1149.83   38.72
   2  11  -1 1332.86   44.41
  -3 -11   1 1308.04   43.84
   3  11  -1 1330.79   44.36
  -4 -11   1  427.52   15.77
   4  11  -1  336.26   12.67
  -5 -11   1  289.01   11.53
   5  11  -1  267.19   10.60
  -6 -11   1  154.38    7.91
   6  11  -1  152.73    7.55
  -7 -11   1  211.04    9.15
   7  11  -1  200.55    8.74
  -8 -11   1  342.68   13.24
   8  11  -1  367.03   13.75
  -9 -11   1  252.56   10.60
   9  11  -1  254.99   10.44
 -10 -11   1  369.71   14.06
  10  11  -1  378.81   14.06
 -11 -11   1   28.18    5.12
  11  11  -1   34.02    4.86
 -12 -11   1   75.95    5.58
  12  11  -1   56.04    5.02
 -13 -11   1    3.98    4.60
  13  11  -1   -6.77    4.45
  13 -12   1  346.97   12.67
  13 -12   1  342.47   12.98
 -13  12  -1  326.54   12.05
  12 -12   1   64.57    5.07
 -12  12  -1   55.94    5.02
  11 -12   1  461.74   16.54
 -11  12  -1  394.53   14.27
  10 -12   1  153.81    7.44
 -10  12  -1  133.44    6.88
   9 -12   1   17.53    4.65
  -9  12  -1   12.46    4.45
   8 -12   1   81.79    5.74
  -8  12  -1   71.50    5.64
   7 -12   1    8.07    4.55
  -7  12  -1    9.20    4.60
   6 -12   1  110.54    6.77
  -6  12  -1  119.48    6.57
   5 -12   1  240.00   10.19
  -5  12  -1  250.70   10.19
   4 -12   1 2091.31   69.12
  -4  12  -1 2037.02   67.21
   3 -12   1 1753.70   58.27
  -3  12  -1 1592.91   52.89
   2 -12   1  163.38    7.96
  -2  12  -1  143.94    7.13
   1 -12   1  471.98   17.22
  -1  12  -1  442.82   15.98
   0 -12   1  169.11    8.12
   0  12  -1  160.89    7.55
  -1 -12   1    9.25    5.07
   1  12  -1    8.69    4.39
  -2 -12   1   52.99    5.33
   2  12  -1   52.74    5.12
  -3 -12   1   24.25    4.96
   3  12  -1   22.70    4.19
  -4 -12   1 1306.49   43.79
   4  12  -1 1255.30   41.88
  -5 -12   1  414.38   15.46
   5  12  -1  291.65   11.37
  -6 -12   1  451.71   16.49
   6  12  -1  435.58   15.72
  -7 -12   1  778.62   26.78
   7  12  -1  669.53   23.11
  -8 -12   1  171.85    8.32
   8  12  -1  150.40    7.39
  -9 -12   1   78.74    6.00
   9  12  -1   77.60    5.95
 -10 -12   1   20.06    5.27
  10  12  -1   19.08    4.60
 -11 -12   1    7.24    4.34
  11  12  -1    0.93    4.03
 -12 -12   1   80.03    5.64
  12  12  -1   88.15    5.38
  12 -13   1   -0.78    4.24
 -12  13  -1    0.52    3.93
  11 -13   1  188.50    8.27
 -11  13  -1  203.65    8.69
  10 -13   1   97.61    6.00
 -10  13  -1   86.44    5.69
   9 -13   1 1318.90   44.00
  -9  13  -1 1182.92   39.60
   8 -13   1   70.16    5.58
  -8  13  -1   73.67    5.53
   7 -13   1  706.75   24.56
  -7  13  -1  671.08   23.32
   6 -13   1 1795.06   59.51
  -6  13  -1 1764.04   58.53
   5 -13   1 1211.36   40.74
  -5  13  -1 1191.71   39.96
   4 -13   1   14.11    5.02
  -4  13  -1   10.96    4.65
   3 -13   1   27.61    5.27
  -3  13  -1   19.08    4.60
   2 -13   1 1519.50   50.67
  -2  13  -1 1618.76   53.67
   1 -13   1 1674.60   55.68
  -1  13  -1 1556.72   51.70
   0 -13   1  311.09   12.25
   0  13  -1  290.41   11.43
  -1 -13   1  132.61    7.44
   1  13  -1  137.89    7.08
  -2 -13   1   -4.70    4.86
   2  13  -1    1.76    4.65
  -3 -13   1  597.67   21.09
   3  13  -1  551.13   19.49
  -4 -13   1  741.39   25.64
   4  13  -1  694.86   23.94
  -5 -13   1   32.52    4.96
   5  13  -1   32.68    4.91
  -6 -13   1  428.50   15.82
   6  13  -1  441.37   15.92
  -7 -13   1  443.85   16.29
   7  13  -1  375.35   13.96
  -8 -13   1  934.76   31.69
   8  13  -1  787.41   26.78
  -9 -13   1  461.74   16.60
   9  13  -1  408.18   14.68
 -10 -13   1  237.20    9.82
  10  13  -1  226.30    9.36
 -11 -13   1   36.97    4.60
  11  13  -1   31.18    4.50
  11 -14   1  173.92    7.65
 -11  14  -1  172.89    7.65
  10 -14   1    0.26    4.34
 -10  14  -1    1.96    4.39
   9 -14   1  621.96   21.51
  -9  14  -1  579.05   20.22
   8 -14   1 1527.77   50.67
  -8  14  -1 1449.18   48.13
   7 -14   1 1270.30   42.50
  -7  14  -1 1253.75   41.88
   6 -14   1  140.73    7.39
  -6  14  -1  147.45    7.44
   5 -14   1    4.81    5.12
  -5  14  -1    1.65    4.70
   4 -14   1  267.45   10.91
  -4  14  -1  255.97   10.29
   3 -14   1  194.96    9.05
  -3  14  -1  187.68    8.53
   2 -14   1   -1.81    4.86
  -2  14  -1   -2.79    4.29
   1 -14   1  644.20   22.70
  -1  14  -1  609.56   21.35
   0 -14   1 4417.86  144.50
   0  14  -1 4523.85  147.76
  -1 -14   1 3523.95  115.60
   1  14  -1 3773.15  123.46
  -2 -14   1 2861.66   94.10
   2  14  -1 2400.48   78.95
  -3 -14   1  508.27   18.25
   3  14  -1  582.67   20.37
  -4 -14   1    3.57    4.55
   4  14  -1    3.88    4.45
  -5 -14   1  208.05    9.36
   5  14  -1  197.65    8.58
  -6 -14   1  247.91   10.44
   6  14  -1  229.97    9.51
  -7 -14   1    7.60    4.70
   7  14  -1    4.34    4.39
  -8 -14   1  196.21    8.58
   8  14  -1  169.84    7.55
  -9 -14   1 1742.33   57.34
   9  14  -1 1520.53   50.15
 -10 -14   1  918.73   30.81
  10  14  -1  959.06   32.11
  10 -15   1  161.31    7.39
 -10  15  -1  157.22    7.13
   9 -15   1    5.38    4.34
  -9  15  -1    1.96    4.29
   8 -15   1   54.44    5.22
  -8  15  -1   60.90    5.02
   7 -15   1    0.88    4.55
  -7  15  -1    0.98    4.24
   6 -15   1  134.78    7.08
  -6  15  -1  119.64    6.26
   5 -15   1  102.68    6.20
  -5  15  -1   83.96    5.69
   4 -15   1    9.93    4.65
  -4  15  -1    2.22    4.60
   3 -15   1  324.06   12.56
  -3  15  -1  331.87   12.82
   2 -15   1   75.74    6.00
  -2  15  -1   76.98    5.69
   1 -15   1  331.61   12.93
  -1  15  -1  277.27   11.17
   0 -15   1  720.71   25.13
   0  15  -1  726.92   25.13
  -1 -15   1   -4.19    4.86
   1  15  -1   -2.38    4.55
  -2 -15   1    3.15    5.07
   2  15  -1    4.60    4.60
  -3 -15   1  140.47    7.60
   3  15  -1  122.38    6.72
  -4 -15   1   77.66    6.05
   4  15  -1   60.59    5.12
  -5 -15   1    0.36    4.70
   5  15  -1    4.81    4.24
  -6 -15   1    0.62    4.65
   6  15  -1   -0.98    4.39
  -7 -15   1  309.69   11.89
   7  15  -1  349.60   12.93
  -8 -15   1  376.18   13.55
   8  15  -1  377.57   13.60
  -9 -15   1  182.56    7.60
   9  15  -1  190.67    7.81
   8 -16   1  251.42    9.98
  -8  16  -1  262.54   10.39
   7 -16   1  322.05   12.25
  -7  16  -1  275.62   10.75
   6 -16   1   20.11    4.70
  -6  16  -1   27.76    4.45
   5 -16   1   12.36    4.65
  -5  16  -1   18.97    4.60
   4 -16   1   14.11    4.70
  -4  16  -1    6.57    4.45
   3 -16   1   19.90    4.86
  -3  16  -1   10.60    4.50
   2 -16   1   22.49    4.91
  -2  16  -1   24.14    4.96
   1 -16   1  219.78    9.36
  -1  16  -1  236.95    9.87
   0 -16   1 1384.04   46.17
   0  16  -1 1412.48   47.00
  -1 -16   1  934.24   31.69
   1  16  -1  849.45   28.95
  -2 -16   1  379.18   14.17
   2  16  -1  305.09   11.84
  -3 -16   1  317.91   12.36
   3  16  -1  317.81   12.10
  -4 -16   1  179.04    8.32
   4  16  -1  203.03    8.79
  -5 -16   1    9.20    4.34
   5  16  -1    3.72    4.39
  -6 -16   1   32.57    4.65
   6  16  -1   41.00    4.50
  -7 -16   1  228.16    9.15
   7  16  -1  214.09    8.63
   8  16  -1   38.98    4.50
   7 -17   1   37.02    4.65
  -7  17  -1   41.21    4.65
   6 -17   1  337.97   12.72
  -6  17  -1  329.44   12.25
   5 -17   1  157.17    7.44
  -5  17  -1  171.18    7.70
   4 -17   1   42.86    5.12
  -4  17  -1   48.75    4.96
   3 -17   1  132.51    6.88
  -3  17  -1  118.55    6.46
   2 -17   1  615.24   21.35
  -2  17  -1  466.09   16.60
   1 -17   1  685.04   23.63
  -1  17  -1  691.24   23.73
   0 -17   1 1478.14   49.06
   0  17  -1 1429.54   47.46
  -1 -17   1   -1.09    4.50
   1  17  -1   14.79    4.08
  -2 -17   1 1152.42   38.57
   2  17  -1 1072.80   35.98
  -3 -17   1  314.08   11.99
   3  17  -1  337.61   12.46
  -4 -17   1  272.26   10.60
   4  17  -1  341.33   12.62
  -5 -17   1  106.35    6.00
   5  17  -1   87.32    5.27
  -6 -17   1   12.20    4.14
   6  17  -1   14.99    4.08
   4 -18   1 1022.65   34.28
  -4  18  -1 1064.01   35.47
   3 -18   1  515.67   18.10
  -3  18  -1  513.13   17.94
   2 -18   1  820.50   27.87
  -2  18  -1  831.87   28.07
   1 -18   1  167.98    7.91
  -1  18  -1  186.33    8.01
   0 -18   1    4.08    4.29
   0  18  -1    0.47    4.03
  -1 -18   1   11.84    4.29
   1  18  -1    4.08    4.08
  -2 -18   1   51.24    5.07
   2  18  -1   64.73    4.96
  -3 -18   1  246.98    9.82
   3  18  -1  284.61   10.70
  -1  18   2    4.03    3.88
  -2  18   2   59.30    4.76
   4  17   2  123.51    6.31
  -4 -17  -2  134.06    6.46
   3  17   2   86.08    5.27
  -3 -17  -2   75.33    5.17
   2  17   2   23.32    3.98
  -2 -17  -2   25.54    4.08
   1  17   2   92.86    5.43
  -1 -17  -2   93.79    5.43
   0  17   2   -2.59    3.93
   0 -17  -2    6.36    4.29
  -1  17   2  127.13    6.20
   1 -17  -2  147.61    7.19
  -2  17   2  155.26    7.08
   2 -17  -2  168.08    7.70
  -3  17   2    0.16    4.24
   3 -17  -2   -0.21    4.39
  -4  17   2   62.40    5.07
   4 -17  -2   47.72    4.96
  -5  17   2   48.86    4.65
   5 -17  -2   60.70    5.07
  -6  17   2  109.09    6.00
   6 -17  -2  124.29    6.36
   6  16   2  323.91   11.89
  -6 -16  -2  340.71   12.46
   5  16   2   69.07    4.86
  -5 -16  -2   67.06    5.12
   4  16   2   12.41    4.29
  -4 -16  -2    7.76    4.34
  -3 -16  -2  149.42    7.24
   2  16   2  222.06    9.00
  -2 -16  -2  280.01   10.91
   1  16   2   23.27    4.34
  -1 -16  -2   37.17    4.70
   0  16   2   63.28    4.81
   0 -16  -2   77.71    5.43
  -1  16   2  468.77   16.65
   1 -16  -2  409.78   14.94
  -2  16   2  872.20   29.57
   2 -16  -2  791.03   26.99
  -3  16   2  212.03    9.05
   3 -16  -2  255.35   10.39
  -4  16   2    6.00    4.50
   4 -16  -2   -5.64    4.60
  -5  16   2  431.39   15.56
   5 -16  -2  450.94   16.18
  -6  16   2  260.47   10.29
   6 -16  -2  283.27   11.12
  -7  16   2   89.34    5.48
   7 -16  -2   90.99    5.84
  -8  16   2   67.83    4.91
   8 -16  -2   67.57    5.33
  -9  16   2  131.11    6.62
   7  15   2  179.56    8.01
  -7 -15  -2  197.86    8.38
   6  15   2   68.61    4.86
  -6 -15  -2   75.17    5.27
   5  15   2   16.54    4.34
  -5 -15  -2   17.63    4.50
   4  15   2  130.75    6.51
  -4 -15  -2  122.01    6.67
   3  15   2  113.64    6.26
  -3 -15  -2  105.73    6.46
   2  15   2  160.79    7.39
  -2 -15  -2  198.38    8.84
   1  15   2  170.30    7.81
  -1 -15  -2  164.20    7.96
   0  15   2 1015.41   34.17
   0 -15  -2 1239.28   41.57
  -1  15   2  476.58   17.01
   1 -15  -2  466.91   17.06
  -2  15   2   66.90    5.43
   2 -15  -2   83.45    6.15
  -3  15   2  277.84   11.06
   3 -15  -2  311.55   12.20
  -4  15   2  694.35   23.94
   4 -15  -2  762.07   26.21
  -5  15   2   98.90    6.05
   5 -15  -2   94.77    6.20
  -6  15   2   80.24    5.79
   6 -15  -2   70.78    5.69
  -7  15   2   12.67    4.24
   7 -15  -2   13.55    4.70
  -8  15   2  449.33   16.08
   8 -15  -2  501.14   17.79
  -9  15   2   20.58    4.39
   9 -15  -2   36.55    4.86
 -10  15   2  110.07    5.89
  10 -15  -2  112.04    6.15
   9  14   2  247.18    9.82
  -9 -14  -2  323.86   12.10
   8  14   2   21.09    4.45
  -8 -14  -2   23.21    4.65
   7  14   2   11.06    4.39
  -7 -14  -2    6.98    4.55
   6  14   2    4.70    4.39
  -6 -14  -2    1.29    4.55
   5  14   2    0.47    4.29
  -5 -14  -2    8.53    4.70
   4  14   2    4.55    4.34
  -4 -14  -2    6.10    4.70
   3  14   2   41.31    4.91
  -3 -14  -2   37.33    5.07
   1  14   2  627.13   21.77
  -1 -14  -2  716.06   24.76
   0  14   2    8.89    4.34
   0 -14  -2    2.69    4.50
  -1  14   2   73.36    5.33
   1 -14  -2   67.83    5.69
  -2  14   2   14.01    4.34
   2 -14  -2   30.09    5.12
  -3  14   2  156.19    7.44
   3 -14  -2  163.07    8.01
  -4  14   2  520.11   18.46
   4 -14  -2  479.01   17.32
  -5  14   2  477.67   17.27
   5 -14  -2  506.21   18.25
  -6  14   2  368.68   13.80
   6 -14  -2  360.10   13.75
  -7  14   2  357.57   13.39
   7 -14  -2  339.93   12.98
  -8  14   2    0.93    4.55
   8 -14  -2    7.96    4.50
  -9  14   2   62.35    4.91
   9 -14  -2   67.00    5.27
 -10  14   2   28.38    4.60
  10 -14  -2   27.71    4.91
 -11  14   2   17.11    4.29
  11 -14  -2   16.75    4.39
  10  13   2   89.29    5.69
 -10 -13  -2   97.25    6.36
   9  13   2 1280.12   42.55
  -9 -13  -2 1430.57   47.57
   8  13   2  628.17   21.71
  -8 -13  -2  671.08   23.37
   7  13   2  177.23    8.12
  -7 -13  -2  185.19    8.58
   6  13   2   28.23    4.86
  -6 -13  -2   28.33    4.86
   5  13   2   14.89    4.39
  -5 -13  -2   16.54    5.12
   4  13   2   21.51    4.50
  -4 -13  -2   25.49    4.96
   3  13   2  611.11   21.40
  -3 -13  -2  614.21   21.66
   2  13   2   82.26    5.69
  -2 -13  -2   71.09    5.64
   1  13   2   91.46    5.84
  -1 -13  -2  100.35    6.41
   0  13   2  304.83   11.58
   0 -13  -2  264.71   10.81
  -1  13   2    9.05    4.45
   1 -13  -2    9.41    4.86
  -2  13   2    1.55    4.14
   2 -13  -2   -1.40    4.65
  -3  13   2   65.30    5.02
   3 -13  -2   67.06    5.74
  -4  13   2   45.24    4.91
   4 -13  -2   41.41    5.17
  -5  13   2   12.51    4.50
   5 -13  -2   11.32    4.91
  -6  13   2  184.31    8.38
   6 -13  -2  183.80    8.58
  -7  13   2    0.36    4.60
   7 -13  -2    5.27    4.81
  -8  13   2  328.25   12.62
   8 -13  -2  349.24   13.29
  -9  13   2  186.28    8.53
   9 -13  -2  195.17    8.69
 -10  13   2   16.54    4.39
  10 -13  -2    8.07    4.65
 -11  13   2  232.91    9.51
  11 -13  -2  242.06    9.82
 -12  13   2   77.50    5.48
  12 -13  -2   86.50    5.69
  11  12   2  328.15   12.36
 -11 -12  -2  373.90   14.01
  10  12   2  292.32   11.27
 -10 -12  -2  276.60   11.27
   9  12   2  408.90   14.89
  -9 -12  -2  429.02   15.82
   8  12   2  606.97   21.20
  -8 -12  -2  636.96   22.33
   7  12   2 1173.10   39.34
  -7 -12  -2 1214.46   40.79
   6  12   2  652.99   22.80
  -6 -12  -2  688.14   24.04
   5  12   2    5.12    4.70
  -5 -12  -2    1.55    4.76
   4  12   2  779.65   26.78
  -4 -12  -2  764.14   26.26
   3  12   2  134.58    6.98
  -3 -12  -2  116.02    6.62
   2  12   2 1223.77   40.95
  -2 -12  -2 1362.32   45.50
   0  12   2   30.25    4.70
   0 -12  -2   37.17    4.86
  -1  12   2  445.46   16.03
   1 -12  -2  512.93   18.41
  -2  12   2  581.12   20.27
   2 -12  -2  701.58   24.30
  -3  12   2  196.98    8.53
   3 -12  -2  205.36    8.94
  -4  12   2  256.59   10.39
   4 -12  -2  247.08   10.29
  -5  12   2  826.18   28.13
   5 -12  -2  870.13   29.62
  -6  12   2 1633.76   54.18
   6 -12  -2 1708.21   56.72
  -7  12   2 1859.17   61.42
   7 -12  -2 2010.66   66.49
  -8  12   2 1136.91   38.16
   8 -12  -2 1164.31   39.24
  -9  12   2    4.91    4.65
   9 -12  -2   -0.52    4.60
 -10  12   2   15.56    4.76
  10 -12  -2   17.47    4.60
 -11  12   2   78.84    5.74
  11 -12  -2   75.79    5.33
 -12  12   2   20.42    4.50
  12 -12  -2   15.51    4.45
 -13  12   2   -6.77    4.14
  13 -12  -2   -2.02    4.24
  12  11   2  527.87   18.56
 -12 -11  -2  585.77   20.47
  11  11   2  453.16   16.34
 -11 -11  -2  532.00   19.13
  10  11   2  377.88   14.06
 -10 -11  -2  432.74   16.08
   9  11   2   81.12    5.95
  -9 -11  -2   72.02    6.05
   8  11   2    6.82    4.91
  -8 -11  -2    3.10    4.70
   7  11   2  159.39    7.86
  -7 -11  -2  185.71    8.84
   6  11   2 1530.35   51.08
  -6 -11  -2 1649.27   54.85
   5  11   2  613.69   21.56
  -5 -11  -2  628.17   22.02
   4  11   2 1730.44   57.39
  -4 -11  -2 1887.09   62.51
   3  11   2 1296.66   43.33
  -3 -11  -2 1208.77   40.59
   2  11   2  905.29   30.71
  -2 -11  -2  885.12   30.25
   1  11   2   10.96    4.14
  -1 -11  -2    9.46    4.50
   0  11   2  990.59   33.35
   0 -11  -2  993.18   33.61
  -1  11   2 1259.44   41.93
   1 -11  -2 1283.74   42.91
  -2  11   2  201.17    8.58
   2 -11  -2  194.86    8.48
  -3  11   2   83.81    5.33
   3 -11  -2   81.27    5.95
  -4  11   2 1233.07   41.21
   4 -11  -2 1298.22   43.58
  -5  11   2  103.35    6.00
   5 -11  -2  110.64    6.51
  -6  11   2   26.32    4.65
   6 -11  -2   18.35    4.65
  -7  11   2    2.53    4.19
   7 -11  -2   -0.57    4.50
  -8  11   2 1221.18   40.90
   8 -11  -2 1268.23   42.60
  -9  11   2  309.53   11.99
   9 -11  -2  286.63   11.53
 -10  11   2  553.20   19.65
  10 -11  -2  550.10   19.59
 -11  11   2  206.08    9.10
  11 -11  -2  199.88    8.69
 -12  11   2   24.14    4.55
  12 -11  -2   26.26    4.81
 -13  11   2   12.15    4.29
  13 -11  -2   16.91    4.55
 -14  11   2    3.10    4.14
  14 -11  -2   24.20    5.38
  14 -11  -2   15.87    4.19
  12  10   2   35.83    5.07
 -12 -10  -2   45.86    5.38
  11  10   2  125.79    6.88
 -11 -10  -2  121.03    6.88
  10  10   2    1.50    4.60
 -10 -10  -2   -4.55    4.76
   9  10   2  441.22   16.08
  -9 -10  -2  448.66   16.44
   8  10   2  767.24   26.47
  -8 -10  -2  827.22   28.49
   7  10   2   39.03    5.33
  -7 -10  -2   36.81    5.02
   6  10   2  735.19   25.49
  -6 -10  -2  838.59   28.75
   5  10   2 1631.69   54.18
  -5 -10  -2 1801.27   59.71
   4  10   2  135.77    7.24
  -4 -10  -2  154.90    7.91
   3  10   2  502.17   17.94
  -3 -10  -2  428.29   15.67
   2  10   2   90.74    5.58
  -2 -10  -2   96.27    6.15
   1  10   2 1759.39   58.11
  -1 -10  -2 1779.04   58.84
  -1  10   2   74.55    5.22
   1 -10  -2   49.48    4.91
  -2  10   2 3320.76  108.68
   2 -10  -2 3400.38  111.31
  -3  10   2 1053.15   35.36
   3 -10  -2 1087.27   36.55
  -4  10   2  392.77   14.32
   4 -10  -2  402.86   14.89
  -5  10   2  244.80    9.82
   5 -10  -2  266.16   10.70
  -6  10   2   80.14    5.58
   6 -10  -2   80.86    5.69
  -7  10   2   50.82    4.96
   7 -10  -2   48.03    5.17
  -8  10   2  330.27   12.67
   8 -10  -2  365.11   13.75
  -9  10   2  299.87   11.74
   9 -10  -2  289.47   11.48
 -10  10   2   35.11    4.81
  10 -10  -2   30.92    4.76
 -11  10   2  458.95   16.75
  11 -10  -2  472.13   17.06
 -12  10   2  214.56    9.15
  12 -10  -2  215.18    9.10
 -13  10   2   -5.79    4.29
  13 -10  -2    4.19    4.14
 -14  10   2   40.33    4.65
  14 -10  -2   32.99    4.60
  14 -10  -2   31.28    5.33
 -13  -9  -2  214.61    9.41
  12   9   2   33.76    4.96
  12   9   2   32.47    4.60
 -12  -9  -2   40.17    5.58
  11   9   2    3.72    5.07
 -11  -9  -2    2.43    4.96
  10   9   2  357.77   13.70
 -10  -9  -2  391.53   14.73
   9   9   2  254.99   10.55
  -9  -9  -2  284.92   11.74
   8   9   2   46.32    5.48
  -8  -9  -2   33.97    5.22
   7   9   2  293.40   11.79
  -7  -9  -2  280.89   11.53
   6   9   2 1210.32   40.64
  -6  -9  -2 1215.49   40.84
   5   9   2   97.15    6.10
  -5  -9  -2   90.79    6.05
   4   9   2 1142.08   38.31
  -4  -9  -2 1084.69   36.60
   3   9   2  612.14   21.35
  -3  -9  -2  579.05   20.32
   2   9   2  102.58    5.84
  -2  -9  -2   97.87    5.79
   1   9   2   18.04    4.14
  -1  -9  -2   24.51    4.70
   0   9   2  834.46   28.28
   0  -9  -2  777.07   26.47
  -1   9   2   21.15    3.93
   1  -9  -2   21.15    4.39
  -2   9   2 1963.61   64.73
   2  -9  -2 1871.58   61.73
  -3   9   2 1115.19   37.22
   3  -9  -2 1186.54   39.50
  -4   9   2 2475.45   81.27
   4  -9  -2 2553.00   83.76
  -5   9   2 1125.53   37.69
   5  -9  -2 1050.57   35.31
  -6   9   2    6.98    4.03
   6  -9  -2    0.83    4.24
  -7   9   2  602.84   20.94
   7  -9  -2  586.29   20.53
  -8   9   2   58.11    5.17
   8  -9  -2   63.02    5.17
  -9   9   2   34.02    4.81
   9  -9  -2   37.79    5.12
 -10   9   2  524.25   18.61
  10  -9  -2  613.18   21.56
 -11   9   2    7.55    4.55
  11  -9  -2    7.44    4.29
 -12   9   2    1.86    4.45
  12  -9  -2    4.03    4.76
 -13   9   2  106.09    6.41
  13  -9  -2   99.58    6.51
  13  -9  -2  100.71    6.05
 -14   9   2   83.39    5.53
  14  -9  -2   85.98    5.64
  14  -9  -2   94.25    6.31
 -15   9   2   33.40    4.70
  15  -9  -2   37.02    5.53
  15  -9  -2   31.64    4.50
  13   8   2    4.70    4.81
  13   8   2    0.98    4.24
 -13  -8  -2   -3.88    5.17
  12   8   2  267.45   10.55
  12   8   2  248.53    9.98
 -12  -8  -2  269.31   11.06
  11   8   2  534.59   19.03
 -11  -8  -2  530.97   19.03
  10   8   2   59.46    5.53
 -10  -8  -2   59.30    5.74
   9   8   2  188.14    8.79
  -9  -8  -2  213.27    9.72
   8   8   2 2698.80   88.82
  -8  -8  -2 3103.10  101.95
   7   8   2  141.71    7.50
  -7  -8  -2  140.06    7.44
   6   8   2  487.39   17.58
  -6  -8  -2  484.90   17.47
   5   8   2 3483.11  113.95
  -5  -8  -2 3554.97  116.43
   4   8   2   89.03    5.64
  -4  -8  -2   75.64    5.58
   3   8   2  428.81   15.30
  -3  -8  -2  520.63   18.35
   2   8   2 1720.10   56.82
  -2  -8  -2 1912.94   63.08
   1   8   2  230.79    9.36
  -1  -8  -2  245.01    9.67
   0   8   2  722.78   24.56
   0  -8  -2  787.93   26.78
  -1   8   2 4581.24  149.57
  -3   8   2 4182.10  136.54
   3  -8  -2 4011.49  131.06
  -4   8   2  139.59    6.67
   4  -8  -2  147.24    6.98
  -5   8   2  792.06   26.99
   5  -8  -2  854.62   28.95
  -6   8   2  434.03   15.56
   6  -8  -2  459.99   16.39
  -7   8   2  158.77    7.29
   7  -8  -2  152.67    7.44
  -8   8   2  576.98   20.27
   8  -8  -2  654.54   22.85
  -9   8   2    5.48    4.24
   9  -8  -2    7.29    4.24
 -10   8   2    5.53    4.55
  10  -8  -2    3.57    4.29
 -11   8   2 1638.41   54.34
  11  -8  -2 1776.45   59.09
 -12   8   2  769.83   26.42
  12  -8  -2  873.75   29.88
 -13   8   2  266.98   10.70
  13  -8  -2  264.40   11.01
  13  -8  -2  262.43   10.55
 -14   8   2   51.75    5.07
  14  -8  -2   43.79    5.38
  14  -8  -2   44.41    5.17
 -15   8   2   21.15    4.50
  15  -8  -2   17.58    5.38
  15  -8  -2   18.41    4.65
  14   7   2  310.62   11.79
  14   7   2  328.10   12.51
 -14  -7  -2  336.94   12.87
  13   7   2  384.71   14.32
  13   7   2  365.68   13.39
 -13  -7  -2  364.80   13.96
  12   7   2  112.24    6.41
  12   7   2  107.12    6.57
 -12  -7  -2   85.98    6.10
  11   7   2  175.99    8.32
  11   7   2  183.33    8.43
 -11  -7  -2  197.45    9.10
  10   7   2 1414.03   47.25
 -10  -7  -2 1486.41   49.79
   9   7   2 2561.27   84.27
  -9  -7  -2 3114.99  102.32
   8   7   2  656.09   22.90
  -8  -7  -2  795.68   27.45
   7   7   2  176.20    8.22
  -7  -7  -2  144.50    7.34
   6   7   2  630.24   21.92
  -6  -7  -2  661.26   23.11
   5   7   2   16.03    4.39
  -5  -7  -2   17.53    4.70
   4   7   2 1231.52   41.05
  -4  -7  -2 1447.11   48.13
   3   7   2  817.39   27.71
  -3  -7  -2  952.85   32.21
   2   7   2 1260.47   41.98
  -2  -7  -2 1155.00   38.57
   1   7   2 1465.73   48.50
  -1  -7  -2 1461.59   48.44
   0   7   2 5857.74  190.78
   0  -7  -2 4799.93  156.50
  -1   7   2 1984.29   65.25
   1  -7  -2 1795.58   59.15
  -2   7   2   39.76    4.55
   2  -7  -2   42.29    4.45
  -3   7   2  912.01   30.66
   3  -7  -2  916.14   30.81
  -4   7   2 6984.82  227.38
  -5   7   2  394.22   14.22
   5  -7  -2  364.80   13.44
  -6   7   2  142.64    6.93
   6  -7  -2  136.39    6.62
  -7   7   2  163.48    7.60
   7  -7  -2  156.81    7.29
  -8   7   2  822.05   28.02
   8  -7  -2  805.50   27.61
  -9   7   2  345.11   12.98
   9  -7  -2  383.47   14.27
 -10   7   2    6.31    4.29
  10  -7  -2    2.59    4.70
 -11   7   2  161.46    7.76
  11  -7  -2  189.17    8.58
 -12   7   2  595.60   20.89
  12  -7  -2  582.67   20.73
  12  -7  -2  626.10   22.08
 -13   7   2 2086.66   68.92
  13  -7  -2 2117.68   69.90
  13  -7  -2 2190.58   72.38
 -14   7   2  799.30   27.35
  14  -7  -2  834.97   28.64
  14  -7  -2  850.48   29.00
 -15   7   2   67.63    5.12
  15  -7  -2   78.22    5.64
  15  -7  -2   82.62    6.05
 -16   7   2    9.25    4.29
  16  -7  -2    5.53    5.07
  16  -7  -2    3.77    4.29
  14   6   2  218.13    9.00
  14   6   2  189.95    8.84
 -14  -6  -2  199.46    9.05
  13   6   2  137.89    7.44
  13   6   2  141.66    7.13
 -13  -6  -2  151.85    8.01
  12   6   2  151.48    7.60
  12   6   2  156.91    7.96
 -12  -6  -2  156.45    8.01
  11   6   2   89.86    6.26
  11   6   2   84.74    6.05
 -11  -6  -2   87.06    6.41
  10   6   2  320.08   12.72
  10   6   2  314.29   12.41
 -10  -6  -2  314.86   12.62
   9   6   2  120.93    6.72
  -9  -6  -2  114.62    6.88
   8   6   2   35.88    5.27
  -8  -6  -2   31.59    5.17
   7   6   2   11.63    4.65
  -7  -6  -2    4.65    4.55
   6   6   2  783.27   26.73
  -6  -6  -2  851.52   29.11
   5   6   2 4392.53  143.42
  -5  -6  -2 4600.37  150.24
   4   6   2    2.22    3.98
  -4  -6  -2   -3.10    3.98
   3   6   2  348.62   12.87
  -3  -6  -2  318.43   11.99
   2   6   2 3320.25  108.52
  -2  -6  -2 3491.89  114.10
   0   6   2 1279.60   42.45
   0  -6  -2 1282.19   42.60
  -1   6   2  389.88   13.96
   1  -6  -2  387.29   13.91
  -2   6   2  420.28   15.05
   2  -6  -2  510.24   17.79
  -3   6   2  351.31   12.87
   3  -6  -2  378.56   13.65
  -4   6   2   15.41    3.72
   4  -6  -2   19.49    4.39
  -5   6   2 1083.66   36.14
   5  -6  -2 1176.20   39.29
  -6   6   2  108.99    5.95
   6  -6  -2  105.78    5.95
  -7   6   2  753.29   25.70
   7  -6  -2  723.30   24.76
  -8   6   2  107.75    6.05
   8  -6  -2  135.20    6.77
  -9   6   2    4.45    4.08
   9  -6  -2    6.10    4.39
 -10   6   2 1550.00   51.49
  10  -6  -2 1637.38   54.39
 -11   6   2   63.80    5.33
  11  -6  -2   76.67    6.00
  11  -6  -2   72.74    6.15
 -12   6   2   21.56    4.65
  12  -6  -2   28.18    5.17
  12  -6  -2   30.25    5.58
 -13   6   2  188.30    8.63
  13  -6  -2  215.80    9.56
  13  -6  -2  203.39    9.51
 -14   6   2  236.89    9.82
  14  -6  -2  247.96   10.24
  14  -6  -2  243.51   10.39
 -15   6   2  165.70    7.70
  15  -6  -2  173.30    8.01
  15  -6  -2  179.45    8.63
 -16   6   2   68.35    5.27
  16  -6  -2   71.30    6.10
  16  -6  -2   77.24    5.64
  15   5   2   36.19    4.60
  15   5   2   24.45    4.81
  14   5   2    2.48    4.29
  14   5   2    8.74    5.17
 -14  -5  -2   -7.81    5.07
  13   5   2   60.28    5.22
  13   5   2   46.89    5.53
 -13  -5  -2   47.88    5.53
  12   5   2   11.68    4.96
  12   5   2    6.62    4.39
 -12  -5  -2    7.50    5.27
  11   5   2   -0.62    4.50
  11   5   2   -1.76    4.76
 -11  -5  -2   -0.67    5.22
  10   5   2  970.43   32.99
  10   5   2  968.88   32.93
 -10  -5  -2  896.50   30.81
  -9  -5  -2  334.61   13.08
   8   5   2    5.07    5.02
  -8  -5  -2   12.05    4.86
   7   5   2  530.97   18.87
  -7  -5  -2  526.32   18.82
   6   5   2  830.84   28.13
  -6  -5  -2  828.25   28.28
   5   5   2  107.33    5.89
  -5  -5  -2   99.73    5.89
   3   5   2  264.55   10.29
  -3  -5  -2  242.32    9.56
   1   5   2  401.72   14.32
  -1  -5  -2  431.08   15.30
   0   5   2 1344.75   44.46
   0  -5  -2 1488.99   49.22
  -1   5   2  156.03    6.98
   1  -5  -2  175.68    7.70
  -2   5   2    3.52    3.83
   2  -5  -2   13.24    4.24
  -3   5   2  340.09   12.77
   3  -5  -2  410.51   14.73
  -4   5   2 2741.19   89.75
   4  -5  -2 2867.34   93.89
  -5   5   2  857.20   28.85
   5  -5  -2 1005.59   33.66
  -6   5   2  677.80   23.06
   6  -5  -2  748.63   25.64
  -7   5   2  306.33   11.58
   7  -5  -2  323.86   12.20
  -8   5   2   98.28    5.74
   8  -5  -2  113.33    6.10
  -9   5   2  521.15   18.46
   9  -5  -2  559.41   19.75
 -10   5   2  402.96   14.63
  10  -5  -2  434.70   15.87
  10  -5  -2  445.30   16.34
 -11   5   2  313.21   12.05
  11  -5  -2  340.76   13.08
  11  -5  -2  338.18   13.18
 -12   5   2   82.20    5.74
  12  -5  -2   74.71    6.20
  12  -5  -2   82.98    6.00
 -13   5   2  237.93    9.98
  13  -5  -2  226.30    9.87
  13  -5  -2  233.28   10.39
 -14   5   2    2.38    4.76
  14  -5  -2   -1.03    4.45
  14  -5  -2   -0.93    5.02
 -15   5   2   11.37    4.55
  15  -5  -2   21.97    5.12
  15  -5  -2   19.39    4.70
  16  -5  -2    5.74    4.50
  16  -5  -2    8.22    5.07
  15   4   2  134.22    7.19
  15   4   2  139.95    6.93
  14   4   2   96.27    6.36
  14   4   2  100.97    6.10
  13   4   2  341.85   12.93
  13   4   2  334.40   12.67
 -13  -4  -2  333.89   13.13
  12   4   2  457.97   16.80
  12   4   2  486.87   17.58
 -12  -4  -2  457.09   16.85
  11   4   2 1251.68   41.93
  11   4   2 1167.93   39.24
 -11  -4  -2 1174.65   39.60
  10   4   2 1392.31   46.58
  10   4   2 1418.16   47.41
 -10  -4  -2 1425.92   47.72
   9   4   2  698.48   24.25
   9   4   2  667.46   23.32
  -9  -4  -2  629.20   22.18
   8   4   2  412.47   15.30
  -8  -4  -2  461.90   16.85
   7   4   2  772.41   26.26
  -7  -4  -2  833.42   28.49
   6   4   2  381.55   13.86
  -6  -4  -2  376.80   13.91
   5   4   2  257.01   10.08
  -5  -4  -2  237.83    9.51
   1   4   2 2298.12   75.33
  -1  -4  -2 2230.90   73.21
   0  -4  -2 3022.97   98.85
  -1   4   2   11.32    4.45
   1  -4  -2   15.15    4.29
  -2   4   2  849.97   28.69
   2  -4  -2  799.82   27.09
  -3   4   2  155.36    7.13
   3  -4  -2  151.33    7.34
  -4   4   2   13.03    4.03
   4  -4  -2   15.77    3.88
  -5   4   2  525.28   18.15
   5  -4  -2  548.55   19.13
  -7   4   2 4226.57  137.94
  -8   4   2 1434.19   47.67
   8  -4  -2 1643.58   54.39
  -9   4   2   94.97    5.74
   9  -4  -2  114.41    6.46
   9  -4  -2  106.09    6.31
 -10   4   2  235.76    9.67
  10  -4  -2  248.48   10.34
  10  -4  -2  245.84   10.34
 -11   4   2  652.47   22.59
  11  -4  -2  684.01   23.83
  11  -4  -2  673.15   23.42
 -12   4   2  141.71    7.29
 -13   4   2  145.44    7.24
  13  -4  -2  146.68    7.96
  13  -4  -2  139.08    7.55
 -14   4   2  398.93   14.73
  14  -4  -2  377.94   14.48
  14  -4  -2  430.93   15.87
  15  -4  -2  502.22   18.15
  15  -4  -2  499.85   17.84
  16  -4  -2  476.94   17.11
  16  -4  -2  515.20   18.20
  17  -4  -2  182.40    8.27
  17  -4  -2  181.01    7.96
  15   3   2  185.56    8.12
  15   3   2  196.93    9.00
  14   3   2  302.87   11.48
  14   3   2  282.03   11.53
  13   3   2  624.03   21.92
  13   3   2  627.13   21.77
  12   3   2  467.74   16.80
  12   3   2  422.86   15.72
 -12  -3  -2  411.13   15.41
  11   3   2   14.27    4.70
  11   3   2   18.04    5.02
 -11  -3  -2   22.49    5.43
  10   3   2  509.67   18.41
  10   3   2  489.09   17.63
 -10  -3  -2  510.86   18.56
   9   3   2 2513.71   82.77
   9   3   2 2434.61   80.14
  -9  -3  -2 2401.00   79.10
   8   3   2  419.71   15.41
   8   3   2  427.62   15.56
  -8  -3  -2  458.18   16.70
   7   3   2   16.70    4.03
   7   3   2   13.18    4.24
  -7  -3  -2   23.89    4.50
   6   3   2  708.31   24.14
  -6  -3  -2  705.72   24.25
   5   3   2 2860.62   93.63
  -5  -3  -2 2840.98   93.06
   3   3   2 1176.72   39.03
  -3  -3  -2 1258.92   41.77
   2   3   2 1932.59   63.49
  -2  -3  -2 1892.26   62.20
   1   3   2 1298.73   43.07
  -1  -3  -2 1184.99   39.40
   0   3   2 1925.35   63.33
   0  -3  -2 1839.53   60.59
  -1   3   2 2840.46   93.01
  -2   3   2 1143.63   38.21
   2  -3  -2 1155.00   38.57
  -3   3   2 1620.31   53.56
   3  -3  -2 1655.99   54.70
  -5   3   2  631.79   21.61
   5  -3  -2  625.58   21.40
  -6   3   2 4579.69  149.36
   6  -3  -2 5148.40  167.77
  -7   3   2  389.72   14.01
   7  -3  -2  390.50   14.11
  -8   3   2 1404.20   46.63
   8  -3  -2 1329.75   44.26
   8  -3  -2 1267.71   42.24
  -9   3   2 2758.77   90.43
   9  -3  -2 2759.29   90.53
   9  -3  -2 2725.68   89.44
 -10   3   2 1076.93   36.19
  10  -3  -2 1148.80   38.62
  10  -3  -2 1170.00   39.29
 -11   3   2 1369.05   45.55
  11  -3  -2 1474.00   49.12
  11  -3  -2 1462.11   48.75
 -12   3   2  720.71   24.87
  12  -3  -2  837.04   28.85
  12  -3  -2  791.54   27.25
 -13   3   2  302.04   11.84
  13  -3  -2  298.94   11.84
  13  -3  -2  320.65   12.87
  14  -3  -2   98.80    7.03
  14  -3  -2   96.42    6.46
  15  -3  -2   88.77    6.46
  15  -3  -2   97.04    6.26
  16  -3  -2    3.15    4.91
  16  -3  -2    1.81    4.34
  17  -3  -2   43.02    5.53
  17  -3  -2   58.68    4.91
  15   2   2   11.22    5.17
  15   2   2   23.11    4.50
  14   2   2   40.59    4.70
  14   2   2   36.19    5.43
  13   2   2  406.63   14.99
  13   2   2  411.44   15.30
  12   2   2  349.24   13.44
  12   2   2  323.08   12.41
  11   2   2  172.01    8.43
  11   2   2  161.62    7.86
 -11  -2  -2  173.10    8.12
  10   2   2    6.51    4.39
  10   2   2    3.21    4.86
 -10  -2  -2   -4.65    4.70
   9   2   2   27.61    4.55
   9   2   2   31.28    5.22
  -9  -2  -2   32.52    5.12
   8   2   2   41.05    4.70
   8   2   2   39.60    4.81
  -8  -2  -2   46.01    5.02
   7   2   2 1109.51   37.12
   7   2   2 1106.40   37.02
  -7  -2  -2 1139.49   38.16
  -6  -2  -2  661.26   22.70
   5   2   2   44.67    4.34
  -5  -2  -2   47.93    4.70
   4   2   2  613.18   20.94
  -4  -2  -2  643.68   21.97
   3   2   2 1247.03   41.26
  -3  -2  -2 1190.68   39.50
  -1   2   2 1073.83   35.62
   1  -2  -2 1222.21   40.43
  -3   2   2 2541.11   83.24
   3  -2  -2 3747.30  122.38
   4  -2  -2 3068.98  100.51
  -5   2   2 1685.97   55.48
   5  -2  -2 1639.44   54.08
  -6   2   2 4190.89  136.70
  -7   2   2  423.79   15.15
   7  -2  -2  453.83   16.03
   7  -2  -2  406.42   14.68
  -8   2   2   27.97    4.24
   8  -2  -2   20.37    4.39
   8  -2  -2   25.28    4.24
  -9   2   2 1785.24   58.99
   9  -2  -2 1804.37   59.61
   9  -2  -2 1740.78   57.49
 -10   2   2 2271.23   74.71
  10  -2  -2 2384.46   78.48
  10  -2  -2 2329.65   76.72
 -11   2   2  404.82   14.84
  11  -2  -2  423.12   15.56
  11  -2  -2  431.39   15.92
  12  -2  -2    8.69    5.33
  12  -2  -2   15.41    4.76
  13  -2  -2  645.75   22.65
  13  -2  -2  601.80   21.46
  14  -2  -2  359.99   13.75
  14  -2  -2  346.14   13.44
  15  -2  -2  198.89    9.31
  15  -2  -2  208.72    9.10
  16  -2  -2  317.65   11.94
  16  -2  -2  291.59   11.53
  17  -2  -2    9.72    5.07
  17  -2  -2    1.29    4.34
  16   1   2   47.72    5.53
  16   1   2   55.11    5.02
  15   1   2    1.19    4.45
  15   1   2    1.29    5.02
  14   1   2 1387.14   46.12
  14   1   2 1476.58   49.27
  13   1   2  865.99   29.47
  13   1   2  844.28   28.85
  12   1   2   52.68    5.33
  12   1   2   60.85    5.74
  11   1   2  251.06   10.60
  11   1   2  238.91   10.29
  10   1   2   63.75    5.48
  10   1   2   55.84    5.53
   9   1   2  671.08   23.27
   9   1   2  607.49   21.25
  -9  -1  -2  650.92   22.80
   8   1   2   18.10    4.81
   8   1   2   28.85    4.50
  -8  -1  -2   20.99    4.50
   7   1   2   -4.14    3.77
   7   1   2    1.03    3.88
  -7  -1  -2    3.62    3.98
   6   1   2 2043.23   67.21
   6   1   2 2000.83   65.92
  -6  -1  -2 2080.97   68.45
   5   1   2 1089.86   36.35
   5   1   2 1043.33   34.85
  -5  -1  -2 1239.28   41.21
   4   1   2 3444.33  112.40
  -4  -1  -2 3114.48  101.80
   3   1   2   97.51    5.22
  -3  -1  -2  108.42    5.53
   2   1   2  279.03   10.29
  -2  -1  -2  282.86   10.50
   1   1   2  262.90    9.51
  -1  -1  -2  252.30    9.36
  -1   1   2 1622.90   53.05
  -2   1   2 1616.69   53.05
   2  -1  -2 1333.89   43.95
  -3   1   2 1151.90   38.26
   3  -1  -2 1214.98   40.38
  -4   1   2    6.00    4.60
   4  -1  -2    5.95    4.50
  -6   1   2 1125.53   37.54
   6  -1  -2 1026.78   34.38
   6  -1  -2 1029.89   34.43
  -7   1   2 2940.24   96.22
   7  -1  -2 2940.24   96.22
   7  -1  -2 3044.68   99.58
  -8   1   2 2184.89   71.81
   8  -1  -2 2345.16   77.09
   8  -1  -2 2188.51   72.02
  -9   1   2   47.31    4.50
   9  -1  -2   50.98    4.81
   9  -1  -2   52.01    5.02
 -10   1   2  720.71   24.71
  10  -1  -2  761.56   26.11
  10  -1  -2  688.66   23.83
  11  -1  -2  119.07    7.08
  11  -1  -2  120.77    6.72
  12  -1  -2   31.02    5.27
  12  -1  -2   32.88    5.17
  13  -1  -2  213.78    9.67
  13  -1  -2  207.37    9.15
  14  -1  -2   21.09    4.96
  14  -1  -2   17.27    5.48
  15  -1  -2  114.83    6.62
  15  -1  -2  135.30    7.44
  16  -1  -2   61.11    5.17
  16  -1  -2   59.71    5.58
  17  -1  -2  141.71    6.88
  17  -1  -2  136.96    7.34
  16   0   2  379.95   13.70
  16   0   2  377.47   14.11
  15   0   2 1509.67   50.05
  15   0   2 1463.14   48.65
  14   0   2  814.81   27.66
  14   0   2  767.76   26.47
  13   0   2 1331.30   44.41
  13   0   2 1439.88   47.98
  12   0   2  331.66   12.72
  12   0   2  323.96   12.67
  11   0   2  974.57   33.04
  11   0   2  944.06   32.16
  10   0   2  295.99   11.63
  10   0   2  278.62   11.27
   9   0   2  566.13   19.96
   9   0   2  595.08   20.89
   8   0   2 2683.29   88.10
   8   0   2 2658.47   87.27
   6   0   2 3212.71  105.11
   6   0   2 3564.79  116.48
  -6   0  -2 3534.81  115.55
   5   0   2 1392.31   46.12
   5   0   2 1471.93   48.60
  -5   0  -2 1389.21   46.01
   4   0   2 1903.64   62.45
   4   0   2 1906.22   62.61
  -4   0  -2 1928.45   63.33
   3   0   2 1058.32   35.11
   3   0   2 1122.95   37.22
  -3   0  -2 1130.19   37.48
   2   0   2 1169.48   38.67
   2   0   2 1105.89   36.55
  -2   0  -2 1166.89   38.57
   1   0   2  419.61   14.17
  -1   0  -2  455.44   15.36
   0   0   2    1.24    1.14
   0   0  -2    2.53    1.29
  -3   0   2 1936.72   63.59
  -4   0   2 1550.00   51.24
   4   0  -2 1311.66   43.58
   4   0  -2 1450.22   48.03
  -5   0   2 1558.79   51.39
  -6   0   2  173.46    7.55
   6   0  -2  169.11    7.55
   6   0  -2  193.57    7.96
  -7   0   2 2340.51   76.78
   7   0  -2 2600.57   85.26
   7   0  -2 2590.23   84.89
   8   0  -2   23.89    4.03
   8   0  -2   17.94    3.72
   9   0  -2 4283.44  139.85
   9   0  -2 4400.80  143.63
  10   0  -2 3510.51  114.93
  10   0  -2 3171.35  103.97
  11   0  -2 4768.40  155.72
  11   0  -2 4454.57  145.59
  12   0  -2 1693.21   56.15
  12   0  -2 1715.96   57.03
  13   0  -2  576.47   20.63
  13   0  -2  536.66   19.28
  14   0  -2  129.87    7.50
  14   0  -2  119.64    6.72
  15   0  -2  128.63    6.93
  15   0  -2  113.79    7.08
  16   0  -2   84.89    6.20
  16   0  -2   76.00    5.48
  17   0  -2  215.23    9.41
  17   0  -2  224.07    9.20
  16  -1   2   46.17    4.86
  16  -1   2   55.11    5.74
  15  -1   2    7.44    5.17
  15  -1   2    0.26    4.50
  14  -1   2 1507.61   50.25
  14  -1   2 1418.16   47.10
  13  -1   2  924.93   31.43
  13  -1   2  858.76   29.31
  12  -1   2   57.44    5.64
  12  -1   2   52.37    5.48
  11  -1   2  254.78   10.81
  11  -1   2  239.74   10.24
  10  -1   2   55.11    5.27
  10  -1   2   53.15    5.74
   9  -1   2  619.38   21.56
   9  -1   2  682.97   23.63
   8  -1   2   26.94    4.19
   8  -1   2   26.37    4.60
   7  -1   2    3.88    3.46
   7  -1   2    6.00    3.93
   6  -1   2 1916.56   63.08
   6  -1   2 2061.84   67.83
   5  -1   2 1166.89   38.78
   5  -1   2 1186.54   39.40
   4  -1   2 3158.94  103.14
  -4   1  -2 3095.35  101.13
   3  -1   2  108.99    5.17
   3  -1   2  107.95    5.22
  -3   1  -2  108.11    5.07
   2  -1   2  291.75   10.44
   2  -1   2  294.64   10.55
  -2   1  -2  281.00   10.19
   1  -1   2  225.21    8.07
   1  -1   2  249.87    8.79
  -1   1  -2  236.89    8.32
   2   1  -2 1434.19   47.00
  -3  -1   2 1254.27   41.57
   3   1  -2 1265.64   41.98
   3   1  -2 1144.66   37.95
  -4  -1   2    7.19    4.96
   4   1  -2    5.12    4.70
   4   1  -2   10.91    4.91
  -5  -1   2   16.70    4.81
   5   1  -2   22.54    4.60
   5   1  -2   19.96    4.60
  -7  -1   2 3019.86   98.85
   7   1  -2 3106.72  101.59
   7   1  -2 2899.92   94.92
  -8  -1   2 2234.52   73.47
   8   1  -2 2141.98   70.47
   8   1  -2 2368.43   77.76
  -9  -1   2   51.80    5.17
   9   1  -2   48.34    4.65
   9   1  -2   52.32    5.07
  10   1  -2  701.58   24.20
  10   1  -2  711.92   24.61
  11   1  -2  132.98    7.34
  11   1  -2  126.87    6.82
  12   1  -2   37.90    4.96
  12   1  -2   32.47    5.27
  13   1  -2  216.68    9.46
  13   1  -2  216.32    9.87
  14   1  -2   20.06    4.86
  14   1  -2    7.50    5.12
  15   1  -2  129.25    6.93
  15   1  -2  112.66    6.67
  16   1  -2   55.89    5.07
  16   1  -2   63.90    5.64
  17   1  -2  137.63    6.88
  17   1  -2  145.33    7.55
  16  -2   2   45.96    5.48
  16  -2   2   42.34    4.60
  15  -2   2   23.99    4.81
  15  -2   2   22.18    5.43
  14  -2   2   48.13    5.22
  14  -2   2   45.14    5.84
  13  -2   2  407.15   14.94
  13  -2   2  406.99   14.99
  12  -2   2  347.54   13.29
  12  -2   2  353.58   13.55
  11  -2   2  172.53    8.32
  11  -2   2  184.83    8.89
  10  -2   2    1.60    4.60
  10  -2   2    0.93    4.70
   9  -2   2   19.70    4.55
   9  -2   2   26.42    4.76
   8  -2   2   41.98    4.50
   8  -2   2   38.31    4.96
   7  -2   2 1135.36   37.90
   7  -2   2 1122.95   37.48
  -7   2  -2 1038.16   34.74
   6  -2   2  610.59   20.94
   6  -2   2  635.41   21.82
  -6   2  -2  575.43   19.85
   5  -2   2   47.36    4.34
   5  -2   2   53.05    4.29
  -5   2  -2   34.54    3.72
   4  -2   2  633.34   21.51
   4  -2   2  605.42   20.58
  -4   2  -2  642.13   21.77
   3  -2   2 1330.27   43.84
  -3   2  -2 1282.71   42.34
   1   2  -2 1247.03   40.90
  -4  -2   2 2728.79   89.55
  -5  -2   2 1792.48   59.09
   5   2  -2 1665.29   54.85
  -7  -2   2  479.06   17.01
   7   2  -2  430.57   15.36
   7   2  -2  425.60   15.20
  -8  -2   2   19.96    4.50
   8   2  -2   18.51    3.93
   8   2  -2   14.27    4.29
  -9  -2   2 1699.42   56.30
   9   2  -2 1885.54   62.25
   9   2  -2 1766.63   58.32
 -10  -2   2 2189.03   72.23
  10   2  -2 2209.19   72.85
  10   2  -2 2320.86   76.41
 -11  -2   2  411.95   15.51
  11   2  -2  418.73   15.41
  11   2  -2  416.81   15.46
  12   2  -2   14.53    5.27
  12   2  -2   23.11    4.24
  13   2  -2  645.23   22.59
  13   2  -2  605.94   21.51
  14   2  -2  387.91   14.48
  14   2  -2  341.02   13.18
  15   2  -2  204.63    8.89
  15   2  -2  201.12    9.15
  16   2  -2  288.75   11.32
  16   2  -2  284.15   10.91
  17   2  -2    4.03    4.08
  17   2  -2    2.22    4.76
  16  -3   2    7.13    4.96
  16  -3   2    5.79    4.14
  15  -3   2  196.98    8.48
  15  -3   2  190.62    8.89
  14  -3   2  312.79   11.94
  14  -3   2  301.11   12.15
  13  -3   2  624.55   21.92
  13  -3   2  630.75   21.97
  12  -3   2  457.66   16.65
  12  -3   2  427.88   15.87
  11  -3   2   19.44    4.70
  11  -3   2   11.48    5.07
  10  -3   2  502.43   18.04
  10  -3   2  534.07   19.08
   9  -3   2 2386.52   78.64
   9  -3   2 2455.80   80.81
  -9   3  -2 2354.99   77.45
   8  -3   2  437.08   15.67
   8  -3   2  420.28   15.30
  -8   3  -2  419.81   14.99
   7  -3   2   18.04    4.14
   7  -3   2   15.82    4.14
  -7   3  -2   15.67    3.93
   6  -3   2  708.31   24.09
   6  -3   2  701.58   23.89
  -6   3  -2  647.30   22.13
   5  -3   2 2805.82   91.87
   5  -3   2 2729.30   89.39
  -5   3  -2 2807.37   91.82
   3  -3   2 1308.56   43.22
  -3   3  -2 1234.11   40.79
  -2   3  -2 1929.49   63.23
   1  -3   2 1325.10   43.64
  -1   3  -2 1311.14   43.27
   0  -3   2 2272.26   74.35
   1   3  -2 2314.66   75.74
  -2  -3   2 1124.50   37.43
   2   3  -2 1118.81   37.17
  -3  -3   2 1662.19   54.91
   3   3  -2 1683.91   55.63
  -4  -3   2    8.38    4.45
   4   3  -2    8.69    4.29
  -5  -3   2  685.56   23.37
   5   3  -2  735.19   24.97
  -6  -3   2 5594.06  182.25
  -8  -3   2 1364.39   45.39
  -9  -3   2 2924.22   95.91
   9   3  -2 2730.85   89.55
   9   3  -2 2814.09   92.29
 -10  -3   2 1150.87   38.72
  10   3  -2 1064.01   35.88
  10   3  -2 1034.02   34.90
 -11  -3   2 1453.84   48.55
  11   3  -2 1365.94   45.55
  11   3  -2 1413.51   47.20
 -12  -3   2  803.95   27.76
  12   3  -2  756.39   26.16
  12   3  -2  819.98   28.02
 -13  -3   2  272.52   11.37
  13   3  -2  290.25   11.63
  13   3  -2  293.61   11.79
  14   3  -2  108.11    6.51
  14   3  -2  106.14    6.41
  15   3  -2   79.72    5.74
  15   3  -2   96.99    6.36
  16   3  -2    2.79    4.91
  16   3  -2    0.88    4.03
  17   3  -2   52.42    5.02
  17   3  -2   55.99    4.81
  16  -4   2  368.37   13.34
  16  -4   2  376.13   13.86
  15  -4   2  143.94    7.03
  15  -4   2  158.62    8.01
  14  -4   2  109.04    6.36
  14  -4   2   88.41    6.51
  13  -4   2  374.06   13.96
  13  -4   2  372.30   13.96
  12  -4   2  447.94   16.34
  12  -4   2  462.31   16.85
  11  -4   2 1223.25   41.05
  11  -4   2 1215.49   40.90
  10  -4   2 1494.16   49.89
  10  -4   2 1442.98   48.13
 -10   4  -2 1459.01   48.55
   9  -4   2  670.05   23.37
   9  -4   2  668.50   23.16
  -9   4  -2  651.43   22.54
   8  -4   2  428.50   15.51
   8  -4   2  423.17   15.30
  -8   4  -2  404.15   14.58
   7  -4   2  846.86   28.75
   7  -4   2  832.91   28.33
  -7   4  -2  758.46   25.80
   6  -4   2  411.54   14.68
   6  -4   2  395.46   14.11
  -6   4  -2  420.43   14.89
   5  -4   2  267.14   10.13
  -5   4  -2  248.37    9.51
   1  -4   2 2224.18   72.85
  -1   4  -2 2631.59   86.03
  -1  -4   2   12.98    3.88
   1   4  -2   18.10    3.98
  -2  -4   2  846.86   28.49
   2   4  -2  867.03   29.11
  -3  -4   2  158.05    7.39
   3   4  -2  146.52    6.82
  -4  -4   2   15.15    4.34
   4   4  -2   20.37    3.72
  -5  -4   2  551.13   19.13
   5   4  -2  463.76   16.34
  -7  -4   2 4428.20  144.61
  -8  -4   2 1805.40   59.71
   8   4  -2 1683.91   55.63
  -9  -4   2  117.93    6.62
   9   4  -2  106.40    6.26
   9   4  -2   96.73    6.05
 -10  -4   2  247.96   10.24
  10   4  -2  249.97   10.19
  10   4  -2  243.77    9.82
 -11  -4   2  749.15   25.95
 -12  -4   2  137.37    7.50
  12   4  -2  140.37    7.19
  12   4  -2  147.14    7.91
 -13  -4   2  120.88    6.98
  13   4  -2  134.32    7.24
  13   4  -2  152.47    7.34
 -14  -4   2  417.43   15.67
  14   4  -2  414.80   15.30
  14   4  -2  425.19   15.61
  15   4  -2  478.49   17.11
  15   4  -2  460.19   16.49
  16   4  -2  478.03   16.75
  16   4  -2  482.53   17.16
  15  -5   2   33.35    4.65
  15  -5   2   26.37    5.43
  14  -5   2   10.19    4.65
  14  -5   2    4.45    5.17
  13  -5   2   50.36    5.02
  13  -5   2   52.22    5.69
  12  -5   2   -2.22    5.07
  12  -5   2    3.98    4.76
  11  -5   2    8.63    4.76
  11  -5   2   -0.26    4.86
 -11   5  -2   -2.84    4.24
  10  -5   2  875.30   29.93
  10  -5   2  898.57   30.66
 -10   5  -2  894.95   30.35
   9  -5   2  343.50   13.03
   9  -5   2  318.53   12.46
  -9   5  -2  336.99   12.62
   8  -5   2    8.84    4.14
   8  -5   2    3.83    4.39
  -8   5  -2   19.23    3.93
   7  -5   2  590.43   20.63
   7  -5   2  550.62   19.28
  -7   5  -2  517.53   18.10
   6  -5   2  863.41   29.11
  -6   5  -2  845.31   28.54
   5  -5   2  104.38    5.64
  -5   5  -2  111.11    5.74
   3  -5   2  267.04   10.13
  -3   5  -2  276.76   10.24
   1  -5   2  425.29   14.89
  -1   5  -2  421.88   14.79
   0  -5   2 1455.39   48.03
   0   5  -2 1613.08   53.05
  -1  -5   2  178.78    7.60
   1   5  -2  171.49    7.24
  -2  -5   2    4.81    3.88
   2   5  -2    5.95    3.67
  -3  -5   2  403.37   14.53
   3   5  -2  320.13   11.68
  -4  -5   2 2587.12   84.79
   4   5  -2 2785.66   91.15
  -5  -5   2  940.96   31.69
   5   5  -2  917.70   30.87
  -6  -5   2  767.24   26.21
   6   5  -2  716.06   24.45
  -7  -5   2  366.15   13.60
   7   5  -2  292.89   11.17
  -8  -5   2  125.84    6.93
   8   5  -2  117.72    6.31
  -9  -5   2  525.28   18.72
   9   5  -2  579.57   20.27
 -10  -5   2  456.11   16.70
  10   5  -2  433.88   15.72
  10   5  -2  457.09   16.54
 -11  -5   2  365.42   14.06
  11   5  -2  347.90   13.24
  11   5  -2  324.58   12.62
 -12  -5   2   69.18    6.05
  12   5  -2   74.45    5.69
  12   5  -2   83.19    6.00
 -13  -5   2  225.83   10.13
  13   5  -2  236.38   10.03
  13   5  -2  222.26    9.77
 -14  -5   2   -8.38    5.17
  14   5  -2   -0.05    4.60
  14   5  -2    1.14    4.86
 -15  -5   2    7.76    5.12
  15   5  -2   13.80    4.50
  15   5  -2   13.08    4.91
  16   5  -2    4.29    4.86
  16   5  -2    5.22    3.72
  15  -6   2  222.00    9.62
  15  -6   2  210.01    8.79
  14  -6   2  213.63    9.00
  14  -6   2  190.11    8.69
  13  -6   2  147.30    7.44
  13  -6   2  153.55    7.86
  12  -6   2  160.69    7.91
  12  -6   2  145.95    7.81
 -12   6  -2  144.71    7.08
  11  -6   2   85.93    6.10
  11  -6   2   85.51    6.46
 -11   6  -2   88.62    5.79
  10  -6   2  326.34   12.77
  10  -6   2  329.90   12.82
 -10   6  -2  321.22   12.15
  -9   6  -2  108.31    6.00
   8  -6   2   45.08    5.12
   8  -6   2   37.07    4.86
  -8   6  -2   31.74    4.14
   7  -6   2    9.77    4.29
  -7   6  -2    8.43    3.62
   6  -6   2  799.82   27.19
  -6   6  -2  816.36   27.66
   5  -6   2 4718.25  153.91
  -5   6  -2 4587.44  149.62
   4  -6   2    1.71    3.62
  -4   6  -2    4.34    3.52
   3  -6   2  350.43   12.77
  -3   6  -2  328.25   11.94
  -2   6  -2 3686.29  120.31
  -1   6  -2 6834.89  222.37
   0  -6   2 1404.20   46.48
   0   6  -2 1480.20   48.91
  -1  -6   2  389.57   13.96
   1   6  -2  387.60   13.80
  -2  -6   2  380.88   13.80
   2   6  -2  434.86   15.36
  -3  -6   2  336.47   12.46
   3   6  -2  328.92   11.99
  -4  -6   2   22.39    4.34
   4   6  -2   10.81    4.08
  -5  -6   2 1119.85   37.48
   5   6  -2 1099.17   36.71
  -6  -6   2  112.40    6.41
   6   6  -2  109.14    6.05
  -7  -6   2  794.13   27.09
   7   6  -2  754.84   25.75
  -8  -6   2  120.31    6.72
   8   6  -2  107.80    6.31
  -9  -6   2    3.57    4.81
   9   6  -2    6.20    4.50
 -10  -6   2 1696.83   56.41
  10   6  -2 1806.44   59.77
 -11  -6   2   85.15    5.89
  11   6  -2   63.54    4.81
  11   6  -2   67.06    6.00
 -12  -6   2   29.16    5.43
  12   6  -2   26.26    4.86
  12   6  -2   16.34    5.12
 -13  -6   2  205.46    9.51
  13   6  -2  201.89    8.89
  13   6  -2  196.31    8.94
 -14  -6   2  212.39    9.36
  14   6  -2  239.94    9.82
  14   6  -2  245.79   10.34
 -15  -6   2  169.48    8.22
  15   6  -2  154.17    7.39
  15   6  -2  176.25    7.86
 -16  -6   2   68.30    5.69
  16   6  -2   68.04    5.27
  16   6  -2   52.63    4.70
  15  -7   2   38.67    4.81
  15  -7   2   23.63    5.22
  14  -7   2  336.94   12.51
  14  -7   2  344.69   13.34
  13  -7   2  403.11   15.15
  13  -7   2  377.63   14.01
 -13   7  -2  345.16   12.87
  12  -7   2  117.72    6.67
  12  -7   2   99.16    6.72
 -12   7  -2  107.38    6.10
  11  -7   2  177.28    8.63
  11  -7   2  191.09    8.79
 -11   7  -2  180.59    8.07
  10  -7   2 1462.63   48.81
  10  -7   2 1552.59   51.70
 -10   7  -2 1435.74   47.82
   9  -7   2 2886.99   94.87
   9  -7   2 2837.88   93.27
  -9   7  -2 2694.66   88.46
   8  -7   2  773.97   26.57
  -8   7  -2  757.94   25.95
   7  -7   2  178.94    7.96
  -7   7  -2  182.35    7.86
   6  -7   2  632.82   21.82
  -6   7  -2  635.92   21.92
   5  -7   2   13.55    3.88
  -5   7  -2   14.06    3.83
   4  -7   2 1320.45   43.84
  -4   7  -2 1209.29   40.28
   3  -7   2  853.59   28.80
  -3   7  -2  859.27   28.95
   2  -7   2 1286.32   42.76
  -2   7  -2 1193.26   39.71
   1  -7   2 1378.35   45.76
  -1   7  -2 1340.09   44.46
  -1  -7   2 1885.54   62.14
   1   7  -2 1752.15   57.75
  -2  -7   2   30.61    4.34
   2   7  -2   30.66    4.08
  -3  -7   2 1010.24   33.86
   3   7  -2  904.77   30.45
   4   7  -2 7563.88  246.20
  -5  -7   2  440.96   15.98
   5   7  -2  408.34   14.79
  -6  -7   2  153.35    7.34
   6   7  -2  143.68    6.88
  -7  -7   2  182.97    8.22
   7   7  -2  160.48    7.39
  -8  -7   2  868.06   29.68
   8   7  -2  837.04   28.54
  -9  -7   2  320.96   12.56
   9   7  -2  440.70   16.03
 -10  -7   2   12.46    5.12
  10   7  -2    3.72    4.91
 -11  -7   2  178.83    8.43
  11   7  -2  182.25    8.53
 -12  -7   2  617.31   21.87
  12   7  -2  624.55   21.82
  12   7  -2  557.86   19.90
 -13  -7   2 2140.43   70.62
  13   7  -2 2000.83   65.97
  13   7  -2 2223.67   73.21
 -14  -7   2  801.88   27.51
  14   7  -2  776.03   26.42
  14   7  -2  727.95   25.02
 -15  -7   2   67.52    5.74
  15   7  -2   60.44    5.48
  15   7  -2   66.59    5.02
  15  -8   2  317.29   12.36
  15  -8   2  332.44   12.25
  14  -8   2  106.81    6.05
  14  -8   2  100.25    6.57
 -14   8  -2  111.52    6.10
  13  -8   2    4.76    5.38
  13  -8   2   -0.98    4.45
 -13   8  -2    6.00    4.19
  12  -8   2  288.23   11.22
  12  -8   2  273.76   11.12
 -12   8  -2  277.64   10.86
  11  -8   2  563.54   19.96
  11  -8   2  561.99   19.75
 -11   8  -2  521.15   18.51
  10  -8   2   58.32    5.74
  10  -8   2   62.30    5.33
 -10   8  -2   65.97    5.38
   9  -8   2  201.27    8.89
  -9   8  -2  178.11    8.01
   8  -8   2 2728.27   89.70
  -8   8  -2 2656.92   87.27
   7  -8   2  126.87    6.67
  -7   8  -2  129.67    6.57
   6  -8   2  503.98   17.84
  -6   8  -2  476.22   16.91
   5  -8   2 3624.77  118.55
  -5   8  -2 3584.96  117.26
   4  -8   2   86.60    5.22
  -4   8  -2   92.55    5.53
   3  -8   2  469.65   16.54
  -3   8  -2  476.12   16.80
   2  -8   2 2082.52   68.50
  -2   8  -2 1883.47   62.04
   1  -8   2  237.26    9.46
  -1   8  -2  254.42    9.87
   0  -8   2  751.73   25.70
   0   8  -2  736.74   25.08
  -1  -8   2 4028.55  131.63
  -3  -8   2 4356.85  142.28
   3   8  -2 4320.66  140.99
  -4  -8   2  134.11    6.88
   4   8  -2  148.07    7.13
  -5  -8   2  849.45   28.85
   5   8  -2  738.81   25.23
  -6  -8   2  426.28   15.51
   6   8  -2  445.04   16.03
  -7  -8   2  160.38    7.55
   7   8  -2  160.89    7.81
  -8  -8   2  603.35   21.25
   8   8  -2  656.60   22.70
  -9  -8   2    1.55    4.39
   9   8  -2   11.12    4.60
 -11  -8   2 1578.44   52.58
  11   8  -2 1682.87   55.84
 -12  -8   2  748.12   25.90
  12   8  -2  816.36   27.87
  12   8  -2  800.33   27.45
 -13  -8   2  242.69   10.19
  13   8  -2  250.44   10.13
  13   8  -2  249.56   10.03
 -14  -8   2   48.81    4.65
  14   8  -2   46.17    4.50
  14   8  -2   40.12    4.76
 -15  -8   2   23.83    4.55
  15   8  -2   18.41    3.72
  15   8  -2   24.45    4.60
  14  -9   2  715.54   24.30
  14  -9   2  740.88   25.44
 -14   9  -2  715.54   24.30
  13  -9   2  185.19    8.74
  13  -9   2  189.28    8.22
 -13   9  -2  190.52    8.32
  12  -9   2   39.86    5.58
  12  -9   2   29.37    4.60
 -12   9  -2   27.92    4.45
  11  -9   2    4.34    4.91
  11  -9   2    8.32    4.50
 -11   9  -2    6.46    4.29
  10  -9   2  396.81   14.63
  10  -9   2  390.60   14.48
 -10   9  -2  354.15   13.29
   9  -9   2  270.97   10.86
  -9   9  -2  249.10   10.19
   8  -9   2   43.58    5.12
  -8   9  -2   38.00    4.81
   7  -9   2  286.32   11.37
  -7   9  -2  263.99   10.60
   6  -9   2 1182.40   39.71
  -6   9  -2 1133.29   38.00
   5  -9   2   95.08    5.79
  -5   9  -2   87.22    5.43
   4  -9   2 1214.46   40.59
  -4   9  -2 1165.86   38.98
   3  -9   2  631.79   21.82
  -3   9  -2  660.22   22.75
   2  -9   2   94.51    5.48
  -2   9  -2   98.23    5.64
   1  -9   2   32.62    4.29
  -1   9  -2   34.12    4.24
   0  -9   2  873.23   29.57
   0   9  -2  777.07   26.42
  -1  -9   2   15.05    4.14
   1   9  -2   19.54    3.93
  -2  -9   2 2153.87   70.93
   2   9  -2 2063.39   67.88
  -3  -9   2 1116.74   37.38
   3   9  -2 1086.24   36.40
  -4  -9   2 2415.99   79.41
   4   9  -2 2328.62   76.57
  -5  -9   2 1144.66   38.47
   5   9  -2 1133.29   38.05
  -6  -9   2    5.69    4.55
   6   9  -2   -2.07    4.34
  -7  -9   2  608.01   21.35
   7   9  -2  591.98   20.68
  -8  -9   2   58.73    5.53
   8   9  -2   55.68    5.07
  -9  -9   2   35.88    5.48
   9   9  -2   31.23    4.91
 -10  -9   2  583.19   20.68
  10   9  -2  584.74   20.53
 -11  -9   2    7.55    5.17
  11   9  -2    5.84    4.39
 -12  -9   2    1.76    4.45
  12   9  -2    1.09    4.50
 -13  -9   2   99.27    6.41
  13   9  -2   87.74    5.74
  13   9  -2   98.44    5.89
 -14  -9   2   88.05    5.38
  14   9  -2   79.83    4.70
  14   9  -2   77.60    5.43
  14 -10   2   61.94    5.79
  14 -10   2   54.80    4.76
 -14  10  -2   50.25    4.60
  13 -10   2  322.67   12.05
  13 -10   2  309.53   12.25
 -13  10  -2  299.76   11.32
  12 -10   2   43.27    5.58
  12 -10   2   48.96    4.81
 -12  10  -2   32.68    4.76
  11 -10   2  133.23    7.29
  11 -10   2  136.85    7.03
 -11  10  -2  119.02    6.41
  10 -10   2   -7.96    4.08
 -10  10  -2    3.10    4.14
   9 -10   2  404.61   14.89
  -9  10  -2  397.69   14.68
   8 -10   2  862.89   29.47
  -8  10  -2  829.29   28.38
   7 -10   2   41.93    5.12
  -7  10  -2   29.93    4.70
   6 -10   2  830.84   28.44
  -6  10  -2  796.71   27.19
   5 -10   2 1534.49   51.03
  -5  10  -2 1542.24   51.18
   4 -10   2  146.73    7.34
  -4  10  -2  149.99    7.19
   3 -10   2  446.08   16.13
  -3  10  -2  497.83   17.58
   2 -10   2  104.69    6.05
  -2  10  -2  103.04    5.95
   1 -10   2 1673.57   55.53
  -1  10  -2 1680.29   55.58
   0 -10   2  174.75    8.01
   0  10  -2  173.87    7.70
  -1 -10   2   64.99    5.12
   1  10  -2   57.39    4.96
  -2 -10   2 3458.81  113.28
   2  10  -2 3339.38  109.30
  -3 -10   2 1205.15   40.48
   3  10  -2 1293.56   43.12
  -4 -10   2  373.28   14.01
   4  10  -2  386.31   14.32
  -5 -10   2  197.34    9.00
   5  10  -2  209.49    9.00
  -6 -10   2  100.35    6.41
   6  10  -2   77.34    5.64
  -7 -10   2   50.05    5.38
   7  10  -2   28.38    4.81
  -8 -10   2  344.48   13.29
   8  10  -2  351.36   13.34
  -9 -10   2  277.53   11.01
   9  10  -2  269.00   10.70
 -10 -10   2   46.32    4.86
  10  10  -2   40.02    5.22
 -12 -10   2  198.84    8.89
  12  10  -2  209.03    8.94
 -13 -10   2    5.58    4.45
  13  10  -2    1.50    4.24
  13  10  -2    3.41    3.00
 -14 -10   2   32.16    4.55
  14  10  -2   34.85    4.29
  14  10  -2   34.02    3.88
  13 -11   2  402.91   14.89
  13 -11   2  419.45   14.94
 -13  11  -2  401.72   14.42
  12 -11   2  572.33   20.27
  12 -11   2  566.64   19.75
 -12  11  -2  521.15   18.35
  11 -11   2  524.25   18.66
  11 -11   2  507.55   17.94
 -11  11  -2  505.17   17.89
  10 -11   2  422.19   15.36
 -10  11  -2  408.18   14.79
   9 -11   2   99.73    6.15
  -9  11  -2   82.62    5.58
   8 -11   2    5.07    4.45
  -8  11  -2    5.33    4.39
   7 -11   2  190.93    8.63
  -7  11  -2  151.17    7.44
   6 -11   2 1670.46   55.53
  -6  11  -2 1629.10   54.08
   5 -11   2  651.43   22.85
  -5  11  -2  634.89   22.13
   4 -11   2 1922.25   63.64
  -4  11  -2 1866.41   61.68
   3 -11   2 1290.98   43.22
  -3  11  -2 1318.90   43.95
   2 -11   2 1039.71   35.16
  -2  11  -2  943.55   31.85
   1 -11   2   10.70    4.50
  -1  11  -2   20.53    4.24
   0 -11   2 1190.68   39.96
   0  11  -2  987.49   33.24
  -1 -11   2 1329.24   44.41
   1  11  -2 1244.96   41.57
  -2 -11   2  232.34    9.93
   2  11  -2  207.99    8.84
  -3 -11   2  105.37    6.51
   3  11  -2   90.63    5.69
  -4 -11   2 1083.66   36.66
   4  11  -2 1323.55   44.15
  -5 -11   2  100.46    6.26
   5  11  -2   96.63    5.84
  -6 -11   2   30.61    5.12
   6  11  -2   18.72    4.55
  -7 -11   2   -1.09    4.65
   7  11  -2    1.91    4.50
  -8 -11   2 1193.26   40.12
   8  11  -2 1055.74   35.52
  -9 -11   2  298.47   11.94
   9  11  -2  291.96   11.53
 -10 -11   2  552.69   19.75
  10  11  -2  522.70   18.56
 -11 -11   2  198.69    8.79
  11  11  -2  172.22    8.07
 -12 -11   2   28.90    4.81
  12  11  -2   22.28    4.50
 -13 -11   2   16.34    4.45
  13  11  -2   12.77    4.03
  12 -12   2  592.49   20.42
  12 -12   2  596.11   20.84
 -12  12  -2  622.48   21.46
  11 -12   2  352.76   13.03
 -11  12  -2  342.99   12.87
  10 -12   2  312.33   12.05
 -10  12  -2  287.10   11.06
   9 -12   2  466.81   16.70
  -9  12  -2  435.01   15.72
   8 -12   2  690.21   23.89
  -8  12  -2  646.26   22.44
   7 -12   2 1324.07   44.26
  -7  12  -2 1337.51   44.72
   6 -12   2  763.11   26.37
  -6  12  -2  742.43   25.59
   5 -12   2    7.44    4.81
  -5  12  -2    6.88    4.34
   4 -12   2  766.73   26.52
  -4  12  -2  793.61   27.14
   3 -12   2  141.14    7.24
  -3  12  -2  121.24    6.67
   2 -12   2 1406.27   47.00
  -2  12  -2 1227.90   41.10
   1 -12   2  332.85   12.93
  -1  12  -2  312.12   12.05
   0 -12   2   34.85    5.22
   0  12  -2   30.87    4.60
  -1 -12   2  560.96   20.01
   1  12  -2  492.45   17.42
  -2 -12   2  764.66   26.37
   2  12  -2  694.35   23.99
  -3 -12   2  219.26    9.41
   3  12  -2  217.14    9.15
  -4 -12   2  255.20   10.60
   4  12  -2  259.80   10.55
  -5 -12   2  787.41   27.19
   5  12  -2  940.44   31.95
  -6 -12   2 1760.42   58.42
   6  12  -2 1801.78   59.61
  -7 -12   2 1960.51   64.94
   7  12  -2 1920.18   63.39
  -8 -12   2 1179.30   39.76
   8  12  -2 1142.08   38.36
  -9 -12   2   11.79    5.02
   9  12  -2   12.67    4.65
 -10 -12   2   26.68    5.02
  10  12  -2    8.17    4.55
 -11 -12   2   69.07    5.22
  11  12  -2   71.14    5.02
  12 -13   2   29.31    5.17
  12 -13   2   24.76    4.24
 -12  13  -2   24.71    4.19
  11 -13   2  150.40    7.08
 -11  13  -2  158.10    7.24
  10 -13   2   91.61    6.00
 -10  13  -2   97.92    5.89
   9 -13   2 1446.60   48.08
  -9  13  -2 1417.13   47.10
   8 -13   2  735.71   25.28
  -8  13  -2  647.30   22.39
   7 -13   2  189.69    8.43
  -7  13  -2  211.61    9.15
   6 -13   2   20.53    4.96
  -6  13  -2   27.04    4.70
   5 -13   2   17.84    4.76
  -5  13  -2   21.97    4.76
   4 -13   2   23.89    5.38
  -4  13  -2   26.26    4.70
   3 -13   2  690.21   24.14
  -3  13  -2  654.02   22.75
   2 -13   2   83.76    6.10
  -2  13  -2   83.08    5.69
   1 -13   2  123.26    7.03
  -1  13  -2  100.46    6.20
   0 -13   2  289.01   11.58
   0  13  -2  280.89   11.01
  -1 -13   2   16.34    5.02
   1  13  -2   12.72    4.70
  -2 -13   2    0.57    4.60
   2  13  -2   -4.65    4.39
  -3 -13   2   82.41    6.15
   3  13  -2   80.86    5.69
  -4 -13   2   43.95    5.27
   4  13  -2   42.55    4.91
  -5 -13   2   23.94    5.22
   5  13  -2   18.10    4.70
  -6 -13   2  190.00    8.89
   6  13  -2  171.34    8.07
  -7 -13   2   16.70    5.17
   7  13  -2   14.01    4.55
  -8 -13   2  326.34   12.67
   8  13  -2  296.51   11.58
  -9 -13   2  187.26    8.53
   9  13  -2  189.59    8.48
 -10 -13   2    9.87    4.55
  10  13  -2    4.60    3.98
 -11 -13   2  228.11    9.05
  11  13  -2  196.72    8.22
 -12 -13   2   62.51    5.17
  12  13  -2   49.43    4.70
  11 -14   2   50.51    4.86
 -11  14  -2   40.33    4.39
  10 -14   2   68.61    5.22
 -10  14  -2   68.81    5.27
   9 -14   2  294.28   11.32
  -9  14  -2  307.00   11.74
   8 -14   2   27.45    4.70
  -8  14  -2   25.85    4.50
   7 -14   2    5.48    4.60
  -7  14  -2    9.72    4.55
   6 -14   2    2.90    4.50
  -6  14  -2   13.65    4.45
   5 -14   2    4.96    4.60
  -5  14  -2    9.62    4.50
   4 -14   2    7.19    4.60
  -4  14  -2    5.74    4.60
   3 -14   2   55.58    5.69
  -3  14  -2   48.39    5.22
   2 -14   2 1174.13   39.50
  -2  14  -2  994.21   33.66
   1 -14   2  693.31   24.25
  -1  14  -2  680.39   23.58
   0 -14   2    8.94    5.02
   0  14  -2    9.36    4.50
  -1 -14   2   76.21    6.10
   1  14  -2   77.81    5.58
  -2 -14   2   28.95    5.33
   2  14  -2   32.36    4.91
  -3 -14   2  171.96    8.27
   3  14  -2  165.19    7.76
  -4 -14   2  490.33   17.84
   4  14  -2  479.48   17.11
  -5 -14   2  390.60   14.84
   5  14  -2  458.59   16.54
  -6 -14   2  352.65   13.65
   6  14  -2  332.70   12.77
  -7 -14   2  368.58   13.96
   7  14  -2  328.25   12.62
  -8 -14   2   -0.67    4.70
   8  14  -2    7.91    4.14
  -9 -14   2   69.07    5.27
   9  14  -2   66.18    5.33
 -10 -14   2   32.68    4.50
  10  14  -2   26.37    4.45
 -11 -14   2   18.56    4.19
  11  14  -2   11.58    3.93
  10 -15   2  403.17   14.37
 -10  15  -2  443.18   15.56
   9 -15   2  851.00   28.75
  -9  15  -2  831.35   28.13
   8 -15   2  531.49   18.66
  -8  15  -2  527.35   18.61
   7 -15   2  217.66    9.20
  -7  15  -2  215.18    9.00
   6 -15   2   78.95    5.89
  -6  15  -2   71.76    5.38
   5 -15   2   35.62    4.91
  -5  15  -2   26.83    4.70
   4 -15   2  147.50    7.44
  -4  15  -2  141.09    7.13
   3 -15   2  125.43    7.03
  -3  15  -2  110.74    6.46
   2 -15   2  183.23    8.53
  -2  15  -2  189.64    8.58
   1 -15   2  192.79    8.89
  -1  15  -2  183.49    8.43
   0 -15   2 1325.62   44.46
   0  15  -2 1232.04   41.31
  -1 -15   2  417.12   15.61
   1  15  -2  480.15   17.37
  -2 -15   2   81.17    6.00
   2  15  -2   59.15    5.38
  -3 -15   2  303.59   12.05
   3  15  -2  298.01   11.74
  -4 -15   2  844.80   28.90
   4  15  -2  773.45   26.63
  -5 -15   2   99.73    6.46
   5  15  -2   95.85    6.05
  -6 -15   2   65.97    5.79
   6  15  -2   66.33    5.53
  -7 -15   2    9.41    4.86
   7  15  -2   12.72    4.50
  -8 -15   2  520.63   18.35
   8  15  -2  505.53   17.73
  -9 -15   2   33.71    4.55
   9  15  -2   30.25    4.03
   8 -16   2  406.32   14.63
  -8  16  -2  400.32   14.37
   7 -16   2  597.15   20.68
  -7  16  -2  571.81   19.90
   6 -16   2  417.59   15.15
  -6  16  -2  413.56   14.99
   5 -16   2   69.28    5.53
  -5  16  -2   80.03    5.48
   4 -16   2    1.09    4.55
  -4  16  -2    7.03    3.98
   3 -16   2  166.32    7.81
  -3  16  -2  141.45    7.13
   2 -16   2  259.44   10.65
  -2  16  -2  271.84   10.86
   1 -16   2   35.26    5.17
  -1  16  -2   37.48    4.76
   0 -16   2   71.92    5.64
   0  16  -2   68.04    5.53
  -1 -16   2  415.94   15.41
   1  16  -2  432.01   15.77
  -2 -16   2  888.23   30.19
   2  16  -2  992.14   33.50
  -3 -16   2  237.31    9.87
   3  16  -2  236.17    9.77
  -4 -16   2    5.84    4.76
   4  16  -2    3.72    4.24
  -5 -16   2  499.54   17.79
   5  16  -2  479.94   17.06
  -6 -16   2  290.15   11.32
   6  16  -2  250.23    9.87
  -7 -16   2   85.98    5.74
   7  16  -2   88.67    5.48
  -8 -16   2   69.23    5.02
   8  16  -2   58.16    4.60
   7 -17   2  349.24   12.77
  -7  17  -2  340.45   12.46
   6 -17   2  172.01    7.65
  -6  17  -2  161.20    7.44
   5 -17   2   83.65    5.69
  -5  17  -2   99.94    6.00
   4 -17   2  141.61    7.13
  -4  17  -2  156.91    7.39
   3 -17   2  101.02    6.26
  -3  17  -2   97.61    5.95
   2 -17   2   40.17    5.12
  -2  17  -2   29.16    4.60
   1 -17   2  110.85    6.51
  -1  17  -2  119.79    6.57
   0 -17   2    6.05    4.60
   0  17  -2   -0.05    4.24
  -1 -17   2  140.47    6.98
   1  17  -2  133.18    6.72
  -2 -17   2  163.17    7.81
   2  17  -2  166.89    7.65
  -3 -17   2    4.45    4.76
   3  17  -2   -7.50    4.08
  -4 -17   2   46.07    5.17
   4  17  -2   52.48    4.96
  -5 -17   2   43.95    4.65
   5  17  -2   47.51    4.70
  -6 -17   2  119.33    6.41
   6  17  -2  121.55    6.20
   4 -18   2   25.02    4.65
  -4  18  -2   16.91    4.34
   3 -18   2   44.77    4.91
  -3  18  -2   39.45    4.60
   2 -18   2   -1.40    4.55
  -2  18  -2    3.72    4.45
   1 -18   2    5.58    4.50
  -1  18  -2   -4.34    4.14
   0 -18   2    8.43    4.55
   0  18  -2    3.93    4.08
  -1 -18   2    2.33    4.50
   1  18  -2    5.69    4.08
  -2 -18   2   70.42    5.38
   2  18  -2   76.47    5.27
  -3 -18   2   -2.43    4.24
   3  18  -2    0.88    3.88
   3  17   3  276.60   10.50
  -3 -17  -3  282.60   10.70
   2  17   3   67.88    4.91
  -2 -17  -3   61.06    5.12
   0  17   3  177.28    7.60
   0 -17  -3  128.58    6.26
  -1  17   3   52.32    4.45
   1 -17  -3   46.74    4.55
  -2  17   3   14.27    4.03
   2 -17  -3   11.27    4.24
  -3  17   3   26.94    4.29
   3 -17  -3   30.76    4.19
  -4  17   3   75.23    5.07
   4 -17  -3   75.48    5.38
  -5  17   3  378.30   13.65
   5 -17  -3  386.57   13.86
  -6  17   3  160.95    7.19
   6 -17  -3  142.85    6.77
   5  16   3  123.05    6.36
  -5 -16  -3  144.19    6.88
   4  16   3    5.58    3.93
  -4 -16  -3    6.82    4.34
   3  16   3   65.51    5.02
  -3 -16  -3   75.02    5.43
   2  16   3    9.56    4.03
  -2 -16  -3    0.72    4.45
   1  16   3   17.58    4.29
  -1 -16  -3   17.47    4.60
   0  16   3   27.45    4.29
   0 -16  -3   31.69    4.81
  -1  16   3   45.29    4.65
   1 -16  -3   53.51    4.91
  -2  16   3   82.52    5.12
   2 -16  -3   76.31    5.58
  -3  16   3  102.52    5.79
   3 -16  -3  111.73    6.26
  -4  16   3  209.65    8.74
   4 -16  -3  188.81    8.38
  -5  16   3  273.29   10.65
   5 -16  -3  299.14   11.63
  -6  16   3    6.82    4.14
   6 -16  -3    7.19    4.50
  -7  16   3   97.82    5.64
   7 -16  -3   86.03    5.74
  -8  16   3  325.61   12.10
   8 -16  -3  379.43   13.80
   7  15   3  188.50    8.07
  -7 -15  -3  190.21    8.27
   6  15   3   56.66    4.86
  -6 -15  -3   47.62    5.02
   5  15   3    6.26    4.03
  -5 -15  -3    3.83    4.65
   4  15   3   10.81    4.34
  -4 -15  -3    1.24    4.70
   3  15   3   37.79    4.70
  -3 -15  -3   39.65    5.17
   2  15   3   20.42    4.55
  -2 -15  -3   14.32    4.76
   1  15   3  204.48    8.63
  -1 -15  -3  246.25   10.13
   0  15   3   26.32    4.76
  -1  15   3  157.59    7.50
   1 -15  -3  155.52    7.65
  -2  15   3  182.04    8.01
   2 -15  -3  186.80    8.53
  -3  15   3   47.05    4.81
   3 -15  -3   54.23    5.33
  -4  15   3    4.08    4.19
   4 -15  -3    5.12    4.81
  -5  15   3  124.55    6.72
   5 -15  -3  116.07    6.46
  -6  15   3    4.34    4.45
   6 -15  -3    0.41    4.45
  -7  15   3   43.64    4.91
   7 -15  -3   42.96    4.81
  -8  15   3   -0.41    4.50
   8 -15  -3    2.64    4.81
  -9  15   3  311.65   11.58
   9 -15  -3  362.58   13.29
 -10  15   3    4.60    3.93
  10 -15  -3   11.63    4.29
   8  14   3  124.13    6.62
  -8 -14  -3  148.64    7.24
   7  14   3  430.67   15.56
  -7 -14  -3  503.52   17.89
   6  14   3 1263.06   42.08
  -6 -14  -3 1234.62   41.36
   5  14   3  639.54   22.18
  -5 -14  -3  778.62   26.83
   4  14   3  116.43    6.31
  -4 -14  -3  108.31    6.57
   3  14   3    1.19    4.14
  -3 -14  -3    8.22    4.39
   2  14   3   47.88    5.07
  -2 -14  -3   41.41    5.43
   1  14   3  398.31   14.63
  -1 -14  -3  360.67   13.80
   0  14   3   30.14    4.65
   0 -14  -3   30.76    5.07
  -1  14   3   38.00    4.91
   1 -14  -3   38.10    5.33
  -2  14   3 1517.95   50.41
   2 -14  -3 1735.09   57.54
  -3  14   3  985.42   33.19
   3 -14  -3  965.26   32.68
  -4  14   3   41.46    4.96
   4 -14  -3   25.64    5.02
  -5  14   3  130.55    6.88
   5 -14  -3  170.92    8.17
  -6  14   3  397.17   14.68
   6 -14  -3  375.56   14.22
  -7  14   3  134.99    7.19
   7 -14  -3  139.85    7.08
  -8  14   3  232.19    9.62
   8 -14  -3  251.16   10.29
  -9  14   3    5.89    4.45
   9 -14  -3   15.92    4.34
 -10  14   3  485.78   17.22
  10 -14  -3  529.42   18.56
 -11  14   3  710.37   24.20
  11 -14  -3  747.08   25.39
   9  13   3  117.46    6.57
  -9 -13  -3  115.29    6.77
   8  13   3   39.76    4.81
  -8 -13  -3   40.17    5.27
   7  13   3  254.94   10.24
  -7 -13  -3  265.07   10.86
   6  13   3   14.01    4.65
  -6 -13  -3    7.55    4.70
   5  13   3  456.11   16.54
  -5 -13  -3  470.79   17.16
   4  13   3 1504.50   50.05
  -4 -13  -3 1808.51   59.97
   3  13   3   66.90    5.58
  -3 -13  -3   58.58    5.74
   2  13   3  364.60   13.70
  -2 -13  -3  404.35   15.10
   1  13   3  687.63   23.89
  -1 -13  -3  599.73   21.09
   0  13   3  797.23   27.30
   0 -13  -3  731.05   25.28
  -1  13   3  476.53   17.11
   1 -13  -3  584.74   20.58
  -2  13   3  405.80   14.84
   2 -13  -3  388.17   14.42
  -3  13   3   81.58    5.48
   3 -13  -3   85.51    6.00
  -4  13   3   18.41    4.45
   4 -13  -3   32.47    4.70
  -5  13   3    9.72    4.45
   5 -13  -3   16.65    4.76
  -6  13   3 1124.50   37.74
   6 -13  -3 1038.16   35.05
  -7  13   3    6.20    4.34
   7 -13  -3    5.69    4.50
  -8  13   3  109.66    6.51
   8 -13  -3  101.18    6.26
  -9  13   3  297.90   11.43
   9 -13  -3  318.94   12.30
 -10  13   3  302.61   11.68
  10 -13  -3  316.93   12.25
 -11  13   3   31.49    4.60
  11 -13  -3   28.18    4.65
 -12  13   3    0.88    4.08
  12 -13  -3    2.43    4.24
  10  12   3  104.49    6.26
 -10 -12  -3  128.94    7.24
   9  12   3  151.54    7.39
  -9 -12  -3  154.79    7.86
   8  12   3  128.17    6.93
  -8 -12  -3  133.85    7.34
   7  12   3    9.56    4.65
  -7 -12  -3   18.20    4.86
   6  12   3  104.33    6.36
  -6 -12  -3  125.53    7.13
   5  12   3   78.12    6.05
  -5 -12  -3   70.93    6.00
   4  12   3  166.94    8.07
  -4 -12  -3  165.03    8.07
   3  12   3   -7.24    4.65
  -3 -12  -3    3.15    4.60
   2  12   3  199.98    8.74
  -2 -12  -3  222.83    9.56
   1  12   3  609.56   21.30
  -1 -12  -3  642.65   22.44
   0  12   3  584.74   20.53
   0 -12  -3  511.22   18.25
  -1  12   3    5.95    4.29
   1 -12  -3   11.01    4.65
  -2  12   3   -4.34    4.29
   2 -12  -3    2.17    4.60
  -3  12   3  389.93   14.32
   3 -12  -3  409.16   15.10
  -4  12   3   51.03    5.07
   4 -12  -3   53.25    5.33
  -5  12   3    9.98    4.45
   5 -12  -3    7.70    4.86
  -6  12   3  932.69   31.59
   6 -12  -3  955.44   32.47
  -7  12   3  496.33   17.68
   7 -12  -3  523.73   18.82
  -8  12   3  198.38    8.63
   8 -12  -3  212.54    9.46
  -9  12   3  482.68   17.32
   9 -12  -3  555.27   19.70
 -10  12   3   24.20    4.86
  10 -12  -3   24.20    4.76
 -11  12   3   80.91    5.74
  11 -12  -3   75.17    5.53
 -12  12   3  174.08    7.70
  12 -12  -3  182.25    8.12
 -13  12   3  139.85    6.62
  13 -12  -3  151.38    7.19
  11  11   3   41.10    5.02
 -11 -11  -3   55.06    5.64
  10  11   3  198.53    8.63
 -10 -11  -3  221.18    9.62
   9  11   3    9.20    4.81
  -9 -11  -3    5.12    5.48
   8  11   3   26.21    4.81
  -8 -11  -3   17.63    5.07
   7  11   3   18.41    4.81
  -7 -11  -3   21.82    4.96
   6  11   3   88.67    6.20
  -6 -11  -3  123.67    7.03
   5  11   3  693.83   24.20
  -5 -11  -3  644.71   22.70
   4  11   3  645.75   22.65
  -4 -11  -3  613.18   21.66
   3  11   3  329.70   12.62
  -3 -11  -3  343.30   13.18
   2  11   3  924.93   31.38
  -2 -11  -3  851.52   29.21
   1  11   3  245.12   10.03
  -1 -11  -3  292.63   11.68
   0  11   3   94.46    5.95
   0 -11  -3  104.23    6.57
  -1  11   3  650.92   22.54
   1 -11  -3  696.41   24.14
  -2  11   3   20.06    4.08
   2 -11  -3   27.09    5.02
  -3  11   3   16.96    4.03
   3 -11  -3   22.28    4.86
  -4  11   3   70.57    5.33
   4 -11  -3   65.04    5.53
  -5  11   3   -0.31    4.19
   5 -11  -3    1.91    4.29
  -6  11   3   16.65    4.34
   6 -11  -3   23.01    4.76
  -7  11   3  112.24    6.31
   7 -11  -3  130.13    7.08
  -8  11   3   30.56    4.70
   8 -11  -3   40.59    5.22
  -9  11   3  363.92   13.49
   9 -11  -3  378.92   14.27
 -10  11   3  299.09   11.79
  10 -11  -3  287.98   11.43
 -11  11   3   53.25    5.12
  11 -11  -3   60.18    5.43
 -12  11   3  218.59    9.20
  12 -11  -3  202.88    8.79
 -13  11   3  198.69    8.43
  13 -11  -3  207.06    8.63
 -14  11   3  144.40    6.72
  14 -11  -3  148.59    6.88
  12  10   3    4.91    4.70
  12  10   3    3.57    3.98
 -12 -10  -3    9.36    5.02
  11  10   3  313.88   12.15
 -11 -10  -3  331.97   12.93
  10  10   3  462.21   16.70
 -10 -10  -3  513.75   18.51
   9  10   3  240.26    9.93
  -9 -10  -3  275.26   11.17
   8  10   3  153.09    7.86
  -8 -10  -3  153.76    7.91
   7  10   3    2.22    4.70
  -7 -10  -3   -5.12    4.70
   6  10   3  175.78    8.38
  -6 -10  -3  180.59    8.63
   5  10   3    8.53    4.70
  -5 -10  -3   18.92    4.91
   4  10   3   -0.62    4.55
  -4 -10  -3    0.00    4.70
   3  10   3  284.20   11.27
  -3 -10  -3  293.77   11.58
   2  10   3 2255.72   74.29
  -2 -10  -3 2402.55   79.10
   1  10   3 1832.81   60.59
  -1 -10  -3 1793.51   59.46
   0  10   3 1345.26   44.77
   0 -10  -3 1566.03   52.06
  -1  10   3  217.66    9.10
   1 -10  -3  218.80    9.25
  -2  10   3  321.84   12.10
   2 -10  -3  332.54   12.67
   3 -10  -3   53.25    5.43
  -4  10   3 2253.65   74.09
   4 -10  -3 1653.92   54.85
  -5  10   3  240.46    9.82
   5 -10  -3  245.17    9.93
  -6  10   3 2745.33   90.01
   6 -10  -3 3235.97  106.04
  -7  10   3  156.40    7.55
   7 -10  -3  174.96    7.96
  -8  10   3  332.39   12.62
   8 -10  -3  359.58   13.49
  -9  10   3  975.60   33.04
   9 -10  -3 1013.34   34.33
 -10  10   3    9.31    4.24
  10 -10  -3    7.76    4.50
 -11  10   3   43.64    5.07
  11 -10  -3   36.86    5.12
 -12  10   3  102.94    6.15
  12 -10  -3  100.15    6.00
 -13  10   3  260.42   10.24
  13 -10  -3  263.88   10.39
 -14  10   3   27.87    4.39
  14 -10  -3   19.85    4.45
  14 -10  -3   21.66    4.96
 -15  10   3   27.19    4.50
  15 -10  -3   35.00    5.43
  15 -10  -3   30.50    4.60
  12   9   3  378.81   13.70
  12   9   3  360.15   13.60
 -12  -9  -3  374.37   14.17
  11   9   3   90.01    6.36
 -11  -9  -3   86.29    5.89
  10   9   3  481.91   17.32
 -10  -9  -3  593.53   20.94
   9   9   3  626.10   21.92
  -9  -9  -3  754.84   26.16
   8   9   3 1751.12   58.06
  -8  -9  -3 1707.17   56.82
   7   9   3  190.21    8.89
  -7  -9  -3  173.30    8.48
   6   9   3   35.31    5.07
  -6  -9  -3   44.05    5.43
   5   9   3 2569.03   84.48
  -5  -9  -3 2846.66   93.53
   4   9   3  682.97   23.68
  -4  -9  -3  558.89   19.90
   3   9   3  432.53   15.72
  -3  -9  -3  439.56   16.08
   2   9   3   -1.86    4.29
  -2  -9  -3    0.21    4.34
   1   9   3  645.75   22.23
  -1  -9  -3  581.12   20.37
   0   9   3 3747.30  122.48
   0  -9  -3 3535.32  115.71
  -1   9   3  811.19   27.51
   1  -9  -3  696.93   23.89
  -2   9   3 1665.29   55.01
   2  -9  -3 1731.47   57.23
  -3   9   3  793.10   26.88
   3  -9  -3  848.42   28.95
  -4   9   3  321.48   12.15
   4  -9  -3  320.55   11.99
  -5   9   3  791.54   27.04
   5  -9  -3  956.47   32.31
  -6   9   3  241.24    9.77
   6  -9  -3  247.86   10.19
  -7   9   3 1123.98   37.64
   7  -9  -3 1087.27   36.50
  -8   9   3  244.91    9.93
   8  -9  -3  265.54   10.55
  -9   9   3   38.88    4.86
   9  -9  -3   35.42    4.86
 -10   9   3  517.01   18.30
  10  -9  -3  573.37   20.22
 -11   9   3  219.47    9.31
  11  -9  -3  213.27    9.31
 -12   9   3   19.59    4.65
  12  -9  -3   17.06    4.45
 -13   9   3  785.34   26.88
  13  -9  -3  708.31   24.40
 -14   9   3  244.29    9.87
  14  -9  -3  241.96   10.19
  14  -9  -3  230.95    9.46
 -15   9   3   52.94    4.86
  15  -9  -3   45.24    5.79
  15  -9  -3   37.95    4.70
  13   8   3   32.36    4.45
  13   8   3   35.78    5.07
 -13  -8  -3   32.05    5.33
  12   8   3   -5.17    4.29
  12   8   3    6.62    4.86
 -12  -8  -3    3.72    4.50
  11   8   3   59.30    5.58
  11   8   3   53.46    5.22
 -11  -8  -3   56.72    5.74
  10   8   3  115.45    7.03
 -10  -8  -3  127.96    7.29
   9   8   3   10.50    5.33
  -9  -8  -3   19.70    5.27
   8   8   3  173.10    8.38
  -8  -8  -3  182.14    8.79
   7   8   3   87.94    6.15
  -7  -8  -3   82.26    6.10
   6   8   3  105.68    6.41
  -6  -8  -3   98.85    6.36
   5   8   3  336.83   12.93
  -5  -8  -3  338.02   12.93
   4   8   3  141.61    7.24
  -4  -8  -3  155.05    7.44
   3   8   3    8.79    4.24
  -3  -8  -3   -0.41    4.39
   2   8   3  197.86    8.38
  -2  -8  -3  235.91    9.72
   1   8   3   50.46    4.60
  -1  -8  -3   50.87    5.07
   0   8   3  333.42   12.20
   0  -8  -3  396.24   14.53
  -1   8   3  959.57   32.26
   1  -8  -3  965.78   32.42
  -2   8   3  844.80   28.59
   2  -8  -3  837.56   28.28
  -3   8   3  759.49   25.80
   3  -8  -3  844.28   28.59
  -5   8   3  861.34   29.06
   5  -8  -3  905.80   30.50
  -6   8   3  571.81   19.96
   6  -8  -3  583.19   20.37
  -7   8   3   18.35    4.08
   7  -8  -3   12.98    4.34
  -8   8   3 1358.19   45.24
   8  -8  -3 1343.20   44.82
  -9   8   3  426.74   15.51
   9  -8  -3  427.21   15.56
 -10   8   3   83.96    5.74
  10  -8  -3   99.06    6.15
 -11   8   3  123.51    6.62
  11  -8  -3  155.72    7.44
 -12   8   3  155.10    7.55
  12  -8  -3  157.74    7.91
 -13   8   3   48.03    5.02
  13  -8  -3   48.08    5.33
  13  -8  -3   42.29    5.02
 -14   8   3   -5.43    4.29
  14  -8  -3    8.01    4.81
  14  -8  -3   -4.24    4.55
 -15   8   3   19.28    4.50
  15  -8  -3   20.94    4.65
  15  -8  -3   18.61    5.33
 -16   8   3    9.36    3.93
  16  -8  -3   20.94    4.50
  16  -8  -3    9.46    4.86
  14   7   3   32.31    4.96
  14   7   3   18.46    4.29
 -14  -7  -3   22.80    5.17
  13   7   3   59.40    5.27
  13   7   3   67.00    5.53
 -13  -7  -3   61.42    5.53
  12   7   3    7.29    4.91
  12   7   3    4.08    4.29
 -12  -7  -3    4.55    5.27
  11   7   3   31.85    5.33
  11   7   3   36.45    4.81
 -11  -7  -3   37.59    5.74
  10   7   3  243.20   10.19
 -10  -7  -3  258.56   11.01
   9   7   3  217.25    9.56
  -9  -7  -3  245.99   10.65
   8   7   3 1807.47   59.87
  -8  -7  -3 1859.17   61.68
   7   7   3   -1.24    4.65
  -7  -7  -3    3.36    4.60
   6   7   3   24.71    4.81
  -6  -7  -3   19.18    4.70
   5   7   3    5.84    4.34
  -5  -7  -3    4.91    4.14
   4   7   3  804.99   27.40
  -4  -7  -3  879.44   29.88
   3   7   3   14.06    3.98
  -3  -7  -3   19.13    4.34
   2   7   3   69.64    4.91
  -2  -7  -3   75.12    5.74
   1   7   3 1259.96   41.93
  -1  -7  -3 1203.09   40.17
   0   7   3  705.72   24.14
   0  -7  -3  773.97   26.32
  -1   7   3   20.78    4.14
   1  -7  -3   10.60    4.24
  -2   7   3 2307.42   75.74
   2  -7  -3 1965.68   64.68
  -3   7   3  803.44   27.25
   3  -7  -3  907.87   30.50
  -4   7   3 1333.89   44.26
   4  -7  -3 1373.18   45.55
  -5   7   3  233.84    9.15
   5  -7  -3  227.07    9.31
  -6   7   3 1120.36   37.48
   6  -7  -3 1030.92   34.64
  -7   7   3  111.57    6.15
   7  -7  -3  119.84    6.31
  -8   7   3  625.58   21.71
   8  -7  -3  625.58   21.82
  -9   7   3  875.82   29.73
   9  -7  -3  953.89   32.26
 -10   7   3  219.57    9.00
  10  -7  -3  246.20   10.24
 -11   7   3   29.99    4.81
  11  -7  -3   32.11    5.17
 -12   7   3   44.10    5.07
  12  -7  -3   47.88    5.43
  12  -7  -3   62.20    5.43
 -13   7   3  160.58    7.91
  13  -7  -3  172.68    8.69
  13  -7  -3  183.18    8.48
 -14   7   3  377.16   14.01
  14  -7  -3  383.31   14.37
  14  -7  -3  338.02   13.18
 -15   7   3  104.49    6.00
  15  -7  -3  114.88    6.82
  15  -7  -3  106.81    6.31
 -16   7   3   30.14    4.24
  16  -7  -3   41.77    4.86
  16  -7  -3   35.98    5.38
  14   6   3  162.65    7.50
  14   6   3  160.79    8.07
 -14  -6  -3  168.08    7.96
  13   6   3   83.96    5.43
  13   6   3   79.31    6.05
 -13  -6  -3   79.62    6.26
  12   6   3   10.91    4.45
  12   6   3   -2.64    4.86
 -12  -6  -3    0.31    4.91
  11   6   3  518.05   18.51
  11   6   3  567.16   20.16
 -11  -6  -3  571.81   20.47
  10   6   3 1150.87   38.83
  10   6   3 1181.89   39.76
 -10  -6  -3 1135.87   38.47
   9   6   3  256.70   10.65
  -9  -6  -3  271.64   11.37
   8   6   3  166.58    8.01
  -8  -6  -3  182.82    8.43
   7   6   3  898.57   30.66
  -7  -6  -3  900.12   30.66
   6   6   3 1394.38   46.53
  -6  -6  -3 1340.61   44.77
   5   6   3  435.84   15.61
  -5  -6  -3  471.05   16.85
   4   6   3  783.79   26.73
  -4  -6  -3  823.08   28.02
   3   6   3  184.11    7.91
  -3  -6  -3  158.57    7.34
   2   6   3 1320.45   43.79
  -2  -6  -3 1284.26   42.71
   1   6   3 2590.74   84.94
  -1  -6  -3 2228.84   73.21
   0   6   3   21.40    3.93
   0  -6  -3   19.90    4.24
  -1   6   3  146.16    6.88
   1  -6  -3  150.40    7.03
   2  -6  -3 4602.95  150.09
  -3   6   3  750.70   25.44
   3  -6  -3  819.46   27.66
  -4   6   3 5263.18  171.60
   4  -6  -3 4492.83  146.57
  -6   6   3   -0.31    3.88
   6  -6  -3    4.86    3.93
  -7   6   3  357.46   13.13
   7  -6  -3  442.87   15.82
  -8   6   3   90.74    5.79
   8  -6  -3   92.55    5.69
  -9   6   3    7.65    4.29
   9  -6  -3    9.36    4.60
 -10   6   3   39.65    4.76
  10  -6  -3   38.41    4.81
 -11   6   3  599.73   20.94
  11  -6  -3  635.92   22.23
 -12   6   3  934.76   31.80
  12  -6  -3  881.50   30.35
  12  -6  -3  965.26   32.78
 -13   6   3  714.51   24.71
  13  -6  -3  794.13   27.45
  13  -6  -3  701.07   24.56
 -14   6   3  239.38    9.87
  14  -6  -3  248.06   10.24
  14  -6  -3  231.98    9.87
 -15   6   3   25.75    4.55
  15  -6  -3   20.73    5.12
  15  -6  -3   29.88    4.96
 -16   6   3   43.07    4.70
  16  -6  -3   42.39    5.07
  16  -6  -3   53.98    5.89
  14   5   3  242.12    9.72
  14   5   3  239.17    9.98
 -14  -5  -3  259.69   10.75
  13   5   3  636.44   21.97
  13   5   3  604.39   21.30
 -13  -5  -3  623.00   21.97
  12   5   3  407.35   14.94
  12   5   3  404.87   14.99
 -12  -5  -3  410.30   15.30
  11   5   3  544.41   19.23
  11   5   3  583.71   20.63
 -11  -5  -3  520.11   18.87
  10   5   3  451.14   16.54
  10   5   3  423.95   15.56
 -10  -5  -3  462.16   17.01
   9   5   3   37.33    5.33
   9   5   3   39.60    4.86
  -9  -5  -3   37.43    5.53
   8   5   3    5.74    5.02
  -8  -5  -3   15.56    4.96
   7   5   3 1622.90   53.87
  -7  -5  -3 1614.63   53.67
   6   5   3   46.94    4.86
  -6  -5  -3   52.99    5.43
   5   5   3 5206.30  169.68
  -5  -5  -3 5154.60  168.18
   4   5   3 2382.39   78.17
  -4  -5  -3 2313.63   76.05
   3   5   3   20.42    4.19
  -3  -5  -3   15.05    4.29
   2   5   3 2530.77   82.93
  -2  -5  -3 2254.17   74.04
   1   5   3  334.09   12.30
  -1  -5  -3  334.71   12.25
   0   5   3 1659.61   54.70
   0  -5  -3 1714.41   56.51
  -1   5   3  134.16    6.41
   1  -5  -3  130.34    6.20
  -2   5   3  263.62   10.13
   2  -5  -3  267.61   10.34
  -3   5   3  975.60   32.73
   3  -5  -3 1008.17   33.71
  -4   5   3  694.35   23.68
   4  -5  -3  650.40   22.18
  -5   5   3 1155.00   38.47
   5  -5  -3 1200.50   39.91
  -6   5   3 2565.41   84.07
   6  -5  -3 2769.63   90.74
  -7   5   3   38.98    4.24
   7  -5  -3   39.76    4.76
  -8   5   3   13.80    4.14
   8  -5  -3   14.11    4.34
  -9   5   3  466.24   16.75
   9  -5  -3  531.49   18.77
 -10   5   3  460.55   16.44
  10  -5  -3  483.51   17.37
 -11   5   3  230.64    9.41
  11  -5  -3  234.21   10.03
  11  -5  -3  219.73    9.36
 -12   5   3  152.78    7.50
  12  -5  -3  144.92    7.76
  12  -5  -3  164.67    8.01
 -13   5   3   70.88    5.64
  13  -5  -3   97.66    6.36
  13  -5  -3   84.84    6.77
 -14   5   3  134.73    7.13
  14  -5  -3  125.27    7.29
  14  -5  -3  135.46    7.24
 -15   5   3  525.80   18.56
  15  -5  -3  600.25   21.04
  15  -5  -3  562.51   19.85
 -16   5   3  119.69    6.00
  16  -5  -3  108.21    6.51
  16  -5  -3  123.46    6.51
  17  -5  -3  566.13   19.59
  17  -5  -3  535.62   18.92
  15   4   3    3.88    3.67
  15   4   3    4.29    4.81
  14   4   3    2.17    3.93
  14   4   3   -0.31    4.86
  13   4   3    7.34    4.39
  13   4   3   14.42    5.22
 -13  -4  -3    9.51    5.07
  12   4   3  105.11    6.57
  12   4   3  112.19    6.46
 -12  -4  -3  112.40    7.13
  11   4   3  262.75   10.91
  11   4   3  245.37   10.24
 -11  -4  -3  253.28   10.75
  10   4   3   23.73    4.76
  10   4   3   30.66    5.12
 -10  -4  -3   19.39    5.12
   9   4   3  744.50   25.70
   9   4   3  695.90   24.14
  -9  -4  -3  739.84   25.75
   8   4   3 1091.41   36.76
   8   4   3 1106.92   37.22
  -8  -4  -3 1162.76   39.14
   7   4   3    8.17    4.50
  -7  -4  -3   10.75    4.60
   6   4   3  352.55   13.03
  -6  -4  -3  363.56   13.44
   5   4   3   10.13    3.93
  -5  -4  -3   13.34    4.24
   4   4   3  352.55   12.87
  -4  -4  -3  376.95   13.70
   3   4   3   37.54    4.08
  -3  -4  -3   39.50    4.29
   2   4   3  807.57   27.14
  -2  -4  -3  812.74   27.40
   1   4   3 1411.44   46.58
  -1  -4  -3 1274.95   42.19
   0   4   3   24.35    3.88
   0  -4  -3   17.37    4.08
  -1   4   3  345.67   12.62
   1  -4  -3  343.30   12.56
  -2   4   3    0.88    3.62
   2  -4  -3    1.65    4.03
  -3   4   3   10.50    4.03
   3  -4  -3   18.61    4.03
   4  -4  -3 4623.12  150.76
  -5   4   3   28.38    4.24
   5  -4  -3   34.59    4.50
  -7   4   3   34.33    4.03
   7  -4  -3   35.62    4.55
  -8   4   3   55.17    4.45
   8  -4  -3   65.20    4.96
  -9   4   3  695.90   23.89
   9  -4  -3  630.24   21.87
 -10   4   3   49.68    4.76
  10  -4  -3   62.61    5.53
  10  -4  -3   57.13    5.58
 -11   4   3    6.62    4.08
  11  -4  -3    9.10    4.81
  11  -4  -3   10.91    4.60
 -12   4   3   17.16    4.50
  12  -4  -3   23.16    5.53
  12  -4  -3   18.04    4.86
 -13   4   3   36.40    5.02
  13  -4  -3   41.62    5.33
  13  -4  -3   49.37    6.00
 -14   4   3    1.71    4.29
  14  -4  -3    9.46    5.12
  14  -4  -3   -2.33    4.45
 -15   4   3   49.63    4.91
  15  -4  -3   49.48    5.64
  15  -4  -3   62.56    5.53
  16  -4  -3   58.53    5.43
  16  -4  -3   58.89    5.22
  17  -4  -3   59.51    5.84
  17  -4  -3   57.65    5.02
  15   3   3   61.99    4.96
  15   3   3   59.09    5.79
  14   3   3  127.50    6.51
  14   3   3  120.31    7.08
  13   3   3  225.42    9.36
  13   3   3  228.42    9.93
  12   3   3 1342.68   44.82
  12   3   3 1406.79   46.94
 -12  -3  -3 1581.02   52.84
  11   3   3  900.12   30.66
  11   3   3  853.59   29.16
 -11  -3  -3  830.32   28.69
  10   3   3   -4.76    4.91
  10   3   3    3.98    4.60
 -10  -3  -3   -5.74    5.02
   9   3   3  629.72   22.13
   9   3   3  692.28   24.04
  -9  -3  -3  684.01   23.83
   8   3   3   55.68    4.91
   8   3   3   55.01    5.33
  -8  -3  -3   56.15    5.33
   7   3   3    1.45    3.88
   7   3   3   -1.50    4.34
  -7  -3  -3    2.84    4.24
   6   3   3   31.23    4.29
  -6  -3  -3   41.72    4.70
   5   3   3 1682.87   55.48
  -5  -3  -3 1686.49   55.79
   4   3   3  950.78   31.85
  -4  -3  -3  935.79   31.38
   3   3   3   60.70    4.29
  -3  -3  -3   55.37    4.39
   2   3   3 1988.94   65.20
  -2  -3  -3 2150.25   70.52
   1   3   3  423.64   14.84
  -1  -3  -3  444.11   15.46
   0   3   3  235.71    9.20
   0  -3  -3  256.85    9.82
  -1   3   3  485.37   16.96
   1  -3  -3  512.25   17.84
  -2   3   3    8.38    4.14
   2  -3  -3    7.76    3.72
  -3   3   3  600.77   20.73
   3  -3  -3  578.54   20.01
  -4   3   3 1264.09   41.93
   4  -3  -3 1326.13   43.95
  -5   3   3 2635.72   86.29
   5  -3  -3 2779.45   90.94
  -6   3   3 1728.89   56.97
   6  -3  -3 1798.68   59.20
  -7   3   3   14.11    4.08
   7  -3  -3    8.07    4.08
  -8   3   3   35.00    4.45
   8  -3  -3   34.48    4.50
  -9   3   3  389.26   14.22
   9  -3  -3  383.16   14.06
   9  -3  -3  420.07   15.10
 -10   3   3  240.77    9.87
  10  -3  -3  262.85   10.60
  10  -3  -3  254.06   10.55
 -11   3   3  615.24   21.35
  11  -3  -3  700.03   24.30
  11  -3  -3  705.20   24.45
 -12   3   3   57.03    5.07
  12  -3  -3   59.51    5.43
  12  -3  -3   62.14    6.00
 -13   3   3   79.05    5.79
  13  -3  -3   93.58    6.93
  13  -3  -3   89.80    6.05
 -14   3   3   17.84    3.72
  14  -3  -3    6.93    5.27
  14  -3  -3   10.13    4.91
  15  -3  -3   20.94    5.22
  15  -3  -3   13.13    4.86
  16  -3  -3    7.70    4.86
  16  -3  -3   -0.21    4.45
  17  -3  -3    0.88    5.27
  17  -3  -3   12.98    4.34
  15   2   3  692.80   23.63
  15   2   3  657.64   22.90
  14   2   3   44.82    4.96
  14   2   3   41.10    5.22
  13   2   3   90.99    5.84
  13   2   3   88.98    6.15
  12   2   3  107.49    6.62
  12   2   3  116.69    6.72
  11   2   3 1272.88   42.71
  11   2   3 1274.43   42.71
  10   2   3   30.35    4.91
  10   2   3   28.33    5.12
 -10  -2  -3   23.11    5.12
   9   2   3 1412.99   47.10
   9   2   3 1366.46   45.65
  -9  -2  -3 1432.12   47.82
   8   2   3  239.74    9.87
   8   2   3  233.12    9.46
  -8  -2  -3  223.30    9.46
   7   2   3 1149.32   38.47
   7   2   3 1136.91   38.10
  -7  -2  -3 1180.85   39.55
   6   2   3 6721.15  218.75
  -5  -2  -3 4889.38  159.39
   4   2   3  332.02   12.10
  -4  -2  -3  363.41   13.13
   3   2   3   40.33    3.83
  -3  -2  -3   37.79    3.98
   2   2   3  179.92    7.13
  -2  -2  -3  191.45    7.60
   0   2   3 1369.56   45.19
   0  -2  -3 1388.18   45.76
  -1   2   3  275.83   10.29
   1  -2  -3  273.60   10.19
  -2   2   3  662.29   22.54
   2  -2  -3  705.20   23.94
  -3   2   3   18.20    4.29
   3  -2  -3   16.23    4.50
  -4   2   3 1621.35   53.56
   4  -2  -3 1669.95   55.17
  -5   2   3  201.84    8.22
   5  -2  -3  201.58    8.32
  -6   2   3 1787.31   58.84
   6  -2  -3 1814.19   59.66
  -7   2   3 1156.55   38.72
   7  -2  -3 1020.06   34.43
  -8   2   3 2318.28   76.10
   8  -2  -3 2559.21   84.01
   8  -2  -3 2453.74   80.55
  -9   2   3 1157.07   38.62
   9  -2  -3 1116.23   37.28
   9  -2  -3 1180.34   39.34
 -10   2   3  124.44    6.62
  10  -2  -3  139.90    6.93
  10  -2  -3  120.52    6.98
 -11   2   3  326.18   12.41
  11  -2  -3  316.15   12.46
  11  -2  -3  317.19   12.15
 -12   2   3  116.95    6.46
  12  -2  -3  128.17    6.77
  12  -2  -3  119.17    7.29
  13  -2  -3  115.91    6.82
  13  -2  -3  118.40    7.24
  14  -2  -3  157.43    7.96
  14  -2  -3  162.24    8.22
  15  -2  -3  126.36    7.29
  15  -2  -3  126.56    7.13
  16  -2  -3  889.78   30.19
  16  -2  -3  844.80   28.69
  17  -2  -3  756.39   25.70
  17  -2  -3  717.61   24.76
  15   1   3   25.39    5.33
  15   1   3   26.88    4.55
  14   1   3   59.40    5.12
  14   1   3   65.61    5.84
  13   1   3    6.88    4.45
  13   1   3   10.86    5.22
  12   1   3  164.10    7.76
  12   1   3  181.11    8.53
  11   1   3   85.20    6.00
  11   1   3   73.67    5.95
  10   1   3  346.81   13.24
  10   1   3  359.79   13.75
   9   1   3 1620.31   53.82
   9   1   3 1575.33   52.42
   8   1   3 2169.38   71.40
   8   1   3 2091.83   68.97
  -8  -1  -3 2147.67   70.83
   7   1   3 3025.03   99.16
   7   1   3 2867.86   94.04
  -7  -1  -3 2956.27   96.94
   6   1   3 1417.13   46.89
   6   1   3 1515.36   50.15
  -6  -1  -3 1387.66   46.12
   5   1   3   16.44    3.62
   5   1   3   25.28    3.83
  -5  -1  -3   26.68    3.98
   4   1   3  263.47    9.87
   4   1   3  244.86    9.41
  -4  -1  -3  272.21   10.19
   3   1   3    8.12    3.10
  -3  -1  -3    8.69    3.21
   2   1   3  670.56   22.49
  -2  -1  -3  740.88   24.76
   1   1   3   89.18    4.34
  -1  -1  -3  100.66    4.60
   0   1   3  237.31    8.58
   0  -1  -3  229.09    8.38
  -2   1   3 1221.18   40.28
   2  -1  -3 1250.65   41.31
  -3   1   3  107.12    5.89
   3  -1  -3  103.51    5.84
  -4   1   3   27.92    4.08
   4  -1  -3   31.07    4.70
  -5   1   3 1367.49   45.24
   5  -1  -3 1229.45   40.90
  -6   1   3   20.58    4.24
   6  -1  -3   19.65    3.72
   6  -1  -3   15.41    4.50
  -7   1   3  100.56    5.74
   7  -1  -3  103.87    6.05
   7  -1  -3  115.86    5.74
  -8   1   3  632.82   21.66
   8  -1  -3  572.85   19.96
   8  -1  -3  587.32   20.27
  -9   1   3 1408.86   46.74
   9  -1  -3 1454.35   48.24
   9  -1  -3 1484.86   49.17
 -10   1   3  568.71   19.90
  10  -1  -3  565.61   19.80
  10  -1  -3  569.23   20.01
 -11   1   3  175.53    7.50
  11  -1  -3  189.64    8.43
  11  -1  -3  204.37    9.15
  12  -1  -3  123.00    6.77
  12  -1  -3  127.60    7.29
  13  -1  -3  146.21    7.86
  13  -1  -3  158.31    7.60
  15  -1  -3  366.25   13.91
  15  -1  -3  376.85   14.22
  16  -1  -3   82.15    5.74
  16  -1  -3   92.86    6.05
  17  -1  -3   16.60    5.07
  17  -1  -3   16.34    4.29
  15   0   3  -11.58    5.33
  15   0   3    4.55    4.24
  14   0   3   -3.10    4.34
  14   0   3   -8.69    4.96
  13   0   3    7.50    4.91
  13   0   3   -4.24    4.39
  12   0   3    5.84    4.81
  12   0   3    4.45    4.55
  11   0   3    2.43    4.34
  11   0   3   -5.69    4.81
  10   0   3    7.29    4.70
  10   0   3    8.48    4.76
   9   0   3    1.19    3.88
   9   0   3    3.83    4.60
   8   0   3   -1.14    3.83
   8   0   3    4.91    4.29
   7   0   3   -0.26    3.77
   7   0   3    5.69    4.03
   6   0   3    1.03    3.46
   6   0   3   -1.71    3.41
  -6   0  -3    2.17    3.83
   5   0   3    0.88    3.52
   5   0   3   -1.40    3.21
  -5   0  -3   -2.69    3.57
   4   0   3   -1.60    3.00
   4   0   3   -1.86    3.26
  -4   0  -3    2.69    3.46
   3   0   3    2.79    3.10
   3   0   3   -4.19    2.90
  -3   0  -3    2.02    3.05
   2   0   3    2.74    2.74
   2   0   3    4.03    2.69
  -2   0  -3   -2.27    2.90
   1   0   3    0.52    2.27
  -1   0  -3    0.88    2.33
   0   0   3   -0.83    1.60
   0   0  -3    0.16    1.60
  -1   0   3   -2.27    1.86
   1   0  -3    0.00    1.86
  -2   0   3   -0.26    2.69
   2   0  -3   -1.45    3.15
  -3   0   3    0.57    3.77
   3   0  -3    1.86    3.83
   3   0  -3   -2.53    3.83
  -4   0   3    8.58    3.72
   4   0  -3    6.67    4.45
   4   0  -3   10.50    4.03
  -5   0   3    4.19    4.14
   5   0  -3    8.22    4.50
   5   0  -3    1.96    3.77
  -6   0   3    1.96    3.52
   6   0  -3    6.77    4.29
   6   0  -3    5.17    3.83
  -7   0   3    2.48    4.14
   7   0  -3   -2.69    4.34
   7   0  -3   -2.59    3.77
  -8   0   3   -7.91    3.93
   8   0  -3   -0.67    4.24
   8   0  -3    4.50    4.03
   9   0  -3   -5.74    3.77
   9   0  -3    1.91    4.08
  10   0  -3    3.26    4.45
  10   0  -3    3.88    4.39
  11   0  -3    0.31    4.81
  11   0  -3    2.79    4.08
  12   0  -3    1.09    4.34
  12   0  -3   10.29    5.07
  13   0  -3    5.02    5.33
  13   0  -3   -3.52    4.45
  14   0  -3    1.65    5.33
  14   0  -3   -0.78    4.55
  15   0  -3   -0.41    5.12
  15   0  -3   -0.16    4.50
  16   0  -3   11.17    4.70
  16   0  -3   -1.03    4.91
  17   0  -3    3.98    4.96
  17   0  -3   -3.46    4.14
  15  -1   3   27.92    4.50
  15  -1   3   16.39    5.22
  14  -1   3   65.09    5.27
  14  -1   3   69.43    5.84
  13  -1   3    7.81    4.91
  13  -1   3   14.89    4.55
  12  -1   3  168.29    8.07
  12  -1   3  178.78    8.32
  11  -1   3   86.44    6.10
  11  -1   3   89.08    6.15
  10  -1   3  329.03   12.77
  10  -1   3  321.53   12.51
   9  -1   3 1617.21   53.72
   9  -1   3 1658.57   55.06
   8  -1   3 2033.41   67.00
   8  -1   3 2129.05   70.21
   7  -1   3 2870.96   94.10
   7  -1   3 2826.50   92.65
   6  -1   3 1445.05   47.82
   6  -1   3 1462.63   48.34
   5  -1   3   23.47    3.72
   5  -1   3   23.47    3.57
   4  -1   3  254.01    9.46
   4  -1   3  273.14    9.98
   3  -1   3    9.56    2.79
   3  -1   3    4.03    3.10
   2  -1   3  690.73   23.01
   2  -1   3  696.93   23.21
   1  -1   3   90.27    3.83
   1  -1   3   90.37    3.88
  -2  -1   3 1257.37   41.36
   2   1  -3 1197.92   39.45
  -3  -1   3   98.85    5.48
   3   1  -3  109.86    5.79
   3   1  -3  119.07    5.84
  -4  -1   3   30.71    4.70
   4   1  -3   25.70    4.65
   4   1  -3   21.09    4.29
  -5  -1   3 1335.44   44.36
   5   1  -3 1355.09   44.93
   5   1  -3 1293.05   42.91
  -6  -1   3   20.32    4.55
   6   1  -3   17.42    4.29
   6   1  -3   22.49    4.14
  -7  -1   3  125.74    6.51
   7   1  -3  119.79    6.10
   7   1  -3  130.75    6.62
  -8  -1   3  553.72   19.54
   8   1  -3  504.76   17.63
   8   1  -3  535.11   18.82
   9   1  -3 1573.27   52.22
   9   1  -3 1744.91   57.96
  10   1  -3  587.84   20.58
  10   1  -3  570.26   19.90
  11   1  -3  178.89    8.12
  11   1  -3  192.07    8.79
  12   1  -3  121.76    6.67
  12   1  -3  120.05    6.62
  13   1  -3  138.56    7.81
  13   1  -3  133.13    7.19
  14   1  -3  293.97   11.89
  14   1  -3  307.93   12.05
  15   1  -3  355.08   13.44
  15   1  -3  387.40   14.32
  16   1  -3   93.94    6.00
  16   1  -3   76.98    5.43
  17   1  -3   14.17    4.08
  17   1  -3   16.39    4.96
  15  -2   3  678.84   23.52
  15  -2   3  697.97   23.83
  14  -2   3   64.73    5.89
  14  -2   3   49.53    5.27
  13  -2   3   87.22    6.36
  13  -2   3   93.22    6.05
  12  -2   3   93.73    6.41
  12  -2   3  106.87    6.26
  11  -2   3 1288.91   43.12
  11  -2   3 1348.88   45.08
  10  -2   3   26.47    4.76
  10  -2   3   25.70    4.86
   9  -2   3 1423.85   47.46
   9  -2   3 1356.64   45.29
   8  -2   3  252.35   10.08
   8  -2   3  242.63    9.82
   7  -2   3 1181.89   39.45
   7  -2   3 1199.98   40.02
   5  -2   3 5480.32  178.37
   4  -2   3  335.18   12.05
   4  -2   3  324.84   11.58
  -4   2  -3  317.24   11.37
   3  -2   3   43.43    3.41
   3  -2   3   31.69    3.41
  -3   2  -3   42.14    3.41
   2  -2   3  188.61    7.03
   2  -2   3  193.05    7.24
  -2   2  -3  178.52    6.67
  -1  -2   3  266.83    9.36
   1   2  -3  246.36    8.58
  -2  -2   3  718.13   23.99
   2   2  -3  636.96   21.40
  -3  -2   3   10.55    3.88
   3   2  -3   13.29    3.93
  -4  -2   3 1730.95   57.03
   4   2  -3 1587.22   52.42
  -5  -2   3  214.04    8.79
   5   2  -3  187.52    7.96
   5   2  -3  208.61    8.53
  -6  -2   3 1898.98   62.61
   6   2  -3 1688.56   55.73
   6   2  -3 1729.40   57.03
  -7  -2   3  937.34   31.64
   7   2  -3 1117.78   37.28
   7   2  -3 1087.27   36.40
  -8  -2   3 2715.86   89.08
   8   2  -3 2507.51   82.26
   8   2  -3 2459.42   80.65
  -9  -2   3 1182.40   39.65
   9   2  -3 1231.52   41.10
   9   2  -3 1135.87   38.10
 -10  -2   3  117.98    6.67
  10   2  -3  131.37    6.67
  10   2  -3  110.07    6.46
 -11  -2   3  282.55   11.37
  11   2  -3  307.88   12.15
  11   2  -3  332.90   12.46
  12   2  -3  119.12    6.57
  12   2  -3  124.08    7.13
  13   2  -3  120.72    6.77
  13   2  -3  105.73    6.62
  14   2  -3  154.12    8.01
  14   2  -3  153.19    7.81
  15   2  -3  119.64    6.67
  15   2  -3  138.87    7.39
  16   2  -3  831.87   28.33
  16   2  -3  858.24   29.11
  17   2  -3  677.28   23.01
  17   2  -3  738.29   25.23
  15  -3   3   77.76    6.10
  15  -3   3   64.32    5.02
  14  -3   3  126.25    6.67
  14  -3   3  140.52    7.55
  13  -3   3  231.62    9.77
  13  -3   3  217.51    9.56
  12  -3   3 1276.50   42.71
  12  -3   3 1391.28   46.27
  11  -3   3  906.32   30.81
  11  -3   3  834.97   28.49
  10  -3   3    0.36    4.60
  10  -3   3   -5.12    5.12
   9  -3   3  676.77   23.42
   9  -3   3  664.88   23.21
   8  -3   3   47.93    4.86
   8  -3   3   47.82    5.27
   7  -3   3    1.50    3.83
   7  -3   3    5.07    3.98
  -7   3  -3    6.77    3.52
   6  -3   3   34.64    3.93
   6  -3   3   34.28    4.03
  -6   3  -3   38.72    3.83
   5  -3   3 1700.97   55.99
   5  -3   3 1726.82   56.82
  -5   3  -3 1745.43   57.44
   4  -3   3  937.86   31.33
   4  -3   3  984.91   32.78
  -4   3  -3  961.12   31.95
   3  -3   3   70.68    4.03
  -3   3  -3   59.77    3.67
   2  -3   3 2274.33   74.40
  -2   3  -3 2098.03   68.61
   1  -3   3  414.07   14.11
  -1   3  -3  432.17   14.63
   0  -3   3  247.80    8.89
   0   3  -3  261.81    9.31
  -1  -3   3  474.67   16.13
   1   3  -3  446.08   15.25
  -2  -3   3   10.34    3.36
   2   3  -3   12.25    3.52
  -3  -3   3  465.67   16.29
   3   3  -3  542.34   18.61
  -4  -3   3 1394.38   46.17
   4   3  -3 1264.61   41.88
  -5  -3   3 3305.77  108.11
   5   3  -3 3519.30  114.93
  -6  -3   3 2209.71   72.69
   6   3  -3 1883.99   62.04
  -7  -3   3   16.29    4.60
   7   3  -3   10.91    4.29
   7   3  -3    8.48    3.98
  -8  -3   3   46.38    4.70
   8   3  -3   40.64    4.29
   8   3  -3   30.35    3.98
  -9  -3   3  389.46   14.22
   9   3  -3  427.15   15.36
   9   3  -3  412.78   14.84
 -11  -3   3  740.36   25.64
  11   3  -3  691.76   23.99
  11   3  -3  682.46   23.63
 -12  -3   3   60.65    5.33
  12   3  -3   45.65    4.60
  12   3  -3   56.25    5.74
 -13  -3   3   97.51    6.67
  13   3  -3   91.72    6.46
  13   3  -3   93.42    6.15
  14   3  -3   18.97    5.17
  14   3  -3   13.29    4.55
  15   3  -3    5.89    5.12
  15   3  -3   18.35    4.65
  16   3  -3    3.83    4.60
  16   3  -3    3.46    4.34
  17   3  -3    9.51    3.77
  17   3  -3    4.34    4.76
  15  -4   3    0.16    4.14
  15  -4   3    2.69    5.12
  14  -4   3   -4.34    4.96
  14  -4   3    7.86    4.34
  13  -4   3   10.70    4.50
  13  -4   3   14.53    5.12
  12  -4   3   94.61    5.95
  12  -4   3  108.57    6.62
  11  -4   3  251.37   10.44
  11  -4   3  248.63   10.29
  10  -4   3   22.59    4.70
  10  -4   3   24.71    4.91
   9  -4   3  722.78   24.92
   9  -4   3  740.36   25.54
  -9   4  -3  714.51   24.45
   8  -4   3 1107.44   37.12
   8  -4   3 1098.65   36.97
  -8   4  -3 1109.51   37.12
   7  -4   3   10.91    3.98
   7  -4   3    8.17    4.19
  -7   4  -3    6.41    3.46
   6  -4   3  363.46   13.24
   6  -4   3  330.94   12.20
  -6   4  -3  354.46   12.82
   5  -4   3    8.58    3.05
   5  -4   3   16.49    3.41
  -5   4  -3   12.20    3.36
   4  -4   3  385.59   13.65
  -4   4  -3  341.95   12.15
   3  -4   3   36.35    3.52
  -3   4  -3   41.52    3.62
   2  -4   3  840.66   27.97
  -2   4  -3  842.73   28.02
   1  -4   3 1402.13   46.12
  -1   4  -3 1416.09   46.53
   0  -4   3   21.77    3.21
   0   4  -3   24.14    2.95
  -1  -4   3  315.53   11.27
   1   4  -3  342.36   12.10
  -2  -4   3    0.36    3.52
   2   4  -3   -2.48    3.15
  -3  -4   3   11.32    3.72
   3   4  -3   13.13    3.72
  -5  -4   3   24.71    4.08
   5   4  -3   25.28    4.29
  -6  -4   3 1553.62   51.44
   6   4  -3 1435.22   47.62
  -7  -4   3   24.25    4.81
   7   4  -3   26.57    4.14
  -8  -4   3   69.28    5.53
  -9  -4   3  704.69   24.30
   9   4  -3  674.18   23.16
   9   4  -3  667.46   23.01
 -10  -4   3   58.16    5.69
  10   4  -3   48.39    5.38
  10   4  -3   53.30    5.22
 -11  -4   3   16.65    5.07
  11   4  -3    8.43    4.86
  11   4  -3    4.60    4.50
 -12  -4   3   26.32    5.33
  12   4  -3   20.06    4.65
  12   4  -3   15.20    4.76
 -13  -4   3   38.47    5.22
  13   4  -3   39.45    4.76
  13   4  -3   37.90    5.58
 -14  -4   3    2.90    5.22
  14   4  -3    3.15    4.91
  14   4  -3    2.22    4.60
  15   4  -3   54.44    5.64
  15   4  -3   55.48    4.91
  16   4  -3   50.77    5.27
  16   4  -3   47.41    4.81
  17   4  -3   50.72    5.22
  17   4  -3   53.92    4.29
  15  -5   3    8.07    4.50
  15  -5   3   20.84    5.17
  14  -5   3  246.46   10.29
  14  -5   3  252.97   10.13
  13  -5   3  587.84   20.53
  13  -5   3  613.18   21.56
  12  -5   3  398.20   14.68
  12  -5   3  420.95   15.51
  11  -5   3  554.24   19.59
  11  -5   3  569.75   20.16
  10  -5   3  417.64   15.46
  10  -5   3  412.68   15.30
 -10   5  -3  411.49   14.89
   9  -5   3   32.83    4.96
   9  -5   3   35.52    5.02
  -9   5  -3   33.40    4.24
   8  -5   3    4.86    4.39
   8  -5   3   12.10    4.70
  -8   5  -3    5.07    3.83
   7  -5   3 1650.30   54.65
   7  -5   3 1617.21   53.56
  -7   5  -3 1555.17   51.49
   6  -5   3   52.27    4.60
  -6   5  -3   44.67    4.03
   4  -5   3 2336.89   76.62
  -4   5  -3 2379.29   77.97
   3  -5   3   15.15    3.21
  -3   5  -3   18.72    3.41
   2  -5   3 2573.17   84.17
  -2   5  -3 2459.94   80.45
   1  -5   3  344.64   12.25
  -1   5  -3  348.16   12.25
   0  -5   3 1822.98   59.82
   0   5  -3 1750.08   57.49
  -1  -5   3  133.60    6.05
   1   5  -3  121.86    5.58
  -2  -5   3  271.79   10.24
   2   5  -3  269.52   10.08
  -3  -5   3 1030.40   34.43
   3   5  -3 1006.10   33.50
  -4  -5   3  712.96   24.30
   4   5  -3  649.37   22.13
  -5  -5   3 1246.51   41.46
   5   5  -3 1136.39   37.85
  -6  -5   3 2434.09   79.98
   6   5  -3 2449.60   80.40
  -7  -5   3   38.57    4.91
   7   5  -3   31.69    4.39
  -8  -5   3   12.46    4.03
   8   5  -3   15.10    4.14
  -9  -5   3  506.46   17.99
   9   5  -3  482.27   17.37
 -10  -5   3  438.63   16.08
  10   5  -3  467.38   16.91
  10   5  -3  460.86   16.54
 -12  -5   3  128.99    7.08
  12   5  -3  145.23    7.70
  12   5  -3  147.81    7.29
 -13  -5   3   73.31    6.15
  13   5  -3   84.53    6.26
  13   5  -3   86.70    5.95
 -14  -5   3  121.96    7.29
  14   5  -3  110.85    6.72
  14   5  -3  110.74    6.51
 -15  -5   3  508.12   18.25
  15   5  -3  558.37   19.54
  15   5  -3  522.18   18.35
  16   5  -3  111.16    6.31
  16   5  -3  111.05    5.69
  15  -6   3  345.73   12.82
  15  -6   3  343.50   12.87
  14  -6   3  150.76    7.76
  14  -6   3  161.77    7.55
  13  -6   3   83.86    5.58
  13  -6   3   71.09    6.15
  12  -6   3    6.67    4.70
  12  -6   3    0.31    5.48
  11  -6   3  551.13   19.49
  11  -6   3  560.44   19.85
 -11   6  -3  527.87   18.61
  10  -6   3 1228.42   41.26
  10  -6   3 1234.11   41.36
 -10   6  -3 1181.89   39.55
   9  -6   3  298.73   11.68
   9  -6   3  265.33   10.86
  -9   6  -3  279.86   10.86
  -8   6  -3  173.04    7.60
   7  -6   3  901.15   30.50
  -7   6  -3  866.51   29.31
   6  -6   3 1338.54   44.46
  -6   6  -3 1340.61   44.51
   5  -6   3  455.18   16.08
  -5   6  -3  458.74   16.13
   4  -6   3  813.26   27.35
  -4   6  -3  813.26   27.35
   3  -6   3  191.14    7.65
  -3   6  -3  175.78    7.24
   2  -6   3 1314.76   43.53
  -2   6  -3 1359.74   44.93
   1  -6   3 2564.38   84.01
  -1   6  -3 2516.29   82.36
   0  -6   3   24.25    3.57
   0   6  -3   23.27    3.62
  -1  -6   3  151.95    6.77
   1   6  -3  154.07    6.67
  -3  -6   3  871.16   29.37
   3   6  -3  818.95   27.61
   4   6  -3 4605.02  150.19
  -5  -6   3 1707.69   56.46
   5   6  -3 1745.95   57.60
  -6  -6   3   -0.67    4.29
   6   6  -3   10.55    4.34
  -7  -6   3  402.70   14.79
   7   6  -3  398.41   14.42
  -8  -6   3  101.23    5.79
   8   6  -3   92.49    5.95
  -9  -6   3   11.94    4.70
   9   6  -3   14.58    4.34
 -10  -6   3   33.71    4.55
  10   6  -3   38.41    4.91
 -11  -6   3  617.31   21.87
  11   6  -3  592.49   20.84
  11   6  -3  584.22   20.58
 -12  -6   3  950.78   32.36
  12   6  -3  871.68   29.68
  12   6  -3  863.93   29.47
 -13  -6   3  693.31   24.20
  13   6  -3  705.20   24.30
  13   6  -3  706.24   24.35
 -14  -6   3  203.86    9.05
  14   6  -3  238.60    9.82
  14   6  -3  231.67    9.77
 -15  -6   3   26.37    5.17
  15   6  -3   27.92    4.91
  15   6  -3   21.30    4.45
 -16  -6   3   47.67    5.17
  16   6  -3   44.46    4.29
  16   6  -3   43.22    5.17
  15  -7   3    9.31    4.34
  15  -7   3    6.72    5.12
  14  -7   3   35.26    4.60
  14  -7   3   31.80    5.79
  13  -7   3   58.73    5.79
  13  -7   3   61.27    5.43
  12  -7   3    3.52    4.86
  12  -7   3    6.93    4.96
 -12   7  -3   11.63    4.19
  11  -7   3   35.11    4.96
  11  -7   3   32.57    5.48
 -11   7  -3   37.33    4.55
  10  -7   3  270.60   11.17
  10  -7   3  233.33    9.77
 -10   7  -3  240.51    9.82
   9  -7   3  235.76    9.98
   9  -7   3  226.86    9.77
  -9   7  -3  232.60    9.51
   8  -7   3 1720.10   57.03
   8  -7   3 1837.98   60.85
  -8   7  -3 1745.43   57.75
   7  -7   3   -2.12    4.08
  -7   7  -3    6.05    3.88
   6  -7   3   25.02    4.19
  -6   7  -3   25.54    3.98
   5  -7   3    1.24    3.83
  -5   7  -3    9.72    3.52
   4  -7   3  867.03   29.21
  -4   7  -3  806.02   27.30
   3  -7   3   16.18    3.67
  -3   7  -3   16.80    3.83
   2  -7   3   70.31    4.65
  -2   7  -3   75.02    4.70
   1  -7   3 1264.09   41.98
  -1   7  -3 1288.39   42.65
   0  -7   3  780.69   26.42
   0   7  -3  795.16   26.78
  -1  -7   3   19.39    3.98
   1   7  -3   17.68    3.62
  -2  -7   3 2299.67   75.59
   2   7  -3 2388.59   78.33
  -3  -7   3  933.72   31.54
   3   7  -3  809.12   27.35
  -4  -7   3 1562.41   51.75
   4   7  -3 1378.87   45.76
  -5  -7   3  257.26   10.34
   5   7  -3  199.51    8.48
  -6  -7   3 1143.63   38.31
   6   7  -3 1193.26   39.81
  -7  -7   3  124.29    6.57
   7   7  -3  112.66    6.26
  -8  -7   3  681.42   23.68
   8   7  -3  689.69   23.83
  -9  -7   3 1045.91   35.36
   9   7  -3  852.03   28.95
 -10  -7   3  219.88    9.56
  10   7  -3  229.35    9.77
 -11  -7   3   36.60    5.38
  11   7  -3   34.59    5.17
 -13  -7   3  183.07    8.48
  13   7  -3  171.29    8.07
  13   7  -3  182.14    8.12
 -14  -7   3  387.03   14.32
  14   7  -3  370.80   13.75
  14   7  -3  384.86   13.96
 -15  -7   3   87.32    5.53
  15   7  -3   94.66    5.17
  15   7  -3  103.09    6.15
 -16  -7   3   34.59    4.60
  16   7  -3   28.85    4.60
  16   7  -3   30.25    3.77
  14  -8   3    6.62    4.96
  14  -8   3   -1.40    4.03
  13  -8   3   42.14    5.53
  13  -8   3   26.42    4.34
 -13   8  -3   23.52    4.45
  12  -8   3    9.20    4.19
  12  -8   3   -7.08    5.38
 -12   8  -3    2.90    4.08
  11  -8   3   58.78    5.33
  11  -8   3   66.02    6.15
 -11   8  -3   63.18    4.91
  10  -8   3  119.79    6.57
  10  -8   3  120.15    6.88
 -10   8  -3  118.09    6.41
   9  -8   3   16.60    5.02
   9  -8   3   13.18    4.55
  -9   8  -3   15.05    4.24
   8  -8   3  172.58    8.17
  -8   8  -3  161.26    7.44
   7  -8   3   92.96    5.74
  -7   8  -3   85.62    5.27
   6  -8   3  107.23    5.95
  -6   8  -3  110.85    5.95
   5  -8   3  350.84   12.93
  -5   8  -3  358.75   13.18
   4  -8   3  148.07    6.93
  -4   8  -3  155.05    6.98
   3  -8   3    3.67    3.77
  -3   8  -3    0.00    3.57
   2  -8   3  208.82    8.48
  -2   8  -3  210.27    8.53
   1  -8   3   60.49    4.65
  -1   8  -3   59.20    4.50
   0  -8   3  359.94   13.18
   0   8  -3  352.45   12.82
  -1  -8   3 1134.32   37.95
   1   8  -3 1045.91   35.00
  -2  -8   3  965.78   32.47
   2   8  -3  824.12   27.87
  -3  -8   3  843.25   28.64
   3   8  -3  777.59   26.47
  -4  -8   3  436.20   15.77
   4   8  -3  471.31   16.70
  -5  -8   3  877.37   29.73
   5   8  -3  918.73   31.07
  -6  -8   3  658.67   22.90
   6   8  -3  600.77   20.89
  -7  -8   3   10.34    4.70
   7   8  -3   15.10    4.45
  -8  -8   3 1229.97   41.26
   8   8  -3 1490.03   49.58
  -9  -8   3  420.59   15.61
   9   8  -3  404.04   14.89
 -10  -8   3  110.33    6.72
  10   8  -3   93.53    6.15
 -11  -8   3  137.94    7.29
  11   8  -3  132.25    6.82
 -12  -8   3  170.72    8.27
  12   8  -3  158.41    8.01
  12   8  -3  139.85    7.19
 -13  -8   3   45.03    5.53
  13   8  -3   48.91    5.02
  13   8  -3   33.71    4.86
 -14  -8   3   -1.76    4.50
  14   8  -3   -4.86    4.45
  14   8  -3    1.09    3.93
 -15  -8   3   24.92    4.14
  15   8  -3   12.93    4.19
  15   8  -3   21.87    3.57
  14  -9   3   15.82    4.08
  14  -9   3    2.84    5.12
  13  -9   3   21.87    4.14
  13  -9   3   34.59    5.22
 -13   9  -3   25.49    4.45
  12  -9   3  393.86   14.79
  12  -9   3  377.78   13.80
 -12   9  -3  365.63   13.49
  11  -9   3   82.15    5.58
  11  -9   3   83.29    6.41
 -11   9  -3   81.53    5.58
  10  -9   3  549.07   19.65
  10  -9   3  516.86   18.25
 -10   9  -3  504.40   17.89
   9  -9   3  664.36   23.11
  -9   9  -3  727.95   25.02
   8  -9   3 1831.25   60.80
  -8   9  -3 1798.68   59.46
   7  -9   3  191.40    8.48
  -7   9  -3  164.10    7.44
   6  -9   3   35.73    4.60
  -6   9  -3   31.69    4.19
   5  -9   3 2702.42   88.82
  -5   9  -3 2711.72   88.98
   4  -9   3  712.44   24.51
  -4   9  -3  709.86   24.30
   3  -9   3  389.83   14.22
  -3   9  -3  402.70   14.48
   2  -9   3    6.51    3.77
  -2   9  -3   -0.62    3.83
   1  -9   3  645.23   22.28
  -1   9  -3  664.88   22.85
   0  -9   3 4301.53  140.47
   0   9  -3 4059.57  132.61
  -1  -9   3  874.78   29.62
   1   9  -3  793.61   26.94
  -2  -9   3 1725.78   57.03
   2   9  -3 1826.60   60.28
  -3  -9   3  791.54   26.88
   3   9  -3  828.25   28.02
  -4  -9   3  275.46   10.81
   4   9  -3  312.22   11.79
  -5  -9   3  947.16   32.21
   5   9  -3  852.55   28.90
  -6  -9   3  271.84   11.06
   6   9  -3  239.27    9.82
  -7  -9   3 1276.50   42.86
   7   9  -3 1163.28   39.03
  -8  -9   3  236.43    9.87
   8   9  -3  251.89   10.34
  -9  -9   3   25.13    5.02
   9   9  -3   32.05    4.91
 -10  -9   3  604.90   21.30
  10   9  -3  489.56   17.53
 -11  -9   3  222.06    9.72
  11   9  -3  239.27    9.93
 -12  -9   3   28.85    5.12
  12   9  -3   20.89    4.81
 -13  -9   3  749.15   25.80
 -14  -9   3  212.70    9.00
  14   9  -3  235.76    9.67
  14   9  -3  204.79    8.38
 -15  -9   3   31.80    4.39
  15   9  -3   41.88    3.88
  15   9  -3   35.52    4.60
  13 -10   3  159.39    7.24
  13 -10   3  157.53    7.91
 -13  10  -3  163.53    7.29
  12 -10   3   17.42    5.27
  12 -10   3   11.12    4.29
 -12  10  -3    6.51    4.39
  11 -10   3  336.06   12.67
  11 -10   3  341.33   13.29
 -11  10  -3  322.93   12.20
  10 -10   3  513.29   18.46
  10 -10   3  519.08   18.41
 -10  10  -3  467.27   16.65
   9 -10   3  274.84   10.75
  -9  10  -3  261.56   10.34
   8 -10   3  157.12    7.50
  -8  10  -3  149.57    7.39
   7 -10   3    3.83    4.55
  -7  10  -3    5.27    4.24
   6 -10   3  180.54    8.32
  -6  10  -3  165.03    7.60
   5 -10   3   17.22    4.29
  -5  10  -3    2.27    3.98
   4 -10   3    1.71    4.50
  -4  10  -3   -1.19    3.98
   3 -10   3  290.30   11.27
  -3  10  -3  275.21   10.70
   2 -10   3 2351.88   77.34
  -2  10  -3 2275.37   74.81
   1 -10   3 1946.55   64.26
  -1  10  -3 1773.35   58.58
   0 -10   3 1475.55   49.12
   0  10  -3 1403.17   46.63
  -1 -10   3  237.57    9.87
   1  10  -3  230.69    9.36
  -2 -10   3  358.60   13.49
   2  10  -3  347.33   12.98
  -3 -10   3   43.64    5.12
   3  10  -3   51.86    4.91
  -4 -10   3 1992.04   65.82
   4  10  -3 1980.15   65.30
  -5 -10   3  252.15   10.55
   5  10  -3  256.70   10.29
  -6 -10   3 3169.80  103.97
   6  10  -3 2968.68   97.35
  -7 -10   3  171.18    8.22
   7  10  -3  155.67    7.60
  -8 -10   3  383.93   14.42
   8  10  -3  315.07   12.20
  -9 -10   3 1163.79   39.14
   9  10  -3 1009.21   34.07
 -10 -10   3    5.53    4.50
  10  10  -3    9.00    4.65
 -11 -10   3   36.71    5.33
  11  10  -3   47.67    5.43
 -12 -10   3  111.36    6.62
  12  10  -3   89.44    6.15
 -13 -10   3  245.17    9.98
  13  10  -3  263.83   10.39
  13  10  -3  263.93   10.13
 -14 -10   3   17.11    4.39
  14  10  -3   17.58    3.77
  14  10  -3   25.39    4.19
  13 -11   3  208.05    8.58
  13 -11   3  218.33    9.41
 -13  11  -3  235.81    9.25
  12 -11   3  215.13    9.36
  12 -11   3  231.05    9.20
 -12  11  -3  236.74    9.46
  11 -11   3   37.54    4.70
  11 -11   3   35.21    5.38
 -11  11  -3   42.55    4.91
  10 -11   3  205.93    8.74
 -10  11  -3  199.51    8.53
   9 -11   3    0.36    4.50
  -9  11  -3    5.74    4.34
   8 -11   3   23.01    4.55
  -8  11  -3   22.18    4.45
   7 -11   3   16.34    4.55
  -7  11  -3   14.06    4.60
   6 -11   3  112.40    6.72
  -6  11  -3   98.34    6.05
   5 -11   3  650.40   22.70
  -5  11  -3  664.88   22.96
   4 -11   3  662.29   23.11
  -4  11  -3  644.20   22.39
   3 -11   3  394.58   14.48
  -3  11  -3  371.89   13.75
   2 -11   3  957.51   32.47
  -2  11  -3  920.28   31.12
   1 -11   3  298.37   11.63
  -1  11  -3  257.78   10.13
   0 -11   3  119.17    6.72
   0  11  -3  123.26    6.46
  -1 -11   3  720.71   25.02
   1  11  -3  721.75   24.66
  -2 -11   3   30.35    5.02
   2  11  -3   21.46    4.50
  -3 -11   3   18.30    4.96
   3  11  -3   17.47    4.34
  -4 -11   3   77.45    6.00
   4  11  -3   84.89    5.79
  -5 -11   3   12.25    4.81
   5  11  -3    3.31    4.39
  -6 -11   3   22.85    4.86
   6  11  -3    6.20    4.50
  -7 -11   3  142.02    7.70
   7  11  -3  127.91    7.03
  -8 -11   3   25.33    5.22
   8  11  -3   31.02    5.07
  -9 -11   3  329.03   12.87
   9  11  -3  342.11   13.03
 -10 -11   3  300.23   12.05
  10  11  -3  306.48   12.05
 -11 -11   3   48.96    5.48
  11  11  -3   63.54    5.69
 -12 -11   3  203.03    8.79
  12  11  -3  212.18    8.84
 -13 -11   3  173.51    7.60
  13  11  -3  160.33    7.03
  14  11  -3  119.58    6.36
  12 -12   3   -1.19    4.29
  12 -12   3   -0.41    4.91
 -12  12  -3    1.34    4.03
  11 -12   3    9.82    5.43
  11 -12   3   11.22    4.34
 -11  12  -3    6.31    4.19
  10 -12   3  116.43    6.31
 -10  12  -3  123.98    6.67
   9 -12   3  165.24    7.91
  -9  12  -3  154.33    7.29
   8 -12   3  159.34    7.70
  -8  12  -3  151.33    7.19
   7 -12   3   15.05    4.70
  -7  12  -3   14.22    4.45
   6 -12   3  118.96    6.82
  -6  12  -3  124.03    6.67
   5 -12   3   73.36    5.79
  -5  12  -3   76.78    5.69
   4 -12   3  169.32    8.07
  -4  12  -3  170.10    7.81
   3 -12   3    2.90    4.39
  -3  12  -3   -0.98    4.19
   2 -12   3  233.33    9.87
  -2  12  -3  250.85   10.13
   1 -12   3  703.14   24.51
  -1  12  -3  592.49   20.68
   0 -12   3  617.31   21.82
   0  12  -3  573.37   20.06
  -1 -12   3    8.48    4.86
   1  12  -3   10.19    4.50
  -2 -12   3    2.53    5.12
   2  12  -3    5.38    4.55
  -3 -12   3  391.48   14.79
   3  12  -3  391.22   14.32
  -4 -12   3   56.20    5.64
   4  12  -3   55.17    5.12
  -5 -12   3    5.53    5.02
   5  12  -3    8.12    4.39
  -6 -12   3  980.25   33.40
   6  12  -3 1001.45   33.86
  -7 -12   3  519.08   18.72
   7  12  -3  495.61   17.63
  -8 -12   3  214.51    9.67
   8  12  -3  185.76    8.48
  -9 -12   3  503.10   18.20
   9  12  -3  529.42   18.87
 -10 -12   3    9.10    5.33
  10  12  -3   24.82    4.76
 -11 -12   3   79.10    5.69
  11  12  -3   76.36    5.48
 -12 -12   3  185.04    8.17
  12  12  -3  161.15    7.34
 -13 -12   3  130.44    5.95
  13  12  -3  123.57    6.00
  11 -13   3  151.59    7.65
  11 -13   3  168.75    7.65
 -11  13  -3  174.54    7.65
  10 -13   3   37.07    4.76
 -10  13  -3   39.14    4.65
   9 -13   3  118.81    6.67
  -9  13  -3  106.71    6.20
   8 -13   3   41.67    4.91
  -8  13  -3   36.40    4.76
   7 -13   3  245.79   10.13
  -7  13  -3  274.17   10.86
   6 -13   3   13.55    4.55
  -6  13  -3    7.39    4.29
   5 -13   3  466.71   16.96
  -5  13  -3  478.03   17.16
   4 -13   3 1417.65   47.36
  -4  13  -3 1498.30   49.84
   3 -13   3   61.32    5.48
  -3  13  -3   62.51    5.33
   2 -13   3  476.06   17.37
  -2  13  -3  420.74   15.36
   1 -13   3  700.03   24.45
  -1  13  -3  677.28   23.47
   0 -13   3  834.46   28.69
   0  13  -3  798.78   27.30
  -1 -13   3  515.05   18.72
   1  13  -3  445.35   16.18
  -2 -13   3  396.13   14.89
   2  13  -3  403.37   14.84
  -3 -13   3   91.41    6.31
   3  13  -3   84.22    5.89
  -4 -13   3   29.11    5.17
   4  13  -3   26.47    4.81
  -5 -13   3   12.15    5.02
   5  13  -3    6.93    4.60
  -6 -13   3 1055.74   35.73
   6  13  -3  870.13   29.68
  -7 -13   3   12.62    4.81
   7  13  -3    8.48    4.50
  -8 -13   3  106.76    6.72
   8  13  -3  105.99    6.31
  -9 -13   3  294.49   11.68
   9  13  -3  269.52   10.91
 -10 -13   3  274.17   11.06
  10  13  -3  302.61   11.74
 -11 -13   3   29.93    4.55
  11  13  -3   23.52    4.19
 -12 -13   3   -3.36    4.24
  12  13  -3   -6.67    3.72
  11 -14   3  154.33    7.19
 -11  14  -3  172.94    7.34
  10 -14   3   16.03    4.45
 -10  14  -3   11.63    4.08
   9 -14   3    6.10    4.19
  -9  14  -3   10.34    4.50
   8 -14   3  141.14    7.13
  -8  14  -3  136.70    6.98
   7 -14   3  514.32   18.25
  -7  14  -3  448.77   16.13
   6 -14   3 1497.78   49.79
  -6  14  -3 1410.92   46.94
   5 -14   3  857.20   29.21
  -5  14  -3  789.99   27.04
   4 -14   3  138.04    7.24
  -4  14  -3  124.75    6.82
   3 -14   3   -0.31    4.76
  -3  14  -3   -2.07    4.45
   2 -14   3   54.80    5.48
  -2  14  -3   43.43    5.17
   1 -14   3  495.45   17.94
  -1  14  -3  405.03   14.89
   0 -14   3   37.59    5.43
   0  14  -3   43.74    5.07
  -1 -14   3   38.36    5.48
   1  14  -3   29.11    4.86
  -2 -14   3 1538.11   51.39
   2  14  -3 1581.54   52.63
  -3 -14   3 1057.81   35.83
   3  14  -3 1033.51   34.79
  -4 -14   3   35.05    5.17
   4  14  -3   30.76    4.76
  -5 -14   3  133.70    7.70
   5  14  -3  129.92    6.93
  -6 -14   3  425.91   15.77
   6  14  -3  410.35   15.15
  -7 -14   3  148.69    7.76
   7  14  -3  128.94    6.93
  -8 -14   3  225.57    9.77
   8  14  -3  216.01    9.10
  -9 -14   3    6.88    4.65
   9  14  -3   14.79    4.34
 -10 -14   3  509.88   17.94
  10  14  -3  526.83   18.41
 -11 -14   3  617.31   21.20
  11  14  -3  743.46   25.13
   9 -15   3  101.39    5.95
  -9  15  -3   92.39    5.48
   8 -15   3   29.68    4.45
  -8  15  -3   27.25    4.76
   7 -15   3  239.32    9.62
  -7  15  -3  210.37    9.00
   6 -15   3   47.62    5.27
  -6  15  -3   52.84    4.91
   5 -15   3    0.10    4.39
  -5  15  -3   -2.53    4.19
   4 -15   3    4.29    4.45
  -4  15  -3    6.88    4.60
   3 -15   3   39.14    5.12
  -3  15  -3   43.74    4.96
   2 -15   3   14.17    5.17
  -2  15  -3   15.61    4.65
   1 -15   3  254.63   10.60
  -1  15  -3  240.51   10.03
   0 -15   3   26.68    5.22
   0  15  -3   32.11    4.96
  -1 -15   3  158.62    8.22
   1  15  -3  162.50    7.96
  -2 -15   3  228.42    9.98
   2  15  -3  215.54    9.36
  -3 -15   3   53.25    5.74
   3  15  -3   45.76    5.22
  -4 -15   3    7.19    4.96
   4  15  -3    4.08    4.70
  -5 -15   3  137.06    7.24
   5  15  -3  119.95    6.88
  -6 -15   3    3.83    4.45
   6  15  -3    6.36    4.60
  -7 -15   3   48.50    5.38
   7  15  -3   47.72    4.96
  -8 -15   3    2.27    4.70
   8  15  -3    5.48    4.39
  -9 -15   3  292.63   11.12
   9  15  -3  285.91   10.81
 -10 -15   3   14.17    4.34
  10  15  -3    8.38    4.19
   8 -16   3    0.05    4.34
  -8  16  -3   -0.93    4.19
   7 -16   3  130.91    6.77
  -7  16  -3  130.13    6.51
   6 -16   3  132.98    6.93
  -6  16  -3  136.18    6.82
   5 -16   3  156.81    7.50
  -5  16  -3  149.00    7.24
   4 -16   3   12.30    4.70
  -4  16  -3   -1.24    4.29
   3 -16   3   74.60    5.79
  -3  16  -3   83.60    5.69
   2 -16   3    6.05    4.70
  -2  16  -3    1.45    4.29
   1 -16   3   20.53    4.86
  -1  16  -3    8.89    4.14
   0 -16   3   31.74    4.86
   0  16  -3   28.90    4.76
  -1 -16   3   51.18    5.33
   1  16  -3   65.97    5.43
  -2 -16   3   96.89    6.26
   2  16  -3   85.77    5.89
  -3 -16   3  100.15    6.51
   3  16  -3  102.01    6.20
  -4 -16   3  232.86    9.72
   4  16  -3  211.30    8.89
  -5 -16   3  339.93   12.93
   5  16  -3  294.54   11.48
  -6 -16   3   10.39    4.60
   6  16  -3   -6.05    4.29
  -7 -16   3  118.09    6.51
   7  16  -3  108.06    6.05
  -8 -16   3  382.64   13.96
   8  16  -3  419.97   14.94
   6 -17   3   34.02    4.81
  -6  17  -3   34.43    4.45
   5 -17   3    5.58    4.60
  -5  17  -3    4.91    4.24
   4 -17   3  517.01   18.20
  -4  17  -3  436.82   15.67
   3 -17   3  331.66   12.56
  -3  17  -3  320.44   12.10
   2 -17   3   95.23    6.10
  -2  17  -3   88.87    5.69
   1 -17   3   -1.24    4.55
  -1  17  -3   -1.71    4.29
   0 -17   3  219.83    9.41
   0  17  -3  212.49    8.94
  -1 -17   3   51.75    5.33
   1  17  -3   60.34    5.22
  -2 -17   3   13.70    4.50
   2  17  -3   11.32    4.45
  -3 -17   3   38.10    5.17
   3  17  -3   29.78    4.60
  -4 -17   3  105.83    6.57
   4  17  -3   85.36    5.69
  -5 -17   3  402.03   14.73
   5  17  -3  407.35   14.68
  -6 -17   3  160.22    7.55
   6  17  -3  163.43    7.39
   7  17  -3   49.32    4.65
   4 -18   3   20.32    4.60
  -4  18  -3   30.97    4.39
   3 -18   3  387.40   14.06
  -3  18  -3  346.40   12.77
   2 -18   3  281.87   10.96
  -2  18  -3  270.29   10.70
   1 -18   3  498.35   17.63
  -1  18  -3  471.05   16.65
   0 -18   3  185.87    8.38
   0  18  -3  182.61    8.01
  -1 -18   3   17.37    4.76
   1  18  -3   19.54    4.50
  -2 -18   3   20.89    4.81
   2  18  -3   35.42    4.60
  -3 -18   3   11.53    4.70
   3  18  -3    2.59    4.34
  -4 -18   3   26.11    4.60
   4  18  -3   21.51    4.19
   2  17   4  217.40    8.84
  -2 -17  -4  216.27    8.84
   1  17   4  277.58   10.55
  -1 -17  -4  262.75   10.19
   0  17   4    9.31    3.93
   0 -17  -4   11.63    4.19
  -1  17   4    5.33    3.98
   1 -17  -4    4.39    4.34
  -2  17   4   31.02    4.24
   2 -17  -4   30.87    4.29
  -3  17   4   41.88    4.24
   3 -17  -4   50.41    4.50
  -4  17   4   14.22    3.62
   4 -17  -4   12.41    4.03
  -5  17   4  212.39    8.43
   5 -17  -4  202.31    8.22
  -6  17   4   70.37    4.86
   6 -17  -4   85.93    5.17
   4  16   4   96.22    5.74
  -4 -16  -4  106.61    6.15
   3  16   4  367.03   13.34
  -3 -16  -4  351.72   13.13
   2  16   4  138.51    6.62
  -2 -16  -4  181.06    8.17
   1  16   4  409.06   14.63
  -1 -16  -4  419.14   15.51
   0  16   4  268.07   10.29
   0 -16  -4  295.16   11.43
  -1  16   4  108.68    5.95
   1 -16  -4  120.62    6.46
  -2  16   4   85.98    5.38
   2 -16  -4   99.47    6.05
  -3  16   4  155.10    7.19
   3 -16  -4  180.02    8.07
  -4  16   4  877.89   29.47
   4 -16  -4  953.89   32.00
  -5  16   4   70.21    4.91
   5 -16  -4   87.22    5.43
  -6  16   4   -3.31    3.77
   6 -16  -4   -3.67    4.19
  -7  16   4   15.30    4.19
   7 -16  -4    7.08    4.19
  -8  16   4   44.93    4.39
   8 -16  -4   54.49    4.86
   6  15   4  486.30   17.16
  -6 -15  -4  584.74   20.42
   5  15   4  180.95    7.91
  -5 -15  -4  202.31    8.84
   4  15   4   74.60    5.48
  -4 -15  -4   79.52    5.89
   3  15   4   12.87    4.14
  -3 -15  -4   13.70    4.86
   2  15   4    6.31    4.19
  -2 -15  -4   12.93    4.91
   1  15   4   32.21    4.39
  -1 -15  -4   42.50    5.17
   0  15   4   68.35    5.27
   0 -15  -4   92.55    6.05
  -1  15   4  621.45   21.40
   1 -15  -4  580.09   20.32
  -2  15   4  694.86   23.83
   2 -15  -4  633.86   22.02
  -4  15   4  120.41    6.62
   4 -15  -4  106.30    6.31
  -5  15   4  576.47   20.16
   5 -15  -4  574.92   20.06
  -6  15   4    6.62    4.34
   6 -15  -4    4.81    4.39
  -7  15   4   15.92    4.34
   7 -15  -4    3.72    4.50
  -8  15   4  204.37    8.53
   8 -15  -4  202.77    8.48
  -9  15   4   25.39    4.08
   9 -15  -4   24.35    4.39
 -10  15   4  184.52    7.76
  10 -15  -4  223.45    9.00
   8  14   4    5.22    4.81
  -8 -14  -4   22.90    4.81
   7  14   4   -4.91    4.39
  -7 -14  -4    0.21    4.65
   6  14   4   46.74    5.07
  -6 -14  -4   52.01    5.33
   5  14   4    1.86    4.45
  -5 -14  -4   10.91    4.81
   4  14   4    3.62    4.19
  -4 -14  -4   -3.93    4.86
   3  14   4    6.26    4.39
  -3 -14  -4    8.89    4.60
   2  14   4    7.70    4.34
  -2 -14  -4   14.89    4.96
   1  14   4   15.77    4.39
  -1 -14  -4    6.41    4.96
   0  14   4   76.83    5.58
   0 -14  -4   96.89    6.77
  -1  14   4   20.27    4.60
   1 -14  -4   19.39    5.02
  -2  14   4   15.72    4.55
   2 -14  -4   20.01    5.07
  -3  14   4   38.21    4.70
   3 -14  -4   33.61    5.12
  -4  14   4  973.53   32.83
   4 -14  -4  840.66   28.64
  -5  14   4  104.85    6.20
   5 -14  -4   97.87    6.15
  -6  14   4   56.30    5.27
   6 -14  -4   46.94    5.17
  -7  14   4   62.40    5.38
   7 -14  -4   59.87    5.64
  -8  14   4   52.17    4.86
   8 -14  -4   51.86    5.12
  -9  14   4   37.79    4.55
   9 -14  -4   50.36    5.17
 -10  14   4    6.88    4.14
  10 -14  -4    7.76    4.39
 -11  14   4   -1.09    4.03
  11 -14  -4    0.62    4.08
   9  13   4   16.18    4.39
  -9 -13  -4    9.31    4.50
   8  13   4   18.82    4.86
  -8 -13  -4   28.90    5.02
   7  13   4  288.08   11.17
  -7 -13  -4  300.75   11.89
   6  13   4  580.09   20.27
  -6 -13  -4  488.11   17.63
   5  13   4  146.99    7.19
  -5 -13  -4  132.20    7.13
   4  13   4   32.68    4.91
  -4 -13  -4   38.31    5.27
   3  13   4   63.02    5.53
  -3 -13  -4   59.46    5.74
   2  13   4   35.98    4.96
  -2 -13  -4   41.62    5.27
   1  13   4    4.08    4.70
  -1 -13  -4    8.89    4.86
   0  13   4  265.90   10.65
   0 -13  -4  304.99   12.05
  -1  13   4 1188.61   39.86
   1 -13  -4 1305.45   43.74
  -2  13   4 1110.02   37.38
   2 -13  -4 1186.02   39.86
  -3  13   4   35.21    4.70
   3 -13  -4   39.71    5.22
  -5  13   4  553.72   19.39
   5 -13  -4  623.00   21.77
  -6  13   4  141.97    7.19
   6 -13  -4  155.62    7.76
  -7  13   4    8.12    4.65
   7 -13  -4    8.38    4.70
  -8  13   4   39.65    4.96
   8 -13  -4   46.79    5.27
  -9  13   4    7.29    4.60
   9 -13  -4    4.45    4.29
 -10  13   4  353.48   13.18
  10 -13  -4  369.71   13.65
 -11  13   4  194.60    8.27
  11 -13  -4  232.19    9.41
 -12  13   4   -1.50    3.77
  12 -13  -4    3.52    4.14
  10  12   4  139.13    7.19
 -10 -12  -4  166.43    8.12
   9  12   4   11.53    4.55
  -9 -12  -4   13.80    4.86
   8  12   4   20.22    4.76
  -8 -12  -4   26.21    5.22
   7  12   4  160.43    7.55
  -7 -12  -4  166.89    8.17
   6  12   4  398.20   14.63
  -6 -12  -4  379.38   14.27
   5  12   4 1011.27   34.28
  -5 -12  -4  958.02   32.52
   4  12   4  314.39   12.36
  -4 -12  -4  342.78   13.29
   3  12   4   25.70    4.91
  -3 -12  -4   26.73    5.22
   2  12   4  583.71   20.73
  -2 -12  -4  630.75   22.23
   1  12   4  163.89    8.07
  -1 -12  -4  178.94    8.58
   0  12   4  907.87   30.92
   0 -12  -4  996.80   33.86
  -1  12   4  472.70   17.06
   1 -12  -4  478.03   17.37
  -2  12   4  197.14    8.74
   2 -12  -4  183.90    8.53
  -3  12   4   85.82    5.79
   3 -12  -4   94.61    6.00
  -4  12   4  163.69    7.60
   4 -12  -4  167.51    7.86
  -5  12   4    2.27    4.34
   5 -12  -4    4.81    4.55
  -6  12   4  291.23   11.32
   6 -12  -4  327.84   12.56
  -7  12   4  135.51    6.93
   7 -12  -4  138.71    7.19
  -8  12   4 1296.66   43.22
   8 -12  -4 1358.19   45.39
  -9  12   4 1202.05   40.33
   9 -12  -4 1187.58   39.86
 -10  12   4  511.17   18.20
  10 -12  -4  525.28   18.72
 -11  12   4    1.60    4.34
  11 -12  -4   -2.53    4.55
 -12  12   4  258.30   10.13
  12 -12  -4  270.97   10.55
 -13  12   4   53.72    4.65
  13 -12  -4   49.01    4.70
  11  11   4  335.95   12.72
 -11 -11  -4  332.54   12.67
  10  11   4  413.30   15.05
 -10 -11  -4  443.80   16.23
   9  11   4   64.26    5.48
  -9 -11  -4   75.85    5.89
   8  11   4   21.09    4.86
  -8 -11  -4   25.28    5.17
   7  11   4   12.10    4.86
  -7 -11  -4    9.25    4.86
   6  11   4  336.78   12.93
  -6 -11  -4  354.26   13.70
   5  11   4  109.50    6.57
  -5 -11  -4  105.78    6.77
   4  11   4   87.63    6.15
  -4 -11  -4   98.44    6.57
   3  11   4  343.92   13.08
  -3 -11  -4  342.99   13.29
   2  11   4 1405.24   46.94
  -2 -11  -4 1547.93   51.55
   1  11   4    4.96    4.45
  -1 -11  -4    8.22    4.96
   0  11   4  119.38    6.57
   0 -11  -4  135.15    7.24
  -1  11   4   33.97    4.86
   1 -11  -4   23.32    4.96
  -2  11   4   64.26    5.22
   2 -11  -4   60.54    5.64
  -3  11   4   66.38    5.17
   3 -11  -4   58.16    5.43
  -4  11   4    4.50    4.34
   4 -11  -4   -3.72    4.39
  -6  11   4   55.63    4.81
   6 -11  -4   49.99    5.12
  -7  11   4 3196.68  104.69
   7 -11  -4 3027.62   99.32
  -8  11   4  919.76   31.12
   8 -11  -4  876.33   29.83
  -9  11   4  278.62   11.01
   9 -11  -4  325.36   12.41
 -10  11   4   75.90    5.43
  10 -11  -4   61.11    5.48
 -11  11   4  616.79   21.51
  11 -11  -4  669.53   23.16
 -12  11   4   14.84    4.55
  12 -11  -4   17.89    4.60
 -13  11   4    9.20    4.24
  13 -11  -4    6.62    3.93
 -14  11   4  202.46    8.38
  14 -11  -4  198.12    8.17
  11  10   4    1.19    4.65
 -11 -10  -4    7.34    5.02
  10  10   4   -0.83    4.60
 -10 -10  -4    9.46    5.12
   9  10   4   27.14    4.70
  -9 -10  -4   20.73    5.33
   8  10   4    4.55    4.76
  -8 -10  -4    8.01    5.02
   7  10   4    2.95    4.76
  -7 -10  -4    0.57    4.96
   6  10   4  406.27   15.10
  -6 -10  -4  383.98   14.58
   5  10   4  109.97    6.41
  -5 -10  -4  103.30    6.72
   4  10   4    5.43    4.45
  -4 -10  -4    3.88    4.70
   3  10   4  336.94   12.87
  -3 -10  -4  310.26   12.25
   2  10   4  124.75    6.82
  -2 -10  -4  146.83    7.39
   1  10   4  378.25   14.06
  -1 -10  -4  389.31   14.48
   0  10   4  291.54   11.48
   0 -10  -4  314.19   12.25
  -1  10   4 1211.87   40.53
   1 -10  -4 1198.95   40.22
  -2  10   4   14.22    4.14
   2 -10  -4    8.48    4.55
  -3  10   4  103.51    6.10
   3 -10  -4  104.59    6.31
  -4  10   4  808.09   27.56
   4 -10  -4  912.01   30.97
  -5  10   4   37.59    4.70
   5 -10  -4   41.31    4.96
  -6  10   4    7.70    4.03
   6 -10  -4    0.98    4.08
  -7  10   4  179.14    7.96
   7 -10  -4  196.15    8.63
  -8  10   4  794.65   27.09
   8 -10  -4  785.34   26.94
  -9  10   4  156.50    7.39
   9 -10  -4  174.39    7.96
 -10  10   4  153.97    7.34
  10 -10  -4  146.57    7.24
 -11  10   4   36.29    4.76
  11 -10  -4   39.81    4.91
 -12  10   4   -2.12    4.29
  12 -10  -4   -2.84    4.45
 -13  10   4  302.81   11.53
  13 -10  -4  300.13   11.63
 -14  10   4  177.80    7.76
  14 -10  -4  174.18    7.81
 -15  10   4  139.59    6.62
  15 -10  -4  135.72    6.67
  15 -10  -4  154.79    7.60
  12   9   4  223.50    9.15
  12   9   4  214.46    9.31
 -12  -9  -4  235.09   10.03
  11   9   4   93.48    6.51
  11   9   4  112.14    5.95
 -11  -9  -4   87.17    6.41
  10   9   4  183.69    8.63
 -10  -9  -4  179.51    8.84
   9   9   4   19.13    5.27
  -9  -9  -4   23.16    5.33
   8   9   4  158.00    7.96
  -8  -9  -4  159.24    8.17
   7   9   4    9.62    5.07
  -7  -9  -4    7.96    4.96
   6   9   4  170.10    8.12
  -6  -9  -4  190.11    8.84
   5   9   4  901.15   30.66
  -5  -9  -4  870.13   29.73
   4   9   4  422.92   15.46
  -4  -9  -4  418.83   15.41
   3   9   4  685.56   23.73
  -3  -9  -4  588.88   20.73
   2   9   4  568.20   20.06
  -2  -9  -4  612.14   21.46
   1   9   4  536.66   18.87
  -1  -9  -4  571.30   20.11
   0   9   4   61.47    4.76
   0  -9  -4   67.31    5.38
  -1   9   4    9.56    4.14
   1  -9  -4   12.98    4.34
  -2   9   4  822.05   27.92
   2  -9  -4  804.47   27.40
  -3   9   4   37.69    4.50
   3  -9  -4   42.76    4.65
  -4   9   4  104.33    6.05
   4  -9  -4  100.09    5.89
  -5   9   4 1140.53   38.21
   5  -9  -4 1191.71   39.86
  -7   9   4  583.19   20.32
   7  -9  -4  556.82   19.59
  -8   9   4   21.04    4.34
   8  -9  -4   15.30    4.34
  -9   9   4   29.31    4.70
   9  -9  -4   33.09    4.65
 -10   9   4   10.65    4.50
  10  -9  -4    1.65    4.39
 -11   9   4  158.00    7.39
  11  -9  -4  158.10    7.44
 -12   9   4    8.53    4.45
  12  -9  -4    7.86    4.60
 -13   9   4   -1.81    4.39
  13  -9  -4   13.13    4.65
 -14   9   4    2.07    4.19
  14  -9  -4    5.07    4.34
  14  -9  -4    2.64    4.29
 -15   9   4   69.80    5.07
  15  -9  -4   71.66    5.02
  15  -9  -4   66.44    5.95
  13   8   4  295.21   11.12
  13   8   4  282.70   11.27
 -13  -8  -4  292.37   11.53
  12   8   4    9.10    4.55
  12   8   4    9.41    4.34
 -12  -8  -4    4.86    5.12
  11   8   4   24.45    5.02
  11   8   4   28.13    4.34
 -11  -8  -4   27.09    5.48
  10   8   4 1038.16   35.05
 -10  -8  -4 1064.01   36.09
   9   8   4 1326.13   44.36
  -9  -8  -4 1247.55   42.03
   8   8   4  812.74   27.92
  -8  -8  -4  868.06   29.78
   7   8   4   -1.91    4.65
  -7  -8  -4  -10.08    4.96
   6   8   4  164.05    7.96
  -6  -8  -4  153.14    7.55
   5   8   4  575.95   20.37
  -5  -8  -4  597.67   21.09
   4   8   4  123.46    7.03
  -4  -8  -4  116.12    6.72
   3   8   4 1573.27   52.22
  -3  -8  -4 1596.53   52.99
   2   8   4    3.88    4.03
  -2  -8  -4    9.72    4.60
   1   8   4  958.02   32.21
  -1  -8  -4  915.11   31.07
   0   8   4  584.74   20.37
   0  -8  -4  642.13   22.18
  -1   8   4  306.69   11.58
   1  -8  -4  360.25   13.24
  -2   8   4    0.10    3.83
   2  -8  -4   -0.10    3.88
  -3   8   4  517.01   17.99
   3  -8  -4  537.69   18.97
  -4   8   4 4738.93  154.59
   4  -8  -4 5069.81  165.34
  -5   8   4  998.35   33.50
   5  -8  -4 1001.45   33.71
  -6   8   4  308.66   11.63
   6  -8  -4  305.14   11.63
  -7   8   4  271.84   10.81
   7  -8  -4  277.17   10.81
  -8   8   4  370.23   13.55
   8  -8  -4  367.03   13.70
  -9   8   4  447.06   15.98
   9  -8  -4  450.16   16.23
 -10   8   4    1.40    4.39
  10  -8  -4    3.36    4.45
 -11   8   4   75.85    5.07
  11  -8  -4   70.00    5.53
 -12   8   4  591.98   20.73
  12  -8  -4  626.62   22.13
 -13   8   4 1314.76   44.00
  13  -8  -4 1360.26   45.45
 -14   8   4 1054.70   35.42
  14  -8  -4 1112.61   37.38
  14  -8  -4 1000.93   33.76
 -15   8   4  230.43    9.46
  15  -8  -4  243.00   10.13
  15  -8  -4  235.65    9.67
 -16   8   4   22.23    4.08
  16  -8  -4   22.65    4.45
  16  -8  -4   13.13    4.86
  13   7   4   23.06    5.02
  13   7   4   26.47    4.24
 -13  -7  -4   31.18    5.12
  12   7   4   85.77    6.10
  12   7   4   91.20    5.79
 -12  -7  -4   79.05    5.84
  11   7   4  126.15    6.57
  11   7   4  139.28    7.29
 -11  -7  -4  140.63    7.55
  10   7   4   -1.96    4.91
  10   7   4    2.84    4.45
 -10  -7  -4   -0.16    4.96
   9   7   4   94.25    6.31
  -9  -7  -4   95.91    6.31
   8   7   4  815.33   28.02
  -8  -7  -4  719.16   25.13
   7   7   4  362.79   13.80
  -7  -7  -4  406.94   15.46
   6   7   4   13.55    4.86
  -6  -7  -4   13.29    4.65
   5   7   4   49.58    5.33
  -5  -7  -4   44.57    5.12
   4   7   4  124.86    6.72
  -4  -7  -4  141.87    7.13
   3   7   4  529.94   18.51
  -3  -7  -4  590.43   20.68
   2   7   4 1638.41   54.18
  -2  -7  -4 1915.53   63.23
   1   7   4   96.58    5.64
  -1  -7  -4  103.45    5.95
   0   7   4  581.64   20.06
   0  -7  -4  516.75   18.25
  -1   7   4  445.46   15.72
   1  -7  -4  415.73   14.99
  -2   7   4 1639.44   54.18
   2  -7  -4 1807.99   59.66
  -3   7   4 1010.24   33.86
   3  -7  -4 1043.85   35.00
  -4   7   4  112.29    6.05
   4  -7  -4  113.07    6.15
  -5   7   4 1451.25   48.08
   5  -7  -4 1466.76   48.65
  -6   7   4  421.00   15.10
   6  -7  -4  396.60   14.42
  -7   7   4  449.33   16.08
   7  -7  -4  486.09   17.27
  -8   7   4  253.70   10.19
   8  -7  -4  262.64   10.39
  -9   7   4  357.31   13.29
   9  -7  -4  367.03   13.55
 -10   7   4  113.90    6.36
  10  -7  -4  112.50    6.46
 -11   7   4 1218.60   40.74
  11  -7  -4 1379.90   46.07
 -12   7   4  268.17   10.65
  12  -7  -4  280.48   11.12
 -13   7   4  204.06    9.00
  13  -7  -4  206.60    9.51
  13  -7  -4  225.99    9.67
 -14   7   4  156.03    7.60
  14  -7  -4  134.06    7.50
  14  -7  -4  147.56    7.34
 -15   7   4  382.17   13.96
  15  -7  -4  443.70   16.03
  15  -7  -4  421.62   15.36
 -16   7   4   -0.72    3.93
  16  -7  -4   -3.93    4.24
  16  -7  -4   -5.74    4.96
  14   6   4   41.31    4.50
  14   6   4   33.19    4.91
 -14  -6  -4   35.16    5.17
  13   6   4  269.93   10.86
  13   6   4  260.01   10.29
 -13  -6  -4  248.99   10.44
  12   6   4   16.13    4.50
  12   6   4   14.22    4.96
 -12  -6  -4   12.36    5.17
  11   6   4    6.26    4.70
  11   6   4   16.23    4.65
 -11  -6  -4    8.79    5.02
  10   6   4   -5.64    4.60
  10   6   4    0.47    4.50
 -10  -6  -4   -2.74    5.17
   9   6   4   33.19    5.07
  -9  -6  -4   32.57    5.02
   8   6   4  524.25   18.72
  -8  -6  -4  539.76   19.49
   7   6   4  239.07   10.03
  -7  -6  -4  221.80    9.72
   6   6   4    4.91    4.65
  -6  -6  -4    1.55    4.45
   5   6   4   36.76    4.81
  -5  -6  -4   32.73    4.70
   4   6   4  157.07    7.19
  -4  -6  -4  168.08    7.65
   3   6   4 1794.03   59.20
  -3  -6  -4 1772.83   58.58
   2   6   4  341.18   12.46
  -2  -6  -4  332.28   12.41
   1   6   4  740.88   25.23
  -1  -6  -4  700.55   23.94
   0   6   4  630.75   21.66
   0  -6  -4  637.99   21.92
  -1   6   4 3897.23  127.29
   1  -6  -4 4022.35  131.32
  -2   6   4   -0.62    3.98
   2  -6  -4    3.88    3.88
  -3   6   4  298.37   11.27
   3  -6  -4  302.61   11.43
  -4   6   4  442.25   15.72
   4  -6  -4  469.29   16.60
  -5   6   4 2121.81   69.74
   5  -6  -4 2430.47   79.83
  -6   6   4 1911.39   62.92
   6  -6  -4 1973.43   64.94
  -7   6   4    9.41    3.98
   7  -6  -4   10.81    3.83
  -8   6   4  428.76   15.46
   8  -6  -4  418.57   15.36
  -9   6   4  122.43    6.36
   9  -6  -4  131.68    6.77
 -10   6   4  390.09   14.27
  10  -6  -4  448.87   16.18
 -11   6   4   44.20    4.81
  11  -6  -4   67.73    5.64
 -12   6   4   12.05    4.50
  12  -6  -4   11.48    4.91
  12  -6  -4   13.75    5.33
 -13   6   4   17.99    4.70
  13  -6  -4   22.80    4.65
  13  -6  -4   19.49    5.69
 -14   6   4   25.08    4.81
  14  -6  -4   29.73    5.17
  14  -6  -4   39.76    5.38
 -15   6   4   23.94    4.60
  15  -6  -4   21.20    4.86
  15  -6  -4   24.56    5.27
 -16   6   4   -7.24    4.24
  16  -6  -4  -10.65    4.91
  16  -6  -4    1.34    4.24
 -17   6   4   19.70    4.19
  14   5   4   99.42    6.57
  14   5   4   91.92    5.53
  13   5   4    3.26    4.86
  13   5   4   -2.74    4.24
 -13  -5  -4   -3.05    4.91
  12   5   4  138.87    6.93
  12   5   4  131.99    7.44
 -12  -5  -4  129.98    7.55
  11   5   4  212.34    9.10
  11   5   4  206.03    9.31
 -11  -5  -4  217.09    9.62
  10   5   4  263.78   10.60
  10   5   4  264.55   10.96
 -10  -5  -4  271.43   11.32
   9   5   4   40.53    5.38
   9   5   4   35.93    5.02
  -9  -5  -4   37.02    5.48
   8   5   4  905.80   30.81
  -8  -5  -4  955.44   32.57
   7   5   4  420.18   15.46
  -7  -5  -4  423.38   15.56
   6   5   4  605.94   21.15
  -6  -5  -4  634.37   22.13
   5   5   4  964.23   32.52
  -5  -5  -4  996.80   33.61
   4   5   4  283.48   10.81
  -4  -5  -4  275.83   10.75
   3   5   4  553.72   19.13
  -3  -5  -4  646.78   22.18
   2   5   4  678.32   23.16
  -2  -5  -4  689.18   23.52
   1   5   4 1664.26   54.85
  -1  -5  -4 1612.04   53.25
   0   5   4  411.33   14.63
   0  -5  -4  451.20   15.98
  -1   5   4   29.93    4.19
   1  -5  -4   28.07    4.14
  -2   5   4  657.64   22.44
   2  -5  -4  622.48   21.30
  -3   5   4  187.88    8.07
   3  -5  -4  192.12    8.17
  -4   5   4  881.50   29.73
   4  -5  -4  950.78   31.90
  -5   5   4  110.02    5.58
   5  -5  -4  110.07    5.84
  -6   5   4 3043.65   99.58
   6  -5  -4 3498.62  114.52
  -7   5   4 2185.92   71.81
   7  -5  -4 2312.59   75.95
  -8   5   4   68.30    5.12
   8  -5  -4   84.58    5.27
  -9   5   4   74.97    5.38
   9  -5  -4   65.66    5.27
 -10   5   4  325.56   12.15
  10  -5  -4  350.84   13.18
 -11   5   4  853.59   28.95
  11  -5  -4  919.25   31.23
  11  -5  -4  927.00   31.54
 -12   5   4  185.40    7.96
  12  -5  -4  197.29    8.74
  12  -5  -4  190.11    8.94
 -13   5   4   12.25    4.55
  13  -5  -4    8.53    5.53
  13  -5  -4   15.30    4.86
 -14   5   4  139.39    7.13
  14  -5  -4  150.81    7.76
  14  -5  -4  158.93    7.81
 -15   5   4   74.97    5.48
  15  -5  -4   76.16    5.74
  15  -5  -4   73.52    5.74
 -16   5   4   15.77    4.24
  16  -5  -4   11.12    4.91
  16  -5  -4   10.03    4.29
  17  -5  -4   35.78    4.50
  17  -5  -4   29.57    5.17
  13   4   4  708.82   24.25
  13   4   4  690.21   23.83
  12   4   4   44.10    4.70
  12   4   4   52.27    5.74
 -12  -4  -4   43.74    5.64
  11   4   4   18.20    4.65
  11   4   4    8.74    4.81
 -11  -4  -4    3.83    5.22
  10   4   4  373.95   14.01
  10   4   4  340.04   13.08
 -10  -4  -4  364.18   13.96
   9   4   4  168.39    8.01
   9   4   4  176.35    8.32
  -9  -4  -4  170.98    8.32
   8   4   4  407.04   14.99
   8   4   4  425.04   15.61
  -8  -4  -4  428.03   15.82
   7   4   4  250.60   10.24
  -7  -4  -4  245.32   10.03
   6   4   4 1065.56   35.83
  -6  -4  -4 1131.22   37.95
   5   4   4 1315.28   43.74
  -5  -4  -4 1329.75   44.31
   4   4   4 2149.73   70.57
  -4  -4  -4 2133.19   70.16
   3   4   4   39.29    4.19
  -3  -4  -4   50.25    4.60
   2   4   4 5232.15  170.46
   1   4   4    7.65    3.52
  -1  -4  -4    9.00    3.88
   0   4   4  544.93   18.66
   0  -4  -4  594.56   20.32
  -1   4   4 2098.55   68.81
   1  -4  -4 2145.60   70.37
  -2   4   4  226.30    8.94
   2  -4  -4  242.43    9.41
  -3   4   4  162.39    7.03
   3  -4  -4  152.78    6.98
  -4   4   4 1522.60   50.31
   4  -4  -4 1674.60   55.27
  -5   4   4  280.89   10.65
   5  -4  -4  286.68   10.96
  -6   4   4   32.36    4.19
   6  -4  -4   26.73    3.98
  -7   4   4  737.78   25.08
   7  -4  -4  778.62   26.42
  -8   4   4 1564.48   51.70
   8  -4  -4 1667.36   55.06
 -10   4   4  342.31   12.72
  10  -4  -4  395.15   14.48
  10  -4  -4  416.09   15.30
 -11   4   4   42.08    4.24
  11  -4  -4   51.60    5.22
  11  -4  -4   37.95    5.22
 -12   4   4   46.01    4.91
  12  -4  -4   48.29    5.89
  12  -4  -4   50.46    5.22
 -13   4   4  502.28   17.84
  13  -4  -4  514.94   18.56
  13  -4  -4  493.80   17.73
 -14   4   4  100.09    6.05
  14  -4  -4  117.15    6.77
  14  -4  -4  103.09    6.82
 -15   4   4   93.58    6.00
  15  -4  -4   92.39    6.36
  15  -4  -4   83.96    5.95
  16  -4  -4  189.54    8.53
  16  -4  -4  170.56    7.91
  17  -4  -4  497.68   17.68
  17  -4  -4  464.33   16.34
  15   3   4   32.11    5.38
  15   3   4   35.21    4.29
  14   3   4    0.05    5.07
  14   3   4    0.47    4.08
  13   3   4    5.64    4.34
  13   3   4   -1.60    5.02
  12   3   4  165.24    7.76
  12   3   4  175.47    8.38
  11   3   4  102.99    6.31
  11   3   4  116.59    6.72
 -11  -3  -4  115.66    7.19
  10   3   4  437.96   15.98
  10   3   4  470.22   17.06
 -10  -3  -4  505.02   18.30
  -9  -3  -4  196.36    8.89
   8   3   4   29.06    5.02
   8   3   4   31.07    4.60
  -8  -3  -4   35.36    5.02
   7   3   4  504.34   17.79
   7   3   4  534.07   18.87
  -7  -3  -4  528.39   18.72
   6   3   4   -1.55    4.03
  -6  -3  -4    0.00    4.19
   5   3   4    4.50    3.52
  -5  -3  -4    7.65    3.98
   4   3   4 3972.20  129.67
  -4  -3  -4 4062.68  132.67
   2   3   4 2236.59   73.26
  -2  -3  -4 2282.61   74.81
   0   3   4  294.39   10.60
   0  -3  -4  275.46   10.08
  -1   3   4  135.41    6.00
   1  -3  -4  130.24    6.05
  -2   3   4   33.76    3.83
   2  -3  -4   35.21    3.98
  -3   3   4  395.05   14.06
   3  -3  -4  392.88   14.01
  -4   3   4  632.30   21.56
   4  -3  -4  626.10   21.46
  -5   3   4  191.50    7.81
   5  -3  -4  208.41    8.53
  -6   3   4 1935.69   63.70
   6  -3  -4 2017.90   66.38
  -7   3   4  928.55   31.23
   7  -3  -4  915.63   30.76
  -8   3   4 1468.31   48.65
   8  -3  -4 1481.24   49.06
  -9   3   4  301.93   11.48
   9  -3  -4  300.49   11.58
   9  -3  -4  297.07   11.32
 -10   3   4 2591.78   85.10
  10  -3  -4 2461.49   80.91
  10  -3  -4 2588.16   85.00
 -11   3   4  527.35   18.51
  11  -3  -4  567.68   20.01
  11  -3  -4  524.25   18.66
 -12   3   4   26.68    4.60
  12  -3  -4   35.36    5.53
  12  -3  -4   24.87    4.86
 -13   3   4   -7.19    4.34
  13  -3  -4    0.98    4.76
  13  -3  -4   10.60    5.33
 -14   3   4  590.94   20.68
  14  -3  -4  613.18   21.77
  14  -3  -4  649.88   22.65
  15  -3  -4  214.35    9.25
  15  -3  -4  220.92    9.72
  16  -3  -4   43.07    5.12
  16  -3  -4   47.41    5.27
  17  -3  -4   15.82    4.39
  17  -3  -4   25.75    5.33
  15   2   4   74.19    5.07
  15   2   4   66.13    5.84
  14   2   4   15.92    5.17
  14   2   4   17.73    4.29
  13   2   4   -1.55    5.22
  13   2   4    5.64    4.29
  12   2   4  604.39   21.04
  12   2   4  618.35   21.66
  11   2   4    9.41    4.96
  11   2   4   14.22    4.60
  10   2   4  276.96   11.22
  10   2   4  315.33   12.25
 -10  -2  -4  271.90   10.86
   9   2   4  238.65   10.03
   9   2   4  271.74   10.96
  -9  -2  -4  255.30   10.60
   8   2   4   45.14    4.70
   8   2   4   48.13    5.12
  -8  -2  -4   47.00    5.07
   7   2   4  422.04   15.10
   7   2   4  416.97   15.15
  -7  -2  -4  439.61   15.87
   6   2   4   32.11    3.98
   6   2   4   33.45    4.45
  -6  -2  -4   27.51    4.24
  -5  -2  -4  703.65   24.04
   4   2   4   62.87    4.19
  -4  -2  -4   73.31    4.81
   3   2   4    7.29    3.21
  -3  -2  -4    6.62    3.57
   2   2   4  217.66    8.22
  -2  -2  -4  203.44    7.86
   1   2   4   44.51    3.36
  -1  -2  -4   47.31    3.67
   0   2   4    3.36    2.90
   0  -2  -4    4.39    2.90
  -1   2   4  250.49    9.25
   1  -2  -4  233.90    8.69
  -2   2   4   32.88    3.83
   2  -2  -4   26.63    3.98
  -3   2   4  695.38   23.58
   3  -2  -4  795.16   26.83
  -4   2   4  136.54    6.36
   4  -2  -4  142.23    6.72
  -5   2   4  322.30   11.74
   5  -2  -4  338.13   12.41
  -6   2   4  799.82   26.99
   6  -2  -4  801.88   27.09
  -7   2   4 3992.36  130.29
   7  -2  -4 3885.86  126.87
  -8   2   4   47.15    4.60
   8  -2  -4   43.95    4.76
   8  -2  -4   53.20    4.81
  -9   2   4  190.93    7.96
   9  -2  -4  196.52    8.38
   9  -2  -4  203.65    8.63
 -11   2   4  724.33   24.76
 -12   2   4  776.55   26.57
  12  -2  -4  782.76   26.99
  12  -2  -4  804.47   27.56
 -13   2   4  371.58   13.75
  13  -2  -4  374.11   14.01
  13  -2  -4  387.45   14.68
  15  -2  -4  267.81   11.17
  15  -2  -4  265.33   10.81
  16  -2  -4  149.05    7.55
  16  -2  -4  154.90    7.39
  17  -2  -4  160.43    7.96
  17  -2  -4  185.97    7.91
  15   1   4  161.88    7.86
  15   1   4  177.49    7.76
  14   1   4    1.65    4.24
  14   1   4   -2.69    5.33
  13   1   4  112.45    6.88
  13   1   4  104.49    6.10
  12   1   4   31.18    4.65
  12   1   4   37.28    5.33
  11   1   4  218.33    9.36
  11   1   4  214.46    9.25
  10   1   4   11.68    4.76
  10   1   4    5.58    4.65
   9   1   4  185.45    8.32
   9   1   4  175.47    8.17
   8   1   4  518.56   18.30
   8   1   4  496.59   17.79
  -8  -1  -4  459.31   16.54
   7   1   4 2311.56   76.00
   7   1   4 2402.55   79.00
  -7  -1  -4 2363.78   77.81
   6   1   4   52.01    4.39
   6   1   4   45.55    4.45
  -6  -1  -4   39.19    4.39
   5   1   4   -0.72    3.41
   5   1   4    3.98    3.26
  -5  -1  -4    1.60    3.83
   4   1   4  589.39   20.16
   4   1   4  580.60   19.80
  -4  -1  -4  572.85   19.65
   3   1   4  183.80    7.29
  -3  -1  -4  193.36    7.60
   2   1   4   21.77    2.95
  -2  -1  -4   23.73    3.00
   1   1   4 1259.96   41.36
  -1  -1  -4 1330.79   43.69
   0   1   4    0.93    2.43
   0  -1  -4    1.76    2.33
  -1   1   4  701.07   23.37
   1  -1  -4  691.24   23.01
  -4   1   4   96.32    5.38
   4  -1  -4  102.52    5.53
  -5   1   4  576.47   19.80
   5  -1  -4  595.08   20.47
  -6   1   4  522.70   18.20
   6  -1  -4  536.66   18.61
   6  -1  -4  560.96   19.54
  -7   1   4  130.49    6.57
   7  -1  -4  145.49    7.19
   7  -1  -4  126.67    6.41
  -8   1   4  876.85   29.52
   8  -1  -4  858.76   28.95
   8  -1  -4  918.21   31.02
  -9   1   4   17.68    3.72
   9  -1  -4   22.54    4.08
   9  -1  -4   25.18    4.60
 -10   1   4   21.97    4.24
  10  -1  -4   19.70    4.55
  10  -1  -4   13.39    4.70
 -11   1   4  160.17    7.50
  11  -1  -4  181.73    8.53
  11  -1  -4  160.89    7.60
  12  -1  -4  125.79    6.88
  12  -1  -4  129.41    7.08
  13  -1  -4  384.19   14.68
  13  -1  -4  340.56   12.98
  14  -1  -4   14.99    5.33
  14  -1  -4   19.65    4.70
  15  -1  -4 1006.10   34.07
  15  -1  -4 1050.57   35.42
  17  -1  -4   38.57    5.43
  17  -1  -4   47.51    4.76
  15   0   4  113.38    6.82
  15   0   4  103.71    5.74
  14   0   4  286.48   10.91
  14   0   4  308.45   12.10
  13   0   4  640.06   22.33
  13   0   4  661.26   22.75
  12   0   4 1665.29   55.17
  12   0   4 1627.03   53.98
  11   0   4   92.34    5.95
  11   0   4   95.13    6.36
  10   0   4   52.22    5.07
  10   0   4   46.69    5.27
   9   0   4  550.10   19.49
   9   0   4  587.32   20.63
   8   0   4   30.30    4.45
   8   0   4   35.36    4.76
   7   0   4  778.10   26.42
   7   0   4  824.63   27.97
   5   0   4 1036.61   34.48
   5   0   4 1034.54   34.43
  -5   0  -4  974.05   32.52
   4   0   4  273.76    9.98
   4   0   4  270.66    9.87
  -4   0  -4  281.10   10.29
   2   0   4  917.70   30.30
   2   0   4  910.97   30.09
  -2   0  -4  963.19   31.80
  -2   0   4  808.09   26.78
   2   0  -4  749.67   24.87
  -5   0   4   41.41    4.29
   5   0  -4   43.84    4.39
   5   0  -4   41.36    4.50
  -6   0   4 1386.11   45.86
   6   0  -4 1390.76   46.07
   6   0  -4 1382.49   45.76
  -7   0   4  117.83    6.15
   7   0  -4  121.29    6.46
   7   0  -4  117.41    6.15
  -8   0   4  168.24    7.29
   8   0  -4  193.78    8.22
   8   0  -4  184.78    8.01
  -9   0   4    6.72    3.93
   9   0  -4    1.03    4.39
   9   0  -4    5.33    3.67
  10   0  -4   38.83    4.60
  10   0  -4   40.90    5.02
  12   0  -4 1436.77   47.93
  12   0  -4 1388.18   46.22
  13   0  -4  484.65   17.68
  13   0  -4  477.30   17.22
  14   0  -4 1195.85   40.12
  14   0  -4 1190.16   40.07
  15   0  -4  541.83   19.39
  15   0  -4  541.31   19.08
  16   0  -4  775.52   26.57
  16   0  -4  710.37   24.35
  17   0  -4  473.01   16.65
  17   0  -4  445.92   16.08
  15  -1   4  175.68    7.55
  15  -1   4  171.49    8.17
  14  -1   4    9.82    4.19
  14  -1   4   -3.10    5.17
  13  -1   4  116.48    6.36
  13  -1   4  101.02    6.57
  12  -1   4   33.92    4.76
  12  -1   4   37.12    5.33
  11  -1   4  224.18    9.62
  11  -1   4  216.47    9.31
  10  -1   4   10.55    4.91
  10  -1   4    8.53    4.50
   9  -1   4  178.06    7.96
   9  -1   4  186.90    8.48
   8  -1   4  483.56   17.11
   8  -1   4  468.93   16.75
   7  -1   4 2388.08   78.48
   7  -1   4 2439.78   80.14
   6  -1   4   50.46    4.08
   6  -1   4   38.83    4.19
   5  -1   4    6.31    3.21
   5  -1   4    5.43    3.15
   4  -1   4  574.40   19.49
   4  -1   4  565.09   19.23
   3  -1   4  180.90    6.98
   3  -1   4  180.80    6.88
   2  -1   4   20.32    2.38
   2  -1   4   19.85    2.53
   1  -1   4 1274.43   41.88
  -4  -1   4  103.51    5.48
   4   1  -4  107.80    5.64
   4   1  -4  103.45    5.43
  -5  -1   4  647.82   22.18
   5   1  -4  662.81   22.65
   5   1  -4  592.49   20.37
  -6  -1   4  503.21   17.79
   6   1  -4  576.47   19.96
   6   1  -4  527.87   18.41
  -7  -1   4  136.34    7.03
   7   1  -4  119.64    6.26
   7   1  -4  127.65    6.46
   8   1  -4  906.84   30.66
   8   1  -4  886.16   29.93
   9   1  -4   23.21    4.50
   9   1  -4   37.22    4.50
  10   1  -4   19.39    4.39
  10   1  -4   18.51    4.55
  11   1  -4  165.86    7.70
  11   1  -4  162.29    7.91
  12   1  -4  123.05    7.08
  12   1  -4  118.65    6.57
  13   1  -4  354.41   13.24
  13   1  -4  376.23   14.27
  14   1  -4   23.42    5.43
  14   1  -4   22.44    4.76
  15   1  -4  949.23   32.26
  15   1  -4  944.58   32.05
  16   1  -4  928.04   31.38
  16   1  -4  878.92   29.68
  17   1  -4   39.40    4.81
  17   1  -4   53.10    4.70
  15  -2   4   68.71    5.12
  15  -2   4   81.89    6.10
  14  -2   4   21.09    4.24
  14  -2   4    8.43    5.12
  13  -2   4    6.62    4.70
  13  -2   4    2.90    4.91
  12  -2   4  588.88   20.58
  12  -2   4  572.85   20.32
  11  -2   4    9.36    4.76
  11  -2   4   10.03    5.02
  10  -2   4  299.35   11.99
  10  -2   4  289.16   11.32
   9  -2   4  249.87   10.24
   9  -2   4  254.78   10.39
   8  -2   4   45.29    4.65
   8  -2   4   48.65    4.81
   7  -2   4  441.06   15.61
   7  -2   4  453.16   16.13
   6  -2   4   33.92    3.83
   6  -2   4   30.97    4.29
   5  -2   4  674.70   22.80
   5  -2   4  702.62   23.73
   4  -2   4   72.02    4.24
   4  -2   4   64.01    3.88
   3  -2   4    2.07    2.79
   3  -2   4    9.36    2.59
  -3   2  -4   10.91    2.59
   2  -2   4  224.59    8.12
   2  -2   4  218.23    7.81
  -2   2  -4  240.57    8.53
   1  -2   4   50.20    2.53
   1  -2   4   44.98    2.53
  -1   2  -4   45.70    2.48
   0  -2   4    4.65    1.03
   0   2  -4    6.72    1.24
  -1  -2   4  220.76    7.55
   1   2  -4  235.71    8.01
  -2  -2   4   27.51    2.79
   2   2  -4   24.56    2.53
  -3  -2   4  716.58   23.99
   3   2  -4  688.14   23.06
  -4  -2   4  148.54    6.67
   4   2  -4  135.92    6.20
   4   2  -4  126.36    5.89
  -5  -2   4  369.56   13.44
   5   2  -4  354.05   12.87
   5   2  -4  327.27   11.94
  -6  -2   4  820.50   27.87
   6   2  -4  849.97   28.69
   6   2  -4  756.90   25.70
  -7  -2   4 3885.34  126.93
   7   2  -4 4052.85  132.35
   7   2  -4 3647.52  119.17
  -8  -2   4   61.83    5.33
   8   2  -4   67.00    5.38
   8   2  -4   54.54    4.86
  -9  -2   4  194.14    8.22
   9   2  -4  217.56    8.94
   9   2  -4  196.57    8.53
 -10  -2   4  778.62   26.57
  10   2  -4  830.32   28.33
  10   2  -4  824.12   27.97
 -11  -2   4  753.80   25.85
  11   2  -4  709.34   24.40
  11   2  -4  699.52   24.14
  13   2  -4  372.87   14.17
  13   2  -4  388.74   14.27
  14   2  -4  490.08   17.53
  14   2  -4  509.77   18.35
  15   2  -4  261.66   10.50
  15   2  -4  261.14   10.70
  16   2  -4  162.03    7.76
  16   2  -4  156.03    7.24
  17   2  -4  168.91    7.91
  17   2  -4  146.42    6.67
  15  -3   4   41.88    4.45
  15  -3   4   33.45    5.22
  14  -3   4   -4.45    5.02
  14  -3   4   -6.57    4.50
  13  -3   4   -0.31    4.29
  13  -3   4    1.55    5.02
  12  -3   4  163.79    7.60
  12  -3   4  171.54    8.32
  11  -3   4  120.31    6.51
  11  -3   4  113.38    6.88
  10  -3   4  469.86   17.06
  10  -3   4  511.79   18.15
   9  -3   4  212.03    9.20
   9  -3   4  207.63    8.84
   8  -3   4   34.38    4.45
   8  -3   4   27.97    4.76
   7  -3   4  519.08   18.20
   7  -3   4  527.87   18.56
   6  -3   4    5.95    3.46
   6  -3   4    1.19    3.88
  -6   3  -4    2.33    2.95
   5  -3   4    4.55    3.21
   5  -3   4    3.57    3.31
  -5   3  -4    1.29    3.00
   0  -3   4  268.38    9.25
   0   3  -4  276.24    9.46
  -1  -3   4  111.21    4.60
   1   3  -4  118.45    4.65
  -2  -3   4   33.76    3.00
   2   3  -4   32.00    2.90
  -3  -3   4  413.82   14.37
   3   3  -4  405.85   14.11
  -4  -3   4  582.67   20.01
   4   3  -4  611.11   20.78
  -5  -3   4  213.47    8.84
   5   3  -4  177.80    7.55
  -6  -3   4 2057.19   67.73
   6   3  -4 2031.34   66.85
   6   3  -4 2039.09   67.06
  -7  -3   4 1002.48   33.71
   7   3  -4 1028.85   34.48
   7   3  -4  999.38   33.50
  -8  -3   4 1707.17   56.51
   8   3  -4 1546.90   51.29
   8   3  -4 1729.40   57.18
  -9  -3   4  289.42   11.43
   9   3  -4  292.42   11.37
   9   3  -4  309.07   11.84
 -10  -3   4 2713.79   89.18
  10   3  -4 2502.85   82.20
  10   3  -4 2308.97   76.00
 -11  -3   4  546.48   19.44
  11   3  -4  561.47   19.70
  11   3  -4  618.86   21.71
 -12  -3   4   42.60    5.43
  12   3  -4   25.59    4.65
  12   3  -4   29.42    4.91
 -13  -3   4    0.21    4.08
  13   3  -4    3.36    4.86
  13   3  -4    0.05    4.14
  14   3  -4  634.37   22.13
  14   3  -4  634.89   22.18
  15   3  -4  213.47    9.15
  15   3  -4  192.48    8.58
  16   3  -4   44.20    5.17
  16   3  -4   43.48    4.76
  17   3  -4   21.56    3.67
  17   3  -4   24.25    4.86
  15  -4   4  160.89    7.76
  15  -4   4  158.72    7.13
  14  -4   4   23.68    4.65
  14  -4   4   19.80    5.17
  13  -4   4  736.74   25.13
  13  -4   4  746.05   25.70
  12  -4   4   51.55    5.17
  12  -4   4   49.84    5.58
  11  -4   4   16.08    5.17
  11  -4   4   13.65    4.70
  10  -4   4  363.30   13.65
  10  -4   4  366.41   13.80
   9  -4   4  165.13    7.81
   9  -4   4  175.63    8.27
   8  -4   4  411.59   14.94
   8  -4   4  403.27   14.73
   7  -4   4  220.82    9.00
   7  -4   4  227.59    9.41
  -7   4  -4  225.57    8.89
   6  -4   4 1102.79   36.76
   6  -4   4 1157.07   38.52
  -6   4  -4 1055.74   35.21
   5  -4   4 1289.94   42.76
   5  -4   4 1284.26   42.55
  -5   4  -4 1294.08   42.81
   4  -4   4 2234.52   73.21
   4  -4   4 2081.49   68.25
  -4   4  -4 2218.50   72.69
   3  -4   4   42.71    3.31
  -3   4  -4   34.54    3.15
   1  -4   4   11.48    2.38
  -1   4  -4   10.96    2.59
   0  -4   4  587.32   19.65
   0   4  -4  614.73   20.58
  -2  -4   4  242.06    8.94
   2   4  -4  242.79    8.79
  -3  -4   4  160.38    6.77
   3   4  -4  155.41    6.57
  -4  -4   4 1571.71   51.86
   4   4  -4 1568.61   51.70
  -5  -4   4  324.27   12.10
   5   4  -4  284.77   10.70
  -6  -4   4   29.26    4.65
   6   4  -4   27.09    4.29
  -7  -4   4  692.80   23.89
   7   4  -4  803.44   27.30
  -8  -4   4 1798.68   59.46
   8   4  -4 1773.35   58.58
   8   4  -4 1708.21   56.46
  -9  -4   4 3627.87  118.76
   9   4  -4 3861.56  126.20
   9   4  -4 4098.35  134.01
 -10  -4   4  373.90   14.11
  10   4  -4  355.91   13.49
  10   4  -4  388.02   14.32
 -11  -4   4   49.94    5.38
  11   4  -4   39.14    5.07
  11   4  -4   47.82    4.96
 -12  -4   4   56.72    5.43
  12   4  -4   47.72    4.86
  12   4  -4   48.13    5.48
 -13  -4   4  550.62   19.75
  13   4  -4  645.23   22.70
 -14  -4   4   92.18    5.84
  14   4  -4   91.20    6.15
  14   4  -4   87.12    5.48
  15   4  -4   97.92    5.89
  15   4  -4   92.13    5.95
  16   4  -4  175.63    7.91
  16   4  -4  171.34    7.60
  15  -5   4   42.71    4.81
  15  -5   4   43.69    5.27
  14  -5   4   83.03    6.10
  14  -5   4   96.32    6.00
  13  -5   4    3.67    4.96
  13  -5   4   -1.91    4.39
  12  -5   4  135.82    7.03
  12  -5   4  116.33    6.77
  11  -5   4  215.44    9.31
  11  -5   4  204.27    9.20
  10  -5   4  245.48   10.24
  10  -5   4  263.47   10.70
   9  -5   4   39.50    5.02
   9  -5   4   49.43    5.07
  -9   5  -4   44.57    4.45
   8  -5   4  924.42   31.38
   8  -5   4  908.91   30.81
  -8   5  -4  889.78   30.04
   7  -5   4  390.45   14.22
   7  -5   4  397.79   14.58
  -7   5  -4  393.29   14.17
   6  -5   4  602.84   20.73
   6  -5   4  606.97   20.94
  -6   5  -4  614.21   21.04
   5  -5   4  943.03   31.54
  -5   5  -4  932.17   31.12
   4  -5   4  296.35   10.81
  -4   5  -4  289.58   10.55
   3  -5   4  579.57   19.65
  -3   5  -4  591.46   20.06
   2  -5   4  726.40   24.35
  -2   5  -4  691.76   23.16
   1  -5   4 1584.64   52.06
  -1   5  -4 1630.14   53.51
   0  -5   4  425.97   14.68
   0   5  -4  416.87   14.37
  -1  -5   4   34.02    3.46
   1   5  -4   32.83    3.21
  -2  -5   4  627.13   21.25
   2   5  -4  566.13   19.23
  -3  -5   4  191.40    7.81
   3   5  -4  180.13    7.39
  -4  -5   4  931.65   31.23
   4   5  -4  946.65   31.64
  -5  -5   4  115.81    6.10
   5   5  -4  120.62    6.15
  -6  -5   4 3109.31  101.85
   6   5  -4 3365.23  110.02
  -7  -5   4 2242.28   73.83
   7   5  -4 2447.01   80.34
  -8  -5   4   73.98    5.69
   8   5  -4   62.25    5.22
  -9  -5   4   78.84    5.58
   9   5  -4   73.36    4.70
   9   5  -4   69.80    5.69
 -10  -5   4  352.76   13.49
  10   5  -4  346.04   13.18
  10   5  -4  359.06   13.49
 -11  -5   4  935.79   31.90
  11   5  -4  905.29   30.81
  11   5  -4  879.44   29.99
 -12  -5   4  193.00    9.00
  12   5  -4  186.74    8.43
  12   5  -4  203.81    9.10
 -13  -5   4   14.84    4.55
  13   5  -4    7.24    4.81
  13   5  -4   13.60    4.03
 -14  -5   4  143.83    7.60
  14   5  -4  135.25    7.13
  14   5  -4  158.93    7.60
 -15  -5   4   67.73    5.79
  15   5  -4   76.98    5.89
  15   5  -4   64.88    5.17
  16   5  -4   21.20    3.83
  16   5  -4   26.37    4.81
  15  -6   4   -2.22    4.19
  15  -6   4    1.50    4.70
  14  -6   4   29.11    5.17
  14  -6   4   34.69    4.91
  13  -6   4  263.31   10.29
  13  -6   4  247.23   10.29
  12  -6   4   20.47    4.60
  12  -6   4    8.58    5.22
  11  -6   4    9.87    4.70
  11  -6   4    6.31    4.86
  10  -6   4    1.81    4.08
  10  -6   4    5.58    4.96
 -10   6  -4    4.08    4.08
   9  -6   4   22.90    4.70
   9  -6   4   27.45    5.07
  -9   6  -4   23.42    4.24
   8  -6   4  526.32   18.61
   8  -6   4  508.27   18.15
  -8   6  -4  500.67   17.63
   7  -6   4  243.36    9.82
   7  -6   4  240.00    9.82
  -7   6  -4  227.12    9.10
   6  -6   4    8.22    3.62
  -6   6  -4    9.82    3.46
   5  -6   4   40.79    3.88
  -5   6  -4   37.85    3.98
   4  -6   4  169.84    7.08
  -4   6  -4  168.39    7.03
   3  -6   4 1863.31   61.21
  -3   6  -4 1735.09   57.08
   2  -6   4  354.67   12.51
  -2   6  -4  330.11   11.79
   1  -6   4  691.76   23.32
  -1   6  -4  704.17   23.68
   0  -6   4  626.10   21.25
   0   6  -4  637.99   21.56
   1   6  -4 3684.22  120.21
  -2  -6   4   -1.09    3.77
   2   6  -4   -4.24    3.41
  -3  -6   4  298.01   11.17
   3   6  -4  285.03   10.65
  -4  -6   4  431.34   15.41
   4   6  -4  440.65   15.61
  -5  -6   4 2441.84   80.24
   5   6  -4 2510.09   82.31
  -6  -6   4 1977.05   65.25
   6   6  -4 1898.98   62.61
  -7  -6   4   10.65    4.14
   7   6  -4    6.36    4.24
  -8  -6   4  392.41   14.53
   8   6  -4  348.52   13.03
  -9  -6   4  137.42    7.13
   9   6  -4  131.89    7.13
 -10  -6   4  427.31   15.77
  10   6  -4  477.62   17.37
  10   6  -4  438.94   15.92
 -11  -6   4   62.25    5.58
  11   6  -4   52.37    5.02
  11   6  -4   71.35    5.74
 -12  -6   4   20.53    4.76
  12   6  -4   11.17    4.45
  12   6  -4   13.03    4.03
 -13  -6   4   21.15    4.60
  13   6  -4   17.11    4.76
  13   6  -4   17.94    4.45
 -14  -6   4   32.78    4.55
  14   6  -4   24.87    4.24
  14   6  -4   36.86    5.07
 -15  -6   4   24.56    5.07
  15   6  -4   17.01    4.96
  15   6  -4   13.49    4.34
 -16  -6   4   -4.08    4.45
  16   6  -4    6.36    4.14
  16   6  -4    3.10    3.72
  14  -7   4   12.87    5.43
  14  -7   4   14.94    4.19
  13  -7   4   30.19    5.22
  13  -7   4   24.61    4.60
  12  -7   4   78.33    6.46
  12  -7   4   73.42    5.58
  11  -7   4  125.22    7.19
  11  -7   4  122.58    6.67
 -11   7  -4  127.96    6.46
  10  -7   4    2.84    4.29
  10  -7   4   -1.91    4.76
 -10   7  -4   -0.10    4.03
   9  -7   4   97.82    6.05
   9  -7   4   89.49    5.84
  -9   7  -4   93.48    5.64
   8  -7   4  793.10   27.19
   8  -7   4  782.76   26.78
  -8   7  -4  745.01   25.44
   7  -7   4  372.77   13.65
   7  -7   4  361.96   13.55
  -7   7  -4  356.79   13.08
   6  -7   4    1.50    3.52
  -6   7  -4    9.41    3.52
   5  -7   4   36.81    3.77
  -5   7  -4   45.86    4.19
   4  -7   4  143.99    6.36
  -4   7  -4  118.96    5.74
   3  -7   4  576.47   19.80
  -3   7  -4  544.41   18.77
   2  -7   4 1699.42   55.99
  -2   7  -4 1805.40   59.40
   1  -7   4  113.69    5.53
  -1   7  -4  114.72    5.58
   0  -7   4  570.26   19.59
   0   7  -4  591.46   20.16
  -1  -7   4  454.14   15.92
   1   7  -4  411.80   14.53
  -2  -7   4 1767.66   58.32
   2   7  -4 1582.57   52.22
  -3  -7   4 1177.75   39.24
   3   7  -4 1120.88   37.33
  -4  -7   4  148.49    7.03
   4   7  -4  111.31    5.89
  -5  -7   4 1471.93   48.86
   5   7  -4 1577.40   52.22
  -6  -7   4  430.52   15.61
   6   7  -4  409.63   14.84
  -7  -7   4  420.64   15.41
   7   7  -4  385.69   14.22
  -8  -7   4  278.77   11.22
   8   7  -4  253.75   10.39
  -9  -7   4  383.26   14.48
   9   7  -4  380.42   14.27
 -10  -7   4  156.24    8.01
  10   7  -4  125.38    6.72
 -11  -7   4 1422.82   47.51
 -12  -7   4  302.40   12.05
  12   7  -4  306.28   11.94
  12   7  -4  287.10   11.32
 -13  -7   4  219.99    9.77
  13   7  -4  195.17    8.63
  13   7  -4  200.24    8.89
 -14  -7   4  136.03    7.29
  14   7  -4  151.48    7.29
  14   7  -4  141.35    7.19
  15   7  -4  380.00   14.06
  15   7  -4  365.68   13.39
 -16  -7   4   -0.21    4.19
  16   7  -4    6.26    4.45
  16   7  -4    3.62    3.31
  14  -8   4  214.20    9.15
  14  -8   4  235.65    9.20
  13  -8   4  301.31   11.94
  13  -8   4  285.13   10.81
  12  -8   4    7.44    3.98
  12  -8   4    0.78    5.17
 -12   8  -4    5.43    3.93
  11  -8   4   24.40    4.55
  11  -8   4   23.47    5.33
 -11   8  -4   26.68    4.50
  10  -8   4 1056.77   35.73
  10  -8   4 1006.10   33.92
 -10   8  -4 1030.92   34.59
   9  -8   4 1374.22   45.76
   9  -8   4 1383.01   46.07
  -9   8  -4 1327.69   44.26
   8  -8   4  803.95   27.45
   8  -8   4  828.25   28.28
  -8   8  -4  825.15   28.13
   7  -8   4   -3.05    4.24
  -7   8  -4    3.21    3.88
   6  -8   4  149.05    7.08
  -6   8  -4  149.21    6.77
   5  -8   4  556.30   19.49
  -5   8  -4  559.41   19.44
   4  -8   4  128.06    6.36
  -4   8  -4  109.86    5.69
   3  -8   4 1598.08   52.84
  -3   8  -4 1584.12   52.32
   2  -8   4   -3.00    3.52
  -2   8  -4   -0.16    3.41
   1  -8   4  961.12   32.21
  -1   8  -4  899.60   30.19
   0  -8   4  703.14   23.94
   0   8  -4  620.41   21.20
  -1  -8   4  353.64   12.87
   1   8  -4  340.25   12.36
  -2  -8   4    3.05    3.93
   2   8  -4    4.08    3.52
  -3  -8   4  529.42   18.51
   3   8  -4  569.23   19.70
   4   8  -4 5067.23  165.29
  -5  -8   4 1031.95   34.74
   5   8  -4  962.68   32.42
  -6  -8   4  352.81   13.29
   6   8  -4  328.04   12.36
  -7  -8   4  278.41   11.17
   7   8  -4  274.33   10.81
  -8  -8   4  388.95   14.48
   8   8  -4  427.10   15.51
  -9  -8   4  508.12   18.25
   9   8  -4  429.27   15.67
 -10  -8   4   14.99    4.86
  10   8  -4   15.82    4.91
 -11  -8   4   73.62    6.10
  11   8  -4   62.45    5.64
 -12  -8   4  524.25   18.87
  12   8  -4  547.52   19.49
  12   8  -4  599.22   21.04
 -13  -8   4 1474.52   49.12
  13   8  -4 1365.94   45.45
  13   8  -4 1332.86   44.51
 -14  -8   4  944.58   31.85
  14   8  -4 1004.04   33.66
  14   8  -4 1024.20   34.38
 -15  -8   4  220.92    9.05
  15   8  -4  219.11    9.05
  15   8  -4  212.39    8.53
  16   8  -4   16.85    4.34
  14  -9   4   -4.39    4.55
  14  -9   4   -6.93    3.98
  13  -9   4  239.94   10.08
  13  -9   4  261.61   10.19
  12  -9   4  216.42    8.89
  12  -9   4  216.06    9.41
 -12   9  -4  214.51    8.84
  11  -9   4   81.38    5.43
  11  -9   4   96.27    6.41
 -11   9  -4   92.91    5.74
  10  -9   4  186.33    8.17
  10  -9   4  174.03    8.38
 -10   9  -4  199.20    8.58
   9  -9   4   19.96    4.91
   9  -9   4   19.59    4.45
  -9   9  -4   17.89    4.34
   8  -9   4  156.34    7.60
  -8   9  -4  157.53    7.29
   7  -9   4   12.10    4.55
  -7   9  -4    4.60    3.88
   6  -9   4  185.19    8.27
  -6   9  -4  179.40    7.91
   5  -9   4  913.56   30.92
  -5   9  -4  854.62   28.90
   4  -9   4  402.44   14.68
  -4   9  -4  395.15   14.27
   3  -9   4  652.47   22.54
  -3   9  -4  630.75   21.71
   2  -9   4  597.67   20.68
  -2   9  -4  581.12   20.11
   1  -9   4  546.48   19.13
  -1   9  -4  560.96   19.39
   0  -9   4   56.35    4.76
   0   9  -4   62.77    4.55
  -1  -9   4   14.63    3.93
   1   9  -4    9.77    3.67
  -2  -9   4  839.63   28.54
   2   9  -4  813.78   27.61
  -3  -9   4   43.27    4.86
   3   9  -4   44.00    4.55
  -4  -9   4  110.02    6.10
   4   9  -4  110.43    6.10
  -5  -9   4 1226.87   41.21
   5   9  -4 1201.53   40.12
  -6  -9   4 1329.75   44.46
   6   9  -4 1517.95   50.46
  -7  -9   4  646.26   22.54
   7   9  -4  553.20   19.59
  -8  -9   4   16.23    4.81
   8   9  -4   15.25    4.65
  -9  -9   4   33.55    5.33
   9   9  -4   28.49    4.65
 -10  -9   4    0.05    5.12
  10   9  -4   -2.27    4.50
 -11  -9   4  162.44    7.91
  11   9  -4  160.43    7.76
 -12  -9   4   10.65    5.33
  12   9  -4    5.07    4.96
 -13  -9   4    3.88    4.65
  13   9  -4    4.45    4.45
  13   9  -4    5.43    4.24
 -14  -9   4    4.81    4.24
  14   9  -4    5.17    4.50
  14   9  -4    8.07    3.98
 -15  -9   4   59.51    4.76
  15   9  -4   55.32    4.39
  15   9  -4   52.22    4.96
 -13  10  -4    0.10    4.08
  12 -10   4    2.53    5.17
  12 -10   4    5.07    4.24
 -12  10  -4    1.81    4.29
  11 -10   4    5.89    5.43
  11 -10   4   -4.39    4.24
 -11  10  -4   -1.40    4.34
  10 -10   4    7.86    4.39
  10 -10   4    1.34    4.76
 -10  10  -4    4.03    4.08
   9 -10   4   31.18    4.39
   9 -10   4   20.22    5.43
  -9  10  -4   22.13    4.14
   8 -10   4    1.34    4.24
  -8  10  -4    3.21    3.93
   7 -10   4    4.65    4.60
  -7  10  -4    4.96    3.98
   6 -10   4  448.77   16.49
  -6  10  -4  382.33   13.96
   5 -10   4  103.97    6.15
  -5  10  -4  105.37    6.05
   4 -10   4    1.96    4.14
  -4  10  -4    7.65    3.88
   3 -10   4  317.65   12.10
  -3  10  -4  303.95   11.48
   2 -10   4  125.74    6.67
  -2  10  -4  125.89    6.36
   1 -10   4  369.51   13.65
  -1  10  -4  348.98   12.82
   0 -10   4  305.24   11.79
   0  10  -4  305.45   11.43
  -1 -10   4 1304.94   43.58
   1  10  -4 1127.08   37.69
  -2 -10   4   10.81    4.39
   2  10  -4   13.44    3.98
  -3 -10   4  107.80    6.36
   3  10  -4  100.71    5.84
  -4 -10   4 1010.76   34.17
   4  10  -4  767.76   26.21
  -5 -10   4   35.83    4.91
   5  10  -4   53.41    4.91
  -6 -10   4   10.91    4.29
   6  10  -4   -8.58    4.50
  -7 -10   4  195.74    8.94
   7  10  -4  184.42    8.38
  -8 -10   4  933.21   31.80
   8  10  -4  842.21   28.75
  -9 -10   4  146.06    7.65
   9  10  -4  166.43    7.91
 -10 -10   4  128.63    7.55
  10  10  -4  167.98    7.91
 -11 -10   4   49.17    5.79
  11  10  -4   36.24    5.12
 -12 -10   4    6.77    5.07
  12  10  -4   -2.33    4.76
 -13 -10   4  278.31   10.96
  13  10  -4  287.25   11.06
  13  10  -4  276.14   10.50
 -14 -10   4  169.79    7.50
  13 -11   4  144.25    6.93
  13 -11   4  153.45    6.93
 -13  11  -4  151.02    6.77
  12 -11   4  544.93   19.28
  12 -11   4  507.55   17.79
 -12  11  -4  535.11   18.51
  11 -11   4  346.50   13.24
  11 -11   4  321.32   12.05
 -11  11  -4  322.46   12.05
  10 -11   4  448.92   16.03
  10 -11   4  449.80   16.39
 -10  11  -4  422.45   15.25
   9 -11   4   63.75    5.38
  -9  11  -4   71.55    5.17
   8 -11   4   31.07    4.50
  -8  11  -4   30.14    4.45
   7 -11   4   17.58    4.55
  -7  11  -4    9.82    4.19
   6 -11   4  339.47   13.03
  -6  11  -4  323.18   12.25
   5 -11   4  122.38    6.88
  -5  11  -4  106.09    6.15
   4 -11   4   92.60    6.05
  -4  11  -4   88.51    5.48
   3 -11   4  344.69   13.18
  -3  11  -4  322.25   12.20
   2 -11   4 1474.52   49.06
  -2  11  -4 1437.81   47.82
   1 -11   4    8.17    4.70
  -1  11  -4   -0.93    3.83
   0 -11   4  128.27    7.03
   0  11  -4  108.57    5.95
  -1 -11   4   35.98    4.96
   1  11  -4   31.33    4.45
  -2 -11   4   66.64    5.58
   2  11  -4   70.47    5.17
  -3 -11   4   75.79    5.84
   3  11  -4   71.97    5.27
  -4 -11   4    4.29    4.76
   4  11  -4    2.90    4.34
  -5 -11   4  330.06   12.93
   5  11  -4  341.02   12.87
  -6 -11   4   54.49    5.84
   6  11  -4   61.73    5.33
  -7 -11   4 3263.89  107.18
   7  11  -4 2898.88   95.13
  -8 -11   4  898.57   30.81
   8  11  -4  907.35   30.81
  -9 -11   4  320.60   12.67
   9  11  -4  300.38   11.89
 -10 -11   4   77.19    6.05
  10  11  -4   77.09    5.89
 -11 -11   4  647.82   22.75
  11  11  -4  636.96   22.23
 -12 -11   4   10.19    4.29
  12  11  -4   14.58    4.70
 -13 -11   4    2.48    4.55
  13  11  -4   -2.33    4.34
 -14 -11   4  190.42    8.07
  14  11  -4  196.52    8.01
  14  11  -4  178.42    7.65
  12 -12   4   -0.10    4.50
  12 -12   4   -0.93    4.24
 -12  12  -4   -0.21    3.88
  11 -12   4   78.84    6.51
  11 -12   4   74.76    5.33
 -11  12  -4   76.47    5.17
  10 -12   4  161.00    8.01
  10 -12   4  162.39    7.39
 -10  12  -4  157.79    7.39
   9 -12   4   15.72    4.60
  -9  12  -4   13.49    4.34
   8 -12   4   22.39    4.45
  -8  12  -4   27.56    4.39
   7 -12   4  180.85    8.17
  -7  12  -4  182.97    8.17
   6 -12   4  387.91   14.32
  -6  12  -4  378.87   13.96
   5 -12   4 1090.38   36.76
  -5  12  -4 1059.87   35.67
   4 -12   4  324.89   12.67
  -4  12  -4  299.35   11.48
   3 -12   4   31.49    5.22
  -3  12  -4   34.38    4.60
   2 -12   4  609.04   21.46
  -2  12  -4  583.19   20.42
   1 -12   4  217.45    9.46
  -1  12  -4  159.50    7.55
   0 -12   4 1051.60   35.62
   0  12  -4  984.91   33.30
  -1 -12   4  544.93   19.54
   1  12  -4  470.58   16.91
  -2 -12   4  215.65    9.51
   2  12  -4  186.64    8.38
  -3 -12   4   91.05    6.41
   3  12  -4   81.69    5.64
  -4 -12   4  221.80    9.87
   4  12  -4  184.99    8.43
  -5 -12   4    2.79    4.81
   5  12  -4   -1.34    4.14
  -6 -12   4  306.33   12.15
   6  12  -4  330.89   12.62
  -7 -12   4  134.58    7.50
   7  12  -4  132.92    7.08
  -8 -12   4 1543.28   51.55
   8  12  -4 1264.61   42.39
  -9 -12   4 1197.92   40.38
   9  12  -4 1137.42   38.21
 -10 -12   4  551.65   19.70
  10  12  -4  491.57   17.73
 -11 -12   4    2.17    4.96
  11  12  -4    1.81    4.60
 -12 -12   4  238.81    9.82
  12  12  -4  287.35   11.06
 -13 -12   4   48.44    4.34
  13  12  -4   51.60    4.55
  11 -13   4    4.70    4.96
  11 -13   4   -0.26    4.50
 -11  13  -4    0.05    3.93
  10 -13   4  362.22   13.55
  10 -13   4  321.74   12.05
 -10  13  -4  308.09   11.48
   9 -13   4    9.25    4.03
  -9  13  -4   -2.27    4.34
   8 -13   4   37.85    4.76
  -8  13  -4   22.28    4.50
   7 -13   4  279.29   11.12
  -7  13  -4  274.43   10.70
   6 -13   4  615.24   21.46
  -6  13  -4  589.91   20.58
   5 -13   4  158.00    7.76
  -5  13  -4  149.05    7.19
   4 -13   4   39.14    5.12
  -4  13  -4   37.59    4.96
   3 -13   4   63.08    5.58
  -3  13  -4   63.44    5.38
   2 -13   4   50.98    5.27
  -2  13  -4   41.83    4.76
   1 -13   4    4.96    5.02
  -1  13  -4    6.88    4.19
   0 -13   4  301.83   12.15
   0  13  -4  306.12   11.84
  -1 -13   4 1303.90   43.79
   1  13  -4 1332.86   44.46
  -2 -13   4 1110.54   37.59
   2  13  -4 1195.85   40.12
  -3 -13   4   32.21    5.22
   3  13  -4   39.71    5.07
  -4 -13   4  478.49   17.53
   4  13  -4  471.82   17.01
  -5 -13   4  721.23   25.23
   5  13  -4  643.68   22.44
  -6 -13   4  153.50    7.86
   6  13  -4  127.55    6.88
  -7 -13   4   -2.43    4.96
   7  13  -4    5.64    4.60
  -8 -13   4   51.08    5.64
   8  13  -4   45.60    5.17
  -9 -13   4   -6.72    4.81
   9  13  -4    3.46    4.60
 -10 -13   4  344.74   13.03
  10  13  -4  367.60   13.75
 -11 -13   4  228.88    9.67
  11  13  -4  205.72    8.74
 -12 -13   4    8.38    4.45
  12  13  -4    3.77    4.29
  10 -14   4  150.24    7.08
 -10  14  -4  156.40    7.03
   9 -14   4   55.53    5.12
  -9  14  -4   43.53    4.50
   8 -14   4    4.91    4.65
  -8  14  -4   11.37    4.19
   7 -14   4    4.19    4.81
  -7  14  -4   -0.26    4.29
   6 -14   4   41.05    4.91
  -6  14  -4   44.26    4.70
   5 -14   4   -0.88    4.60
  -5  14  -4    0.05    4.29
   4 -14   4   -4.03    4.65
  -4  14  -4   -2.33    4.14
   3 -14   4    8.27    4.50
  -3  14  -4    8.79    4.24
   2 -14   4   14.37    5.02
  -2  14  -4   24.20    4.70
   1 -14   4   11.43    4.81
  -1  14  -4   11.94    4.45
   0 -14   4   90.32    6.20
   0  14  -4   96.16    6.15
  -1 -14   4   24.66    5.12
   1  14  -4   18.77    4.65
  -2 -14   4   21.40    5.22
   2  14  -4   22.75    4.70
  -3 -14   4   47.25    5.58
   3  14  -4   35.88    5.07
  -4 -14   4  839.11   28.90
   4  14  -4  904.77   30.81
  -5 -14   4  127.91    7.44
   5  14  -4  114.78    6.72
  -6 -14   4   58.37    5.69
   6  14  -4   51.03    5.43
  -7 -14   4   51.18    5.53
   7  14  -4   54.54    5.33
  -8 -14   4   49.37    5.43
   8  14  -4   54.44    5.33
  -9 -14   4   48.03    5.33
   9  14  -4   48.96    4.86
 -10 -14   4   14.11    4.65
  10  14  -4   11.84    4.45
 -11 -14   4    7.13    4.60
  11  14  -4   -3.10    4.24
   9 -15   4  136.18    6.77
  -9  15  -4  137.53    6.41
   8 -15   4  300.75   11.37
  -8  15  -4  292.06   11.06
   7 -15   4  460.61   16.39
  -7  15  -4  469.08   16.65
   6 -15   4  528.90   18.51
  -6  15  -4  540.79   19.08
   5 -15   4  195.84    8.63
  -5  15  -4  187.05    8.17
   4 -15   4   92.55    6.20
  -4  15  -4   82.98    5.74
   3 -15   4   13.91    4.76
  -3  15  -4   14.32    4.55
   2 -15   4   17.11    5.02
  -2  15  -4   15.87    4.55
   1 -15   4   36.60    5.12
  -1  15  -4   42.19    4.91
   0 -15   4   98.59    6.67
   0  15  -4   85.82    5.95
  -1 -15   4  688.14   23.99
   1  15  -4  617.31   21.56
  -2 -15   4  801.88   27.56
   2  15  -4  762.59   26.21
  -3 -15   4  775.52   26.78
   3  15  -4  710.37   24.56
  -4 -15   4  123.46    7.13
   4  15  -4  127.70    6.93
  -5 -15   4  609.56   21.40
   5  15  -4  653.50   22.70
  -6 -15   4    1.45    4.81
   6  15  -4   11.74    4.65
  -7 -15   4   20.11    4.81
   7  15  -4   16.23    4.65
  -8 -15   4  224.43    9.36
   8  15  -4  227.54    9.41
  -9 -15   4   37.95    5.02
   9  15  -4   34.43    4.65
 -10 -15   4  241.55    9.72
  10  15  -4  221.75    8.94
   8 -16   4   54.29    4.65
  -8  16  -4   55.22    4.55
   7 -16   4   28.49    4.45
  -7  16  -4   25.90    4.24
   6 -16   4  170.05    7.60
  -6  16  -4  184.37    8.12
   5 -16   4  152.05    7.34
  -5  16  -4  143.78    7.13
   4 -16   4  102.73    6.20
  -4  16  -4   98.85    5.95
   3 -16   4  404.72   14.99
  -3  16  -4  409.16   14.89
   2 -16   4  174.90    8.12
  -2  16  -4  173.51    7.86
   1 -16   4  390.24   14.37
  -1  16  -4  423.02   15.36
   0 -16   4  328.10   12.62
   0  16  -4  310.16   11.94
  -1 -16   4  153.86    7.76
   1  16  -4  159.34    7.70
  -2 -16   4  114.16    6.67
   2  16  -4   96.78    6.05
  -3 -16   4  189.79    8.58
   3  16  -4  179.35    8.17
  -4 -16   4 1102.79   37.07
   4  16  -4  974.57   32.88
  -5 -16   4   83.24    6.10
   5  16  -4   87.79    5.84
  -6 -16   4    4.91    4.70
   6  16  -4    2.59    4.34
  -7 -16   4   13.96    4.86
   7  16  -4    7.86    4.45
  -8 -16   4   71.86    5.48
   8  16  -4   60.28    4.96
  -9 -16   4   81.38    5.53
   9  16  -4   84.53    5.43
   6 -17   4    9.36    4.34
  -6  17  -4    3.36    3.93
   5 -17   4   55.17    4.91
  -5  17  -4   55.22    4.81
   4 -17   4   17.99    4.70
  -4  17  -4   21.51    4.60
   3 -17   4  199.62    8.79
  -3  17  -4  194.24    8.48
   2 -17   4  265.02   10.50
  -2  17  -4  273.50   10.81
   1 -17   4  322.15   12.25
  -1  17  -4  315.38   11.99
   0 -17   4    6.72    4.65
   0  17  -4    5.69    4.24
  -1 -17   4    0.88    4.65
   1  17  -4   12.87    4.45
  -2 -17   4   34.02    4.60
   2  17  -4   36.55    4.81
  -3 -17   4   54.49    5.43
   3  17  -4   55.73    4.96
  -4 -17   4   23.83    4.91
   4  17  -4   12.56    4.45
  -5 -17   4  268.17   10.50
   5  17  -4  233.48    9.46
  -6 -17   4   97.04    6.05
   6  17  -4  101.39    5.84
  -7 -17   4   26.47    4.81
   7  17  -4   15.92    4.29
   4 -18   4   28.23    4.55
  -4  18  -4   31.12    4.19
   3 -18   4   60.03    5.27
  -3  18  -4   64.52    5.17
   2 -18   4   31.33    4.65
  -2  18  -4   23.78    4.65
   1 -18   4   32.36    4.81
  -1  18  -4   41.10    4.91
   0 -18   4    8.38    4.70
   0  18  -4    4.65    4.34
  -1 -18   4   25.44    4.76
   1  18  -4   19.59    4.50
  -2 -18   4   12.20    4.70
   2  18  -4   11.17    4.29
  -3 -18   4   59.35    5.43
   3  18  -4   77.09    5.38
  -4 -18   4   31.95    5.02
   4  18  -4   27.25    3.98
   0  17   5   34.23    4.39
   0 -17  -5   36.55    4.50
  -1  17   5   10.39    3.83
   1 -17  -5   10.65    4.29
  -2  17   5  364.80   13.18
   2 -17  -5  349.03   12.72
  -3  17   5  813.26   27.35
   3 -17  -5  853.07   28.64
  -4  17   5   67.94    4.86
   4 -17  -5   82.00    5.38
  -5  17   5   -0.21    3.93
   5 -17  -5    1.03    4.03
   3  16   5   10.13    4.39
  -3 -16  -5   21.71    4.76
   2  16   5   69.07    5.27
  -2 -16  -5   67.16    5.53
   1  16   5    5.27    4.14
  -1 -16  -5   -0.41    4.65
   0  16   5   -2.22    4.14
   0 -16  -5    3.41    4.45
  -1  16   5  146.37    6.98
   1 -16  -5  159.24    7.55
  -2  16   5  124.29    6.15
   2 -16  -5  127.39    6.67
  -3  16   5   18.41    4.14
   3 -16  -5   14.58    4.55
  -4  16   5  402.91   14.37
   4 -16  -5  406.32   14.68
  -5  16   5  516.75   18.25
  -6  16   5  161.31    7.19
   6 -16  -5  136.03    6.46
  -7  16   5   17.16    3.77
   7 -16  -5   14.94    3.88
  -8  16   5   87.22    4.86
   8 -16  -5   82.05    5.02
   5  15   5   67.68    5.22
  -5 -15  -5   68.14    5.79
   4  15   5   16.18    4.50
  -4 -15  -5   10.96    4.65
   3  15   5  180.85    7.91
  -3 -15  -5  159.86    7.70
   2  15   5   11.53    4.45
  -2 -15  -5    1.40    4.70
   1  15   5    9.77    4.39
  -1 -15  -5   14.63    5.27
   0  15   5    9.62    4.34
   0 -15  -5    9.87    4.91
  -1  15   5   71.30    5.33
   1 -15  -5   74.86    5.89
  -2  15   5  389.10   14.22
   2 -15  -5  447.06   16.23
  -3  15   5  192.95    8.43
   3 -15  -5  176.35    8.12
  -4  15   5  198.53    8.53
   4 -15  -5  245.74    9.87
  -5  15   5  182.09    8.01
   5 -15  -5  171.44    7.96
  -6  15   5  109.97    6.00
   6 -15  -5   98.03    5.95
  -7  15   5   56.20    4.45
   7 -15  -5   61.32    4.96
  -8  15   5   87.63    5.17
   8 -15  -5  113.43    6.00
  -9  15   5   -1.81    3.57
   9 -15  -5    4.34    3.77
 -10  15   5   68.61    4.70
  10 -15  -5   68.81    4.76
   7  14   5  227.33    9.25
  -7 -14  -5  233.17    9.72
   6  14   5    6.00    4.34
  -6 -14  -5   18.97    5.02
   5  14   5   87.79    5.79
  -5 -14  -5   98.39    6.36
   4  14   5  650.40   22.59
  -4 -14  -5  554.75   19.65
   3  14   5   89.70    5.89
  -3 -14  -5   86.44    6.31
   2  14   5   36.35    4.96
  -2 -14  -5   27.35    4.91
   1  14   5   50.20    4.96
  -1 -14  -5   52.22    5.58
   0  14   5 1362.84   45.39
   0 -14  -5 1397.48   46.69
  -1  14   5  618.35   21.51
   1 -14  -5  604.39   21.40
  -2  14   5  123.15    6.62
   2 -14  -5  129.72    7.19
  -3  14   5  428.09   15.56
   3 -14  -5  428.19   15.82
  -4  14   5   81.89    5.74
   4 -14  -5   77.81    5.79
  -5  14   5  343.30   12.87
   5 -14  -5  372.04   13.70
  -6  14   5 1062.98   35.73
   6 -14  -5 1121.91   37.85
  -7  14   5  109.66    6.10
   7 -14  -5   90.94    5.84
  -8  14   5    9.20    3.98
   8 -14  -5    6.88    4.24
  -9  14   5  661.26   22.54
   9 -14  -5  686.59   23.47
 -10  14   5  410.87   14.63
  10 -14  -5  420.02   14.94
 -11  14   5    6.26    3.62
  11 -14  -5   11.99    3.72
   8  13   5   69.74    5.74
  -8 -13  -5   91.30    6.10
   7  13   5  343.24   12.93
  -7 -13  -5  393.65   14.58
   6  13   5  362.84   13.55
  -6 -13  -5  340.92   13.08
   5  13   5  534.07   18.92
  -5 -13  -5  521.15   18.66
   4  13   5   11.37    4.45
  -4 -13  -5    3.46    4.81
   3  13   5  632.82   22.08
  -3 -13  -5  615.76   21.61
   2  13   5  437.08   15.92
  -2 -13  -5  428.65   15.92
   1  13   5  710.89   24.56
  -1 -13  -5  652.99   22.85
   0  13   5  305.76   11.99
   0 -13  -5  311.65   12.25
  -1  13   5  109.45    6.51
   1 -13  -5  103.51    6.72
  -2  13   5  303.18   11.84
   2 -13  -5  354.41   13.49
  -3  13   5  277.95   11.06
   3 -13  -5  323.18   12.56
  -4  13   5   53.67    5.07
   4 -13  -5   49.53    5.33
  -5  13   5  435.07   15.87
   5 -13  -5  416.81   15.41
  -6  13   5  154.33    7.44
   6 -13  -5  146.62    7.34
  -7  13   5 2176.62   71.71
   7 -13  -5 1867.45   61.73
  -8  13   5  335.18   12.72
   8 -13  -5  358.81   13.44
  -9  13   5  299.25   11.58
   9 -13  -5  308.91   11.68
 -10  13   5   35.88    4.45
  10 -13  -5   45.34    4.91
 -11  13   5  190.26    8.01
  11 -13  -5  172.37    7.70
 -12  13   5  304.99   11.32
  12 -13  -5  295.78   11.01
   9  12   5   33.45    5.02
  -9 -12  -5   24.87    5.27
   8  12   5   18.04    5.02
  -8 -12  -5   18.15    4.91
   7  12   5   21.35    4.65
  -7 -12  -5   29.99    5.33
   6  12   5  121.96    6.62
  -6 -12  -5  135.15    7.39
   5  12   5   84.63    6.10
  -5 -12  -5   81.02    6.15
   4  12   5  121.39    6.88
  -4 -12  -5  126.87    7.24
   3  12   5  156.14    7.86
  -3 -12  -5  168.03    8.12
   2  12   5   13.65    4.70
  -2 -12  -5    3.05    4.70
   1  12   5  241.55   10.13
  -1 -12  -5  243.15   10.24
   0  12   5    0.78    4.70
   0 -12  -5    5.84    5.07
  -1  12   5  115.76    6.67
   1 -12  -5  136.23    7.60
  -2  12   5   -6.57    4.60
   2 -12  -5   -5.33    4.39
  -3  12   5  808.09   27.66
   3 -12  -5  882.02   30.14
  -4  12   5  286.89   11.32
   4 -12  -5  280.94   11.12
  -5  12   5  334.35   12.77
   5 -12  -5  345.78   13.08
  -6  12   5  834.97   28.49
   6 -12  -5  775.52   26.57
  -7  12   5   38.16    5.07
   7 -12  -5   48.44    5.22
  -8  12   5 1002.48   33.76
   8 -12  -5  954.92   32.31
  -9  12   5  475.65   17.06
   9 -12  -5  495.76   17.79
 -10  12   5  254.94   10.24
  10 -12  -5  256.33   10.29
 -11  12   5  329.03   12.30
  11 -12  -5  319.98   12.05
 -12  12   5    3.72    3.83
  12 -12  -5   12.67    4.29
 -13  12   5  108.57    5.79
  13 -12  -5   99.73    5.69
  10  11   5  166.63    8.01
 -10 -11  -5  156.96    7.76
   9  11   5    5.58    5.02
  -9 -11  -5    8.89    5.12
   8  11   5   37.02    5.17
  -8 -11  -5   34.74    5.33
   7  11   5  119.64    6.57
  -7 -11  -5  106.14    6.72
   6  11   5  144.40    7.34
  -6 -11  -5  168.24    8.22
   5  11   5   -1.19    4.81
  -5 -11  -5   -7.86    4.91
   4  11   5  327.63   12.67
  -4 -11  -5  350.74   13.55
   3  11   5  658.67   22.96
  -3 -11  -5  749.67   25.95
   2  11   5 1253.24   42.08
  -2 -11  -5 1293.05   43.38
   1  11   5  832.91   28.54
  -1 -11  -5  981.80   33.40
   0  11   5  228.52    9.62
   0 -11  -5  226.35   10.03
  -1  11   5   85.57    5.84
   1 -11  -5   89.65    6.36
  -2  11   5  182.09    8.17
   2 -11  -5  172.99    8.43
  -3  11   5  163.69    7.76
   3 -11  -5  186.95    8.58
  -4  11   5  173.82    8.07
   4 -11  -5  183.33    8.43
  -5  11   5 1748.53   57.96
   5 -11  -5 1909.84   63.13
  -6  11   5  532.52   18.92
   6 -11  -5  472.08   17.01
  -7  11   5  199.31    8.74
   7 -11  -5  192.74    8.43
  -8  11   5 1363.36   45.65
   8 -11  -5 1411.44   47.15
  -9  11   5  981.29   33.14
   9 -11  -5 1022.13   34.48
 -10  11   5    4.76    4.29
  10 -11  -5    2.17    4.55
 -11  11   5   18.35    4.39
  11 -11  -5   21.15    4.60
 -12  11   5  129.41    6.51
  12 -11  -5  136.96    6.72
 -13  11   5   -4.65    3.93
  13 -11  -5   -1.55    4.14
 -14  11   5   28.64    4.08
  14 -11  -5   33.04    4.39
  11  10   5  252.97   10.29
 -11 -10  -5  274.79   11.12
  10  10   5   20.94    4.91
 -10 -10  -5   18.97    5.33
   9  10   5  258.40   10.55
  -9 -10  -5  255.71   10.60
   8  10   5  285.39   11.37
  -8 -10  -5  292.99   11.89
   7  10   5   -3.36    4.81
  -7 -10  -5    0.98    4.86
   6  10   5   74.50    5.84
  -6 -10  -5   74.09    6.05
   5  10   5  648.33   22.70
  -5 -10  -5  682.46   23.83
   4  10   5 2740.16   90.06
  -4 -10  -5 2530.77   83.39
   3  10   5 1619.28   53.82
  -3 -10  -5 1642.55   54.65
   2  10   5  112.14    6.62
  -2 -10  -5  118.55    6.88
   1  10   5   76.47    5.58
  -1 -10  -5  100.30    6.57
   0  10   5  389.31   14.42
   0 -10  -5  418.37   15.41
  -1  10   5  271.12   10.65
   1 -10  -5  319.87   12.36
  -2  10   5 1538.11   51.03
   2 -10  -5 1569.13   52.17
  -3  10   5   18.25    4.50
   3 -10  -5   14.27    4.50
  -4  10   5   78.95    5.53
   4 -10  -5   77.29    5.89
  -5  10   5  534.59   18.82
   5 -10  -5  503.57   18.04
  -6  10   5   68.50    5.27
   6 -10  -5   74.76    5.74
  -7  10   5  119.84    6.57
   7 -10  -5  124.65    6.88
  -8  10   5  719.16   24.76
   8 -10  -5  716.58   24.71
  -9  10   5 2377.74   78.17
   9 -10  -5 2356.54   77.55
 -10  10   5 1541.21   51.13
  10 -10  -5 1460.56   48.60
 -11  10   5 1094.51   36.76
  11 -10  -5 1043.85   35.16
 -12  10   5   -2.12    4.39
  12 -10  -5    9.25    4.39
 -13  10   5  536.66   18.87
  13 -10  -5  547.00   19.13
 -14  10   5   38.78    4.55
  14 -10  -5   38.16    4.45
 -15  10   5  173.92    7.34
  15 -10  -5  172.42    7.29
  15 -10  -5  180.64    8.22
  12   9   5    3.00    3.98
  12   9   5    0.78    4.65
  11   9   5   96.53    6.41
  11   9   5  106.25    6.10
 -11  -9  -5  108.99    6.67
  10   9   5   84.58    6.15
 -10  -9  -5  101.90    6.67
   9   9   5   51.86    5.33
  -9  -9  -5   39.86    5.12
   8   9   5  378.50   14.17
  -8  -9  -5  405.80   15.30
   7   9   5 1068.66   36.04
  -7  -9  -5 1041.78   35.31
   6   9   5  207.53    9.20
  -6  -9  -5  221.95    9.72
   5   9   5 2343.61   77.24
  -5  -9  -5 2301.73   76.00
   4   9   5 1083.66   36.50
  -4  -9  -5 1008.17   34.17
   3   9   5  207.22    9.10
  -3  -9  -5  204.84    9.15
   2   9   5  302.71   11.89
  -2  -9  -5  278.72   11.01
   1   9   5  313.41   12.20
  -1  -9  -5  346.35   13.24
   0   9   5  212.96    9.00
   0  -9  -5  243.36   10.19
  -1   9   5  446.85   16.08
   1  -9  -5  524.25   18.61
  -2   9   5  893.91   30.30
   2  -9  -5  864.96   29.42
  -3   9   5  966.81   32.62
   3  -9  -5 1069.18   35.98
  -4   9   5  495.30   17.58
   4  -9  -5  531.49   18.82
  -5   9   5  981.29   33.14
   5  -9  -5 1046.43   35.31
  -6   9   5  338.07   12.82
   6  -9  -5  329.23   12.51
  -7   9   5 1293.56   43.17
   7  -9  -5 1113.64   37.48
  -8   9   5   25.64    4.65
   8  -9  -5   25.02    4.55
 -10   9   5  788.96   26.88
  10  -9  -5  819.98   27.92
 -11   9   5 1920.18   63.39
  11  -9  -5 1894.33   62.56
 -12   9   5 1566.03   52.01
  12  -9  -5 1574.82   52.27
 -13   9   5  457.61   16.54
  13  -9  -5  476.32   16.91
 -14   9   5   27.30    4.50
  14  -9  -5   36.45    4.60
 -15   9   5   11.68    3.62
  15  -9  -5    9.67    4.86
  15  -9  -5   13.75    4.19
  12   8   5   18.92    4.24
  12   8   5   11.22    4.81
 -12  -8  -5   23.89    5.12
  11   8   5   -7.03    5.02
  11   8   5    0.47    4.14
 -11  -8  -5    6.10    5.22
  10   8   5   31.02    5.22
  10   8   5   45.70    4.70
 -10  -8  -5   30.45    5.38
   9   8   5  133.54    7.19
  -9  -8  -5  139.64    7.55
   8   8   5  244.96   10.24
  -8  -8  -5  252.82   10.65
   7   8   5   23.99    5.02
  -7  -8  -5   19.75    4.70
   6   8   5   -3.31    4.70
  -6  -8  -5    4.14    4.86
   5   8   5  540.79   19.18
  -5  -8  -5  557.34   19.85
   4   8   5  501.19   17.99
  -4  -8  -5  489.76   17.73
   3   8   5   67.68    5.38
  -3  -8  -5   68.56    5.53
   2   8   5  154.48    7.44
  -2  -8  -5  142.33    7.24
   1   8   5   98.54    5.84
  -1  -8  -5  100.87    6.15
   0   8   5  144.04    6.98
   0  -8  -5  141.56    7.08
  -1   8   5  169.37    7.50
   1  -8  -5  173.66    7.91
  -2   8   5    8.27    4.03
   2  -8  -5   11.79    4.29
  -3   8   5  135.51    6.62
   3  -8  -5  131.37    6.72
  -4   8   5  259.85   10.08
   4  -8  -5  257.58   10.24
  -5   8   5  612.66   21.30
   5  -8  -5  561.99   19.65
  -6   8   5  160.12    7.34
   6  -8  -5  185.30    8.07
  -7   8   5  263.11   10.60
   7  -8  -5  253.34   10.29
  -8   8   5   -2.43    4.34
   8  -8  -5    5.07    3.93
  -9   8   5   29.52    4.70
   9  -8  -5   24.30    4.45
 -10   8   5   26.37    4.65
  10  -8  -5   26.83    4.76
 -11   8   5   20.73    4.50
  11  -8  -5   29.47    4.81
 -12   8   5   28.59    4.70
  12  -8  -5   26.06    4.39
 -13   8   5  683.49   23.68
  13  -8  -5  646.78   22.49
 -14   8   5   -0.21    4.34
  14  -8  -5   -2.33    4.50
  14  -8  -5    0.16    5.12
 -15   8   5   50.15    4.65
  15  -8  -5   53.67    5.27
  15  -8  -5   38.21    4.70
 -16   8   5  139.44    6.72
  16  -8  -5  146.11    6.82
  16  -8  -5  137.68    7.34
  13   7   5    7.44    4.55
  13   7   5    2.02    3.83
 -13  -7  -5   -6.51    4.81
  12   7   5   30.30    4.45
  12   7   5   29.06    4.96
 -12  -7  -5   38.31    5.38
  11   7   5    8.63    4.14
  11   7   5    8.17    4.86
 -11  -7  -5    3.36    5.22
  10   7   5    7.60    4.70
  10   7   5    0.21    4.45
 -10  -7  -5   -4.03    5.02
   9   7   5   53.10    5.48
  -9  -7  -5   48.13    5.79
   8   7   5    0.00    4.86
  -8  -7  -5    8.69    5.07
   7   7   5 1219.63   40.95
  -7  -7  -5 1339.06   44.93
   6   7   5 2030.82   67.06
  -6  -7  -5 2132.67   70.47
   5   7   5  248.84   10.24
  -5  -7  -5  249.41   10.29
   4   7   5   13.13    4.65
  -4  -7  -5    6.72    4.39
   3   7   5  141.97    7.13
  -3  -7  -5  129.92    6.82
   2   7   5  176.97    7.76
  -2  -7  -5  204.17    8.63
   1   7   5  245.68    9.56
  -1  -7  -5  244.08    9.82
   0   7   5   21.71    4.19
   0  -7  -5   41.52    4.81
  -1   7   5  489.25   17.11
   1  -7  -5  503.10   17.79
  -2   7   5  624.55   21.46
   2  -7  -5  707.27   24.20
  -3   7   5   44.10    4.50
   3  -7  -5   44.57    4.45
  -4   7   5  301.52   11.48
   4  -7  -5  294.59   11.27
  -5   7   5  410.77   14.68
   5  -7  -5  429.07   15.46
  -6   7   5   -0.05    3.77
   6  -7  -5   -2.27    4.14
  -7   7   5  842.73   28.59
   7  -7  -5  823.60   27.92
  -8   7   5   68.14    5.22
   8  -7  -5   67.68    5.38
  -9   7   5   17.47    4.39
   9  -7  -5   23.11    4.76
 -11   7   5 1710.79   56.61
  11  -7  -5 1712.34   56.77
 -12   7   5  552.17   19.39
  12  -7  -5  612.14   21.46
 -13   7   5 1597.05   52.89
  13  -7  -5 1670.46   55.48
  13  -7  -5 1673.05   55.48
 -14   7   5  436.25   15.82
 -15   7   5  346.91   12.82
  15  -7  -5  347.28   12.93
  15  -7  -5  311.86   12.10
 -16   7   5   29.83    4.24
  16  -7  -5   27.51    5.22
  16  -7  -5   37.85    4.45
  13   6   5   57.28    4.76
  13   6   5   50.67    5.22
 -13  -6  -5   52.37    5.48
  12   6   5   33.55    4.96
  12   6   5   30.50    4.76
 -12  -6  -5   38.21    5.43
  11   6   5    7.60    4.39
  11   6   5   10.75    4.81
 -11  -6  -5    3.98    4.86
  10   6   5  343.09   12.93
  10   6   5  355.70   13.44
 -10  -6  -5  328.77   12.87
   9   6   5  760.01   26.16
   9   6   5  801.37   27.45
  -9  -6  -5  811.19   27.97
   8   6   5 1509.16   50.31
  -8  -6  -5 1663.74   55.42
   7   6   5 1094.00   36.81
  -7  -6  -5 1120.36   37.85
   6   6   5   73.36    5.79
  -6  -6  -5   80.65    6.15
   5   6   5  285.91   11.22
  -5  -6  -5  298.47   11.58
   4   6   5  994.73   33.55
  -4  -6  -5 1030.40   34.69
   3   6   5 2264.51   74.45
  -3  -6  -5 2547.31   83.65
   2   6   5 1200.50   39.96
  -2  -6  -5 1213.94   40.48
   1   6   5  126.77    6.20
  -1  -6  -5  153.60    7.13
   0   6   5 2220.05   72.95
   0  -6  -5 2258.82   74.19
  -1   6   5  386.10   13.91
   1  -6  -5  334.97   12.30
  -2   6   5   79.00    5.17
   2  -6  -5   82.62    5.12
  -3   6   5  109.40    5.74
   3  -6  -5  106.14    5.79
  -4   6   5   15.36    4.19
   4  -6  -5   10.65    4.08
  -5   6   5 1935.69   63.75
   5  -6  -5 2195.75   72.23
  -6   6   5 2508.54   82.26
   6  -6  -5 2341.54   76.98
  -7   6   5  619.38   21.25
   7  -6  -5  581.64   20.27
  -8   6   5  804.99   27.40
   8  -6  -5  930.10   31.59
  -9   6   5 1723.72   57.08
   9  -6  -5 1795.06   59.40
 -10   6   5  273.24   10.65
  10  -6  -5  295.89   11.68
 -11   6   5  185.71    8.22
  11  -6  -5  191.71    8.74
 -12   6   5  113.48    6.15
  12  -6  -5  111.98    6.62
 -13   6   5 1825.57   60.34
  13  -6  -5 1850.90   61.21
  13  -6  -5 1785.24   59.20
 -14   6   5 2174.03   71.66
  14  -6  -5 2160.07   71.24
  14  -6  -5 2047.36   67.68
 -15   6   5  877.37   29.68
  15  -6  -5  918.21   31.12
  15  -6  -5  867.03   29.37
 -16   6   5    2.79    3.93
  16  -6  -5    5.22    4.65
  16  -6  -5    6.51    4.24
 -17   6   5   11.01    3.88
  17  -6  -5    7.03    4.24
  17  -6  -5    8.48    4.14
  13   5   5   10.03    4.65
  13   5   5    9.72    4.14
 -13  -5  -5   12.20    4.03
  12   5   5  206.96    8.84
  12   5   5  216.16    9.36
 -12  -5  -5  200.55    9.20
  11   5   5  333.58   12.87
  11   5   5  355.86   13.34
 -11  -5  -5  344.54   13.44
  10   5   5  487.96   17.42
  10   5   5  480.20   17.22
 -10  -5  -5  486.25   17.79
   9   5   5  695.90   24.14
   9   5   5  746.05   25.64
  -9  -5  -5  748.12   25.95
   8   5   5    6.98    4.39
   8   5   5    5.48    4.29
  -8  -5  -5   -0.83    4.70
   7   5   5  116.74    6.67
  -7  -5  -5  117.57    6.77
   6   5   5  225.42    9.51
  -6  -5  -5  230.38    9.72
   5   5   5   82.10    5.64
  -5  -5  -5   82.52    5.53
   4   5   5 1589.29   52.63
  -4  -5  -5 1703.55   56.41
   3   5   5 3250.97  106.30
  -3  -5  -5 3192.55  104.49
   2   5   5 3275.78  107.07
  -2  -5  -5 3230.29  105.68
   1   5   5 2293.98   75.28
  -1  -5  -5 2420.65   79.36
   0   5   5 1636.86   53.98
   0  -5  -5 1577.40   52.11
  -1   5   5  358.13   12.98
   1  -5  -5  336.16   12.30
  -2   5   5 1364.39   45.24
   2  -5  -5 1389.73   46.07
  -3   5   5  182.19    7.81
   3  -5  -5  172.11    7.44
  -4   5   5  852.03   28.80
   4  -5  -5  838.08   28.33
  -5   5   5   82.88    4.96
   5  -5  -5   73.42    4.96
  -6   5   5 2546.28   83.50
   6  -5  -5 2729.82   89.49
  -8   5   5 2737.58   89.75
   8  -5  -5 2639.34   86.60
  -9   5   5  183.59    8.01
   9  -5  -5  200.60    8.79
 -10   5   5   24.20    4.65
  10  -5  -5   28.33    4.86
 -12   5   5  678.84   23.47
  12  -5  -5  761.56   26.37
  12  -5  -5  755.87   25.95
 -13   5   5   78.84    5.27
  13  -5  -5   75.12    6.15
  13  -5  -5   78.95    5.89
 -14   5   5  380.00   14.11
  14  -5  -5  391.07   14.84
  14  -5  -5  381.45   14.17
 -15   5   5  237.00    9.87
  15  -5  -5  283.27   11.48
  15  -5  -5  269.98   10.70
 -16   5   5  221.07    9.10
  16  -5  -5  239.53    9.82
  16  -5  -5  236.02    9.93
 -17   5   5  204.79    8.38
  17  -5  -5  227.74    9.72
  17  -5  -5  215.03    8.58
  14   4   5  147.09    6.93
  14   4   5  162.39    7.86
  13   4   5   93.84    6.36
  13   4   5   99.83    5.74
  12   4   5    6.41    5.22
  12   4   5   -0.67    4.19
 -12  -4  -5    1.14    4.50
  11   4   5   11.89    4.45
  11   4   5   14.58    4.96
 -11  -4  -5   27.76    5.43
  10   4   5   70.83    5.84
  10   4   5   77.24    5.53
 -10  -4  -5   63.70    6.05
   9   4   5  348.10   13.24
   9   4   5  336.11   12.87
  -9  -4  -5  326.23   12.72
   8   4   5   55.99    5.17
   8   4   5   51.49    5.12
  -8  -4  -5   61.42    5.53
   7   4   5  215.34    9.31
   7   4   5  190.21    8.12
  -7  -4  -5  213.78    9.36
   6   4   5    1.76    4.24
  -6  -4  -5    6.82    4.24
   5   4   5  175.27    7.65
  -5  -4  -5  170.51    7.76
   4   4   5  494.47   17.32
  -4  -4  -5  502.07   17.63
   3   4   5    4.81    3.46
  -3  -4  -5    0.88    3.67
   2   4   5  223.76    8.69
  -2  -4  -5  214.09    8.53
   1   4   5  582.67   19.90
  -1  -4  -5  598.70   20.53
   0   4   5    5.02    3.36
   0  -4  -5   10.44    3.62
  -1   4   5 2085.62   68.40
   1  -4  -5 1918.11   62.97
  -2   4   5  622.48   21.15
   2  -4  -5  627.13   21.35
  -3   4   5 2672.43   87.43
   3  -4  -5 2617.11   85.67
  -4   4   5  124.50    6.15
   4  -4  -5  132.10    6.36
  -5   4   5  686.07   23.42
   5  -4  -5  703.65   23.99
  -6   4   5 3544.11  115.81
   6  -4  -5 3305.25  108.11
  -7   4   5  105.01    5.95
   7  -4  -5  120.72    6.46
  -8   4   5  166.27    7.44
   8  -4  -5  200.65    8.53
  -9   4   5  110.02    6.05
   9  -4  -5  106.92    6.10
 -10   4   5  151.64    7.39
  10  -4  -5  159.60    7.60
 -11   4   5   78.07    5.48
  11  -4  -5   89.86    5.84
  11  -4  -5   91.30    6.36
 -12   4   5   10.39    3.93
  12  -4  -5   17.94    5.02
  12  -4  -5   11.01    4.60
 -13   4   5   13.08    4.34
  13  -4  -5    5.89    5.22
  13  -4  -5    8.01    4.34
 -14   4   5  259.07   10.44
  14  -4  -5  241.96    9.82
  14  -4  -5  278.77   11.48
 -15   4   5   48.13    5.12
  15  -4  -5   65.35    5.48
  15  -4  -5   59.51    5.95
 -16   4   5   10.34    4.19
  16  -4  -5    0.62    4.86
  16  -4  -5    7.29    4.45
  17  -4  -5  112.50    6.57
  17  -4  -5  103.76    5.84
  14   3   5  126.93    7.08
  14   3   5  121.70    6.26
  13   3   5   11.01    5.33
  13   3   5   10.81    4.34
  12   3   5    8.48    4.29
  12   3   5    9.77    4.91
  11   3   5  358.65   13.34
  11   3   5  357.10   13.55
  10   3   5 1845.21   61.06
  10   3   5 1888.64   62.45
 -10  -3  -5 1713.38   56.97
   9   3   5  665.91   23.32
   9   3   5  684.52   23.68
  -9  -3  -5  662.81   23.16
   8   3   5  482.58   17.32
   8   3   5  500.62   17.89
  -8  -3  -5  531.49   18.97
   7   3   5   16.03    4.45
   7   3   5   13.86    4.24
  -7  -3  -5   18.61    4.60
   6   3   5   94.66    5.43
   6   3   5   87.74    5.74
  -6  -3  -5   83.55    5.58
   5   3   5 1539.66   50.93
  -5  -3  -5 1651.33   54.70
   4   3   5   60.18    4.34
  -4  -3  -5   68.25    4.70
   3   3   5  316.82   11.48
  -3  -3  -5  330.47   12.10
   2   3   5 1240.83   41.05
  -2  -3  -5 1245.48   41.21
   1   3   5 1329.24   43.84
  -1  -3  -5 1364.91   45.03
   0   3   5 2790.83   91.15
   0  -3  -5 2558.69   83.70
  -1   3   5  219.83    8.27
   1  -3  -5  217.45    8.32
  -2   3   5  155.21    6.46
   2  -3  -5  145.38    6.31
  -3   3   5   34.38    3.72
   3  -3  -5   29.06    3.72
  -4   3   5 1221.18   40.43
   4  -3  -5 1222.21   40.53
  -5   3   5  706.24   23.99
   5  -3  -5  766.21   25.95
  -6   3   5  617.83   21.25
   6  -3  -5  630.24   21.66
  -7   3   5 2574.72   84.43
   7  -3  -5 2610.91   85.57
  -8   3   5  555.79   19.28
   8  -3  -5  557.86   19.39
  -9   3   5  237.98    9.51
   9  -3  -5  267.24   10.44
 -10   3   5  205.82    8.69
  10  -3  -5  222.26    9.51
  10  -3  -5  221.18    9.31
 -11   3   5   14.01    4.29
  11  -3  -5   14.63    4.86
  11  -3  -5    4.34    4.50
  12  -3  -5  953.37   32.68
 -13   3   5  209.80    8.84
  13  -3  -5  234.93    9.87
  13  -3  -5  245.48   10.13
 -14   3   5  914.08   30.97
  14  -3  -5  848.93   28.95
  14  -3  -5  842.21   28.90
 -15   3   5  635.41   22.13
  15  -3  -5  606.97   21.35
  15  -3  -5  665.91   23.11
  17  -3  -5 1410.92   46.79
  17  -3  -5 1388.18   45.91
  14   2   5  430.72   15.61
  14   2   5  421.67   14.99
  13   2   5  286.48   11.01
  13   2   5  284.41   11.27
  12   2   5  164.25    8.12
  12   2   5  165.60    7.70
  11   2   5  590.43   20.68
  11   2   5  578.54   20.47
  10   2   5  148.02    7.44
  10   2   5  155.31    7.65
   9   2   5  510.08   18.30
   9   2   5  494.47   17.68
  -9  -2  -5  449.39   16.49
   8   2   5  335.59   12.62
   8   2   5  360.93   13.55
  -8  -2  -5  366.92   13.80
   7   2   5   54.03    4.91
   7   2   5   46.27    4.65
  -7  -2  -5   47.51    4.96
   6   2   5   13.49    3.83
   6   2   5   16.91    4.24
  -6  -2  -5   13.29    3.98
   5   2   5  154.95    6.93
   5   2   5  165.39    7.34
  -5  -2  -5  169.17    7.34
   4   2   5 1370.08   45.29
  -4  -2  -5 1434.71   47.41
   3   2   5    7.81    2.90
  -3  -2  -5   10.55    3.52
   2   2   5 1478.14   48.65
  -2  -2  -5 1428.50   47.05
   1   2   5   14.63    2.90
  -1  -2  -5    8.43    2.74
  -2   2   5 3444.33  112.35
  -3   2   5 2827.54   92.34
   3  -2  -5 2725.68   89.08
  -6   2   5 2702.94   88.56
   6  -2  -5 2564.89   84.07
  -7   2   5   16.18    4.19
   7  -2  -5   21.46    4.08
  -8   2   5  452.95   16.08
   8  -2  -5  470.74   16.80
   8  -2  -5  460.09   16.39
  -9   2   5 1163.79   38.78
   9  -2  -5 1260.47   42.14
   9  -2  -5 1307.52   43.58
 -10   2   5 1461.07   48.50
  10  -2  -5 1445.56   48.08
  10  -2  -5 1533.97   50.87
 -11   2   5  563.03   19.65
  11  -2  -5  583.19   20.42
  11  -2  -5  524.77   18.72
 -12   2   5    2.12    3.98
  12  -2  -5    8.27    4.76
  12  -2  -5   11.27    4.65
 -13   2   5  700.55   24.20
  13  -2  -5  746.56   25.85
  13  -2  -5  723.30   24.87
  14  -2  -5  609.56   21.46
  14  -2  -5  645.23   22.80
  15  -2  -5   90.53    6.31
  15  -2  -5  103.09    6.46
  16  -2  -5   79.10    6.20
  16  -2  -5   73.73    5.43
  17  -2  -5  585.77   20.16
  17  -2  -5  660.22   22.75
  15   1   5  162.03    7.03
  15   1   5  146.21    7.13
  14   1   5  168.60    7.50
  14   1   5  155.31    7.76
  13   1   5  294.70   11.37
  13   1   5  280.89   11.27
  12   1   5  257.37   10.55
  12   1   5  238.39    9.67
  11   1   5   64.68    5.69
  11   1   5   75.12    5.43
  10   1   5   36.14    4.96
  10   1   5   43.38    4.91
   9   1   5   21.82    4.86
   9   1   5   23.06    4.50
   8   1   5  155.47    7.34
   8   1   5  151.12    7.13
   7   1   5  377.88   13.75
   7   1   5  394.74   14.42
  -7  -1  -5  375.20   13.80
   6   1   5 2037.54   67.00
   6   1   5 1927.94   63.49
  -6  -1  -5 2060.81   67.88
   5   1   5 1344.75   44.57
   5   1   5 1381.97   45.70
  -5  -1  -5 1368.01   45.39
   4   1   5   93.22    4.60
   4   1   5   91.15    4.60
  -4  -1  -5  111.05    5.43
  -3  -1  -5 1944.48   63.80
   2   1   5   45.08    3.15
  -2  -1  -5   45.24    3.36
   1   1   5   11.43    2.48
  -1  -1  -5   16.08    2.59
   0   1   5  334.87   11.48
   0  -1  -5  328.56   11.22
   1  -1  -5 1289.43   42.29
  -5   1   5  509.77   17.63
   5  -1  -5  533.56   18.35
  -6   1   5  552.17   19.08
   6  -1  -5  533.04   18.56
   6  -1  -5  541.83   18.82
  -7   1   5   57.85    4.50
   7  -1  -5   47.20    4.45
   7  -1  -5   56.87    4.70
  -8   1   5  272.15   10.60
   8  -1  -5  322.82   12.36
   8  -1  -5  287.98   10.96
  -9   1   5  161.46    7.39
   9  -1  -5  165.91    7.81
   9  -1  -5  161.05    7.55
 -10   1   5  710.37   24.40
 -11   1   5 1247.03   41.67
  11  -1  -5 1324.07   44.20
  11  -1  -5 1177.23   39.50
 -12   1   5  326.96   12.51
  13  -1  -5  185.40    8.48
  13  -1  -5  164.56    8.01
  14  -1  -5  230.79   10.03
  14  -1  -5  197.14    8.84
  15  -1  -5  207.06    9.36
  15  -1  -5  212.60    9.25
  16  -1  -5  421.36   15.46
  16  -1  -5  441.17   15.92
  17  -1  -5  272.98   10.75
  17  -1  -5  282.55   10.70
  18  -1  -5    0.10    4.08
  15   0   5    1.60    4.60
  15   0   5   -5.89    4.14
  14   0   5   -2.12    4.08
  14   0   5    2.74    4.86
  13   0   5   -1.55    4.34
  13   0   5   -9.25    5.17
  12   0   5   10.03    4.70
  12   0   5    4.08    4.81
  11   0   5   -3.98    4.55
  11   0   5    1.09    4.76
  10   0   5    3.52    4.08
  10   0   5    1.76    4.29
   9   0   5    8.53    4.34
   9   0   5    1.50    4.24
   8   0   5    2.33    3.93
   8   0   5    1.81    4.29
   7   0   5    9.31    3.77
   7   0   5    8.22    3.93
   6   0   5    9.20    3.67
   6   0   5    7.55    3.36
   5   0   5    2.64    3.26
   5   0   5   -4.03    3.10
   4   0   5    6.88    2.95
   4   0   5    9.31    2.95
  -4   0  -5   11.32    3.26
   3   0   5   -0.93    2.64
   3   0   5    1.14    2.59
  -3   0  -5   -0.78    2.64
   2   0   5    3.36    2.17
   2   0   5    1.34    2.33
  -2   0  -5    7.76    2.43
   1   0   5   -0.57    1.81
   1   0   5    1.60    1.81
  -1   0  -5   -0.05    1.86
   0   0   5    0.41    1.24
   0   0  -5    2.33    1.50
  -1   0   5    2.74    1.29
   1   0  -5    2.74    1.34
  -2   0   5   21.71    2.27
   2   0  -5   14.63    2.17
  -3   0   5    4.65    2.69
   3   0  -5    3.57    2.69
  -4   0   5    5.17    3.10
   4   0  -5    0.36    3.21
   4   0  -5    6.15    3.10
  -5   0   5    6.51    3.36
   5   0  -5    3.21    3.52
   5   0  -5    8.07    3.62
  -6   0   5    4.96    3.72
   6   0  -5    4.29    4.14
   6   0  -5   -2.43    3.72
  -7   0   5   -0.31    3.88
   7   0  -5   -0.26    3.83
   7   0  -5    4.03    4.19
  -8   0   5    2.48    3.93
   8   0  -5   -0.10    3.62
   8   0  -5    1.76    4.34
  -9   0   5    2.84    3.52
   9   0  -5   -2.48    3.93
   9   0  -5   -0.47    3.88
 -10   0   5    8.27    3.62
  10   0  -5    8.79    4.45
  10   0  -5   12.10    4.29
  11   0  -5    8.43    4.45
  11   0  -5    4.08    4.19
  12   0  -5    1.40    4.50
  12   0  -5   -0.16    4.19
  13   0  -5    5.64    4.91
  13   0  -5   -0.21    4.03
  14   0  -5    2.17    4.81
  14   0  -5    3.41    5.12
  15   0  -5    4.19    4.91
  15   0  -5    0.57    4.65
  16   0  -5   -0.36    4.86
  16   0  -5   -3.72    4.03
  17   0  -5    8.17    4.55
  17   0  -5    3.15    4.14
  18   0  -5   -3.41    4.76
  18   0  -5    0.36    3.31
  15  -1   5  164.82    7.34
  15  -1   5  160.12    7.55
  14  -1   5  173.56    8.17
  14  -1   5  161.51    7.50
  13  -1   5  310.67   11.84
  13  -1   5  302.24   11.99
  12  -1   5  250.18   10.44
  12  -1   5  273.60   10.81
  11  -1   5   77.24    5.69
  11  -1   5   65.04    5.64
  10  -1   5   35.67    4.86
  10  -1   5   41.98    5.27
   9  -1   5   23.52    4.45
   9  -1   5   19.70    4.50
   8  -1   5  160.48    7.50
   8  -1   5  149.99    7.13
   7  -1   5  367.13   13.34
   7  -1   5  372.56   13.70
   6  -1   5 2121.30   69.69
   6  -1   5 2061.84   67.78
   5  -1   5 1403.69   46.38
   5  -1   5 1351.98   44.67
   4  -1   5   87.27    4.29
   4  -1   5   97.72    4.70
   3  -1   5 1834.87   60.13
   3  -1   5 1812.12   59.35
   2  -1   5   42.03    2.74
   2  -1   5   47.98    2.69
   1  -1   5   12.82    1.40
   1  -1   5   10.44    1.45
   5   1  -5  532.00   18.35
   5   1  -5  498.86   17.22
   6   1  -5  526.83   18.30
   6   1  -5  503.52   17.63
   7   1  -5   43.12    4.29
   7   1  -5   58.42    4.81
   8   1  -5  330.32   12.36
   8   1  -5  311.14   11.58
   9   1  -5  179.14    8.22
   9   1  -5  180.18    7.91
  10   1  -5  739.84   25.28
  10   1  -5  683.49   23.52
  11   1  -5 1301.32   43.53
  11   1  -5 1248.07   41.67
  12   1  -5  350.12   13.24
  12   1  -5  350.84   13.34
  13   1  -5  127.70    6.62
  13   1  -5  141.35    7.60
  14   1  -5  226.55    9.82
  14   1  -5  223.45    9.56
  15   1  -5  190.05    8.17
  15   1  -5  197.24    8.84
  16   1  -5  415.52   15.20
  16   1  -5  410.87   14.89
  17   1  -5  268.33   10.60
  17   1  -5  250.34    9.72
  15  -2   5   34.95    4.60
  15  -2   5   30.35    5.07
  14  -2   5  430.67   15.36
  14  -2   5  428.55   15.67
  13  -2   5  282.81   10.86
  13  -2   5  298.94   11.74
  12  -2   5  170.51    7.86
  12  -2   5  178.06    8.32
  11  -2   5  595.60   20.94
  11  -2   5  567.16   19.85
  10  -2   5  151.90    7.44
  10  -2   5  154.53    7.55
   9  -2   5  474.20   17.01
   9  -2   5  492.40   17.53
   8  -2   5  362.42   13.44
   8  -2   5  358.29   13.39
   7  -2   5   53.77    4.50
   7  -2   5   42.14    4.50
   6  -2   5   18.56    3.46
   6  -2   5    9.62    3.62
   5  -2   5  153.24    6.46
   5  -2   5  165.39    6.98
   4  -2   5 1423.33   46.84
   4  -2   5 1394.90   45.96
   3  -2   5    8.07    2.33
   3  -2   5   11.99    2.38
   2  -2   5 1450.22   47.57
   2  -2   5 1485.37   48.75
   1  -2   5   14.17    1.40
   1  -2   5   14.06    1.50
  -3  -2   5 2761.87   90.17
  -6  -2   5 2762.39   90.43
   6   2  -5 2576.78   84.43
   6   2  -5 2658.99   87.12
  -7  -2   5   20.68    4.50
   7   2  -5   25.70    4.24
   7   2  -5   15.25    4.08
  -8  -2   5  450.68   16.34
   8   2  -5  479.73   16.96
   8   2  -5  444.01   15.87
  -9  -2   5 1395.41   46.48
   9   2  -5 1407.82   46.84
   9   2  -5 1305.45   43.53
 -10  -2   5 1521.05   50.62
  10   2  -5 1406.27   46.84
  10   2  -5 1511.74   50.20
  11   2  -5  572.85   20.22
  11   2  -5  570.26   20.11
  12   2  -5    4.50    4.91
  12   2  -5   -1.55    4.08
  13   2  -5  713.48   24.66
  13   2  -5  722.78   24.97
  15   2  -5  116.69    6.82
  16   2  -5   76.16    5.89
  16   2  -5   73.52    5.27
  17   2  -5  540.79   18.82
  17   2  -5  572.85   19.54
  15  -3   5   37.12    4.70
  15  -3   5   37.43    5.07
  14  -3   5  127.08    7.24
  14  -3   5  123.15    6.41
  13  -3   5   14.79    4.96
  13  -3   5   15.25    4.39
  12  -3   5   10.08    4.19
  12  -3   5    9.41    5.33
  11  -3   5  362.99   13.34
  11  -3   5  359.99   13.65
  10  -3   5 1837.98   60.80
  10  -3   5 1836.94   60.70
   9  -3   5  610.59   21.30
   9  -3   5  668.50   23.16
   8  -3   5  465.00   16.65
   8  -3   5  492.30   17.37
   7  -3   5    9.87    3.67
   7  -3   5    9.20    4.29
   6  -3   5   85.00    4.96
   6  -3   5   76.21    4.81
   5  -3   5 1609.46   53.05
   5  -3   5 1602.22   52.79
   4  -3   5   60.28    3.67
   4  -3   5   56.72    3.77
  -4   3  -5   65.76    3.62
   3  -3   5  304.52   10.60
   3  -3   5  322.98   11.32
  -3   3  -5  300.64   10.55
   2  -3   5 1257.37   41.31
   2  -3   5 1255.82   41.31
  -2   3  -5 1192.23   39.19
   1  -3   5 1296.15   42.60
  -1   3  -5 1304.94   42.86
  -1  -3   5  204.53    7.08
   1   3  -5  213.58    7.39
  -2  -3   5  140.52    5.43
   2   3  -5  130.13    5.02
  -3  -3   5   30.97    3.21
   3   3  -5   29.57    3.00
  -4  -3   5 1182.92   39.19
   4   3  -5 1138.98   37.69
  -5  -3   5  691.24   23.47
   5   3  -5  732.61   24.71
   5   3  -5  681.42   23.11
  -6  -3   5  571.30   19.85
   6   3  -5  629.72   21.61
   6   3  -5  632.82   21.66
  -7  -3   5 2874.07   94.25
   7   3  -5 2712.76   88.93
   7   3  -5 2701.90   88.56
  -8  -3   5  559.92   19.65
   8   3  -5  583.19   20.22
   8   3  -5  566.64   19.75
  -9  -3   5  272.05   10.86
   9   3  -5  293.20   11.43
   9   3  -5  268.79   10.65
 -10  -3   5  208.05    9.20
 -11  -3   5   10.65    4.91
  11   3  -5    8.89    4.65
  11   3  -5   10.65    4.50
 -12  -3   5  803.44   27.61
  12   3  -5  836.01   28.54
  12   3  -5  821.01   28.13
  13   3  -5  236.17    9.77
  13   3  -5  211.04    9.25
  14   3  -5  915.11   31.02
  14   3  -5  952.33   32.31
  15   3  -5  653.50   22.59
  15   3  -5  608.52   21.40
  16   3  -5  326.54   12.36
  16   3  -5  313.88   11.79
  17   3  -5 1394.38   45.96
  17   3  -5 1290.46   42.86
  14  -4   5  148.49    7.08
  14  -4   5  164.93    8.12
  13  -4   5   98.65    5.64
  13  -4   5   85.67    6.36
  12  -4   5    2.74    4.50
  12  -4   5   -4.81    4.70
  11  -4   5   16.44    4.55
  11  -4   5   17.73    4.86
  10  -4   5   73.11    5.17
  10  -4   5   60.03    5.69
   9  -4   5  344.69   12.87
   9  -4   5  332.75   12.56
   8  -4   5   62.14    5.17
   8  -4   5   53.20    4.96
   7  -4   5  212.08    8.74
   7  -4   5  219.16    9.10
   6  -4   5    2.64    3.36
   6  -4   5    2.22    3.67
  -6   4  -5    8.53    3.36
   5  -4   5  170.20    6.93
   5  -4   5  177.75    7.39
  -5   4  -5  166.94    6.82
   4  -4   5  494.78   16.96
   4  -4   5  522.18   17.84
  -4   4  -5  494.47   16.91
   3  -4   5    6.15    2.64
   3  -4   5    4.55    2.38
  -3   4  -5    5.17    2.53
   2  -4   5  227.64    8.12
  -2   4  -5  205.25    7.44
   1  -4   5  598.18   19.90
  -1   4  -5  567.68   18.92
   0  -4   5    8.38    2.07
   0   4  -5    7.24    2.12
  -1  -4   5 1910.87   62.56
   1   4  -5 1895.36   62.04
  -2  -4   5  573.88   19.23
   2   4  -5  562.51   18.87
  -3  -4   5 2520.43   82.41
   3   4  -5 2274.33   74.35
  -4  -4   5  120.93    5.84
   4   4  -5  116.84    5.48
  -5  -4   5  762.07   25.85
   5   4  -5  663.84   22.59
  -6  -4   5 3831.05  125.22
   6   4  -5 3781.42  123.51
  -7  -4   5  125.43    6.46
   7   4  -5  106.97    5.89
   7   4  -5  105.32    5.33
  -8  -4   5  214.51    9.20
   8   4  -5  204.53    8.69
   8   4  -5  203.75    8.58
  -9  -4   5  109.97    6.20
   9   4  -5  107.75    6.10
   9   4  -5  105.78    6.20
 -10  -4   5  173.56    8.22
  10   4  -5  168.24    8.07
  10   4  -5  170.82    7.86
 -11  -4   5   83.60    6.31
  11   4  -5   91.20    6.20
  11   4  -5   76.62    5.74
 -12  -4   5   13.60    4.96
  12   4  -5   14.17    4.96
  12   4  -5    5.27    4.45
 -13  -4   5   11.32    4.86
  13   4  -5   13.86    4.76
  13   4  -5    1.40    4.34
 -14  -4   5  251.89   10.65
  14   4  -5  243.36   10.13
  14   4  -5  263.47   10.81
  15   4  -5   44.36    4.91
  15   4  -5   52.89    5.58
  17   4  -5   92.60    5.17
  17   4  -5  109.09    6.00
  14  -5   5    7.55    4.45
  14  -5   5    2.07    5.33
  13  -5   5    7.13    4.34
  13  -5   5   17.73    5.58
  12  -5   5  203.65    8.53
  12  -5   5  204.01    9.31
  11  -5   5  329.75   12.82
  11  -5   5  332.80   12.46
  10  -5   5  508.58   18.15
  10  -5   5  474.00   16.91
   9  -5   5  791.54   26.99
   9  -5   5  792.58   27.04
   8  -5   5   11.01    4.55
   8  -5   5   -0.98    4.19
   7  -5   5  123.82    6.46
   7  -5   5  119.48    6.41
  -7   5  -5  110.49    5.74
   6  -5   5  229.76    9.15
   6  -5   5  219.73    8.94
  -6   5  -5  232.50    8.94
   5  -5   5   79.67    4.60
   5  -5   5   68.50    4.60
  -5   5  -5   71.45    4.19
   4  -5   5 1704.59   56.04
   4  -5   5 1579.99   52.06
  -4   5  -5 1593.95   52.48
   3  -5   5 3203.40  104.64
  -3   5  -5 3332.66  108.83
   2  -5   5 3327.48  108.62
   1  -5   5 2307.42   75.48
  -1   5  -5 2350.33   76.83
   0  -5   5 1560.34   51.24
   0   5  -5 1564.48   51.34
  -1  -5   5  340.30   11.89
   1   5  -5  318.84   11.12
  -2  -5   5 1435.22   47.25
   2   5  -5 1423.33   46.79
  -3  -5   5  160.38    6.67
   3   5  -5  161.62    6.67
  -4  -5   5  848.42   28.54
   4   5  -5  880.47   29.47
  -5  -5   5   75.90    5.02
   5   5  -5   77.09    4.86
  -6  -5   5 2801.68   91.87
   6   5  -5 2693.63   88.25
  -8  -5   5 2920.08   95.75
   8   5  -5 3003.32   98.44
  -9  -5   5  191.45    8.79
   9   5  -5  206.34    8.94
   9   5  -5  192.02    8.53
 -10  -5   5   38.93    5.38
  10   5  -5   29.83    4.86
  10   5  -5   39.19    4.86
 -11  -5   5   17.99    5.12
  11   5  -5   10.91    4.70
  11   5  -5   17.01    4.81
 -12  -5   5  810.67   27.97
  12   5  -5  781.20   26.88
  12   5  -5  808.09   27.71
 -13  -5   5   83.81    6.00
  13   5  -5   79.93    6.00
  13   5  -5   72.64    5.58
 -14  -5   5  335.54   13.13
  14   5  -5  347.28   13.24
  14   5  -5  395.51   14.58
 -15  -5   5  253.44   10.29
  15   5  -5  256.49   10.13
  15   5  -5  240.10   10.19
  16   5  -5  210.22    9.00
  16   5  -5  224.28    9.10
  17   5  -5  196.15    8.12
  17   5  -5  198.38    8.53
  14  -6   5    4.45    4.08
  14  -6   5   -1.50    4.91
  13  -6   5   57.13    5.07
  13  -6   5   44.51    6.15
  12  -6   5   30.40    4.50
  12  -6   5   30.76    5.64
  11  -6   5    5.02    4.45
  11  -6   5    2.59    4.55
  10  -6   5  320.81   12.25
  10  -6   5  334.45   12.87
   9  -6   5  806.54   27.45
   9  -6   5  837.04   28.54
  -9   6  -5  816.88   27.76
   8  -6   5 1614.11   53.61
   8  -6   5 1582.57   52.48
  -8   6  -5 1526.73   50.56
   7  -6   5 1036.09   34.79
   7  -6   5 1091.41   36.66
  -7   6  -5 1036.61   34.64
   6  -6   5   78.17    5.27
   6  -6   5   82.26    5.22
  -6   6  -5   83.50    4.81
   5  -6   5  290.72   10.96
   5  -6   5  269.62   10.08
  -5   6  -5  256.54    9.62
   4  -6   5 1019.55   34.02
  -4   6  -5  988.53   32.93
   3  -6   5 2295.01   75.23
  -3   6  -5 2397.38   78.48
   2  -6   5 1171.03   38.72
  -2   6  -5 1213.94   40.12
   1  -6   5  131.79    5.53
  -1   6  -5  137.78    5.74
   0  -6   5 2222.63   72.74
   0   6  -5 2133.19   69.85
  -1  -6   5  334.92   11.84
   1   6  -5  365.84   12.77
  -2  -6   5   75.43    4.29
   2   6  -5   79.10    4.29
  -3  -6   5  106.04    5.53
   3   6  -5   99.37    5.07
  -4  -6   5   12.62    3.88
   4   6  -5   12.46    3.72
  -5  -6   5 2165.76   71.24
   5   6  -5 1833.32   60.39
  -6  -6   5 2482.69   81.58
   6   6  -5 2730.85   89.55
  -7  -6   5  675.22   23.27
   7   6  -5  626.62   21.66
  -8  -6   5  808.61   27.66
   8   6  -5  827.22   28.18
  -9  -6   5 1703.04   56.66
   9   6  -5 1865.38   61.63
 -10  -6   5  318.17   12.30
  10   6  -5  306.38   11.99
  10   6  -5  293.97   11.53
 -11  -6   5  199.62    9.00
  11   6  -5  228.67    9.72
  11   6  -5  202.36    8.84
 -12  -6   5  121.34    6.98
  12   6  -5  112.09    6.57
  12   6  -5  123.41    6.72
 -13  -6   5 1854.00   61.47
  13   6  -5 1692.70   56.10
  13   6  -5 1657.54   55.01
 -14  -6   5 2062.88   68.25
  14   6  -5 2164.73   71.40
  14   6  -5 2034.96   67.21
 -15  -6   5 1003.52   33.71
 -16  -6   5    6.77    4.29
  16   6  -5    0.05    4.08
  16   6  -5    2.33    4.03
  13  -7   5    6.31    5.27
  13  -7   5   -1.45    4.08
  12  -7   5   35.16    4.50
  12  -7   5   29.52    5.58
  11  -7   5    9.56    4.14
  11  -7   5   -1.40    4.91
  10  -7   5    4.70    4.29
  10  -7   5    5.74    4.86
 -10   7  -5    1.34    3.36
   9  -7   5   40.07    4.76
   9  -7   5   43.22    5.22
  -9   7  -5   35.62    4.39
   8  -7   5    8.38    3.77
   8  -7   5    3.57    4.76
  -8   7  -5   -1.29    3.77
   7  -7   5 1272.88   42.55
   7  -7   5 1320.45   43.95
  -7   7  -5 1255.82   41.77
   6  -7   5 2109.92   69.49
   6  -7   5 2236.07   73.57
  -6   7  -5 2083.56   68.50
   5  -7   5  236.38    9.20
  -5   7  -5  244.39    9.36
   4  -7   5    3.15    3.36
  -4   7  -5    4.45    3.31
   3  -7   5  134.89    6.10
  -3   7  -5  136.08    6.05
   2  -7   5  189.12    7.60
  -2   7  -5  183.64    7.29
   1  -7   5  260.16    9.67
  -1   7  -5  258.09    9.56
   0  -7   5   33.97    3.46
   0   7  -5   26.01    3.15
  -1  -7   5  533.56   18.30
   1   7  -5  509.46   17.53
  -2  -7   5  661.77   22.49
   2   7  -5  624.55   21.25
  -3  -7   5   40.12    3.93
   3   7  -5   38.83    3.88
  -4  -7   5  326.13   12.05
   4   7  -5  319.10   11.74
  -5  -7   5  459.26   16.34
   5   7  -5  426.02   15.20
  -6  -7   5   -0.98    4.08
   6   7  -5    4.76    4.14
  -7  -7   5  940.44   31.90
   7   7  -5  867.55   29.37
  -8  -7   5   65.14    5.74
   8   7  -5   72.95    5.58
  -9  -7   5   25.44    4.70
   9   7  -5   18.20    4.91
 -10  -7   5 1274.43   42.91
  10   7  -5 1273.92   42.60
 -11  -7   5 1840.04   61.06
  11   7  -5 1715.44   56.92
  11   7  -5 1712.34   56.82
 -12  -7   5  545.96   19.59
  12   7  -5  609.04   21.40
  12   7  -5  556.30   19.65
 -13  -7   5 1623.42   54.08
  13   7  -5 1498.82   49.94
  13   7  -5 1663.23   55.22
 -14  -7   5  408.39   15.15
  14   7  -5  395.36   14.73
  14   7  -5  419.81   15.20
 -15  -7   5  328.82   12.56
  15   7  -5  333.68   12.56
  15   7  -5  330.01   12.41
 -16  -7   5   28.33    4.39
  13  -8   5   -0.72    4.86
  13  -8   5    2.43    4.19
  12  -8   5   11.79    5.27
  12  -8   5   10.96    4.19
  11  -8   5    3.83    4.08
  11  -8   5    8.94    5.38
  10  -8   5   33.66    4.70
  10  -8   5   31.74    5.48
 -10   8  -5   31.64    4.45
   9  -8   5  140.78    6.93
   9  -8   5  131.48    7.19
  -9   8  -5  130.34    6.46
   8  -8   5  242.74   10.13
   8  -8   5  232.76    9.46
  -8   8  -5  241.70    9.67
   7  -8   5   25.18    4.86
   7  -8   5   35.47    4.34
  -7   8  -5   22.33    3.98
   6  -8   5    0.36    3.83
  -6   8  -5    1.65    3.83
   5  -8   5  557.86   19.44
  -5   8  -5  538.73   18.72
   4  -8   5  509.67   17.89
  -4   8  -5  479.94   16.75
   3  -8   5   77.24    4.81
  -3   8  -5   68.97    4.55
   2  -8   5  136.39    6.31
  -2   8  -5  145.75    6.46
   1  -8   5   94.92    5.07
  -1   8  -5   92.75    5.02
   0  -8   5  162.24    6.98
   0   8  -5  151.12    6.41
  -1  -8   5  180.49    7.60
   1   8  -5  179.09    7.50
  -2  -8   5   17.99    3.83
   2   8  -5   16.70    3.77
  -3  -8   5  137.16    6.51
   3   8  -5  128.12    6.20
  -4  -8   5  249.46    9.82
   4   8  -5  243.62    9.56
  -5  -8   5  545.45   19.18
   5   8  -5  553.20   19.34
  -6  -8   5  199.82    8.84
   6   8  -5  177.23    8.01
  -7  -8   5  297.44   11.79
   7   8  -5  253.44   10.24
  -8  -8   5    0.10    4.86
   8   8  -5    2.59    3.98
  -9  -8   5   27.66    5.17
   9   8  -5   26.42    5.02
 -10  -8   5   30.71    5.22
  10   8  -5   26.01    5.22
 -11  -8   5   32.05    5.38
  11   8  -5   25.75    4.76
 -12  -8   5   40.64    5.74
  12   8  -5   37.02    5.22
  12   8  -5   36.40    4.96
 -13  -8   5  819.46   28.28
 -14  -8   5   -9.82    4.91
  14   8  -5   -0.52    4.45
  14   8  -5    2.38    4.60
 -15  -8   5   42.03    5.02
  15   8  -5   37.43    4.55
  15   8  -5   42.45    4.65
 -16  -8   5  132.51    6.20
  16   8  -5  125.79    6.26
  16   8  -5  125.01    5.74
  13  -9   5   -1.86    5.17
  13  -9   5    0.41    4.14
  12  -9   5    4.45    4.19
  12  -9   5    2.22    5.22
  11  -9   5  106.66    6.67
  11  -9   5   95.75    5.64
 -11   9  -5   98.44    6.05
  10  -9   5   79.05    6.41
  10  -9   5   76.47    5.33
 -10   9  -5   75.69    5.38
   9  -9   5   39.60    4.81
   9  -9   5   37.38    5.02
  -9   9  -5   39.29    4.50
   8  -9   5  345.88   12.93
   8  -9   5  353.38   13.44
  -8   9  -5  337.61   12.51
   7  -9   5 1130.19   37.85
  -7   9  -5 1108.47   37.12
   6  -9   5  199.57    8.63
  -6   9  -5  195.12    8.17
   5  -9   5 2367.40   77.97
  -5   9  -5 2256.75   74.19
   4  -9   5 1006.10   33.86
  -4   9  -5  962.68   32.31
   3  -9   5  199.93    8.53
  -3   9  -5  197.50    8.22
   2  -9   5  290.56   11.01
  -2   9  -5  280.01   10.50
   1  -9   5  313.62   11.68
  -1   9  -5  334.20   12.15
   0  -9   5  238.19    9.51
   0   9  -5  210.27    8.32
  -1  -9   5  489.61   17.32
   1   9  -5  480.15   16.80
  -2  -9   5  960.09   32.42
   2   9  -5  847.90   28.59
  -3  -9   5  987.49   33.24
   3   9  -5 1035.57   34.74
  -4  -9   5  469.91   16.75
   4   9  -5  521.15   18.30
  -5  -9   5  908.39   30.81
   5   9  -5 1094.00   36.71
  -6  -9   5  354.82   13.55
   6   9  -5  374.78   13.86
  -7  -9   5 1357.67   45.45
   7   9  -5 1271.33   42.50
  -8  -9   5   17.22    5.17
   8   9  -5   28.80    4.81
  -9  -9   5  259.59   10.91
   9   9  -5  200.70    9.05
 -10  -9   5  939.93   32.16
  10   9  -5  906.32   30.76
 -11  -9   5 2087.17   69.02
  11   9  -5 1940.34   64.11
 -12  -9   5 1601.18   53.46
  12   9  -5 1504.50   50.10
 -13  -9   5  496.85   18.04
  13   9  -5  472.19   17.01
  13   9  -5  512.36   18.46
 -14  -9   5   26.68    5.12
  14   9  -5   38.26    4.70
  14   9  -5   32.73    4.81
 -15  -9   5    7.65    4.45
  15   9  -5    5.89    4.08
  15   9  -5   20.22    4.50
  12 -10   5   49.63    5.84
  12 -10   5   41.41    4.76
 -12  10  -5   41.72    4.29
  11 -10   5  246.30    9.77
  11 -10   5  256.39   10.65
 -11  10  -5  263.11   10.08
  10 -10   5   25.28    5.33
  10 -10   5   15.15    4.39
 -10  10  -5   31.43    4.65
   9 -10   5  249.30   10.03
   9 -10   5  237.83   10.13
  -9  10  -5  226.19    9.20
   8 -10   5  307.36   12.10
   8 -10   5  274.48   10.65
  -8  10  -5  272.36   10.50
   7 -10   5    5.02    4.39
  -7  10  -5   -1.76    4.14
   6 -10   5   73.21    5.38
  -6  10  -5   69.80    5.07
   5 -10   5  719.68   24.87
  -5  10  -5  707.27   24.25
   4 -10   5 2666.74   87.63
  -4  10  -5 2661.57   87.32
   3 -10   5 1677.70   55.58
  -3  10  -5 1717.51   56.72
   2 -10   5  106.19    6.05
  -2  10  -5  113.43    6.05
   1 -10   5   99.52    5.95
  -1  10  -5   91.61    5.38
   0 -10   5  380.78   14.06
   0  10  -5  368.89   13.39
  -1 -10   5  307.98   11.79
   1  10  -5  311.34   11.63
  -2 -10   5 1924.32   63.59
   2  10  -5 1585.16   52.48
  -3 -10   5    9.36    4.14
   3  10  -5   17.42    3.98
  -4 -10   5   88.93    5.79
   4  10  -5   76.05    5.48
  -5 -10   5  547.52   19.49
   5  10  -5  529.94   18.72
  -6 -10   5   80.65    6.05
   6  10  -5   79.05    5.69
  -7 -10   5  161.51    8.12
   7  10  -5  128.32    7.03
  -8 -10   5  800.33   27.61
   8  10  -5  719.68   24.87
  -9 -10   5 2515.26   82.88
   9  10  -5 2259.86   74.50
 -10 -10   5 1581.54   52.84
  10  10  -5 1567.06   52.11
 -11 -10   5 1210.32   40.79
  11  10  -5 1028.34   34.79
 -12 -10   5   -0.88    5.07
  12  10  -5    2.48    4.86
 -13 -10   5  593.53   20.89
  13  10  -5  555.27   19.59
  13  10  -5  585.26   20.47
 -14 -10   5   41.72    5.17
  14  10  -5   38.21    4.76
  14  10  -5   40.12    4.70
 -15 -10   5  167.30    7.55
  15  10  -5  163.48    7.34
  15  10  -5  170.72    7.34
  12 -11   5    8.94    4.91
  12 -11   5   13.08    3.98
 -12  11  -5    9.10    3.93
  11 -11   5   22.90    4.19
  11 -11   5   23.37    5.22
 -11  11  -5   26.47    4.19
  10 -11   5  161.51    8.22
  10 -11   5  189.54    8.01
 -10  11  -5  175.11    7.70
   9 -11   5   17.11    4.55
   9 -11   5   13.55    5.12
  -9  11  -5    9.87    4.65
   8 -11   5   48.13    4.86
  -8  11  -5   42.96    4.86
   7 -11   5  115.29    6.36
  -7  11  -5  126.87    6.36
   6 -11   5  161.72    7.60
  -6  11  -5  159.34    7.39
   5 -11   5    1.40    4.14
  -5  11  -5    2.90    4.08
   4 -11   5  360.67   13.55
  -4  11  -5  337.61   12.51
   3 -11   5  703.14   24.35
  -3  11  -5  701.07   23.99
   2 -11   5 1265.13   42.39
  -2  11  -5 1287.36   42.91
   1 -11   5  956.47   32.36
  -1  11  -5  905.80   30.61
   0 -11   5  232.19    9.67
   0  11  -5  224.12    9.20
  -1 -11   5   78.53    5.84
   1  11  -5   89.13    5.58
  -2 -11   5  190.73    8.79
   2  11  -5  173.97    7.70
  -3 -11   5  196.00    8.89
   3  11  -5  184.52    8.17
  -4 -11   5  186.90    8.58
   4  11  -5  162.86    7.60
  -5 -11   5 1866.41   61.94
   5  11  -5 1644.61   54.54
  -6 -11   5  617.83   21.82
   6  11  -5  508.89   18.25
  -7 -11   5  201.69    9.41
   7  11  -5  203.50    9.00
  -8 -11   5 1386.62   46.53
   8  11  -5 1324.58   44.31
  -9 -11   5 1156.04   39.03
   9  11  -5 1108.99   37.38
 -10 -11   5    4.50    4.96
  10  11  -5   10.19    4.86
 -11 -11   5   29.26    5.48
  11  11  -5   20.22    5.07
 -12 -11   5  142.02    7.60
  12  11  -5  116.84    6.82
 -13 -11   5    6.15    4.34
  13  11  -5    4.91    4.34
 -14 -11   5   34.17    4.50
  14  11  -5   27.30    4.45
  14  11  -5   31.69    4.19
  11 -12   5   -2.22    4.70
  11 -12   5    3.10    3.93
 -11  12  -5    0.36    3.93
  10 -12   5   12.62    5.53
  10 -12   5    6.41    4.45
 -10  12  -5    8.27    4.14
   9 -12   5   30.35    5.43
   9 -12   5   37.95    4.91
  -9  12  -5   33.71    4.65
   8 -12   5   14.01    4.39
  -8  12  -5    7.70    4.29
   7 -12   5   21.46    4.70
  -7  12  -5   25.75    4.24
   6 -12   5  140.68    7.13
  -6  12  -5  127.81    6.72
   5 -12   5   79.21    5.64
  -5  12  -5   73.52    5.53
   4 -12   5  138.77    7.08
  -4  12  -5  138.77    6.93
   3 -12   5  167.56    8.07
  -3  12  -5  158.57    7.29
   2 -12   5    7.55    4.76
  -2  12  -5    6.05    3.77
   1 -12   5  271.95   11.01
  -1  12  -5  266.67   10.44
   0 -12   5    4.50    4.65
   0  12  -5   10.70    4.14
  -1 -12   5  160.38    8.01
   1  12  -5  151.59    7.19
  -2 -12   5    5.07    4.70
   2  12  -5    7.76    4.19
  -3 -12   5  939.41   32.11
   3  12  -5  829.80   28.33
  -4 -12   5  292.99   11.84
   4  12  -5  277.95   10.96
  -5 -12   5  357.10   13.80
   5  12  -5  354.72   13.44
  -6 -12   5  861.86   29.68
   6  12  -5  766.73   26.37
  -7 -12   5   42.86    5.69
   7  12  -5   45.45    5.17
  -8 -12   5 1038.68   35.31
   8  12  -5  888.23   30.30
  -9 -12   5  548.55   19.65
   9  12  -5  476.84   17.37
 -10 -12   5  281.20   11.58
  10  12  -5  272.36   11.17
 -11 -12   5  330.89   12.72
  11  12  -5  333.32   12.77
 -12 -12   5   -3.36    4.86
  12  12  -5    4.65    4.39
 -13 -12   5  109.40    6.41
  13  12  -5  117.41    6.36
  10 -13   5   25.08    5.27
  10 -13   5   14.42    4.08
 -10  13  -5   11.01    4.29
   9 -13   5  114.41    6.31
  -9  13  -5  127.96    6.41
   8 -13   5   85.36    5.74
  -8  13  -5   88.46    5.69
   7 -13   5  368.89   13.65
  -7  13  -5  362.68   13.44
   6 -13   5  361.60   13.44
  -6  13  -5  368.32   13.49
   5 -13   5  552.17   19.49
  -5  13  -5  516.65   18.20
   4 -13   5    9.67    4.45
  -4  13  -5    6.77    4.24
   3 -13   5  647.82   22.65
  -3  13  -5  609.56   21.20
   2 -13   5  467.84   17.01
  -2  13  -5  442.67   15.98
   1 -13   5  777.59   26.94
  -1  13  -5  704.69   24.20
   0 -13   5  285.91   11.37
   0  13  -5  279.60   10.86
  -1 -13   5  118.45    6.93
   1  13  -5  113.95    6.26
  -2 -13   5  362.22   13.91
   2  13  -5  343.76   12.93
  -3 -13   5  345.88   13.49
   3  13  -5  307.83   11.94
  -4 -13   5   69.59    6.05
   4  13  -5   42.81    5.12
  -5 -13   5  483.30   17.79
   5  13  -5  384.81   14.37
  -6 -13   5  150.19    7.96
   6  13  -5  134.63    7.29
  -7 -13   5 2095.96   69.38
   7  13  -5 1973.95   65.25
  -8 -13   5  384.04   14.53
   8  13  -5  338.13   12.98
  -9 -13   5  313.26   12.36
   9  13  -5  321.06   12.41
 -10 -13   5   47.10    5.74
  10  13  -5   35.78    4.96
 -11 -13   5  201.74    8.84
  11  13  -5  184.31    8.32
 -12 -13   5  343.61   12.87
  12  13  -5  317.34   11.99
   9 -14   5   13.08    4.08
  -9  14  -5   13.03    4.14
   8 -14   5   75.79    5.33
  -8  14  -5   75.33    5.22
   7 -14   5  250.85    9.98
  -7  14  -5  239.07    9.67
   6 -14   5    9.67    4.14
  -6  14  -5   13.91    4.55
   5 -14   5   95.85    6.20
  -5  14  -5  102.63    6.00
   4 -14   5  685.04   23.73
  -4  14  -5  625.58   21.61
   3 -14   5   95.13    6.20
  -3  14  -5   92.03    5.84
   2 -14   5   32.47    5.17
  -2  14  -5   42.60    4.70
   1 -14   5   52.89    5.22
  -1  14  -5   57.80    5.12
   0 -14   5 1469.86   49.01
   0  14  -5 1358.71   45.34
  -1 -14   5  676.25   23.58
   1  14  -5  622.48   21.77
  -2 -14   5  140.27    7.44
   2  14  -5  144.40    7.29
  -3 -14   5  476.94   17.22
   3  14  -5  479.73   17.32
  -4 -14   5   79.05    6.05
   4  14  -5   74.81    5.84
  -5 -14   5  387.91   14.63
   5  14  -5  400.06   14.89
  -6 -14   5 1062.46   35.93
   6  14  -5  998.87   33.81
  -7 -14   5  126.46    7.24
   7  14  -5  108.88    6.67
  -8 -14   5   12.46    4.81
   8  14  -5    9.36    4.76
  -9 -14   5  780.69   26.83
   9  14  -5  721.23   24.92
 -10 -14   5  418.42   15.20
  10  14  -5  414.95   14.99
 -11 -14   5    3.77    4.60
  11  14  -5   10.44    4.34
   9 -15   5   -0.98    4.81
  -9  15  -5   11.58    4.24
   8 -15   5  130.49    6.62
  -8  15  -5  131.73    6.31
   7 -15   5   24.76    4.39
  -7  15  -5   23.16    4.34
   6 -15   5  456.93   16.34
  -6  15  -5  479.79   16.96
   5 -15   5   66.23    5.58
  -5  15  -5   77.45    5.64
   4 -15   5    3.21    4.76
  -4  15  -5    4.08    4.50
   3 -15   5  190.26    8.63
  -3  15  -5  173.46    7.91
   2 -15   5   16.70    4.81
  -2  15  -5    2.79    4.45
   1 -15   5   10.34    4.81
  -1  15  -5   15.82    4.60
   0 -15   5   11.68    5.07
   0  15  -5    6.26    4.45
  -1 -15   5   91.05    6.36
   1  15  -5   67.26    5.27
  -2 -15   5  405.23   15.10
   2  15  -5  404.87   14.89
  -3 -15   5  234.72   10.03
   3  15  -5  202.46    8.89
  -4 -15   5  272.21   11.17
   4  15  -5  277.79   10.96
  -5 -15   5  217.71    9.41
   5  15  -5  201.63    8.79
  -6 -15   5  107.18    6.67
   6  15  -5  112.24    6.51
  -7 -15   5   73.47    5.84
   7  15  -5   72.74    5.53
  -8 -15   5  109.66    6.51
   8  15  -5  101.75    6.10
  -9 -15   5    2.07    4.55
   9  15  -5    3.05    4.19
 -10 -15   5   77.03    5.69
  10  15  -5   82.83    5.48
   8 -16   5  212.18    8.79
  -8  16  -5  184.62    7.70
   7 -16   5    0.62    4.19
  -7  16  -5    5.02    3.88
   6 -16   5   15.72    4.29
  -6  16  -5   24.35    4.29
   5 -16   5   38.57    4.91
  -5  16  -5   34.54    4.91
   4 -16   5  154.48    7.29
  -4  16  -5  152.98    7.39
   3 -16   5   11.01    4.65
  -3  16  -5   11.63    4.39
   2 -16   5   62.77    5.64
  -2  16  -5   69.59    5.33
   1 -16   5    5.02    4.76
  -1  16  -5   -0.10    4.39
   0 -16   5    1.45    4.65
   0  16  -5    1.34    4.29
  -1 -16   5  184.00    8.38
   1  16  -5  172.58    7.96
  -2 -16   5  149.11    7.55
   2  16  -5  141.40    7.03
  -3 -16   5   23.68    4.86
   3  16  -5   29.26    4.50
  -4 -16   5  449.70   16.08
   4  16  -5  406.58   14.89
  -5 -16   5  532.52   18.97
   5  16  -5  501.24   17.68
  -6 -16   5  171.80    8.17
   6  16  -5  151.90    7.39
  -7 -16   5   25.95    4.91
   7  16  -5   20.94    4.55
  -8 -16   5   93.89    6.05
   8  16  -5   79.83    5.58
  -9 -16   5   42.65    5.17
   9  16  -5   36.55    4.65
   6 -17   5    7.03    4.19
  -6  17  -5   -0.67    4.19
   5 -17   5   83.70    5.48
  -5  17  -5   82.88    5.38
   4 -17   5   10.03    4.60
  -4  17  -5   18.25    4.45
   3 -17   5   68.50    5.27
  -3  17  -5   71.14    5.38
   2 -17   5  289.94   11.27
  -2  17  -5  262.75   10.39
   1 -17   5  276.39   10.86
  -1  17  -5  288.96   11.32
   0 -17   5   48.81    5.22
   0  17  -5   45.60    5.07
  -1 -17   5   14.53    4.91
   1  17  -5    9.82    4.65
  -2 -17   5  412.26   15.10
   2  17  -5  399.65   14.58
  -3 -17   5 1156.55   38.72
   3  17  -5 1069.18   35.83
  -4 -17   5  111.78    6.46
   4  17  -5   85.31    5.84
  -5 -17   5    0.36    4.39
   5  17  -5   -2.07    4.34
  -6 -17   5   70.11    5.74
   6  17  -5   69.02    5.22
  -7 -17   5  127.34    6.88
   7  17  -5  115.29    6.36
   4 -18   5   96.22    5.69
  -4  18  -5   92.96    5.22
   3 -18   5  218.90    9.25
  -3  18  -5  191.71    8.01
   2 -18   5    0.67    4.50
  -2  18  -5    4.96    4.34
   1 -18   5   24.97    4.76
  -1  18  -5   23.89    4.34
   0 -18   5  170.30    7.70
   0  18  -5  189.12    8.22
  -1 -18   5   77.76    5.64
   1  18  -5   68.35    5.22
  -2 -18   5  422.76   15.25
   2  18  -5  371.63   13.60
  -3 -18   5   25.39    4.76
   3  18  -5   24.45    4.50
  -4 -18   5  347.22   12.87
   4  18  -5  289.42   11.17
  -5 -18   5  530.45   18.61
   5  18  -5  516.60   17.99
  -2  17   6  424.21   15.15
  -3  17   6  150.81    7.08
   2  16   6   11.32    4.34
  -2 -16  -6   20.01    4.55
   1  16   6   -2.43    4.03
  -1 -16  -6   -4.03    4.45
   0  16   6   67.52    5.17
   0 -16  -6   65.92    5.48
  -1  16   6  455.44   16.13
   1 -16  -6  524.77   18.61
  -2  16   6  301.47   11.32
   2 -16  -6  345.57   13.03
  -3  16   6  544.93   18.97
   3 -16  -6  561.47   19.70
  -4  16   6   39.34    4.29
   4 -16  -6   40.02    4.91
  -5  16   6 1302.35   43.17
   5 -16  -6 1269.78   42.19
  -6  16   6  215.65    8.63
   6 -16  -6  208.51    8.43
  -7  16   6  122.01    6.00
   7 -16  -6  113.23    5.89
   5  15   6  803.44   27.30
   4  15   6  112.14    6.41
  -4 -15  -6  120.93    6.88
   3  15   6  161.26    7.44
  -3 -15  -6  193.36    8.84
   2  15   6   28.02    4.70
  -2 -15  -6   37.85    5.17
   1  15   6  110.54    6.31
  -1 -15  -6  104.85    6.46
   0  15   6   85.88    5.69
   0 -15  -6   90.48    6.15
  -1  15   6   -5.12    4.34
   1 -15  -6    6.67    4.60
  -2  15   6  295.27   11.27
   2 -15  -6  332.02   12.72
  -3  15   6 1670.46   55.22
   3 -15  -6 1830.74   60.54
  -4  15   6 3688.88  120.52
   4 -15  -6 3939.11  128.79
  -5  15   6 1112.09   37.12
   5 -15  -6 1156.04   38.67
  -6  15   6  142.13    6.82
   6 -15  -6  150.19    7.29
  -7  15   6   55.94    4.70
   7 -15  -6   60.70    4.96
  -8  15   6   96.53    5.58
   8 -15  -6  105.11    5.89
  -9  15   6   40.38    4.24
   9 -15  -6   37.95    4.08
 -10  15   6    1.96    3.31
  10 -15  -6  -11.84    3.46
   6  14   6   14.63    4.60
  -6 -14  -6   27.66    4.96
   5  14   6   12.41    4.60
  -5 -14  -6   16.39    5.17
   4  14   6    5.84    4.65
  -4 -14  -6   -6.15    4.91
   3  14   6  123.77    6.51
  -3 -14  -6  131.73    7.34
   2  14   6  120.00    6.62
  -2 -14  -6  108.99    6.67
   1  14   6   32.99    4.81
  -1 -14  -6   42.91    5.17
   0  14   6   46.07    5.12
   0 -14  -6   46.58    5.33
  -1  14   6  335.95   12.72
   1 -14  -6  355.96   13.60
  -2  14   6   80.50    5.53
   2 -14  -6   74.09    6.10
  -3  14   6  195.38    8.53
   3 -14  -6  188.30    8.53
  -4  14   6   84.27    5.89
   4 -14  -6   84.38    5.84
  -5  14   6  605.94   21.15
   5 -14  -6  585.77   20.53
  -6  14   6   51.75    5.02
   6 -14  -6   45.81    4.81
  -7  14   6   14.06    4.45
   7 -14  -6    9.05    4.50
  -8  14   6   -0.16    4.29
   8 -14  -6   -5.48    4.19
 -10  14   6   66.54    4.81
  10 -14  -6   67.68    4.65
 -11  14   6  168.29    7.03
  11 -14  -6  143.99    6.46
   7  13   6    5.22    4.60
  -7 -13  -6    5.95    4.29
   6  13   6  449.02   16.08
  -6 -13  -6  471.67   17.06
   5  13   6  463.29   16.49
  -5 -13  -6  464.33   16.96
   4  13   6  402.44   14.79
  -4 -13  -6  395.26   14.79
   3  13   6  390.29   14.42
  -3 -13  -6  366.25   13.96
   2  13   6   21.77    4.55
  -2 -13  -6   11.06    4.76
   1  13   6  254.21   10.13
  -1 -13  -6  280.89   11.84
   0  13   6  328.30   12.62
   0 -13  -6  345.98   13.34
  -1  13   6  248.17   10.19
   1 -13  -6  242.27   10.13
  -2  13   6  304.42   11.79
   2 -13  -6  335.23   13.08
  -3  13   6 1584.12   52.58
   3 -13  -6 1506.57   50.20
  -4  13   6  262.54   10.55
   4 -13  -6  266.52   10.86
  -5  13   6  375.56   14.01
   5 -13  -6  373.08   13.96
  -6  13   6  933.72   31.64
   6 -13  -6  937.34   31.85
  -7  13   6    5.84    4.45
   7 -13  -6    4.34    4.29
  -8  13   6  270.71   10.65
   8 -13  -6  262.12   10.44
  -9  13   6   34.59    4.70
   9 -13  -6   28.13    4.39
 -10  13   6   -3.10    3.83
  10 -13  -6   -2.07    4.24
 -11  13   6  158.36    7.08
  11 -13  -6  155.41    7.03
 -12  13   6  129.98    6.15
  12 -13  -6  146.26    6.57
   9  12   6  131.22    7.03
   8  12   6    1.50    4.65
  -8 -12  -6    4.91    4.96
   7  12   6  309.07   11.89
  -7 -12  -6  340.66   13.03
   6  12   6  281.72   11.17
  -6 -12  -6  334.14   12.98
   5  12   6   71.09    5.53
  -5 -12  -6   61.63    5.89
   4  12   6 1023.17   34.43
  -4 -12  -6  949.75   32.26
   3  12   6  968.36   32.78
  -3 -12  -6  893.40   30.50
   2  12   6  462.31   16.80
  -2 -12  -6  419.40   15.61
   1  12   6    3.26    4.60
  -1 -12  -6    9.31    4.86
   0  12   6  187.42    8.32
   0 -12  -6  174.49    8.48
  -1  12   6 1327.69   44.41
   1 -12  -6 1299.25   43.64
  -2  12   6  924.93   31.43
   2 -12  -6  893.40   30.50
  -3  12   6  108.16    6.62
   3 -12  -6  105.06    6.36
  -4  12   6   13.91    4.65
   4 -12  -6    4.08    4.70
  -5  12   6  624.03   21.87
   5 -12  -6  632.82   22.08
  -6  12   6  784.31   26.94
   6 -12  -6  923.38   31.49
  -7  12   6 1575.85   52.32
   7 -12  -6 1704.59   56.51
  -8  12   6   14.68    4.55
   8 -12  -6   10.08    4.65
  -9  12   6  407.87   14.89
   9 -12  -6  437.75   15.87
 -11  12   6  978.19   32.83
  11 -12  -6  902.70   30.45
 -12  12   6  110.59    5.79
  12 -12  -6  111.26    5.84
 -13  12   6    0.21    3.83
  13 -12  -6    0.57    3.67
   9  11   6  599.22   20.84
  -9 -11  -6  644.20   22.44
   8  11   6  124.60    6.88
  -8 -11  -6  118.29    7.03
   7  11   6  391.43   14.63
  -7 -11  -6  362.63   13.75
   6  11   6  155.98    7.65
  -6 -11  -6  152.10    8.01
   5  11   6 1601.18   53.15
  -5 -11  -6 1432.64   47.82
   4  11   6  175.42    7.96
  -4 -11  -6  172.16    8.38
   3  11   6    1.24    4.50
  -3 -11  -6   -0.10    4.45
   2  11   6 1197.92   40.12
  -2 -11  -6 1202.57   40.48
   1  11   6 2069.08   68.35
  -1 -11  -6 2037.54   67.42
   0  11   6 3158.94  103.71
   0 -11  -6 3751.95  122.95
  -1  11   6  314.50   12.10
   1 -11  -6  359.53   13.75
  -2  11   6  377.00   14.11
   2 -11  -6  390.81   14.68
  -3  11   6  148.74    7.44
   3 -11  -6  155.67    7.65
  -4  11   6  445.35   16.18
   4 -11  -6  508.58   18.25
  -5  11   6  865.48   29.57
   5 -11  -6  779.65   26.83
  -6  11   6  239.74    9.93
   6 -11  -6  260.37   10.65
  -7  11   6  488.11   17.53
   7 -11  -6  485.73   17.47
  -8  11   6 2072.70   68.40
   8 -11  -6 2140.43   70.57
  -9  11   6 2077.35   68.50
   9 -11  -6 2151.80   71.04
 -10  11   6  689.18   23.68
  10 -11  -6  686.59   23.73
 -11  11   6    6.41    4.08
  11 -11  -6   12.25    4.55
 -12  11   6  198.33    8.27
  12 -11  -6  176.77    7.81
 -13  11   6  153.55    6.72
  13 -11  -6  164.41    7.24
 -14  11   6   30.87    4.14
  14 -11  -6   27.82    3.88
  10  10   6   81.43    5.95
 -10 -10  -6   77.09    6.00
   9  10   6   50.98    5.53
  -9 -10  -6   52.89    5.74
   8  10   6   17.63    4.96
  -8 -10  -6   25.02    5.27
   7  10   6  422.81   15.46
  -7 -10  -6  396.96   14.79
   6  10   6  549.07   19.39
  -6 -10  -6  570.78   20.32
   5  10   6   41.00    4.91
  -5 -10  -6   32.52    5.22
   4  10   6   12.67    4.81
  -4 -10  -6   18.10    4.70
   3  10   6   79.62    5.84
  -3 -10  -6  114.62    6.93
   2  10   6   88.62    5.69
  -2 -10  -6   80.60    5.84
   1  10   6    9.36    3.72
  -1 -10  -6   13.13    4.76
   0  10   6  685.56   23.78
   0 -10  -6  721.75   25.02
  -1  10   6 1063.49   35.78
   1 -10  -6 1212.39   40.69
  -2  10   6  156.76    7.50
   2 -10  -6  151.69    7.60
  -3  10   6  137.01    6.93
   3 -10  -6  156.29    7.86
  -4  10   6  722.78   24.82
   4 -10  -6  702.10   24.40
  -5  10   6   47.36    5.02
   5 -10  -6   48.70    5.27
  -6  10   6   10.86    4.50
   6 -10  -6   13.44    4.60
  -7  10   6    7.19    4.55
   7 -10  -6    9.82    4.50
  -8  10   6   57.49    5.38
   8 -10  -6   63.18    5.53
  -9  10   6  210.37    8.94
   9 -10  -6  199.77    8.74
 -10  10   6  252.72   10.29
  10 -10  -6  234.88    9.62
 -12  10   6   93.99    5.89
  12 -10  -6  100.25    5.84
 -13  10   6   25.49    4.50
  13 -10  -6   24.71    4.50
 -14  10   6  536.66   18.56
  14 -10  -6  530.45   18.41
 -15  10   6  372.45   13.29
  15 -10  -6  331.51   11.99
  15 -10  -6  352.14   12.77
  11   9   6  104.13    6.20
  11   9   6  102.47    5.79
 -11  -9  -6  115.60    6.77
  10   9   6  168.65    8.01
 -10  -9  -6  174.65    8.27
   9   9   6  423.79   15.46
  -9  -9  -6  434.08   15.98
   8   9   6  265.18   10.70
  -8  -9  -6  277.58   11.48
   7   9   6    3.41    4.45
  -7  -9  -6    6.62    4.86
   6   9   6   36.14    4.86
  -6  -9  -6   43.89    4.96
   5   9   6   54.39    5.38
  -5  -9  -6   52.32    5.43
   4   9   6   25.08    4.96
  -4  -9  -6   28.80    4.91
   3   9   6  364.49   13.75
  -3  -9  -6  426.22   15.72
   2   9   6 1316.31   44.00
  -2  -9  -6 1320.96   44.15
   1   9   6  351.67   13.29
  -1  -9  -6  333.63   12.77
   0   9   6 1079.00   36.24
   0  -9  -6 1054.70   35.73
  -1   9   6 1315.79   43.89
   1  -9  -6 1461.07   48.70
  -2   9   6   43.07    4.81
   2  -9  -6   44.77    5.07
  -3   9   6  508.17   18.04
   3  -9  -6  508.43   18.10
  -4   9   6   67.63    5.27
   4  -9  -6   74.14    5.79
  -5   9   6   17.22    4.50
   5  -9  -6   17.63    4.55
  -6   9   6 1073.32   36.09
   6  -9  -6 1083.66   36.55
  -7   9   6 1150.35   38.57
   7  -9  -6 1086.24   36.71
  -8   9   6  743.98   25.54
   8  -9  -6  739.33   25.54
  -9   9   6  591.98   20.84
   9  -9  -6  690.73   23.94
 -10   9   6  121.34    6.67
  10  -9  -6  129.56    6.88
 -11   9   6   54.13    5.22
  11  -9  -6   55.89    5.07
 -12   9   6   55.48    5.27
  12  -9  -6   49.94    4.96
 -13   9   6   77.03    5.48
  13  -9  -6   58.68    4.81
 -14   9   6   -1.71    3.83
  14  -9  -6    6.88    4.03
 -15   9   6   38.41    4.39
  15  -9  -6   42.24    4.14
  15  -9  -6   37.22    5.17
  12   8   6   30.97    4.70
  12   8   6   15.41    4.08
 -12  -8  -6   28.95    5.02
  11   8   6  132.25    6.67
  11   8   6  136.08    7.39
 -11  -8  -6  127.13    7.03
  10   8   6   84.84    5.53
  10   8   6   76.93    5.95
 -10  -8  -6   88.25    6.31
   9   8   6  363.25   13.75
  -9  -8  -6  402.23   15.10
   8   8   6  782.76   26.78
  -8  -8  -6  751.22   26.11
   7   8   6 2132.15   70.31
  -7  -8  -6 2151.28   71.04
   6   8   6  341.74   13.13
  -6  -8  -6  339.99   13.13
   5   8   6  128.74    7.08
  -5  -8  -6  124.03    6.93
   4   8   6  126.98    6.82
  -4  -8  -6  109.81    6.67
   3   8   6 2175.58   71.76
  -3  -8  -6 2198.85   72.54
   2   8   6 2013.76   66.44
  -2  -8  -6 2216.94   73.11
   1   8   6  233.69    9.56
  -1  -8  -6  210.89    9.10
   0   8   6  519.08   18.35
   0  -8  -6  483.61   17.37
  -1   8   6 3049.33   99.94
   1  -8  -6 3162.56  103.66
  -2   8   6 2676.05   87.79
   2  -8  -6 2539.04   83.45
  -3   8   6 1598.08   52.89
   3  -8  -6 1768.18   58.47
  -4   8   6  136.59    6.62
   4  -8  -6  122.38    6.36
  -5   8   6 2618.66   85.98
   5  -8  -6 2472.87   81.33
  -6   8   6 2905.60   95.29
   6  -8  -6 2982.12   97.82
  -7   8   6 1902.08   62.82
   7  -8  -6 2160.59   71.30
  -8   8   6  281.67   11.12
   8  -8  -6  297.02   11.58
  -9   8   6   34.02    4.86
   9  -8  -6   37.28    5.02
 -10   8   6  455.64   16.49
  10  -8  -6  433.20   15.77
 -11   8   6  405.08   14.99
  11  -8  -6  438.53   15.87
 -12   8   6   68.97    5.58
  12  -8  -6   74.86    5.89
 -13   8   6  113.43    6.51
  13  -8  -6   99.11    5.95
 -14   8   6  571.30   19.80
  14  -8  -6  542.86   18.92
  14  -8  -6  587.32   20.53
 -15   8   6 1546.38   51.03
  15  -8  -6 1620.31   53.51
  15  -8  -6 1533.46   50.82
 -16   8   6  561.99   19.23
  12   7   6   11.99    4.55
  12   7   6    7.60    4.08
 -12  -7  -6   13.86    4.81
  11   7   6   -0.36    4.29
  11   7   6   11.32    5.02
 -11  -7  -6    3.10    4.86
  10   7   6  241.91    9.82
  10   7   6  250.18   10.34
 -10  -7  -6  246.20   10.29
   9   7   6  617.83   21.51
   9   7   6  605.94   21.20
  -9  -7  -6  600.25   21.15
   8   7   6   53.82    5.48
  -8  -7  -6   54.60    5.74
   7   7   6  121.19    6.67
  -7  -7  -6  134.53    7.34
   6   7   6 1746.46   57.85
  -6  -7  -6 1808.51   59.97
   5   7   6 2216.94   73.05
  -5  -7  -6 2176.62   71.81
   4   7   6  399.65   14.79
  -4  -7  -6  374.16   13.96
   3   7   6  827.22   28.18
  -3  -7  -6  694.35   23.99
   2   7   6   29.16    4.55
  -2  -7  -6   38.72    4.65
   1   7   6  902.18   30.50
  -1  -7  -6  908.39   30.76
   0   7   6 1210.84   40.38
   0  -7  -6 1184.99   39.60
  -1   7   6   25.39    4.14
   1  -7  -6   18.66    4.34
  -2   7   6  190.57    8.07
   2  -7  -6  175.37    7.76
  -3   7   6  709.34   24.20
   3  -7  -6  736.74   25.18
  -4   7   6 4994.33  162.86
   4  -7  -6 5136.51  167.56
  -5   7   6 2437.19   79.98
   5  -7  -6 2440.81   80.24
  -6   7   6  282.60   11.01
   6  -7  -6  292.01   11.17
  -7   7   6 1398.52   46.48
   7  -7  -6 1424.88   47.46
  -8   7   6 1506.57   50.10
   8  -7  -6 1590.84   52.84
  -9   7   6  258.97   10.44
   9  -7  -6  251.68   10.24
 -10   7   6   33.24    4.70
  10  -7  -6   48.29    5.22
 -11   7   6 1189.64   39.86
  11  -7  -6 1338.54   44.72
 -12   7   6  825.15   28.18
  12  -7  -6  873.75   29.73
 -13   7   6  912.53   30.97
  13  -7  -6  826.18   28.18
 -14   7   6 1249.10   41.72
 -15   7   6   64.42    4.86
  15  -7  -6   60.80    5.07
  15  -7  -6   51.49    5.07
 -16   7   6  518.05   17.94
  16  -7  -6  523.73   18.41
  16  -7  -6  545.96   18.92
  13   6   6   33.86    4.29
  13   6   6   37.64    5.53
 -13  -6  -6   28.18    4.81
  12   6   6   42.55    4.60
  12   6   6   43.27    5.43
 -12  -6  -6   47.72    5.38
  11   6   6  149.93    7.08
  11   6   6  153.97    7.81
 -11  -6  -6  146.06    7.81
  10   6   6  300.69   11.99
  10   6   6  293.46   11.48
 -10  -6  -6  302.45   12.10
   9   6   6   -2.22    4.50
   9   6   6    1.14    4.76
  -9  -6  -6    6.57    5.07
   8   6   6    5.64    4.81
  -8  -6  -6    2.33    4.86
   7   6   6  236.38    9.93
  -7  -6  -6  216.06    9.51
   6   6   6   11.06    4.65
  -6  -6  -6   10.65    4.65
   5   6   6  614.73   21.51
  -5  -6  -6  646.26   22.49
   4   6   6  470.27   16.80
  -4  -6  -6  463.24   16.60
   3   6   6  290.35   11.12
  -3  -6  -6  289.22   11.12
   2   6   6  618.86   21.40
  -2  -6  -6  611.11   21.20
   1   6   6  752.25   25.54
  -1  -6  -6  764.14   25.95
   0   6   6 1178.79   39.24
   0  -6  -6 1206.70   40.22
  -1   6   6   16.85    3.57
   1  -6  -6   11.63    3.93
  -2   6   6   64.68    4.45
   2  -6  -6   59.15    4.65
  -3   6   6   78.69    4.96
   3  -6  -6   69.64    4.70
  -4   6   6   65.97    4.91
   4  -6  -6   72.69    5.02
  -5   6   6 1451.25   48.13
   5  -6  -6 1436.26   47.67
  -6   6   6  457.35   16.29
   6  -6  -6  486.66   17.37
  -7   6   6  247.65    9.82
   7  -6  -6  251.73   10.08
  -8   6   6    6.72    4.29
   8  -6  -6   10.50    4.29
  -9   6   6  776.03   26.57
   9  -6  -6  775.00   26.63
 -10   6   6  225.88    9.36
  10  -6  -6  215.13    9.25
 -11   6   6  205.10    8.79
  11  -6  -6  200.50    8.84
 -12   6   6    7.55    4.14
  12  -6  -6    3.00    4.65
 -13   6   6  360.93   13.55
  13  -6  -6  394.94   14.89
  13  -6  -6  407.61   15.10
 -14   6   6  500.31   17.73
  14  -6  -6  499.07   17.79
  14  -6  -6  554.24   19.49
 -15   6   6    3.52    4.14
  15  -6  -6    2.22    4.19
  15  -6  -6   -3.88    5.02
 -16   6   6  105.63    5.79
  16  -6  -6   98.08    6.20
  16  -6  -6   92.75    5.53
 -17   6   6  100.04    5.43
  17  -6  -6  111.42    6.57
  17  -6  -6  102.63    5.38
  13   5   6   84.07    6.00
  13   5   6   65.82    4.96
  12   5   6    1.50    4.19
  12   5   6   -1.71    4.96
 -12  -5  -6    0.83    4.91
  11   5   6   21.71    4.86
  11   5   6   21.61    4.39
 -11  -5  -6   25.33    5.22
  10   5   6   72.59    6.00
  10   5   6   65.76    5.48
 -10  -5  -6   60.54    5.74
   9   5   6  210.06    8.94
   9   5   6  202.36    9.00
  -9  -5  -6  205.82    9.31
   8   5   6   10.70    4.34
   8   5   6   14.17    4.60
  -8  -5  -6   21.56    4.96
   7   5   6   29.16    4.81
  -7  -5  -6   26.11    4.91
   6   5   6  124.55    6.77
  -6  -5  -6  128.99    6.93
   5   5   6 1096.06   36.76
  -5  -5  -6 1156.04   38.78
   4   5   6  860.82   29.21
  -4  -5  -6  775.00   26.47
   3   5   6  813.78   27.51
  -3  -5  -6  764.14   26.01
   2   5   6  247.60    9.56
  -2  -5  -6  265.59   10.29
   1   5   6 4447.33  145.07
   0   5   6 2474.93   81.07
   0  -5  -6 2473.90   81.17
  -1   5   6  628.17   21.46
   1  -5  -6  591.98   20.37
  -2   5   6  685.56   23.32
   2  -5  -6  772.41   26.06
  -3   5   6  988.53   33.09
   3  -5  -6  963.19   32.26
  -4   5   6  435.79   15.46
   4  -5  -6  444.01   15.77
  -5   5   6 2875.62   94.15
   5  -5  -6 2945.41   96.42
  -6   5   6 1285.81   42.71
   6  -5  -6 1254.27   41.72
  -7   5   6  289.37   11.12
   7  -5  -6  301.37   11.58
  -8   5   6  113.90    6.15
   8  -5  -6  107.02    6.31
  -9   5   6  153.24    7.24
   9  -5  -6  161.67    7.76
 -10   5   6    3.72    4.50
  10  -5  -6   11.22    4.50
 -11   5   6    5.33    4.50
  11  -5  -6    5.95    4.76
 -12   5   6 2153.87   70.99
  12  -5  -6 2205.57   72.74
  12  -5  -6 2067.53   68.25
 -13   5   6 1331.30   44.51
  13  -5  -6 1566.54   52.06
  13  -5  -6 1506.05   50.10
 -14   5   6   36.14    5.17
  14  -5  -6   28.13    5.58
  14  -5  -6   27.97    4.65
 -15   5   6    1.09    3.77
  15  -5  -6   -0.21    4.60
  15  -5  -6    6.36    4.24
 -16   5   6  690.21   23.42
  16  -5  -6  700.03   24.04
  16  -5  -6  640.06   21.97
 -17   5   6   85.26    4.76
  17  -5  -6   81.64    5.12
  17  -5  -6   86.96    5.69
  13   4   6  369.61   13.39
  13   4   6  366.46   13.55
  12   4   6  371.47   13.55
  12   4   6  380.21   14.11
  11   4   6  729.50   24.97
  11   4   6  750.70   25.80
 -11  -4  -6  830.32   28.44
  10   4   6  709.86   24.40
  10   4   6  684.01   23.73
 -10  -4  -6  653.50   22.90
   9   4   6   17.53    4.45
   9   4   6    8.89    4.70
  -9  -4  -6   17.63    5.22
   8   4   6  214.35    9.31
   8   4   6  228.42    9.41
  -8  -4  -6  246.82   10.39
   7   4   6  760.01   26.06
   7   4   6  771.90   26.52
  -7  -4  -6  780.17   26.83
   6   4   6  149.42    7.29
  -6  -4  -6  158.67    7.70
   5   4   6  116.07    6.15
  -5  -4  -6  131.01    6.77
   4   4   6 2879.24   94.35
  -4  -4  -6 2793.41   91.61
   3   4   6 3643.38  119.02
  -3  -4  -6 3768.50  123.15
   1   4   6 1480.20   48.81
  -1  -4  -6 1545.86   50.98
   0   4   6  784.31   26.37
   0  -4  -6  832.39   27.97
  -1   4   6 2230.39   73.11
   1  -4  -6 2024.62   66.44
  -2   4   6 1540.18   50.82
   2  -4  -6 1417.65   46.79
  -3   4   6   65.92    4.65
   3  -4  -6   55.17    4.14
  -4   4   6   42.65    4.14
   4  -4  -6   52.63    4.39
  -5   4   6 2276.92   74.71
   5  -4  -6 2320.35   76.21
  -6   4   6 3858.46  126.05
   6  -4  -6 4063.71  132.77
  -7   4   6 3877.59  126.67
   7  -4  -6 4132.47  134.99
  -8   4   6   42.76    4.50
   8  -4  -6   46.48    4.70
  -9   4   6 1679.77   55.58
   9  -4  -6 1660.12   54.96
 -10   4   6 1482.79   49.27
  10  -4  -6 1545.86   51.39
 -11   4   6 4921.43  160.64
  11  -4  -6 4763.23  155.52
  11  -4  -6 4719.28  154.17
 -12   4   6 1575.85   52.32
  12  -4  -6 1853.49   61.32
  12  -4  -6 1779.04   58.94
 -13   4   6  271.07   10.81
  13  -4  -6  278.15   11.06
  13  -4  -6  266.16   10.81
 -14   4   6  369.77   13.60
  14  -4  -6  374.73   14.11
  14  -4  -6  405.44   14.94
 -15   4   6 1134.84   38.00
  15  -4  -6 1219.63   40.74
  15  -4  -6 1191.71   39.91
 -16   4   6    0.67    3.83
  16  -4  -6   11.06    4.65
  16  -4  -6    5.89    4.39
  17  -4  -6  202.77    8.69
  17  -4  -6  214.25    8.48
  14   3   6  134.73    6.36
  14   3   6  141.66    7.03
  13   3   6  362.01   13.13
  13   3   6  353.58   13.13
  12   3   6    9.05    4.08
  12   3   6    0.98    4.70
  11   3   6  182.51    8.12
  11   3   6  194.29    9.00
  10   3   6  474.00   16.91
  10   3   6  463.81   16.96
 -10  -3  -6  462.41   16.85
   9   3   6  253.65   10.29
   9   3   6  265.18   10.81
  -9  -3  -6  239.74   10.19
   8   3   6  137.73    7.08
   8   3   6  137.63    6.98
  -8  -3  -6  138.82    7.19
   7   3   6  301.21   11.53
   7   3   6  298.47   11.48
  -7  -3  -6  292.84   11.43
   6   3   6  461.95   16.44
   6   3   6  436.05   15.61
  -6  -3  -6  465.26   16.70
   5   3   6 1278.57   42.55
  -5  -3  -6 1256.85   41.88
   4   3   6  513.24   17.89
  -4  -3  -6  508.02   17.68
   3   3   6   18.61    3.41
  -3  -3  -6   17.53    3.62
   2   3   6 1395.41   46.01
  -2  -3  -6 1392.83   45.96
   1   3   6 2139.39   70.11
  -1  -3  -6 2200.40   72.07
   0   3   6 2184.89   71.55
   0  -3  -6 2186.44   71.61
  -1   3   6   86.29    4.45
   1  -3  -6   83.08    4.45
  -2   3   6   13.75    3.10
   2  -3  -6   12.46    3.21
  -3   3   6  593.53   20.22
   3  -3  -6  589.91   20.16
  -4   3   6  696.41   23.52
   4  -3  -6  751.22   25.39
  -5   3   6  126.41    6.00
   5  -3  -6  133.23    6.57
  -6   3   6  285.49   10.81
   6  -3  -6  308.35   11.53
  -7   3   6 2531.29   83.03
   7  -3  -6 2740.68   89.86
  -8   3   6 3952.03  129.05
   8  -3  -6 3972.72  129.77
  -9   3   6 4688.26  152.98
   9  -3  -6 5155.64  168.18
 -10   3   6 2136.81   70.37
  10  -3  -6 2037.02   67.21
  10  -3  -6 2035.47   67.16
 -11   3   6 1021.61   34.48
  11  -3  -6  998.87   33.86
  11  -3  -6 1102.27   37.12
 -12   3   6 2179.72   71.86
  12  -3  -6 2130.09   70.31
  12  -3  -6 2037.02   67.31
 -13   3   6 1050.57   35.42
  13  -3  -6 1120.36   37.64
  13  -3  -6 1079.00   36.40
 -14   3   6    7.96    4.60
  14  -3  -6   13.18    5.22
  14  -3  -6    6.67    4.70
  16  -3  -6    1.14    4.39
  16  -3  -6   12.10    4.76
  17  -3  -6  288.23   11.22
  17  -3  -6  282.60   10.65
  14   2   6  219.52    8.89
  14   2   6  229.97    9.56
  13   2   6  319.77   11.84
  13   2   6  321.27   12.46
  12   2   6   26.78    4.34
  12   2   6   31.69    5.33
  11   2   6  271.02   10.50
  11   2   6  263.73   10.75
  10   2   6  342.36   13.24
  10   2   6  359.01   13.29
   9   2   6   75.48    5.84
   9   2   6   87.27    5.64
   8   2   6   51.70    5.07
   8   2   6   59.09    5.17
  -8  -2  -6   47.57    5.27
   7   2   6  449.95   16.13
   7   2   6  474.20   16.85
  -7  -2  -6  437.96   15.87
   6   2   6 2139.91   70.42
   6   2   6 2185.41   71.92
  -6  -2  -6 2246.93   73.98
   5   2   6  161.05    6.93
   5   2   6  148.90    6.67
  -5  -2  -6  152.00    6.98
   4   2   6  273.50   10.19
  -4  -2  -6  299.14   11.06
   3   2   6  185.45    7.29
  -3  -2  -6  201.58    7.86
   2   2   6  428.60   14.73
  -2  -2  -6  426.12   14.73
   1   2   6   10.65    2.74
  -1  -2  -6   11.68    2.84
   0   2   6   33.97    2.95
   0  -2  -6   40.12    3.10
  -1   2   6    1.96    2.64
   1  -2  -6    7.34    2.53
  -2   2   6  896.50   29.73
   2  -2  -6  878.40   29.16
  -3   2   6  260.99    9.51
   3  -2  -6  257.78    9.41
  -4   2   6  156.40    6.46
   4  -2  -6  173.15    7.19
   5  -2  -6 4984.51  162.44
  -6   2   6  112.86    5.79
   6  -2  -6  133.49    6.36
  -7   2   6  153.76    6.98
   7  -2  -6  178.06    7.70
  -8   2   6 3036.92   99.47
   8  -2  -6 3062.78  100.25
   8  -2  -6 3160.49  103.45
  -9   2   6  150.86    7.24
 -10   2   6    8.27    4.08
  10  -2  -6   12.77    4.50
  10  -2  -6   12.30    4.24
 -11   2   6   52.32    4.81
  11  -2  -6   60.18    5.48
  11  -2  -6   48.81    5.38
 -12   2   6  116.48    6.46
  12  -2  -6  131.84    7.13
  12  -2  -6  113.38    6.72
 -13   2   6  444.11   16.13
  13  -2  -6  463.19   16.70
  13  -2  -6  459.88   16.80
 -14   2   6    8.69    4.39
  14  -2  -6    3.93    4.81
  14  -2  -6   14.94    4.91
  15  -2  -6   -8.43    5.07
  15  -2  -6   -0.78    4.55
  16  -2  -6  155.10    7.76
  16  -2  -6  129.56    6.57
  17  -2  -6  126.25    6.77
  17  -2  -6  136.28    6.41
  18  -2  -6   31.02    4.76
  18  -2  -6   30.56    3.93
  14   1   6   57.49    5.64
  14   1   6   60.03    4.91
  13   1   6  289.16   11.37
  13   1   6  313.31   11.68
  12   1   6  110.85    6.31
  12   1   6  101.75    6.57
  11   1   6   63.80    5.07
  11   1   6   66.64    5.64
  10   1   6  498.61   17.68
  10   1   6  467.12   16.85
   9   1   6  362.48   13.55
   9   1   6  368.84   13.70
   8   1   6  216.89    9.15
   8   1   6  216.83    9.00
   7   1   6  128.12    6.36
   7   1   6  150.40    7.13
   6   1   6 1489.51   49.32
   6   1   6 1466.76   48.65
  -6  -1  -6 1464.69   48.60
   5   1   6  396.19   14.06
   5   1   6  398.25   14.17
  -5  -1  -6  380.68   13.70
   4   1   6  331.09   11.79
   4   1   6  353.64   12.56
  -4  -1  -6  358.50   12.77
   3   1   6  362.79   12.62
   3   1   6  364.44   12.72
  -3  -1  -6  370.90   13.03
   2   1   6   99.68    4.45
  -2  -1  -6  106.81    4.76
   1   1   6  166.63    6.26
  -1  -1  -6  163.53    6.10
  -2   1   6   34.79    2.74
   2  -1  -6   31.18    2.64
  -6   1   6   28.18    3.83
   6  -1  -6   30.09    3.83
  -7   1   6 2333.27   76.57
   7  -1  -6 2323.97   76.36
   7  -1  -6 2414.96   79.21
  -8   1   6  548.03   19.13
   8  -1  -6  582.67   20.22
   8  -1  -6  567.16   19.80
  -9   1   6 1448.67   48.03
   9  -1  -6 1455.39   48.44
   9  -1  -6 1474.00   48.91
 -10   1   6  499.59   17.73
  10  -1  -6  536.66   19.03
  10  -1  -6  558.89   19.75
 -11   1   6  142.28    6.93
  11  -1  -6  141.56    7.19
  11  -1  -6  160.43    7.65
 -12   1   6  131.37    6.98
  12  -1  -6  130.18    7.19
  12  -1  -6  140.52    7.44
  13  -1  -6  338.44   13.03
  13  -1  -6  347.43   13.29
  14  -1  -6  570.78   20.16
  14  -1  -6  586.81   20.63
  15  -1  -6   41.31    5.07
  15  -1  -6   46.17    5.69
  17  -1  -6  710.37   24.14
  17  -1  -6  713.48   24.45
  18  -1  -6   89.49    5.17
  18  -1  -6   87.12    5.53
  14   0   6  153.91    7.03
  14   0   6  137.21    7.19
  13   0   6   49.01    4.91
  13   0   6   48.50    5.53
  12   0   6 1114.16   37.17
  12   0   6 1133.81   38.10
  11   0   6  674.70   23.21
  11   0   6  680.39   23.52
  10   0   6  501.35   17.89
  10   0   6  512.31   18.20
   9   0   6  711.41   24.35
   9   0   6  699.00   23.99
   8   0   6  946.13   32.11
   8   0   6  981.29   33.04
   7   0   6 2973.85   97.51
   7   0   6 2968.16   97.30
   6   0   6  925.97   31.07
   6   0   6  928.04   31.12
   5   0   6  224.18    8.74
   5   0   6  240.26    9.00
   4   0   6  295.27   10.60
   4   0   6  314.34   11.22
   3   0   6    8.58    2.43
   3   0   6    5.22    2.59
  -3   0  -6   10.81    2.84
   2   0   6   32.99    2.48
   2   0   6   39.50    2.69
  -2   0  -6   45.03    2.95
   1   0   6    4.08    1.71
   1   0   6    6.05    1.55
  -1   0  -6    7.08    1.91
   0   0   6  227.12    7.76
   0   0  -6  225.78    7.76
  -3   0   6  585.26   19.59
   3   0  -6  627.13   20.94
  -4   0   6  167.77    6.57
   4   0  -6  148.74    6.05
   4   0  -6  150.14    6.10
  -6   0   6 1511.22   49.84
   6   0  -6 1505.54   49.68
   6   0  -6 1498.30   49.48
  -7   0   6   25.85    3.98
   7   0  -6   24.61    4.19
   7   0  -6   24.35    4.29
  -8   0   6  350.28   12.87
   8   0  -6  368.37   13.39
   8   0  -6  330.89   12.36
  -9   0   6 1957.41   64.52
   9   0  -6 2051.50   67.63
   9   0  -6 2112.51   69.54
 -10   0   6 7310.54  238.03
  10   0  -6 7000.33  228.00
  11   0  -6 4101.97  134.11
  11   0  -6 4010.46  131.17
  12   0  -6    9.98    4.70
  12   0  -6   12.62    4.65
  13   0  -6  806.54   27.76
  13   0  -6  731.05   25.33
  14   0  -6   38.36    5.27
  14   0  -6   46.58    5.27
  15   0  -6 3351.78  109.81
  15   0  -6 3086.56  101.23
  16   0  -6 1568.61   52.06
  16   0  -6 1444.53   48.03
  17   0  -6  117.21    6.57
  17   0  -6  114.88    5.89
  18   0  -6    1.76    3.67
  18   0  -6    2.79    4.08
  14  -1   6   63.95    4.96
  14  -1   6   64.47    5.74
  13  -1   6  299.50   11.32
  13  -1   6  286.01   11.22
  12  -1   6   99.78    5.95
  12  -1   6   96.37    6.57
  11  -1   6   73.57    5.07
  11  -1   6   64.88    5.38
  10  -1   6  479.01   17.01
  10  -1   6  494.52   17.68
   9  -1   6  394.38   14.48
   9  -1   6  363.77   13.55
   8  -1   6  224.07    9.41
   8  -1   6  201.89    8.58
   7  -1   6  140.32    6.67
   7  -1   6  131.22    6.62
   6  -1   6 1484.34   49.12
   6  -1   6 1470.38   48.70
   5  -1   6  401.82   14.11
   5  -1   6  372.56   13.18
   4  -1   6  338.44   11.89
   4  -1   6  339.47   11.89
   3  -1   6  356.84   12.30
   3  -1   6  366.15   12.56
   2  -1   6   90.22    3.72
   2  -1   6   90.89    3.72
   1  -1   6  146.06    5.07
   1  -1   6  149.21    5.22
   2   1  -6   32.16    1.71
   2   1  -6   30.50    1.65
   4   1  -6 4720.31  153.76
   6   1  -6   25.33    3.98
   6   1  -6   33.24    3.83
   7   1  -6 2307.42   75.79
   7   1  -6 2406.69   79.00
   8   1  -6  548.55   19.23
   8   1  -6  557.34   19.44
   9   1  -6 1372.15   45.70
   9   1  -6 1414.03   47.05
  11   1  -6  151.07    7.34
  11   1  -6  143.94    7.60
  12   1  -6  155.78    7.70
  12   1  -6  143.99    7.19
  13   1  -6  338.80   13.18
  13   1  -6  334.14   12.77
  14   1  -6  574.40   20.27
  14   1  -6  616.28   21.56
  15   1  -6   44.36    5.74
  15   1  -6   52.37    5.22
  16   1  -6  489.14   17.63
  16   1  -6  522.18   18.35
  18   1  -6   91.05    5.17
  18   1  -6   93.73    5.74
  14  -2   6  223.30    9.31
  14  -2   6  221.07    8.84
  13  -2   6  306.64   11.53
  13  -2   6  308.29   12.05
  12  -2   6   35.36    4.50
  12  -2   6   34.95    5.07
  11  -2   6  259.80   10.29
  11  -2   6  254.16   10.39
  10  -2   6  331.09   12.67
  10  -2   6  353.27   13.03
   9  -2   6   89.75    5.48
   9  -2   6   88.77    5.74
   8  -2   6   61.52    5.12
   8  -2   6   58.63    4.76
   7  -2   6  438.01   15.56
   7  -2   6  437.65   15.56
   6  -2   6 2185.92   71.81
   6  -2   6 2232.46   73.31
   5  -2   6  142.38    6.15
   5  -2   6  148.12    6.36
   4  -2   6  279.19    9.98
   4  -2   6  283.58   10.13
   3  -2   6  188.09    6.93
   3  -2   6  181.26    6.72
   2  -2   6  433.82   14.53
   2  -2   6  417.69   14.01
   2   2  -6  802.40   26.78
   2   2  -6  792.06   26.42
   3   2  -6  239.84    8.43
   3   2  -6  257.37    8.94
  -4  -2   6  164.00    6.46
   4   2  -6  151.38    6.10
   4   2  -6  151.02    6.05
  -6  -2   6  106.97    5.69
   6   2  -6  117.83    5.84
   6   2  -6  114.57    5.69
  -7  -2   6  165.44    7.60
   7   2  -6  157.27    7.03
   7   2  -6  184.31    7.91
  -8  -2   6 3013.14   98.80
   9   2  -6  166.94    7.86
   9   2  -6  158.05    7.39
  10   2  -6   22.90    4.65
  10   2  -6   15.51    4.55
  11   2  -6   74.19    5.27
  11   2  -6   73.57    5.69
  12   2  -6  119.27    6.72
  12   2  -6  122.22    6.93
  13   2  -6  436.72   15.98
  13   2  -6  478.29   17.16
  14   2  -6   10.39    4.86
  14   2  -6    0.57    4.65
  15   2  -6    0.57    4.19
  15   2  -6    6.26    4.76
  16   2  -6  146.99    7.39
  16   2  -6  152.31    7.19
  17   2  -6  125.38    6.62
  17   2  -6  123.51    6.31
  18   2  -6   29.93    4.45
  18   2  -6   26.37    4.81
  13  -3   6  364.91   13.29
  13  -3   6  358.81   13.60
  12  -3   6    2.12    4.14
  12  -3   6   16.39    5.43
  11  -3   6  173.72    7.76
  11  -3   6  192.74    8.69
  10  -3   6  493.38   17.47
  10  -3   6  465.78   16.70
   9  -3   6  261.40   10.24
   9  -3   6  256.18   10.19
   8  -3   6  126.62    6.36
   8  -3   6  127.34    6.41
   7  -3   6  290.77   11.06
   7  -3   6  294.70   11.06
   6  -3   6  446.39   15.67
   6  -3   6  473.38   16.60
   5  -3   6 1308.04   43.27
   5  -3   6 1319.41   43.64
   4  -3   6  509.00   17.37
   4  -3   6  507.14   17.27
   3  -3   6   13.24    2.27
   3  -3   6   13.18    2.43
   2  -3   6 1317.86   43.33
   2  -3   6 1405.24   46.17
  -1  -3   6   84.48    3.10
   1   3  -6   77.29    2.95
  -2  -3   6   17.16    1.76
   2   3  -6   11.79    1.65
   2   3  -6   13.86    1.71
  -3  -3   6  606.97   20.32
   3   3  -6  580.09   19.39
   3   3  -6  560.44   18.72
  -4  -3   6  794.13   26.52
   4   3  -6  713.48   23.83
   4   3  -6  708.31   23.68
  -5  -3   6  137.53    6.26
   5   3  -6  123.51    5.69
   5   3  -6  120.52    5.53
  -6  -3   6  346.91   12.82
   6   3  -6  286.63   10.65
   6   3  -6  283.68   10.50
  -7  -3   6 2977.99   97.61
   7   3  -6 2793.41   91.46
   7   3  -6 2890.09   94.61
  -8  -3   6 4069.91  133.03
   8   3  -6 3945.83  128.89
   8   3  -6 3620.63  118.40
  -9  -3   6 4897.65  159.86
   9   3  -6 4422.52  144.45
   9   3  -6 4905.40  160.12
 -10  -3   6 2363.78   78.02
  10   3  -6 1972.92   65.14
  10   3  -6 1892.26   62.61
 -11  -3   6 1049.53   35.57
  11   3  -6 1006.10   34.02
  11   3  -6 1016.96   34.38
 -12  -3   6 2282.61   75.33
  12   3  -6 2344.13   77.24
  12   3  -6 2159.56   71.14
  13   3  -6 1152.42   38.72
  13   3  -6 1148.28   38.67
  14   3  -6    7.50    4.81
  14   3  -6    8.74    4.45
  15   3  -6   20.53    5.12
  15   3  -6   17.73    4.60
  16   3  -6   10.75    4.34
  16   3  -6    5.74    4.34
  17   3  -6  290.20   11.12
  17   3  -6  276.65   10.55
  13  -4   6  338.59   12.51
  13  -4   6  357.25   13.65
  12  -4   6  372.71   13.60
  12  -4   6  368.58   13.80
  11  -4   6  730.54   24.87
  11  -4   6  740.88   25.54
  10  -4   6  670.05   23.11
  10  -4   6  675.22   23.32
   9  -4   6    9.77    4.14
   9  -4   6    4.65    4.70
   8  -4   6  199.82    8.32
   8  -4   6  231.16    9.41
   7  -4   6  770.35   26.16
   7  -4   6  720.20   24.56
   6  -4   6  151.07    6.72
   6  -4   6  152.73    6.82
   5  -4   6  111.16    5.43
   5  -4   6  115.60    5.58
   4  -4   6 2788.24   91.20
   4  -4   6 2747.40   89.86
  -4   4  -6 2696.21   88.15
   3  -4   6 3691.46  120.52
  -3   4  -6 3652.69  119.27
   1  -4   6 1495.71   49.12
  -1   4  -6 1474.00   48.39
   0  -4   6  806.54   26.68
   0   4  -6  767.24   25.39
  -1  -4   6 2035.47   66.69
   1   4  -6 2014.79   66.02
  -2  -4   6 1455.90   47.77
   2   4  -6 1376.28   45.19
  -3  -4   6   71.50    3.88
   3   4  -6   62.20    3.57
  -4  -4   6   57.18    4.14
   4   4  -6   53.82    3.72
  -5  -4   6 2402.03   78.79
   5   4  -6 2338.44   76.62
  -6  -4   6 4321.18  141.09
   6   4  -6 3931.87  128.37
   6   4  -6 3978.92  129.87
  -7  -4   6 4397.70  143.63
   7   4  -6 4476.80  146.06
   7   4  -6 4298.95  140.37
  -8  -4   6   52.06    5.02
   8   4  -6   52.17    4.86
   8   4  -6   53.10    4.81
  -9  -4   6 1528.80   50.82
 -10  -4   6 1584.64   52.79
  10   4  -6 1518.98   50.51
  10   4  -6 1500.88   49.94
 -11  -4   6 4524.37  147.87
  11   4  -6 4653.62  152.00
  11   4  -6 4759.09  155.47
 -12  -4   6 1983.77   65.66
  12   4  -6 1856.07   61.37
  12   4  -6 1856.07   61.47
 -13  -4   6  285.29   11.68
  13   4  -6  266.83   10.96
  13   4  -6  274.64   11.12
  14   4  -6  365.01   13.86
  14   4  -6  391.17   14.53
  15   4  -6 1263.06   42.29
  15   4  -6 1208.26   40.48
  16   4  -6   -1.60    4.34
  16   4  -6    1.14    4.50
  17   4  -6  203.86    8.32
  17   4  -6  235.14    9.41
  13  -5   6   68.14    5.38
  13  -5   6   63.64    6.15
  12  -5   6   -0.72    4.14
  12  -5   6   -1.45    5.02
  11  -5   6   24.45    4.65
  11  -5   6   18.15    4.70
  10  -5   6   61.11    5.27
  10  -5   6   76.21    5.58
   9  -5   6  205.46    8.58
   9  -5   6  194.55    8.48
   8  -5   6   15.20    3.93
   8  -5   6   11.48    4.14
   7  -5   6   35.52    4.29
   7  -5   6   39.24    4.55
   6  -5   6  125.07    6.20
   6  -5   6  123.72    5.95
  -6   5  -6  113.79    5.33
   5  -5   6 1079.52   35.98
   5  -5   6 1095.55   36.45
  -5   5  -6 1051.60   34.95
   4  -5   6  853.59   28.59
   4  -5   6  870.13   29.06
  -4   5  -6  852.03   28.38
   3  -5   6  775.00   25.85
   3  -5   6  756.39   25.33
  -3   5  -6  761.56   25.39
   2  -5   6  268.79    9.51
  -2   5  -6  245.22    8.74
   0  -5   6 2432.02   79.57
   0   5  -6 2336.37   76.41
  -1  -5   6  604.39   20.16
   1   5  -6  584.22   19.49
  -2  -5   6  748.12   24.92
   2   5  -6  707.27   23.52
  -3  -5   6  936.82   31.12
   3   5  -6  930.10   30.87
  -4  -5   6  461.23   15.98
   4   5  -6  425.09   14.79
  -5  -5   6 2720.00   89.13
   5   5  -6 2861.14   93.58
  -6  -5   6 1231.00   41.05
   6   5  -6 1283.74   42.65
  -7  -5   6  321.27   12.20
   7   5  -6  291.23   11.12
  -8  -5   6  134.16    6.93
   8   5  -6  106.09    6.00
   8   5  -6  116.69    6.31
  -9  -5   6  158.98    7.91
   9   5  -6  154.02    7.44
   9   5  -6  177.90    8.12
 -10  -5   6    5.84    4.86
  10   5  -6   11.32    4.50
  10   5  -6   10.24    4.34
 -11  -5   6    5.02    4.65
  11   5  -6    3.52    4.19
  11   5  -6   -9.25    4.70
 -12  -5   6 2408.76   79.46
  12   5  -6 2150.25   70.99
  12   5  -6 2118.71   70.06
 -13  -5   6 1505.54   50.25
  13   5  -6 1556.20   51.75
  13   5  -6 1475.03   49.17
 -14  -5   6   23.11    5.43
  14   5  -6   32.47    5.02
  14   5  -6   22.90    5.38
 -15  -5   6   -0.72    5.12
  15   5  -6    3.05    4.96
  15   5  -6   -1.29    4.45
  16   5  -6  629.72   21.82
  16   5  -6  693.83   23.78
  17   5  -6   79.57    4.91
  17   5  -6   70.68    5.22
  13  -6   6   19.80    4.45
  13  -6   6   35.47    5.48
  12  -6   6   45.50    4.55
  12  -6   6   41.98    5.69
  11  -6   6  147.40    6.93
  11  -6   6  150.97    7.86
  10  -6   6  292.42   11.12
  10  -6   6  280.74   11.12
   9  -6   6    3.41    3.98
   9  -6   6    0.10    4.50
   8  -6   6    2.74    3.88
   8  -6   6    1.71    4.65
   7  -6   6  213.63    8.63
   7  -6   6  210.53    8.84
  -7   6  -6  209.44    8.38
   6  -6   6   11.48    3.57
   6  -6   6   14.53    4.08
  -6   6  -6   13.18    3.26
   5  -6   6  640.58   21.92
   5  -6   6  650.92   22.23
  -5   6  -6  640.58   21.77
   4  -6   6  465.67   16.13
   4  -6   6  442.41   15.46
  -4   6  -6  452.38   15.61
   3  -6   6  279.86   10.13
  -3   6  -6  285.29   10.24
   2  -6   6  602.84   20.32
  -2   6  -6  600.77   20.22
   1  -6   6  753.80   25.18
  -1   6  -6  773.97   25.75
   0  -6   6 1162.24   38.36
   0   6  -6 1165.34   38.41
  -1  -6   6   18.30    2.84
   1   6  -6   19.34    2.64
  -2  -6   6   64.42    3.77
   2   6  -6   61.99    3.67
  -3  -6   6   75.74    4.29
   3   6  -6   72.74    4.24
  -4  -6   6   63.90    4.29
   4   6  -6   67.73    4.50
  -5  -6   6 1419.20   47.00
   5   6  -6 1451.25   47.98
  -6  -6   6  482.27   17.06
   6   6  -6  449.13   15.92
  -7  -6   6  270.66   10.75
   7   6  -6  236.79    9.56
  -8  -6   6    6.51    4.70
   8   6  -6    3.98    4.45
  -9  -6   6  839.63   28.80
   9   6  -6  824.12   28.13
 -10  -6   6  239.38   10.34
  10   6  -6  253.75   10.44
  10   6  -6  239.58    9.93
 -11  -6   6  230.23   10.13
  11   6  -6  213.68    9.31
  11   6  -6  229.71    9.93
 -12  -6   6   14.48    4.96
  12   6  -6   10.34    4.24
  12   6  -6    8.53    5.02
 -13  -6   6  345.88   13.55
  13   6  -6  362.94   13.80
  13   6  -6  383.31   14.48
 -14  -6   6  509.00   18.51
  14   6  -6  513.55   18.61
  14   6  -6  572.85   20.22
 -15  -6   6    0.93    4.76
  15   6  -6    1.71    4.91
  15   6  -6    5.27    4.29
 -16  -6   6  113.90    6.41
  16   6  -6  102.99    6.20
  16   6  -6  113.33    6.10
  17   6  -6   96.37    5.64
  17   6  -6   83.24    5.17
  12  -7   6    9.10    5.69
  12  -7   6   14.11    4.34
  11  -7   6    4.03    5.12
  11  -7   6    1.03    3.88
  10  -7   6  219.73    8.94
  10  -7   6  233.38    9.98
   9  -7   6  583.71   20.32
   9  -7   6  580.60   20.32
   8  -7   6   46.43    4.29
   8  -7   6   51.70    5.27
  -8   7  -6   46.89    4.45
   7  -7   6  109.81    5.69
   7  -7   6  115.76    6.46
  -7   7  -6   98.39    5.38
   6  -7   6 1749.05   57.75
   6  -7   6 1689.08   55.79
  -6   7  -6 1656.50   54.70
   5  -7   6 2151.28   70.78
   5  -7   6 2141.98   70.52
  -5   7  -6 2118.71   69.64
   4  -7   6  376.28   13.44
  -4   7  -6  368.11   13.08
   3  -7   6  776.03   26.11
  -3   7  -6  740.88   24.87
   2  -7   6   37.02    3.41
  -2   7  -6   33.76    3.36
   1  -7   6  940.44   31.33
  -1   7  -6  901.15   29.99
   0  -7   6 1248.07   41.26
   0   7  -6 1176.20   38.88
  -1  -7   6   14.79    3.10
   1   7  -6   20.84    3.00
  -2  -7   6  179.76    7.39
   2   7  -6  184.83    7.34
  -3  -7   6  691.24   23.47
   3   7  -6  641.09   21.77
   4   7  -6 5216.64  169.94
  -5  -7   6 2708.62   88.87
   5   7  -6 2234.52   73.42
  -6  -7   6  286.73   11.22
   6   7  -6  280.32   10.75
  -7  -7   6 1496.23   49.84
   7   7  -6 1440.91   47.88
  -8  -7   6 1494.68   49.89
   8   7  -6 1598.08   52.99
  -9  -7   6  272.46   11.06
   9   7  -6  290.46   11.48
 -10  -7   6   32.99    5.12
  10   7  -6   43.17    5.33
 -11  -7   6 1341.13   45.03
  11   7  -6 1282.19   42.96
  11   7  -6 1316.83   44.10
 -12  -7   6  837.56   28.85
 -13  -7   6  790.51   27.35
  13   7  -6  855.14   29.21
  13   7  -6  762.07   26.21
 -14  -7   6 1263.06   42.39
  14   7  -6 1338.54   44.72
  14   7  -6 1276.50   42.86
 -15  -7   6   71.45    5.79
  15   7  -6   77.45    5.95
  15   7  -6   57.54    5.17
 -16  -7   6  576.47   20.01
  12  -8   6   13.96    5.38
  12  -8   6   21.61    4.29
  11  -8   6  124.13    6.41
  11  -8   6  118.40    6.77
  10  -8   6   78.22    6.10
  10  -8   6   86.24    5.48
   9  -8   6  371.01   13.55
   9  -8   6  387.45   14.27
  -9   8  -6  365.84   13.39
   8  -8   6  775.00   26.52
   8  -8   6  787.41   26.73
  -8   8  -6  781.72   26.52
   7  -8   6 1999.28   65.97
   7  -8   6 1999.80   65.92
  -7   8  -6 2002.38   65.97
  -6   8  -6  333.94   12.30
   5  -8   6  133.49    6.46
  -5   8  -6  140.32    6.31
   4  -8   6  111.88    5.69
  -4   8  -6   98.90    5.02
   3  -8   6 2128.02   70.00
  -3   8  -6 2023.07   66.49
   2  -8   6 2251.07   73.88
  -2   8  -6 2166.28   71.09
   1  -8   6  218.18    8.58
  -1   8  -6  222.57    8.48
   0  -8   6  508.22   17.63
   0   8  -6  482.01   16.60
  -1  -8   6 2941.79   96.27
   1   8  -6 3007.46   98.34
  -2  -8   6 2771.18   90.74
   2   8  -6 2638.83   86.39
  -3  -8   6 1863.83   61.42
   3   8  -6 1630.65   53.82
  -4  -8   6  135.87    6.57
   4   8  -6  129.41    6.26
  -5  -8   6 2547.31   83.76
   5   8  -6 2427.37   79.67
  -6  -8   6 2906.64   95.39
   6   8  -6 3044.16   99.73
  -7  -8   6 2233.49   73.62
   7   8  -6 1968.26   64.99
  -8  -8   6  293.97   11.79
   8   8  -6  298.57   11.63
  -9  -8   6   34.69    5.17
   9   8  -6   35.62    5.33
 -10  -8   6  525.80   19.03
  10   8  -6  516.13   18.51
 -11  -8   6  482.58   17.79
  11   8  -6  432.64   15.82
 -12  -8   6   64.16    6.15
  12   8  -6   67.06    5.74
  12   8  -6   66.75    5.79
 -13  -8   6  108.26    7.08
  13   8  -6  104.23    6.46
  13   8  -6  104.80    6.57
 -14  -8   6  662.81   23.11
  14   8  -6  660.22   22.85
  14   8  -6  662.81   23.06
 -15  -8   6 1713.38   56.66
  15   8  -6 1631.17   54.03
  15   8  -6 1647.20   54.54
 -16  -8   6  579.05   20.06
  16   8  -6  613.18   21.04
  16   8  -6  562.51   19.49
  11  -9   6   94.56    5.58
  11  -9   6   95.85    6.67
  10  -9   6  174.13    7.60
  10  -9   6  167.15    7.86
 -10   9  -6  156.96    7.19
   9  -9   6  404.66   14.99
   9  -9   6  430.46   15.46
  -9   9  -6  398.98   14.48
   8  -9   6  283.79   11.01
   8  -9   6  286.27   11.01
  -8   9  -6  282.81   10.81
   7  -9   6   10.13    4.34
   7  -9   6   11.48    4.14
  -7   9  -6    9.36    4.03
   6  -9   6   39.96    4.39
  -6   9  -6   37.54    4.08
   5  -9   6   49.84    4.60
  -5   9  -6   51.96    4.45
   4  -9   6   26.42    3.98
  -4   9  -6   22.54    4.03
   3  -9   6  351.72   13.03
  -3   9  -6  355.60   12.77
   2  -9   6 1314.76   43.69
  -2   9  -6 1299.77   43.07
   1  -9   6  332.59   12.36
  -1   9  -6  331.35   11.99
   0  -9   6 1107.96   37.07
   0   9  -6 1055.74   35.21
  -1  -9   6 1460.56   48.39
   1   9  -6 1427.99   47.25
  -2  -9   6   41.83    4.45
   2   9  -6   36.91    3.93
  -3  -9   6  509.00   17.89
   3   9  -6  496.59   17.32
  -4  -9   6   79.31    5.33
   4   9  -6   71.76    5.12
  -5  -9   6   17.27    4.34
   5   9  -6   13.39    4.03
  -6  -9   6 1037.64   35.00
   6   9  -6 1005.07   33.86
  -7  -9   6 1088.31   36.76
   7   9  -6 1146.73   38.47
  -8  -9   6  865.48   29.73
   8   9  -6  847.38   28.95
  -9  -9   6  727.43   25.39
   9   9  -6  681.94   23.73
 -10  -9   6  114.52    7.08
  10   9  -6  107.64    6.46
 -11  -9   6   68.97    5.95
  11   9  -6   69.33    5.84
 -12  -9   6   46.27    5.74
  12   9  -6   64.88    6.00
  12   9  -6   64.16    5.33
 -13  -9   6   82.15    6.20
  13   9  -6   80.24    5.58
  13   9  -6   86.29    6.15
 -14  -9   6   -0.52    4.45
  14   9  -6    1.76    4.14
  14   9  -6   10.86    4.96
 -15  -9   6   34.28    4.19
  15   9  -6   38.26    4.39
  15   9  -6   52.17    5.12
  11 -10   6   44.36    5.95
  11 -10   6   47.00    4.60
  10 -10   6   72.23    5.27
  10 -10   6   71.35    6.00
 -10  10  -6   71.04    4.96
   9 -10   6   44.93    5.64
   9 -10   6   52.84    4.96
  -9  10  -6   56.56    4.91
   8 -10   6   17.42    4.70
   8 -10   6   20.37    4.24
  -8  10  -6   15.77    4.45
   7 -10   6  401.61   14.84
   7 -10   6  419.92   15.15
  -7  10  -6  397.17   14.32
   6 -10   6  534.07   18.66
  -6  10  -6  524.77   18.35
   5 -10   6   33.81    4.39
  -5  10  -6   35.21    4.14
   4 -10   6   22.65    4.34
  -4  10  -6   17.06    4.03
   3 -10   6   93.68    5.69
  -3  10  -6   91.72    5.17
   2 -10   6   89.39    5.64
  -2  10  -6   77.97    4.76
   1 -10   6   14.58    3.98
  -1  10  -6   16.85    3.93
   0 -10   6  685.04   23.63
   0  10  -6  696.41   23.73
  -1 -10   6 1068.66   35.93
   1  10  -6 1129.67   37.69
  -2 -10   6  146.06    7.03
   2  10  -6  147.24    6.88
  -3 -10   6  145.80    7.19
   3  10  -6  125.32    6.31
  -4 -10   6  718.65   24.87
   4  10  -6  654.54   22.65
  -5 -10   6   55.58    5.38
   5  10  -6   45.03    4.76
  -6 -10   6   12.72    4.70
   6  10  -6   11.48    4.60
  -7 -10   6   13.60    5.02
   7  10  -6    4.50    4.45
  -8 -10   6   61.21    5.84
   8  10  -6   82.31    5.95
  -9 -10   6  230.02   10.08
   9  10  -6  218.80    9.41
 -10 -10   6  257.89   10.96
  10  10  -6  258.30   10.60
 -11 -10   6  220.66    9.77
  11  10  -6  219.16    9.56
 -12 -10   6  103.09    6.77
  12  10  -6  106.76    6.57
 -13 -10   6   27.35    5.33
  13  10  -6   41.21    4.91
  13  10  -6   30.97    5.27
 -14 -10   6  617.83   21.51
  14  10  -6  582.67   20.32
  14  10  -6  603.35   20.99
 -15 -10   6  377.00   13.70
  15  10  -6  370.75   13.49
  15  10  -6  391.27   14.06
  10 -11   6   49.94    4.76
  10 -11   6   58.16    5.74
 -10  11  -6   55.32    4.91
   9 -11   6  583.19   20.42
   9 -11   6  585.26   20.22
  -9  11  -6  577.50   19.90
   8 -11   6  117.83    6.20
   8 -11   6  117.67    7.03
  -8  11  -6  116.38    6.26
   7 -11   6  384.81   14.11
  -7  11  -6  394.38   14.37
   6 -11   6  153.76    7.24
  -6  11  -6  155.67    7.08
   5 -11   6 1439.88   47.82
  -5  11  -6 1490.54   49.48
   4 -11   6  167.87    7.55
  -4  11  -6  158.62    7.13
   3 -11   6    1.09    4.14
  -3  11  -6   -3.52    3.72
   2 -11   6 1166.89   39.24
  -2  11  -6 1163.79   38.88
   1 -11   6 2074.25   68.50
  -1  11  -6 2099.58   69.07
   0 -11   6 3633.04  118.96
   0  11  -6 3499.65  114.47
  -1 -11   6  310.36   12.05
   1  11  -6  294.54   11.17
  -2 -11   6  388.02   14.37
   2  11  -6  412.42   14.89
  -3 -11   6  156.65    7.70
   3  11  -6  150.55    7.08
  -4 -11   6  518.56   18.66
   4  11  -6  479.11   17.11
  -5 -11   6  930.62   31.74
   5  11  -6  809.64   27.66
  -6 -11   6  255.20   10.75
   6  11  -6  229.14    9.67
  -7 -11   6  487.13   17.63
   7  11  -6  500.47   17.94
  -8 -11   6 2384.97   78.69
   8  11  -6 2185.92   72.07
  -9 -11   6 2488.38   82.15
   9  11  -6 2269.68   74.86
 -10 -11   6  863.93   29.68
  10  11  -6  760.01   26.21
 -11 -11   6   10.50    5.27
  11  11  -6    0.16    4.86
 -12 -11   6  224.23    9.72
  12  11  -6  202.51    9.20
 -13 -11   6  178.63    8.38
  13  11  -6  159.39    7.50
 -14 -11   6   29.57    4.96
  14  11  -6   28.18    4.76
  14  11  -6   28.38    4.65
  10 -12   6  265.85   11.06
  10 -12   6  271.64   10.55
 -10  12  -6  278.67   10.50
   9 -12   6  114.36    6.77
   9 -12   6  133.08    6.77
  -9  12  -6  128.58    6.46
   8 -12   6    6.00    4.24
   8 -12   6   -0.67    4.91
  -8  12  -6    7.96    4.39
   7 -12   6  343.81   12.67
  -7  12  -6  339.73   12.62
   6 -12   6  302.45   11.53
  -6  12  -6  286.17   11.17
   5 -12   6   67.52    5.12
  -5  12  -6   67.52    5.38
   4 -12   6 1042.81   35.11
  -4  12  -6 1037.12   34.85
   3 -12   6 1012.31   34.07
  -3  12  -6  948.20   32.00
   2 -12   6  491.11   17.53
  -2  12  -6  422.86   15.30
   1 -12   6    8.69    4.81
  -1  12  -6   12.46    4.03
   0 -12   6  210.42    9.15
   0  12  -6  188.45    8.17
  -1 -12   6 1410.41   47.10
   1  12  -6 1334.41   44.41
  -2 -12   6  845.31   28.95
   2  12  -6  849.97   28.80
  -3 -12   6  106.92    6.67
   3  12  -6  110.95    6.10
  -4 -12   6    1.34    4.70
   4  12  -6    4.14    4.14
  -5 -12   6  638.51   22.44
   5  12  -6  622.48   21.66
  -6 -12   6  784.82   27.09
   6  12  -6  848.93   28.95
  -7 -12   6 1775.93   59.04
   7  12  -6 1761.46   58.37
  -8 -12   6    7.91    5.17
   8  12  -6   12.87    4.86
  -9 -12   6  464.28   17.16
   9  12  -6  396.60   14.99
 -10 -12   6  873.75   29.99
  10  12  -6  905.80   30.87
 -11 -12   6 1105.37   37.17
  11  12  -6 1013.34   34.23
 -12 -12   6  132.30    7.03
  12  12  -6  118.14    6.62
 -13 -12   6    2.33    4.70
  13  12  -6    4.70    4.39
  14  12  -6  246.92    9.72
   9 -13   6    2.69    4.81
   9 -13   6    4.50    4.19
  -9  13  -6    0.16    3.93
   8 -13   6   70.88    5.17
  -8  13  -6   83.03    5.33
   7 -13   6    8.07    4.19
  -7  13  -6    0.31    4.19
   6 -13   6  464.90   16.60
  -6  13  -6  454.45   16.18
   5 -13   6  461.12   16.54
  -5  13  -6  448.87   16.08
   4 -13   6  387.09   14.27
  -4  13  -6  404.51   14.68
   3 -13   6  429.89   15.72
  -3  13  -6  431.50   15.61
   2 -13   6   21.77    4.81
  -2  13  -6   28.13    4.24
   1 -13   6  264.97   10.75
  -1  13  -6  241.29    9.72
   0 -13   6  327.79   12.87
   0  13  -6  348.52   12.98
  -1 -13   6  242.48   10.55
   1  13  -6  223.87    9.25
  -2 -13   6  323.08   12.72
   2  13  -6  306.02   11.68
  -3 -13   6 1583.09   52.74
   3  13  -6 1581.02   52.48
  -4 -13   6  268.02   11.01
   4  13  -6  236.17    9.82
  -5 -13   6  403.89   15.10
   5  13  -6  380.47   14.22
  -6 -13   6 1014.89   34.48
   6  13  -6  966.81   32.78
  -7 -13   6   -2.84    5.02
   7  13  -6    1.60    4.81
  -8 -13   6  324.42   12.72
   8  13  -6  292.01   11.58
  -9 -13   6   43.74    5.64
   9  13  -6   36.91    5.07
 -10 -13   6   -0.31    4.96
  10  13  -6    0.88    4.65
 -11 -13   6  166.17    7.81
  11  13  -6  172.89    8.01
 -12 -13   6  185.09    8.32
  12  13  -6  166.84    7.70
 -13 -13   6  271.02   10.65
  13  13  -6  259.64   10.13
   8 -14   6   -3.21    4.45
  -8  14  -6    2.12    4.03
   7 -14   6    7.24    4.50
  -7  14  -6    2.84    3.98
   6 -14   6   21.15    4.65
  -6  14  -6   20.06    4.60
   5 -14   6    8.43    4.60
  -5  14  -6    7.65    4.29
   4 -14   6    6.05    4.24
  -4  14  -6    5.95    4.14
   3 -14   6  127.55    6.82
  -3  14  -6  123.00    6.31
   2 -14   6  122.58    6.98
  -2  14  -6  128.43    6.67
   1 -14   6   35.62    4.70
  -1  14  -6   36.97    4.65
   0 -14   6   54.18    5.43
   0  14  -6   51.08    4.91
  -1 -14   6  348.57   13.24
   1  14  -6  327.16   12.36
  -2 -14   6   86.91    6.15
   2  14  -6   80.45    5.53
  -3 -14   6  193.26    8.84
   3  14  -6  197.34    8.74
  -4 -14   6   84.07    6.20
   4  14  -6   84.43    5.84
  -5 -14   6  738.81   25.64
   5  14  -6  673.15   23.32
  -6 -14   6   61.47    5.74
   6  14  -6   42.14    5.12
  -7 -14   6   18.15    5.02
   7  14  -6   12.62    4.65
  -8 -14   6   -1.29    5.02
   8  14  -6   -5.58    4.76
  -9 -14   6   69.59    5.84
   9  14  -6   63.23    5.43
 -10 -14   6   85.31    5.89
  10  14  -6   72.02    5.74
 -11 -14   6  226.30    9.46
  11  14  -6  185.66    8.12
 -12 -14   6    3.72    4.50
  12  14  -6   -2.59    4.19
   7 -15   6   35.16    4.91
  -7  15  -6   40.33    4.39
   6 -15   6  237.93    9.62
  -6  15  -6  220.20    9.05
   5 -15   6  851.52   28.75
  -5  15  -6  834.46   28.18
   4 -15   6  123.10    6.62
  -4  15  -6  118.40    6.72
   3 -15   6  183.59    8.38
  -3  15  -6  174.65    7.91
   2 -15   6   23.63    4.91
  -2  15  -6   30.92    4.55
   1 -15   6  114.83    6.72
  -1  15  -6  114.78    6.41
   0 -15   6   88.72    6.26
   0  15  -6   94.35    5.95
  -1 -15   6   -3.31    4.81
   1  15  -6    2.79    4.14
  -2 -15   6  330.42   12.77
   2  15  -6  332.54   12.62
  -3 -15   6 1869.00   61.83
   3  15  -6 1718.55   56.92
  -4 -15   6 3991.33  130.49
   4  15  -6 4293.78  140.32
  -5 -15   6 1148.80   38.57
   5  15  -6 1130.19   37.90
  -6 -15   6  159.70    7.60
   6  15  -6  155.36    7.60
  -7 -15   6   85.00    6.10
[truncated: 333,427 more chars]
