# Supplementary material
Source: MDPI journal article supplement (https://www.mdpi.com/2304-6740/5/3/51)
Supplement: s1 [file s1 › inorganics-207671-supplementary/3.cif]

data_ld9

_audit_update_record
;
2016-05-13 # Formatted by publCIF
;
_audit_creation_date              2016-05-06
_audit_creation_method
;
Olex2 1.2
(compiled 2015.09.30 svn.r3233 for OlexSys, GUI svn.r5103)
;
_publ_contact_author_address      ?
_publ_contact_author_email        ?
_publ_contact_author_name         ''
_publ_contact_author_phone        ?
_publ_section_references
;
Dolomanov, O. V., Bourhis, L. J., Gildea, R. J., Howard, J. A. K. & Puschmann,
H. (2009). <i>J. Appl. Cryst.</i> <b>42</b>, 339--341.

Sheldrick, G. M. (2015). <i>Acta Cryst.</i> A<b>71</b>, 3--8.

Sheldrick, G. M. (2015). <i>Acta Cryst.</i> C<b>71</b>, 3--8.
;
_chemical_name_common             ?
_chemical_name_systematic         ?
_chemical_formula_moiety          'C26 H38 Fe N4 O4, N O3'
_chemical_formula_sum             'C26 H38 Fe N5 O7'
_chemical_formula_weight          588.45
_chemical_melting_point           ?
loop_
  _atom_type_symbol
  _atom_type_description
  _atom_type_scat_dispersion_real
  _atom_type_scat_dispersion_imag
  _atom_type_scat_source
 'C' 'C' 0.0033 0.0016 'International Tables Vol C Tables 4.2.6.8 and 6.1.1.4'
 'H' 'H' 0.0000 0.0000 'International Tables Vol C Tables 4.2.6.8 and 6.1.1.4'
 'N' 'N' 0.0061 0.0033 'International Tables Vol C Tables 4.2.6.8 and 6.1.1.4'
 'O' 'O' 0.0106 0.0060 'International Tables Vol C Tables 4.2.6.8 and 6.1.1.4'
 'Fe' 'Fe' 0.3463 0.8444 'International Tables Vol C Tables 4.2.6.8 and 6.1.1.4'

_shelx_space_group_comment
;
The symmetry employed for this shelxl refinement is uniquely defined
by the following loop, which should always be used as a source of
symmetry information in preference to the above space-group names.
They are only intended as comments.
;
_space_group_crystal_system       triclinic
_space_group_IT_number            2
_space_group_name_H-M_alt         'P -1'
_space_group_name_Hall            '-P 1'
loop_
  _space_group_symop_operation_xyz
 'x, y, z'
 '-x, -y, -z'

_cell_length_a                    9.6460(19)
_cell_length_b                    10.632(2)
_cell_length_c                    14.242(3)
_cell_angle_alpha                 100.25(3)
_cell_angle_beta                  105.21(3)
_cell_angle_gamma                 102.93(3)
_cell_volume                      1329.5(5)
_cell_formula_units_Z             2
_cell_measurement_reflns_used     6447
_cell_measurement_temperature     100.15
_cell_measurement_theta_max       27.50
_cell_measurement_theta_min       0.985
_shelx_estimated_absorpt_T_max    0.997
_shelx_estimated_absorpt_T_min    0.970
_exptl_absorpt_coefficient_mu     0.622
_exptl_absorpt_correction_T_max   0.9969
_exptl_absorpt_correction_T_min   0.9695
_exptl_absorpt_correction_type    multi-scan
_exptl_absorpt_process_details    'XScale within XDS'
_exptl_absorpt_special_details    ?
_exptl_crystal_colour             'clear brownish blue'
_exptl_crystal_colour_lustre      clear
_exptl_crystal_colour_modifier    brownish
_exptl_crystal_colour_primary     blue
_exptl_crystal_density_diffrn     1.465
_exptl_crystal_density_meas       ?
_exptl_crystal_density_method     ?
_exptl_crystal_description        plate
_exptl_crystal_F_000              618
_exptl_crystal_size_max           0.05
_exptl_crystal_size_mid           0.01
_exptl_crystal_size_min           0.005
_exptl_transmission_factor_max    ?
_exptl_transmission_factor_min    ?
_diffrn_reflns_av_R_equivalents   0.0792
_diffrn_reflns_av_unetI/netI      0.0536
_diffrn_reflns_Laue_measured_fraction_full 0.985
_diffrn_reflns_Laue_measured_fraction_max 0.982
_diffrn_reflns_limit_h_max        12
_diffrn_reflns_limit_h_min        -12
_diffrn_reflns_limit_k_max        13
_diffrn_reflns_limit_k_min        -13
_diffrn_reflns_limit_l_max        18
_diffrn_reflns_limit_l_min        -18
_diffrn_reflns_number             24637
_diffrn_reflns_point_group_measured_fraction_full 0.985
_diffrn_reflns_point_group_measured_fraction_max 0.982
_diffrn_reflns_theta_full         27.500
_diffrn_reflns_theta_max          27.875
_diffrn_reflns_theta_min          1.531
_diffrn_ambient_temperature       100.15
_diffrn_detector_area_resol_mean  ?
_diffrn_measured_fraction_theta_full 0.985
_diffrn_measured_fraction_theta_max 0.982
_diffrn_measurement_device_type   'ADSC Quantum 210r'
_diffrn_measurement_method        'Phi Scan'
_diffrn_radiation_monochromator   'Silicon Double Crystal'
_diffrn_radiation_type            Synchrotron
_diffrn_radiation_source          'Australian Synchrotron'
_diffrn_radiation_wavelength      0.71073
_diffrn_standards_number          0
_reflns_Friedel_coverage          0.000
_reflns_Friedel_fraction_full     .
_reflns_Friedel_fraction_max      .
_reflns_number_gt                 5449
_reflns_number_total              6224
_reflns_special_details
;
 Reflections were merged by SHELXL according to the crystal
 class for the calculation of statistics and refinement.
 
 _reflns_Friedel_fraction is defined as the number of unique
 Friedel pairs measured divided by the number that would be
 possible theoretically, ignoring centric projections and
 systematic absences.
;
_reflns_threshold_expression      'I > 2\s(I)'
_computing_cell_refinement        'XDS (Kabsch, 1993)'
_computing_data_collection        'BluIce (McPhillips, 2002)'
_computing_data_reduction         'XDS (Kabsch, 1993)'
_computing_molecular_graphics     'X-SEED'
_computing_publication_material   'XCIF V6.12 (BrukerAXS, 2001).'
_computing_structure_refinement   'ShelXL (Sheldrick, 2015)'
_computing_structure_solution     'ShelXT (Sheldrick, 2015)'
_refine_diff_density_max          0.670
_refine_diff_density_min          -0.875
_refine_diff_density_rms          0.082
_refine_ls_extinction_coef        .
_refine_ls_extinction_method      none
_refine_ls_goodness_of_fit_ref    1.017
_refine_ls_hydrogen_treatment     mixed
_refine_ls_matrix_type            full
_refine_ls_number_parameters      364
_refine_ls_number_reflns          6224
_refine_ls_number_restraints      0
_refine_ls_R_factor_all           0.0488
_refine_ls_R_factor_gt            0.0419
_refine_ls_restrained_S_all       1.017
_refine_ls_shift/su_max           0.001
_refine_ls_shift/su_mean          0.000
_refine_ls_structure_factor_coef  Fsqd
_refine_ls_weighting_details
'w=1/[\s^2^(Fo^2^)+(0.0529P)^2^+1.1389P] where P=(Fo^2^+2Fc^2^)/3'
_refine_ls_weighting_scheme       calc
_refine_ls_wR_factor_gt           0.1072
_refine_ls_wR_factor_ref          0.1111
_refine_special_details           ?
_olex2_refinement_description
;
1. Fixed Uiso
 At 1.2 times of:
  All C(H) groups, All C(H,H) groups
 At 1.5 times of:
  All C(H,H,H) groups
2.a Secondary CH2 refined with riding coordinates:
 C10(H10A,H10B), C11(H11A,H11B), C2(H2A,H2B), C12(H12A,H12B), C25(H25A,H25B),
 C24(H24A,H24B), C23(H23A,H23B), C15(H15A,H15B)
2.b Aromatic/amide H refined with riding coordinates:
 C9(H9), C17(H17), C19(H19), C22(H22), C6(H6), C5(H5), C4(H4), C18(H18)
2.c Idealised Me refined as rotating group:
 C14(H14A,H14B,H14C), C13(H13A,H13B,H13C), C26(H26A,H26B,H26C), C1(H1A,H1B,H1C)
;
_atom_sites_solution_hydrogens    mixed
_atom_sites_solution_primary      ?
_atom_sites_solution_secondary    ?
loop_
  _atom_site_label
  _atom_site_type_symbol
  _atom_site_fract_x
  _atom_site_fract_y
  _atom_site_fract_z
  _atom_site_U_iso_or_equiv
  _atom_site_adp_type
  _atom_site_occupancy
  _atom_site_site_symmetry_order
  _atom_site_calc_flag
  _atom_site_refinement_flags_posn
  _atom_site_refinement_flags_adp
  _atom_site_refinement_flags_occupancy
  _atom_site_disorder_assembly
  _atom_site_disorder_group
 Fe1 Fe 0.42981(3) 0.72495(2) 0.23953(2) 0.01247(9) Uani 1 1 d . . . . .
 O2 O 0.25173(15) 0.66529(13) 0.26927(10) 0.0162(3) Uani 1 1 d . . . . .
 O1 O 0.01157(16) 0.53382(14) 0.29671(10) 0.0187(3) Uani 1 1 d . . . . .
 O3 O 0.72795(16) 0.73365(13) 0.54569(10) 0.0172(3) Uani 1 1 d . . . . .
 O4 O 0.55503(15) 0.71086(13) 0.36140(9) 0.0154(3) Uani 1 1 d . . . . .
 N4 N 0.39513(18) 0.54230(16) 0.17117(11) 0.0158(3) Uani 1 1 d . . . . .
 N2 N 0.61773(18) 0.79785(16) 0.20350(12) 0.0156(3) Uani 1 1 d . . . . .
 O5 O 0.50521(19) 0.74655(17) -0.02266(12) 0.0307(4) Uani 1 1 d . . . . .
 N1 N 0.46380(18) 0.90797(15) 0.30760(11) 0.0150(3) Uani 1 1 d . . . . .
 O7 O 0.6075(2) 0.86830(17) -0.10704(12) 0.0356(4) Uani 1 1 d . . . . .
 N3 N 0.29851(19) 0.73502(16) 0.10291(12) 0.0170(3) Uani 1 1 d . . . . .
 C21 C 0.5741(2) 0.59953(18) 0.38403(13) 0.0148(3) Uani 1 1 d . . . . .
 O6 O 0.6332(3) 0.95325(19) 0.04923(13) 0.0436(5) Uani 1 1 d . . . . .
 C10 C 0.5833(2) 1.00100(18) 0.28770(14) 0.0173(4) Uani 1 1 d . . . . .
 H10A H 0.6292 1.0820 0.3441 0.021 Uiso 1 1 calc R . . . .
 H10B H 0.5428 1.0278 0.2254 0.021 Uiso 1 1 calc R . . . .
 C20 C 0.5115(2) 0.47105(18) 0.31634(14) 0.0158(3) Uani 1 1 d . . . . .
 C16 C 0.6672(2) 0.60778(18) 0.48271(14) 0.0156(3) Uani 1 1 d . . . . .
 N5 N 0.5808(2) 0.8566(2) -0.02782(14) 0.0282(4) Uani 1 1 d . . . . .
 C11 C 0.6989(2) 0.92815(18) 0.27637(14) 0.0174(4) Uani 1 1 d . . . . .
 H11A H 0.7738 0.9804 0.2515 0.021 Uiso 1 1 calc R . . . .
 H11B H 0.7517 0.9151 0.3420 0.021 Uiso 1 1 calc R . . . .
 C8 C 0.2071(2) 0.73134(19) 0.33714(13) 0.0151(3) Uani 1 1 d . . . . .
 C9 C 0.3991(2) 0.94892(18) 0.37055(13) 0.0156(3) Uani 1 1 d . . . . .
 H9 H 0.4357 1.0402 0.4063 0.019 Uiso 1 1 calc R . . . .
 C17 C 0.6923(2) 0.49403(19) 0.51018(14) 0.0179(4) Uani 1 1 d . . . . .
 H17 H 0.7552 0.5016 0.5758 0.021 Uiso 1 1 calc R . . . .
 C7 C 0.2753(2) 0.86634(18) 0.39078(13) 0.0152(3) Uani 1 1 d . . . . .
 C2 C -0.1128(2) 0.45341(19) 0.31672(15) 0.0196(4) Uani 1 1 d . . . . .
 H2A H -0.1885 0.5021 0.3196 0.024 Uiso 1 1 calc R . . . .
 H2B H -0.0786 0.4311 0.3819 0.024 Uiso 1 1 calc R . . . .
 C19 C 0.5378(2) 0.35659(18) 0.34712(14) 0.0176(4) Uani 1 1 d . . . . .
 H19 H 0.4937 0.2712 0.3012 0.021 Uiso 1 1 calc R . . . .
 C12 C 0.7131(2) 0.70680(19) 0.19803(14) 0.0182(4) Uani 1 1 d . . . . .
 H12A H 0.6527 0.6226 0.1472 0.022 Uiso 1 1 calc R . . . .
 H12B H 0.7439 0.6852 0.2638 0.022 Uiso 1 1 calc R . . . .
 C22 C 0.4267(2) 0.44995(18) 0.21270(14) 0.0168(4) Uani 1 1 d . . . . .
 H22 H 0.3914 0.3612 0.1718 0.020 Uiso 1 1 calc R . . . .
 C25 C 0.2042(2) 0.8280(2) 0.10894(14) 0.0196(4) Uani 1 1 d . . . . .
 H25A H 0.2710 0.9196 0.1414 0.024 Uiso 1 1 calc R . . . .
 H25B H 0.1430 0.8039 0.1525 0.024 Uiso 1 1 calc R . . . .
 C3 C 0.0760(2) 0.66059(18) 0.35589(13) 0.0159(3) Uani 1 1 d . . . . .
 C6 C 0.2164(2) 0.92749(19) 0.46207(14) 0.0184(4) Uani 1 1 d . . . . .
 H6 H 0.2616 1.0187 0.4968 0.022 Uiso 1 1 calc R . . . .
 C24 C 0.2084(2) 0.59534(19) 0.05014(14) 0.0192(4) Uani 1 1 d . . . . .
 H24A H 0.1620 0.5880 -0.0221 0.023 Uiso 1 1 calc R . . . .
 H24B H 0.1277 0.5667 0.0793 0.023 Uiso 1 1 calc R . . . .
 C5 C 0.0942(2) 0.8553(2) 0.48113(14) 0.0198(4) Uani 1 1 d . . . . .
 H5 H 0.0571 0.8962 0.5304 0.024 Uiso 1 1 calc R . . . .
 C23 C 0.3135(2) 0.50942(19) 0.06328(14) 0.0203(4) Uani 1 1 d . . . . .
 H23A H 0.2563 0.4139 0.0390 0.024 Uiso 1 1 calc R . . . .
 H23B H 0.3842 0.5281 0.0248 0.024 Uiso 1 1 calc R . . . .
 C15 C 0.8282(2) 0.7417(2) 0.64266(14) 0.0202(4) Uani 1 1 d . . . . .
 H15A H 0.9179 0.7160 0.6348 0.024 Uiso 1 1 calc R . . . .
 H15B H 0.7777 0.6797 0.6757 0.024 Uiso 1 1 calc R . . . .
 C4 C 0.0238(2) 0.7214(2) 0.42829(14) 0.0181(4) Uani 1 1 d . . . . .
 H4 H -0.0602 0.6723 0.4423 0.022 Uiso 1 1 calc R . . . .
 C18 C 0.6261(2) 0.36803(19) 0.44241(15) 0.0189(4) Uani 1 1 d . . . . .
 H18 H 0.6425 0.2907 0.4627 0.023 Uiso 1 1 calc R . . . .
 C14 C 0.8740(3) 0.8825(2) 0.70594(16) 0.0260(4) Uani 1 1 d . . . . .
 H14A H 0.9174 0.9439 0.6706 0.039 Uiso 1 1 calc GR . . . .
 H14B H 0.9485 0.8908 0.7703 0.039 Uiso 1 1 calc GR . . . .
 H14C H 0.7859 0.9046 0.7182 0.039 Uiso 1 1 calc GR . . . .
 C13 C 0.8527(2) 0.7629(2) 0.17124(15) 0.0214(4) Uani 1 1 d . . . . .
 H13A H 0.8246 0.7942 0.1102 0.032 Uiso 1 1 calc GR . . . .
 H13B H 0.9021 0.6932 0.1596 0.032 Uiso 1 1 calc GR . . . .
 H13C H 0.9216 0.8376 0.2267 0.032 Uiso 1 1 calc GR . . . .
 C26 C 0.1002(3) 0.8275(2) 0.00782(16) 0.0278(5) Uani 1 1 d . . . . .
 H26A H 0.1591 0.8479 -0.0369 0.042 Uiso 1 1 calc GR . . . .
 H26B H 0.0473 0.8951 0.0176 0.042 Uiso 1 1 calc GR . . . .
 H26C H 0.0272 0.7395 -0.0223 0.042 Uiso 1 1 calc GR . . . .
 C1 C -0.1795(2) 0.3279(2) 0.23217(16) 0.0242(4) Uani 1 1 d . . . . .
 H1A H -0.2247 0.3501 0.1695 0.036 Uiso 1 1 calc GR . . . .
 H1B H -0.2565 0.2654 0.2477 0.036 Uiso 1 1 calc GR . . . .
 H1C H -0.1005 0.2867 0.2245 0.036 Uiso 1 1 calc GR . . . .
 H3 H 0.358(3) 0.765(2) 0.0661(18) 0.017(6) Uiso 1 1 d . . . . .
 H2 H 0.590(3) 0.814(3) 0.141(2) 0.039(8) Uiso 1 1 d . . . . .

loop_
  _atom_site_aniso_label
  _atom_site_aniso_U_11
  _atom_site_aniso_U_22
  _atom_site_aniso_U_33
  _atom_site_aniso_U_23
  _atom_site_aniso_U_13
  _atom_site_aniso_U_12
 Fe1 0.01303(14) 0.01135(13) 0.01103(13) 0.00046(9) 0.00312(10) 0.00224(9)
 O2 0.0174(7) 0.0146(6) 0.0146(6) -0.0006(5) 0.0063(5) 0.0023(5)
 O1 0.0170(7) 0.0175(7) 0.0181(6) 0.0001(5) 0.0072(5) -0.0003(5)
 O3 0.0191(7) 0.0136(6) 0.0135(6) 0.0000(5) 0.0001(5) 0.0027(5)
 O4 0.0188(7) 0.0119(6) 0.0136(6) 0.0015(5) 0.0039(5) 0.0033(5)
 N4 0.0152(8) 0.0162(7) 0.0135(7) 0.0000(6) 0.0044(6) 0.0027(6)
 N2 0.0150(8) 0.0149(7) 0.0141(7) -0.0002(6) 0.0034(6) 0.0031(6)
 O5 0.0324(9) 0.0340(9) 0.0259(8) 0.0097(7) 0.0122(7) 0.0042(7)
 N1 0.0161(8) 0.0132(7) 0.0142(7) 0.0028(5) 0.0036(6) 0.0030(6)
 O7 0.0573(12) 0.0293(9) 0.0224(8) 0.0078(6) 0.0193(8) 0.0075(8)
 N3 0.0170(8) 0.0174(8) 0.0142(7) 0.0019(6) 0.0039(6) 0.0027(6)
 C21 0.0162(9) 0.0136(8) 0.0154(8) 0.0034(6) 0.0065(7) 0.0042(7)
 O6 0.0702(14) 0.0320(9) 0.0230(8) 0.0007(7) 0.0113(9) 0.0127(9)
 C10 0.0189(9) 0.0122(8) 0.0190(8) 0.0023(6) 0.0067(7) 0.0013(7)
 C20 0.0173(9) 0.0141(8) 0.0160(8) 0.0026(7) 0.0065(7) 0.0040(7)
 C16 0.0165(9) 0.0127(8) 0.0158(8) 0.0007(6) 0.0058(7) 0.0022(7)
 N5 0.0399(11) 0.0278(10) 0.0205(8) 0.0075(7) 0.0110(8) 0.0140(8)
 C11 0.0159(9) 0.0143(8) 0.0177(8) 0.0000(7) 0.0047(7) 0.0000(7)
 C8 0.0152(9) 0.0179(9) 0.0122(7) 0.0033(6) 0.0041(7) 0.0051(7)
 C9 0.0189(9) 0.0118(8) 0.0140(8) 0.0007(6) 0.0031(7) 0.0048(7)
 C17 0.0194(9) 0.0168(9) 0.0168(8) 0.0036(7) 0.0045(7) 0.0060(7)
 C7 0.0169(9) 0.0161(8) 0.0122(7) 0.0022(6) 0.0041(7) 0.0054(7)
 C2 0.0177(9) 0.0173(9) 0.0234(9) 0.0040(7) 0.0094(8) 0.0019(7)
 C19 0.0196(9) 0.0129(8) 0.0196(8) 0.0021(7) 0.0071(7) 0.0037(7)
 C12 0.0165(9) 0.0168(9) 0.0200(9) 0.0004(7) 0.0064(7) 0.0047(7)
 C22 0.0199(9) 0.0119(8) 0.0169(8) -0.0007(6) 0.0073(7) 0.0025(7)
 C25 0.0190(10) 0.0219(9) 0.0187(9) 0.0052(7) 0.0048(8) 0.0084(7)
 C3 0.0161(9) 0.0157(8) 0.0136(8) 0.0009(6) 0.0038(7) 0.0035(7)
 C6 0.0215(10) 0.0175(9) 0.0154(8) 0.0010(7) 0.0058(7) 0.0062(7)
 C24 0.0180(9) 0.0180(9) 0.0150(8) 0.0002(7) 0.0000(7) 0.0014(7)
 C5 0.0218(10) 0.0219(9) 0.0162(8) 0.0012(7) 0.0081(8) 0.0079(8)
 C23 0.0250(10) 0.0170(9) 0.0131(8) -0.0019(7) 0.0023(7) 0.0034(7)
 C15 0.0212(10) 0.0195(9) 0.0151(8) 0.0018(7) 0.0000(7) 0.0053(7)
 C4 0.0153(9) 0.0220(9) 0.0169(8) 0.0038(7) 0.0065(7) 0.0046(7)
 C18 0.0234(10) 0.0141(8) 0.0210(9) 0.0048(7) 0.0081(8) 0.0069(7)
 C14 0.0285(11) 0.0205(10) 0.0198(9) -0.0014(8) -0.0024(8) 0.0062(8)
 C13 0.0169(9) 0.0228(10) 0.0220(9) 0.0003(7) 0.0073(8) 0.0037(7)
 C26 0.0283(12) 0.0319(11) 0.0230(10) 0.0079(8) 0.0035(9) 0.0128(9)
 C1 0.0214(10) 0.0208(10) 0.0246(10) 0.0002(8) 0.0065(8) 0.0000(8)

_geom_special_details
;
 All esds (except the esd in the dihedral angle between two l.s. planes)
 are estimated using the full covariance matrix.  The cell esds are taken
 into account individually in the estimation of esds in distances, angles
 and torsion angles; correlations between esds in cell parameters are only
 used when they are defined by crystal symmetry.  An approximate (isotropic)
 treatment of cell esds is used for estimating esds involving l.s. planes.
;
loop_
  _geom_bond_atom_site_label_1
  _geom_bond_atom_site_label_2
  _geom_bond_distance
  _geom_bond_site_symmetry_2
  _geom_bond_publ_flag
 Fe1 O2 1.8767(14) . ?
 Fe1 O4 1.8886(15) . ?
 Fe1 N4 1.9226(17) . ?
 Fe1 N2 2.0374(17) . ?
 Fe1 N1 1.9262(17) . ?
 Fe1 N3 2.0598(18) . ?
 O2 C8 1.314(2) . ?
 O1 C2 1.435(2) . ?
 O1 C3 1.364(2) . ?
 O3 C16 1.373(2) . ?
 O3 C15 1.439(2) . ?
 O4 C21 1.319(2) . ?
 N4 C22 1.285(3) . ?
 N4 C23 1.468(2) . ?
 N2 C11 1.478(2) . ?
 N2 C12 1.483(2) . ?
 N2 H2 0.92(3) . ?
 O5 N5 1.258(3) . ?
 N1 C10 1.466(2) . ?
 N1 C9 1.288(2) . ?
 O7 N5 1.242(2) . ?
 N3 C25 1.491(3) . ?
 N3 C24 1.486(2) . ?
 N3 H3 0.92(2) . ?
 C21 C20 1.420(3) . ?
 C21 C16 1.431(3) . ?
 O6 N5 1.261(3) . ?
 C10 H10A 0.9900 . ?
 C10 H10B 0.9900 . ?
 C10 C11 1.518(3) . ?
 C20 C19 1.417(3) . ?
 C20 C22 1.437(3) . ?
 C16 C17 1.387(3) . ?
 C11 H11A 0.9900 . ?
 C11 H11B 0.9900 . ?
 C8 C7 1.414(3) . ?
 C8 C3 1.435(3) . ?
 C9 H9 0.9500 . ?
 C9 C7 1.443(3) . ?
 C17 H17 0.9500 . ?
 C17 C18 1.403(3) . ?
 C7 C6 1.417(2) . ?
 C2 H2A 0.9900 . ?
 C2 H2B 0.9900 . ?
 C2 C1 1.511(3) . ?
 C19 H19 0.9500 . ?
 C19 C18 1.368(3) . ?
 C12 H12A 0.9900 . ?
 C12 H12B 0.9900 . ?
 C12 C13 1.518(3) . ?
 C22 H22 0.9500 . ?
 C25 H25A 0.9900 . ?
 C25 H25B 0.9900 . ?
 C25 C26 1.523(3) . ?
 C3 C4 1.384(3) . ?
 C6 H6 0.9500 . ?
 C6 C5 1.375(3) . ?
 C24 H24A 0.9900 . ?
 C24 H24B 0.9900 . ?
 C24 C23 1.507(3) . ?
 C5 H5 0.9500 . ?
 C5 C4 1.404(3) . ?
 C23 H23A 0.9900 . ?
 C23 H23B 0.9900 . ?
 C15 H15A 0.9900 . ?
 C15 H15B 0.9900 . ?
 C15 C14 1.505(3) . ?
 C4 H4 0.9500 . ?
 C18 H18 0.9500 . ?
 C14 H14A 0.9800 . ?
 C14 H14B 0.9800 . ?
 C14 H14C 0.9800 . ?
 C13 H13A 0.9800 . ?
 C13 H13B 0.9800 . ?
 C13 H13C 0.9800 . ?
 C26 H26A 0.9800 . ?
 C26 H26B 0.9800 . ?
 C26 H26C 0.9800 . ?
 C1 H1A 0.9800 . ?
 C1 H1B 0.9800 . ?
 C1 H1C 0.9800 . ?

loop_
  _geom_angle_atom_site_label_1
  _geom_angle_atom_site_label_2
  _geom_angle_atom_site_label_3
  _geom_angle
  _geom_angle_site_symmetry_1
  _geom_angle_site_symmetry_3
  _geom_angle_publ_flag
 O2 Fe1 O4 94.46(6) . . ?
 O2 Fe1 N4 86.26(7) . . ?
 O2 Fe1 N2 176.53(6) . . ?
 O2 Fe1 N1 93.63(7) . . ?
 O2 Fe1 N3 87.31(7) . . ?
 O4 Fe1 N4 94.02(7) . . ?
 O4 Fe1 N2 88.24(7) . . ?
 O4 Fe1 N1 86.20(7) . . ?
 O4 Fe1 N3 177.19(6) . . ?
 N4 Fe1 N2 95.73(7) . . ?
 N4 Fe1 N1 179.76(8) . . ?
 N4 Fe1 N3 83.91(8) . . ?
 N2 Fe1 N3 90.07(7) . . ?
 N1 Fe1 N2 84.36(7) . . ?
 N1 Fe1 N3 95.86(7) . . ?
 C8 O2 Fe1 126.10(12) . . ?
 C3 O1 C2 117.34(15) . . ?
 C16 O3 C15 115.05(15) . . ?
 C21 O4 Fe1 126.24(12) . . ?
 C22 N4 Fe1 125.98(13) . . ?
 C22 N4 C23 119.92(16) . . ?
 C23 N4 Fe1 113.88(13) . . ?
 Fe1 N2 H2 108.7(19) . . ?
 C11 N2 Fe1 106.54(11) . . ?
 C11 N2 C12 112.93(15) . . ?
 C11 N2 H2 107(2) . . ?
 C12 N2 Fe1 114.95(12) . . ?
 C12 N2 H2 106(2) . . ?
 C10 N1 Fe1 113.18(12) . . ?
 C9 N1 Fe1 125.71(13) . . ?
 C9 N1 C10 120.93(16) . . ?
 Fe1 N3 H3 109.8(15) . . ?
 C25 N3 Fe1 114.97(12) . . ?
 C25 N3 H3 105.4(15) . . ?
 C24 N3 Fe1 105.37(12) . . ?
 C24 N3 C25 112.73(16) . . ?
 C24 N3 H3 108.4(15) . . ?
 O4 C21 C20 124.62(17) . . ?
 O4 C21 C16 118.32(16) . . ?
 C20 C21 C16 117.04(17) . . ?
 N1 C10 H10A 110.4 . . ?
 N1 C10 H10B 110.4 . . ?
 N1 C10 C11 106.68(15) . . ?
 H10A C10 H10B 108.6 . . ?
 C11 C10 H10A 110.4 . . ?
 C11 C10 H10B 110.4 . . ?
 C21 C20 C22 122.79(17) . . ?
 C19 C20 C21 120.83(17) . . ?
 C19 C20 C22 116.28(17) . . ?
 O3 C16 C21 115.56(16) . . ?
 O3 C16 C17 123.71(17) . . ?
 C17 C16 C21 120.73(17) . . ?
 O5 N5 O6 119.23(18) . . ?
 O7 N5 O5 120.20(19) . . ?
 O7 N5 O6 120.5(2) . . ?
 N2 C11 C10 107.26(15) . . ?
 N2 C11 H11A 110.3 . . ?
 N2 C11 H11B 110.3 . . ?
 C10 C11 H11A 110.3 . . ?
 C10 C11 H11B 110.3 . . ?
 H11A C11 H11B 108.5 . . ?
 O2 C8 C7 125.36(17) . . ?
 O2 C8 C3 116.73(16) . . ?
 C7 C8 C3 117.89(16) . . ?
 N1 C9 H9 117.6 . . ?
 N1 C9 C7 124.81(17) . . ?
 C7 C9 H9 117.6 . . ?
 C16 C17 H17 119.5 . . ?
 C16 C17 C18 120.94(18) . . ?
 C18 C17 H17 119.5 . . ?
 C8 C7 C9 121.87(16) . . ?
 C8 C7 C6 120.35(17) . . ?
 C6 C7 C9 117.64(17) . . ?
 O1 C2 H2A 110.3 . . ?
 O1 C2 H2B 110.3 . . ?
 O1 C2 C1 107.21(15) . . ?
 H2A C2 H2B 108.5 . . ?
 C1 C2 H2A 110.3 . . ?
 C1 C2 H2B 110.3 . . ?
 C20 C19 H19 119.7 . . ?
 C18 C19 C20 120.52(18) . . ?
 C18 C19 H19 119.7 . . ?
 N2 C12 H12A 108.7 . . ?
 N2 C12 H12B 108.7 . . ?
 N2 C12 C13 114.18(16) . . ?
 H12A C12 H12B 107.6 . . ?
 C13 C12 H12A 108.7 . . ?
 C13 C12 H12B 108.7 . . ?
 N4 C22 C20 124.85(17) . . ?
 N4 C22 H22 117.6 . . ?
 C20 C22 H22 117.6 . . ?
 N3 C25 H25A 108.7 . . ?
 N3 C25 H25B 108.7 . . ?
 N3 C25 C26 114.39(16) . . ?
 H25A C25 H25B 107.6 . . ?
 C26 C25 H25A 108.7 . . ?
 C26 C25 H25B 108.7 . . ?
 O1 C3 C8 114.26(16) . . ?
 O1 C3 C4 125.22(17) . . ?
 C4 C3 C8 120.52(17) . . ?
 C7 C6 H6 119.9 . . ?
 C5 C6 C7 120.25(18) . . ?
 C5 C6 H6 119.9 . . ?
 N3 C24 H24A 110.3 . . ?
 N3 C24 H24B 110.3 . . ?
 N3 C24 C23 107.23(16) . . ?
 H24A C24 H24B 108.5 . . ?
 C23 C24 H24A 110.3 . . ?
 C23 C24 H24B 110.3 . . ?
 C6 C5 H5 119.8 . . ?
 C6 C5 C4 120.45(17) . . ?
 C4 C5 H5 119.8 . . ?
 N4 C23 C24 106.79(15) . . ?
 N4 C23 H23A 110.4 . . ?
 N4 C23 H23B 110.4 . . ?
 C24 C23 H23A 110.4 . . ?
 C24 C23 H23B 110.4 . . ?
 H23A C23 H23B 108.6 . . ?
 O3 C15 H15A 109.9 . . ?
 O3 C15 H15B 109.9 . . ?
 O3 C15 C14 108.77(16) . . ?
 H15A C15 H15B 108.3 . . ?
 C14 C15 H15A 109.9 . . ?
 C14 C15 H15B 109.9 . . ?
 C3 C4 C5 120.45(18) . . ?
 C3 C4 H4 119.8 . . ?
 C5 C4 H4 119.8 . . ?
 C17 C18 H18 120.0 . . ?
 C19 C18 C17 119.91(18) . . ?
 C19 C18 H18 120.0 . . ?
 C15 C14 H14A 109.5 . . ?
 C15 C14 H14B 109.5 . . ?
 C15 C14 H14C 109.5 . . ?
 H14A C14 H14B 109.5 . . ?
 H14A C14 H14C 109.5 . . ?
 H14B C14 H14C 109.5 . . ?
 C12 C13 H13A 109.5 . . ?
 C12 C13 H13B 109.5 . . ?
 C12 C13 H13C 109.5 . . ?
 H13A C13 H13B 109.5 . . ?
 H13A C13 H13C 109.5 . . ?
 H13B C13 H13C 109.5 . . ?
 C25 C26 H26A 109.5 . . ?
 C25 C26 H26B 109.5 . . ?
 C25 C26 H26C 109.5 . . ?
 H26A C26 H26B 109.5 . . ?
 H26A C26 H26C 109.5 . . ?
 H26B C26 H26C 109.5 . . ?
 C2 C1 H1A 109.5 . . ?
 C2 C1 H1B 109.5 . . ?
 C2 C1 H1C 109.5 . . ?
 H1A C1 H1B 109.5 . . ?
 H1A C1 H1C 109.5 . . ?
 H1B C1 H1C 109.5 . . ?

_shelx_res_file
;
    ld9.res created by SHELXL-2014/7

TITL ld9_a.res in P-1
CELL 0.71073 9.646 10.632 14.242 100.246 105.215 102.929
ZERR 2 0.0019 0.0021 0.0028 0.03 0.03 0.03
LATT 1
SFAC C H N O Fe
UNIT 52 72 10 14 2

L.S. 20
PLAN  20
SIZE 0.05 0.01 0.005
TEMP -173
GRID
BOND $H
HTAB
fmap 2
acta 55
MERG 2
REM <olex2.extras>
REM <HklSrc "%.\\LD9.hkl">
REM </olex2.extras>

WGHT    0.052900    1.138900
FVAR       1.00209
FE1   5    0.429811    0.724954    0.239531    11.00000    0.01303    0.01135 =
         0.01103    0.00046    0.00312    0.00224
O2    4    0.251734    0.665294    0.269268    11.00000    0.01738    0.01459 =
         0.01459   -0.00056    0.00627    0.00229
O1    4    0.011567    0.533821    0.296714    11.00000    0.01700    0.01755 =
         0.01812    0.00005    0.00719   -0.00033
O3    4    0.727949    0.733650    0.545691    11.00000    0.01912    0.01358 =
         0.01346   -0.00002    0.00013    0.00266
O4    4    0.555029    0.710863    0.361400    11.00000    0.01877    0.01189 =
         0.01364    0.00145    0.00387    0.00335
N4    3    0.395127    0.542304    0.171174    11.00000    0.01522    0.01619 =
         0.01353    0.00004    0.00438    0.00267
N2    3    0.617733    0.797848    0.203503    11.00000    0.01503    0.01489 =
         0.01405   -0.00025    0.00337    0.00309
O5    4    0.505213    0.746548   -0.022661    11.00000    0.03235    0.03395 =
         0.02588    0.00974    0.01216    0.00424
N1    3    0.463797    0.907967    0.307605    11.00000    0.01610    0.01321 =
         0.01420    0.00277    0.00356    0.00295
O7    4    0.607543    0.868301   -0.107045    11.00000    0.05728    0.02926 =
         0.02244    0.00778    0.01933    0.00746
N3    3    0.298505    0.735016    0.102913    11.00000    0.01696    0.01738 =
         0.01419    0.00191    0.00387    0.00266
C21   1    0.574080    0.599535    0.384030    11.00000    0.01616    0.01357 =
         0.01535    0.00336    0.00652    0.00420
O6    4    0.633164    0.953253    0.049233    11.00000    0.07022    0.03201 =
         0.02295    0.00073    0.01129    0.01268
C10   1    0.583343    1.001003    0.287696    11.00000    0.01886    0.01220 =
         0.01901    0.00226    0.00670    0.00126
AFIX  23
H10A  2    0.629157    1.082034    0.344113    11.00000   -1.20000
H10B  2    0.542781    1.027807    0.225358    11.00000   -1.20000
AFIX   0
C20   1    0.511478    0.471047    0.316339    11.00000    0.01730    0.01409 =
         0.01602    0.00261    0.00646    0.00403
C16   1    0.667195    0.607776    0.482710    11.00000    0.01645    0.01270 =
         0.01578    0.00073    0.00579    0.00219

N5    3    0.580795    0.856589   -0.027821    11.00000    0.03993    0.02779 =
         0.02048    0.00749    0.01096    0.01396
C11   1    0.698872    0.928145    0.276373    11.00000    0.01589    0.01433 =
         0.01769   -0.00002    0.00474   -0.00001
AFIX  23
H11A  2    0.773801    0.980362    0.251543    11.00000   -1.20000
H11B  2    0.751661    0.915060    0.341988    11.00000   -1.20000
AFIX   0
C8    1    0.207073    0.731337    0.337136    11.00000    0.01520    0.01793 =
         0.01218    0.00326    0.00414    0.00511
C9    1    0.399141    0.948922    0.370552    11.00000    0.01893    0.01176 =
         0.01402    0.00072    0.00307    0.00480
AFIX  43
H9    2    0.435666    1.040217    0.406299    11.00000   -1.20000
AFIX   0
C17   1    0.692283    0.494029    0.510179    11.00000    0.01936    0.01684 =
         0.01685    0.00358    0.00451    0.00597
AFIX  43
H17   2    0.755204    0.501561    0.575817    11.00000   -1.20000
AFIX   0
C7    1    0.275288    0.866340    0.390785    11.00000    0.01693    0.01607 =
         0.01221    0.00218    0.00415    0.00535
C2    1   -0.112825    0.453413    0.316722    11.00000    0.01774    0.01734 =
         0.02343    0.00397    0.00943    0.00195
AFIX  23
H2A   2   -0.188501    0.502113    0.319642    11.00000   -1.20000
H2B   2   -0.078638    0.431074    0.381918    11.00000   -1.20000
AFIX   0
C19   1    0.537764    0.356591    0.347125    11.00000    0.01958    0.01293 =
         0.01960    0.00213    0.00708    0.00371
AFIX  43
H19   2    0.493702    0.271215    0.301212    11.00000   -1.20000
AFIX   0
C12   1    0.713139    0.706798    0.198028    11.00000    0.01647    0.01681 =
         0.01996    0.00038    0.00638    0.00467
AFIX  23
H12A  2    0.652705    0.622553    0.147217    11.00000   -1.20000
H12B  2    0.743877    0.685236    0.263845    11.00000   -1.20000
AFIX   0
C22   1    0.426697    0.449952    0.212696    11.00000    0.01986    0.01193 =
         0.01686   -0.00066    0.00731    0.00254
AFIX  43
H22   2    0.391351    0.361166    0.171824    11.00000   -1.20000
AFIX   0
C25   1    0.204232    0.827960    0.108941    11.00000    0.01897    0.02189 =
         0.01874    0.00517    0.00483    0.00837
AFIX  23
H25A  2    0.270978    0.919577    0.141433    11.00000   -1.20000
H25B  2    0.142998    0.803902    0.152490    11.00000   -1.20000
AFIX   0
C3    1    0.076014    0.660595    0.355893    11.00000    0.01613    0.01573 =
         0.01361    0.00094    0.00376    0.00351
C6    1    0.216421    0.927488    0.462067    11.00000    0.02149    0.01750 =
         0.01537    0.00104    0.00576    0.00620
AFIX  43
H6    2    0.261584    1.018721    0.496808    11.00000   -1.20000
AFIX   0
C24   1    0.208367    0.595339    0.050145    11.00000    0.01797    0.01804 =
         0.01503    0.00017    0.00001    0.00137
AFIX  23
H24A  2    0.161983    0.587964   -0.022145    11.00000   -1.20000
H24B  2    0.127687    0.566653    0.079328    11.00000   -1.20000
AFIX   0
C5    1    0.094188    0.855259    0.481129    11.00000    0.02184    0.02187 =
         0.01623    0.00116    0.00808    0.00792
AFIX  43
H5    2    0.057109    0.896210    0.530394    11.00000   -1.20000
AFIX   0
C23   1    0.313451    0.509421    0.063284    11.00000    0.02500    0.01702 =
         0.01308   -0.00191    0.00233    0.00344
AFIX  23
H23A  2    0.256321    0.413853    0.038999    11.00000   -1.20000
H23B  2    0.384203    0.528059    0.024790    11.00000   -1.20000
AFIX   0
C15   1    0.828227    0.741664    0.642655    11.00000    0.02121    0.01945 =
         0.01510    0.00185    0.00003    0.00532
AFIX  23
H15A  2    0.917891    0.716013    0.634839    11.00000   -1.20000
H15B  2    0.777657    0.679713    0.675691    11.00000   -1.20000
AFIX   0
C4    1    0.023811    0.721422    0.428293    11.00000    0.01534    0.02204 =
         0.01688    0.00377    0.00648    0.00456
AFIX  43
H4    2   -0.060210    0.672263    0.442319    11.00000   -1.20000
AFIX   0
C18   1    0.626066    0.368028    0.442414    11.00000    0.02339    0.01406 =
         0.02098    0.00475    0.00809    0.00686
AFIX  43
H18   2    0.642537    0.290744    0.462687    11.00000   -1.20000
AFIX   0
C14   1    0.874004    0.882510    0.705944    11.00000    0.02848    0.02049 =
         0.01985   -0.00138   -0.00242    0.00617
AFIX 137
H14A  2    0.917409    0.943860    0.670550    11.00000   -1.50000
H14B  2    0.948508    0.890835    0.770254    11.00000   -1.50000
H14C  2    0.785904    0.904551    0.718241    11.00000   -1.50000
AFIX   0
C13   1    0.852734    0.762917    0.171243    11.00000    0.01689    0.02281 =
         0.02204    0.00026    0.00728    0.00368
AFIX 137
H13A  2    0.824603    0.794222    0.110173    11.00000   -1.50000
H13B  2    0.902133    0.693168    0.159582    11.00000   -1.50000
H13C  2    0.921558    0.837578    0.226686    11.00000   -1.50000
AFIX   0
C26   1    0.100198    0.827549    0.007818    11.00000    0.02829    0.03186 =
         0.02299    0.00788    0.00352    0.01282
AFIX 137
H26A  2    0.159139    0.847862   -0.036937    11.00000   -1.50000
H26B  2    0.047306    0.895063    0.017561    11.00000   -1.50000
H26C  2    0.027191    0.739458   -0.022254    11.00000   -1.50000
AFIX   0
C1    1   -0.179477    0.327865    0.232167    11.00000    0.02143    0.02079 =
         0.02461    0.00015    0.00653   -0.00004
AFIX 137
H1A   2   -0.224675    0.350135    0.169476    11.00000   -1.50000
H1B   2   -0.256503    0.265352    0.247704    11.00000   -1.50000
H1C   2   -0.100481    0.286680    0.224480    11.00000   -1.50000
AFIX   0
H3    2    0.358270    0.765220    0.066114    11.00000    0.01692
H2    2    0.589606    0.814144    0.141123    11.00000    0.03887
HKLF 4

REM  ld9_a.res in P-1
REM R1 =  0.0419 for    5449 Fo > 4sig(Fo)  and  0.0488 for all    6224 data
REM    364 parameters refined using      0 restraints

END

WGHT      0.0488      0.9641

REM Instructions for potential hydrogen bonds
EQIV $1 -x+1, -y+2, -z
HTAB C10 O7_$1
EQIV $2 -x+1, -y+1, -z+1
HTAB C17 O1_$2
HTAB C12 N4
HTAB C12 O4
EQIV $3 -x+1, -y+1, -z
HTAB C22 O7_$3
HTAB C25 O7_$1
HTAB C25 O2
HTAB C23 O5
HTAB C26 O6_$1
HTAB N3 O5
HTAB N2 O5
HTAB N2 O6
HTAB N2 N5

REM Highest difference peak  0.670,  deepest hole -0.875,  1-sigma level  0.082
Q1    1   0.4960  0.8791  0.0161  11.00000  0.05    0.67
Q2    1   0.3035  0.6402  0.2048  11.00000  0.05    0.43
Q3    1   0.5540  0.8059  0.2676  11.00000  0.05    0.40
Q4    1   0.2975  0.7410  0.2414  11.00000  0.05    0.38
Q5    1   0.1437  0.6955  0.3464  11.00000  0.05    0.37
Q6    1   0.3493  0.7131  0.2935  11.00000  0.05    0.36
Q7    1   0.3326  0.9049  0.3785  11.00000  0.05    0.35
Q8    1   0.7865  0.7364  0.1871  11.00000  0.05    0.35
Q9    1   0.7626  0.8809 -0.0926  11.00000  0.05    0.34
Q10   1   0.3680  0.7709  0.1726  11.00000  0.05    0.34
Q11   1   0.4702  0.4736  0.2652  11.00000  0.05    0.34
Q12   1   0.2533  0.8993  0.4283  11.00000  0.05    0.33
Q13   1   0.4968  0.7912  0.1916  11.00000  0.05    0.32
Q14   1   0.4928  0.5400  0.3450  11.00000  0.05    0.32
Q15   1   0.5228  0.4160  0.3379  11.00000  0.05    0.32
Q16   1   0.4918  0.6843  0.3092  11.00000  0.05    0.31
Q17   1   0.4993  0.7263  0.1736  11.00000  0.05    0.30
Q18   1   0.5229  0.8118  0.3455  11.00000  0.05    0.28
Q19   1   0.3623  0.6441  0.2806  11.00000  0.05    0.28
Q20   1   0.6276  0.6136  0.4350  11.00000  0.05    0.28
;
_shelx_res_checksum               33006
_shelx_hkl_file
;
   0   0  -1  755.59   28.67
   0   0   1  755.12   28.63
   0   0  -3 3024.68  114.79
   0   0   3 2792.12  106.05
   0   0  -5  123.24    8.97
   0   0   5  111.75    8.31
   0   0  -6   23.44    7.38
   0   0   6   36.94    7.38
   0   0  -7  880.74   34.74
   0   0   7  842.45   33.39
   0   0  -8  310.87   14.38
   0   0   8  269.55   13.36
   0   0  -9  258.52   12.94
   0   0   9  215.65   12.00
   0   0 -10  239.66   12.00
   0   0  10  235.74   12.84
   0   0 -11    7.66    6.63
   0   0  11   -3.69    7.94
   0   0 -12   94.89    7.80
   0   0  12   99.09    9.29
   0   0 -13   54.87    7.85
   0   0  13   70.75    9.06
   0   0  13   69.44    9.43
   0   0 -14  152.10   10.65
   0   0  14  135.19   10.93
   0   0  14  146.31   10.93
   0   0 -15  732.24   29.98
   0   0  15  638.84   26.81
   0   0  15  691.14   28.95
   0   0 -16   35.49    7.94
   0   0  16   38.39    9.01
   0   0  16   29.79    9.43
   0   0 -17  281.64   13.78
   0   0  17  274.68   14.57
   0   0  17  241.67   13.40
   0  -1  17   56.69    9.06
   0  -1  17   66.27    9.11
   0   1 -17   66.45    7.66
   0  -1  16   71.54    9.57
   0  -1  16   87.56    9.71
   0   1 -16  104.00    9.39
   0  -1  15  140.28   10.41
   0  -1  15  126.88   11.30
   0   1 -15  157.56   10.74
   0  -1  14   19.24    9.25
   0  -1  14    6.35    8.69
   0   1 -14    0.65    7.99
   0  -1  13  287.01   14.85
   0  -1  13  302.70   15.41
   0   1 -13  296.44   14.43
   0  -1  12    6.12    8.31
   0  -1  12    8.78    8.22
   0   1 -12   12.98    7.29
   0  -1  11  632.77   26.52
   0  -1  11  565.52   23.86
   0   1 -11  652.85   26.76
   0  -1  10  515.55   22.09
   0  -1  10  475.86   20.41
   0   1 -10  532.37   22.37
   0  -1   9  175.49   11.25
   0  -1   9  168.63   10.79
   0   1  -9  192.21   10.93
   0  -1   8  909.23   36.10
   0  -1   8  900.82   35.86
   0   1  -8  975.07   38.25
   0  -1   7 4157.59  157.75
   0  -1   7 4137.51  156.95
   0   1  -7 4150.59  157.37
   0  -1   6 1132.91   44.08
   0  -1   6 1101.16   42.96
   0   1  -6 1196.42   46.42
   0  -1   5  275.48   13.68
   0  -1   5  263.71   13.50
   0   1  -5  303.08   14.34
   0  -1   4  439.58   19.19
   0  -1   4  437.33   19.57
   0   1  -4  466.89   20.22
   0  -1   3 1582.62   61.08
   0  -1   3 1712.44   65.47
   0   1  -3 1874.49   72.10
   0   1  -3 1896.44   72.43
   0  -1   2  186.98    8.78
   0  -1   2  177.08    8.87
   0   1  -2  195.25    9.43
   0   1  -2  186.51    8.59
   0  -1   0 1150.19   43.66
   0   1   0 1889.90   71.50
   0  -1  -2 1159.06   44.74
   0   1   2 1219.77   46.84
   0  -1  -3  327.64   15.32
   0   1   3  322.22   14.52
   0  -1  -4  449.66   19.52
   0   1   4  470.26   19.89
   0  -1  -5   11.58    7.43
   0   1   5    9.71    6.58
   0  -1  -6   74.67    8.36
   0   1   6   76.68    8.22
   0  -1  -7  415.43   18.17
   0   1   7  391.15   17.05
   0  -1  -8    4.67    7.10
   0   1   8    0.14    7.19
   0  -1  -9  167.84   10.69
   0   1   9  156.77    9.71
   0  -1 -10    2.33    6.16
   0   1  10   -0.51    7.75
   0  -1 -11    9.01    6.86
   0   1  11   11.16    7.85
   0  -1 -12  862.06   34.28
   0   1  12  855.99   34.74
   0  -1 -13  141.54    9.53
   0   1  13  143.46   11.25
   0  -1 -14   34.09    7.66
   0   1  14   43.76    9.20
   0  -1 -15   53.10    7.24
   0   1  15   42.64    8.22
   0   1  15   39.32    9.53
   0  -1 -16  663.12   26.90
   0   1  16  612.22   25.96
   0   1  16  614.09   25.73
   0  -1 -17   78.27    8.55
   0   1  17   81.16    8.97
   0   1  17   83.26    9.62
   0  -2  17   31.01    8.83
   0  -2  17   41.28    8.92
   0   2 -17   42.22    7.85
   0  -2  16  132.90   10.65
   0  -2  16  128.89   10.65
   0   2 -16  151.77   10.23
   0  -2  15  218.50   13.54
   0  -2  15  234.24   13.17
   0   2 -15  261.61   13.82
   0  -2  14  111.75   10.55
   0  -2  14  105.82   10.32
   0   2 -14  118.10    9.57
   0  -2  13   68.83    9.67
   0  -2  13   62.62    9.34
   0   2 -13   74.48    8.36
   0  -2  12  200.48   12.14
   0  -2  12  169.24   11.07
   0   2 -12  195.11   11.11
   0  -2  11  379.99   17.37
   0  -2  11  398.01   18.31
   0   2 -11  424.31   18.63
   0  -2  10  756.99   30.68
   0  -2  10  698.61   28.44
   0   2 -10  804.15   31.99
   0  -2   9 2103.31   80.74
   0  -2   9 2059.88   79.06
   0   2  -9 2323.73   88.73
   0  -2   8 1407.03   54.40
   0  -2   8 1399.56   54.31
   0   2  -8 1593.36   61.32
   0  -2   7   12.80    7.61
   0  -2   7    8.41    7.24
   0   2  -7   16.90    7.05
   0   2  -6 1511.64   58.14
   0  -2   5 3034.95  115.49
   0  -2   5 3060.64  116.33
   0   2  -5 3232.49  122.72
   0   2  -5 3205.40  121.93
   0  -2   4  197.49   11.16
   0  -2   4  214.44   12.33
   0  -2   3  440.28   18.77
   0  -2   3  445.18   20.50
   0   2  -3  502.01   21.48
   0   2  -3  458.02   20.87
   0  -2   2 1881.49   72.29
   0   2  -2 2087.90   79.99
   0  -2   1  164.80    9.99
   0   2  -1  168.02    9.85
   0  -2   0 2976.58  112.92
   0  -2  -1  454.99   19.52
   0   2   1  527.23   21.53
   0  -2  -2   28.67    8.55
   0   2   2   35.12    7.66
   0  -2  -3 1237.52   48.15
   0   2   3 1189.42   46.47
   0  -2  -4  843.38   33.30
   0   2   4  875.13   34.46
   0  -2  -5 3607.48  136.97
   0   2   5 3644.37  138.42
   0  -2  -6  621.09   25.45
   0   2   6  617.36   25.08
   0  -2  -7 1577.02   60.85
   0   2   7 1598.50   61.69
   0  -2  -8 3000.86  114.32
   0   2   8 2952.76  112.59
   0  -2  -9 3439.83  130.90
   0   2   9 3521.55  134.03
   0  -2 -10 1274.41   49.78
   0   2  10 1323.44   51.74
   0  -2 -11   31.15    7.66
   0   2  11   20.87    8.64
   0  -2 -12  731.30   29.75
   0   2  12  729.90   30.07
   0  -2 -13    9.29    7.38
   0   2  13    0.47    8.50
   0  -2 -14  114.69    9.39
   0   2  14  106.99   10.32
   0  -2 -15  112.40    9.15
   0   2  15  112.22   10.65
   0  -2 -16  201.51   11.07
   0   2  16  191.61   12.14
   0  -3  18    6.35    8.64
   0  -3  18   -3.13    8.08
   0   3 -18    5.23    6.96
   0  -3  17  119.27   10.18
   0  -3  17  102.60   10.27
   0   3 -17  146.77    9.95
   0  -3  16  132.02   10.55
   0  -3  16  139.35   11.95
   0   3 -16  178.67   10.65
   0  -3  15   78.69    9.20
   0  -3  15   81.63   10.69
   0   3 -15   80.04    9.34
   0  -3  14  255.96   14.34
   0  -3  14  235.32   13.87
   0   3 -14  257.82   13.26
   0  -3  13  130.15   10.88
   0  -3  13  120.53   10.23
   0   3 -13  137.76   10.04
   0  -3  12   23.26    8.45
   0  -3  12   34.42    8.31
   0   3 -12   44.18    7.10
   0  -3  11  203.79   12.28
   0  -3  11  208.70   12.14
   0   3 -11  213.97   11.77
   0  -3  10  135.15    9.71
   0  -3  10  137.81    9.99
   0   3 -10  154.43    9.34
   0  -3   9   21.25    7.61
   0  -3   9    5.74    7.89
   0   3  -9   18.63    6.86
   0  -3   8  286.78   13.96
   0  -3   8  289.67   14.48
   0   3  -8  380.50   16.72
   0  -3   7 3484.66  132.34
   0  -3   7 3646.71  138.60
   0   3  -7 4010.96  152.19
   0   3  -7 3726.09  141.68
   0  -3   6  599.61   24.70
   0  -3   6  632.30   25.92
   0   3  -6  681.34   27.51
   0   3  -6  647.24   26.71
   0  -3   5  328.53   15.18
   0  -3   5  343.19   15.74
   0   3  -5  358.37   16.62
   0   3  -5  345.29   15.60
   0  -3   4  214.95   12.00
   0  -3   4  212.01   11.53
   0   3  -4  238.26   12.89
   0  -3   3 1701.24   65.66
   0  -3   3 1674.15   64.40
   0   3  -3 1867.95   71.96
   0  -3   2  155.93   11.21
   0   3  -2  170.36   12.05
   0  -3   1   17.05    8.92
   0   3  -1   25.82    8.73
   0  -3   0  134.63   10.09
   0  -3  -2 4076.80  154.62
   0   3   2 5076.16  192.40
   0  -3  -3 3641.57  138.18
   0   3   3 3855.45  146.21
   0  -3  -4  692.08   28.16
   0   3   4  740.64   29.84
   0  -3  -5  511.82   21.39
   0   3   5  559.92   23.35
   0  -3  -6 1729.26   66.45
   0   3   6 1834.33   70.52
   0  -3  -7  626.23   25.68
   0   3   7  638.84   26.52
   0  -3  -8 2339.14   89.43
   0   3   8 2450.28   93.68
   0  -3  -9  169.84   10.04
   0   3   9  189.92   11.49
   0  -3 -10 5613.19  212.81
   0   3  10 5627.20  213.32
   0  -3 -11 1082.94   42.64
   0   3  11 1110.03   43.94
   0  -3 -12    7.75    7.43
   0   3  12   -3.78    8.87
   0  -3 -13  377.28   17.42
   0   3  13  383.16   18.03
   0  -3 -14   15.69    7.71
   0   3  14    0.79    8.36
   0  -3 -15   20.36    6.82
   0   3  15   11.44    8.17
   0  -3 -16   41.84    7.52
   0   3  16   46.75    8.50
   0  -4  18    8.78    8.64
   0  -4  18   13.03    8.50
   0   4 -18    6.30    7.43
   0  -4  17   24.05    9.06
   0  -4  17   11.63    8.41
   0   4 -17   25.73    7.10
   0  -4  16  116.42   10.32
   0  -4  16  129.92   10.97
   0   4 -16  141.22   10.04
   0  -4  15   76.73    9.34
   0  -4  15   84.66   10.04
   0   4 -15   80.18    8.50
   0  -4  14   25.87    9.34
   0  -4  14   29.93    9.20
   0   4 -14   24.56    7.33
   0  -4  13  124.50   10.46
   0  -4  13  136.45   11.21
   0   4 -13  160.27   10.04
   0  -4  12  218.69   12.52
   0  -4  12  216.78   12.70
   0   4 -12  246.20   12.75
   0  -4  11   31.38    8.36
   0  -4  11   10.60    8.31
   0   4 -11   18.96    7.66
   0  -4  10  967.60   38.43
   0  -4  10  934.91   37.13
   0   4 -10 1024.10   40.25
   0  -4   9   17.00    7.71
   0  -4   9    7.61    8.08
   0   4  -9    5.42    8.27
   0   4  -9   21.25    7.38
   0  -4   8    7.19    8.08
   0  -4   8   16.30    7.61
   0   4  -8   15.04    8.13
   0   4  -8   18.77    6.96
   0  -4   7    8.03    7.71
   0  -4   7    8.83    7.38
   0   4  -7   -1.07    7.94
   0   4  -7    9.76    7.00
   0  -4   6  371.96   17.05
   0  -4   6  367.89   16.62
   0   4  -6  402.68   18.12
   0  -4   5   30.91    7.99
   0  -4   5   21.86    7.80
   0   4  -5   38.76    8.31
   0  -4   4   14.99    7.61
   0  -4   4   15.55    7.52
   0   4  -4   23.54    8.31
   0  -4   3  289.77   14.24
   0   4  -3  312.37   15.18
   0  -4   2  141.92   10.04
   0   4  -2  146.45   10.32
   0  -4   1 1048.39   41.14
   0   4  -1 1092.28   42.78
   0  -4   0 2329.33   88.82
   0   4   0 3151.70  120.06
   0  -4  -1 2089.77   79.95
   0   4   1 2157.95   82.52
   0  -4  -2 4819.31  182.73
   0   4   2 4767.94  180.63
   0  -4  -3  762.12   30.49
   0   4   3  880.27   34.98
   0  -4  -4 2022.06   77.52
   0   4   4 2189.71   83.73
   0  -4  -5  793.88   31.76
   0   4   5  859.26   34.28
   0  -4  -6   -1.82    7.71
   0   4   6    7.85    7.38
   0  -4  -7  794.81   32.04
   0   4   7  831.24   33.16
   0  -4  -8  109.98    9.06
   0   4   8   98.25    8.73
   0  -4  -9  840.11   33.76
   0   4   9  875.60   35.21
   0  -4 -10   54.82    8.03
   0   4  10   74.86    9.48
   0  -4 -11  344.54   15.92
   0   4  11  323.67   16.30
   0  -4 -12  216.68   12.28
   0   4  12  255.91   14.43
   0  -4 -13   63.23    8.55
   0   4  13   49.27    9.53
   0  -4 -14   -0.65    7.71
   0   4  14   -2.10    8.87
   0  -4 -15  263.29   13.22
   0   4  15  199.45   12.14
   0  -5  17   61.69    9.06
   0  -5  17   59.54    9.43
   0   5 -17   70.05    8.41
   0  -5  16  328.29   16.58
   0  -5  16  301.95   15.32
   0   5 -16  379.19   17.05
   0  -5  15  684.14   28.72
   0  -5  15  620.16   26.06
   0   5 -15  718.23   29.23
   0  -5  14   48.01    9.76
   0  -5  14   45.06    9.20
   0   5 -14   64.82    8.87
   0  -5  13  211.17   12.98
   0  -5  13  237.51   13.50
   0   5 -13  244.28   12.80
   0  -5  12  102.41    9.67
   0  -5  12   86.07    9.48
   0   5 -12  111.14    9.15
   0  -5  11  740.18   30.21
   0  -5  11  800.88   32.74
   0   5 -11  884.01   35.12
   0  -5  10  110.40    9.57
   0  -5  10   98.07    9.29
   0   5 -10  106.38    8.87
   0   5 -10  120.53   10.51
   0  -5   9  435.23   19.19
   0  -5   9  441.82   19.47
   0   5  -9  475.39   21.25
   0  -5   8   43.90    8.50
   0  -5   8   64.82    8.22
   0   5  -8   50.81    8.92
   0  -5   7  417.53   18.54
   0  -5   7  403.38   18.07
   0   5  -7  427.48   19.19
   0  -5   6   56.32    8.17
   0  -5   6   52.82    7.80
   0   5  -6   73.41    9.01
   0  -5   5   -2.48    7.05
   0  -5   5    9.15    7.89
   0   5  -5    4.53    8.41
   0  -5   4  619.23   25.59
   0   5  -4  626.23   25.87
   0  -5   3   56.51    8.69
   0   5  -3   74.62    9.11
   0  -5   2  189.50   11.16
   0   5  -2  227.47   12.47
   0   5  -1  438.27   19.24
   0  -5   0 5440.41  205.89
   0   5   0 6122.21  231.81
   0  -5  -1 4348.12  164.85
   0   5   1 4753.94  180.26
   0  -5  -2 3994.61  151.68
   0   5   2 4192.62  159.10
   0  -5  -3  480.53   20.64
   0   5   3  570.66   23.77
   0  -5  -4  227.47   12.24
   0   5   4  268.47   13.64
   0  -5  -5  797.15   32.08
   0   5   5  860.19   34.37
   0  -5  -6  511.82   21.71
   0   5   6  530.03   22.32
   0  -5  -7    7.75    7.80
   0   5   7    0.51    7.33
   0  -5  -8  111.28   10.18
   0   5   8   99.66    9.15
   0  -5  -9   70.05    8.69
   0   5   9   72.15    8.73
   0  -5 -10  283.04   14.20
   0   5  10  310.45   15.41
   0  -5 -11  149.48    9.95
   0   5  11  162.18   11.21
   0  -5 -12  115.25    9.53
   0   5  12  126.93   10.46
   0  -5 -13   38.43    8.22
   0   5  13   35.44    9.20
   0  -5 -14  233.49   12.09
   0   5  14  259.74   13.59
   0  -6  17   17.51    9.11
   0  -6  17   12.84    9.25
   0   6 -17   24.14    7.14
   0  -6  16  246.38   14.01
   0  -6  16  251.47   13.78
   0   6 -16  245.96   12.61
   0  -6  15   95.03   10.32
   0  -6  15   76.21    9.85
   0   6 -15   77.05    8.64
   0  -6  14  728.03   30.40
   0  -6  14  718.69   29.89
   0  -6  13   15.69    8.92
   0  -6  13   25.17    9.15
   0  -6  12   25.78    8.45
   0  -6  12   17.70    8.97
   0  -6  11  684.14   28.49
   0  -6  11  661.72   27.74
   0   6 -11  641.64   27.37
   0  -6  10  564.12   23.86
   0  -6  10  571.13   24.24
   0   6 -10  570.19   24.75
   0  -6   9    2.19    7.71
   0  -6   9    7.43    7.85
   0   6  -9   11.25    8.64
   0  -6   8   26.38    8.55
   0  -6   8   47.07    7.85
   0   6  -8   32.18    8.55
   0  -6   7  341.51   16.02
   0  -6   7  331.33   15.74
   0   6  -7  357.15   17.14
   0  -6   6  198.98   12.05
   0  -6   6  188.66   11.35
   0   6  -6  225.74   12.94
   0  -6   5  117.91    9.57
   0  -6   5   96.99    9.48
   0   6  -5  125.20    9.95
   0  -6   4  551.05   23.26
   0   6  -4  586.07   24.47
   0  -6   3  450.04   19.33
   0   6  -3  529.56   22.70
   0  -6   2  110.63    9.01
   0   6  -2  111.00    9.43
   0   6  -1  664.06   27.32
   0  -6   0  648.65   26.57
   0   6   0  702.82   28.67
   0  -6  -1  165.08   10.60
   0   6   1  193.24   11.11
   0  -6  -2  275.20   13.96
   0   6   2  289.72   14.43
   0  -6  -3  379.80   17.14
   0   6   3  452.09   19.85
   0  -6  -4  101.99    8.97
   0   6   4  122.86    9.29
   0  -6  -5  230.22   12.66
   0   6   5  249.09   12.94
   0  -6  -6   12.33    8.27
   0   6   6    9.62    7.47
   0  -6  -7  546.38   23.35
   0   6   7  595.88   24.89
   0  -6  -8   50.48    8.50
   0   6   8   44.97    8.17
   0  -6  -9  271.74   14.10
   0   6   9  296.35   14.76
   0  -6 -10   88.45    8.59
   0   6  10  107.27    9.71
   0  -6 -11  632.77   26.38
   0   6  11  694.41   28.86
   0  -6 -12   14.71    7.14
   0   6  12   10.65    9.06
   0  -6 -13  451.48   19.57
   0   6  13  478.66   21.11
   0  -7  17  128.89   10.41
   0  -7  17  140.80   11.21
   0  -7  16    7.47    9.01
   0  -7  16    1.63    8.73
   0  -7  15  706.55   29.23
   0  -7  15  762.12   31.29
   0  -7  14  160.64   11.81
   0  -7  14  177.36   12.19
   0  -7  13  688.34   28.67
   0  -7  13  756.99   31.43
   0  -7  12  613.15   26.06
   0  -7  12  643.04   27.27
   0   7 -12  551.05   24.14
   0  -7  11  491.74   21.53
   0  -7  11  462.83   20.73
   0   7 -11  439.58   20.27
   0  -7  10  251.01   14.06
   0  -7  10  223.50   12.52
   0   7 -10  234.24   13.73
   0  -7   9  238.82   13.03
   0  -7   9  232.84   13.08
   0   7  -9  250.49   14.20
   0  -7   8  117.31    9.48
   0  -7   8  126.88   10.09
   0   7  -8  123.05   10.41
   0  -7   7  560.39   23.40
   0  -7   7  496.41   21.57
   0   7  -7  537.97   23.26
   0  -7   6  336.42   16.06
   0  -7   6  352.11   16.16
   0   7  -6  363.92   17.65
   0  -7   5  274.12   14.01
   0   7  -5  331.05   16.20
   0  -7   4   39.65    7.89
   0   7  -4   36.52    9.11
   0  -7   3  329.41   15.64
   0   7  -3  378.12   17.51
   0  -7   2  303.73   14.57
   0   7  -2  340.01   16.16
   0   7  -1   96.06    9.48
   0  -7   0 1288.42   50.34
   0   7   0 1442.06   56.09
   0  -7  -1   24.10    7.57
   0   7   1   12.80    7.85
   0  -7  -2  144.81   10.74
   0   7   2  168.82   10.79
   0  -7  -3  195.29   11.77
   0   7   3  212.57   11.95
   0  -7  -4  379.99   17.84
   0   7   4  412.30   18.45
   0  -7  -5  116.28   10.04
   0   7   5   98.49    9.06
   0  -7  -6  563.65   23.96
   0   7   6  635.57   26.38
   0  -7  -7   13.96    8.31
   0   7   7    9.06    8.08
   0  -7  -8  947.05   38.06
   0   7   8 1043.72   41.52
   0  -7  -9  323.20   16.48
   0   7   9  321.66   15.83
   0  -7 -10  285.94   14.76
   0   7  10  304.71   15.18
   0  -7 -11   21.67    7.80
   0   7  11   13.50    8.97
   0  -7 -12  758.86   30.59
   0   7  12  919.50   36.71
   0  -8  16  147.75   10.97
   0  -8  16  140.33   10.93
   0  -8  15    2.10    8.08
   0  -8  15   -5.09    9.11
   0  -8  14   99.70    9.90
   0  -8  14  126.32   10.83
   0  -8  13  127.11   10.83
   0  -8  13  140.33   11.02
   0   8 -13  123.14   10.97
   0  -8  12  690.21   28.49
   0  -8  12  744.85   30.96
   0   8 -12  655.65   27.74
   0  -8  11  103.06   10.13
   0  -8  11   89.85    9.48
   0   8 -11  109.56   10.88
   0  -8  10  507.15   21.90
   0  -8  10  525.36   23.16
   0   8 -10  503.41   22.32
   0  -8   9  319.05   15.88
   0  -8   9  288.97   14.57
   0   8  -9  291.68   15.55
   0  -8   8 1174.47   46.14
   0  -8   8 1190.35   46.93
   0   8  -8 1155.79   45.86
   0  -8   7  851.79   34.46
   0  -8   7  870.00   34.98
   0   8  -7  898.48   36.47
   0  -8   6  827.97   33.67
   0  -8   6  890.08   35.63
   0   8  -6  872.33   35.26
   0  -8   5  625.76   26.34
   0   8  -5  703.75   29.05
   0  -8   4   83.03    8.92
   0   8  -4   92.32    9.99
   0  -8   3   48.99    8.78
   0   8  -3   41.75    9.01
   0  -8   2  474.46   20.69
   0   8  -2  515.55   22.42
   0  -8   1 1239.39   48.75
   0   8  -1 1215.10   47.77
   0  -8   0  429.86   19.47
   0   8   0  423.28   19.33
   0  -8  -1  354.49   17.28
   0   8   1  359.30   17.19
   0  -8  -2   88.03    9.71
   0   8   2  102.60    9.01
   0  -8  -3   38.25    8.78
   0   8   3   42.12    8.87
   0  -8  -4   16.34    8.31
   0   8   4   -2.99    7.89
   0  -8  -5    6.21    8.31
   0   8   5   26.71    8.45
   0  -8  -6  270.85   14.29
   0   8   6  278.56   14.71
   0  -8  -7  378.68   18.12
   0   8   7  416.93   18.96
   0  -8  -8  211.97   13.36
   0   8   8  251.52   13.78
   0  -8  -9  183.01   11.95
   0   8   9  201.13   12.24
   0  -8 -10  196.51   11.91
   0   8  10  243.39   13.22
   0  -8 -11  121.04    9.48
   0   8  11  149.11   10.37
   0  -9  16    6.49    7.99
   0  -9  16   14.20    9.15
   0  -9  15   72.66    8.92
   0  -9  15   60.57    9.48
   0  -9  14  135.99   10.46
   0  -9  14  143.79   11.02
   0   9 -14  127.07   11.21
   0  -9  13  213.79   12.19
   0  -9  13  215.09   12.75
   0   9 -13  167.60   12.09
   0  -9  12   39.88    8.41
   0  -9  12   31.80    9.34
   0   9 -12   22.98    9.71
   0  -9  11  353.79   16.90
   0  -9  11  319.93   16.16
   0   9 -11  302.42   16.02
   0  -9  10 1124.97   44.69
   0  -9  10 1094.15   43.15
   0   9 -10 1045.59   41.94
   0  -9   9  168.40   11.77
   0  -9   9  174.47   11.30
   0   9  -9  171.62   11.86
   0  -9   8  893.81   35.82
   0  -9   8  886.81   35.86
   0   9  -8  930.24   37.73
   0  -9   7 1265.54   49.78
   0  -9   7 1370.61   53.38
   0   9  -7 1323.44   52.02
   0  -9   6  386.71   17.33
   0  -9   6  332.36   16.16
   0   9  -6  333.66   16.25
   0  -9   5   71.50    9.15
   0   9  -5   83.17    9.43
   0  -9   4   95.59    9.34
   0   9  -4  101.29    9.95
   0  -9   3  184.13   12.00
   0   9  -3  188.34   11.39
   0  -9   2  664.06   27.46
   0   9  -2  700.01   28.95
   0  -9   1  299.43   14.85
   0  -9   0 1183.81   46.47
   0   9   0 1189.42   46.89
   0  -9  -1   47.03    8.45
   0   9   1   48.75    8.73
   0  -9  -2   57.30    9.01
   0   9   2   62.02    8.78
   0  -9  -3   28.39    8.69
   0   9   3   -0.75    8.13
   0  -9  -4  239.00   13.31
   0   9   4  240.45   13.45
   0  -9  -5   65.28    9.15
   0   9   5   79.48    9.48
   0  -9  -6  243.58   13.50
   0   9   6  259.60   14.24
   0  -9  -7   57.63    9.34
   0   9   7   43.76    8.73
   0  -9  -8  177.97   11.67
   0   9   8  198.66   12.05
   0  -9  -9   92.65    9.29
   0   9   9  105.77    9.76
   0  -9 -10   92.93    9.67
   0   9  10  108.76    9.43
   0 -10  15   24.28    7.75
   0 -10  15   20.17    8.97
   0  10 -15   19.71    8.73
   0 -10  14  359.95   16.76
   0 -10  14  324.51   16.11
   0  10 -14  301.07   15.41
   0 -10  13  215.42   11.95
   0 -10  13  199.45   12.47
   0  10 -13  192.77   12.80
   0 -10  12  106.89    9.34
   0 -10  12  123.80   10.46
   0  10 -12  104.84   10.23
   0 -10  11   82.05    9.11
   0 -10  11   97.18   10.32
   0  10 -11   91.76   10.18
   0 -10  10  569.26   24.33
   0 -10  10  619.23   26.01
   0  10 -10  548.71   23.96
   0 -10   9   -0.09    9.29
   0 -10   9   -5.09    8.31
   0  10  -9   -0.89    9.01
   0 -10   8  290.79   14.62
   0 -10   8  248.16   14.34
   0  10  -8  284.16   15.41
   0 -10   7  599.61   25.17
   0 -10   7  557.58   24.33
   0  10  -7  598.21   26.01
   0 -10   6   35.82    7.80
   0 -10   6   21.81    9.71
   0  10  -6   30.31    8.92
   0 -10   5  246.24   13.54
   0  10  -5  238.30   13.26
   0 -10   4   70.47    9.34
   0  10  -4   91.16   10.04
   0 -10   3  658.45   27.46
   0  10  -3  681.80   28.44
   0 -10   2  100.87    9.71
   0  10  -2  101.43    9.48
   0 -10   1  615.96   25.82
   0 -10   0  190.67   11.77
   0  10   0  182.03   11.35
   0 -10  -1  924.64   36.99
   0  10   1  900.35   36.10
   0 -10  -2  119.83   10.13
   0  10   2  115.95    9.67
   0 -10  -3  115.95   10.18
   0  10   3  137.39   10.65
   0 -10  -4   18.73    8.83
   0  10   4   16.02    7.89
   0 -10  -5  340.81   16.72
   0  10   5  367.33   17.33
   0 -10  -6   15.36    8.64
   0  10   6    6.82    8.31
   0 -10  -7  146.87   10.74
   0  10   7  171.85   11.16
   0 -10  -8   24.84    7.99
   0  10   8   38.43    8.13
   0 -11  14    4.16    7.24
   0 -11  14   10.97    8.87
   0  11 -14   11.86    9.11
   0  11 -13  140.98   10.93
   0 -11  12  207.02   12.56
   0 -11  12  217.52   11.95
   0  11 -12  178.67   11.81
   0 -11  11   19.10    7.80
   0 -11  11   21.15    9.06
   0  11 -11    2.01    8.78
   0 -11  10  213.65   12.09
   0 -11  10  202.81   12.61
   0  11 -10  192.91   12.66
   0 -11   9  744.38   30.17
   0 -11   9  742.04   30.45
   0  11  -9  682.74   28.67
   0 -11   8    7.14    8.55
   0 -11   8    3.27    7.94
   0  11  -8   12.14    9.34
   0 -11   7   -7.33    9.34
   0 -11   7   -4.76    8.22
   0  11  -7   13.54    9.06
   0 -11   6  696.75   29.14
   0 -11   6  619.69   26.15
   0  11  -6  663.12   27.65
   0 -11   5   20.27    8.64
   0  11  -5    7.43    8.78
   0 -11   4  430.89   19.75
   0  11  -4  432.48   19.61
   0 -11   3    9.99    8.31
   0  11  -3   -9.81    8.92
   0 -11   2  878.87   35.49
   0  11  -2  910.16   36.47
   0 -11   1  125.90    9.90
   0 -11   0  637.44   26.57
   0  11   0  628.10   26.15
   0 -11  -1    8.83    7.71
   0  11   1   17.19    8.45
   0 -11  -2  705.62   29.09
   0  11   2  776.60   31.71
   0 -11  -3   10.74    8.36
   0  11   3    8.45    8.27
   0 -11  -4   13.03    8.41
   0  11   4   23.86    8.55
   0 -11  -5   -3.22    8.13
   0  11   5  -17.79    9.20
   0 -11  -6  115.49    9.43
   0  11   6  129.36    9.20
   0 -12  12    3.60    7.19
   0 -12  12    9.99    8.03
   0  12 -12    2.57    8.87
   0 -12  11  312.04   14.62
   0 -12  11  338.43   15.97
   0  12 -11  303.64   15.18
   0 -12  10  607.08   24.94
   0 -12  10  632.77   26.20
   0  12 -10  581.87   24.75
   0 -12   9   50.95    9.43
   0 -12   9   65.94    8.03
   0  12  -9   59.63    9.34
   0 -12   8  180.35   11.39
   0 -12   8  193.29   11.11
   0  12  -8  183.90   12.28
   0 -12   7  602.88   24.94
   0 -12   7  564.59   24.14
   0  12  -7  603.82   25.54
   0 -12   6   16.95    9.06
   0 -12   6   13.87    6.91
   0  12  -6   20.73    8.64
   0 -12   5  260.25   14.10
   0  12  -5  286.73   15.08
   0 -12   4   11.95    8.73
   0  12  -4   20.64    8.41
   0 -12   3  552.45   23.30
   0  12  -3  514.62   21.95
   0 -12   2    3.69    8.92
   0  12  -2    1.12    7.38
   0 -12   1   28.30    8.13
   0  12  -1   26.20    7.71
   0 -12   0   25.31    8.36
   0  12   0   34.37    7.94
   0 -12  -1   85.88    8.83
   0  12   1  123.71    9.34
   0 -12  -2  271.37   13.64
   0  12   2  335.81   15.69
   0 -12  -3  115.53    9.39
   0  12   3  158.68   10.27
   0 -12  -4   32.74    7.89
   0 -13   9   30.96    8.97
   0 -13   9   20.13    6.58
   0  13  -9   12.38    8.27
   0 -13   8  297.28   14.52
   0 -13   8  331.65   14.80
   0  13  -8  308.12   15.36
   0 -13   7   82.42    9.43
   0 -13   7   71.73    7.29
   0  13  -7   64.21    8.92
   0 -13   6  722.43   28.77
   0 -13   6  684.60   27.88
   0  13  -6  641.17   26.29
   0 -13   5   16.30    7.85
   0  13  -5   22.56    8.64
   0 -13   4  169.47   10.55
   0  13  -4  160.50   10.51
   0 -13   3   93.12    8.59
   0  13  -3   95.59    8.73
   0 -13   2   -6.77    7.71
   0  13  -2    4.34    7.99
   0 -13   1    7.00    8.03
   0  13  -1   16.39    7.14
   0 -13   0  104.00    8.36
   0  13   0  126.46    8.92
  -1  13   1  283.51   13.78
   1 -13  -1  250.12   12.80
  -1  13   0    4.76    6.77
   1 -13   0   10.69    7.33
  -1  13  -1   -0.33    7.66
   1 -13   1    6.02    7.43
  -1  13  -2  129.22    9.95
   1 -13   2  102.69    9.76
  -1  13  -3    1.77    8.08
   1 -13   3   -3.32    8.55
  -1  13  -4   54.03    8.87
   1 -13   4   54.40    9.20
  -1  13  -5  135.71   10.93
   1 -13   5  140.28   10.74
  -1  13  -6  348.42   16.58
   1 -13   6  364.76   16.25
   1 -13   6  383.82   17.37
  -1  13  -7   92.04    9.53
   1 -13   7   99.80    9.11
   1 -13   7  119.32    9.06
  -1  13  -8   57.95    9.06
   1 -13   8   57.95    7.66
   1 -13   8   64.12    9.34
  -1  13  -9    9.01    8.69
   1 -13   9   30.68    8.83
   1 -13   9   31.62    7.10
  -1  12   4   18.21    7.14
   1 -12  -4   16.58    7.52
  -1  12   3  294.44   14.10
   1 -12  -3  244.42   12.52
  -1  12   2   -1.59    7.85
   1 -12  -2   -8.31    7.75
  -1  12   1  178.76   10.69
   1 -12  -1  148.97   10.32
  -1  12   0   22.32    7.94
   1 -12   0   27.27    7.85
  -1  12  -1   85.13    9.25
   1 -12   1   70.56    9.43
  -1  12  -2  184.60   11.77
   1 -12   2  165.69   10.93
  -1  12  -3 1134.31   44.69
   1 -12   3 1157.66   45.53
  -1  12  -4   52.91    9.01
   1 -12   4   60.57    9.71
  -1  12  -5  532.37   22.88
   1 -12   5  538.44   23.40
  -1  12  -6   11.30    9.34
   1 -12   6   14.62    9.20
  -1  12  -7 1025.04   41.14
   1 -12   7  987.68   39.09
   1 -12   7  916.23   36.80
  -1  12  -8   41.75    9.57
   1 -12   8   51.46    8.41
   1 -12   8   44.97    8.13
  -1  12  -9   21.11    9.29
   1 -12   9   36.14    7.71
   1 -12   9   29.65    9.06
  -1  12 -10    0.93    8.97
   1 -12  10    2.10    7.94
   1 -12  10   -1.03    7.57
  -1  12 -11    6.12    8.73
   1 -12  11    2.90    8.36
   1 -12  11   22.14    7.19
  -1  12 -12  495.47   21.71
   1 -12  12  486.13   21.67
   1 -12  12  526.76   21.90
  -1  11   7   13.78    7.19
   1 -11  -7    2.66    7.38
  -1  11   6    3.46    7.57
   1 -11  -6    0.56    7.57
  -1  11   5    7.52    7.71
   1 -11  -5   11.44    7.85
  -1  11   4  361.17   16.72
   1 -11  -4  318.58   15.41
  -1  11   3    9.48    7.94
   1 -11  -3   11.16    8.41
  -1  11   2  754.65   31.38
   1 -11  -2  609.89   25.54
  -1  11   1    8.27    8.13
   1 -11  -1    2.10    8.17
  -1  11   0   82.38    9.29
   1 -11   0   72.94    9.11
  -1  11  -1   18.73    8.50
   1 -11   1   -6.91    8.22
  -1  11  -2  298.69   14.94
   1 -11   2  296.58   15.46
  -1  11  -3  224.43   13.17
   1 -11   3  220.79   12.84
  -1  11  -4  207.67   12.56
   1 -11   4  202.77   12.94
  -1  11  -5   84.48    9.71
   1 -11   5   86.91    9.71
  -1  11  -6  461.38   20.92
   1 -11   6  497.34   22.14
  -1  11  -7   87.89    9.71
   1 -11   7  110.68    9.99
   1 -11   7   78.17   10.18
  -1  11  -8   38.15    9.48
   1 -11   8   36.43    8.22
   1 -11   8   12.19    8.64
  -1  11  -9    4.86    9.53
   1 -11   9   11.30    8.13
   1 -11   9   -4.30    8.17
  -1  11 -10   73.88    9.76
   1 -11  10   78.92    9.53
   1 -11  10   87.75    8.59
  -1  11 -11  366.96   17.70
   1 -11  11  429.35   19.38
   1 -11  11  417.91   18.59
  -1  11 -12   58.98    9.90
   1 -11  12   76.45    8.36
   1 -11  12   68.04    9.48
  -1  11 -13  295.42   15.18
   1 -11  13  311.39   15.69
   1 -11  13  332.22   15.69
  -1  10   9  685.54   27.79
   1 -10  -9  583.73   24.05
  -1  10   8    6.07    7.80
   1 -10  -8    5.60    7.71
  -1  10   7   81.30    9.01
   1 -10  -7   72.20    8.92
  -1  10   6    9.99    8.22
   1 -10  -6    5.42    8.41
  -1  10   5  263.33   13.78
   1 -10  -5  297.94   15.04
  -1  10   4   35.68    8.36
   1 -10  -4   42.68    8.45
  -1  10   3  268.33   14.15
   1 -10  -3  258.06   13.64
   1 -10  -2  393.58   18.03
  -1  10   1  738.77   30.40
   1 -10  -1  703.75   29.05
  -1  10   0   51.28    8.45
   1 -10   0   86.11    9.48
  -1  10  -1  382.74   17.89
   1 -10   1  373.22   17.56
  -1  10  -2   69.30    9.15
   1 -10   2   60.19    9.11
  -1  10  -3   89.33    9.57
   1 -10   3   69.35    9.20
  -1  10  -4   15.83    7.94
   1 -10   4   20.13    8.55
  -1  10  -5  110.49   10.18
   1 -10   5  114.13    9.90
  -1  10  -6  329.51   16.06
   1 -10   6  338.05   16.90
  -1  10  -7  258.34   14.76
   1 -10   7  227.28   13.54
   1 -10   7  270.85   13.96
  -1  10  -8   14.06    9.01
   1 -10   8    9.25    9.29
   1 -10   8   27.09    8.31
  -1  10  -9   21.48    9.57
   1 -10   9   21.11    7.99
   1 -10   9   35.40    9.15
  -1  10 -10  210.28   13.31
   1 -10  10  262.49   14.38
   1 -10  10  228.59   13.12
  -1  10 -11  178.11   12.33
   1 -10  11  212.53   12.84
   1 -10  11  226.30   12.61
  -1  10 -12  716.83   29.84
   1 -10  12  760.72   31.15
   1 -10  12  736.91   30.21
  -1  10 -13   89.76   10.46
   1 -10  13  131.55   10.97
   1 -10  13  108.53    9.20
  -1  10 -14  221.03   13.22
   1 -10  14  288.51   14.80
   1 -10  14  280.29   14.06
   1 -10  15    1.03    9.06
   1 -10  15    8.45    7.71
  -1   9  10  747.65   30.17
   1  -9 -10  657.05   26.99
  -1   9   9   30.03    8.59
   1  -9  -9   31.52    8.22
  -1   9   8  823.30   33.39
   1  -9  -8  773.80   31.47
  -1   9   7    0.84    8.08
   1  -9  -7    3.18    8.45
  -1   9   6  251.29   13.68
   1  -9  -6  226.02   12.94
  -1   9   5  101.20    9.53
   1  -9  -5   85.60    9.20
  -1   9   4  435.33   19.15
   1  -9  -4  422.39   19.15
  -1   9   3    3.83    7.80
   1  -9  -3   10.41    8.31
  -1   9   2  297.89   15.32
   1  -9  -2  296.68   14.99
  -1   9   1   46.37    8.87
   1  -9  -1   44.78    8.87
  -1   9   0  417.58   19.10
   1  -9   0  439.25   19.52
  -1   9  -1   30.87    9.01
   1  -9   1   28.63    9.11
  -1   9  -2   65.89    8.92
   1  -9   2   66.45    8.92
  -1   9  -3   59.35    9.53
   1  -9   3   34.23    9.25
  -1   9  -4   52.16    9.39
   1  -9   4   43.94    9.39
  -1   9  -5  206.64   13.08
   1  -9   5  182.78   11.35
  -1   9  -6  118.85   10.88
   1  -9   6  137.53   11.07
   1  -9   6  151.72   10.18
  -1   9  -7  738.77   30.63
   1  -9   7  743.44   30.45
   1  -9   7  773.80   31.47
  -1   9  -8   21.71    9.39
   1  -9   8   17.51    8.97
   1  -9   8   17.00    7.85
  -1   9  -9  232.00   13.73
   1  -9   9  246.34   13.92
   1  -9   9  225.09   12.70
  -1   9 -10  382.65   18.59
   1  -9  10  435.42   20.13
   1  -9  10  424.54   19.10
  -1   9 -11  688.34   29.00
   1  -9  11  771.46   31.43
   1  -9  11  787.81   32.46
  -1   9 -12  122.63   11.07
   1  -9  12  140.61   10.93
   1  -9  12  154.99   11.25
  -1   9 -13  417.07   19.47
   1  -9  13  458.96   20.13
   1  -9  13  510.42   22.32
   1  -9  14   36.14    8.36
   1  -9  14   47.40    9.43
   1  -9  15  691.14   28.30
   1  -9  15  698.61   28.91
  -1   8  12   76.49    8.64
   1  -8 -12   63.98    7.75
  -1   8  11  504.35   21.67
   1  -8 -11  420.76   18.68
  -1   8  10   -3.50    8.13
   1  -8 -10   10.13    8.41
  -1   8   9 1158.13   45.62
   1  -8  -9 1035.78   41.09
  -1   8   8   54.17    8.64
   1  -8  -8   45.67    8.55
  -1   8   7  174.65   11.49
   1  -8  -7  179.60   11.39
  -1   8   6   59.87    8.55
   1  -8  -6   72.94    9.01
  -1   8   5   31.38    7.85
   1  -8  -5   26.71    8.27
  -1   8   4   21.67    7.61
   1  -8  -4   12.38    8.27
  -1   8   3  183.62   10.74
   1  -8  -3  164.33   11.02
  -1   8   2  312.65   15.32
   1  -8  -2  299.06   14.90
  -1   8   1  953.12   37.92
   1  -8  -1  986.28   38.99
  -1   8   0  160.50   10.88
   1  -8   0  154.25   10.09
  -1   8  -1   18.49    7.89
   1  -8   1   15.08    7.47
  -1   8  -2  144.49   10.37
   1  -8   2  149.34   10.09
  -1   8  -3  841.04   33.95
   1  -8   3  768.66   31.05
  -1   8  -4  442.24   19.66
   1  -8   4  408.43   18.63
  -1   8  -5   14.15    8.69
   1  -8   5    2.10    7.80
  -1   8  -6  896.15   36.10
   1  -8   6  825.17   33.34
   1  -8   6  916.23   36.57
  -1   8  -7  673.40   28.30
   1  -8   7  660.79   27.55
   1  -8   7  661.25   27.27
  -1   8  -8  920.43   37.22
   1  -8   8  881.67   35.63
   1  -8   8  901.29   36.24
  -1   8  -9   14.99    9.20
   1  -8   9   -4.20    7.99
   1  -8   9   -7.38    8.78
  -1   8 -10   37.17    9.53
   1  -8  10   48.15    8.41
   1  -8  10   55.90    9.25
  -1   8 -11   -1.77    9.53
   1  -8  11   -4.58    8.03
   1  -8  11    9.95    8.92
  -1   8 -12  283.88   15.32
   1  -8  12  354.49   17.28
   1  -8  12  344.45   16.58
  -1   8 -13   54.87    9.11
   1  -8  13   53.10    9.20
   1  -8  13   45.72    9.11
   1  -8  14  628.10   26.29
   1  -8  14  602.41   25.54
   1  -8  15   -7.71    8.87
   1  -8  15   15.18    8.59
   1  -8  16  133.84   11.25
   1  -8  16  119.18   10.13
  -1   7  13   14.48    7.75
   1  -7 -13   28.77    7.66
  -1   7  12  212.67   12.24
   1  -7 -12  168.63   11.39
  -1   7  11   53.66    8.50
   1  -7 -11   45.95    8.55
  -1   7  10  563.65   24.10
   1  -7 -10  515.09   22.28
  -1   7   9   16.62    8.17
   1  -7  -9   18.21    8.08
  -1   7   8 1507.90   58.70
   1  -7  -8 1397.23   54.40
  -1   7   7  354.54   16.39
   1  -7  -7  348.37   16.44
  -1   7   6   16.44    7.99
   1  -7  -6   10.23    8.13
  -1   7   5  150.56   10.32
   1  -7  -5  139.49   10.55
  -1   7   4   85.27    8.78
   1  -7  -4   72.15    8.92
  -1   7   3  187.87   10.65
   1  -7  -3  157.66   10.37
  -1   7   2  294.81   14.48
  -1   7   1 1378.08   53.66
   1  -7  -1 1199.69   46.70
  -1   7   0 1296.82   50.81
   1  -7   0 1089.48   42.78
  -1   7  -1 1773.15   68.41
   1  -7   1 1585.89   61.32
  -1   7  -2 1470.08   57.11
   1  -7   2 1250.13   48.66
  -1   7  -3  786.87   32.04
   1  -7   3  666.39   27.32
  -1   7  -4  393.76   18.03
   1  -7   4  320.40   15.22
  -1   7  -5  467.92   21.01
   1  -7   5  459.66   20.64
  -1   7  -6  318.02   15.69
   1  -7   6  280.66   14.01
   1  -7   6  303.87   14.99
  -1   7  -7  657.52   27.46
   1  -7   7  645.38   26.66
   1  -7   7  660.32   27.04
  -1   7  -8  513.22   22.46
   1  -7   8  488.00   21.39
   1  -7   8  504.35   21.62
  -1   7  -9   80.28    9.67
   1  -7   9   84.71    9.01
   1  -7   9   87.33    9.76
  -1   7 -10   84.66   10.04
   1  -7  10   85.46    9.39
   1  -7  10   77.24    9.53
  -1   7 -11  227.19   13.64
   1  -7  11  244.14   13.78
   1  -7  11  231.35   12.70
  -1   7 -12   68.41    9.62
   1  -7  12   81.35    9.90
   1  -7  12   75.47    9.34
   1  -7  13  449.10   20.22
   1  -7  13  492.67   21.90
   1  -7  14   19.01    8.87
   1  -7  14   18.26    8.83
   1  -7  15  508.08   22.09
   1  -7  15  454.57   20.59
   1  -7  16  107.41   10.32
   1  -7  16   99.37   10.41
   1  -7  17  116.23   10.41
   1  -7  17  101.52    9.99
  -1   6  14  173.72   10.79
   1  -6 -14  174.84   10.69
  -1   6  13  868.60   34.84
   1  -6 -13  801.35   32.36
  -1   6  12  273.65   14.15
   1  -6 -12  257.45   13.64
  -1   6  11 1252.93   49.22
   1  -6 -11 1130.58   44.50
  -1   6  10  183.71   11.67
   1  -6 -10  162.42   10.13
  -1   6   9  208.98   11.95
   1  -6  -9  194.22   11.86
  -1   6   8 1062.86   41.98
   1  -6  -8 1015.70   40.35
  -1   6   7  980.21   39.09
   1  -6  -7  900.82   36.14
  -1   6   6   60.52    8.17
   1  -6  -6   46.98    8.31
  -1   6   5    1.07    6.49
   1  -6  -5   13.64    7.66
  -1   6   4  848.05   33.90
   1  -6  -4  733.64   29.70
  -1   6   3  428.18   18.82
   1  -6  -3  385.12   17.28
  -1   6   2  592.14   24.80
  -1   6   1  265.62   13.64
   1  -6  -1  231.86   12.28
  -1   6   0 1913.72   73.50
   1  -6   0 1884.76   72.38
  -1   6  -1   39.69    8.50
   1  -6   1   36.99    7.38
  -1   6  -2  704.22   28.91
   1  -6   2  574.39   23.82
  -1   6  -3  583.73   24.70
   1  -6   3  509.95   21.62
  -1   6  -4 1199.69   46.98
   1  -6   4 1076.87   42.45
  -1   6  -5  268.05   14.01
   1  -6   5  230.93   12.56
   1  -6   5  244.14   12.98
  -1   6  -6  511.82   22.00
   1  -6   6  456.43   19.85
   1  -6   6  444.25   19.47
  -1   6  -7   41.56    8.64
   1  -6   7   47.21    8.36
   1  -6   7   58.70    8.17
  -1   6  -8  558.98   23.86
   1  -6   8  567.86   23.72
   1  -6   8  571.13   23.96
  -1   6  -9  263.15   14.15
   1  -6   9  288.36   14.24
   1  -6   9  282.25   14.38
  -1   6 -10  125.67   10.55
   1  -6  10  133.23   10.51
   1  -6  10  132.53    9.53
  -1   6 -11   19.15    8.78
   1  -6  11   28.53    8.97
   1  -6  11   22.98    8.50
   1  -6  12  427.06   19.61
   1  -6  12  375.69   17.79
   1  -6  13   20.31    9.20
   1  -6  13   41.56    8.92
   1  -6  14  277.62   14.90
   1  -6  14  292.66   15.08
   1  -6  15   78.73   10.27
   1  -6  15   79.01    9.76
   1  -6  16  249.37   13.96
   1  -6  16  245.17   13.64
  -1   5  15   11.30    7.52
   1  -5 -15   20.41    6.68
  -1   5  14  108.15    9.57
   1  -5 -14  123.38    9.53
  -1   5  13  120.02   10.37
   1  -5 -13  132.81   10.18
  -1   5  12   89.94    9.67
   1  -5 -12   87.19    9.29
  -1   5  11  237.84   13.17
   1  -5 -11  237.51   13.26
  -1   5  10  100.78    9.81
   1  -5 -10   94.00    8.87
  -1   5   9  968.07   38.43
   1  -5  -9 1011.50   40.11
  -1   5   8 1550.87   60.15
   1  -5  -8 1567.68   60.76
  -1   5   7   99.33    8.73
   1  -5  -7   94.28    8.69
  -1   5   6  234.15   12.24
   1  -5  -6  238.30   12.42
  -1   5   5  101.80    9.06
   1  -5  -5   87.14    8.36
  -1   5   4  432.34   19.05
   1  -5  -4  368.08   16.67
  -1   5   3   23.40    7.47
   1  -5  -3   26.29    7.10
  -1   5   2   11.91    7.24
  -1   5   1 3201.67  121.79
   1  -5  -1 2921.47  111.19
  -1   5   0  985.81   38.90
   1  -5   0  900.35   35.58
  -1   5  -1 5262.95  199.50
   1  -5   1 4642.79  175.96
  -1   5  -2  462.41   20.03
   1  -5   2  375.32   16.81
  -1   5  -3  617.36   25.36
   1  -5   3  610.82   25.22
  -1   5  -4  233.12   12.61
   1  -5   4  217.66   11.86
  -1   5  -5 1059.13   41.84
   1  -5   5 1004.49   39.37
   1  -5   5 1010.56   39.74
  -1   5  -6   30.35    7.80
   1  -5   6   13.22    7.43
   1  -5   6   16.48    7.66
  -1   5  -7  667.79   27.55
   1  -5   7  702.82   28.63
   1  -5   7  664.99   27.23
  -1   5  -8  131.36   10.13
   1  -5   8  132.39    9.62
   1  -5   8  126.97    9.29
  -1   5  -9 1499.50   58.33
   1  -5   9 1541.53   59.68
   1  -5   9 1489.22   57.67
  -1   5 -10  635.10   25.87
   1  -5  10  586.07   24.75
   1  -5  10  583.73   24.42
  -1   5 -11   94.75    8.36
   1  -5  11   82.42    8.92
   1  -5  11   93.96    9.67
  -1   5 -12    9.20    7.05
   1  -5  12    3.41    8.59
   1  -5  12    6.40    8.59
  -1   5 -13  311.39   14.85
   1  -5  13  290.51   15.13
   1  -5  13  281.36   14.90
  -1   5 -14   31.85    8.50
   1  -5  14   27.46    8.59
   1  -5  14   46.28    9.43
  -1   5 -15   78.92    8.97
   1  -5  15   70.42    9.39
   1  -5  15   57.95    9.99
  -1   5 -16  149.11   10.18
   1  -5  16  114.51   10.79
   1  -5  16  121.00   10.27
  -1   5 -17  107.36    8.92
   1  -5  17  102.97   10.46
   1  -5  17  106.80   10.32
  -1   4  15  165.13   11.91
   1  -4 -15  186.70   10.97
  -1   4  14   19.47    8.69
   1  -4 -14   25.36    7.94
  -1   4  13  223.87   13.26
   1  -4 -13  207.67   12.14
  -1   4  12   20.31    8.41
   1  -4 -12   13.50    7.71
  -1   4  11  100.64    9.76
   1  -4 -11  119.78    9.71
  -1   4  10  218.97   12.52
   1  -4 -10  217.15   12.05
  -1   4   9  250.03   13.17
   1  -4  -9  240.50   12.66
  -1   4   8 3020.94  115.21
   1  -4  -8 2918.21  111.28
  -1   4   7 1280.95   50.06
   1  -4  -7 1265.54   49.27
  -1   4   6  409.92   18.21
   1  -4  -6  377.37   16.76
  -1   4   5  863.93   34.37
   1  -4  -5  837.78   33.34
   1  -4  -4 9288.39  350.80
  -1   4   3 3785.40  143.83
   1  -4  -3 2810.80  106.99
  -1   4   2 1082.48   42.22
   1  -4  -2 1028.77   40.35
  -1   4   1 1335.12   51.70
   1  -4  -1 1192.69   46.28
  -1   4   0 1590.09   61.27
   1  -4   0 1365.01   52.82
  -1   4  -1 1830.59   70.38
   1  -4   1 1506.04   58.09
  -1   4  -2 4566.21  173.11
   1  -4   2 3940.44  149.53
  -1   4  -3  608.95   25.12
   1  -4   3  540.30   22.42
  -1   4  -4  365.09   16.48
   1  -4   4  315.08   14.48
   1  -4   4  348.61   15.74
  -1   4  -5   94.05    9.01
   1  -4   5   84.43    8.45
   1  -4   5   73.04    7.94
  -1   4  -6 1558.34   60.15
   1  -4   6 1497.63   57.72
   1  -4   6 1565.81   60.38
  -1   4  -7  373.96   16.20
  -1   4  -7  317.13   15.13
   1  -4   7  322.27   15.04
   1  -4   7  306.95   14.66
  -1   4  -8  322.08   14.76
  -1   4  -8  310.22   15.04
  -1   4  -9  410.16   17.47
   1  -4   9  335.72   15.50
   1  -4   9  367.85   16.48
  -1   4 -10  655.18   26.66
   1  -4  10  572.53   24.19
   1  -4  10  555.25   23.35
  -1   4 -11 1242.65   48.43
   1  -4  11 1091.35   43.15
   1  -4  11 1195.96   46.98
  -1   4 -12  303.78   14.48
   1  -4  12  283.37   14.52
   1  -4  12  255.44   14.01
  -1   4 -13  509.95   21.67
   1  -4  13  447.84   20.36
   1  -4  13  449.15   20.08
  -1   4 -14  155.27   10.55
   1  -4  14  149.39   10.79
   1  -4  14  138.79   11.07
  -1   4 -15   14.01    8.13
   1  -4  15   20.83   10.04
   1  -4  15   18.40    8.27
  -1   4 -16   71.12    8.22
   1  -4  16   64.12    9.15
   1  -4  16   57.30    9.71
  -1   4 -17   58.93    8.31
   1  -4  17   48.38    9.06
   1  -4  17   47.96    8.97
  -1   3  16  112.50    9.90
   1  -3 -16  105.77    8.45
  -1   3  15    5.23    8.59
   1  -3 -15   25.31    7.66
  -1   3  14   28.58    9.11
   1  -3 -14   18.07    7.75
  -1   3  13  144.30   10.93
   1  -3 -13  135.57   10.23
  -1   3  12  164.05   11.49
   1  -3 -12  189.78   11.44
  -1   3  11 1836.66   70.98
   1  -3 -11 1826.86   70.42
  -1   3  10  924.17   36.89
   1  -3 -10  894.75   35.77
  -1   3   9  981.14   38.85
   1  -3  -9  941.91   37.31
  -1   3   8  993.28   39.13
   1  -3  -8  987.21   39.04
  -1   3   7 2124.33   81.49
   1  -3  -7 2044.47   78.41
  -1   3   6  119.50    8.83
   1  -3  -6  111.33    8.50
  -1   3   5   10.65    7.19
   1  -3  -5   -1.54    6.77
  -1   3   4   71.36    7.80
   1  -3  -4   65.28    7.61
  -1   3   2  377.42   17.00
   1  -3  -2  339.55   15.50
  -1   3   1 3989.94  151.49
   1  -3  -1 3826.03  145.33
  -1   3   0 1915.12   73.74
   1  -3   0 1813.78   69.91
  -1   3  -1 1529.85   59.35
   1  -3   1 1421.51   55.29
  -1   3  -2    3.50    8.08
   1  -3   2   -0.79    8.31
  -1   3  -3 3692.00  140.19
   1  -3   3 3481.39  132.25
   1  -3   3 3461.31  131.46
  -1   3  -4   36.66    7.57
   1  -3   4   29.51    6.96
   1  -3   4   34.18    7.24
  -1   3  -5  678.07   27.46
  -1   3  -5  710.76   28.25
   1  -3   5  630.90   25.45
   1  -3   5  589.81   24.05
  -1   3  -6 1291.22   49.87
  -1   3  -6 1228.64   47.87
   1  -3   6 1157.66   45.02
   1  -3   6 1209.03   47.12
  -1   3  -7 1612.04   61.92
   1  -3   7 1367.81   52.91
   1  -3   7 1435.52   55.52
  -1   3  -8 3139.56  119.32
   1  -3   8 2727.21  104.00
   1  -3   8 2676.31  102.08
  -1   3  -9  213.69   10.97
   1  -3   9  200.01   11.16
   1  -3   9  161.53   10.18
  -1   3 -10   32.64    6.96
   1  -3  10   20.55    7.71
   1  -3  10   26.95    7.47
  -1   3 -11  143.13    9.39
   1  -3  11  115.77    9.62
   1  -3  11  111.42    9.62
  -1   3 -12  294.95   14.06
   1  -3  12  276.22   14.48
   1  -3  12  266.93   14.15
  -1   3 -13  325.68   15.13
   1  -3  13  284.63   14.62
   1  -3  13  288.65   15.36
  -1   3 -14   86.49    9.01
   1  -3  14   74.34    9.20
   1  -3  14   77.24   10.60
  -1   3 -15   20.69    8.13
   1  -3  15   21.86    8.45
   1  -3  15   15.60    9.11
  -1   3 -16   22.37    7.43
   1  -3  16   10.32    8.55
   1  -3  16    6.26    9.20
  -1   3 -17   93.49    8.59
   1  -3  17   58.33    9.53
   1  -3  17   73.36    9.29
  -1   2  17  285.89   14.20
  -1   2  17  300.09   15.13
   1  -2 -17  301.02   13.96
  -1   2  16   -4.58    8.27
   1  -2 -16    5.88    6.40
  -1   2  15  227.28   13.82
   1  -2 -15  246.57   12.84
  -1   2  14  118.99   10.46
   1  -2 -14  110.49    9.29
  -1   2  13  200.29   12.28
   1  -2 -13  220.09   12.00
  -1   2  12    3.60    8.22
   1  -2 -12    0.51    7.24
  -1   2  11    2.90    8.22
   1  -2 -11   -3.83    7.52
  -1   2  10 1546.66   59.96
   1  -2 -10 1550.40   59.96
  -1   2   9  639.31   26.24
   1  -2  -9  690.21   28.02
  -1   2   8  391.06   17.89
   1  -2  -8  399.74   17.61
  -1   2   7    0.00    6.96
   1  -2  -7   -1.54    7.52
  -1   2   6  202.53   11.11
   1  -2  -6  204.54   11.30
  -1   2   5  240.87   12.24
   1  -2  -5  229.34   11.39
  -1   2   4   23.91    7.29
   1  -2  -4   23.30    6.91
   1  -2  -3 1526.58   58.93
  -1   2   2   32.04    8.31
   1  -2  -2   32.13    8.31
  -1   2   1  246.06   12.80
   1  -2  -1  234.66   12.33
  -1   2   0 1458.40   56.04
   1  -2   0 1220.24   47.07
  -1   2  -3  530.03   21.76
  -1   2  -3  503.41   21.15
   1  -2   3  484.27   20.17
   1  -2   3  446.63   19.15
  -1   2  -5   16.25    6.40
   1  -2   5    4.81    6.68
   1  -2   5    5.65    6.26
   1  -2   6 6850.71  259.13
   1  -2   6 6958.12  263.10
  -1   2  -7   -6.54    6.40
   1  -2   7   -2.80    6.44
   1  -2   7   -3.50    7.05
  -1   2  -8  223.97   11.30
   1  -2   8  188.62   10.93
   1  -2   8  184.97   11.07
  -1   2  -9  297.98   14.01
   1  -2   9  273.98   13.50
   1  -2   9  263.89   13.12
  -1   2 -10  207.11   11.11
   1  -2  10  168.77   10.46
   1  -2  10  186.14   11.39
  -1   2 -11  618.76   25.36
   1  -2  11  512.29   22.00
   1  -2  11  564.59   23.91
  -1   2 -12  363.97   16.48
   1  -2  12  370.13   17.61
   1  -2  12  338.47   16.16
  -1   2 -13  181.89   10.60
   1  -2  13  146.35   10.65
   1  -2  13  143.23   11.53
  -1   2 -14   72.48    8.55
   1  -2  14   45.81    8.64
   1  -2  14   63.04    9.81
  -1   2 -15  322.92   15.55
   1  -2  15  266.42   13.96
   1  -2  15  275.01   14.71
  -1   2 -16    9.25    7.38
   1  -2  16   -8.31    9.15
   1  -2  16    4.62    8.50
  -1   2 -17   -9.53    7.24
   1  -2  17    2.15    8.55
   1  -2  17   -7.80    8.45
  -1   1  17   90.27    9.48
  -1   1  17  110.40    9.99
   1  -1 -17  114.41    8.59
  -1   1  16  230.65   12.84
  -1   1  16  245.82   14.15
   1  -1 -16  234.19   11.95
   1  -1 -15  429.96   19.05
  -1   1  14   53.47    9.15
   1  -1 -14   61.60    8.08
  -1   1  13   44.97    9.67
   1  -1 -13   30.07    7.61
  -1   1  12  431.12   19.47
   1  -1 -12  445.88   19.38
  -1   1  11 1823.59   70.38
   1  -1 -11 1823.59   70.38
  -1   1  10  152.75   10.32
   1  -1 -10  162.14    9.81
  -1   1   9  242.93   12.47
   1  -1  -9  286.96   13.73
  -1   1   8  125.43    9.34
   1  -1  -8  129.40    9.53
  -1   1   7  433.97   18.73
   1  -1  -7  473.06   19.99
  -1   1   6    0.70    6.91
   1  -1  -6    7.38    7.57
  -1   1   5   -3.41    6.86
   1  -1  -5   -4.62    7.57
  -1   1   4  439.06   18.82
   1  -1  -4  439.58   19.15
  -1   1   3  611.75   24.66
   1  -1  -3  506.21   21.20
  -1   1   2   28.53    6.21
   1  -1  -2   33.81    6.12
  -1   1   0  927.90   35.26
   1  -1   0  993.28   37.78
  -1   1  -1  941.91   35.91
   1  -1   1  891.95   34.09
   1  -1   2 2768.77  105.07
  -1   1  -4  184.51    9.99
   1  -1   4  162.93    9.71
   1  -1   4  165.87    9.29
   1  -1   5 4614.77  174.70
   1  -1   5 4557.80  172.65
   1  -1   6 7046.84  266.51
  -1   1  -7 2622.60   99.84
   1  -1   7 2636.61  100.54
   1  -1   7 2741.22  104.42
  -1   1  -8  433.32   18.45
   1  -1   8  412.82   18.12
   1  -1   8  421.04   18.45
  -1   1  -9   44.41    6.72
   1  -1   9   31.71    7.57
   1  -1   9   35.96    7.57
  -1   1 -10   72.94    7.80
   1  -1  10   61.83    8.03
   1  -1  10   62.25    7.99
  -1   1 -11  249.60   12.66
   1  -1  11  199.08   11.72
   1  -1  11  229.38   12.89
  -1   1 -12  788.74   31.57
   1  -1  12  705.15   29.09
   1  -1  12  708.42   29.37
  -1   1 -13  118.29    9.43
   1  -1  13   79.81    9.34
   1  -1  13  111.89   10.46
  -1   1 -14   83.96    8.87
   1  -1  14   69.25    9.76
   1  -1  14   76.03    9.06
  -1   1 -15    1.12    7.61
   1  -1  15    2.29    9.01
   1  -1  15    1.12    8.27
  -1   1 -16  301.39   14.52
   1  -1  16  230.93   13.40
   1  -1  16  237.56   13.31
  -1   1 -17   14.66    7.99
   1  -1  17   17.84    8.59
   1  -1  17   21.01    8.92
  -1   0  17   21.62    8.55
  -1   0  17   21.57    8.45
   1   0 -17   32.04    7.10
  -1   0  16  244.70   13.78
  -1   0  16  215.98   12.70
   1   0 -16  262.77   13.78
  -1   0  15   85.74    9.90
  -1   0  15   77.66    9.81
   1   0 -15  111.38    9.85
  -1   0  14  559.92   24.14
  -1   0  14  605.68   25.73
   1   0 -14  561.32   23.54
  -1   0  13   -4.16    8.36
  -1   0  13    6.91    8.78
   1   0 -13   15.27    6.49
  -1   0  12   -4.76    8.36
   1   0 -12   12.80    6.91
  -1   0  11  109.18    9.57
   1   0 -11  120.72    8.45
  -1   0  10  202.86   11.77
   1   0 -10  241.53   12.61
  -1   0   9  208.79   12.00
   1   0  -9  216.17   11.25
  -1   0   8 1938.47   74.34
   1   0  -8 1977.23   75.75
  -1   0   7  291.96   14.01
   1   0  -7  290.61   13.92
  -1   0   6   15.36    7.38
   1   0  -6   14.01    7.29
  -1   0   5   24.00    7.38
   1   0  -5   32.46    7.47
  -1   0   4   58.65    9.01
   1   0  -4   58.51    9.29
  -1   0   3 2543.21   96.71
   1   0  -3 2399.38   91.39
  -1   0   2 1003.56   38.48
   1   0  -2  978.81   37.64
  -1   0   1  331.09   13.08
  -1   0   1  321.15   12.56
   1   0  -1  323.06   12.66
  -1   0  -2 1456.07   55.62
   1   0   2 1586.82   60.47
   1   0   4 2109.38   80.42
  -1   0  -5 2154.68   82.10
   1   0   5 2158.88   82.33
  -1   0  -6 1275.81   49.36
   1   0   6 1358.93   52.40
  -1   0  -7 2433.01   92.74
   1   0   7 2414.79   92.14
  -1   0  -8   72.80    7.38
   1   0   8   63.88    7.85
  -1   0  -9  981.14   38.48
   1   0   9 1004.02   39.60
  -1   0 -10  260.63   12.89
   1   0  10  290.23   14.29
  -1   0 -11  202.72   10.74
   1   0  11  184.18   11.25
  -1   0 -12    2.01    6.40
   1   0  12   -1.59    8.03
  -1   0 -13  368.13   16.76
   1   0  13  368.64   17.47
   1   0  13  391.01   18.31
  -1   0 -14   89.80    9.53
   1   0  14   81.54    9.20
   1   0  14   75.42    9.90
  -1   0 -15  451.76   19.94
   1   0  15  381.81   17.75
   1   0  15  403.94   18.91
  -1   0 -16   -4.58    7.43
   1   0  16    1.31    8.92
   1   0  16    0.14    8.59
  -1  -1  18  300.27   14.85
  -1  -1  18  273.65   14.06
   1   1 -18  342.12   15.41
  -1  -1  17  298.50   14.71
  -1  -1  17  270.76   14.80
   1   1 -17  314.28   14.80
  -1  -1  16   25.92    9.01
  -1  -1  16   35.54    8.97
   1   1 -16   43.90    7.75
  -1  -1  15  318.11   15.83
  -1  -1  15  314.84   16.02
   1   1 -15  330.72   16.02
  -1  -1  14  179.70   12.05
  -1  -1  14  153.22   11.95
   1   1 -14  181.14   11.30
  -1  -1  13  431.68   19.75
  -1  -1  13  411.74   19.05
   1   1 -13  474.93   20.36
  -1  -1  12   23.12    7.85
  -1  -1  12   13.64    8.59
   1   1 -12   32.36    7.38
  -1  -1  11   36.52    8.17
  -1  -1  11   59.26    8.73
   1   1 -11   44.88    7.24
  -1  -1  10  186.19   11.44
  -1  -1  10  204.21   11.77
   1   1 -10  230.41   12.14
  -1  -1   9 1174.47   46.14
  -1  -1   9 1208.10   47.35
   1   1  -9 1271.14   49.36
  -1  -1   8    1.91    7.66
  -1  -1   8    0.05    7.80
   1   1  -8    2.85    7.24
  -1  -1   7 4903.37  185.86
  -1  -1   7 4926.72  186.80
   1   1  -7 5272.29  199.64
  -1  -1   6  180.91   10.55
  -1  -1   6  206.78   11.77
   1   1  -6  212.99   11.35
  -1  -1   5   45.53    8.17
  -1  -1   5   51.00    8.83
   1   1  -5   48.99    7.99
  -1  -1   4   65.33    8.59
  -1  -1   4   49.69    9.99
   1   1  -4   64.21    8.92
  -1  -1   3 5603.85  212.11
  -1  -1   2 1346.79   51.51
  -1  -1   2 1358.93   52.16
   1   1  -2 1327.18   50.85
   1   1  -2 1359.87   52.12
  -1  -1   1 1264.14   48.29
   1   1  -1 1392.56   53.14
  -1  -1   0  894.28   34.42
   1   1   0  970.40   37.31
   1   1   1 2292.44   87.19
  -1  -1  -2 1579.35   60.62
   1   1   2 1713.84   65.71
  -1  -1  -3  422.53   17.93
   1   1   3  459.19   19.33
  -1  -1  -4 2115.92   80.65
   1   1   4 2137.40   81.58
  -1  -1  -5  352.76   15.55
   1   1   5  363.69   15.97
  -1  -1  -6  844.78   33.48
   1   1   6  848.98   33.39
  -1  -1  -7  912.49   36.05
   1   1   7  891.48   35.35
  -1  -1  -8 4067.46  154.43
   1   1   8 3952.58  150.04
  -1  -1  -9    4.11    6.35
   1   1   9    4.02    7.38
  -1  -1 -10  435.79   18.82
   1   1  10  433.60   19.29
  -1  -1 -11  243.95   12.33
   1   1  11  236.16   13.08
  -1  -1 -12 2874.78  109.70
   1   1  12 2836.48  108.57
  -1  -1 -13   15.88    7.33
   1   1  13    5.00    8.97
  -1  -1 -14 1204.36   47.07
   1   1  14 1214.17   47.87
  -1  -1 -15  241.71   12.42
   1   1  15  240.45   13.64
   1   1  15  207.39   12.14
  -1  -1 -16  153.55    9.67
   1   1  16  143.18   10.83
   1   1  16  134.82   10.55
  -1  -2  18  446.81   19.85
  -1  -2  18  459.00   20.13
   1   2 -18  495.94   20.87
  -1  -2  17  119.08   10.04
  -1  -2  17  106.66   10.13
   1   2 -17  107.73    8.92
  -1  -2  16  120.72   10.18
  -1  -2  16  115.30   10.60
   1   2 -16  140.00    9.76
  -1  -2  15   22.60    9.57
  -1  -2  15   23.30    8.83
   1   2 -15   32.88    7.75
  -1  -2  14  733.17   30.54
  -1  -2  14  648.18   27.18
   1   2 -14  758.39   30.82
  -1  -2  13   67.34    9.48
  -1  -2  13   55.15    9.29
   1   2 -13   67.67    8.27
  -1  -2  12   17.37    8.55
  -1  -2  12    2.80    8.50
   1   2 -12    2.71    7.05
  -1  -2  11   22.70    7.61
  -1  -2  11   27.60    8.27
   1   2 -11   34.23    7.10
  -1  -2  10  166.06   10.93
  -1  -2  10  148.41    9.85
   1   2 -10  196.09   11.11
  -1  -2   9  359.44   16.62
  -1  -2   9  340.99   16.25
   1   2  -9  382.93   16.86
  -1  -2   8 2978.91  113.43
  -1  -2   8 2923.34  111.38
   1   2  -8 3224.08  122.58
  -1  -2   7  820.96   32.69
  -1  -2   7  831.71   33.48
   1   2  -7  933.98   36.75
  -1  -2   6  189.18   11.02
  -1  -2   6  193.80   11.49
   1   2  -6  186.47   10.97
   1   2  -6  206.78   11.35
  -1  -2   5   55.95    8.69
  -1  -2   5   52.12    8.22
   1   2  -5   72.99    9.06
   1   2  -5   67.34    7.75
  -1  -2   4   43.94    9.25
  -1  -2   4   58.09    8.31
   1   2  -4   48.38    9.34
   1   2  -4   55.85    8.13
  -1  -2   3  815.83   33.25
  -1  -2   3  870.00   34.65
  -1  -2   2  122.54   10.32
   1   2  -2  135.01    8.83
  -1  -2   1 1070.34   41.94
   1   2  -1 1145.52   44.41
  -1  -2   0  685.54   28.02
   1   2   0  792.01   31.71
  -1  -2  -1  115.77    9.29
   1   2   1  124.45    9.81
  -1  -2  -2  204.96   11.44
   1   2   2  235.97   12.52
  -1  -2  -3   41.89    6.63
   1   2   3   45.90    7.38
  -1  -2  -4 1005.89   39.27
   1   2   4 1089.95   42.50
  -1  -2  -5 1576.08   60.66
   1   2   5 1591.49   61.18
  -1  -2  -6  422.16   18.12
   1   2   6  428.97   18.68
  -1  -2  -7 2588.51   98.72
   1   2   7 2636.61  100.59
  -1  -2  -8  427.01   18.31
   1   2   8  452.28   19.66
  -1  -2  -9 3061.57  116.70
   1   2   9 3129.28  119.27
  -1  -2 -10  190.39   10.79
   1   2  10  176.38   10.79
  -1  -2 -11  112.36    8.92
   1   2  11  117.26    9.95
  -1  -2 -12   11.67    7.52
   1   2  12   14.80    8.36
  -1  -2 -13 2108.45   81.07
   1   2  13 2116.39   81.44
  -1  -2 -14   33.81    7.52
   1   2  14   32.69    8.92
  -1  -2 -15   83.54    8.03
   1   2  15   89.85    9.62
  -1  -2 -16    7.29    7.05
   1   2  16   21.57    8.83
  -1  -3  18  139.96   10.51
  -1  -3  18  130.10   10.37
   1   3 -18  178.39   10.69
   1   3 -17  240.03   12.61
  -1  -3  16  355.24   17.28
  -1  -3  16  326.47   16.25
   1   3 -16  369.81   17.09
  -1  -3  15  179.28   12.42
  -1  -3  15  168.49   11.86
   1   3 -15  197.30   11.53
  -1  -3  14    8.55    9.20
  -1  -3  14   21.43    9.06
   1   3 -14   17.93    7.85
  -1  -3  13   70.05    9.20
  -1  -3  13   93.77    9.39
   1   3 -13   88.17    8.22
  -1  -3  12   15.18    8.27
  -1  -3  12    4.25    8.55
   1   3 -12   15.83    7.85
  -1  -3  11  161.76   10.46
  -1  -3  11  188.80   11.35
   1   3 -11  191.65   11.07
  -1  -3  10  120.95    9.20
  -1  -3  10  129.26   10.27
   1   3 -10  155.41   10.04
  -1  -3   9  382.28   17.56
  -1  -3   9  337.26   15.97
   1   3  -9  403.66   17.61
  -1  -3   8   12.70    7.80
  -1  -3   8   21.57    7.94
   1   3  -8    6.16    7.33
  -1  -3   7  836.84   33.58
  -1  -3   7  855.05   34.09
   1   3  -7  920.43   36.80
   1   3  -7  937.24   36.94
  -1  -3   6  347.21   15.92
  -1  -3   6  323.67   15.36
   1   3  -6  390.17   16.95
   1   3  -6  397.50   18.21
  -1  -3   5   41.89    8.03
  -1  -3   5   37.36    8.27
   1   3  -5   42.73    7.24
   1   3  -5   51.88    8.83
  -1  -3   4  857.39   33.90
  -1  -3   4  824.70   32.83
   1   3  -4  900.82   35.82
  -1  -3   3  740.18   29.84
  -1  -3   3  726.17   29.28
  -1  -3   2   33.20    8.59
   1   3  -2   55.48    9.34
  -1  -3   1 2025.79   77.85
   1   3  -1 2277.03   87.23
  -1  -3   0  607.55   25.17
   1   3   0  707.95   29.09
  -1  -3  -1 1189.42   46.23
   1   3   1 1328.11   51.56
  -1  -3  -2 4679.22  177.32
   1   3   2 4693.23  177.74
  -1  -3  -3 1221.64   47.49
   1   3   3 1344.92   51.98
  -1  -3  -4 2065.49   79.06
   1   3   4 2205.12   84.20
  -1  -3  -5 2966.31  112.92
   1   3   5 3061.57  116.51
  -1  -3  -6 2061.28   78.92
   1   3   6 2136.00   81.91
  -1  -3  -7  748.11   30.03
   1   3   7  766.33   30.91
  -1  -3  -8 3855.92  146.59
   1   3   8 3858.72  146.77
  -1  -3  -9   85.46    8.08
   1   3   9   69.07    8.78
  -1  -3 -10  109.60    8.87
   1   3  10  115.95    9.57
  -1  -3 -11  136.17   10.04
   1   3  11  158.03   11.02
  -1  -3 -12  440.51   19.52
   1   3  12  442.84   20.31
  -1  -3 -13    4.62    7.52
   1   3  13   16.86    8.83
  -1  -3 -14   18.40    7.57
   1   3  14   15.46    8.92
  -1  -3 -15  180.54   10.55
   1   3  15  136.73   10.88
  -1  -4  18   89.19    9.20
  -1  -4  18   96.06    9.76
   1   4 -18   98.81    8.87
  -1  -4  17   25.54    9.34
  -1  -4  17    9.39    8.59
   1   4 -17   25.40    7.47
  -1  -4  16  602.88   25.82
  -1  -4  16  582.80   24.89
   1   4 -16  652.38   26.81
  -1  -4  15    0.98    9.11
  -1  -4  15   -5.60    8.41
   1   4 -15  -11.30    8.13
  -1  -4  14  501.08   22.32
  -1  -4  14  476.33   21.15
   1   4 -14  499.21   21.48
  -1  -4  13    1.03    8.59
  -1  -4  13   -0.23    7.80
   1   4 -13    5.14    7.05
  -1  -4  12  446.39   20.17
  -1  -4  12  430.28   19.24
   1   4 -12  476.33   20.55
  -1  -4  11   46.19    8.08
  -1  -4  11   59.35    8.87
   1   4 -11   54.87    7.94
  -1  -4  10  527.23   22.32
  -1  -4  10  532.37   22.56
   1   4 -10  601.48   24.56
  -1  -4   9 1546.66   59.87
  -1  -4   9 1706.37   65.89
   1   4  -9 1808.18   69.53
   1   4  -9 1719.45   66.55
  -1  -4   8 1738.60   67.06
  -1  -4   8 1741.40   67.11
   1   4  -8 1790.90   68.74
   1   4  -8 1833.86   70.75
  -1  -4   7   29.79    8.03
  -1  -4   7   18.91    7.52
   1   4  -7   37.50    8.41
   1   4  -7   10.69    7.33
  -1  -4   6   17.89    7.99
  -1  -4   6   28.86    7.94
   1   4  -6   20.59    8.22
  -1  -4   5  976.47   38.43
  -1  -4   5  992.82   39.18
   1   4  -5 1096.95   43.24
  -1  -4   4  855.99   34.37
  -1  -4   4  908.76   35.96
   1   4  -4  947.99   37.69
  -1  -4   3  735.51   29.65
   1   4  -3  911.09   36.57
  -1  -4   2  167.09   10.55
   1   4  -2  181.99   11.16
  -1  -4   1   51.79    7.80
   1   4  -1   55.38    8.55
  -1  -4   0  869.06   34.46
   1   4   0  950.32   37.73
  -1  -4  -1 4702.57  178.20
   1   4   1 5304.98  200.99
  -1  -4  -2   79.76    8.41
   1   4   2   80.74    8.59
  -1  -4  -3  118.19    8.97
   1   4   3  141.59    9.43
  -1  -4  -4 1382.75   53.70
   1   4   4 1530.32   59.31
  -1  -4  -5 1117.97   43.80
   1   4   5 1249.66   48.71
  -1  -4  -6    5.28    7.66
   1   4   6    5.09    7.24
  -1  -4  -7  591.21   24.75
   1   4   7  604.28   25.17
  -1  -4  -8  618.29   25.59
   1   4   8  615.49   25.50
  -1  -4  -9  287.06   14.06
   1   4   9  303.64   14.76
  -1  -4 -10   68.32    8.27
   1   4  10   64.72    9.20
  -1  -4 -11  373.40   17.05
   1   4  11  363.27   17.09
  -1  -4 -12  155.97   10.60
   1   4  12  145.75   11.39
  -1  -4 -13   52.91    8.17
   1   4  13   45.48    9.11
  -1  -4 -14  215.98   11.81
   1   4  14  185.07   11.35
  -1  -5  18   42.92    8.73
  -1  -5  18   63.23    8.73
   1   5 -18   61.08    7.43
   1   5 -17  261.89   13.12
  -1  -5  16    6.35    9.39
  -1  -5  16   -2.52    8.31
   1   5 -16    5.79    7.85
  -1  -5  15  738.77   30.73
  -1  -5  15  695.34   28.86
   1   5 -15  811.62   32.83
  -1  -5  14  488.94   21.53
  -1  -5  14  522.56   22.74
   1   5 -14  601.01   24.89
  -1  -5  13  415.81   19.24
  -1  -5  13  409.45   18.96
   1   5 -13  432.10   19.05
  -1  -5  12 1319.24   51.84
  -1  -5  12 1251.99   48.99
   1   5 -12 1362.67   52.96
  -1  -5  11 1371.54   53.47
  -1  -5  11 1511.64   58.98
   1   5 -11 1603.17   61.97
  -1  -5  10    2.94    8.22
  -1  -5  10    7.75    7.38
   1   5 -10   17.75    7.29
   1   5 -10   25.59    8.69
  -1  -5   9 2305.52   88.35
  -1  -5   9 2335.41   89.33
   1   5  -9 2312.52   88.87
  -1  -5   8   58.33    8.83
  -1  -5   8   73.27    8.36
   1   5  -8   66.22    9.25
  -1  -5   7 1196.89   46.84
  -1  -5   7 1167.94   45.72
   1   5  -7 1168.87   45.90
  -1  -5   6  845.71   33.95
  -1  -5   6  824.70   32.88
   1   5  -6  904.09   36.00
  -1  -5   5  805.09   32.22
  -1  -5   5  789.21   31.47
   1   5  -5  865.80   34.74
   1   5  -4  300.65   14.90
  -1  -5   3   63.65    8.50
   1   5  -3   62.86    8.83
  -1  -5   2   38.67    8.03
   1   5  -2   42.78    8.45
  -1  -5   1 1292.62   50.20
   1   5  -1 1538.72   59.49
  -1  -5   0   83.82    8.31
   1   5   0  115.16    9.48
  -1  -5  -1  849.92   34.00
   1   5   1  952.65   37.78
  -1  -5  -2  892.88   35.63
   1   5   2  977.87   38.81
  -1  -5  -3   -4.06    7.38
   1   5   3   -3.78    7.80
  -1  -5  -4   13.92    7.47
   1   5   4   25.40    7.47
  -1  -5  -5    1.45    7.29
   1   5   5   15.55    7.24
  -1  -5  -6 1060.06   42.08
   1   5   6 1160.46   45.62
  -1  -5  -7    6.77    8.27
   1   5   7    6.07    7.75
  -1  -5  -8  574.39   24.10
   1   5   8  580.00   24.42
  -1  -5  -9   -4.48    7.66
   1   5   9   10.55    7.85
  -1  -5 -10  207.81   11.86
   1   5  10  244.47   13.26
  -1  -5 -11   25.08    7.38
   1   5  11   25.50    8.41
  -1  -5 -12  152.70   10.55
   1   5  12  136.92   10.83
  -1  -5 -13  155.37   10.41
   1   5  13  161.34   10.65
  -1  -6  17   16.16    8.97
  -1  -6  17   13.22    8.83
   1   6 -17    8.03    6.91
  -1  -6  16  342.58   16.81
  -1  -6  16  331.84   16.48
   1   6 -16  349.68   15.97
  -1  -6  15   36.33    8.36
  -1  -6  15   47.63    9.62
   1   6 -15   51.93    7.80
  -1  -6  14  587.00   25.26
  -1  -6  14  554.78   23.77
  -1  -6  13   20.92    7.94
  -1  -6  13   19.57    9.39
  -1  -6  12   12.89    8.69
  -1  -6  12   21.90    7.61
   1   6 -12   13.17    8.31
  -1  -6  11 2417.60   92.60
  -1  -6  11 2397.51   92.04
   1   6 -11 2323.73   89.43
  -1  -6  10  424.59   18.87
  -1  -6  10  482.40   21.34
   1   6 -10  469.32   21.20
  -1  -6   9    0.70    7.71
  -1  -6   9   24.94    8.59
   1   6  -9   24.38    8.83
  -1  -6   8 2276.56   87.23
  -1  -6   8 2336.81   89.38
   1   6  -8 2284.50   87.79
   1   6  -7  272.21   14.38
  -1  -6   6  370.27   17.09
  -1  -6   6  385.03   17.56
   1   6  -6  404.36   18.54
  -1  -6   5    7.80    7.61
  -1  -6   5  -11.35    8.17
   1   6  -5    9.85    7.80
   1   6  -4  705.62   28.95
  -1  -6   3 1053.99   41.42
   1   6  -3 1277.68   49.92
  -1  -6   2   82.80    8.55
   1   6  -2   96.90    9.71
  -1  -6   1  679.00   27.60
   1   6  -1  814.43   32.92
  -1  -6   0   75.28    8.50
   1   6   0   91.81    9.11
  -1  -6  -1  603.82   24.94
   1   6   1  668.26   27.55
  -1  -6  -2   75.75    9.11
   1   6   2   75.56    8.87
  -1  -6  -3  208.88   12.38
   1   6   3  244.89   12.56
  -1  -6  -4   60.85    8.59
   1   6   4   35.26    8.22
  -1  -6  -5  259.22   14.24
   1   6   5  277.76   13.96
  -1  -6  -6   23.82    8.36
   1   6   6   20.97    8.41
  -1  -6  -7  136.64   10.69
   1   6   7  155.79   11.25
  -1  -6  -8  124.73    9.85
   1   6   8  110.91    9.71
  -1  -6  -9  995.62   39.69
   1   6   9 1046.99   41.70
  -1  -6 -10  159.76   10.51
   1   6  10  188.66   12.09
  -1  -6 -11  334.83   16.06
   1   6  11  399.60   18.31
  -1  -6 -12  238.07   12.80
   1   6  12  259.04   14.01
  -1  -6 -13   71.26    7.61
   1   6  13  100.54    9.20
  -1  -7  17  444.06   19.80
  -1  -7  17  451.53   20.08
  -1  -7  16    9.57    8.97
  -1  -7  16    4.16    8.92
  -1  -7  15   19.19    8.59
  -1  -7  15   32.13    9.25
  -1  -7  14  157.66   11.35
  -1  -7  14  182.41   12.14
  -1  -7  13    3.18    9.25
  -1  -7  13   -1.73    8.31
   1   7 -13    3.83    8.78
  -1  -7  12  151.72   10.65
  -1  -7  12  153.55   11.58
   1   7 -12  117.40   10.97
  -1  -7  11   65.47    9.71
  -1  -7  11   79.90    8.69
   1   7 -11   56.04    9.57
  -1  -7  10  733.17   29.84
  -1  -7  10  756.05   31.19
   1   7 -10  705.62   29.61
  -1  -7   9   88.49    9.48
  -1  -7   9   82.98    8.92
   1   7  -9   87.65   10.27
  -1  -7   8  356.31   16.53
  -1  -7   8  367.57   17.37
   1   7  -8  426.17   19.71
   1   7  -7  563.65   24.24
  -1  -7   6 1885.70   72.48
  -1  -7   6 1817.05   70.05
   1   7  -6 1863.75   71.92
  -1  -7   5  211.83   12.14
   1   7  -5  225.37   12.70
   1   7  -4  799.95   32.32
  -1  -7   3  584.67   24.42
   1   7  -3  594.01   24.89
  -1  -7   2 2011.32   77.33
   1   7  -2 2276.56   87.28
  -1  -7   1  547.31   23.16
   1   7  -1  608.02   25.36
  -1  -7   0    9.81    8.41
   1   7   0   10.23    7.80
  -1  -7  -1  411.00   18.82
   1   7   1  518.36   22.14
  -1  -7  -2   19.24    8.08
   1   7   2   18.87    7.94
  -1  -7  -3  235.83   13.31
   1   7   3  267.86   14.15
  -1  -7  -4   36.33    8.78
   1   7   4   39.93    8.45
  -1  -7  -5  374.94   17.56
   1   7   5  415.67   18.87
  -1  -7  -6  256.47   14.24
   1   7   6  288.60   14.62
  -1  -7  -7   71.08    8.92
   1   7   7   96.95    9.53
  -1  -7  -8  318.91   16.16
   1   7   8  364.90   17.33
  -1  -7  -9  223.69   13.12
   1   7   9  253.53   13.87
  -1  -7 -10   26.34    8.87
   1   7  10   36.89    8.59
  -1  -7 -11  340.62   15.60
   1   7  11  450.64   20.22
  -1  -8  17   26.34    8.36
  -1  -8  17   20.41    8.64
  -1  -8  16  156.95   10.83
  -1  -8  16  191.89   11.81
  -1  -8  15   47.68    8.13
  -1  -8  15   40.77    9.34
  -1  -8  14  119.04   10.55
  -1  -8  14  120.16    9.48
   1   8 -14  122.63   10.65
  -1  -8  13    1.45    8.08
  -1  -8  13   10.27    8.55
   1   8 -13   23.77    9.01
  -1  -8  12  122.54   10.88
  -1  -8  12  116.14    9.90
   1   8 -12  110.44   10.83
  -1  -8  11  246.90   13.26
  -1  -8  11  248.67   14.15
   1   8 -11  243.39   14.24
  -1  -8  10   60.52    8.64
  -1  -8  10   49.50    9.43
   1   8 -10   46.84    9.34
  -1  -8   9  359.72   16.76
  -1  -8   9  383.44   18.12
   1   8  -9  376.49   17.93
  -1  -8   8  600.08   25.08
  -1  -8   8  589.34   25.12
   1   8  -8  571.13   24.61
  -1  -8   7 1433.19   55.76
  -1  -8   7 1446.73   56.41
   1   8  -7 1485.49   58.09
  -1  -8   6  457.18   20.22
  -1  -8   6  445.55   19.61
   1   8  -6  425.15   19.19
  -1  -8   5  408.71   18.40
   1   8  -5  445.83   19.85
  -1  -8   4    5.28    9.20
   1   8  -4   -3.46    8.17
  -1  -8   3  450.97   19.99
   1   8  -3  497.81   21.71
  -1  -8   2  772.86   31.52
   1   8  -2  799.48   32.36
  -1  -8   1 2072.02   79.76
   1   8  -1 2137.40   82.24
  -1  -8   0  333.80   16.44
   1   8   0  357.20   16.90
  -1  -8  -1  988.61   39.46
   1   8   1  999.82   40.02
  -1  -8  -2   20.17    8.22
   1   8   2   31.94    8.41
  -1  -8  -3   59.03    9.11
   1   8   3   74.11    9.06
  -1  -8  -4  204.96   12.42
   1   8   4  198.28   12.00
  -1  -8  -5   12.42    8.55
   1   8   5   25.45    8.55
  -1  -8  -6  413.98   19.01
   1   8   6  434.16   19.75
  -1  -8  -7  172.69   12.05
   1   8   7  211.03   12.84
  -1  -8  -8  282.76   15.04
   1   8   8  298.45   15.22
  -1  -8  -9  334.32   16.34
   1   8   9  356.45   17.09
  -1  -8 -10    5.14    7.85
   1   8  10   -3.69    8.45
  -1  -9  16  223.69   12.14
  -1  -9  16  234.66   13.26
  -1  -9  15   42.22    7.57
  -1  -9  15   48.24    8.92
  -1  -9  14  275.29   14.06
  -1  -9  14  304.80   15.18
   1   9 -14  266.60   14.24
  -1  -9  13   22.70    8.50
  -1  -9  13   11.44    7.99
   1   9 -13   19.61    9.25
  -1  -9  12   97.79    9.85
  -1  -9  12   81.58    9.01
   1   9 -12   86.53   10.51
  -1  -9  11  198.66   11.95
  -1  -9  11  194.59   12.33
   1   9 -11  181.75   12.33
  -1  -9  10  826.10   33.30
  -1  -9  10  780.34   32.04
   1   9 -10  786.87   32.46
  -1  -9   9  114.55    9.71
  -1  -9   9   98.21   10.18
   1   9  -9   94.57   10.27
  -1  -9   8 1659.67   64.49
  -1  -9   8 1681.16   64.96
   1   9  -8 1728.32   67.11
  -1  -9   7  920.43   37.03
  -1  -9   7  935.84   37.13
   1   9  -7  977.87   39.13
  -1  -9   6  230.08   12.42
  -1  -9   6  214.30   12.52
   1   9  -6  210.52   12.66
  -1  -9   5   -7.05    9.06
   1   9  -5    4.76    8.17
  -1  -9   4   15.69    9.20
  -1  -9   3    8.22    8.08
   1   9  -3   -2.90    8.78
  -1  -9   2  316.15   15.50
   1   9  -2  327.97   16.39
  -1  -9   1 1188.95   46.89
   1   9  -1 1136.18   44.78
  -1  -9   0  924.17   36.99
   1   9   0 1037.65   41.24
  -1  -9  -1  144.11   11.02
   1   9   1  141.45   10.41
  -1  -9  -2  677.13   28.25
   1   9   2  799.02   32.50
  -1  -9  -3   62.20    9.43
   1   9   3   61.64    9.06
  -1  -9  -4  172.37   11.81
   1   9   4  183.39   12.28
  -1  -9  -5   69.58    9.76
   1   9   5   81.54    9.99
  -1  -9  -6  168.82   11.81
   1   9   6  169.75   11.44
  -1  -9  -7   75.42    9.48
   1   9   7   88.82    9.90
  -1  -9  -8    8.41    8.22
   1   9   8   13.68    8.55
  -1  -9  -9    6.30    7.43
   1   9   9   -7.57    8.31
  -1 -10  15   35.12    7.33
  -1 -10  15   46.75    8.92
   1  10 -15   47.91    9.20
  -1 -10  14   10.41    7.57
  -1 -10  14   15.60    8.08
   1  10 -14  -15.74    9.15
  -1 -10  13  386.81   17.37
  -1 -10  13  374.99   17.61
   1  10 -13  321.61   16.39
  -1 -10  12   88.49   10.04
  -1 -10  12  110.72    9.25
   1  10 -12   88.73   10.41
  -1 -10  11    6.72    7.89
  -1 -10  11   10.65    9.06
   1  10 -11   14.10    9.39
  -1 -10  10    0.98    8.13
  -1 -10  10   -3.22    8.87
   1  10 -10    8.22    9.29
  -1 -10   9 1052.12   41.70
  -1 -10   9  997.49   39.88
   1  10  -9 1011.50   40.49
  -1 -10   8  342.16   16.67
  -1 -10   8  362.34   16.67
   1  10  -8  353.79   17.47
  -1 -10   7  824.23   33.02
  -1 -10   7  768.19   31.43
   1  10  -7  809.29   33.25
  -1 -10   6  279.68   14.38
  -1 -10   6  291.26   14.24
   1  10  -6  302.61   15.41
  -1 -10   5  148.18   10.83
   1  10  -5  137.53   10.69
  -1 -10   4  199.64   12.70
  -1 -10   3  245.03   13.12
   1  10  -3  260.58   13.92
  -1 -10   2   20.97    8.13
   1  10  -2   28.35    8.13
  -1 -10   1  466.94   20.92
   1  10  -1  493.14   21.67
  -1 -10   0  238.02   13.82
   1  10   0  224.29   12.94
  -1 -10  -1  779.87   32.18
   1  10   1  798.08   32.64
  -1 -10  -2  111.52   10.37
   1  10   2  121.14   10.93
  -1 -10  -3   72.43    9.81
   1  10   3  107.92   10.18
  -1 -10  -4  139.77   11.16
   1  10   4  141.96   10.79
  -1 -10  -5  158.54   11.58
   1  10   5  191.14   12.56
  -1 -10  -6   80.23   10.32
   1  10   6   92.70   10.04
  -1 -10  -7  152.42   11.53
   1  10   7  199.03   11.91
  -1 -11  13    5.56    6.86
  -1 -11  13   23.72    8.69
   1  11 -13   11.58    8.64
  -1 -11  12   19.10    8.55
  -1 -11  12   14.43    7.29
   1  11 -12    7.05    8.73
  -1 -11  11   12.98    8.31
  -1 -11  11   10.55    7.43
   1  11 -11    9.76    8.83
  -1 -11  10  110.35    8.83
  -1 -11  10  126.23    9.85
   1  11 -10  107.78   10.51
  -1 -11   9   11.16    9.06
  -1 -11   9   11.53    7.66
   1  11  -9   -0.70    9.01
  -1 -11   8  555.72   23.91
  -1 -11   8  600.08   24.94
   1  11  -8  618.76   26.34
  -1 -11   7   71.08    8.87
  -1 -11   7  101.94    8.92
   1  11  -7   78.50   10.65
  -1 -11   6  323.48   15.60
  -1 -11   6  354.07   16.11
   1  11  -6  328.90   16.06
  -1 -11   5    9.76    9.01
   1  11  -5    6.21    8.31
  -1 -11   4  816.76   33.02
  -1 -11   3   29.89    9.29
   1  11  -3   21.53    8.45
  -1 -11   2  998.89   39.65
   1  11  -2 1006.36   40.07
  -1 -11   1  285.75   14.90
   1  11  -1  277.95   14.52
  -1 -11   0  598.68   25.50
   1  11   0  618.29   26.01
  -1 -11  -1   90.13   10.09
   1  11   1  124.78   10.65
  -1 -11  -2  340.15   16.53
   1  11   2  365.88   17.23
  -1 -11  -3  193.61   12.28
   1  11   3  248.95   13.64
  -1 -11  -4   19.94    8.87
   1  11   4   23.12    8.59
  -1 -11  -5    5.18    9.20
   1  11   5    3.69    8.69
  -1 -12  11    4.76    8.73
  -1 -12  11   -5.84    6.72
   1  12 -11   -0.23    8.59
  -1 -12  10    9.53    8.87
  -1 -12  10    7.38    6.82
   1  12 -10   21.20    8.55
  -1 -12   9  353.88   15.74
  -1 -12   9  337.35   15.88
   1  12  -9  338.61   16.48
  -1 -12   8   19.47    8.92
  -1 -12   8   19.05    6.58
   1  12  -8   20.92    8.59
  -1 -12   7   87.28    7.99
  -1 -12   7   78.45    8.59
   1  12  -7   98.30   10.27
  -1 -12   6   66.22    8.31
  -1 -12   6   60.85    7.29
   1  12  -6   57.53    8.55
  -1 -12   5  523.03   22.14
   1  12  -5  559.45   23.49
  -1 -12   4   18.54    8.73
   1  12  -4   22.32    8.64
  -1 -12   3  186.84   11.25
   1  12  -3  183.81   11.58
  -1 -12   2   33.06    8.17
   1  12  -2   26.71    8.73
  -1 -12   1  400.82   18.40
   1  12  -1  389.75   17.56
  -1 -12   0  247.32   13.45
   1  12   0  288.93   14.43
  -1 -12  -1   25.50    8.27
   1  12   1   56.79    8.41
  -1 -12  -2  269.13   13.82
   1  12   2  294.95   14.24
  -1 -12  -3    8.17    8.13
  -1 -13   7    2.85    5.98
  -1 -13   7    6.16    7.38
   1  13  -7    1.49    7.38
  -1 -13   6  157.00    8.83
  -1 -13   6  151.16    9.85
   1  13  -6  148.69    9.43
  -1 -13   5   28.58    8.59
   1  13  -5   30.17    7.29
  -1 -13   4   34.28    8.41
   1  13  -4   26.48    7.10
  -1 -13   3   37.13    7.24
   1  13  -3   42.22    7.19
  -1 -13   2   18.77    7.57
  -2  13   2   -4.20    7.43
   2 -13  -2   -9.95    7.24
  -2  13   1   31.05    7.43
   2 -13  -1   29.23    7.89
  -2  13   0   -6.12    7.94
   2 -13   0    0.05    7.75
  -2  13  -1   -5.46    8.22
   2 -13   1    7.57    7.75
  -2  13  -2  128.00   10.32
   2 -13   2  134.49    9.90
  -2  13  -3   88.96    9.43
   2 -13   3   97.55    9.81
  -2  13  -4    4.16    7.99
   2 -13   4   11.07    7.94
  -2  13  -5  566.46   24.10
   2 -13   5  601.95   24.98
  -2  13  -6  302.14   15.18
   2 -13   6  314.52   15.04
   2 -13   6  341.79   15.97
  -2  13  -7  202.53   12.19
   2 -13   7  191.18   12.05
   2 -13   7  194.17   11.07
  -2  13  -8  149.20   11.35
   2 -13   8  167.60   11.11
   2 -13   8  180.82   10.51
  -2  13  -9   97.83   10.41
   2 -13   9   87.70    8.87
   2 -13   9   91.95    9.48
  -2  12   5  157.84    9.53
   2 -12  -5  158.54   10.04
  -2  12   4   53.33    8.13
   2 -12  -4   45.76    7.85
  -2  12   3   54.45    8.45
   2 -12  -3   21.43    7.80
  -2  12   2   17.47    8.55
   2 -12  -2    6.49    7.71
  -2  12   1  283.70   14.34
   2 -12  -1  232.70   12.70
  -2  12   0    2.80    8.08
   2 -12   0   10.09    7.43
  -2  12  -1  192.12   11.91
   2 -12   1  222.99   13.26
  -2  12  -2    1.03    8.55
   2 -12   2    4.53    9.15
  -2  12  -3   71.17    9.11
   2 -12   3   74.20    9.20
  -2  12  -4  189.36   12.47
   2 -12   4  195.71   12.05
  -2  12  -5   56.23    9.62
   2 -12   5   73.36    9.20
  -2  12  -6   43.85    9.43
   2 -12   6   51.32    8.59
  -2  12  -7   76.07   10.60
   2 -12   7   97.65    8.92
   2 -12   7   83.40    9.25
  -2  12  -8   79.25   10.32
   2 -12   8   85.74   10.09
   2 -12   8   90.97    8.69
  -2  12  -9  148.64   11.53
   2 -12   9  171.66   10.55
   2 -12   9  166.57   11.16
  -2  12 -10    5.51    9.11
   2 -12  10    9.85    7.94
   2 -12  10    6.02    8.73
  -2  12 -11    8.64    9.11
   2 -12  11   14.90    8.92
   2 -12  11    7.89    6.96
  -2  12 -12   45.53    9.39
   2 -12  12   53.14    7.85
   2 -12  12   80.28    9.57
  -2  11   7   -7.61    7.10
   2 -11  -7   17.23    7.10
  -2  11   6  320.91   14.99
   2 -11  -6  294.30   14.01
  -2  11   5  119.32   10.13
   2 -11  -5  101.43    9.20
  -2  11   4  827.04   33.25
   2 -11  -4  893.81   35.72
  -2  11   3  551.98   23.86
   2 -11  -3  429.54   19.10
  -2  11   2  598.21   25.64
   2 -11  -2  519.76   22.46
  -2  11   1   -2.66    8.50
   2 -11  -1    3.78    8.36
  -2  11   0  607.55   25.82
   2 -11   0  599.15   25.59
  -2  11  -1    7.71    8.45
   2 -11   1   14.62    9.34
  -2  11  -2  106.75    9.53
   2 -11   2  109.32   10.13
  -2  11  -3   40.95    9.48
   2 -11   3   49.03    9.71
  -2  11  -4  334.74   16.16
   2 -11   4  353.23   16.95
  -2  11  -5   41.14    8.92
   2 -11   5   73.55    9.95
  -2  11  -6    8.31    9.11
   2 -11   6   20.45    9.25
  -2  11  -7   13.17    9.25
   2 -11   7   21.67    9.57
   2 -11   7   19.29    8.69
  -2  11  -8   64.26    9.81
   2 -11   8   69.11    9.90
   2 -11   8   79.76    8.73
  -2  11  -9   -2.90    9.39
   2 -11   9    4.20    8.45
   2 -11   9    6.77    8.03
  -2  11 -10    4.95    9.53
   2 -11  10   -1.12    8.92
   2 -11  10    0.23    7.57
  -2  11 -11  580.93   24.94
   2 -11  11  617.36   26.24
   2 -11  11  664.52   27.46
  -2  11 -12  214.25   13.03
   2 -11  12  247.74   13.82
   2 -11  12  273.93   13.45
  -2  11 -13  355.10   17.42
   2 -11  13  400.63   17.93
   2 -11  13  404.13   18.68
  -2  10   9  345.48   15.64
   2 -10  -9  324.70   14.85
  -2  10   8   95.50    8.64
   2 -10  -8  109.04    9.01
  -2  10   7  833.57   33.39
   2 -10  -7  792.01   31.90
  -2  10   6   59.54    8.41
   2 -10  -6   67.06    8.78
   2 -10  -5  554.31   23.49
  -2  10   4  290.09   14.57
   2 -10  -4  293.13   14.71
  -2  10   3  189.22   11.95
   2 -10  -3  200.76   12.14
  -2  10   2  144.11   10.93
   2 -10  -2  162.47   11.25
  -2  10   1   92.65    9.34
   2 -10  -1  109.28    9.99
  -2  10   0  450.55   20.03
   2 -10   0  454.47   20.64
  -2  10  -1  242.04   13.31
   2 -10   1  239.14   13.73
  -2  10  -2   24.00    8.55
   2 -10   2   29.37    9.11
  -2  10  -3    6.77    9.20
   2 -10   3    6.02    9.06
  -2  10  -4  405.25   18.77
   2 -10   4  397.69   18.63
  -2  10  -5  150.93   10.97
   2 -10   5  167.79   11.35
  -2  10  -6   51.32    8.97
   2 -10   6   85.09   10.13
   2 -10   6   86.07    9.11
  -2  10  -7   89.47   10.18
   2 -10   7   92.79   10.55
   2 -10   7   90.32    9.48
  -2  10  -8   44.64    9.85
   2 -10   8   65.61   10.18
   2 -10   8   54.59    8.69
  -2  10  -9    9.01    9.53
   2 -10   9    8.45    9.48
   2 -10   9   19.75    8.41
  -2  10 -10  288.41   15.41
   2 -10  10  341.51   16.90
   2 -10  10  331.05   16.02
  -2  10 -11   -5.51    9.25
   2 -10  11   -9.20    8.50
   2 -10  11   13.82    7.80
  -2  10 -12  267.96   14.66
   2 -10  12  272.44   14.06
   2 -10  12  276.22   14.38
  -2  10 -13    7.66    9.48
   2 -10  13   -2.05    7.43
   2 -10  13   10.32    8.83
  -2  10 -14   55.71    8.87
   2 -10  14   77.19    8.87
   2 -10  14   84.15    9.81
  -2   9  11   18.54    7.43
   2  -9 -11   35.02    7.29
  -2   9  10    1.82    7.43
   2  -9 -10   11.39    7.43
  -2   9   9   43.20    8.08
   2  -9  -9   31.85    8.08
  -2   9   8  544.51   23.07
   2  -9  -8  488.47   21.20
  -2   9   7  449.20   19.75
   2  -9  -7  473.99   20.55
  -2   9   6   60.90    8.59
   2  -9  -6   67.57    8.73
   2  -9  -5  280.80   14.38
  -2   9   4  424.21   19.01
   2  -9  -4  425.89   19.19
  -2   9   3 1103.49   43.48
   2  -9  -3 1033.44   40.95
  -2   9   2  132.44    9.99
   2  -9  -2  125.34    9.90
  -2   9   1    6.86    8.13
   2  -9  -1    9.25    7.94
  -2   9   0  288.04   14.66
   2  -9   0  311.71   15.74
  -2   9  -1   93.12    9.67
   2  -9   1   90.64    9.01
  -2   9  -2   56.04    8.73
   2  -9   2   47.68    8.27
  -2   9  -3  473.06   20.87
   2  -9   3  446.58   20.22
  -2   9  -4   30.68    8.45
   2  -9   4   27.32    8.92
  -2   9  -5 1175.88   46.51
   2  -9   5 1140.85   45.20
  -2   9  -6  595.88   25.22
   2  -9   6  664.52   27.60
   2  -9   6  589.34   25.26
  -2   9  -7  210.52   12.84
   2  -9   7  185.67   11.91
   2  -9   7  175.73   11.07
  -2   9  -8  158.68   11.91
   2  -9   8  137.71   10.79
   2  -9   8  162.65   10.88
  -2   9  -9  208.28   13.22
   2  -9   9  213.79   12.89
   2  -9   9  198.10   12.42
  -2   9 -10  152.14   11.77
   2  -9  10  180.07   11.30
   2  -9  10  186.42   12.61
  -2   9 -11  532.37   23.30
   2  -9  11  630.43   26.48
   2  -9  11  639.31   26.71
  -2   9 -12   32.36    9.34
   2  -9  12   33.81    8.64
   2  -9  12   30.12    8.31
  -2   9 -13    4.11    9.29
   2  -9  13   -3.69    8.36
   2  -9  13    5.70    8.55
   2  -9  14    2.99    8.92
   2  -9  14   -4.25    8.27
   2  -9  15   72.85    9.67
   2  -9  15   58.93    9.06
  -2   8  12    2.38    6.68
   2  -8 -12   -4.30    7.89
  -2   8  11  418.00   18.54
   2  -8 -11  329.46   15.41
  -2   8  10  175.31   11.16
   2  -8 -10  139.72   10.32
  -2   8   9 1032.04   40.81
   2  -8  -9  971.80   38.71
  -2   8   8  164.01   10.83
   2  -8  -8  152.42   10.32
  -2   8   7   65.10    7.94
   2  -8  -7   62.86    8.64
  -2   8   6  945.65   37.64
   2  -8  -6  887.74   35.54
  -2   8   5  180.82   11.49
   2  -8  -5  168.30   11.11
  -2   8   4  222.75   12.19
   2  -8  -4  223.27   12.42
  -2   8   3  277.11   14.06
   2  -8  -3  289.63   14.48
  -2   8   2 6052.16  229.38
   2  -8  -2 5421.73  205.52
  -2   8   1  440.93   19.71
   2  -8  -1  450.50   19.57
  -2   8   0    5.42    7.99
   2  -8   0   -2.19    7.00
  -2   8  -1   22.70    8.78
   2  -8   1    5.37    7.14
  -2   8  -2  109.60    9.53
   2  -8   2  106.99    8.55
  -2   8  -3  259.32   13.92
   2  -8   3  260.16   13.64
  -2   8  -4 2567.03   98.35
   2  -8   4 2514.73   96.20
  -2   8  -5   -8.41    7.80
   2  -8   5   12.33    7.80
  -2   8  -6  769.13   31.43
   2  -8   6  687.87   28.44
   2  -8   6  738.31   30.07
  -2   8  -7   71.22    9.43
   2  -8   7   88.35    8.78
   2  -8   7   68.83    9.01
  -2   8  -8  849.45   34.65
   2  -8   8  908.29   36.24
   2  -8   8  892.41   35.91
  -2   8  -9   24.14    9.15
   2  -8   9   23.35    8.22
   2  -8   9   28.86    8.73
  -2   8 -10   51.98    9.62
   2  -8  10   48.66    9.20
   2  -8  10   43.94    8.87
  -2   8 -11   82.75   10.09
   2  -8  11   97.60    9.90
   2  -8  11   79.81    8.87
  -2   8 -12   95.97   10.09
   2  -8  12  129.73   10.27
   2  -8  12  108.20   10.18
   2  -8  13  188.71   11.63
   2  -8  13  176.01   11.81
   2  -8  14  216.68   12.56
   2  -8  14  196.79   12.38
   2  -8  15   74.62    9.67
   2  -8  15   78.55    9.67
   2  -8  16   -8.83    8.97
   2  -8  16    1.12    9.48
  -2   7  13   42.31    7.89
   2  -7 -13   36.00    7.66
  -2   7  12  116.56    9.48
   2  -7 -12  113.15    9.25
  -2   7  11  214.39   12.19
   2  -7 -11  202.86   11.81
  -2   7  10  891.95   35.86
   2  -7 -10  868.13   34.65
  -2   7   9  647.24   26.85
   2  -7  -9  617.36   25.59
  -2   7   8  847.58   34.00
   2  -7  -8  849.92   34.14
  -2   7   7  650.05   26.62
   2  -7  -7  650.05   26.85
  -2   7   6  133.37    9.85
   2  -7  -6  123.42    9.85
  -2   7   5 1189.42   46.61
  -2   7   4  957.32   37.87
   2  -7  -4  862.99   34.37
  -2   7   3  134.96    9.62
   2  -7  -3  117.12    8.92
  -2   7   2    5.93    7.57
   2  -7  -2   10.46    7.19
  -2   7   1 1767.55   68.32
   2  -7  -1 1643.33   63.37
  -2   7   0   10.83    7.43
   2  -7   0    9.90    7.43
  -2   7  -1  617.36   25.59
   2  -7   1  596.34   24.66
  -2   7  -2  516.49   22.37
   2  -7   2  430.24   19.05
  -2   7  -3 2286.84   87.70
   2  -7   3 2032.33   78.03
  -2   7  -4  -20.22    8.22
   2  -7   4   -5.14    7.19
  -2   7  -5 1280.95   49.97
   2  -7   5 1104.89   43.24
  -2   7  -6  164.99   11.11
   2  -7   6  151.68   10.23
   2  -7   6  145.75    9.81
  -2   7  -7  479.60   21.06
   2  -7   7  488.00   21.06
   2  -7   7  491.74   21.01
  -2   7  -8   -5.79    8.45
   2  -7   8   -8.55    7.85
   2  -7   8    5.46    8.08
  -2   7  -9   86.72    9.90
   2  -7   9   92.60    9.48
   2  -7   9   90.74    9.11
  -2   7 -10  181.75   12.09
   2  -7  10  218.18   12.66
   2  -7  10  202.44   12.19
  -2   7 -11  175.17   11.91
   2  -7  11  183.11   11.95
   2  -7  11  168.40   10.93
   2  -7  12   12.56    9.25
   2  -7  12   10.09    8.36
   2  -7  13   57.95    9.25
   2  -7  13   58.89    9.57
   2  -7  14  133.51   10.23
   2  -7  14  114.18   10.55
   2  -7  15  441.91   20.08
   2  -7  15  425.05   19.38
   2  -7  16   34.93    8.64
   2  -7  16   33.44    9.53
  -2   6  14  139.26    9.90
   2  -6 -14  130.71    9.48
  -2   6  13   51.18    8.31
   2  -6 -13   53.84    8.31
  -2   6  12  121.51    9.81
   2  -6 -12  127.72    9.67
  -2   6  11 1110.96   43.90
   2  -6 -11 1029.24   40.81
  -2   6  10   90.78    8.97
   2  -6 -10   95.64    8.83
  -2   6   9    6.40    7.57
   2  -6  -9    7.19    7.89
  -2   6   8  568.79   23.91
   2  -6  -8  597.28   24.98
  -2   6   7   -4.72    7.33
   2  -6  -7   -5.00    7.80
  -2   6   6 1411.70   54.78
   2  -6  -6 1396.29   54.22
  -2   6   5 1240.79   48.43
  -2   6   4 2128.53   81.68
   2  -6  -4 1912.31   73.36
  -2   6   3   56.74    8.17
   2  -6  -3   49.50    7.75
  -2   6   2 2939.69  112.03
   2  -6  -2 2565.16   97.97
  -2   6   1  817.23   32.74
   2  -6  -1  778.94   31.24
  -2   6   0  554.78   23.40
   2  -6   0  516.96   21.62
  -2   6  -1  601.01   24.98
   2  -6   1  558.52   23.16
  -2   6  -2  590.27   24.66
   2  -6   2  465.12   19.89
  -2   6  -3  353.32   16.34
   2  -6   3  285.61   14.10
  -2   6  -4 1781.56   68.51
   2  -6   4 1653.14   63.70
  -2   6  -5    1.91    7.57
   2  -6   5    4.90    7.47
   2  -6   5    5.14    7.38
  -2   6  -6  892.41   35.68
   2  -6   6  916.23   36.24
   2  -6   6  834.51   33.30
  -2   6  -7   83.87    8.92
   2  -6   7   93.49    8.50
   2  -6   7   91.02    8.64
  -2   6  -8  545.91   23.44
   2  -6   8  552.45   23.35
   2  -6   8  537.04   22.56
  -2   6  -9 1004.96   40.07
   2  -6   9 1012.43   40.11
   2  -6   9 1039.51   40.95
  -2   6 -10   48.43    8.97
   2  -6  10   61.60    8.78
   2  -6  10   52.82    8.27
   2  -6  11  216.87   12.61
   2  -6  11  190.20   11.86
   2  -6  12  494.54   21.67
   2  -6  12  452.46   20.41
   2  -6  13  502.95   22.00
   2  -6  13  550.11   23.96
   2  -6  14   35.54    8.59
   2  -6  14   41.84    9.34
   2  -6  15  181.70   11.91
   2  -6  15  175.45   12.42
   2  -6  16  589.34   24.84
   2  -6  16  568.32   24.28
  -2   5  15  204.12   12.24
   2  -5 -15  188.57   10.83
  -2   5  14   73.55    9.29
   2  -5 -14   77.29    8.97
  -2   5  13   49.92    9.25
   2  -5 -13   51.93    8.64
  -2   5  12   21.06    8.87
   2  -5 -12   15.46    7.99
  -2   5  11  148.27   10.88
   2  -5 -11  133.98   10.46
  -2   5  10   78.22    9.20
   2  -5 -10   69.53    8.36
  -2   5   9  152.56   10.51
   2  -5  -9  148.18   10.09
  -2   5   8  447.93   19.57
   2  -5  -8  490.34   21.11
  -2   5   7 1811.45   69.77
   2  -5  -7 1757.27   67.67
  -2   5   6    0.14    7.00
   2  -5  -6    1.49    7.05
  -2   5   5 2487.64   95.08
  -2   5   4  347.30   16.11
   2  -5  -4  321.89   14.94
  -2   5   3 2097.24   80.37
   2  -5  -3 1927.73   73.88
  -2   5   2   14.15    7.71
   2  -5  -2    2.05    7.05
  -2   5   1 4547.06  172.37
   2  -5  -1 4318.70  163.77
  -2   5   0  857.86   34.14
   2  -5   0  772.40   30.77
  -2   5  -1 1790.90   68.88
   2  -5   1 1570.01   60.38
  -2   5  -2   14.90    7.52
   2  -5   2   12.80    6.63
  -2   5  -3  317.65   14.85
   2  -5   3  260.67   12.94
  -2   5  -4  176.24   10.65
   2  -5   4  159.10    9.76
  -2   5  -5 1192.22   46.51
   2  -5   5 1100.22   42.92
   2  -5   5 1160.93   45.20
  -2   5  -6   15.46    7.61
   2  -5   6   17.79    7.05
   2  -5   6   22.56    7.19
  -2   5  -7  470.72   20.36
   2  -5   7  483.80   20.50
   2  -5   7  481.00   20.27
  -2   5  -8 1502.30   58.23
   2  -5   8 1441.12   55.76
   2  -5   8 1518.18   58.61
  -2   5  -9  538.90   22.93
   2  -5   9  518.36   21.95
   2  -5   9  444.15   19.47
   2  -5  10    3.83    7.61
   2  -5  10    2.94    7.38
  -2   5 -11  704.22   28.35
   2  -5  11  636.50   26.81
   2  -5  11  696.28   28.77
  -2   5 -12  697.21   28.39
   2  -5  12  679.93   28.11
   2  -5  12  695.34   28.86
  -2   5 -13   54.08    8.08
   2  -5  13   45.20    9.34
   2  -5  13   42.17    9.90
  -2   5 -14  388.30   17.98
   2  -5  14  351.36   17.61
   2  -5  14  346.46   16.67
  -2   5 -15  256.47   12.94
   2  -5  15  202.44   12.61
   2  -5  15  219.90   13.22
  -2   5 -16  106.01    9.43
   2  -5  16   67.57    9.48
   2  -5  16   91.67   10.13
  -2   5 -17   -1.91    7.89
   2  -5  17   -1.40    9.15
   2  -5  17   -7.05    9.06
  -2   4  16   58.47    8.73
   2  -4 -16   56.93    7.71
  -2   4  15  193.57   12.09
   2  -4 -15  209.21   11.67
  -2   4  14    5.28    8.78
   2  -4 -14   14.15    8.87
  -2   4  13   95.83    9.76
   2  -4 -13  114.18    9.57
  -2   4  12   50.15    8.97
   2  -4 -12   54.31    8.31
  -2   4  11  363.78   17.14
   2  -4 -11  337.59   15.83
  -2   4  10  953.59   38.06
   2  -4 -10  920.43   36.75
  -2   4   9   26.57    8.17
   2  -4  -9   27.23    7.89
  -2   4   8  611.29   25.26
   2  -4  -8  555.72   23.07
  -2   4   7   18.49    7.52
   2  -4  -7   23.44    7.14
  -2   4   6  125.62    9.67
   2  -4  -6  112.03    8.45
  -2   4   5   79.39    8.08
   2  -4  -5   82.33    8.03
  -2   4   4 4425.18  167.88
   2  -4  -4 3893.28  147.66
  -2   4   3 1638.19   63.04
   2  -4  -3 1486.42   57.30
  -2   4   2 2779.98  105.82
   2  -4  -2 2592.25   98.77
  -2   4   1  106.99    8.87
   2  -4  -1  101.10    8.36
  -2   4   0 3117.61  118.47
   2  -4   0 2858.90  108.71
  -2   4  -1  994.22   38.95
   2  -4   1  868.13   34.14
  -2   4  -2 1870.75   71.64
   2  -4   2 1737.66   66.55
  -2   4  -3   -3.22    6.82
   2  -4   3   -9.39    6.82
  -2   4  -4  853.65   33.67
   2  -4   4  787.81   31.24
   2  -4   4  762.59   30.12
  -2   4  -5 1768.48   67.90
   2  -4   5 1747.00   66.97
   2  -4   5 1741.40   66.69
  -2   4  -6 2607.66   99.37
   2  -4   6 2694.52  102.60
   2  -4   6 2598.32   98.95
  -2   4  -7  191.14   10.65
   2  -4   7  196.09   10.88
   2  -4   7  186.47   10.27
  -2   4  -8 1340.72   51.74
   2  -4   8 1040.92   40.77
   2  -4   8 1178.68   45.81
  -2   4  -9  432.48   18.31
   2  -4   9  360.05   16.48
   2  -4   9  383.77   17.00
  -2   4 -10  244.19   12.00
   2  -4  10  208.09   11.95
   2  -4  10  220.93   11.86
  -2   4 -11  724.30   29.09
   2  -4  11  707.95   29.19
   2  -4  11  687.41   28.25
  -2   4 -12    9.20    6.86
   2  -4  12   20.45    7.80
   2  -4  12   11.11    9.01
  -2   4 -13  909.23   36.19
   2  -4  13  841.04   34.37
   2  -4  13  839.18   34.04
  -2   4 -14  142.43   10.18
   2  -4  14  133.56   10.37
   2  -4  14  136.69   11.16
  -2   4 -15  130.90    9.39
   2  -4  15  131.32   10.27
   2  -4  15  110.72   10.93
  -2   4 -16  171.80   10.60
   2  -4  16  154.01   10.65
   2  -4  16  135.01   10.97
  -2   4 -17    5.84    8.13
   2  -4  17    1.49    8.45
   2  -4  17   -2.62    8.87
  -2   3  16  117.35   10.37
   2  -3 -16  106.99    8.78
  -2   3  15   69.30    9.48
   2  -3 -15   83.92    9.53
  -2   3  14  102.60    9.90
   2  -3 -14  119.04    9.53
  -2   3  13  109.32   10.27
   2  -3 -13  114.13    9.15
  -2   3  12  419.73   19.19
   2  -3 -12  388.39   17.70
  -2   3  11 1039.05   41.28
   2  -3 -11  977.87   38.76
  -2   3  10   99.94    9.39
   2  -3 -10   96.43    8.69
  -2   3   9  953.59   37.78
   2  -3  -9  904.56   35.86
  -2   3   8  510.42   21.62
   2  -3  -8  498.74   21.11
  -2   3   7 1161.40   45.39
   2  -3  -7 1101.16   43.06
   2  -3  -6  313.26   14.52
  -2   3   5  771.00   30.73
   2  -3  -5  748.11   29.89
  -2   3   4   61.41    7.94
   2  -3  -4   60.99    7.38
  -2   3   3 3435.63  130.48
   2  -3  -3 3133.95  119.08
  -2   3   2  930.71   36.71
   2  -3  -2  868.13   34.32
  -2   3   1 2617.93   99.70
   2  -3  -1 2504.46   95.50
  -2   3   0 3124.61  118.75
   2  -3   0 3296.47  125.25
  -2   3  -1  676.20   27.13
   2  -3   1  634.17   25.45
  -2   3  -2   77.75    7.57
   2  -3   2   57.11    6.40
  -2   3  -3  985.81   38.34
   2  -3   3  972.74   37.73
   2  -3   3 1020.84   39.46
  -2   3  -5 5379.70  203.61
   2  -3   5 5407.72  204.77
   2  -3   5 4823.98  182.69
  -2   3  -6  242.46   11.72
   2  -3   6  214.58   10.93
   2  -3   6  199.31   10.32
  -2   3  -7 1926.32   73.64
   2  -3   7 1696.57   65.19
   2  -3   7 1705.44   65.38
  -2   3  -8 1434.59   55.24
   2  -3   8 1272.54   49.36
   2  -3   8 1294.96   50.11
  -2   3  -9  835.44   32.92
   2  -3   9  776.13   31.24
   2  -3   9  757.45   30.26
  -2   3 -10  145.33    8.92
   2  -3  10  134.54    9.62
   2  -3  10  131.08    9.34
  -2   3 -11   75.37    7.80
   2  -3  11   75.28    8.97
   2  -3  11   58.00    8.08
  -2   3 -12  605.68   25.03
   2  -3  12  520.69   22.37
   2  -3  12  539.37   23.44
  -2   3 -13   10.41    7.57
   2  -3  13    9.25    7.94
   2  -3  13    3.27    9.34
  -2   3 -14  735.04   29.84
   2  -3  14  629.03   26.10
   2  -3  14  611.29   26.01
  -2   3 -15   29.00    7.38
   2  -3  15   15.32    9.01
   2  -3  15   31.99    9.06
  -2   3 -16    2.99    7.19
   2  -3  16    1.17    8.59
   2  -3  16   -8.31    8.78
  -2   3 -17    4.72    7.80
   2  -3  17    4.90    8.64
   2  -3  17   10.55    8.17
  -2   2  17  157.61   11.02
  -2   2  17  152.61   10.18
   2  -2 -17  182.73   10.55
  -2   2  16  144.30   10.79
   2  -2 -16  134.82    9.95
  -2   2  15   -1.03    8.73
   2  -2 -15    5.09    7.57
  -2   2  14   37.45    9.25
   2  -2 -14   43.24    7.80
  -2   2  13  318.67   15.83
   2  -2 -13  336.70   15.88
  -2   2  12 1435.99   55.99
   2  -2 -12 1428.52   55.62
  -2   2  11   12.14    8.27
   2  -2 -11   23.21    7.43
  -2   2  10 1629.32   62.86
   2  -2 -10 1603.17   61.92
  -2   2   9   71.82    8.45
   2  -2  -9   90.83    8.22
  -2   2   8  536.10   22.60
   2  -2  -8  545.44   22.93
  -2   2   7   18.59    6.91
   2  -2  -7   15.22    7.29
   2  -2  -6   40.63    7.66
  -2   2   5  669.19   26.99
   2  -2  -5  663.12   26.71
  -2   2   4  923.23   36.33
   2  -2  -4  885.41   35.02
  -2   2   3  773.80   30.96
   2  -2  -3  719.63   28.86
  -2   2   2 1717.11   66.13
   2  -2  -2 1538.26   59.31
  -2   2   1 3001.80  114.09
   2  -2  -1 2783.71  105.91
  -2   2   0  190.58    9.95
   2  -2   0  177.08    9.15
  -2   2  -1 2428.34   92.32
   2  -2   1 2277.03   86.53
  -2   2  -6 2087.90   79.57
   2  -2   6 1948.27   74.39
   2  -2   6 1967.89   75.19
  -2   2  -7  168.96    9.15
   2  -2   7  149.95    8.92
   2  -2   7  148.74    9.48
  -2   2  -8 1829.19   70.00
   2  -2   8 1670.42   64.07
   2  -2   8 1700.77   65.42
  -2   2  -9  284.40   13.22
   2  -2   9  242.93   12.00
   2  -2   9  274.08   13.40
  -2   2 -10  434.63   18.63
  -2   2 -11  504.35   21.01
   2  -2  11  434.86   19.15
   2  -2  11  458.26   20.36
  -2   2 -12   71.36    7.89
   2  -2  12   53.84    8.31
   2  -2  12   57.30    9.06
  -2   2 -13   39.04    7.89
   2  -2  13   39.04    9.39
   2  -2  13   55.20    8.69
  -2   2 -14   10.04    7.75
   2  -2  14    6.21    7.85
   2  -2  14   12.52    8.69
  -2   2 -15  229.62   12.14
   2  -2  15  181.89   12.05
   2  -2  15  186.84   12.09
  -2   2 -16   16.76    8.17
   2  -2  16    7.99    8.36
   2  -2  16   24.05    8.97
  -2   1  17  404.74   18.73
  -2   1  17  427.01   19.01
   2  -1 -17  462.22   19.94
  -2   1  16   67.01    9.39
  -2   1  16   60.33    9.11
   2  -1 -16   87.61    8.97
  -2   1  15  344.73   16.39
  -2   1  15  362.43   17.75
   2  -1 -15  395.77   18.17
  -2   1  14  157.94   11.35
   2  -1 -14  175.45   10.83
  -2   1  13   20.83    8.64
   2  -1 -13   12.19    7.38
  -2   1  12   38.62    8.08
   2  -1 -12   53.19    7.80
  -2   1  11 1435.52   55.90
   2  -1 -11 1492.96   57.77
  -2   1  10  324.60   15.13
   2  -1 -10  361.73   16.20
  -2   1   9    1.82    7.29
   2  -1  -9    9.39    6.96
  -2   1   8   18.40    7.05
   2  -1  -8   26.10    7.00
  -2   1   7   71.03    7.71
   2  -1  -7   63.88    8.08
   2  -1  -6 1080.61   42.17
  -2   1   5 1224.91   47.45
   2  -1  -5 1241.25   48.15
  -2   1   4    9.81    7.47
   2  -1  -4   11.58    7.89
  -2   1   2  966.66   37.87
   2  -1  -2  918.56   36.10
   2  -1  -1 2153.75   81.91
  -2   1   0 1115.63   42.68
   2  -1   0  989.55   37.87
  -2   1  -1  540.30   21.62
  -2   1  -2  127.21    6.12
   2  -1   2  107.08    5.74
   2  -1   2  104.51    5.46
  -2   1  -3 1540.13   58.70
   2  -1   3 1793.23   68.41
   2  -1   3 1772.69   67.57
   2  -1   4 3223.15  122.16
   2  -1   4 3238.56  122.77
  -2   1  -5 2162.62   82.28
   2  -1   5 2189.71   83.40
   2  -1   5 2304.58   87.65
  -2   1  -6  864.86   33.76
   2  -1   6  822.37   32.22
   2  -1   6  813.96   32.04
  -2   1  -7   28.95    5.88
   2  -1   7   23.77    6.40
   2  -1   7   15.27    6.07
  -2   1  -8  330.53   14.71
   2  -1   8  307.79   14.06
   2  -1   8  311.57   14.20
  -2   1  -9  193.33   10.18
   2  -1   9  185.81   10.51
   2  -1   9  174.05   10.23
  -2   1 -10  648.65   26.38
   2  -1  10  584.67   24.14
   2  -1  10  579.06   24.05
  -2   1 -11  119.78    8.73
   2  -1  11  116.89    9.25
   2  -1  11  115.16    9.53
  -2   1 -12 2003.38   76.91
   2  -1  12 1864.21   72.01
   2  -1  12 1744.20   67.43
  -2   1 -13  271.74   13.68
   2  -1  13  199.96   12.19
   2  -1  13  193.15   11.67
  -2   1 -14  444.39   19.61
   2  -1  14  405.35   18.45
   2  -1  14  378.21   17.79
  -2   1 -15  191.23   11.44
   2  -1  15  151.54   10.83
   2  -1  15  148.92   11.11
  -2   1 -16  795.28   31.99
   2  -1  16  648.18   26.81
   2  -1  16  650.05   27.13
  -2   0  18  684.14   28.25
  -2   0  18  643.98   26.57
   2   0 -18  748.11   29.93
  -2   0  17   35.54    9.15
  -2   0  17   34.23    8.45
   2   0 -17   53.00    7.75
  -2   0  16  360.61   17.00
  -2   0  16  347.16   16.86
   2   0 -16  404.78   18.26
  -2   0  15   85.04    9.34
  -2   0  15   79.57    9.57
   2   0 -15  104.00    9.39
  -2   0  14  553.38   24.05
  -2   0  14  528.63   22.93
   2   0 -14  625.76   26.06
  -2   0  13  176.24   11.16
  -2   0  13  186.94   11.72
   2   0 -13  192.26   11.39
  -2   0  12  681.34   28.30
  -2   0  12  676.67   27.88
   2   0 -12  700.01   28.44
  -2   0  11   21.48    7.89
   2   0 -11   27.04    7.24
  -2   0  10  535.63   22.46
   2   0 -10  517.42   21.53
  -2   0   9  285.19   14.34
   2   0  -9  288.18   13.64
  -2   0   8  177.97   10.74
   2   0  -8  190.02   10.79
  -2   0   7 1797.90   69.02
   2   0  -7 1772.22   67.95
  -2   0   6   62.48    8.45
   2   0  -6   66.45    7.85
  -2   0   5  295.28   14.10
   2   0  -5  287.29   13.50
  -2   0   4 1116.57   43.90
   2   0  -4 1013.83   39.79
  -2   0   1  405.53   16.86
  -2   0   1  374.43   15.46
   2   0  -1  385.78   16.16
   2   0  -1  355.61   14.85
  -2   0   0  231.77    9.90
  -2   0   0  224.34    9.62
   2   0   0  232.56   10.13
  -2   0  -1  303.68   12.24
   2   0   1  334.04   13.54
  -2   0  -2  417.86   16.72
   2   0   2  463.07   18.54
  -2   0  -3  601.48   23.68
   2   0   3  613.15   24.14
  -2   0  -4  105.54    7.24
   2   0   4   95.92    6.63
  -2   0  -5 2253.22   85.83
   2   0   5 2255.08   85.88
  -2   0  -6  502.95   20.69
   2   0   6  497.34   20.31
  -2   0  -7  827.50   32.69
   2   0   7  824.23   32.60
  -2   0  -8   48.47    6.30
   2   0   8   43.10    7.47
  -2   0  -9  513.22   21.25
   2   0   9  510.88   21.53
  -2   0 -10  400.26   17.19
   2   0  10  400.21   17.89
  -2   0 -11 1020.84   40.11
   2   0  11 1073.60   42.40
  -2   0 -12  104.79    8.92
   2   0  12  124.31    9.57
   2   0  12  106.15    9.99
  -2   0 -13 1679.75   64.86
   2   0  13 1510.24   58.65
   2   0  13 1604.10   62.44
  -2   0 -14  756.99   30.73
   2   0  14  722.90   29.79
   2   0  14  652.85   27.09
  -2   0 -15 1509.30   58.28
   2   0  15 1405.17   54.82
   2   0  15 1505.10   58.51
  -2   0 -16   -1.54    7.61
   2   0  16   -4.39    8.13
   2   0  16   -7.80    8.59
  -2  -1  18   19.05    8.22
  -2  -1  18   19.19    8.55
   2   1 -18   31.76    7.38
  -2  -1  17  896.62   35.86
  -2  -1  17  788.74   32.41
   2   1 -17  976.47   38.48
  -2  -1  16   79.29    9.95
  -2  -1  16   70.98    9.34
   2   1 -16   80.23    8.97
  -2  -1  15  780.80   31.90
  -2  -1  15  708.42   29.61
   2   1 -15  877.00   35.02
  -2  -1  14  196.46   12.33
  -2  -1  14  191.37   12.09
   2   1 -14  234.66   12.52
  -2  -1  13  315.03   15.69
  -2  -1  13  291.54   14.94
   2   1 -13  329.13   15.50
  -2  -1  12   70.38    9.15
  -2  -1  12   66.55    8.55
   2   1 -12   84.10    8.45
  -2  -1  11  609.89   25.45
  -2  -1  11  617.36   25.54
   2   1 -11  661.72   26.99
  -2  -1  10  229.71   12.66
  -2  -1  10  200.62   11.77
   2   1 -10  230.13   12.09
  -2  -1   9 1044.18   41.24
  -2  -1   9  982.08   38.95
   2   1  -9 1046.52   41.00
  -2  -1   8  444.15   18.96
  -2  -1   8  407.77   18.31
   2   1  -8  517.89   21.57
  -2  -1   7  528.63   22.23
  -2  -1   7  480.06   20.64
   2   1  -7  590.27   24.14
  -2  -1   6  522.56   21.95
  -2  -1   6  484.73   20.69
   2   1  -6  693.48   28.11
  -2  -1   5  103.25    8.69
  -2  -1   5   81.49    8.59
   2   1  -5  106.24    8.41
  -2  -1   4 3548.17  134.77
  -2  -1   4 3513.15  133.70
   2   1  -4 3777.00  143.32
   2   1  -4 3555.64  135.24
  -2  -1   3  558.05   23.86
  -2  -1   3  556.65   23.21
   2   1  -1 3778.40  143.37
  -2  -1   0  100.68    7.80
   2   1   0  124.64    8.69
  -2  -1  -1  162.37    8.92
   2   1   1  181.56    9.57
  -2  -1  -2  205.05    9.90
   2   1   2  228.36   10.74
  -2  -1  -3   96.62    7.00
   2   1   3   99.66    7.19
  -2  -1  -4  544.51   22.04
   2   1   4  530.50   21.48
  -2  -1  -5   89.24    7.57
   2   1   5   81.54    6.77
  -2  -1  -6 1129.64   43.90
   2   1   6 1205.30   46.79
  -2  -1  -7 1373.88   53.10
   2   1   7 1336.52   51.65
  -2  -1  -8  955.92   37.50
   2   1   8  957.79   37.73
  -2  -1  -9  162.37    9.81
   2   1   9  173.49   10.46
  -2  -1 -10  580.47   23.96
   2   1  10  563.65   23.72
  -2  -1 -11  245.22   12.75
   2   1  11  212.01   12.24
  -2  -1 -12  373.68   17.09
   2   1  12  371.86   17.47
  -2  -1 -13  730.37   29.70
   2   1  13  732.24   30.21
  -2  -1 -14 1133.85   44.36
   2   1  14 1111.90   43.90
  -2  -1 -15   78.03    8.31
   2   1  15   58.19    8.87
   2   1  15   74.90    9.48
  -2  -2  18  956.39   37.92
  -2  -2  18  911.56   36.43
   2   2 -18 1060.06   41.47
   2   2 -17  355.80   16.25
  -2  -2  16  603.82   25.92
  -2  -2  16  550.11   23.82
   2   2 -16  618.76   25.73
  -2  -2  15  106.24   10.04
  -2  -2  15   93.58   10.27
   2   2 -15  106.29    9.29
  -2  -2  14  247.74   13.82
  -2  -2  14  262.82   14.01
   2   2 -14  294.58   14.24
  -2  -2  13   35.72    7.99
  -2  -2  13   35.72    8.92
   2   2 -13   43.66    7.61
  -2  -2  12  583.73   24.61
  -2  -2  12  605.22   25.26
   2   2 -12  651.45   26.71
  -2  -2  11   99.19    9.01
  -2  -2  11  111.00    9.48
   2   2 -11  125.71    9.15
   2   2 -10 1232.38   47.87
  -2  -2   9 2150.01   82.47
  -2  -2   9 2038.87   78.31
   2   2  -9 2291.51   87.51
  -2  -2   8  377.42   17.05
  -2  -2   8  395.40   17.84
   2   2  -8  415.81   17.84
  -2  -2   7  430.10   18.59
  -2  -2   7  487.54   20.87
   2   2  -7  493.61   20.59
  -2  -2   6   47.68    8.08
  -2  -2   6   44.60    7.24
  -2  -2   5  835.91   33.25
  -2  -2   5  804.15   32.22
   2   2  -5  792.48   31.43
   2   2  -5  874.67   34.88
  -2  -2   4 1011.03   39.93
  -2  -2   4 1063.33   41.56
   2   2  -4 1175.41   46.19
   2   2  -4 1057.26   41.28
  -2  -2   3 1481.29   57.16
  -2  -2   3 1547.13   59.96
   2   2  -3 1584.49   61.36
   2   2  -2  421.50   18.82
  -2  -2   1 1749.80   67.29
   2   2  -1 1875.42   72.10
  -2  -2   0  216.68   11.35
   2   2   0  262.31   13.17
  -2  -2  -1   33.76    6.63
   2   2   1   36.28    6.72
  -2  -2  -2  456.20   18.77
   2   2   2  543.57   22.18
  -2  -2  -3  108.95    8.31
   2   2   3  113.15    8.13
  -2  -2  -4   13.31    6.86
   2   2   4   23.40    6.40
  -2  -2  -5 6010.13  227.47
   2   2   5 5641.21  213.51
  -2  -2  -6  211.83   11.25
   2   2   6  239.80   12.05
  -2  -2  -7 3469.72  131.83
   2   2   7 3517.35  133.70
  -2  -2  -8  662.66   26.95
   2   2   8  714.49   29.00
  -2  -2  -9   65.14    7.99
   2   2   9   70.61    8.41
  -2  -2 -10   10.13    6.96
   2   2  10   23.16    8.27
  -2  -2 -11  554.31   23.26
   2   2  11  529.56   22.88
  -2  -2 -12   50.43    7.99
   2   2  12   61.41    9.39
  -2  -2 -13  410.02   18.26
   2   2  13  415.06   19.01
  -2  -2 -14 1019.43   40.11
   2   2  14  982.54   39.09
  -2  -2 -15  420.15   18.45
   2   2  15  380.97   17.79
  -2  -3  18   12.00    9.20
  -2  -3  18   24.66    8.13
   2   3 -18   14.29    6.96
  -2  -3  17  168.07   11.91
  -2  -3  17  155.65   11.07
   2   3 -17  172.51   10.60
  -2  -3  16    5.51    8.45
  -2  -3  16    2.10    8.31
   2   3 -16   10.79    8.03
  -2  -3  15  511.35   22.46
  -2  -3  15  529.56   22.88
   2   3 -15  587.94   24.52
  -2  -3  14  373.59   17.98
  -2  -3  14  397.97   18.45
   2   3 -14  447.65   19.52
  -2  -3  13   31.33    8.78
  -2  -3  13   23.86    8.45
   2   3 -13   31.38    7.29
  -2  -3  12  333.15   16.34
  -2  -3  12  324.70   15.55
   2   3 -12  333.94   15.50
  -2  -3  11 1749.80   67.62
  -2  -3  11 1743.27   67.29
   2   3 -11 1830.59   70.42
  -2  -3  10 1070.80   42.12
  -2  -3  10 1011.96   40.02
   2   3 -10 1058.19   41.47
  -2  -3   9  700.95   28.72
  -2  -3   9  679.93   27.65
   2   3  -9  820.03   32.60
  -2  -3   8  846.18   33.72
  -2  -3   8  858.32   34.32
   2   3  -8  948.92   37.31
   2   3  -8  905.49   36.19
  -2  -3   7  869.06   34.70
  -2  -3   7  914.83   36.19
   2   3  -7  969.00   38.48
   2   3  -7  984.41   38.53
  -2  -3   6 1079.21   42.26
  -2  -3   6 1086.21   42.59
  -2  -3   5 1035.31   40.49
  -2  -3   5  993.28   39.18
   2   3  -5 1157.66   45.44
   2   3  -5 1114.23   43.24
  -2  -3   4  287.76   13.87
  -2  -3   4  308.87   14.71
   2   3  -4  314.47   15.41
  -2  -3   3  873.73   34.88
  -2  -3   3  929.31   36.61
   2   3  -3  947.99   37.55
  -2  -3   2  230.69   12.24
   2   3  -2  239.84   12.52
  -2  -3   1 1909.51   73.18
   2   3  -1 2257.89   86.30
  -2  -3   0 1263.20   48.99
   2   3   0 1492.49   57.58
  -2  -3  -1  602.88   24.66
   2   3   1  693.94   28.16
  -2  -3  -2 1494.83   57.63
   2   3   2 1693.30   65.05
  -2  -3  -3 1245.46   48.24
   2   3   3 1368.27   52.91
  -2  -3  -4   47.35    7.66
   2   3   4   51.37    7.61
  -2  -3  -5  186.80   10.69
   2   3   5  204.91   11.35
  -2  -3  -6 1413.10   54.68
   2   3   6 1467.28   56.69
  -2  -3  -7 1368.27   53.10
   2   3   7 1377.61   53.38
  -2  -3  -8 1800.24   69.25
   2   3   8 1902.97   73.22
  -2  -3  -9  218.41   11.58
   2   3   9  215.00   12.09
  -2  -3 -10  170.45   10.55
   2   3  10  167.42   10.65
  -2  -3 -11   -6.07    7.38
   2   3  11    9.06    7.61
  -2  -3 -12  183.15   11.16
   2   3  12  173.72   11.35
  -2  -3 -13  244.14   12.66
   2   3  13  240.83   13.22
  -2  -3 -14    9.90    7.47
   2   3  14    8.59    8.22
  -2  -4  18   32.74    8.31
  -2  -4  18   43.76    8.27
   2   4 -18   20.13    7.24
  -2  -4  17   72.15    9.25
  -2  -4  17   61.18    9.25
   2   4 -17   75.56    8.27
  -2  -4  16  486.13   21.62
  -2  -4  16  490.80   21.71
   2   4 -16  543.57   22.98
  -2  -4  15  104.14    9.62
  -2  -4  15  110.49   10.55
   2   4 -15  108.06    9.34
  -2  -4  14  552.91   24.00
  -2  -4  14  537.50   23.07
   2   4 -14  605.22   25.08
  -2  -4  13  273.05   14.43
  -2  -4  13  290.89   15.13
   2   4 -13  290.84   14.20
  -2  -4  12 1090.88   43.34
  -2  -4  12 1068.93   42.22
   2   4 -12 1189.42   46.51
  -2  -4  11  513.69   22.14
  -2  -4  11  479.13   20.73
   2   4 -11  530.50   22.32
  -2  -4  10  840.11   33.67
  -2  -4  10  792.48   31.94
   2   4 -10  901.29   35.77
  -2  -4   9 2720.20  103.86
  -2  -4   9 2616.07   99.98
   2   4  -9 2801.46  107.13
   2   4  -9 2685.18  102.32
  -2  -4   8  700.01   28.49
  -2  -4   8  680.87   28.02
   2   4  -8  705.62   29.09
   2   4  -8  707.49   28.53
  -2  -4   7 1145.52   44.69
  -2  -4   7 1177.28   46.19
   2   4  -7 1183.35   46.42
   2   4  -7 1090.88   42.59
  -2  -4   6  889.61   35.26
  -2  -4   6  879.80   34.79
   2   4  -6 1074.07   42.64
  -2  -4   5  211.97   11.95
  -2  -4   5  210.42   11.72
   2   4  -5  226.72   12.56
  -2  -4   4 1686.76   65.00
  -2  -4   4 1817.05   69.72
   2   4  -4 1768.95   68.23
  -2  -4   3   75.33    8.64
   2   4  -3   97.23    9.48
  -2  -4   2  291.54   14.29
   2   4  -2  328.34   15.74
  -2  -4   1  682.27   27.74
   2   4  -1  834.97   33.48
  -2  -4   0  138.88   10.09
   2   4   0  166.29   10.55
  -2  -4  -1 1710.11   65.85
   2   4   1 2128.06   81.58
  -2  -4  -2  264.03   13.12
   2   4   2  311.81   15.04
  -2  -4  -3   36.28    8.08
   2   4   3   46.42    7.85
  -2  -4  -4   67.76    8.45
   2   4   4   79.15    8.73
  -2  -4  -5 1116.57   43.80
   2   4   5 1183.35   46.14
  -2  -4  -6    3.69    6.91
   2   4   6    0.19    7.43
  -2  -4  -7   22.42    7.80
   2   4   7   16.20    7.71
  -2  -4  -8  591.21   24.75
   2   4   8  629.03   26.15
  -2  -4  -9   -0.19    7.00
   2   4   9    2.33    8.13
  -2  -4 -10   -2.15    7.66
   2   4  10   -5.79    7.71
  -2  -4 -11  337.54   16.20
   2   4  11  352.95   16.95
  -2  -4 -12  440.09   19.43
   2   4  12  414.73   18.96
  -2  -4 -13   90.27    9.29
   2   4  13   94.00    9.95
  -2  -4 -14  265.72   13.54
   2   4  14  269.36   14.01
  -2  -5  18   97.83    9.62
  -2  -5  18  106.52    9.71
   2   5 -18  106.33    8.69
  -2  -5  17  553.38   23.49
  -2  -5  17  626.23   26.38
   2   5 -17  619.23   25.40
  -2  -5  16  102.08    9.62
  -2  -5  16  100.92    9.85
   2   5 -16  111.56    9.48
  -2  -5  15 1464.47   57.21
  -2  -5  15 1452.33   56.60
   2   5 -15 1602.70   62.06
  -2  -5  14  225.04   12.70
  -2  -5  14  222.10   13.26
   2   5 -14  265.44   13.31
  -2  -5  13   11.95    9.06
  -2  -5  13    1.59    8.45
   2   5 -13   -4.20    7.33
  -2  -5  12 1477.55   57.77
  -2  -5  12 1407.03   54.87
   2   5 -12 1565.34   60.47
  -2  -5  11  546.38   23.02
  -2  -5  11  594.94   25.45
   2   5 -11  579.53   24.14
   2   5 -11  538.90   23.54
  -2  -5  10  770.53   31.19
  -2  -5  10  796.21   32.36
   2   5 -10  735.97   30.59
   2   5 -10  811.62   32.41
  -2  -5   9  254.98   13.31
  -2  -5   9  304.52   14.48
   2   5  -9  287.90   14.76
  -2  -5   8 2772.04  105.77
  -2  -5   8 2699.19  102.97
   2   5  -8 2803.33  107.13
  -2  -5   7  537.97   22.70
   2   5  -7  607.08   25.40
  -2  -5   6  164.99   10.41
  -2  -5   6  175.17   10.88
   2   5  -6  178.34   11.44
  -2  -5   5  215.47   12.14
  -2  -5   5  238.82   12.05
   2   5  -5  209.82   12.24
  -2  -5   4   55.38    7.19
  -2  -5   4   58.61    8.50
   2   5  -4   79.20    8.87
  -2  -5   3   65.38    8.17
   2   5  -3   81.21    8.59
  -2  -5   2 2744.49  104.70
   2   5  -2 3322.62  126.51
  -2  -5   1  232.05   12.38
   2   5  -1  263.89   13.59
  -2  -5   0 1409.84   54.73
   2   5   0 1655.94   64.07
  -2  -5  -1  939.11   37.27
   2   5   1 1115.63   44.04
  -2  -5  -2  104.28    9.01
   2   5   2  119.22    9.76
  -2  -5  -3    1.35    8.13
   2   5   3    3.27    7.33
  -2  -5  -4   46.47    7.89
   2   5   4   43.85    7.85
  -2  -5  -5  462.97   20.22
   2   5   5  483.80   21.01
  -2  -5  -6    0.28    8.03
   2   5   6   15.46    8.03
  -2  -5  -7   37.92    8.36
   2   5   7   51.93    8.73
  -2  -5  -8  382.32   17.79
   2   5   8  420.57   18.96
  -2  -5  -9   74.58    8.83
   2   5   9   65.80    8.87
  -2  -5 -10   16.30    7.94
   2   5  10    4.30    8.22
  -2  -5 -11    1.91    8.03
   2   5  11    6.49    8.64
  -2  -5 -12   38.39    7.85
   2   5  12   30.77    8.69
  -2  -5 -13  263.19   13.40
   2   5  13  269.08   14.15
  -2  -6  18  344.54   16.62
  -2  -6  18  345.38   16.25
   2   6 -18  346.13   15.60
  -2  -6  17  467.45   20.55
  -2  -6  17  474.93   20.73
   2   6 -17  511.82   21.39
  -2  -6  16 1024.57   40.81
  -2  -6  16 1009.63   40.25
   2   6 -16 1125.44   44.13
  -2  -6  15   20.64    8.03
  -2  -6  15   15.46    9.15
   2   6 -15   15.41    7.24
  -2  -6  14  310.22   15.60
  -2  -6  14  315.73   16.02
  -2  -6  13   80.42    9.99
  -2  -6  13   81.63    9.48
  -2  -6  12    7.85    7.85
  -2  -6  12   -5.18    9.29
   2   6 -12    2.43    8.83
  -2  -6  11  326.38   16.25
  -2  -6  11  333.66   15.97
   2   6 -11  313.44   15.97
  -2  -6  10   42.03    8.36
  -2  -6  10   37.73    9.06
   2   6 -10   25.54    9.01
  -2  -6   9   94.42    8.73
  -2  -6   9  101.94    9.90
   2   6  -9  111.14   10.09
  -2  -6   8  403.29   17.89
  -2  -6   8  366.77   17.00
   2   6  -8  389.00   18.12
   2   6  -7  272.02   14.24
  -2  -6   6  148.83   10.79
  -2  -6   6  162.23   10.13
   2   6  -6  175.82   11.58
  -2  -6   5  286.08   14.43
  -2  -6   5  274.45   13.54
   2   6  -5  319.00   15.92
  -2  -6   4    2.71    8.08
   2   6  -4    8.08    9.01
  -2  -6   3 1355.20   52.77
   2   6  -3 1572.81   60.99
  -2  -6   2  102.83    9.06
   2   6  -2  101.66    9.62
  -2  -6   1 1208.10   47.40
   2   6  -1 1371.54   53.47
  -2  -6   0   46.00    8.08
   2   6   0   67.39    9.34
  -2  -6  -1  773.33   31.38
   2   6   1  896.15   35.96
  -2  -6  -2    6.30    8.55
   2   6   2   12.24    7.47
  -2  -6  -3  352.02   16.67
   2   6   3  357.20   17.05
  -2  -6  -4  225.18   12.56
   2   6   4  249.51   13.36
  -2  -6  -5  423.28   19.29
   2   6   5  451.53   20.31
  -2  -6  -6  186.14   11.67
   2   6   6  201.08   11.95
  -2  -6  -7   86.16    9.67
   2   6   7   86.35    9.43
  -2  -6  -8    0.19    8.64
   2   6   8   22.84    8.41
  -2  -6  -9  402.17   18.73
   2   6   9  429.44   19.47
  -2  -6 -10  193.05   11.49
   2   6  10  206.74   12.14
  -2  -6 -11  251.99   13.08
   2   6  11  268.24   14.29
  -2  -6 -12   10.37    7.47
   2   6  12   18.77    8.69
  -2  -7  17  398.29   18.26
  -2  -7  17  419.31   18.73
  -2  -7  16   59.49    8.45
  -2  -7  16   66.08    9.43
  -2  -7  15  250.91   14.15
  -2  -7  15  231.16   12.61
  -2  -7  14   15.74    8.59
  -2  -7  14    5.51    9.34
  -2  -7  13   11.25    9.20
  -2  -7  13    2.66    7.99
   2   7 -13   -8.41    9.20
  -2  -7  12   33.34    9.20
  -2  -7  12    6.54    8.13
   2   7 -12   14.80    9.39
  -2  -7  11   93.54   10.04
  -2  -7  11  104.93    9.29
   2   7 -11   85.97    9.99
  -2  -7  10 1102.09   43.66
  -2  -7  10 1115.17   43.85
   2   7 -10 1039.98   41.47
  -2  -7   9   11.63    7.99
  -2  -7   9   -0.19    8.50
   2   7  -9   -0.42    8.73
  -2  -7   8  455.55   19.89
  -2  -7   8  477.26   20.92
   2   7  -8  497.34   22.04
   2   7  -7    0.47    8.78
  -2  -7   6 1554.14   60.10
  -2  -7   6 1508.37   58.56
   2   7  -6 1494.36   58.23
  -2  -7   5   56.41    7.66
  -2  -7   5   52.91    8.87
   2   7  -5   44.69    7.80
  -2  -7   4 1854.88   71.59
   2   7  -4 1902.04   73.27
  -2  -7   3   10.88    8.08
   2   7  -3    5.14    7.57
  -2  -7   2 2129.46   81.86
   2   7  -2 2418.06   92.65
  -2  -7   1   -4.20    7.94
   2   7  -1   10.93    7.85
  -2  -7   0 1605.97   62.44
   2   7   0 1742.80   67.43
  -2  -7  -1  253.39   13.64
   2   7   1  275.20   14.01
  -2  -7  -2  217.48   13.36
   2   7   2  244.56   13.40
  -2  -7  -3   -8.45    8.45
   2   7   3   19.94    8.87
  -2  -7  -4  850.85   34.37
   2   7   4  888.68   35.86
  -2  -7  -5  200.34   12.09
   2   7   5  168.72   11.44
  -2  -7  -6  139.44   10.60
   2   7   6  154.71   11.11
  -2  -7  -7   31.01    9.15
   2   7   7   44.18    9.76
  -2  -7  -8   99.05    9.71
   2   7   8  108.29   10.32
  -2  -7  -9  273.70   14.15
   2   7   9  301.91   15.08
  -2  -7 -10   29.05    8.08
   2   7  10   12.05    8.83
  -2  -7 -11   74.72    8.69
   2   7  11   94.75    9.29
  -2  -8  17   47.73    9.25
  -2  -8  17   24.56    7.38
  -2  -8  16   42.73    8.31
  -2  -8  16   46.75    8.92
  -2  -8  15  141.03   11.02
  -2  -8  15  124.69    9.90
  -2  -8  14   32.92    8.31
  -2  -8  14   22.18    9.15
   2   8 -14   25.82    9.29
  -2  -8  13  601.48   25.12
  -2  -8  13  598.68   25.40
   2   8 -13  531.90   23.40
  -2  -8  12   49.73    8.27
  -2  -8  12   40.58    9.57
   2   8 -12   37.64    9.29
  -2  -8  11  608.95   25.22
  -2  -8  11  672.46   28.35
   2   8 -11  633.24   27.04
  -2  -8  10    3.74    7.80
  -2  -8  10   14.06    8.87
   2   8 -10   -1.07    9.15
  -2  -8   9 1241.25   48.89
  -2  -8   9 1280.48   49.92
   2   8  -9 1294.02   50.95
  -2  -8   8   10.69    7.24
  -2  -8   8   -1.17    8.55
   2   8  -8    0.84    8.50
  -2  -8   7 1734.86   67.43
   2   8  -7 1697.97   66.03
  -2  -8   6   74.72    9.29
  -2  -8   6   61.18    8.22
   2   8  -6   53.84    9.06
  -2  -8   5  970.40   38.85
   2   8  -5 1075.94   42.68
  -2  -8   4  164.75   11.86
   2   8  -4  171.38   11.44
  -2  -8   3  166.43   11.39
   2   8  -3  172.93   11.86
  -2  -8   2  183.71   11.81
   2   8  -2  211.69   12.42
  -2  -8   1   21.11    8.69
   2   8  -1   23.12    8.59
  -2  -8   0   18.03    8.41
   2   8   0   22.46    8.83
  -2  -8  -1  542.17   23.35
   2   8   1  599.15   25.36
  -2  -8  -2  684.14   28.72
   2   8   2  744.38   30.59
  -2  -8  -3    5.93    9.34
   2   8   3   -8.50    9.48
  -2  -8  -4   83.08    9.62
   2   8   4  108.15    9.95
  -2  -8  -5  205.52   12.56
   2   8   5  215.37   12.98
  -2  -8  -6  320.91   16.39
   2   8   6  345.34   16.90
  -2  -8  -7    8.22    8.55
   2   8   7   -1.26    9.29
  -2  -8  -8  271.88   14.15
   2   8   8  269.55   14.57
  -2  -8  -9   24.14    8.08
   2   8   9   23.12    8.73
  -2  -9  16  138.28    9.53
  -2  -9  16  145.05   10.83
  -2  -9  15   75.56    9.48
  -2  -9  15   48.38    7.29
   2   9 -15   59.49    9.01
  -2  -9  14  129.54   10.51
  -2  -9  14  124.92    9.29
   2   9 -14   93.54    9.99
  -2  -9  13    0.56    7.71
  -2  -9  13    5.79    8.50
   2   9 -13    4.81    9.15
  -2  -9  12  299.85   14.80
  -2  -9  12  304.06   15.55
   2   9 -12  289.30   15.78
  -2  -9  11   64.40    8.64
  -2  -9  11   77.43    9.67
   2   9 -11   70.89   10.18
  -2  -9  10  840.58   34.18
  -2  -9  10  910.63   36.33
   2   9 -10  888.21   36.05
  -2  -9   9  121.18   10.41
  -2  -9   9  128.23    9.81
   2   9  -9  124.87   11.11
  -2  -9   8  479.60   20.64
  -2  -9   8  487.07   21.48
   2   9  -8  495.01   21.95
  -2  -9   7  253.34   13.68
  -2  -9   7  259.22   14.20
  -2  -9   6  959.19   38.29
  -2  -9   6  998.42   39.55
   2   9  -6  990.48   39.46
  -2  -9   5  611.75   26.10
   2   9  -5  626.70   26.15
  -2  -9   4   37.92    9.53
   2   9  -4   15.27    7.85
  -2  -9   3  117.03   10.18
   2   9  -3  121.18    9.85
  -2  -9   2  326.56   16.58
   2   9  -2  360.33   17.28
  -2  -9   1  180.07   11.81
   2   9  -1  179.46   12.14
  -2  -9   0  179.18   12.42
   2   9   0  212.95   12.84
  -2  -9  -1   50.11    9.29
   2   9   1   47.21    8.97
  -2  -9  -2  587.00   25.08
   2   9   2  646.78   27.23
  -2  -9  -3  106.47   11.21
   2   9   3  129.78   10.41
  -2  -9  -4  260.49   14.24
   2   9   4  295.32   15.78
  -2  -9  -5  594.48   25.40
   2   9   5  701.42   29.37
  -2  -9  -6   67.11    9.81
   2   9   6   85.27   10.09
  -2  -9  -7  276.92   14.34
   2   9   7  306.39   15.41
  -2  -9  -8  136.08   10.09
   2   9   8  141.68   10.55
  -2 -10  15  368.59   16.44
  -2 -10  15  371.63   17.33
   2  10 -15  354.63   16.58
  -2 -10  14   46.28    7.47
  -2 -10  14   33.86    8.59
   2  10 -14   25.12    8.78
  -2 -10  13  101.24    8.36
  -2 -10  13   81.68    9.43
   2  10 -13   82.61    9.81
  -2 -10  12    3.50    7.43
  -2 -10  12   -0.09    8.73
   2  10 -12   -3.04    8.87
  -2 -10  11    0.23    7.43
  -2 -10  11    6.68    8.83
   2  10 -11    0.00    9.29
  -2 -10  10  161.86   10.41
  -2 -10  10  167.84   11.35
   2  10 -10  166.57   12.05
  -2 -10   9  168.07   10.65
  -2 -10   9  177.46   11.49
   2  10  -9  190.90   12.52
  -2 -10   8  577.66   24.14
  -2 -10   8  536.57   22.98
   2  10  -8  550.11   23.77
  -2 -10   7  312.23   14.99
  -2 -10   7  281.64   14.57
  -2 -10   6  253.76   13.22
  -2 -10   6  215.56   12.28
   2  10  -6  220.89   13.08
  -2 -10   5  147.38   10.65
   2  10  -5  165.45   11.86
  -2 -10   4  133.75   11.02
   2  10  -4  142.57   10.83
  -2 -10   3  323.62   16.34
   2  10  -3  328.67   16.34
  -2 -10   2  339.13   17.19
   2  10  -2  359.53   17.37
  -2 -10   1  453.59   20.73
   2  10  -1  463.58   20.73
  -2 -10   0  116.61   10.93
   2  10   0  134.49   10.88
  -2 -10  -1  621.56   26.34
   2  10   1  631.37   26.62
  -2 -10  -2  155.60   11.86
   2  10   2  187.73   11.77
  -2 -10  -3   93.82   10.37
   2  10   3   95.36   10.46
  -2 -10  -4  168.54   11.58
   2  10   4  226.44   13.64
  -2 -10  -5   39.09    8.78
   2  10   5   14.90    8.36
  -2 -10  -6  651.91   26.95
   2  10   6  756.52   30.87
  -2 -11  13   41.47    6.82
  -2 -11  13   44.64    8.97
   2  11 -13   33.67    8.55
  -2 -11  12  173.58   10.93
  -2 -11  12  163.82    9.71
   2  11 -12  153.36   11.02
  -2 -11  11   34.51    8.36
  -2 -11  11   41.00    6.77
   2  11 -11   30.68    8.64
  -2 -11  10   22.28    7.80
  -2 -11  10   34.09    7.19
   2  11 -10   27.23    9.01
  -2 -11   9  183.67   11.67
  -2 -11   9  170.45   10.23
   2  11  -9  188.80   12.24
  -2 -11   8    4.67    7.29
  -2 -11   8    0.23    8.87
   2  11  -8   29.42    8.78
  -2 -11   7    0.56    7.29
  -2 -11   7   -1.96    7.99
  -2 -11   6   19.05    9.20
  -2 -11   6    5.00    7.00
   2  11  -6   17.05    8.59
  -2 -11   5   61.41    9.76
   2  11  -5   55.24    8.73
  -2 -11   4   29.70    8.69
   2  11  -4   41.24    9.53
  -2 -11   3  382.70   18.07
   2  11  -3  380.97   17.93
  -2 -11   2  372.66   18.26
   2  11  -2  389.93   18.21
  -2 -11   1  245.08   13.54
   2  11  -1  274.31   14.94
  -2 -11   0  287.62   15.08
   2  11   0  300.69   15.08
  -2 -11  -1  122.21    9.99
   2  11   1  150.37   11.72
  -2 -11  -2   88.07    9.81
   2  11   2  102.46   10.09
  -2 -11  -3  168.02   11.77
   2  11   3  181.00   11.67
  -2 -11  -4   33.25    8.78
   2  11   4   29.79    9.25
  -2 -12  10  120.86    7.94
  -2 -12  10  120.30    9.85
   2  12 -10  127.58    9.85
  -2 -12   9   34.84    7.61
  -2 -12   9   32.97    6.40
   2  12  -9   29.70    8.03
  -2 -12   8  145.75    8.64
  -2 -12   8  154.57   10.83
   2  12  -8  147.38   10.41
  -2 -12   7  -13.03    8.45
  -2 -12   7    8.17    6.63
   2  12  -7   26.66    8.41
  -2 -12   6  295.28   13.68
  -2 -12   6  279.63   13.59
   2  12  -6  319.00   15.46
  -2 -12   5   92.93    9.53
   2  12  -5  106.38    9.29
  -2 -12   4   73.55    9.39
   2  12  -4   73.04    8.69
  -2 -12   3   33.62    8.27
   2  12  -3   32.83    8.83
  -2 -12   2   96.20   10.09
   2  12  -2   94.14    8.97
  -2 -12   1    8.17    8.31
   2  12  -1   -8.73    8.03
  -2 -12   0  742.98   30.40
   2  12   0  774.73   31.19
  -2 -12  -1   55.06    9.01
   2  12   1   53.47    8.08
  -3  13   3  100.50    8.78
   3 -13  -3   81.86    8.50
  -3  13   2  131.13    9.81
   3 -13  -2  122.30    9.48
  -3  13   1  164.10   11.30
   3 -13  -1  153.50   10.46
  -3  13   0   50.39    8.73
   3 -13   0   52.02    8.22
  -3  13  -1    6.96    8.41
   3 -13   1    7.24    7.80
  -3  13  -2  329.88   16.39
   3 -13   2  328.34   15.92
  -3  13  -3  132.39   10.41
   3 -13   3  145.56   10.93
  -3  13  -4   82.47    9.67
   3 -13   4   74.58    9.34
  -3  13  -5   18.40    8.27
   3 -13   5   13.87    8.22
  -3  13  -6   13.73    8.36
   3 -13   6   27.51    8.41
   3 -13   6   29.61    7.05
  -3  13  -7  179.93   12.09
   3 -13   7  210.56   11.67
   3 -13   7  204.82   12.52
  -3  13  -8  147.24   11.44
   3 -13   8  170.26   11.07
   3 -13   8  162.79   10.65
  -3  13  -9    1.54    9.20
   3 -13   9   17.70    7.10
   3 -13   9   12.61    8.41
  -3  12   5  744.85   30.03
   3 -12  -5  811.62   32.32
  -3  12   4   62.16    8.69
   3 -12  -4   90.08    8.69
  -3  12   3  190.53   12.00
   3 -12  -3  154.11   10.37
  -3  12   2    9.85    8.17
   3 -12  -2   14.66    8.13
  -3  12   1  326.33   15.74
   3 -12  -1  335.76   15.92
  -3  12   0  922.77   37.03
   3 -12   0  898.02   36.05
  -3  12  -1  202.25   12.38
   3 -12   1  218.64   12.89
  -3  12  -2   75.84    8.87
   3 -12   2   74.02    9.06
  -3  12  -3  159.06   11.39
   3 -12   3  152.14   10.79
  -3  12  -4  172.55   12.00
   3 -12   4  175.96   11.53
  -3  12  -5   15.88    9.01
   3 -12   5    4.81    8.45
  -3  12  -6    7.85    8.41
   3 -12   6    8.78    7.61
   3 -12   6   17.89    8.41
  -3  12  -7   28.53    9.57
   3 -12   7   40.81    8.83
   3 -12   7   56.41    9.85
  -3  12  -8   41.98    9.43
   3 -12   8   33.11    9.25
   3 -12   8   36.89    7.89
  -3  12  -9   34.60    9.48
   3 -12   9   27.79    9.48
   3 -12   9   25.64    8.13
  -3  12 -10  106.01   10.41
   3 -12  10  122.16   10.18
   3 -12  10  122.82    9.15
  -3  12 -11   36.10    9.48
   3 -12  11   45.20    8.78
   3 -12  11   39.83    8.31
  -3  11   8   -1.03    7.24
   3 -11  -8   -0.56    6.77
  -3  11   7   -0.56    7.52
   3 -11  -7   -2.94    7.29
  -3  11   6   86.72    8.59
   3 -11  -6   70.56    8.22
  -3  11   5  523.96   22.23
   3 -11  -5  547.78   23.02
  -3  11   4  433.13   19.38
   3 -11  -4  476.33   20.69
  -3  11   3  480.06   21.20
   3 -11  -3  524.43   22.70
  -3  11   2  308.68   15.55
   3 -11  -2  292.29   14.94
  -3  11   1  144.95   10.93
   3 -11  -1  145.05   10.74
  -3  11   0   57.91    9.67
   3 -11   0   69.44    8.41
  -3  11  -1  473.99   21.06
   3 -11   1  497.34   22.14
  -3  11  -2   11.49    8.36
   3 -11   2   15.13    8.27
  -3  11  -3  508.55   22.46
   3 -11   3  523.03   22.93
  -3  11  -4   26.90    8.31
   3 -11   4   20.59    8.73
  -3  11  -5  151.86   11.49
   3 -11   5  155.09   11.35
  -3  11  -6   47.87    8.87
   3 -11   6   55.57    8.59
   3 -11   6   51.00    9.53
  -3  11  -7  138.37   11.07
   3 -11   7  151.30   11.11
   3 -11   7  164.71   11.07
  -3  11  -8   81.54   10.32
   3 -11   8   84.48    9.43
   3 -11   8   76.45    9.11
  -3  11  -9   13.64    9.25
   3 -11   9   -0.19    8.83
   3 -11   9    3.46    7.85
  -3  11 -10   -8.13    9.20
   3 -11  10   -1.45    8.22
   3 -11  10    4.67    7.43
  -3  11 -11  271.23   14.99
   3 -11  11  271.04   14.48
   3 -11  11  290.37   14.29
  -3  11 -12  261.93   14.29
   3 -11  12  357.43   16.53
   3 -11  12  352.62   16.81
  -3  11 -13   90.97   10.18
   3 -11  13  114.79    9.25
   3 -11  13  115.35   10.27
  -3  10   9   74.53    7.66
   3 -10  -9   68.60    7.57
   3 -10  -8   23.68    7.38
  -3  10   7   61.18    8.27
   3 -10  -7   58.56    8.45
  -3  10   6  319.19   15.36
   3 -10  -6  308.91   14.90
  -3  10   5  418.28   18.96
   3 -10  -5  412.63   18.68
  -3  10   4  618.76   25.96
   3 -10  -4  633.70   26.43
  -3  10   3  225.56   12.94
   3 -10  -3  231.25   13.08
  -3  10   2  539.84   23.30
   3 -10  -2  559.92   23.96
  -3  10   1   42.03    9.29
   3 -10  -1   57.77    9.01
  -3  10   0 1463.07   57.16
   3 -10   0 1434.12   56.13
  -3  10  -1   20.92    8.59
   3 -10   1   31.62    9.06
  -3  10  -2  217.62   13.08
   3 -10   2  244.05   13.82
  -3  10  -3   -0.75    8.78
   3 -10   3   -8.69    8.17
  -3  10  -4 1315.50   51.79
   3 -10   4 1317.84   51.70
  -3  10  -5   35.26    9.39
   3 -10   5   23.40    8.87
  -3  10  -6   -3.60    8.22
   3 -10   6   -4.02    8.08
   3 -10   6    2.90    8.27
  -3  10  -7   10.27    9.53
   3 -10   7   10.51    8.03
   3 -10   7    7.85    8.78
  -3  10  -8  414.31   19.38
   3 -10   8  412.86   18.87
   3 -10   8  394.88   18.35
  -3  10  -9   80.88    9.85
   3 -10   9   88.49    9.15
   3 -10   9   94.66    9.48
  -3  10 -10  343.84   16.90
   3 -10  10  367.61   17.37
   3 -10  10  410.62   18.63
  -3  10 -11    5.37    9.43
   3 -10  11   22.51    9.11
   3 -10  11   11.86    8.31
  -3  10 -12  263.38   14.66
   3 -10  12  326.66   16.44
   3 -10  12  295.14   14.66
  -3  10 -13   14.80    8.97
   3 -10  13    9.34    8.92
   3 -10  13    3.78    7.89
   3 -10  14   52.26    9.34
   3 -10  14   64.44    9.48
  -3   9  11  135.85    8.87
   3  -9 -11  131.60    8.64
  -3   9  10   -3.88    6.54
   3  -9 -10   -9.29    7.05
  -3   9   9   25.68    7.66
   3  -9  -9   26.10    7.57
   3  -9  -8   73.55    8.87
  -3   9   7  823.77   33.11
   3  -9  -7  825.63   33.25
  -3   9   6   33.06    8.17
   3  -9  -6   29.37    8.31
  -3   9   5  407.77   18.59
   3  -9  -5  382.04   17.79
  -3   9   4  296.40   14.80
   3  -9  -4  307.18   15.36
  -3   9   3 2734.68  104.56
   3  -9  -3 2724.41  104.14
  -3   9   2  252.87   13.82
   3  -9  -2  238.12   12.94
  -3   9   1  203.75   12.38
   3  -9  -1  198.10   11.86
  -3   9   0  266.28   13.92
   3  -9   0  283.13   14.71
  -3   9  -1  798.08   32.64
   3  -9   1  778.94   31.66
  -3   9  -2   -2.43    8.45
   3  -9   2    6.44    8.64
  -3   9  -3  874.20   35.12
   3  -9   3  900.35   36.24
  -3   9  -4 1028.31   40.95
   3  -9   4 1053.06   41.84
  -3   9  -5 1070.34   42.59
   3  -9   5 1071.74   42.36
  -3   9  -6   -5.28    8.45
   3  -9   6  -10.55    8.78
   3  -9   6   -0.23    8.36
  -3   9  -7  523.49   23.07
   3  -9   7  542.64   23.35
   3  -9   7  490.34   21.48
  -3   9  -8  162.47   11.81
   3  -9   8  161.11   11.39
   3  -9   8  184.65   11.77
  -3   9  -9  155.55   11.49
   3  -9   9  155.51   10.65
   3  -9   9  178.44   12.19
  -3   9 -10  184.37   12.24
   3  -9  10  234.47   13.12
   3  -9  10  223.41   12.52
  -3   9 -11  181.14   12.00
   3  -9  11  245.78   13.12
   3  -9  11  246.43   13.45
  -3   9 -12   -2.90    9.62
   3  -9  12   -6.16    8.27
   3  -9  12    0.00    8.50
   3  -9  13   58.37    9.48
   3  -9  13   40.30    8.31
   3  -9  14    1.31    8.59
   3  -9  14   19.19    9.11
  -3   8  12   26.95    7.24
   3  -8 -12   30.87    6.91
  -3   8  11   16.02    7.61
   3  -8 -11   24.47    7.29
  -3   8  10  299.67   14.48
   3  -8 -10  292.29   14.38
  -3   8   9    5.18    7.52
   3  -8  -9   16.53    7.66
  -3   8   8  126.32    9.76
   3  -8  -8  127.95    9.48
  -3   8   7    4.58    7.89
   3  -8  -7   -1.21    7.85
  -3   8   6  151.35   10.27
   3  -8  -6  152.28   10.55
  -3   8   5  184.41   11.21
   3  -8  -5  169.42   10.83
  -3   8   4 2377.43   91.11
   3  -8  -4 2473.63   94.71
  -3   8   3  354.35   16.67
   3  -8  -3  339.69   16.06
  -3   8   2 2840.22  108.53
   3  -8  -2 2710.40  103.53
  -3   8   1  481.93   21.01
   3  -8  -1  469.32   20.22
  -3   8   0  190.48   12.28
   3  -8   0  148.41    9.85
  -3   8  -1  229.29   12.98
   3  -8   1  255.12   13.36
  -3   8  -2  584.20   24.66
   3  -8   2  550.58   23.21
  -3   8  -3  104.37    9.67
   3  -8   3  108.57    9.15
  -3   8  -4 1995.91   76.77
   3  -8   4 1873.55   72.15
  -3   8  -5 1027.84   40.77
   3  -8   5 1035.31   41.05
  -3   8  -6  528.63   23.02
   3  -8   6  471.66   20.17
   3  -8   6  483.80   20.83
  -3   8  -7   21.25    8.69
   3  -8   7   12.28    7.99
   3  -8   7   13.26    7.80
  -3   8  -8  241.11   13.45
   3  -8   8  249.60   13.68
   3  -8   8  241.39   12.70
  -3   8  -9   55.29    9.34
   3  -8   9   85.23    9.25
   3  -8   9   72.85    8.55
  -3   8 -10   83.87    9.39
   3  -8  10   75.37    9.25
   3  -8  10   53.84    8.45
  -3   8 -11    8.17    8.73
   3  -8  11  -13.59    8.83
   3  -8  11    4.20    8.27
   3  -8  12   84.15    9.71
   3  -8  12   93.72    9.39
   3  -8  13  187.78   12.24
   3  -8  13  209.58   12.42
   3  -8  14   11.21    8.73
   3  -8  14  -10.88    8.36
   3  -8  15    1.26    8.64
   3  -8  15    2.38    9.43
  -3   7  13  124.55    9.20
   3  -7 -13  117.87    8.73
  -3   7  12  328.53   15.41
   3  -7 -12  319.00   14.99
  -3   7  11  364.11   16.90
   3  -7 -11  334.04   15.64
  -3   7  10  185.44   11.02
   3  -7 -10  169.47   10.65
  -3   7   9  434.25   18.87
   3  -7  -9  447.05   19.29
  -3   7   8  241.39   12.94
  -3   7   7  191.14   10.97
   3  -7  -7  177.69   10.93
  -3   7   6  118.80    9.39
   3  -7  -6  115.91    9.53
  -3   7   5 1910.45   73.60
   3  -7  -5 1808.64   69.63
  -3   7   4    9.67    7.71
   3  -7  -4    8.22    7.38
  -3   7   3 3786.34  144.11
   3  -7  -3 3473.45  132.02
  -3   7   2  218.64   12.38
   3  -7  -2  211.36   11.39
  -3   7   1 1513.97   58.84
   3  -7  -1 1394.43   54.03
  -3   7   0  121.14    9.95
   3  -7   0  121.14    9.06
  -3   7  -1 2626.81  100.50
   3  -7   1 2276.56   87.09
  -3   7  -2 1123.57   44.18
   3  -7   2 1042.78   40.86
  -3   7  -3  268.42   13.50
   3  -7   3  229.15   11.91
  -3   7  -4 1141.78   44.69
   3  -7   4 1026.44   40.35
  -3   7  -5 1992.64   76.59
   3  -7   5 2051.94   78.69
   3  -7   5 1974.42   75.75
  -3   7  -6  993.28   39.41
   3  -7   6  887.28   35.35
   3  -7   6  933.04   37.03
  -3   7  -7    4.11    7.75
   3  -7   7    0.84    6.68
   3  -7   7    5.51    7.38
  -3   7  -8   37.22    8.41
   3  -7   8   34.79    7.29
   3  -7   8   44.97    7.99
  -3   7  -9  203.28   12.05
   3  -7   9  235.60   12.75
   3  -7   9  214.07   11.95
  -3   7 -10  554.78   23.82
   3  -7  10  638.84   26.52
   3  -7  10  609.42   25.45
   3  -7  11  196.46   11.91
   3  -7  11  172.13   11.67
   3  -7  12  478.20   20.78
   3  -7  12  455.41   20.36
   3  -7  13   64.44    9.11
   3  -7  13   67.95    9.15
   3  -7  14  145.98   11.72
   3  -7  14  157.66   11.21
   3  -7  15  182.03   11.58
   3  -7  15  204.96   12.70
  -3   6  14  446.95   19.52
   3  -6 -14  486.60   20.55
  -3   6  13  320.87   15.41
   3  -6 -13  333.10   15.60
  -3   6  12  286.36   14.57
   3  -6 -12  282.11   14.01
  -3   6  11  219.34   12.33
   3  -6 -11  222.66   12.09
  -3   6  10  472.59   20.78
   3  -6 -10  437.05   19.10
  -3   6   9  258.29   13.03
   3  -6  -9  248.34   12.84
  -3   6   8  799.02   32.04
  -3   6   7   78.17    8.59
   3  -6  -7   91.95    8.64
  -3   6   6  287.10   14.10
   3  -6  -6  279.40   13.59
  -3   6   5   -2.29    7.05
   3  -6  -5   11.91    7.14
  -3   6   4 1409.37   54.73
   3  -6  -4 1263.67   49.17
  -3   6   3  769.60   31.05
   3  -6  -3  677.13   27.60
  -3   6   2  606.62   25.22
   3  -6  -2  526.76   22.14
  -3   6   1  942.85   37.36
   3  -6  -1  821.43   32.78
  -3   6   0 1386.49   53.89
   3  -6   0 1364.07   52.91
  -3   6  -1 1495.29   57.86
   3  -6   1 1496.70   57.86
  -3   6  -2  722.43   29.19
   3  -6   2  637.91   25.92
  -3   6  -3 3290.40  125.20
   3  -6   3 3060.17  116.37
  -3   6  -4 2517.06   96.15
   3  -6   4 2339.61   89.29
  -3   6  -5  681.34   27.74
   3  -6   5  634.64   25.59
   3  -6   5  690.67   27.79
  -3   6  -6  430.10   18.87
   3  -6   6  427.43   18.31
   3  -6   6  434.77   18.59
  -3   6  -7  582.33   24.28
   3  -6   7  610.35   25.12
   3  -6   7  630.43   25.68
  -3   6  -8   77.89    8.69
   3  -6   8   57.25    7.57
   3  -6   8   73.69    8.03
  -3   6  -9  818.63   33.02
   3  -6   9  929.31   36.85
   3  -6   9  912.03   36.14
   3  -6  10   83.45    8.69
   3  -6  10   94.14    8.87
   3  -6  11  512.75   22.42
   3  -6  11  552.45   23.35
   3  -6  12   18.40    9.48
   3  -6  12   29.28    8.50
   3  -6  13  225.46   12.70
   3  -6  13  210.33   12.52
   3  -6  14   14.90    8.73
   3  -6  14    9.01    9.34
   3  -6  15   78.45    9.34
   3  -6  15   72.76   10.32
   3  -6  16   59.03    9.20
   3  -6  16   43.24    9.67
  -3   5  15  309.57   15.04
   3  -5 -15  285.19   13.59
  -3   5  14   45.25    8.69
   3  -5 -14   44.92    7.89
  -3   5  13   74.86    8.97
   3  -5 -13   93.35    9.11
  -3   5  12  151.72   10.93
   3  -5 -12  138.04    9.85
  -3   5  11  116.42    9.81
   3  -5 -11  109.28    8.92
  -3   5  10   68.83    8.78
   3  -5 -10   80.28    8.17
  -3   5   9   11.53    7.89
   3  -5  -9    2.15    7.33
  -3   5   8  -10.04    7.57
  -3   5   7    8.87    7.47
   3  -5  -7    6.16    6.82
  -3   5   6  326.14   15.13
   3  -5  -6  347.25   15.60
  -3   5   5  278.46   13.68
   3  -5  -5  243.77   12.33
  -3   5   4  258.85   13.45
   3  -5  -4  221.49   11.72
  -3   5   3 3575.26  135.94
   3  -5  -3 3546.77  134.77
  -3   5   2  188.90   10.74
   3  -5  -2  173.63   10.04
  -3   5   1 3374.45  128.33
   3  -5  -1 3162.91  120.25
  -3   5   0 1768.48   67.99
   3  -5   0 1626.52   62.48
  -3   5  -1   98.77    8.27
   3  -5   1   87.00    7.66
  -3   5  -2  484.27   20.45
   3  -5   2  428.93   18.21
  -3   5  -3 1325.31   51.18
   3  -5   3 1254.33   48.43
  -3   5  -4 1129.64   43.94
   3  -5   4 1066.60   41.42
   3  -5   4 1155.33   44.78
  -3   5  -5  296.86   13.92
   3  -5   5  292.71   13.26
   3  -5   5  260.63   12.42
  -3   5  -6 2780.44  105.96
   3  -5   6 2811.73  107.08
   3  -5   6 2936.89  111.66
  -3   5  -7 1391.16   53.84
   3  -5   7 1457.00   56.13
   3  -5   7 1467.74   56.65
  -3   5  -8  420.85   18.26
   3  -5   8  466.99   19.85
   3  -5   8  434.44   18.49
   3  -5   9  499.21   21.11
   3  -5   9  429.16   18.77
   3  -5  10   97.18    8.87
   3  -5  10  101.10    9.39
   3  -5  11  126.93    9.53
   3  -5  11  119.41   10.46
   3  -5  12  465.82   20.50
   3  -5  12  488.00   21.95
   3  -5  13    4.62    8.59
   3  -5  13   24.70    8.50
  -3   5 -14  536.57   22.65
   3  -5  14  511.35   22.37
   3  -5  14  495.47   21.53
  -3   5 -15    3.88    7.14
   3  -5  15   12.89    8.50
   3  -5  15   26.81   10.55
  -3   5 -16  310.69   15.60
   3  -5  16  271.97   14.43
   3  -5  16  245.45   13.40
  -3   4  16   57.49    8.08
   3  -4 -16   47.96    7.29
  -3   4  15    3.13    7.94
   3  -4 -15    5.32    7.24
  -3   4  14   98.11    9.71
   3  -4 -14  106.29    9.20
  -3   4  13   10.04    8.50
   3  -4 -13   -2.66    7.52
  -3   4  12   38.39    8.78
   3  -4 -12   58.98    7.99
  -3   4  11  262.17   13.73
   3  -4 -11  250.40   13.17
  -3   4  10  412.72   18.73
   3  -4 -10  372.42   17.00
  -3   4   9   61.36    8.69
   3  -4  -9   47.59    7.66
  -3   4   8  342.86   15.88
   3  -4  -8  362.85   16.30
  -3   4   7  755.12   30.40
   3  -4  -7  733.17   29.42
  -3   4   6 2712.26  103.48
   3  -4  -6 2620.27   99.94
  -3   4   5  160.64    9.99
   3  -4  -5  156.67    9.67
  -3   4   4 1144.12   44.74
   3  -4  -4 1043.72   40.81
  -3   4   3  101.01    8.31
   3  -4  -3  106.15    8.13
  -3   4   2 3545.37  134.59
   3  -4  -2 3455.24  131.18
  -3   4   1  380.59   16.72
   3  -4  -1  345.66   15.22
  -3   4   0  626.23   25.17
   3  -4   0  652.85   26.20
  -3   4  -1   16.58    7.24
   3  -4   1    0.51    5.60
  -3   4  -2  444.67   18.63
   3  -4   2  414.45   17.28
  -3   4  -3  429.91   17.93
   3  -4   3  397.03   16.62
  -3   4  -4  491.74   20.08
   3  -4   4  515.55   20.87
   3  -4   4  491.74   19.99
  -3   4  -5 3644.84  138.18
   3  -4   5 3826.96  145.09
   3  -4   5 3980.60  150.88
  -3   4  -6  386.25   16.53
   3  -4   6  425.80   17.75
   3  -4   6  428.04   18.12
   3  -4   7 4837.99  183.39
   3  -4   7 5132.19  194.31
   3  -4   8 1330.45   51.42
   3  -4   8 1300.56   50.39
  -3   4  -9 1591.96   61.18
   3  -4   9 1419.18   54.92
   3  -4   9 1442.53   55.76
  -3   4 -10   54.54    6.58
   3  -4  10   47.49    8.17
   3  -4  10   44.08    7.43
  -3   4 -11  972.74   38.39
   3  -4  11  924.64   37.17
   3  -4  11  838.71   33.48
  -3   4 -12   -4.25    6.72
   3  -4  12    4.72    7.47
   3  -4  12    0.28    9.01
  -3   4 -13   61.22    8.41
   3  -4  13   49.13    8.03
   3  -4  13   41.09    9.34
  -3   4 -14   29.28    7.89
   3  -4  14   32.55    8.17
   3  -4  14   10.23    8.92
  -3   4 -15  429.54   18.59
   3  -4  15  313.63   15.83
   3  -4  15  345.57   16.34
  -3   4 -16    9.11    8.31
   3  -4  16   16.30    8.50
   3  -4  16    4.20    8.59
  -3   3  17   58.79    8.13
   3  -3 -17   60.24    7.47
  -3   3  16   -9.11    8.31
   3  -3 -16    6.40    7.24
  -3   3  15  203.79   12.42
   3  -3 -15  220.42   12.05
  -3   3  14  257.54   14.15
   3  -3 -14  253.76   12.80
  -3   3  13  472.59   20.92
   3  -3 -13  461.57   19.99
  -3   3  12 1096.95   43.34
   3  -3 -12 1109.10   43.57
  -3   3  11 1152.53   45.25
   3  -3 -11 1140.85   44.69
  -3   3  10  195.39   11.86
   3  -3 -10  215.61   11.86
   3  -3  -9  535.63   22.28
  -3   3   8   36.75    7.47
   3  -3  -8   26.90    7.29
  -3   3   7   95.92    8.69
   3  -3  -7   81.44    8.03
  -3   3   6  841.98   33.53
   3  -3  -6  744.38   29.79
  -3   3   5   28.30    7.10
   3  -3  -5   30.96    7.66
  -3   3   4  647.71   26.20
   3  -3  -4  578.13   23.54
  -3   3   3 4968.75  188.20
   3  -3  -3 4767.94  180.54
  -3   3   2   52.54    6.58
   3  -3  -2   44.64    6.68
  -3   3   1 1004.49   39.04
   3  -3  -1  937.24   36.52
  -3   3   0  487.54   19.89
   3  -3   0  463.58   18.73
  -3   3  -1  114.79    7.24
   3  -3   1  104.93    6.07
  -3   3  -2  651.45   25.50
   3  -3   2  656.58   25.59
  -3   3  -3  171.01    8.59
   3  -3   3  193.29    9.15
   3  -3   3  207.44    9.57
  -3   3  -4 2568.43   97.60
   3  -3   4 2684.25  101.94
   3  -3   4 2801.46  106.33
   3  -3   5  618.29   24.47
   3  -3   5  604.28   23.96
  -3   3  -6 3612.62  136.92
   3  -3   6 3273.12  124.27
   3  -3   6 3225.48  122.40
  -3   3  -7 1062.40   41.14
   3  -3   7 1003.56   38.95
   3  -3   7  933.51   36.47
  -3   3  -8  352.34   15.13
   3  -3   8  347.39   15.13
   3  -3   8  323.16   14.48
  -3   3  -9  151.26    8.73
   3  -3   9  128.00    8.59
   3  -3   9  144.39    9.39
  -3   3 -10  171.57    9.62
   3  -3  10  160.83    9.85
   3  -3  10  166.67   10.69
  -3   3 -11   23.21    6.54
   3  -3  11   18.07    7.14
   3  -3  11   13.87    8.92
  -3   3 -12  539.84   22.51
   3  -3  12  465.59   20.22
   3  -3  12  469.32   21.11
  -3   3 -13   31.19    7.85
   3  -3  13   28.16    7.94
   3  -3  13   32.78    8.92
  -3   3 -14  355.14   16.25
   3  -3  14  295.74   15.32
   3  -3  14  324.79   15.74
  -3   3 -15   43.20    7.85
   3  -3  15   31.15    9.57
   3  -3  15   45.39    8.59
  -3   3 -16  176.75   11.39
   3  -3  16  146.26   10.69
   3  -3  16  118.75   10.13
  -3   2  17   10.09    8.03
  -3   2  17    8.64    7.71
   3  -2 -17    5.74    6.72
  -3   2  16  250.31   13.78
   3  -2 -16  256.94   12.89
  -3   2  15  258.34   13.73
   3  -2 -15  260.25   13.08
  -3   2  14  252.83   13.92
   3  -2 -14  281.92   13.92
  -3   2  13  763.52   31.15
   3  -2 -13  766.79   30.96
  -3   2  12 1332.78   52.02
   3  -2 -12 1341.66   52.16
  -3   2  11   13.36    7.80
   3  -2 -11    1.45    7.14
  -3   2  10 2141.14   82.10
   3  -2 -10 2115.92   81.02
   3  -2  -9  153.92    9.48
  -3   2   8 1023.17   40.16
   3  -2  -8 1054.93   41.42
  -3   2   7   28.11    7.19
   3  -2  -7   24.33    7.61
  -3   2   6  237.88   12.09
   3  -2  -6  222.75   11.53
  -3   2   5  870.00   34.32
   3  -2  -5  847.58   33.62
  -3   2   4   69.63    7.33
   3  -2  -4   64.30    7.14
  -3   2   3 1783.89   68.27
   3  -2  -3 1807.71   69.21
  -3   2   2  245.31   11.77
   3  -2  -2  238.07   11.67
  -3   2   1   12.09    5.51
   3  -2  -1   14.94    5.14
  -3   2  -1 2337.74   89.01
   3  -2   1 2273.76   86.53
  -3   2  -2   15.50    3.36
  -3   2  -4  153.41    7.52
   3  -2   4  110.30    6.21
   3  -2   4  115.72    6.49
  -3   2  -5 1689.56   64.40
   3  -2   5 1423.85   54.45
   3  -2   5 1492.03   57.07
  -3   2  -6   -0.56    5.18
   3  -2   6    1.63    5.46
   3  -2   6    2.99    5.28
  -3   2  -7  775.20   30.40
   3  -2   7  678.07   26.85
   3  -2   7  728.97   28.86
  -3   2  -8   -0.75    5.56
   3  -2   8    0.84    5.74
   3  -2   8    8.50    6.35
  -3   2  -9  264.74   12.28
   3  -2   9  253.90   12.56
   3  -2   9  248.58   12.14
  -3   2 -10   29.61    6.35
   3  -2  10   18.45    7.80
   3  -2  10   21.95    6.96
  -3   2 -11  173.95   10.32
   3  -2  11  163.07   11.07
   3  -2  11  156.16    9.95
  -3   2 -12  377.19   16.67
   3  -2  12  322.22   15.32
   3  -2  12  307.37   15.22
  -3   2 -13  453.63   19.66
   3  -2  13  409.64   18.96
   3  -2  13  435.28   19.19
  -3   2 -14   11.95    7.80
   3  -2  14   16.67    8.83
   3  -2  14   10.88    8.22
  -3   2 -15  361.50   16.58
   3  -2  15  295.23   14.99
   3  -2  15  295.84   14.62
  -3   2 -16  426.27   18.73
   3  -2  16  344.12   16.48
   3  -2  16  320.77   15.88
  -3   1  18   -2.38    7.80
  -3   1  18    3.78    8.31
   3  -1 -18    3.36    6.82
  -3   1  17  100.64    9.71
  -3   1  17  112.87    9.48
   3  -1 -17  132.34    9.48
  -3   1  16  134.54   10.37
  -3   1  16  126.32   10.41
   3  -1 -16  127.07    9.81
  -3   1  15  696.28   28.95
  -3   1  15  708.89   29.42
   3  -1 -15  723.83   29.47
  -3   1  14   97.32    9.90
   3  -1 -14  110.54    8.92
  -3   1  13  889.14   35.54
   3  -1 -13  895.68   35.54
  -3   1  12  119.69    9.85
   3  -1 -12  127.39    9.29
  -3   1  11  721.03   29.47
   3  -1 -11  746.71   30.07
  -3   1  10  347.11   16.02
   3  -1 -10  355.00   15.92
   3  -1  -9  341.55   15.36
  -3   1   8  102.83    8.64
   3  -1  -8  132.02    9.25
  -3   1   7   30.17    7.85
   3  -1  -7   33.44    7.47
  -3   1   6   68.60    7.71
   3  -1  -6   77.43    8.27
  -3   1   5  154.43    9.53
   3  -1  -5  154.15    9.62
  -3   1   4  818.63   32.50
   3  -1  -4  736.91   29.23
  -3   1   3 4006.29  151.86
   3  -1  -3 3987.61  151.16
  -3   1   2 1749.80   66.87
   3  -1  -2 1679.29   64.21
   3  -1   0  450.22   17.56
  -3   1  -3  354.26   14.06
   3  -1   3  320.26   12.80
   3  -1   3  289.35   11.72
  -3   1  -5   42.17    5.14
   3  -1   5   34.84    5.18
   3  -1   5   31.80    4.95
  -3   1  -6    7.33    5.32
   3  -1   6    7.24    5.37
   3  -1   6    7.94    5.37
  -3   1  -7  115.72    7.61
   3  -1   7  112.31    7.66
   3  -1   7   92.51    7.24
  -3   1  -8  240.31   11.44
   3  -1   8  221.40   11.02
   3  -1   8  191.14   10.27
  -3   1  -9  190.25   10.23
   3  -1   9  151.21    9.34
   3  -1   9  169.66   10.04
  -3   1 -10  170.08    9.81
   3  -1  10  144.21    9.29
   3  -1  10  167.32   10.13
  -3   1 -11   88.63    8.27
   3  -1  11   71.78    8.31
   3  -1  11   80.51    9.11
  -3   1 -12  719.16   29.14
   3  -1  12  627.63   25.96
   3  -1  12  629.03   26.24
  -3   1 -13  392.08   17.47
   3  -1  13  321.29   15.78
   3  -1  13  321.38   15.55
  -3   1 -14   -4.58    7.19
   3  -1  14   -3.08    8.73
   3  -1  14    6.35    8.36
  -3   1 -15   19.89    8.13
   3  -1  15   17.51    8.41
   3  -1  15   12.14    9.25
  -3   0  18  283.74   14.10
  -3   0  18  335.86   15.88
   3   0 -18  395.45   17.19
  -3   0  17  106.99   10.04
  -3   0  17  124.17    9.99
   3   0 -17  143.04    9.43
  -3   0  16  437.89   19.85
  -3   0  16  502.48   22.00
   3   0 -16  487.07   20.92
  -3   0  15  128.84   10.83
  -3   0  15  135.61   10.74
   3   0 -15  172.32   10.55
  -3   0  14 1058.19   42.17
  -3   0  14 1050.26   41.80
   3   0 -14 1124.97   44.18
  -3   0  13  106.89    9.95
  -3   0  13  109.37   10.18
   3   0 -13  107.45    9.11
  -3   0  12  515.55   22.51
  -3   0  12  532.37   22.98
   3   0 -12  519.29   21.90
  -3   0  11    7.38    7.85
  -3   0  11    8.69    7.94
   3   0 -11    5.09    6.58
  -3   0  10 1844.60   70.94
  -3   0  10 1694.70   65.33
   3   0 -10 1758.21   67.53
  -3   0   9   70.28    8.27
  -3   0   9   46.47    7.75
   3   0  -9   73.50    7.52
  -3   0   8  437.29   19.01
   3   0  -8  431.26   18.49
  -3   0   7  435.47   18.73
   3   0  -7  435.33   18.63
  -3   0   6   13.12    7.00
  -3   0   6   31.05    7.71
   3   0  -6   12.94    6.44
  -3   0   5   47.68    8.13
  -3   0   5   49.69    7.47
   3   0  -5   52.49    7.24
  -3   0   4  142.94    9.85
  -3   0   4  133.14    9.29
   3   0  -4  119.60    8.73
   3   0  -1   62.06    6.40
   3   0  -1   77.80    6.02
  -3   0   0  139.82    7.05
  -3   0   0  124.13    6.30
   3   0   0  162.51    7.80
  -3   0  -1  927.44   35.58
   3   0   1 1114.70   42.64
  -3   0  -2   28.16    3.78
   3   0   2   17.56    3.92
  -3   0  -3  190.72    8.83
   3   0   3  207.95    9.39
  -3   0  -4  262.07   11.58
   3   0   4  269.87   11.72
  -3   0  -5  739.71   28.95
   3   0   5  712.16   27.97
  -3   0  -6 1672.28   64.02
   3   0   6 1574.22   60.33
  -3   0  -7  726.63   28.63
   3   0   7  744.85   29.51
  -3   0  -8   46.79    6.07
   3   0   8   42.40    6.86
  -3   0  -9 1041.85   40.58
   3   0   9 1026.44   40.44
  -3   0 -10   58.51    6.91
   3   0  10   71.82    8.08
  -3   0 -11  220.79   11.30
   3   0  11  221.26   12.84
  -3   0 -12    1.26    6.77
   3   0  12    7.43    7.66
   3   0  12    4.44    8.73
  -3   0 -13  701.42   28.77
   3   0  13  571.13   24.19
   3   0  13  594.94   25.17
  -3   0 -14   96.43    8.55
   3   0  14   91.16    9.34
   3   0  14   90.27    9.39
  -3   0 -15    2.33    8.31
   3   0  15    6.30    8.27
   3   0  15    7.89    9.25
  -3  -1  18  108.43    9.29
  -3  -1  18   90.69    9.34
   3   1 -18  120.20    8.87
  -3  -1  17  178.34   11.86
  -3  -1  17  200.52   12.14
   3   1 -17  207.16   11.44
  -3  -1  16  190.34   12.09
  -3  -1  16  148.88   10.83
   3   1 -16  193.66   11.25
  -3  -1  15  579.53   24.70
  -3  -1  15  507.62   22.32
   3   1 -15  638.37   26.38
  -3  -1  14   18.12    9.06
  -3  -1  14   11.91    9.01
   3   1 -14    6.91    7.52
  -3  -1  13  648.65   27.23
  -3  -1  13  725.23   29.75
   3   1 -13  701.88   28.49
  -3  -1  12  339.36   16.25
  -3  -1  12  346.74   16.72
   3   1 -12  384.89   17.19
  -3  -1  11  794.81   31.94
  -3  -1  11  777.53   31.43
   3   1 -11  799.02   31.90
  -3  -1  10 1969.75   75.65
  -3  -1  10 2013.18   77.29
   3   1 -10 2028.59   77.66
  -3  -1   9 1947.81   74.76
  -3  -1   9 1920.25   73.83
   3   1  -9 2289.64   87.70
  -3  -1   8   76.12    8.36
  -3  -1   8   64.21    7.66
   3   1  -8   74.81    7.57
  -3  -1   7  606.15   25.03
  -3  -1   7  557.58   23.35
   3   1  -7  655.65   26.52
  -3  -1   6 2090.24   80.09
  -3  -1   6 2208.38   84.43
   3   1  -6 2199.05   83.96
  -3  -1   5  603.35   24.61
  -3  -1   5  645.84   26.43
   3   1  -5  625.76   25.31
  -3  -1   4 3915.69  148.46
  -3  -1   4 4109.49  155.83
   3   1  -4 3938.11  149.48
   3   1  -4 3973.13  150.60
  -3  -1   3 1977.23   75.56
  -3  -1   3 2002.91   76.68
   3   1  -3 1987.97   76.26
   3   1  -3 1961.35   74.90
  -3  -1   2 3517.82  133.51
  -3  -1   2 3300.20  125.20
   3   1  -2 3589.73  136.27
  -3  -1   1  492.21   19.94
  -3  -1   1  523.03   21.29
   3   1  -1  531.90   21.62
  -3  -1   0   25.73    5.42
   3   1   0   19.15    5.70
  -3  -1  -1    8.41    5.14
   3   1   1    6.86    5.60
  -3  -1  -2   59.49    5.74
   3   1   2   59.21    6.12
  -3  -1  -3  111.14    7.10
   3   1   3  109.98    6.91
  -3  -1  -4  168.26    8.69
   3   1   4  180.35    9.15
  -3  -1  -5  963.86   37.50
   3   1   5 1050.26   40.86
  -3  -1  -6    4.30    6.12
   3   1   6    1.03    6.07
  -3  -1  -7  162.61    9.06
   3   1   7  176.24    9.90
  -3  -1  -8  299.81   13.68
   3   1   8  298.50   13.96
  -3  -1  -9  221.59   11.35
   3   1   9  228.64   11.91
  -3  -1 -10  843.85   33.53
   3   1  10  796.21   32.08
  -3  -1 -11   62.90    7.52
   3   1  11   42.82    8.41
  -3  -1 -12  439.06   19.05
   3   1  12  459.24   20.50
  -3  -1 -13   97.79    8.03
   3   1  13   87.23    9.57
  -3  -1 -14  127.58    9.76
   3   1  14  120.44   10.65
   3   1  14   96.01    9.39
  -3  -1 -15   21.71    9.11
   3   1  15   47.54    9.06
   3   1  15   18.54    9.06
  -3  -2  18   57.02    8.13
  -3  -2  18   43.38    8.31
   3   2 -18   61.18    7.66
  -3  -2  17    0.98    9.43
  -3  -2  17    0.65    8.27
   3   2 -17    0.42    7.43
  -3  -2  16   55.01    8.73
  -3  -2  16   53.00    9.43
   3   2 -16   59.07    8.03
  -3  -2  15  145.05   11.16
  -3  -2  15  157.51   11.53
   3   2 -15  154.99   10.41
  -3  -2  14   95.92   10.32
  -3  -2  14   92.18    9.85
   3   2 -14  112.26    9.20
  -3  -2  13    5.32    8.45
  -3  -2  13   20.41    8.41
   3   2 -13    1.87    7.47
  -3  -2  12  950.32   37.97
  -3  -2  12  955.46   38.25
   3   2 -12 1037.18   40.86
  -3  -2  11  726.17   29.51
  -3  -2  11  713.09   29.14
   3   2 -11  742.98   29.84
  -3  -2  10  643.51   26.52
  -3  -2  10  688.81   28.16
   3   2 -10  672.00   27.13
  -3  -2   9 3987.61  151.35
  -3  -2   9 3853.58  146.45
  -3  -2   8  128.00    9.06
  -3  -2   8  153.59   10.37
   3   2  -8  152.99    9.71
   3   2  -7  278.89   13.26
  -3  -2   6   70.09    8.64
  -3  -2   6   81.77    8.92
   3   2  -6   80.65    8.13
   3   2  -6   71.31    9.53
  -3  -2   5 4121.17  156.44
  -3  -2   5 4513.44  171.01
   3   2  -5 4556.40  172.93
   3   2  -5 4483.08  169.84
  -3  -2   4  429.54   18.45
  -3  -2   4  407.77   18.17
   3   2  -4  434.86   19.15
   3   2  -4  406.56   17.47
  -3  -2   3 3957.72  150.04
  -3  -2   3 3947.45  149.81
   3   2  -3 3902.62  148.08
  -3  -2   2   21.95    6.68
  -3  -2   2    8.78    6.91
   3   2  -2    8.50    7.43
  -3  -2   1  162.47    9.67
   3   2  -1  193.89   10.69
  -3  -2   0  232.05   11.58
   3   2   0  288.04   13.36
  -3  -2  -1   -0.05    5.84
   3   2   1   -1.17    6.49
  -3  -2  -2    0.51    5.98
   3   2   2   -1.17    6.16
  -3  -2  -3    0.19    6.21
   3   2   3    9.43    5.84
  -3  -2  -4  479.13   19.80
   3   2   4  534.23   21.95
  -3  -2  -5 1889.43   72.34
   3   2   5 1994.97   76.40
  -3  -2  -6 1524.71   58.70
   3   2   6 1505.10   57.95
  -3  -2  -7  903.62   35.58
   3   2   7  992.82   38.95
  -3  -2  -8  995.15   39.09
   3   2   8 1039.51   40.81
  -3  -2  -9  157.09    9.95
   3   2   9  149.81    9.99
  -3  -2 -10   24.98    7.71
   3   2  10   28.81    7.94
  -3  -2 -11  164.80   10.60
   3   2  11  181.42   11.30
  -3  -2 -12  217.66   12.05
   3   2  12  190.16   11.44
  -3  -2 -13    5.42    6.86
   3   2  13   -2.94    8.55
  -3  -2 -14  401.56   17.84
   3   2  14  346.97   16.53
  -3  -3  18   -6.44    7.61
  -3  -3  18    8.22    8.45
   3   3 -18    8.31    7.14
  -3  -3  17   25.59    8.31
  -3  -3  17   11.35    8.97
   3   3 -17   13.54    7.38
  -3  -3  16    3.08    7.99
  -3  -3  16   11.39    8.69
   3   3 -16    5.65    7.57
  -3  -3  15   11.16    8.45
  -3  -3  15    4.48    8.22
   3   3 -15   26.20    7.80
  -3  -3  14  245.26   13.73
  -3  -3  14  236.86   13.08
   3   3 -14  253.81   12.75
  -3  -3  13  459.42   20.41
  -3  -3  13  422.48   19.01
   3   3 -13  470.72   20.22
  -3  -3  12   42.78    8.83
  -3  -3  12   59.77    9.06
   3   3 -12   50.48    7.89
  -3  -3  11  363.60   16.62
  -3  -3  11  365.79   16.95
   3   3 -11  402.17   17.75
  -3  -3  10 2044.47   78.45
  -3  -3  10 2154.21   82.66
   3   3 -10 2051.01   78.50
  -3  -3   9  245.54   13.45
  -3  -3   9  273.28   13.40
  -3  -3   8 2456.82   93.77
  -3  -3   8 2325.13   88.96
   3   3  -8 2564.70   98.16
   3   3  -8 2619.33   99.84
  -3  -3   7    2.66    7.33
  -3  -3   7   -4.25    7.71
   3   3  -7   -3.04    8.22
   3   3  -7   -8.45    7.24
  -3  -3   6 7093.54  268.24
  -3  -3   6 6832.03  258.43
   3   3  -6 7074.86  267.63
   3   3  -6 6990.81  264.41
  -3  -3   5  897.08   35.72
  -3  -3   5  866.73   34.42
   3   3  -5  893.81   35.77
  -3  -3   4 5052.81  191.28
  -3  -3   4 5024.79  190.44
   3   3  -4 5603.85  212.34
  -3  -3   3  972.74   38.20
  -3  -3   3 1002.62   39.55
   3   3  -3 1093.22   43.01
  -3  -3   2  864.86   34.32
   3   3  -2  981.14   38.71
  -3  -3   1  640.71   25.96
   3   3  -1  757.92   30.59
  -3  -3   0 1016.63   39.79
   3   3   0 1208.10   47.03
  -3  -3  -1  168.40    9.95
   3   3   1  195.15   10.79
  -3  -3  -2   39.97    7.43
   3   3   2   38.53    7.38
  -3  -3  -3   83.22    8.41
   3   3   3  104.56    8.41
  -3  -3  -4  452.23   19.29
   3   3   4  507.62   21.15
  -3  -3  -5  444.06   18.91
   3   3   5  482.87   20.31
  -3  -3  -6  294.62   13.92
   3   3   6  308.07   14.38
  -3  -3  -7 1498.56   57.95
   3   3   7 1579.82   61.08
  -3  -3  -8   27.32    7.29
   3   3   8   38.67    7.66
  -3  -3  -9   -4.20    7.14
   3   3   9    3.92    7.94
  -3  -3 -10    4.20    7.85
   3   3  10   -1.59    8.13
  -3  -3 -11  363.50   16.90
   3   3  11  401.94   18.17
  -3  -3 -12    3.78    7.43
   3   3  12    8.03    7.99
  -3  -3 -13  257.92   13.68
   3   3  13  255.82   13.68
  -3  -4  18   47.17    8.13
  -3  -4  18   41.70    8.22
   3   4 -18   41.24    7.33
  -3  -4  17  158.68   10.69
  -3  -4  17  173.44   11.21
   3   4 -17  202.86   11.21
  -3  -4  16   96.48    9.62
  -3  -4  16   88.96    9.53
   3   4 -16  102.50    9.25
  -3  -4  15  544.51   23.35
  -3  -4  15  552.45   23.77
   3   4 -15  580.00   24.28
  -3  -4  14  599.61   25.54
  -3  -4  14  572.99   24.61
   3   4 -14  629.03   25.82
  -3  -4  13  152.70   10.32
  -3  -4  13  158.54   11.49
   3   4 -13  161.39   10.27
  -3  -4  12 1853.01   71.54
  -3  -4  12 1866.55   72.06
   3   4 -12 1952.48   74.95
  -3  -4  11 1046.52   41.24
  -3  -4  11 1117.03   43.99
   3   4 -11 1183.35   46.28
  -3  -4  10  268.00   13.59
  -3  -4  10  252.22   13.54
   3   4 -10  267.49   12.98
   3   4 -10  255.77   13.73
  -3  -4   9  307.65   15.08
  -3  -4   9  267.16   13.45
   3   4  -9  368.22   17.79
  -3  -4   8   84.34    8.83
  -3  -4   8   94.85    8.78
  -3  -4   7 1658.27   64.07
  -3  -4   7 1634.46   62.95
   3   4  -7 1658.27   64.26
  -3  -4   6  429.49   18.49
  -3  -4   6  400.58   18.17
   3   4  -6  434.77   19.47
  -3  -4   5  357.06   16.30
  -3  -4   5  366.91   16.76
   3   4  -5  400.58   18.31
  -3  -4   4  170.17   10.97
  -3  -4   4  205.99   11.49
   3   4  -4  160.60   11.16
   3   4  -3 3233.42  123.10
  -3  -4   2 1319.71   51.37
   3   4  -2 1421.51   55.15
  -3  -4   1  549.64   22.93
   3   4  -1  657.99   26.99
  -3  -4   0  532.83   22.23
   3   4   0  632.30   26.06
  -3  -4  -1  313.72   14.99
   3   4   1  341.98   15.78
  -3  -4  -2    6.54    7.14
   3   4   2   11.07    7.38
  -3  -4  -3  625.76   25.68
   3   4   3  674.80   27.51
  -3  -4  -4  909.23   36.10
   3   4   4 1018.03   40.21
  -3  -4  -5  113.62    9.11
   3   4   5  136.97    9.25
  -3  -4  -6 1359.87   52.91
   3   4   6 1400.50   54.45
  -3  -4  -7    2.43    7.38
   3   4   7    7.94    7.85
  -3  -4  -8   11.16    7.89
   3   4   8    4.67    8.08
  -3  -4  -9   20.92    7.43
   3   4   9   17.19    8.45
  -3  -4 -10    7.85    8.45
   3   4  10   11.67    7.94
  -3  -4 -11   13.59    8.36
   3   4  11   17.89    8.22
  -3  -4 -12   71.31    9.15
   3   4  12   49.36    8.73
  -3  -4 -13   61.88    8.59
   3   4  13   70.80    9.01
  -3  -5  18   18.40    8.08
  -3  -5  18   32.83    8.08
   3   5 -18   36.28    7.19
  -3  -5  17   11.86    8.64
  -3  -5  17   16.53    8.36
   3   5 -17   21.29    7.10
  -3  -5  16  605.68   25.78
  -3  -5  16  555.72   23.86
   3   5 -16  619.23   25.54
  -3  -5  15   89.80    9.85
  -3  -5  15   95.92    9.57
   3   5 -15  103.39    8.87
  -3  -5  14 1111.43   44.18
  -3  -5  14 1068.00   42.31
   3   5 -14 1134.31   44.41
  -3  -5  13  619.69   25.78
  -3  -5  13  638.37   26.95
   3   5 -13  714.96   28.86
  -3  -5  12   22.18    9.25
  -3  -5  12   10.51    7.85
   3   5 -12   16.86    7.38
  -3  -5  11  757.45   30.77
  -3  -5  11  792.01   32.32
   3   5 -11  827.04   33.11
   3   5 -11  741.58   30.68
  -3  -5  10  780.80   31.90
   3   5 -10  789.21   32.36
  -3  -5   9  476.79   20.55
  -3  -5   9  472.59   20.83
   3   5  -9  511.82   22.37
  -3  -5   8   34.70    7.38
  -3  -5   8   27.23    8.55
   3   5  -8   15.64    8.31
  -3  -5   7  308.96   15.18
  -3  -5   7  319.09   14.90
   3   5  -7  355.89   17.00
  -3  -5   6  461.38   20.27
  -3  -5   6  515.55   21.90
   3   5  -6  523.49   22.79
  -3  -5   5  461.34   20.17
  -3  -5   5  488.94   20.78
   3   5  -5  525.36   22.79
  -3  -5   4   70.84    8.59
  -3  -5   4   48.43    7.52
   3   5  -4   94.10    9.67
  -3  -5   3  355.47   16.39
   3   5  -3  394.60   17.98
  -3  -5   2 3937.17  149.58
   3   5  -2 4599.36  174.65
  -3  -5   1 2825.74  107.83
   3   5  -1 3355.31  127.86
  -3  -5   0  969.93   38.39
   3   5   0 1152.99   45.39
  -3  -5  -1  986.28   39.13
   3   5   1 1042.32   41.19
  -3  -5  -2  988.15   39.23
   3   5   2 1082.48   42.78
  -3  -5  -3   95.08    8.78
   3   5   3  102.32    9.57
  -3  -5  -4 1183.35   46.51
   3   5   4 1296.36   50.67
  -3  -5  -5  367.10   17.05
   3   5   5  375.27   17.19
  -3  -5  -6  143.97    9.85
   3   5   6  158.40   11.11
  -3  -5  -7    8.03    8.03
   3   5   7   11.53    8.31
  -3  -5  -8  413.84   18.87
   3   5   8  428.46   19.24
  -3  -5  -9    3.50    7.75
   3   5   9    3.78    8.59
  -3  -5 -10    5.32    8.31
   3   5  10    9.01    8.36
  -3  -5 -11    0.84    8.27
   3   5  11   -4.58    8.08
  -3  -5 -12   22.70    8.87
   3   5  12   19.19    8.69
  -3  -6  18   10.93    8.36
  -3  -6  18  -12.80    7.24
   3   6 -18    0.75    6.44
  -3  -6  17  127.81   10.09
  -3  -6  17  110.12    9.90
   3   6 -17  107.41    8.27
  -3  -6  16   -5.09    8.50
  -3  -6  16   11.91    9.06
   3   6 -16    1.07    6.63
  -3  -6  15    3.74    7.75
  -3  -6  15   17.28    9.39
   3   6 -15   12.33    7.80
  -3  -6  14  452.09   20.22
  -3  -6  14  447.37   20.22
  -3  -6  13  178.11   11.35
  -3  -6  13  203.79   12.66
  -3  -6  12   41.52    8.22
  -3  -6  12   50.53    9.48
   3   6 -12   48.89    9.11
  -3  -6  11  744.85   30.26
  -3  -6  11  746.71   30.73
   3   6 -11  714.49   29.56
   3   6 -10   23.63    8.87
  -3  -6   9  797.61   32.18
  -3  -6   9  784.07   32.13
   3   6  -9  825.63   33.72
  -3  -6   8  121.70   10.37
  -3  -6   8  142.01    9.99
   3   6  -8  104.84   10.23
  -3  -6   7  855.05   34.56
  -3  -6   7  909.23   36.24
   3   6  -7  948.92   37.97
  -3  -6   6  194.59   11.07
  -3  -6   6  193.57   12.19
   3   6  -6  202.95   12.33
  -3  -6   5  428.55   18.91
  -3  -6   5  435.05   19.29
   3   6  -5  483.80   21.29
  -3  -6   4  945.65   37.97
   3   6  -4 1028.31   40.72
  -3  -6   3 4121.63  156.58
   3   6  -3 4693.23  178.11
  -3  -6   2  362.48   16.86
   3   6  -2  436.59   19.75
  -3  -6   1  282.39   14.71
   3   6  -1  335.86   16.20
  -3  -6   0   54.87    9.11
   3   6   0   49.27    8.27
  -3  -6  -1  252.73   13.59
   3   6   1  247.36   13.73
  -3  -6  -2  510.42   22.23
   3   6   2  543.11   23.30
  -3  -6  -3   35.44    8.41
   3   6   3   60.47    8.92
  -3  -6  -4  388.21   18.03
   3   6   4  443.17   19.94
  -3  -6  -5  156.02   11.21
   3   6   5  158.31   11.25
  -3  -6  -6  421.88   19.24
   3   6   6  451.67   20.45
  -3  -6  -7  582.80   24.94
   3   6   7  606.62   25.82
  -3  -6  -8   74.16    9.43
   3   6   8   63.23    9.11
  -3  -6  -9    0.79    8.59
   3   6   9   -4.48    8.03
  -3  -6 -10   26.34    7.80
   3   6  10   45.58    9.01
  -3  -6 -11    9.48    7.99
   3   6  11   -2.48    8.69
  -3  -7  17   45.16    7.43
  -3  -7  17   39.88    8.59
  -3  -7  16   88.17    9.43
  -3  -7  16   81.35    9.15
  -3  -7  15   87.19    8.59
  -3  -7  15   87.56   10.09
  -3  -7  14  106.24    9.48
  -3  -7  14  119.83   10.93
  -3  -7  13  460.78   20.59
  -3  -7  13  447.42   19.85
   3   7 -13  412.35   19.29
  -3  -7  12   48.38    8.03
  -3  -7  12   45.48    9.25
   3   7 -12   34.79    9.39
  -3  -7  11  113.15    9.25
  -3  -7  11  104.47   10.27
   3   7 -11  104.33   10.18
   3   7 -10 1087.15   43.29
  -3  -7   9  409.31   18.82
  -3  -7   9  427.53   18.77
   3   7  -9  399.79   18.87
  -3  -7   8  537.97   22.74
  -3  -7   8  586.54   24.89
   3   7  -8  617.36   26.24
  -3  -7   7   71.22    9.71
  -3  -7   7   46.09    8.22
   3   7  -7   52.54    9.53
  -3  -7   6  875.60   35.44
  -3  -7   6  913.89   36.47
   3   7  -6  956.86   38.62
  -3  -7   5 1080.61   42.59
  -3  -7   5 1068.47   42.64
   3   7  -5 1072.67   42.59
  -3  -7   4 3272.18  124.87
   3   7  -4 3572.46  136.17
  -3  -7   3   16.53    9.29
   3   7  -3   20.13    8.92
  -3  -7   2 1315.97   51.60
   3   7  -2 1443.46   56.23
  -3  -7   1   -6.35    9.15
   3   7  -1  -10.65    7.85
  -3  -7   0  181.80   11.77
   3   7   0  189.13   11.81
  -3  -7  -1   -6.02    9.11
   3   7   1    0.09    8.45
  -3  -7  -2   72.76    9.34
   3   7   2   89.99   10.09
  -3  -7  -3  192.54   12.28
   3   7   3  237.79   13.64
  -3  -7  -4  110.16   10.46
   3   7   4  138.79   11.16
  -3  -7  -5  425.89   19.71
   3   7   5  409.08   18.87
  -3  -7  -6  248.81   14.10
   3   7   6  239.47   13.59
  -3  -7  -7  507.15   22.23
   3   7   7  550.58   24.00
  -3  -7  -8   14.94    8.22
   3   7   8   13.96    8.36
  -3  -7  -9  309.19   15.36
   3   7   9  332.26   16.11
  -3  -7 -10   15.08    8.27
   3   7  10   29.61    8.92
  -3  -8  16    7.66    7.38
  -3  -8  16   -4.02    7.99
  -3  -8  15   37.50    8.69
  -3  -8  15   19.71    7.10
  -3  -8  14   -4.48    7.80
  -3  -8  14    4.30    8.50
   3   8 -14   -8.78    9.20
  -3  -8  13  597.28   24.84
  -3  -8  13  621.09   26.06
   3   8 -13  547.78   24.05
  -3  -8  12   -0.28    9.06
  -3  -8  12    5.70    7.47
   3   8 -12   -5.65    9.11
  -3  -8  11  194.17   12.61
  -3  -8  11  187.96   11.11
   3   8 -11  207.20   12.80
  -3  -8  10   55.20   10.60
   3   8 -10   51.51    9.71
  -3  -8   9  771.46   31.19
  -3  -8   9  754.19   30.87
   3   8  -9  741.11   30.59
  -3  -8   8   69.02    9.57
  -3  -8   8   73.18    7.99
   3   8  -8   63.98    9.62
  -3  -8   7  185.35   11.16
  -3  -8   7  158.78   11.30
   3   8  -7  186.51   12.19
  -3  -8   6 1227.71   48.52
  -3  -8   6 1195.96   46.79
   3   8  -6 1254.80   49.50
  -3  -8   5   83.40    8.87
  -3  -8   5   89.90    9.62
   3   8  -5   99.66   10.65
  -3  -8   4 2631.48  100.87
   3   8  -4 3019.08  115.35
  -3  -8   3 2929.41  111.94
   3   8  -3 3140.03  119.92
  -3  -8   2    1.87    9.29
   3   8  -2    1.87    8.45
  -3  -8   1   79.29   10.23
   3   8  -1   72.80    9.95
  -3  -8   0  108.85   10.83
   3   8   0  129.40   10.83
  -3  -8  -1  382.51   18.49
   3   8   1  354.26   17.00
  -3  -8  -2   96.81   10.04
   3   8   2   86.11    9.62
  -3  -8  -3  202.63   12.38
   3   8   3  219.67   13.08
  -3  -8  -4  336.00   16.44
   3   8   4  369.29   18.17
  -3  -8  -5   55.66    9.62
   3   8   5   46.33    9.67
  -3  -8  -6  557.58   24.19
   3   8   6  660.32   27.83
  -3  -8  -7   17.79    8.45
   3   8   7   10.04    8.45
  -3  -8  -8  301.95   15.18
   3   8   8  320.45   15.55
  -3  -9  15    1.96    6.82
  -3  -9  15    7.19    8.03
   3   9 -15   -6.12    8.31
  -3  -9  14  178.39   10.37
  -3  -9  14  198.14   12.09
   3   9 -14  174.33   11.58
  -3  -9  13   26.71    7.19
  -3  -9  13   26.06    8.36
   3   9 -13   16.16    8.87
  -3  -9  12  144.11   10.51
  -3  -9  12  146.35    9.81
   3   9 -12  139.86   11.11
  -3  -9  11  103.20   10.13
  -3  -9  11   99.09    8.92
   3   9 -11   84.66    9.90
  -3  -9   9    0.14    7.33
  -3  -9   9    8.50    8.92
   3   9  -9   16.06    9.01
  -3  -9   8    2.24    7.80
  -3  -9   8   -1.96    8.69
   3   9  -8   -1.03    9.25
  -3  -9   7   24.33    8.50
  -3  -9   7   -4.11    7.85
   3   9  -7   17.09    9.25
  -3  -9   6    8.97    9.29
  -3  -9   6   26.01    7.99
   3   9  -6   17.70    9.95
  -3  -9   5   32.36    8.45
  -3  -9   5   46.33    7.89
   3   9  -5   28.30    8.59
  -3  -9   4  394.93   18.82
   3   9  -4  430.10   19.61
  -3  -9   3  636.97   27.13
   3   9  -3  679.00   28.63
  -3  -9   2    8.97    8.69
   3   9  -2   -3.92    8.50
  -3  -9   1  877.00   35.72
   3   9  -1  892.88   36.28
  -3  -9   0    1.73    8.73
   3   9   0   11.86    9.39
  -3  -9  -1  194.27   13.22
   3   9   1  217.71   13.50
  -3  -9  -2  156.39   11.72
   3   9   2  172.83   11.95
  -3  -9  -3  329.23   16.48
   3   9   3  372.52   18.26
  -3  -9  -4   96.29   10.32
   3   9   4  124.22   11.11
  -3  -9  -5  314.66   15.78
   3   9   5  353.42   17.56
  -3  -9  -6   33.95    9.29
   3   9   6   18.87    8.83
  -3  -9  -7  235.41   12.94
   3   9   7  288.46   15.08
  -3 -10  14   13.59    8.50
  -3 -10  14   13.87    6.07
   3  10 -14   22.70    8.22
  -3 -10  13   90.08    9.11
  -3 -10  13  100.12    7.71
   3  10 -13   76.35    9.06
  -3 -10  12    1.17    8.27
  -3 -10  12    3.46    6.44
   3  10 -12    2.10    8.50
  -3 -10  11   -3.74    8.50
  -3 -10  11   -4.20    6.49
   3  10 -11   12.70    8.59
  -3 -10  10  135.94    9.53
  -3 -10  10  116.09   10.13
  -3 -10   9  313.86   15.78
  -3 -10   9  295.88   14.20
   3  10  -9  302.23   15.60
  -3 -10   8   -2.29    7.29
  -3 -10   8    9.99    9.20
   3  10  -8   -0.61    9.01
  -3 -10   7   42.45    9.76
  -3 -10   7   47.73    8.22
   3  10  -7   38.95    9.57
  -3 -10   6  107.97    9.11
  -3 -10   6  121.56   10.23
   3  10  -6  120.86   10.79
  -3 -10   5   72.29   10.18
  -3 -10   5   75.84    8.17
   3  10  -5   81.77   10.41
  -3 -10   4   58.42    9.20
   3  10  -4   68.51    9.62
  -3 -10   3   -7.05    8.59
   3  10  -3   23.26    8.97
  -3 -10   2  483.33   21.43
   3  10  -2  522.56   22.70
  -3 -10   1   94.14   10.13
   3  10  -1   87.09    9.71
  -3 -10   0  481.00   22.14
   3  10   0  458.21   20.64
  -3 -10  -1    3.13    9.62
   3  10   1    6.02    9.29
  -3 -10  -2  295.14   15.55
   3  10   2  392.74   18.54
  -3 -10  -3   20.36    9.06
   3  10   3   31.57    9.20
  -3 -10  -4  465.26   20.73
   3  10   4  510.88   22.23
  -3 -10  -5    0.89    7.94
   3  10   5    5.46    9.11
  -3 -11  12   66.03    8.41
  -3 -11  12   56.13    6.30
   3  11 -12   58.79    8.08
  -3 -11  11  126.83    8.36
  -3 -11  11  121.98    9.81
   3  11 -11  129.40    9.95
  -3 -11  10   37.27    8.83
  -3 -11  10   44.92    7.10
  -3 -11   9  211.03   11.07
  -3 -11   9  212.85   11.81
   3  11  -9  220.65   12.47
  -3 -11   8   24.52    7.00
  -3 -11   8   22.65    8.17
   3  11  -8   28.49    8.92
  -3 -11   7   33.44    7.14
  -3 -11   7   31.01    8.27
   3  11  -7   38.62    9.25
  -3 -11   6  144.30   10.69
  -3 -11   6  160.50   10.13
   3  11  -6  159.06   11.53
  -3 -11   5  259.60   12.89
  -3 -11   5  234.85   13.08
   3  11  -5  280.15   14.52
  -3 -11   4   10.41    8.73
   3  11  -4    6.96    8.27
  -3 -11   3  997.02   40.07
   3  11  -3 1029.24   40.91
  -3 -11   2   14.34    8.87
   3  11  -2   28.63    8.87
  -3 -11   1  279.07   14.80
   3  11  -1  319.61   16.06
  -3 -11   0  100.31   10.13
   3  11   0   98.81    9.85
  -3 -11  -1    7.14    8.92
   3  11   1   -0.28    9.15
  -3 -11  -2   48.94    8.92
   3  11   2   55.85    9.53
  -3 -12   9   19.33    7.94
   3  12  -9   14.52    7.61
  -3 -12   8   77.47    7.19
  -3 -12   8   59.63    7.85
   3  12  -8   73.83    8.27
  -3 -12   7   -2.85    6.63
  -3 -12   7    3.97    7.47
   3  12  -7    4.76    7.66
  -3 -12   6  129.54    8.83
  -3 -12   6  111.94    9.43
   3  12  -6  130.10    9.99
  -3 -12   5   -5.18    6.91
  -3 -12   5    1.68    7.94
   3  12  -5    6.77    7.89
  -3 -12   4  242.37   12.89
   3  12  -4  263.47   13.96
  -3 -12   3   -1.87    9.25
   3  12  -3   12.38    7.80
  -3 -12   2  225.04   12.75
   3  12  -2  276.32   14.06
  -3 -12   1   50.11    9.48
   3  12  -1   37.87    8.50
  -4  13   3  247.13   12.75
   4 -13  -3  241.71   12.66
  -4  13   2   -2.94    8.03
   4 -13  -2   12.05    7.85
  -4  13   1  130.52    9.90
   4 -13  -1  134.91    9.85
  -4  13   0   20.73    8.08
   4 -13   0    2.15    7.85
  -4  13  -1   39.79    8.45
   4 -13   1   47.91    8.17
  -4  13  -2   -2.57    8.92
   4 -13   2   13.68    8.50
  -4  13  -3  650.51   27.04
   4 -13   3  734.10   29.98
  -4  13  -4   18.96    8.31
   4 -13   4   31.47    8.50
  -4  13  -5   70.09    8.73
   4 -13   5   88.12   10.18
  -4  13  -6   71.87    8.92
   4 -13   6   77.15    8.31
   4 -13   6   81.77    9.81
  -4  13  -7  270.85   14.99
   4 -13   7  319.51   15.27
   4 -13   7  297.98   15.50
  -4  13  -8   15.69    9.06
   4 -13   8   13.17    7.43
   4 -13   8   15.60    8.55
  -4  12   6   45.86    7.99
   4 -12  -6   47.12    7.52
  -4  12   5   -1.77    7.66
   4 -12  -5    1.21    7.43
  -4  12   4  116.47    9.67
   4 -12  -4  120.81    9.43
  -4  12   3   58.33   10.18
   4 -12  -3   60.94    8.55
  -4  12   2   42.31    8.64
   4 -12  -2   39.04    8.31
  -4  12   1  107.97    9.71
   4 -12  -1  122.82   10.55
  -4  12   0  795.28   32.46
   4 -12   0  743.44   30.26
  -4  12  -1   36.75    8.45
   4 -12   1   22.60    8.59
  -4  12  -2  235.60   13.36
   4 -12   2  272.86   14.43
  -4  12  -3   -3.69    8.92
   4 -12   3   -2.90    9.06
  -4  12  -4  341.79   16.34
   4 -12   4  408.47   18.73
  -4  12  -5  -10.23    8.69
   4 -12   5    3.46    8.50
  -4  12  -6  106.05    9.62
   4 -12   6  135.89    9.99
   4 -12   6  150.04   10.79
  -4  12  -7   18.63    9.06
   4 -12   7   42.78    7.89
   4 -12   7   24.33    8.03
  -4  12  -8   69.63    9.99
   4 -12   8   98.16    9.15
   4 -12   8  103.90   10.32
  -4  12  -9   86.63   10.04
   4 -12   9  105.26    9.39
   4 -12   9  100.50   10.41
  -4  12 -10  114.46   10.37
   4 -12  10  133.70   10.93
   4 -12  10  152.24   10.51
  -4  11   8  137.20    9.39
   4 -11  -8  110.91    8.41
  -4  11   7   96.53    8.92
   4 -11  -7   90.55    8.36
  -4  11   6   -5.56    8.22
   4 -11  -6   -1.96    7.57
  -4  11   5  258.34   13.59
   4 -11  -5  270.99   13.87
  -4  11   4   85.97    8.69
   4 -11  -4   94.00    9.43
  -4  11   3  544.04   23.30
   4 -11  -3  615.02   25.78
  -4  11   2   12.61    9.39
   4 -11  -2   -7.94    8.22
  -4  11   1  421.22   19.52
   4 -11  -1  412.86   18.87
  -4  11   0   49.50    8.78
   4 -11   0   45.11    8.69
  -4  11  -1  667.33   27.79
   4 -11   1  755.12   31.47
  -4  11  -2   98.53    9.71
   4 -11   2  100.26   10.09
  -4  11  -3  740.18   30.63
   4 -11   3  775.20   31.85
  -4  11  -4  119.78   10.46
   4 -11   4  135.89   10.37
  -4  11  -5   60.38    9.29
   4 -11   5   70.14    9.11
  -4  11  -6  236.16   13.31
   4 -11   6  264.92   13.96
   4 -11   6  279.40   14.57
  -4  11  -7  479.13   21.39
   4 -11   7  467.92   20.55
   4 -11   7  491.27   21.20
  -4  11  -8  284.86   15.13
   4 -11   8  319.56   15.50
   4 -11   8  338.61   16.34
  -4  11  -9  158.26   12.14
   4 -11   9  169.98   11.02
   4 -11   9  156.67   11.11
  -4  11 -10   65.57    9.76
   4 -11  10   65.28    9.43
   4 -11  10   61.32    8.22
  -4  11 -11  112.68   10.60
   4 -11  11  142.10   10.79
   4 -11  11  133.79    9.99
  -4  11 -12  385.83   18.03
   4 -11  12  498.28   21.67
   4 -11  12  461.20   20.13
  -4  10  10   -6.07    6.35
   4 -10 -10    4.06    6.12
  -4  10   9   -3.27    7.05
   4 -10  -9   18.82    7.14
  -4  10   8   72.57    8.36
   4 -10  -8   59.82    8.22
  -4  10   7  155.13   10.04
   4 -10  -7  153.78   10.41
  -4  10   6  567.86   24.19
   4 -10  -6  574.39   24.24
  -4  10   5   26.38    8.64
   4 -10  -5   29.37    8.50
  -4  10   4  262.91   13.87
   4 -10  -4  271.41   14.29
  -4  10   3    1.68    7.99
   4 -10  -3    4.25    8.41
  -4  10   2  502.95   21.90
   4 -10  -2  539.37   23.12
  -4  10   1  335.72   16.90
   4 -10  -1  319.28   16.20
  -4  10   0  523.96   22.98
   4 -10   0  505.75   22.28
  -4  10  -1    9.48    8.27
   4 -10   1   15.22    8.36
  -4  10  -2  650.05   27.23
   4 -10   2  663.12   27.51
  -4  10  -3   87.93    9.39
   4 -10   3   76.03    9.71
  -4  10  -4  784.07   32.13
   4 -10   4  865.33   34.88
  -4  10  -5    9.76    7.94
   4 -10   5   13.50    7.80
  -4  10  -6   17.09    8.41
   4 -10   6   27.83    8.45
   4 -10   6   13.59    8.50
  -4  10  -7   90.08    9.90
   4 -10   7  111.56    9.95
   4 -10   7  110.58   10.13
  -4  10  -8  447.00   20.27
   4 -10   8  553.85   23.86
   4 -10   8  526.30   22.60
  -4  10  -9  391.57   18.35
   4 -10   9  389.93   17.79
   4 -10   9  387.13   17.61
  -4  10 -10   43.29    9.48
   4 -10  10   60.38    8.64
   4 -10  10   62.44    9.25
  -4  10 -11   -8.78    8.92
   4 -10  11   16.58    9.25
   4 -10  11    1.12    7.43
  -4  10 -12    3.41    9.01
   4 -10  12   16.72    8.92
   4 -10  12    3.41    7.89
   4 -10  13   61.74    9.43
   4 -10  13   58.65    8.55
   4  -9 -11   45.44    7.05
  -4   9  10   10.88    7.14
   4  -9 -10    2.33    6.54
  -4   9   9  106.15    8.45
   4  -9  -9   96.95    8.69
  -4   9   8  106.89    9.39
   4  -9  -8  121.56    9.48
  -4   9   7  858.32   34.60
   4  -9  -7  911.56   36.47
  -4   9   6    3.74    7.89
   4  -9  -6   -2.48    8.17
  -4   9   5  637.44   26.62
   4  -9  -5  680.87   28.16
  -4   9   4    0.28    7.94
   4  -9  -4   18.35    8.36
  -4   9   3  251.99   13.59
   4  -9  -3  264.13   13.82
  -4   9   2   20.78    8.64
   4  -9  -2   35.49    8.08
  -4   9   1  431.68   19.52
   4  -9  -1  398.48   18.31
  -4   9   0  343.52   16.34
   4  -9   0  280.94   14.29
  -4   9  -1 1057.26   41.84
   4  -9   1 1062.40   41.98
  -4   9  -2   52.30    9.06
   4  -9   2   42.59    8.73
  -4   9  -3 1481.29   57.72
   4  -9   3 1499.50   58.28
  -4   9  -4   10.83    8.55
   4  -9   4    9.90    8.22
  -4   9  -5   32.88    8.36
   4  -9   5   27.55    8.55
  -4   9  -6  164.01   11.16
   4  -9   6  142.66   10.41
   4  -9   6  143.55   10.55
  -4   9  -7  489.40   21.39
   4  -9   7  571.13   24.05
   4  -9   7  535.63   22.79
  -4   9  -8  628.57   26.43
   4  -9   8  698.61   28.77
   4  -9   8  733.64   30.07
  -4   9  -9  153.87   11.02
   4  -9   9  185.81   11.53
   4  -9   9  200.34   12.24
  -4   9 -10  471.19   20.87
   4  -9  10  530.97   22.51
   4  -9  10  597.28   25.03
  -4   9 -11   28.77    9.25
   4  -9  11   18.35    8.27
   4  -9  11   12.14    7.89
   4  -9  12  117.59    9.95
   4  -9  12  131.83   10.55
   4  -9  13   14.99    8.50
   4  -9  13   18.17    8.97
   4  -9  14    1.82    8.97
   4  -9  14   -1.96    8.73
  -4   8  12  285.66   13.31
   4  -8 -12  269.27   12.80
  -4   8  11  195.57   11.35
   4  -8 -11  199.03   11.44
  -4   8  10  536.10   22.60
   4  -8 -10  469.79   20.17
  -4   8   9   75.00    8.64
   4  -8  -9   71.45    8.78
  -4   8   8   61.55    8.50
   4  -8  -8   44.55    8.45
  -4   8   7  238.21   13.08
   4  -8  -7  233.07   12.98
  -4   8   6   38.01    8.08
   4  -8  -6   47.68    8.55
  -4   8   5    6.54    7.66
   4  -8  -5    4.90    7.89
  -4   8   4  188.66   11.86
   4  -8  -4  178.34   11.16
  -4   8   3  280.19   14.15
   4  -8  -3  278.70   14.57
  -4   8   2    3.64    7.47
   4  -8  -2   -9.85    7.71
  -4   8   1  174.14   11.02
   4  -8  -1  157.56   10.65
  -4   8   0  437.52   19.80
   4  -8   0  385.03   17.47
  -4   8  -1  170.64   10.93
   4  -8   1  177.74   10.83
  -4   8  -2  771.93   31.24
   4  -8   2  748.58   30.21
  -4   8  -3  665.92   27.51
   4  -8   3  650.51   26.66
  -4   8  -4 1022.70   40.49
   4  -8   4 1048.39   41.19
  -4   8  -5 1358.00   52.91
   4  -8   5 1561.61   60.43
   4  -8   5 1398.16   54.22
  -4   8  -6  191.61   11.81
   4  -8   6  179.37   10.83
   4  -8   6  175.77   10.74
  -4   8  -7  896.15   35.96
   4  -8   7  885.41   35.35
   4  -8   7  895.68   35.82
  -4   8  -8   50.85    8.59
   4  -8   8   62.44    8.13
   4  -8   8   52.35    8.27
  -4   8  -9  834.97   33.76
   4  -8   9  988.15   39.27
   4  -8   9 1018.50   40.39
  -4   8 -10   30.31    8.59
   4  -8  10   42.31    8.73
   4  -8  10   43.10    8.27
   4  -8  11  526.76   22.37
   4  -8  11  520.22   22.28
   4  -8  12   13.87    7.75
   4  -8  12   -1.68    8.59
   4  -8  13  104.98    9.85
   4  -8  13   87.61   10.18
   4  -8  14   21.81    8.45
   4  -8  14   24.05    9.39
   4  -7 -14   10.18    6.30
  -4   7  13  210.56   11.11
   4  -7 -13  235.08   11.81
  -4   7  12   -2.48    7.05
   4  -7 -12    7.66    7.10
  -4   7  11 1122.64   44.13
  -4   7  10  246.38   12.89
   4  -7 -10  222.10   12.38
  -4   7   9  148.97    9.81
   4  -7  -9  143.83   10.18
  -4   7   8   82.42    8.64
   4  -7  -8   89.38    9.25
  -4   7   7   23.68    7.61
   4  -7  -7   15.22    7.80
  -4   7   6 1239.85   48.57
   4  -7  -6 1192.22   46.75
  -4   7   5  465.40   20.41
   4  -7  -5  431.82   19.05
  -4   7   4 1781.56   68.79
   4  -7  -4 1728.79   66.69
  -4   7   3   -1.35    7.33
   4  -7  -3    6.26    7.85
  -4   7   2   27.09    7.29
   4  -7  -2   21.01    7.85
  -4   7   1  458.82   19.66
   4  -7  -1  424.77   18.45
  -4   7   0  208.46   11.44
   4  -7   0  185.02   10.46
  -4   7  -1  969.93   38.34
   4  -7   1  900.35   35.58
  -4   7  -2 1592.43   61.50
   4  -7   2 1564.88   60.29
  -4   7  -3  546.84   22.88
   4  -7   3  522.56   21.81
  -4   7  -4 1501.37   58.05
   4  -7   4 1426.65   55.10
  -4   7  -5  793.41   32.08
   4  -7   5  799.02   31.85
   4  -7   5  765.39   30.63
  -4   7  -6  950.32   37.69
   4  -7   6  912.49   36.14
   4  -7   6  991.88   39.04
  -4   7  -7   21.01    7.66
   4  -7   7   22.14    6.96
   4  -7   7   13.26    6.91
  -4   7  -8  611.75   25.50
   4  -7   8  691.61   28.07
   4  -7   8  695.81   28.35
  -4   7  -9   17.42    7.85
   4  -7   9   18.54    8.13
   4  -7   9   20.92    7.43
   4  -7  10  730.84   29.61
   4  -7  10  643.51   26.81
   4  -7  11   25.31    7.66
   4  -7  11   22.88    8.50
   4  -7  12  362.90   16.62
   4  -7  12  325.30   15.97
   4  -7  13    1.26    9.20
   4  -7  13    1.82    7.66
   4  -7  14   -3.22    8.13
   4  -7  14    3.13    9.29
   4  -7  15   45.86    9.53
   4  -7  15   21.11    8.41
  -4   6  14  224.01   11.81
   4  -6 -14  203.37   10.74
  -4   6  13   89.66    8.64
   4  -6 -13   83.03    8.22
  -4   6  12  786.87   31.76
   4  -6 -12  750.92   30.26
  -4   6  11  288.69   14.38
  -4   6  10  101.99    9.34
   4  -6 -10   90.36    8.73
  -4   6   9   39.69    7.94
   4  -6  -9   31.71    7.57
  -4   6   8  186.05   11.53
   4  -6  -8  170.22   10.69
  -4   6   7   32.83    7.89
   4  -6  -7   41.05    7.85
  -4   6   6   50.34    7.99
   4  -6  -6   49.55    7.61
  -4   6   5  155.27   10.04
   4  -6  -5  137.15    9.34
  -4   6   4 1320.64   51.42
   4  -6  -4 1234.25   48.19
  -4   6   3  481.93   20.55
   4  -6  -3  446.49   19.10
  -4   6   2   27.37    7.38
   4  -6  -2   42.17    7.75
  -4   6   1    3.50    7.10
   4  -6  -1    3.69    7.14
  -4   6   0   14.43    7.38
   4  -6   0   19.89    6.77
  -4   6  -1  825.63   32.97
   4  -6   1  757.45   30.12
  -4   6  -2  566.92   23.35
   4  -6   2  541.24   22.04
  -4   6  -3 2045.87   78.36
   4  -6   3 2045.41   78.08
  -4   6  -4  769.60   30.68
   4  -6   4  723.83   28.67
  -4   6  -5 2211.19   84.57
   4  -6   5 2233.60   85.27
   4  -6   5 2279.83   87.00
  -4   6  -6  124.73    8.78
   4  -6   6  111.33    8.31
   4  -6   6  127.02    8.08
  -4   6  -7  135.94    9.11
   4  -6   7  146.07    9.43
   4  -6   7  163.31    9.67
  -4   6  -8  258.29   12.98
   4  -6   8  279.03   13.17
   4  -6   8  245.03   12.66
   4  -6   9 2282.64   87.37
   4  -6   9 2316.26   88.63
   4  -6  10  149.81   10.37
   4  -6  10  176.99   10.37
   4  -6  11 1078.27   42.78
   4  -6  11 1068.93   41.94
   4  -6  12   58.09    7.99
   4  -6  12   64.96    9.76
   4  -6  13  451.11   19.66
   4  -6  13  478.20   21.29
   4  -6  14   68.32   10.69
   4  -6  14   57.72    8.50
   4  -6  15   -1.59    8.36
   4  -6  15  -11.44    8.92
  -4   5  15   13.68    7.00
   4  -5 -15    5.32    6.49
  -4   5  14  160.83   10.55
   4  -5 -14  164.80   10.27
  -4   5  13  233.49   12.89
   4  -5 -13  249.46   12.66
  -4   5  12   14.15    8.31
   4  -5 -12   15.08    7.52
  -4   5  11  189.08   11.63
   4  -5 -11  202.21   11.95
  -4   5  10  148.36   10.32
   4  -5 -10  135.43    9.67
  -4   5   9   29.23    7.80
   4  -5  -9   34.70    7.47
  -4   5   8  177.27   11.39
   4  -5  -8  176.24   10.46
  -4   5   7  318.53   15.32
   4  -5  -7  325.35   14.99
  -4   5   6  505.75   21.71
   4  -5  -6  522.56   21.76
  -4   5   5   17.42    7.29
   4  -5  -5   17.51    7.57
  -4   5   4  471.19   20.41
   4  -5  -4  441.58   19.24
  -4   5   3 2588.51   98.81
   4  -5  -3 2363.42   90.27
  -4   5   2  740.18   29.65
   4  -5  -2  680.87   27.46
  -4   5   1  532.37   22.04
   4  -5  -1  503.88   20.92
  -4   5   0  149.44    9.06
   4  -5   0  142.99    8.41
  -4   5  -1   -2.71    6.44
   4  -5   1    3.88    5.60
  -4   5  -2  208.09   10.41
   4  -5   2  210.19   10.27
  -4   5  -3 2733.28  103.95
   4  -5   3 2896.26  109.98
  -4   5  -4  517.42   21.11
   4  -5   4  537.04   21.57
   4  -5   4  561.79   22.56
  -4   5  -5   95.73    7.61
   4  -5   5   92.79    6.68
   4  -5   5  110.21    7.38
  -4   5  -6   61.04    6.68
   4  -5   6   49.73    6.30
   4  -5   6   62.30    6.40
  -4   5  -7   -4.20    5.98
   4  -5   7    9.43    5.74
   4  -5   7    8.92    5.88
   4  -5   8 1177.74   45.81
   4  -5   8 1203.43   46.61
   4  -5   9   24.94    6.82
   4  -5   9   19.85    7.71
   4  -5  10 1232.38   47.91
   4  -5  10 1236.12   48.43
   4  -5  11   36.71    7.57
   4  -5  11   49.36    8.92
   4  -5  12  349.54   16.72
   4  -5  12  351.41   16.11
   4  -5  13   29.19    7.80
   4  -5  13   39.46    9.34
   4  -5  14  302.28   14.80
   4  -5  14  266.23   14.34
   4  -5  15  139.96   10.41
   4  -5  15  119.41   10.51
  -4   4  16   99.47    9.06
   4  -4 -16  103.16    7.89
  -4   4  15   41.66    8.41
   4  -4 -15   32.88    7.10
  -4   4  14  340.57   16.34
   4  -4 -14  324.79   15.22
  -4   4  13  123.56    9.81
   4  -4 -13  140.14    9.76
  -4   4  12  205.85   12.38
   4  -4 -12  196.37   11.11
  -4   4  11  147.57   10.41
   4  -4 -11  165.92   10.55
  -4   4  10  227.10   12.42
   4  -4 -10  229.52   12.14
  -4   4   9    1.21    7.80
   4  -4  -9    6.91    7.05
  -4   4   8  361.31   16.90
   4  -4  -8  325.12   14.85
  -4   4   7 1764.75   67.99
   4  -4  -7 1663.41   64.02
  -4   4   6 3090.99  117.68
   4  -4  -6 2760.36  105.26
  -4   4   5    5.74    7.24
   4  -4  -5    2.85    6.91
  -4   4   4 2198.58   84.06
   4  -4  -4 2132.73   81.58
  -4   4   3  524.43   21.67
   4  -4  -3  510.88   21.15
  -4   4   2  580.93   23.63
   4  -4  -2  551.05   22.51
  -4   4   1  433.88   18.40
   4  -4  -1  413.05   17.28
  -4   4   0 4015.63  152.19
   4  -4   0 3892.34  147.47
  -4   4  -1  119.74    7.61
   4  -4   1  109.65    6.54
  -4   4  -2  480.53   19.33
   4  -4   2  456.53   18.21
  -4   4  -3  720.56   28.16
   4  -4   3  735.97   28.58
   4  -4   3  675.73   26.48
  -4   4  -4 2115.45   80.56
   4  -4   4 2292.91   87.14
   4  -4   4 2390.51   90.92
  -4   4  -5    0.93    5.32
   4  -4   5    1.87    5.23
   4  -4   5    2.62    4.44
   4  -4   6  853.65   33.30
   4  -4   6  932.57   36.14
   4  -4   7  524.89   21.29
   4  -4   7  573.93   23.02
   4  -4   8  155.46    8.78
   4  -4   8  143.55    8.92
   4  -4   9 2478.77   94.52
   4  -4   9 2543.68   97.13
   4  -4  10  480.53   20.27
   4  -4  10  500.61   21.48
  -4   4 -11  685.07   27.51
   4  -4  11  621.56   26.06
   4  -4  11  658.45   26.81
  -4   4 -12  352.90   16.02
   4  -4  12  281.92   14.48
   4  -4  12  315.82   14.80
  -4   4 -13  367.38   16.67
   4  -4  13  327.55   15.60
   4  -4  13  283.98   14.80
  -4   4 -14   85.09    8.59
   4  -4  14   64.49    8.87
   4  -4  14   71.96    9.71
  -4   4 -15   92.56    9.11
   4  -4  15  101.38    9.67
   4  -4  15   69.53    9.34
  -4   3  17  262.77   12.94
   4  -3 -17  267.77   12.66
  -4   3  16   56.55    8.55
   4  -3 -16   52.40    7.29
  -4   3  15  149.16   10.65
   4  -3 -15  157.28   10.13
  -4   3  14  855.99   34.37
   4  -3 -14  874.20   34.79
  -4   3  13 1428.98   55.66
   4  -3 -13 1411.24   54.68
  -4   3  12  237.84   13.82
   4  -3 -12  279.17   13.73
  -4   3  11 2429.74   93.02
   4  -3 -11 2497.92   95.45
  -4   3  10  734.10   29.89
   4  -3 -10  670.13   27.23
  -4   3   9  464.98   19.94
   4  -3  -9  418.00   18.03
  -4   3   8  156.53    9.85
   4  -3  -8  147.66    9.90
  -4   3   7  498.28   21.06
   4  -3  -7  475.86   20.22
  -4   3   6  508.08   21.43
   4  -3  -6  468.86   19.94
  -4   3   5  554.78   23.12
   4  -3  -5  497.81   21.01
  -4   3   4   29.75    6.63
   4  -3  -4   34.70    7.10
  -4   3   3    8.41    6.44
   4  -3  -3    1.59    6.58
  -4   3   2  549.18   22.18
   4  -3  -2  514.62   20.92
  -4   3   1 2163.09   82.33
   4  -3  -1 2013.65   76.68
  -4   3   0  280.52   12.00
   4  -3   0  268.75   11.49
  -4   3  -1  107.31    6.16
   4  -3   1  104.09    5.70
  -4   3  -2 1013.83   38.95
   4  -3   2 1102.09   42.22
   4  -3   2 1032.51   39.60
  -4   3  -3   -0.42    3.55
   4  -3   3    1.17    3.41
   4  -3   3    0.14    2.85
   4  -3   4  798.55   30.82
   4  -3   4  885.88   34.04
   4  -3   6 2521.73   95.92
   4  -3   6 2518.00   95.73
  -4   3  -7   10.88    4.67
   4  -3   7    8.50    5.51
   4  -3   7    7.57    5.04
  -4   3  -8  614.09   24.52
   4  -3   8  579.06   23.54
   4  -3   8  556.65   22.42
  -4   3  -9   77.10    6.77
   4  -3   9   58.28    6.58
   4  -3   9   60.38    7.61
  -4   3 -10   -2.19    5.79
   4  -3  10    9.39    7.43
   4  -3  10    2.57    6.35
  -4   3 -11  166.48    9.95
   4  -3  11  146.26    9.34
   4  -3  11  135.19    9.81
  -4   3 -12  509.95   21.48
   4  -3  12  439.02   19.47
   4  -3  12  440.28   18.91
  -4   3 -13  245.03   12.84
   4  -3  13  203.56   11.35
   4  -3  13  184.27   11.72
  -4   3 -14   -9.39    7.33
   4  -3  14    6.44    8.59
   4  -3  14    8.41    7.85
  -4   3 -15   45.20    8.41
   4  -3  15   40.39    8.83
   4  -3  15   42.22    9.01
  -4   2  17   38.71    7.85
  -4   2  17   14.20    7.94
   4  -2 -17   35.68    6.68
  -4   2  16   77.75    9.01
  -4   2  16   79.11    8.55
   4  -2 -16   67.90    7.47
  -4   2  15   99.37    9.71
   4  -2 -15   71.59    8.27
  -4   2  14  513.22   22.23
   4  -2 -14  517.42   21.76
  -4   2  13 1096.95   43.29
   4  -2 -13 1081.54   42.40
   4  -2 -12 1096.02   42.96
  -4   2  11   15.27    8.03
   4  -2 -11   23.68    7.29
  -4   2  10 1252.46   48.99
   4  -2 -10 1201.56   46.75
  -4   2   9  199.22   11.21
   4  -2  -9  199.12   10.65
  -4   2   8  327.97   15.18
   4  -2  -8  342.58   15.88
  -4   2   7  690.67   27.93
   4  -2  -7  665.46   26.95
  -4   2   6   14.29    6.77
   4  -2  -6   20.08    7.33
  -4   2   5  162.37    9.62
   4  -2  -5  163.49    9.39
  -4   2   4    9.01    6.68
   4  -2  -4   -1.68    6.16
  -4   2   3  672.93   26.76
   4  -2  -3  607.08   24.42
  -4   2   2 1229.58   47.26
   4  -2  -2 1053.99   40.63
  -4   2   1   16.58    4.62
   4  -2  -1   12.66    4.34
  -4   2   0  825.63   31.76
   4  -2   0  808.82   31.05
   4  -2   4 1403.77   53.80
   4  -2   4 1370.14   52.54
  -4   2  -5  548.24   21.43
   4  -2   5  461.48   18.31
   4  -2   5  467.92   18.40
  -4   2  -6    7.05    4.48
   4  -2   6    0.61    4.62
   4  -2   6    3.64    4.44
  -4   2  -7  550.11   21.81
   4  -2   7  463.67   18.77
   4  -2   7  503.41   20.31
  -4   2  -8   44.60    5.60
   4  -2   8   25.36    5.46
   4  -2   8   31.85    6.26
  -4   2  -9  228.68   10.97
   4  -2   9  198.24   10.23
   4  -2   9  191.79   10.65
  -4   2 -10   26.71    6.44
   4  -2  10   24.05    6.58
   4  -2  10   23.91    7.33
  -4   2 -11  171.94    9.71
   4  -2  11  167.09   10.09
   4  -2  11  150.56   10.27
  -4   2 -12  168.91   10.27
   4  -2  12  122.82    9.76
   4  -2  12  137.90    9.57
  -4   2 -13  169.05   10.41
   4  -2  13  139.40   10.41
   4  -2  13  139.58   10.04
  -4   2 -14   -3.50    7.24
   4  -2  14   -3.13    7.66
   4  -2  14    9.67    8.50
  -4   2 -15   32.36    8.92
   4  -2  15   33.39    8.55
   4  -2  15   17.79    8.31
  -4   1  18   18.82    8.08
  -4   1  18    5.98    7.29
   4  -1 -18   28.30    6.30
  -4   1  17    8.27    8.17
  -4   1  17   16.95    7.89
   4  -1 -17   13.78    6.86
  -4   1  16   44.78    8.31
  -4   1  16   66.41    8.92
   4  -1 -16   64.35    8.41
  -4   1  15    7.14    8.27
  -4   1  15    6.72    8.36
   4  -1 -15    3.46    7.61
  -4   1  14  918.56   37.03
  -4   1  14  866.73   34.93
   4  -1 -14  854.59   33.95
   4  -1 -13  541.71   22.56
   4  -1 -12  855.52   34.04
  -4   1  11  695.81   28.49
   4  -1 -11  653.32   26.57
  -4   1  10  596.34   24.80
   4  -1 -10  595.41   24.24
  -4   1   9   32.69    8.03
   4  -1  -9   36.33    7.52
  -4   1   8  204.59   11.77
   4  -1  -8  200.15   11.21
  -4   1   7 1124.04   43.94
   4  -1  -7 1083.88   42.31
  -4   1   6 2030.00   77.75
   4  -1  -6 1868.42   71.59
  -4   1   5  270.34   12.94
   4  -1  -5  260.44   12.56
  -4   1   4 1980.49   75.70
   4  -1  -4 1812.38   69.25
  -4   1   2 1921.19   73.13
  -4   1   2 1948.74   74.34
   4  -1  -2 1827.79   69.53
   4  -1  -1  189.32    8.45
  -4   1   0   10.27    2.66
  -4   1   0   16.02    3.18
  -4   1  -3 1040.45   41.09
  -4   1  -4 2102.38   80.18
  -4   1  -5   71.68    5.18
   4  -1   5   62.30    4.81
   4  -1   5   74.48    5.51
  -4   1  -6  179.56    8.78
   4  -1   6  155.13    7.99
   4  -1   6  156.58    8.03
  -4   1  -7   31.05    5.09
   4  -1   7   16.90    5.32
   4  -1   7   25.82    5.60
  -4   1  -8    8.13    5.51
   4  -1   8    8.78    6.21
   4  -1   8    4.81    5.60
  -4   1  -9 1424.31   54.82
   4  -1   9 1273.01   49.41
   4  -1   9 1159.06   44.97
  -4   1 -10  788.28   31.29
   4  -1  10  714.96   29.00
   4  -1  10  675.73   27.27
  -4   1 -11  409.74   17.75
   4  -1  11  345.80   15.64
   4  -1  11  357.39   16.44
  -4   1 -12  346.64   15.83
   4  -1  12  319.14   15.08
   4  -1  12  314.19   15.04
  -4   1 -13  474.46   20.36
   4  -1  13  395.63   17.70
   4  -1  13  399.13   18.12
  -4   1 -14  196.84   11.53
   4  -1  14  174.75   11.49
   4  -1  14  175.54   10.88
  -4   1 -15    4.67    8.73
   4  -1  15   -3.50    8.27
   4  -1  15  -11.39    8.36
   4   0 -18   85.69    7.52
  -4   0  17   85.27    9.29
  -4   0  17   86.21    8.92
   4   0 -17   99.14    7.94
  -4   0  16   19.80    8.87
  -4   0  16    8.08    8.41
   4   0 -16   19.05    7.57
  -4   0  15  609.42   25.82
  -4   0  15  585.14   24.84
   4   0 -15  667.79   27.18
  -4   0  14   98.44    9.90
  -4   0  14   85.55    9.76
   4   0 -14  103.72    8.59
  -4   0  13  451.86   20.27
  -4   0  13  466.47   20.73
   4   0 -13  450.64   19.38
  -4   0  12   51.79    9.25
  -4   0  12   63.14    9.25
   4   0 -12   87.42    8.55
  -4   0  11  160.41   10.88
  -4   0  11  151.72   10.51
   4   0 -11  161.53   10.04
  -4   0  10  665.46   27.51
  -4   0  10  695.81   28.44
   4   0 -10  701.42   28.25
  -4   0   9  203.75   12.05
  -4   0   9  189.50   10.88
   4   0  -9  203.70   11.16
  -4   0   8    1.49    7.80
  -4   0   8   12.09    7.10
   4   0  -8    2.24    7.38
  -4   0   7 1130.58   44.55
  -4   0   7 1124.97   44.08
   4   0  -7 1122.64   43.85
  -4   0   6  362.66   16.11
  -4   0   6  366.31   16.72
   4   0  -6  368.87   16.34
  -4   0   5 3680.80  139.86
  -4   0   5 3748.98  142.29
   4   0  -5 3612.15  137.06
  -4   0   4  320.87   14.43
  -4   0   4  320.49   14.90
   4   0  -4  321.15   14.29
  -4   0   2  780.80   30.35
  -4   0   2  727.10   28.67
   4   0  -2  793.41   30.82
  -4   0   1 3364.18  127.53
   4   0  -1 3227.35  122.44
   4   0   0   49.92    4.62
  -4   0  -1   51.00    4.02
  -4   0  -1   48.61    3.69
   4   0   1   74.39    4.58
  -4   0  -2  617.36   23.96
   4   0   2  731.77   28.30
  -4   0  -3  400.35   15.97
   4   0   3  427.39   17.00
  -4   0  -4    5.42    4.39
   4   0   4   -3.74    4.58
  -4   0  -5  244.37   10.97
   4   0   5  245.82   10.97
  -4   0  -6    6.12    4.67
   4   0   6    2.90    5.23
  -4   0  -7   88.59    6.35
   4   0   7   84.95    6.86
  -4   0  -8  203.61   10.13
   4   0   8  206.60   11.07
  -4   0  -9  309.80   13.68
   4   0   9  326.75   15.18
  -4   0 -10  419.45   17.75
   4   0  10  444.90   19.38
  -4   0 -11   53.47    7.61
   4   0  11   71.68    8.17
   4   0  11   57.11    8.27
  -4   0 -12  133.00    9.81
   4   0  12  131.83    9.48
   4   0  12  115.91    9.99
  -4   0 -13   67.62    8.41
   4   0  13   66.97    9.43
   4   0  13   78.31    8.92
  -4   0 -14    5.65    7.75
   4   0  14    0.33    7.85
   4   0  14    3.97    8.97
  -4  -1  18   48.19    8.27
  -4  -1  18   76.07    8.69
   4   1 -18   57.02    6.96
  -4  -1  17  142.94   10.69
  -4  -1  17  170.31   11.30
   4   1 -17  158.59    9.53
  -4  -1  16   25.17    9.11
  -4  -1  16   49.08    9.06
   4   1 -16   46.19    7.61
  -4  -1  15  122.30   10.41
  -4  -1  15  153.97   10.74
   4   1 -15  137.29    9.62
  -4  -1  14  181.19   11.77
  -4  -1  14  172.27   11.53
   4   1 -14  182.22   10.55
  -4  -1  13   15.08    8.55
  -4  -1  13   24.14    8.50
   4   1 -13   21.39    7.14
  -4  -1  12  480.06   21.11
  -4  -1  12  463.30   20.13
   4   1 -12  497.81   21.57
  -4  -1  11  502.48   21.67
  -4  -1  11  459.75   20.27
   4   1 -11  530.50   22.00
  -4  -1  10  691.61   28.44
  -4  -1  10  689.74   28.21
   4   1 -10  704.68   28.30
  -4  -1   9    8.92    8.27
  -4  -1   9   -3.04    7.10
   4   1  -9    0.75    7.33
  -4  -1   8   35.63    8.22
  -4  -1   8   37.55    7.61
   4   1  -8   30.49    7.14
  -4  -1   7  937.24   37.13
  -4  -1   7  880.27   35.16
   4   1  -7  923.70   36.47
  -4  -1   6 4120.23  156.30
  -4  -1   6 3875.06  147.15
   4   1  -6 4146.85  157.23
  -4  -1   5  936.31   36.89
  -4  -1   5 1035.31   40.86
   4   1  -5  964.80   37.78
  -4  -1   3 1126.84   43.71
  -4  -1   3 1100.22   42.87
   4   1  -3 1072.20   41.47
   4   1  -3 1132.45   44.22
  -4  -1   1  866.26   33.76
  -4  -1   1  910.63   35.26
   4   1  -1  862.99   33.76
  -4  -1   0 1667.61   63.56
  -4  -1   0 1525.65   58.33
   4   1   0 1683.02   64.30
  -4  -1  -1   33.44    5.28
   4   1   1   37.83    5.46
  -4  -1  -2  257.08   11.25
   4   1   2  307.00   13.31
  -4  -1  -3  301.72   12.98
   4   1   3  318.95   13.64
  -4  -1  -4  318.25   13.68
   4   1   4  359.11   15.08
  -4  -1  -5   34.00    6.21
   4   1   5   43.52    6.12
  -4  -1  -6   55.57    6.02
   4   1   6   60.90    6.44
  -4  -1  -7   58.28    6.12
   4   1   7   59.26    6.82
  -4  -1  -8   -2.33    6.16
   4   1   8    3.22    7.10
  -4  -1  -9  369.34   16.30
   4   1   9  383.68   17.23
  -4  -1 -10  131.13    8.78
   4   1  10  123.00    9.48
  -4  -1 -11  542.64   22.65
   4   1  11  490.34   20.97
  -4  -1 -12   29.51    7.33
   4   1  12   28.49    8.08
  -4  -1 -13  265.90   13.31
   4   1  13  268.00   13.78
   4   1  13  221.26   12.05
  -4  -1 -14   30.31    8.78
   4   1  14   36.14    8.59
   4   1  14   26.43    7.75
  -4  -2  18   -6.68    7.66
  -4  -2  18   11.35    7.89
   4   2 -18    8.64    6.30
  -4  -2  17  649.58   26.81
  -4  -2  17  652.85   26.99
   4   2 -17  644.91   26.15
  -4  -2  16   -6.30    8.50
  -4  -2  16    6.44    8.55
   4   2 -16    0.56    7.10
  -4  -2  15   54.12    9.15
  -4  -2  15   45.34    8.73
   4   2 -15   54.82    7.66
  -4  -2  14   66.87    9.53
  -4  -2  14   71.92    8.87
   4   2 -14   71.31    8.08
  -4  -2  13  221.03   12.66
  -4  -2  13  221.26   12.80
   4   2 -13  205.24   11.30
  -4  -2  12    4.44    8.03
  -4  -2  12    4.20    8.08
  -4  -2  11 2017.39   77.61
  -4  -2  11 2091.64   80.46
   4   2 -11 2173.83   83.12
  -4  -2  10  221.03   12.47
  -4  -2  10  226.21   12.05
   4   2 -10  232.70   11.67
  -4  -2   9  422.72   18.40
  -4  -2   9  408.94   18.45
   4   2  -9  410.20   17.70
  -4  -2   8   78.41    7.80
  -4  -2   8   60.94    8.59
   4   2  -8   92.37    8.03
   4   2  -7  639.31   26.01
   4   2  -6  465.45   19.71
   4   2  -6  430.75   19.15
  -4  -2   5 2661.36  101.62
  -4  -2   5 2649.69  100.96
   4   2  -5 2750.56  104.98
   4   2  -5 2605.79   99.23
  -4  -2   4 1588.69   61.32
  -4  -2   4 1550.40   59.73
   4   2  -4 1631.66   63.00
  -4  -2   3 6649.90  251.43
  -4  -2   3 6575.19  248.62
   4   2  -3 6724.62  254.51
  -4  -2   2   43.71    6.44
  -4  -2   2   29.33    7.24
   4   2  -2   41.98    7.66
  -4  -2   1  916.23   35.68
  -4  -2   1  961.99   37.69
   4   2  -1 1070.80   41.70
  -4  -2   0    1.54    6.16
   4   2   0    3.36    6.07
  -4  -2  -1   39.83    6.16
   4   2   1   48.66    6.68
  -4  -2  -2  325.58   14.38
   4   2   2  367.75   15.97
  -4  -2  -3  544.04   22.14
   4   2   3  570.19   23.12
  -4  -2  -4  732.70   29.05
   4   2   4  750.45   29.70
  -4  -2  -5  890.55   34.98
   4   2   5  990.48   38.71
  -4  -2  -6  189.64   10.18
   4   2   6  213.83   11.21
  -4  -2  -7   24.28    6.72
   4   2   7   32.97    7.29
  -4  -2  -8  154.43    9.34
   4   2   8  164.15   10.32
  -4  -2  -9   57.02    7.47
   4   2   9   43.29    7.89
  -4  -2 -10  188.52   11.02
   4   2  10  184.93   10.88
  -4  -2 -11    0.37    7.43
   4   2  11   -1.40    7.99
  -4  -2 -12  557.12   23.35
   4   2  12  536.10   22.88
  -4  -2 -13   21.34    7.85
   4   2  13    9.67    8.55
  -4  -3  18   66.08    8.50
  -4  -3  18   74.58    7.89
   4   3 -18   78.17    7.38
  -4  -3  17   66.03    8.69
  -4  -3  17   65.42    8.59
   4   3 -17   69.30    7.38
  -4  -3  16   53.19    9.01
  -4  -3  16   60.66    9.25
   4   3 -16   47.03    7.89
  -4  -3  15  321.29   16.02
  -4  -3  15  330.02   16.20
   4   3 -15  326.47   15.13
  -4  -3  14  501.54   22.09
  -4  -3  14  497.81   21.86
   4   3 -14  515.55   21.67
  -4  -3  13   16.06    8.50
  -4  -3  13   36.05    8.69
   4   3 -13   24.33    7.52
  -4  -3  12 1862.35   71.82
  -4  -3  12 1771.28   68.37
  -4  -3  11  248.06   13.73
  -4  -3  11  243.63   12.80
   4   3 -11  262.12   12.80
  -4  -3  10  157.14   10.74
  -4  -3  10  143.09   10.09
   4   3 -10  160.88    9.62
  -4  -3   9  497.81   21.34
  -4  -3   9  468.86   20.41
   4   3  -9  529.56   22.00
  -4  -3   8  254.60   13.68
  -4  -3   8  260.11   13.31
   4   3  -8  271.09   14.52
   4   3  -8  302.09   14.10
  -4  -3   7  683.20   28.11
  -4  -3   7  669.19   27.18
   4   3  -7  703.75   29.05
   4   3  -7  625.30   25.64
  -4  -3   6   42.68    7.52
  -4  -3   6   45.34    8.22
   4   3  -6   42.87    8.73
   4   3  -6   43.01    7.14
  -4  -3   5  397.83   17.56
  -4  -3   5  417.35   18.59
   4   3  -5  450.08   20.08
  -4  -3   4 2102.85   80.42
  -4  -3   4 2098.18   80.42
   4   3  -4 2241.54   85.93
  -4  -3   3   12.98    6.63
  -4  -3   3   10.88    7.43
   4   3  -3   17.19    8.22
  -4  -3   2 1380.88   53.24
  -4  -3   2 1404.70   54.36
   4   3  -2 1542.46   59.59
  -4  -3   1   14.29    6.82
   4   3  -1   26.76    7.38
  -4  -3   0  473.99   19.94
   4   3   0  548.71   22.84
  -4  -3  -1  799.48   31.90
   4   3   1  890.08   35.07
  -4  -3  -2  530.03   22.09
   4   3   2  619.23   25.31
  -4  -3  -3 1479.42   57.11
   4   3   3 1667.61   64.16
  -4  -3  -4  709.82   28.58
   4   3   4  810.69   32.32
  -4  -3  -5 2821.07  107.45
   4   3   5 3021.88  115.11
  -4  -3  -6  635.10   25.92
   4   3   6  665.46   27.27
  -4  -3  -7   -5.74    7.47
   4   3   7    8.17    7.19
  -4  -3  -8  294.81   14.24
   4   3   8  316.80   15.18
  -4  -3  -9  314.56   14.99
   4   3   9  324.46   15.78
  -4  -3 -10   12.70    7.71
   4   3  10   -3.46    8.08
  -4  -3 -11   22.51    7.89
   4   3  11   28.77    7.85
  -4  -3 -12   39.23    8.41
   4   3  12   47.63    9.01
  -4  -4  18  132.20    9.71
  -4  -4  18  100.54    9.20
   4   4 -18  119.60    8.22
  -4  -4  17  123.66   10.09
  -4  -4  17  101.71    9.25
   4   4 -17  122.12    8.41
  -4  -4  16  123.10   10.32
  -4  -4  16   97.27    9.53
   4   4 -16  111.52    8.64
  -4  -4  15   66.73    9.29
  -4  -4  15   60.85    8.97
   4   4 -15   85.74    8.22
  -4  -4  14   23.07    8.59
  -4  -4  14   22.65    8.87
   4   4 -14   21.76    6.91
  -4  -4  13 1237.52   48.61
  -4  -4  13 1189.88   46.98
   4   4 -13 1307.10   50.81
  -4  -4  12   15.88    7.29
  -4  -4  12    8.64    8.17
  -4  -4  11 1321.11   51.51
  -4  -4  11 1350.53   52.86
   4   4 -11 1363.60   52.91
  -4  -4  10   37.17    8.78
  -4  -4  10   51.93    8.41
   4   4 -10   51.88    7.24
   4   4 -10   41.24    8.78
  -4  -4   9   92.98    9.71
  -4  -4   9   63.32    8.36
   4   4  -9   98.67    9.81
   4   4  -9   71.54    7.75
  -4  -4   8   13.26    7.29
  -4  -4   8   16.58    8.50
   4   4  -8   -2.43    8.41
  -4  -4   7 1503.70   58.42
  -4  -4   7 1533.12   59.31
   4   4  -7 1556.47   60.52
  -4  -4   6  134.35   10.32
  -4  -4   6  102.88    8.92
   4   4  -6  125.90   10.55
  -4  -4   5  478.66   20.69
  -4  -4   5  466.47   19.99
   4   4  -5  542.17   23.54
   4   4  -4   43.99    8.83
  -4  -4   3 1985.16   76.26
  -4  -4   3 2067.35   79.11
   4   4  -3 2226.60   85.41
  -4  -4   2 3655.11  138.93
   4   4  -2 4284.61  162.79
  -4  -4   1  871.40   34.56
   4   4  -1 1053.06   41.52
  -4  -4   0  374.10   16.86
   4   4   0  461.24   19.94
  -4  -4  -1  505.28   21.43
   4   4   1  569.72   23.58
  -4  -4  -2 1539.66   59.59
   4   4   2 1723.65   66.45
  -4  -4  -3  972.27   38.48
   4   4   3 1097.89   43.20
  -4  -4  -4 2262.09   86.63
   4   4   4 2415.26   92.42
  -4  -4  -5  295.65   14.57
   4   4   5  330.86   15.69
  -4  -4  -6 1079.21   42.68
   4   4   6 1128.71   44.41
  -4  -4  -7    1.03    7.66
   4   4   7   11.44    8.55
  -4  -4  -8  351.50   16.44
   4   4   8  388.02   17.93
  -4  -4  -9  240.41   12.56
   4   4   9  248.76   13.22
  -4  -4 -10  173.07   10.93
   4   4  10  184.83   11.30
  -4  -4 -11    9.62    8.41
   4   4  11   19.71    8.22
  -4  -4 -12   48.10    8.97
   4   4  12   21.29    8.73
  -4  -5  18  206.03   11.95
  -4  -5  18  229.43   12.05
   4   5 -18  230.79   11.44
  -4  -5  17    1.73    8.08
  -4  -5  17    4.90    7.71
   4   5 -17    7.14    6.30
  -4  -5  16    5.42    8.55
  -4  -5  16   -5.23    8.59
   4   5 -16   -6.40    6.91
  -4  -5  15  569.72   24.00
  -4  -5  15  580.47   24.75
   4   5 -15  588.40   24.33
  -4  -5  14  973.67   39.04
  -4  -5  14  977.41   38.81
   4   5 -14  975.07   38.43
  -4  -5  13   -6.77    8.41
  -4  -5  13   15.64   10.32
   4   5 -13    4.53    6.96
  -4  -5  12   29.61    7.61
  -4  -5  12   18.26    9.11
   4   5 -12   27.13    7.71
  -4  -5  11   29.05    7.89
  -4  -5  11   20.59    8.73
   4   5 -11   39.51    9.15
  -4  -5  10  287.85   14.38
  -4  -5  10  284.54   14.99
   4   5 -10  266.00   14.71
  -4  -5   9  163.91   11.44
  -4  -5   9  186.47   11.35
   4   5  -9  173.53   11.81
  -4  -5   8  390.59   17.70
  -4  -5   8  353.28   17.14
   4   5  -8  358.60   17.28
  -4  -5   7  759.79   31.05
  -4  -5   7  721.03   29.33
   4   5  -7  790.14   32.18
  -4  -5   6  134.87    9.76
  -4  -5   6  118.94   10.13
   4   5  -6  123.66   10.04
  -4  -5   5  416.60   18.54
  -4  -5   5  399.51   18.31
   4   5  -5  434.21   19.61
  -4  -5   4 1655.00   63.84
  -4  -5   4 1671.35   64.68
   4   5  -4 1919.79   74.06
  -4  -5   3  997.02   39.79
  -4  -5   3 1131.04   44.22
   4   5  -3 1110.50   43.90
  -4  -5   2  568.32   23.96
   4   5  -2  676.20   27.83
  -4  -5   1 2522.20   96.53
   4   5  -1 2873.84  109.84
  -4  -5   0 1767.08   68.18
   4   5   0 1853.01   71.50
  -4  -5  -1  241.71   13.12
   4   5   1  276.88   14.20
  -4  -5  -2   -4.72    8.45
   4   5   2   -4.95    7.66
  -4  -5  -3  489.40   21.29
   4   5   3  575.80   24.24
  -4  -5  -4  156.39   10.46
   4   5   4  187.36   11.81
  -4  -5  -5  621.09   26.01
   4   5   5  612.69   25.73
  -4  -5  -6   17.37    8.41
   4   5   6   14.57    8.50
  -4  -5  -7   24.14    8.41
   4   5   7   45.02    9.01
  -4  -5  -8  155.65   10.93
   4   5   8  155.55   10.74
  -4  -5  -9   47.26    7.85
   4   5   9   53.80    9.15
  -4  -5 -10   -1.45    8.36
   4   5  10    1.31    8.31
  -4  -5 -11    7.43    8.78
   4   5  11   -0.05    8.17
  -4  -6  17  221.59   12.00
  -4  -6  17  225.98   12.70
   4   6 -17  175.40    9.81
  -4  -6  16   17.28    8.08
  -4  -6  16   -1.59    8.41
  -4  -6  15   51.56    8.41
  -4  -6  15   52.68    9.25
  -4  -6  14  336.98   15.74
  -4  -6  14  376.58   17.65
  -4  -6  13   55.38    9.48
  -4  -6  12   97.13    9.06
  -4  -6  12  113.80   10.18
   4   6 -12  100.64   10.27
  -4  -6  11   43.94    7.89
  -4  -6  11   33.58    9.01
   4   6 -11   37.17    9.06
  -4  -6  10  166.67   10.27
  -4  -6  10  187.40   12.14
   4   6 -10  173.07   11.95
  -4  -6   9   34.84    7.80
  -4  -6   9   23.72    8.92
   4   6  -9   33.20    9.34
  -4  -6   8    1.35    7.94
  -4  -6   8   -2.24    8.69
   4   6  -8    8.73    9.01
  -4  -6   7   30.21    9.20
  -4  -6   7   24.80    7.99
   4   6  -7   15.74    8.92
  -4  -6   6   25.68    7.75
  -4  -6   6   19.33    8.83
   4   6  -6   22.46    8.92
  -4  -6   5  393.16   18.45
  -4  -6   5  400.96   17.93
   4   6  -5  390.64   18.49
  -4  -6   4 1361.27   53.00
  -4  -6   4 1417.31   55.48
   4   6  -4 1565.34   60.94
  -4  -6   3 1065.67   42.54
   4   6  -3 1166.07   46.04
  -4  -6   2 4120.70  156.77
   4   6  -2 4335.98  164.89
  -4  -6   1 2281.70   87.65
   4   6  -1 2454.49   94.14
  -4  -6   0   24.66    8.27
   4   6   0   28.53    8.27
  -4  -6  -1 1717.11   66.55
   4   6   1 1701.70   65.94
  -4  -6  -2  688.81   28.39
   4   6   2  711.22   29.47
  -4  -6  -3   38.53    8.13
   4   6   3   58.37    8.87
  -4  -6  -4   36.75    8.50
   4   6   4   53.70    9.01
  -4  -6  -5   10.55    8.69
   4   6   5   13.59    8.59
  -4  -6  -6  749.98   30.87
   4   6   6  714.96   29.51
  -4  -6  -7   21.86    8.87
   4   6   7   22.23    8.50
  -4  -6  -8  244.14   13.45
   4   6   8  234.38   13.08
  -4  -6  -9    7.33    8.36
   4   6   9   34.42    8.87
  -4  -6 -10   39.83    8.36
   4   6  10   55.29    8.92
  -4  -7  17   41.80    7.14
  -4  -7  17   42.78    8.45
  -4  -7  16  122.72    8.73
  -4  -7  16  142.15   10.51
  -4  -7  15   29.19    6.91
  -4  -7  15   40.49    8.55
  -4  -7  14   25.31    7.75
  -4  -7  14   24.94    8.78
   4   7 -13  222.47   13.08
  -4  -7  12  122.26   10.32
  -4  -7  12  110.49    9.39
   4   7 -12  108.25   10.46
  -4  -7  11   35.82    7.75
  -4  -7  11   26.52    8.78
   4   7 -11   37.08    9.53
  -4  -7  10  933.98   37.55
  -4  -7  10  946.58   37.64
   4   7 -10  897.08   36.33
  -4  -7   9  183.81   11.16
  -4  -7   9  165.59   11.58
   4   7  -9  145.65   11.63
  -4  -7   8    0.84    7.71
  -4  -7   8    8.78    8.73
   4   7  -8   12.52    9.11
  -4  -7   7   13.54    9.48
  -4  -7   7    4.53    7.66
   4   7  -7    2.57    9.06
  -4  -7   6  283.74   15.04
  -4  -7   6  300.88   14.94
   4   7  -6  307.00   15.92
  -4  -7   5  115.35   10.13
  -4  -7   5  123.10    9.90
   4   7  -5  154.34   11.49
  -4  -7   4  296.30   15.32
  -4  -7   4  321.89   15.22
   4   7  -4  318.11   16.02
  -4  -7   3  734.57   30.35
   4   7  -3  853.19   34.79
  -4  -7   2  128.05   10.93
   4   7  -2  135.52   10.69
  -4  -7   1  681.34   28.53
   4   7  -1  712.62   29.65
  -4  -7   0   47.82    9.43
   4   7   0   51.79    9.01
  -4  -7  -1  166.20   11.44
   4   7   1  173.30   11.91
  -4  -7  -2  298.41   15.22
   4   7   2  299.20   15.46
  -4  -7  -3  708.89   29.56
   4   7   3  778.94   32.08
  -4  -7  -4   20.83    8.97
   4   7   4   14.29    8.69
  -4  -7  -5  821.90   33.72
   4   7   5  925.57   37.45
  -4  -7  -6  102.32   10.18
   4   7   6  112.03   10.27
  -4  -7  -7  238.49   13.22
   4   7   7  255.12   13.96
  -4  -7  -8  329.04   16.16
   4   7   8  331.56   15.97
  -4  -8  16    9.71    7.89
  -4  -8  16    4.06    5.98
  -4  -8  15   33.39    8.08
  -4  -8  15   23.58    6.07
  -4  -8  14   10.51    7.99
  -4  -8  14    3.69    7.14
   4   8 -14    4.11    8.13
   4   8 -13   77.66    9.90
  -4  -8  12  229.20   13.17
  -4  -8  12  247.08   12.89
   4   8 -12  231.86   13.45
  -4  -8  11  532.83   22.88
  -4  -8  11  492.21   21.20
   4   8 -11  469.79   21.06
  -4  -8  10    9.99    7.38
  -4  -8  10    7.24    8.69
   4   8 -10    7.94    9.25
  -4  -8   9  126.23    9.90
  -4  -8   9  116.47   10.37
   4   8  -9  108.15   10.83
  -4  -8   8   13.45    9.25
  -4  -8   8   -8.45    7.94
   4   8  -8    1.87    9.43
  -4  -8   7  114.41   10.27
  -4  -8   7  129.92    9.76
   4   8  -7  125.15   11.25
  -4  -8   6    2.62    8.64
  -4  -8   6   -5.46    7.80
   4   8  -6   -0.79    9.29
   4   8  -5  740.64   30.68
  -4  -8   4  404.32   19.15
  -4  -8   4  456.20   20.13
   4   8  -4  460.17   20.87
  -4  -8   3  272.21   14.80
   4   8  -3  284.77   15.32
  -4  -8   2  212.11   12.94
   4   8  -2  211.97   12.75
  -4  -8   1   29.51    9.76
   4   8  -1   39.74    9.57
  -4  -8   0  192.26   12.84
   4   8   0  205.94   12.75
  -4  -8  -1  101.48   10.41
   4   8   1  113.01   10.37
  -4  -8  -2  531.90   23.44
   4   8   2  621.09   26.52
  -4  -8  -3  167.84   12.19
   4   8   3  203.28   13.03
  -4  -8  -4  619.23   26.43
   4   8   4  707.95   29.42
  -4  -8  -5   43.29    9.34
   4   8   5   42.96    9.29
  -4  -8  -6  917.63   36.85
   4   8   6 1061.93   42.08
  -4  -8  -7    7.66    8.78
   4   8   7    3.22    8.78
  -4  -9  15    8.97    5.65
  -4  -9  15   17.05    8.08
   4   9 -15   14.29    7.71
  -4  -9  14   16.02    6.40
  -4  -9  14   23.44    8.03
   4   9 -14   10.93    7.80
  -4  -9  13  169.10   11.30
  -4  -9  12  149.34    9.29
  -4  -9  12  138.28   10.32
   4   9 -12  135.33   10.60
  -4  -9  11  380.36   16.95
  -4  -9  11  384.24   18.12
   4   9 -11  375.18   17.89
  -4  -9  10   88.96    9.76
  -4  -9  10   86.95    8.36
   4   9 -10   93.35   10.37
  -4  -9   9  247.13   13.22
  -4  -9   9  237.23   13.68
   4   9  -9  256.75   14.66
  -4  -9   8   20.73    8.13
  -4  -9   8    8.97    9.01
   4   9  -8   19.99    9.76
  -4  -9   7   11.95    8.50
  -4  -9   7   21.48    8.13
   4   9  -7   22.79    9.62
  -4  -9   6   22.88    7.85
  -4  -9   6   -3.97    9.67
   4   9  -6    6.86    9.48
  -4  -9   5   98.35   10.79
  -4  -9   5  113.52    9.25
   4   9  -5  104.79   10.69
  -4  -9   4  107.55   10.93
   4   9  -4  108.01   10.27
  -4  -9   3  320.17   16.58
   4   9  -3  336.23   17.28
  -4  -9   2   44.69    9.48
   4   9  -2   67.67    9.90
  -4  -9   1  636.04   27.32
   4   9  -1  638.37   27.18
  -4  -9   0   43.99   10.41
   4   9   0   39.23    9.48
  -4  -9  -1  286.54   15.69
   4   9   1  300.09   15.92
  -4  -9  -2    3.74    8.50
   4   9   2   13.92    9.01
  -4  -9  -3  458.49   20.87
   4   9   3  548.71   23.72
  -4  -9  -4   56.79    9.29
   4   9   4   86.49    9.57
  -4  -9  -5  236.72   13.59
   4   9   5  278.32   14.76
  -4 -10  13   20.13    6.30
  -4 -10  13   13.68    8.03
  -4 -10  12  192.63   10.32
  -4 -10  12  191.28   11.11
   4  10 -12  189.27   11.11
  -4 -10  11   54.22    7.29
  -4 -10  11   53.66    8.69
   4  10 -11   52.82    8.59
  -4 -10  10  302.84   14.15
  -4 -10  10  285.14   14.43
   4  10 -10  315.08   15.83
  -4 -10   9   15.69    8.92
  -4 -10   9    2.71    7.00
   4  10  -9   15.55    9.25
  -4 -10   8   68.04   10.09
  -4 -10   8   62.16    8.13
   4  10  -8   59.87   10.09
  -4 -10   7   59.40   10.13
  -4 -10   7   36.80    7.75
   4  10  -7   53.61   10.32
  -4 -10   6    7.57    7.38
  -4 -10   6  -14.15    8.87
   4  10  -6    1.77    9.48
  -4 -10   5   14.66    7.71
  -4 -10   5    4.25    9.99
   4  10  -5   10.79    9.11
  -4 -10   4   49.50   10.51
   4  10  -4   45.30    9.43
  -4 -10   3   -1.96    8.97
   4  10  -3   -5.14    8.78
  -4 -10   2  328.34   17.05
   4  10  -2  359.95   17.47
  -4 -10   1    3.22    9.81
   4  10  -1   11.11    9.15
  -4 -10   0  488.94   22.09
   4  10   0  488.47   22.09
  -4 -10  -1    6.96    8.92
   4  10   1    6.68    9.48
  -4 -10  -2   75.89    9.85
   4  10   2   71.54    9.57
  -4 -10  -3   79.71    9.20
   4  10   3   99.66    9.99
  -4 -11  11  108.85    8.78
  -4 -11  11  117.68    8.03
   4  11 -11  126.83    9.39
  -4 -11  10   42.31    6.86
  -4 -11  10   40.16    8.45
   4  11 -10   45.34    8.13
  -4 -11   9   43.99    7.29
  -4 -11   9   45.11    8.17
   4  11  -9   47.82    8.69
  -4 -11   8   13.87    7.10
  -4 -11   8   15.78    8.22
   4  11  -8   28.58    8.69
  -4 -11   7   70.80    9.11
  -4 -11   7   93.26    8.08
   4  11  -7   79.81    9.76
  -4 -11   6   85.32    7.99
  -4 -11   6   76.07    9.57
   4  11  -6   76.63    9.71
  -4 -11   5  282.29   15.32
  -4 -11   5  292.61   13.82
   4  11  -5  299.81   15.36
  -4 -11   4   -2.33    6.77
  -4 -11   4   11.58    8.83
   4  11  -4    1.26    8.83
  -4 -11   3  307.65   16.20
   4  11  -3  347.58   17.23
  -4 -11   2   43.06    9.90
   4  11  -2   50.85    9.11
  -4 -11   1  453.77   20.45
   4  11  -1  466.75   20.87
  -4 -11   0   13.59    9.34
   4  11   0   30.54    8.92
  -5  13   3   73.50    9.11
   5 -13  -3   65.33    8.22
  -5  13   2  162.18   10.74
   5 -13  -2  168.02   10.65
  -5  13   1   75.84    9.67
   5 -13  -1   75.04    9.06
  -5  13   0    6.49    7.71
   5 -13   0   25.92    9.34
  -5  13  -1  226.72   12.66
   5 -13   1  237.51   13.50
  -5  13  -2   49.92    8.45
   5 -13   2   70.70    9.57
  -5  13  -3  425.66   19.33
   5 -13   3  446.58   20.08
  -5  13  -4   39.04    9.34
   5 -13   4   48.71    9.53
  -5  13  -5   91.58    9.57
   5 -13   5  103.39   10.32
  -5  13  -6    0.05    8.69
   5 -13   6   -7.61    8.31
   5 -13   6    0.00    7.89
  -5  13  -7   77.24   10.09
   5 -13   7   99.75    9.67
   5 -13   7  103.48    9.34
  -5  12   6   32.04    7.94
   5 -12  -6   16.20    7.38
  -5  12   5   24.14    7.89
   5 -12  -5   26.81    7.61
  -5  12   4   94.99    9.67
   5 -12  -4  111.98    9.34
  -5  12   3  234.66   13.64
   5 -12  -3  213.18   12.05
  -5  12   2  160.83   10.69
   5 -12  -2  158.45   10.65
  -5  12   1   -0.75    7.71
   5 -12  -1   15.92    8.45
  -5  12   0  492.67   21.57
   5 -12   0  514.15   22.37
  -5  12  -1  276.60   14.20
   5 -12   1  301.39   15.18
  -5  12  -2  178.44   11.25
   5 -12   2  154.01   10.65
  -5  12  -3   21.15    8.50
   5 -12   3   34.32    8.36
  -5  12  -4  118.19    9.76
   5 -12   4  130.52    9.95
  -5  12  -5  173.77   11.35
   5 -12   5  220.37   12.75
  -5  12  -6  169.05   12.33
   5 -12   6  208.84   12.61
   5 -12   6  198.94   11.30
  -5  12  -7   41.05    9.39
   5 -12   7   53.28    8.59
   5 -12   7   59.03    7.80
  -5  12  -8   92.42   10.18
   5 -12   8  119.22    9.62
   5 -12   8  127.16   10.27
  -5  12  -9  192.49   12.24
   5 -12   9  265.25   13.59
   5 -12   9  258.62   13.82
  -5  11   8   -8.45    7.38
   5 -11  -8    5.32    7.10
  -5  11   7  327.03   15.27
   5 -11  -7  335.20   15.55
  -5  11   6   25.78    8.36
   5 -11  -6   19.29    7.85
  -5  11   5  256.89   13.68
   5 -11  -5  306.81   14.90
  -5  11   4   11.21    7.99
   5 -11  -4    1.68    7.94
  -5  11   3  661.25   27.51
   5 -11  -3  835.44   33.67
  -5  11   2  296.96   15.64
   5 -11  -2  322.64   16.06
  -5  11   1  108.81    9.85
   5 -11  -1  126.46   10.88
  -5  11   0  240.03   13.22
   5 -11   0  200.43   12.52
  -5  11  -1 1220.24   48.15
   5 -11   1 1187.08   46.75
  -5  11  -2   74.25    9.76
   5 -11   2   73.97    9.71
  -5  11  -3  188.71   12.00
   5 -11   3  200.66   12.24
  -5  11  -4    7.71    8.59
   5 -11   4   15.13    7.80
  -5  11  -5  144.91   10.60
   5 -11   5  183.29   11.21
  -5  11  -6   -1.35    9.57
   5 -11   6    0.37    7.80
   5 -11   6   -0.28    8.31
  -5  11  -7    1.54    9.53
   5 -11   7   15.88    8.55
   5 -11   7   27.74    8.22
  -5  11  -8  181.89   11.95
   5 -11   8  197.16   11.81
   5 -11   8  203.33   11.63
  -5  11  -9   14.52    9.06
   5 -11   9    6.12    7.94
   5 -11   9    8.27    7.75
  -5  11 -10  418.28   19.10
   5 -11  10  528.63   22.46
   5 -11  10  586.54   24.47
  -5  11 -11   87.93    9.71
   5 -11  11  101.29    9.39
   5 -11  11  115.11    9.76
  -5  10  10  113.38    8.55
   5 -10 -10   95.22    8.08
  -5  10   9   21.06    7.66
   5 -10  -9   15.50    6.54
  -5  10   8  273.56   13.82
   5 -10  -8  251.19   13.12
  -5  10   7   10.13    8.03
   5 -10  -7   14.34    7.89
  -5  10   6  248.11   13.36
   5 -10  -6  283.65   14.80
  -5  10   5   79.06    9.25
   5 -10  -5   97.97    9.29
  -5  10   4  348.61   16.58
   5 -10  -4  403.66   18.45
  -5  10   3   78.36    9.01
   5 -10  -3   69.53    9.53
  -5  10   2   42.78    8.64
   5 -10  -2   43.43    9.39
  -5  10   1  933.51   38.20
   5 -10  -1  771.46   31.57
  -5  10   0   56.46    9.57
   5 -10   0   51.79    9.29
  -5  10  -1  792.48   32.36
   5 -10   1  743.44   30.49
  -5  10  -2  410.62   18.87
   5 -10   2  420.99   19.15
  -5  10  -3    1.26    8.13
   5 -10   3    8.83    8.22
  -5  10  -4  136.64    9.81
   5 -10   4  161.86   11.11
  -5  10  -5  107.13    9.43
   5 -10   5  143.69   10.32
  -5  10  -6   81.58    9.34
   5 -10   6   96.95    9.76
   5 -10   6   91.67    9.20
  -5  10  -7   94.19    9.85
   5 -10   7   98.63    9.34
   5 -10   7   93.16    9.39
  -5  10  -8   41.66    9.15
   5 -10   8   24.19    8.50
   5 -10   8   41.09    8.27
  -5  10  -9  586.54   25.08
   5 -10   9  679.47   27.79
   5 -10   9  640.71   26.48
  -5  10 -10   -5.60    8.87
   5 -10  10   -8.17    8.17
   5 -10  10    7.75    8.03
  -5  10 -11  232.19   13.12
   5 -10  11  263.57   13.87
   5 -10  11  293.13   14.85
   5 -10  12   23.44    8.45
   5 -10  12   20.97    8.69
  -5   9  11   69.49    8.03
   5  -9 -11   61.22    7.24
  -5   9  10  179.93   10.83
   5  -9 -10  173.72   10.27
  -5   9   9  343.80   15.97
   5  -9  -9  355.52   16.11
  -5   9   8   23.86    8.41
   5  -9  -8   14.15    8.03
  -5   9   7  663.59   27.41
   5  -9  -7  674.33   27.79
  -5   9   6  100.78    9.20
   5  -9  -6  108.57    9.57
  -5   9   5 1241.25   48.71
   5  -9  -5 1368.74   53.38
  -5   9   4  976.00   38.95
   5  -9  -4 1039.98   41.24
  -5   9   3 1255.73   49.27
   5  -9  -3 1415.44   55.34
  -5   9   2  107.13    9.48
   5  -9  -2  109.70    9.81
  -5   9   1  152.61   10.74
   5  -9  -1  147.24   10.65
  -5   9   0  359.35   17.09
   5  -9   0  317.65   15.78
  -5   9  -1  118.71   10.27
   5  -9   1  122.07    9.81
  -5   9  -2  998.89   39.83
   5  -9   2 1027.37   40.58
  -5   9  -3  113.01    9.39
   5  -9   3  123.10    9.67
  -5   9  -4    7.57    7.89
   5  -9   4   14.20    7.89
  -5   9  -5  348.98   16.34
   5  -9   5  381.39   17.28
   5  -9   5  395.17   17.70
  -5   9  -6   65.38    8.78
   5  -9   6   60.52    7.89
   5  -9   6   68.23    8.87
  -5   9  -7    0.33    8.45
   5  -9   7   -4.76    7.85
   5  -9   7   11.16    8.13
  -5   9  -8  835.44   33.67
   5  -9   8  937.24   37.27
   5  -9   8  931.64   36.80
  -5   9  -9   96.67    9.43
   5  -9   9  141.36    9.85
   5  -9   9  129.45    9.39
  -5   9 -10  574.39   24.42
   5  -9  10  644.44   26.48
   5  -9  10  716.36   29.37
   5  -9  11   -5.18    7.61
   5  -9  11   16.16    8.31
   5  -9  12  146.45   10.18
   5  -9  12  144.49   11.30
   5  -9  13   13.96    8.45
   5  -9  13    0.14    9.01
  -5   8  12  155.23    9.85
   5  -8 -12  158.12    9.43
  -5   8  11   22.18    7.47
   5  -8 -11    5.84    7.38
  -5   8  10  208.18   12.00
   5  -8 -10  193.15   11.11
  -5   8   9  349.68   16.48
   5  -8  -9  311.48   15.13
  -5   8   8  304.71   15.04
   5  -8  -8  270.90   13.92
  -5   8   7    8.08    7.61
   5  -8  -7   10.88    7.99
  -5   8   6  933.04   37.27
   5  -8  -6  972.27   38.67
  -5   8   5  169.84   11.07
   5  -8  -5  155.55   10.60
  -5   8   4 1271.61   49.87
   5  -8  -4 1260.40   49.36
  -5   8   3  773.80   31.29
   5  -8  -3  829.37   33.58
  -5   8   2  203.79   11.63
   5  -8  -2  204.07   12.05
  -5   8   1    5.18    7.38
   5  -8  -1    8.64    7.94
  -5   8   0  159.43   11.53
   5  -8   0  120.30    9.81
  -5   8  -1  218.41   12.00
   5  -8   1  215.65   11.77
  -5   8  -2   17.75    7.33
   5  -8   2   17.51    7.14
  -5   8  -3  769.60   31.15
   5  -8   3  870.00   34.65
  -5   8  -4   -1.40    7.24
   5  -8   4   13.54    6.91
  -5   8  -5  695.81   28.63
   5  -8   5  667.33   27.09
   5  -8   5  665.92   27.46
  -5   8  -6   39.79    8.03
   5  -8   6   29.84    6.82
   5  -8   6   50.57    8.17
  -5   8  -7 1354.26   52.77
   5  -8   7 1522.38   58.98
   5  -8   7 1445.79   55.95
  -5   8  -8   15.55    7.66
   5  -8   8   31.90    7.61
   5  -8   8   31.24    8.17
  -5   8  -9  436.12   19.19
   5  -8   9  557.12   23.72
   5  -8   9  558.52   23.12
   5  -8  10    6.40    7.75
   5  -8  10   11.86    7.10
   5  -8  11 1421.51   55.29
   5  -8  11 1410.30   54.68
   5  -8  12   -2.57    9.25
   5  -8  12   15.32    7.85
   5  -8  13   92.42    9.67
   5  -8  13  107.17    9.20
  -5   7  13  267.72   13.03
   5  -7 -13  283.09   13.26
  -5   7  12  121.00    9.20
   5  -7 -12  117.17    8.92
  -5   7  11  460.78   20.36
   5  -7 -11  454.94   19.71
  -5   7  10    8.08    7.71
   5  -7 -10   15.64    7.61
  -5   7   9    0.65    7.75
   5  -7  -9    9.90    7.61
  -5   7   8  100.96    9.11
   5  -7  -8   92.88    9.43
  -5   7   7  456.29   19.99
   5  -7  -7  463.91   20.17
  -5   7   6  362.99   16.86
   5  -7  -6  351.88   16.34
  -5   7   5   17.98    7.75
   5  -7  -5   19.47    8.31
  -5   7   4  370.83   17.05
   5  -7  -4  344.36   16.39
  -5   7   3   26.01    7.71
   5  -7  -3   23.91    7.75
  -5   7   2  584.20   24.19
   5  -7  -2  568.32   23.68
  -5   7   1  356.83   16.39
   5  -7  -1  364.58   16.58
  -5   7   0 1040.45   40.95
   5  -7   0 1057.73   41.38
  -5   7  -1   -2.33    6.63
   5  -7   1    5.56    6.96
  -5   7  -2 1318.77   51.14
   5  -7   2 1336.05   51.74
  -5   7  -3   62.11    7.47
   5  -7   3   55.38    6.91
  -5   7  -4  224.62   11.53
   5  -7   4  243.07   11.86
  -5   7  -5   20.78    7.05
   5  -7   5   13.73    6.86
   5  -7   5   15.22    6.82
  -5   7  -6   10.74    7.05
   5  -7   6   -1.73    6.68
   5  -7   6    7.43    7.00
  -5   7  -7    3.41    7.00
   5  -7   7   -3.74    6.86
   5  -7   7   -7.75    6.82
  -5   7  -8  418.65   18.26
   5  -7   8  491.74   20.45
   5  -7   8  541.24   22.56
   5  -7   9   34.46    7.61
   5  -7   9   47.31    7.33
   5  -7  10  392.22   17.98
   5  -7  10  393.67   17.14
   5  -7  11  237.70   12.05
   5  -7  11  232.56   13.22
   5  -7  12  695.34   28.02
   5  -7  12  685.54   28.21
   5  -7  13  117.03    9.11
   5  -7  13  150.84   11.07
   5  -7  14    1.17    8.08
   5  -7  14    8.41    8.59
  -5   6  14  864.86   34.42
  -5   6  13   33.62    7.99
   5  -6 -13   33.81    7.19
  -5   6  12  388.44   17.89
   5  -6 -12  406.09   17.93
  -5   6  11  594.01   25.08
   5  -6 -11  614.09   25.50
  -5   6  10   -2.29    8.45
   5  -6 -10    4.44    7.80
  -5   6   9   51.79    8.83
   5  -6  -9   56.65    8.13
  -5   6   8   33.25    8.27
   5  -6  -8   38.34    7.66
  -5   6   7  587.94   24.98
   5  -6  -7  537.97   22.79
  -5   6   6   18.77    7.24
   5  -6  -6    9.34    7.99
  -5   6   5 1367.34   53.14
   5  -6  -5 1357.53   52.77
  -5   6   4  226.63   11.67
   5  -6  -4  217.66   11.67
  -5   6   3 1143.65   44.60
   5  -6  -3 1066.13   41.66
  -5   6   2  152.94    9.43
   5  -6  -2  128.47    8.64
  -5   6   1  334.92   15.18
   5  -6  -1  321.71   14.24
  -5   6   0   61.27    7.29
   5  -6   0   50.62    6.07
  -5   6  -1 1370.14   52.91
   5  -6   1 1296.36   49.87
  -5   6  -2 1136.65   44.13
   5  -6   2 1122.17   43.43
  -5   6  -3 1191.29   46.04
   5  -6   3 1206.70   46.56
  -5   6  -4   19.71    6.26
   5  -6   4   18.26    5.93
   5  -6   4   27.37    5.74
  -5   6  -5   66.08    6.68
   5  -6   5   47.73    6.02
   5  -6   5   62.95    6.49
  -5   6  -6 2225.20   84.95
   5  -6   6 2562.36   97.55
   5  -6   6 2751.02  104.75
  -5   6  -7 1695.63   65.05
   5  -6   7 1933.80   73.97
   5  -6   7 2012.25   77.05
   5  -6   8  -11.67    7.05
   5  -6   8    2.90    5.98
   5  -6   9   95.78    7.52
   5  -6   9   92.84    8.59
   5  -6  10  778.47   30.96
   5  -6  10  771.93   31.19
   5  -6  11  705.15   28.25
   5  -6  11  729.90   29.84
   5  -6  12  290.47   13.68
   5  -6  12  286.03   14.80
   5  -6  14   17.14    8.50
   5  -6  14   -0.51    7.75
  -5   5  15  479.60   20.27
   5  -5 -15  453.54   19.05
  -5   5  14  254.70   13.17
   5  -5 -14  272.16   12.98
  -5   5  13  174.05   10.88
   5  -5 -13  184.55   10.60
  -5   5  12  588.87   24.89
   5  -5 -12  586.07   24.47
  -5   5  11  602.88   25.50
   5  -5 -11  619.69   25.82
  -5   5  10  704.22   29.00
   5  -5 -10  677.60   27.79
  -5   5   9  188.52   11.63
   5  -5  -9  173.11   10.93
  -5   5   8  428.79   19.24
   5  -5  -8  399.74   17.65
  -5   5   7 1347.73   52.54
   5  -5  -7 1276.28   49.64
  -5   5   6  871.40   34.98
   5  -5  -6  778.94   31.15
  -5   5   5  505.28   21.43
   5  -5  -5  465.35   19.71
  -5   5   4  916.23   36.28
   5  -5  -4  841.98   33.34
  -5   5   3  942.85   37.27
   5  -5  -3  854.12   33.58
  -5   5   2   48.75    7.14
   5  -5  -2   56.93    7.14
  -5   5   1   28.53    6.30
   5  -5  -1   24.98    5.51
  -5   5   0   40.30    6.44
   5  -5   0   42.92    5.74
  -5   5  -1  625.30   25.03
   5  -5   1  688.81   27.04
  -5   5  -2  542.17   21.81
   5  -5   2  566.46   22.37
  -5   5  -3  246.06   11.16
   5  -5   3  302.23   12.94
   5  -5   3  293.08   12.33
  -5   5  -4  526.30   21.01
   5  -5   4  616.42   24.33
   5  -5   4  608.48   23.91
  -5   5  -5  185.07    9.25
   5  -5   5  231.86   10.93
   5  -5   5  226.96   10.23
   5  -5   6   37.50    5.00
   5  -5   6   30.12    5.98
   5  -5   7  977.87   37.97
   5  -5   7  977.41   38.20
   5  -5   8  270.43   12.14
   5  -5   8  249.65   12.24
   5  -5   9  950.79   37.08
   5  -5   9  918.56   36.19
   5  -5  10  673.86   27.04
   5  -5  10  658.92   26.81
   5  -5  11  107.50    7.99
   5  -5  11   84.20    9.01
   5  -5  12  516.96   21.39
   5  -5  12  488.47   21.20
   5  -5  13  180.91   10.46
   5  -5  13  204.54   12.38
   5  -5  14   16.90    8.17
   5  -5  14   41.00    8.45
  -5   4  16  114.13    8.08
   5  -4 -16   96.67    7.33
  -5   4  15   23.77    7.38
   5  -4 -15   29.70    6.86
  -5   4  14  861.13   34.46
   5  -4 -14  858.32   34.18
  -5   4  13  254.09   13.64
   5  -4 -13  252.87   13.12
  -5   4  12  152.61   10.93
   5  -4 -12  152.14   10.27
  -5   4  11  285.42   14.52
   5  -4 -11  288.83   14.76
  -5   4  10  485.20   21.20
   5  -4 -10  464.14   20.08
  -5   4   9  555.72   23.77
   5  -4  -9  485.20   20.78
  -5   4   8  324.56   15.50
   5  -4  -8  298.22   14.10
  -5   4   7  660.32   27.09
   5  -4  -7  623.90   25.64
  -5   4   6  997.49   39.37
   5  -4  -6  901.75   35.82
  -5   4   5 2026.73   77.71
   5  -4  -5 1844.13   70.80
  -5   4   4 1498.56   57.91
   5  -4  -4 1334.65   51.74
  -5   4   3   50.48    6.91
   5  -4  -3   48.38    6.96
  -5   4   2  997.49   38.95
   5  -4  -2  930.24   36.24
  -5   4   1 1551.33   59.40
   5  -4  -1 1497.63   57.30
  -5   4   0  244.33   11.07
   5  -4   0  277.11   11.91
  -5   4  -1  866.26   33.58
   5  -4   1  939.11   36.10
  -5   4  -2  637.44   24.84
   5  -4   2  738.77   28.53
  -5   4  -3  119.27    6.21
   5  -4   5  585.60   22.84
   5  -4   5  528.63   20.87
   5  -4   6    7.00    4.02
   5  -4   6   13.96    4.95
   5  -4   7  164.52    8.17
   5  -4   7  150.14    8.55
   5  -4   8  344.31   14.57
   5  -4   8  330.95   14.76
   5  -4   9  796.21   31.19
   5  -4   9  752.78   29.98
   5  -4  10  120.76    8.03
   5  -4  10   96.25    8.13
   5  -4  11  464.23   19.47
   5  -4  11  446.44   19.29
   5  -4  12  126.74    8.78
   5  -4  12  123.47    9.48
   5  -4  13   48.94    7.43
   5  -4  13   62.39    8.55
   5  -4  14    1.21    7.94
   5  -4  14   -7.05    7.94
  -5   3  17   23.30    6.72
  -5   3  17   13.40    7.89
   5  -3 -17   10.23    5.65
  -5   3  16   89.57    8.59
   5  -3 -16   75.61    6.96
  -5   3  15  578.13   24.38
   5  -3 -15  548.24   22.74
  -5   3  14   23.58    8.17
   5  -3 -14    8.08    6.49
  -5   3  13  378.54   17.61
   5  -3 -13  367.19   16.76
  -5   3  12  614.09   25.82
   5  -3 -12  529.56   22.42
  -5   3  11 1143.65   44.97
   5  -3 -11 1119.37   43.85
  -5   3  10 1557.87   60.52
   5  -3 -10 1495.76   57.95
  -5   3   9   10.79    7.89
   5  -3  -9   -0.19    6.96
  -5   3   8 1091.35   43.01
   5  -3  -8  975.54   38.39
  -5   3   7  144.49   10.04
   5  -3  -7  137.95    9.11
  -5   3   6 2069.69   79.39
   5  -3  -6 1906.71   73.22
  -5   3   5  737.84   29.47
   5  -3  -5  709.82   28.49
  -5   3   4 2620.74   99.80
   5  -3  -4 2262.09   86.30
  -5   3   3  124.27    8.13
   5  -3  -3  101.15    7.52
  -5   3   2  309.52   13.40
   5  -3  -2  286.22   12.61
  -5   3   1  244.56   10.83
   5  -3  -1  214.25    9.57
  -5   3   0  527.23   20.69
   5  -3   0  495.94   19.43
  -5   3  -1   47.54    3.64
   5  -3   1   50.11    3.13
   5  -3   6  188.43    8.50
   5  -3   6  207.20    8.83
   5  -3   7  191.23    8.78
   5  -3   7  178.72    8.92
   5  -3   8  214.67   10.60
   5  -3   8  226.54   10.32
  -5   3  -9  109.37    7.19
   5  -3   9   65.99    7.47
   5  -3   9   87.19    6.86
  -5   3 -10   22.28    5.60
   5  -3  10    8.03    6.68
   5  -3  10   16.58    6.49
  -5   3 -11  165.41    9.81
   5  -3  11  125.67    9.01
   5  -3  11  154.20    9.15
  -5   3 -12  827.50   32.83
   5  -3  12  570.66   23.40
   5  -3  12  594.48   24.56
  -5   3 -13  488.47   20.55
  -5   3 -14    6.21    7.89
   5  -3  14    1.63    8.22
   5  -3  14   19.38    7.66
  -5   2  17   -7.00    7.57
  -5   2  17    5.79    6.91
   5  -2 -17    0.93    6.12
  -5   2  16   59.03    8.36
  -5   2  16   59.31    8.36
   5  -2 -16   55.85    7.00
   5  -2 -15  207.86   11.16
  -5   2  14  179.84   11.44
   5  -2 -14  164.10   10.23
  -5   2  13 1791.36   69.21
   5  -2 -13 1690.50   65.19
  -5   2  12   54.50    8.50
   5  -2 -12   55.85    7.80
  -5   2  11 1468.21   57.11
   5  -2 -11 1391.16   54.03
  -5   2  10  181.94   11.35
   5  -2 -10  163.40   10.04
  -5   2   9 1148.79   45.11
   5  -2  -9 1060.06   41.47
  -5   2   8   61.18    8.41
   5  -2  -8   58.23    7.33
  -5   2   7 1455.60   56.27
   5  -2  -7 1353.33   52.54
  -5   2   6  465.54   19.85
   5  -2  -6  440.65   18.91
  -5   2   5 1147.86   44.55
   5  -2  -5 1092.28   42.59
  -5   2   4   46.79    6.35
   5  -2  -4   41.09    6.12
  -5   2   3  829.84   32.46
   5  -2  -3  724.30   28.49
  -5   2   2  238.82   10.79
   5  -2  -2  194.45    9.20
  -5   2   1  417.44   16.67
   5  -2  -1  351.22   14.06
  -5   2   0  105.96    5.37
  -5   2   0   95.55    4.67
   5  -2   0   74.86    3.74
  -5   2  -6  112.45    5.65
  -5   2  -7   10.13    4.25
  -5   2  -8  186.94    9.15
   5  -2   8  160.13    8.27
   5  -2   8  164.52    9.06
  -5   2  -9   12.42    5.42
   5  -2   9   10.74    5.32
   5  -2   9   11.21    6.40
  -5   2 -10  105.35    7.38
   5  -2  10   83.64    7.19
   5  -2  10   91.34    7.80
  -5   2 -11   57.77    7.10
   5  -2  11   49.27    7.47
   5  -2  11   34.56    6.68
  -5   2 -12  294.11   14.06
   5  -2  12  258.38   12.70
   5  -2  12  237.56   12.42
  -5   2 -13  170.64   10.60
   5  -2  13  140.70    9.67
   5  -2  13  114.46    8.83
  -5   2 -14  197.44   11.72
  -5   1  17  218.74   11.63
  -5   1  17  257.08   12.98
   5  -1 -17  257.68   12.14
  -5   1  16    3.22    7.85
  -5   1  16    7.29    8.13
   5  -1 -16  -11.16    6.77
   5  -1 -15   31.10    7.43
  -5   1  14  142.43   10.09
  -5   1  14  154.90   11.02
   5  -1 -14  143.55    9.85
  -5   1  13   42.96    8.59
  -5   1  13   36.43    8.55
   5  -1 -13   50.20    8.22
  -5   1  12 1222.11   48.01
  -5   1  12 1213.70   47.63
   5  -1 -12 1138.98   44.55
  -5   1  11   20.41    8.31
  -5   1  11    5.70    8.22
   5  -1 -11   13.17    7.19
  -5   1  10  457.18   19.94
   5  -1 -10  403.29   17.61
  -5   1   9  375.22   17.33
   5  -1  -9  358.46   16.11
  -5   1   8  167.88   10.09
   5  -1  -8  140.56    9.06
  -5   1   7    2.76    6.82
   5  -1  -7   -5.23    7.14
   5  -1  -6 1981.90   75.89
  -5   1   5  117.03    8.97
  -5   1   5  104.14    8.17
   5  -1  -5   84.76    7.66
  -5   1   4  770.53   30.40
  -5   1   4  842.45   33.48
   5  -1  -4  740.18   29.28
  -5   1   3  182.87    9.43
  -5   1   3  173.49    9.81
   5  -1  -3  166.06    8.78
  -5   1   2 2518.46   95.64
  -5   1   2 2633.81  100.08
   5  -1  -2 2390.51   90.78
  -5   1   1  144.02    7.38
  -5   1   1  139.86    6.77
   5  -1  -1  109.93    5.70
  -5   1  -4  954.52   39.51
  -5   1  -5  259.27   10.60
  -5   1  -6    3.69    4.02
   5  -1   6    4.34    3.83
   5  -1   6    2.38    4.34
  -5   1  -7  173.35    8.45
  -5   1  -8  137.43    8.03
   5  -1   8  108.34    7.14
   5  -1   8  123.42    8.45
  -5   1  -9   13.40    5.56
   5  -1   9    7.66    6.12
   5  -1   9    9.15    5.74
  -5   1 -10    2.99    6.02
   5  -1  10   12.61    6.44
   5  -1  10    3.08    6.54
  -5   1 -11  384.61   17.09
   5  -1  11  311.11   14.15
   5  -1  11  294.11   14.10
  -5   1 -12   24.33    7.24
   5  -1  12   25.40    7.10
   5  -1  12   16.11    7.47
  -5   1 -13  116.89    9.20
   5  -1  13   79.67    8.22
   5  -1  13   81.68    8.69
  -5   1 -14    7.71    8.31
   5  -1  14   19.57    8.64
   5  -1  14    3.55    7.38
   5   0 -18   50.25    6.35
  -5   0  17  159.20   10.51
  -5   0  17  142.66    9.71
   5   0 -17  168.96    9.39
  -5   0  16   43.20    8.83
  -5   0  16   48.61    8.27
   5   0 -16   52.96    7.52
  -5   0  15 1053.52   41.84
   5   0 -15 1074.54   42.17
  -5   0  14   20.69    8.41
  -5   0  14   25.78    8.69
   5   0 -14   16.81    7.10
  -5   0  13  351.78   16.62
  -5   0  13  359.16   17.09
   5   0 -13  329.65   15.60
  -5   0  12  506.68   21.90
  -5   0  12  487.54   21.48
   5   0 -12  526.30   22.09
  -5   0  11  197.30   12.05
  -5   0  11  202.39   12.38
   5   0 -11  213.27   11.53
  -5   0  10    8.27    7.85
  -5   0  10   14.24    8.13
   5   0 -10   23.77    6.82
  -5   0   9  862.06   34.56
  -5   0   9  842.45   33.95
   5   0  -9  875.13   34.60
  -5   0   8   27.93    7.19
  -5   0   8   17.19    8.22
   5   0  -8   30.40    7.38
  -5   0   7   71.50    7.71
  -5   0   7   86.58    9.15
   5   0  -7   72.66    7.75
  -5   0   6 1616.71   62.25
  -5   0   6 1782.03   68.65
   5   0  -6 1589.16   61.18
  -5   0   5 7625.91  288.27
  -5   0   5 6841.37  258.90
  -5   0   4  737.84   29.28
  -5   0   4  728.03   29.23
   5   0  -4  673.86   26.85
  -5   0   3 1162.33   44.83
  -5   0   3 1233.78   47.73
   5   0  -3 1097.42   42.31
   5   0  -2  848.98   32.83
  -5   0   1 2982.65  113.15
  -5   0   1 3298.33  125.15
  -5   0   0  746.71   28.81
  -5   0   0  690.21   26.76
   5   0   0  790.14   30.59
  -5   0  -1 1031.58   39.60
  -5   0  -1  988.15   38.06
   5   0   1 1204.83   46.28
   5   0   2 1736.26   66.64
  -5   0  -3  211.83    9.01
   5   0   3  230.93    9.67
  -5   0  -4  285.05   11.77
   5   0   4  320.07   13.22
  -5   0  -5  761.66   29.61
   5   0   5  757.92   29.51
  -5   0  -6  472.12   19.01
   5   0   6  496.87   20.08
  -5   0  -7   45.06    5.79
   5   0   7   41.75    6.35
  -5   0  -8   95.64    6.68
   5   0   8  107.50    7.71
  -5   0  -9   17.00    5.93
   5   0   9    6.58    5.93
   5   0   9    6.26    6.44
  -5   0 -10 1138.98   44.46
   5   0  10 1027.84   40.21
   5   0  10  907.82   35.68
  -5   0 -11    8.59    7.24
   5   0  11    7.66    6.91
   5   0  11    7.19    7.29
  -5   0 -12   67.57    8.13
   5   0  12   56.13    8.08
   5   0  12   56.88    7.66
  -5   0 -13   94.14    9.20
   5   0  13   58.51    8.13
   5   0  13   52.54    8.31
   5   1 -18  228.12   11.02
  -5  -1  17   86.02    8.73
  -5  -1  17   79.67    8.69
   5   1 -17   86.86    7.66
  -5  -1  16  134.59   10.32
  -5  -1  16  138.32   10.37
   5   1 -16  132.81    8.97
  -5  -1  15    8.41    7.75
  -5  -1  15   18.07    8.50
  -5  -1  14  448.92   19.99
  -5  -1  14  403.10   18.40
   5   1 -14  448.54   19.33
  -5  -1  13   22.32    8.50
  -5  -1  13   11.77    8.73
   5   1 -13   15.32    7.61
  -5  -1  12  643.51   26.62
  -5  -1  12  657.05   27.41
   5   1 -12  622.03   25.54
  -5  -1  11   43.99    8.78
  -5  -1  11   48.01    9.01
   5   1 -11   42.96    7.75
  -5  -1  10  759.79   30.77
  -5  -1  10  773.33   31.52
   5   1 -10  738.31   29.65
  -5  -1   9    9.11    7.85
  -5  -1   9    5.56    7.57
   5   1  -9   -1.87    6.63
  -5  -1   8  658.45   27.04
  -5  -1   8  664.52   27.51
   5   1  -8  690.67   28.07
  -5  -1   7  258.52   13.50
  -5  -1   7  238.40   12.56
   5   1  -7  261.75   12.98
  -5  -1   6   39.41    7.38
  -5  -1   6   41.47    7.94
   5   1  -6   42.78    7.05
  -5  -1   5 3061.10  116.56
  -5  -1   5 2921.94  111.10
   5   1  -5 2927.55  111.33
  -5  -1   4  376.39   16.76
  -5  -1   4  374.43   16.16
   5   1  -4  349.31   15.92
   5   1  -4  390.59   16.81
  -5  -1   3 1472.41   56.51
  -5  -1   3 1444.86   55.71
   5   1  -3 1491.09   57.49
  -5  -1   2  187.78    9.95
  -5  -1   2  162.93    8.55
   5   1  -2  205.99   10.74
  -5  -1   1  683.67   26.71
  -5  -1   1  702.82   27.74
   5   1  -1  840.58   32.97
  -5  -1   0 1663.88   63.42
  -5  -1   0 1554.60   59.45
   5   1   0 1742.33   66.64
   5   1   1  574.86   22.84
  -5  -1  -2  548.24   21.76
   5   1   2  638.84   25.17
  -5  -1  -3  815.36   31.66
   5   1   3  938.18   36.33
  -5  -1  -4    6.58    4.90
   5   1   4   13.03    5.84
  -5  -1  -5   86.77    6.12
   5   1   5   91.02    6.82
  -5  -1  -6  182.17    9.29
   5   1   6  186.89    9.85
  -5  -1  -7  544.51   22.04
   5   1   7  521.16   21.53
  -5  -1  -8  108.99    7.99
   5   1   8  111.05    8.31
  -5  -1  -9  203.05   10.74
   5   1   9  181.28   10.27
  -5  -1 -10   15.83    6.91
   5   1  10   23.63    7.38
  -5  -1 -11  430.33   18.59
   5   1  11  397.36   17.61
  -5  -1 -12   68.55    7.75
   5   1  12   58.79    8.08
   5   1  12   73.83    8.55
  -5  -1 -13    7.66    8.17
   5   1  13   17.61    8.36
   5   1  13   11.02    7.66
  -5  -2  18   24.33    7.33
  -5  -2  18   17.98    7.00
   5   2 -18    3.08    5.88
  -5  -2  17   60.01    8.45
  -5  -2  17   69.58    8.73
   5   2 -17   53.42    6.82
  -5  -2  16   10.13    8.36
  -5  -2  16    6.58    7.66
   5   2 -16   26.06    6.91
  -5  -2  15   55.62    8.83
  -5  -2  15   42.36    8.50
  -5  -2  14  131.78   10.46
  -5  -2  14  145.19   10.23
   5   2 -14  118.61    9.25
  -5  -2  13   70.52    9.06
  -5  -2  13   61.64    8.92
   5   2 -13   51.88    8.17
  -5  -2  12 1395.36   54.54
  -5  -2  12 1366.41   53.33
   5   2 -12 1412.17   54.78
  -5  -2  11 2047.74   78.92
  -5  -2  11 2086.97   80.23
   5   2 -11 2103.78   80.65
  -5  -2  10  616.42   25.54
  -5  -2  10  608.48   25.59
   5   2 -10  630.90   25.82
  -5  -2   9  521.63   22.18
  -5  -2   9  547.78   23.30
   5   2  -9  517.89   21.67
  -5  -2   8   39.04    8.59
  -5  -2   8   28.91    8.03
   5   2  -8   23.21    7.38
  -5  -2   7 1789.96   68.83
  -5  -2   7 1848.34   71.26
   5   2  -7 1905.78   73.04
  -5  -2   6  398.67   17.33
  -5  -2   6  390.03   17.79
   5   2  -6  401.75   17.37
   5   2  -6  429.58   19.38
  -5  -2   5  317.97   14.62
  -5  -2   5  331.19   15.50
   5   2  -5  345.52   16.44
   5   2  -5  311.99   14.06
  -5  -2   4  319.28   14.85
  -5  -2   4  354.02   15.55
   5   2  -4  323.16   15.32
  -5  -2   3  563.65   23.21
  -5  -2   3  611.29   24.56
   5   2  -3  598.21   24.66
  -5  -2   2  251.15   11.72
  -5  -2   2  215.84   11.11
   5   2  -2  227.28   11.81
  -5  -2   1   40.11    6.58
  -5  -2   1   34.46    5.79
   5   2  -1   47.59    7.14
  -5  -2   0    3.13    6.35
   5   2   0    4.62    6.30
  -5  -2  -1  416.23   17.56
   5   2   1  477.73   19.85
  -5  -2  -2 1442.06   55.43
   5   2   2 1653.14   63.46
  -5  -2  -3  502.01   20.55
   5   2   3  535.63   21.71
  -5  -2  -4 2161.22   82.52
   5   2   4 2413.86   92.04
  -5  -2  -5  890.55   34.98
   5   2   5  894.28   35.21
  -5  -2  -6  107.45    7.89
   5   2   6  127.25    8.73
  -5  -2  -7    9.11    6.40
   5   2   7   12.98    7.14
  -5  -2  -8  981.61   38.67
   5   2   8  967.13   38.01
  -5  -2  -9   15.74    7.38
   5   2   9   27.04    7.24
  -5  -2 -10  607.55   25.08
   5   2  10  553.85   22.98
  -5  -2 -11   52.26    8.22
   5   2  11   68.55    8.17
  -5  -2 -12  684.60   27.88
   5   2  12  630.90   25.87
  -5  -3  18   81.91    7.89
  -5  -3  18   74.81    8.17
   5   3 -18   83.68    7.14
  -5  -3  17   19.85    7.94
  -5  -3  17   26.81    7.43
   5   3 -17    8.83    6.07
  -5  -3  16   14.10    8.31
  -5  -3  16    2.15    8.13
   5   3 -16   -2.33    6.91
  -5  -3  15  161.16   10.97
  -5  -3  15  156.53   10.97
  -5  -3  14  130.20    9.76
  -5  -3  14  124.03   10.37
   5   3 -14  120.95    9.15
  -5  -3  13  776.60   31.47
  -5  -3  13  781.74   31.80
   5   3 -13  744.85   30.12
  -5  -3  12  194.64   11.39
  -5  -3  12  200.90   12.24
   5   3 -12  206.97   11.67
  -5  -3  11  847.12   34.00
  -5  -3  11  886.81   35.77
   5   3 -11  869.53   34.65
  -5  -3  10  509.48   22.04
  -5  -3  10  511.35   22.46
   5   3 -10  502.01   21.29
  -5  -3   9   76.35    8.08
  -5  -3   9   87.14    9.34
   5   3  -9   81.96    8.13
  -5  -3   8  500.61   21.81
  -5  -3   8  478.66   20.64
   5   3  -8  486.13   21.39
   5   3  -8  490.80   20.69
  -5  -3   7  301.81   15.27
  -5  -3   7  299.29   14.57
   5   3  -7  298.12   13.87
   5   3  -7  306.86   15.46
  -5  -3   6   87.23    9.11
  -5  -3   6   67.57    8.03
   5   3  -6   79.71    9.53
  -5  -3   5  973.67   38.34
  -5  -3   5  993.75   39.41
   5   3  -5 1039.98   41.33
  -5  -3   4   70.61    7.75
  -5  -3   4   79.34    8.64
   5   3  -4   89.24    9.11
  -5  -3   3    1.21    6.63
  -5  -3   3   10.41    7.47
   5   3  -3   -1.45    7.71
  -5  -3   2 1454.20   56.27
  -5  -3   2 1492.49   57.39
   5   3  -2 1632.12   63.04
  -5  -3   1   91.90    7.05
  -5  -3   1   75.23    7.61
   5   3  -1  103.39    8.64
  -5  -3   0   14.24    6.63
   5   3   0   10.60    6.82
  -5  -3  -1 1855.34   71.22
   5   3   1 1971.62   75.51
  -5  -3  -2  580.93   23.86
   5   3   2  661.72   26.71
  -5  -3  -3 1611.11   62.06
   5   3   3 1826.86   70.19
  -5  -3  -4  285.75   13.73
   5   3   4  318.07   14.80
  -5  -3  -5 3581.33  136.17
   5   3   5 3922.23  149.11
  -5  -3  -6  298.50   14.29
   5   3   6  297.80   14.43
  -5  -3  -7  348.33   15.78
   5   3   7  372.52   17.05
  -5  -3  -8  -19.19    7.66
   5   3   8    8.78    7.33
  -5  -3  -9  799.95   32.32
   5   3   9  773.80   31.19
  -5  -3 -10  133.09    9.81
   5   3  10  118.33    9.43
  -5  -3 -11  140.47   10.18
   5   3  11  128.19    9.57
  -5  -4  18   -7.57    7.71
  -5  -4  18   -7.19    6.86
   5   4 -18    6.91    5.70
  -5  -4  17  117.49    8.64
  -5  -4  17  113.20    9.25
   5   4 -17  115.44    7.85
  -5  -4  16   34.98    8.69
  -5  -4  16   32.55    7.80
   5   4 -16   44.64    7.05
  -5  -4  15  335.25   15.74
  -5  -4  15  340.85   16.62
   5   4 -15  328.34   15.50
  -5  -4  14  174.23   11.21
  -5  -4  14  182.27   11.11
   5   4 -14  184.04   10.93
  -5  -4  13  268.10   14.10
  -5  -4  13  259.18   13.50
   5   4 -13  284.26   13.92
  -5  -4  12  176.94   11.44
  -5  -4  12  183.39   10.97
   5   4 -12  191.37   11.21
  -5  -4  11  301.77   14.90
  -5  -4  11  303.45   15.41
   5   4 -11  300.74   14.57
  -5  -4  10  126.09    9.53
  -5  -4  10  104.98   10.23
   5   4 -10  125.76    9.48
   5   4 -10   91.76    9.76
  -5  -4   9  725.70   29.56
  -5  -4   9  692.08   28.77
   5   4  -9  686.94   28.81
  -5  -4   8  333.15   15.64
  -5  -4   8  393.53   18.40
   5   4  -8  385.03   18.26
  -5  -4   7   46.04    7.71
  -5  -4   7   24.94    8.50
   5   4  -7   28.11    8.64
  -5  -4   6  507.62   21.53
  -5  -4   6  509.48   22.18
   5   4  -6  524.43   22.51
  -5  -4   5   -0.19    6.21
  -5  -4   5    1.35    7.99
   5   4  -5   12.61    7.89
  -5  -4   4  621.09   25.17
  -5  -4   4  662.66   27.27
   5   4  -4  702.82   28.81
  -5  -4   3   55.81    7.05
  -5  -4   3   47.31    8.08
   5   4  -3   60.19    8.13
  -5  -4   2 1297.76   50.25
  -5  -4   2 1316.91   51.32
   5   4  -2 1492.49   57.95
  -5  -4   1  125.53    9.39
   5   4  -1  132.86    9.62
  -5  -4   0  672.93   27.65
   5   4   0  767.73   31.01
  -5  -4  -1 1427.11   55.34
   5   4   1 1425.25   55.29
  -5  -4  -2 2977.05  113.48
   5   4   2 3342.23  127.30
  -5  -4  -3  876.07   34.93
   5   4   3 1005.42   39.88
  -5  -4  -4  492.67   21.11
   5   4   4  573.46   24.24
  -5  -4  -5   34.37    8.31
   5   4   5   55.66    8.78
  -5  -4  -6   63.88    8.45
   5   4   6   57.86    9.01
  -5  -4  -7    9.43    8.17
   5   4   7   17.70    7.80
  -5  -4  -8  122.30    9.43
   5   4   8  136.03    9.95
  -5  -4  -9  137.06   10.23
   5   4   9  134.96    9.67
  -5  -4 -10  284.26   14.29
   5   4  10  257.26   13.17
  -5  -5  17   43.80    8.08
  -5  -5  17   58.89    7.14
   5   5 -17   48.66    6.35
  -5  -5  16  264.55   13.22
  -5  -5  16  232.37   12.84
   5   5 -16  243.72   12.00
  -5  -5  15   88.40    8.41
  -5  -5  15  103.62   10.55
   5   5 -15   70.19    7.99
  -5  -5  14 1013.83   39.97
  -5  -5  14 1030.64   40.95
   5   5 -14 1030.64   40.53
  -5  -5  13  342.63   16.67
  -5  -5  13  347.81   16.48
   5   5 -13  348.79   15.97
  -5  -5  12  100.82    8.97
  -5  -5  12  116.89   10.79
  -5  -5  11    2.48    8.73
  -5  -5  11   17.93    7.52
   5   5 -11    7.29    9.34
  -5  -5  10  354.49   16.39
  -5  -5  10  320.96   16.34
   5   5 -10  296.77   15.50
  -5  -5   9 1215.10   47.68
  -5  -5   9 1104.43   43.85
   5   5  -9 1128.71   44.97
  -5  -5   8  329.93   15.74
  -5  -5   8  297.56   15.55
   5   5  -8  283.60   15.18
  -5  -5   7   -6.49    9.06
  -5  -5   7   13.26    7.43
   5   5  -7   23.07    9.43
  -5  -5   6   84.29    9.90
  -5  -5   6   79.01    7.99
   5   5  -6   88.68    9.90
  -5  -5   5 1015.23   40.02
  -5  -5   5 1048.85   41.75
   5   5  -5 1145.52   45.58
  -5  -5   4   99.42    7.89
  -5  -5   4  100.92   10.55
   5   5  -4  120.62   10.23
  -5  -5   3  190.72   10.55
  -5  -5   3  206.97   12.42
   5   5  -3  230.32   13.50
  -5  -5   2  320.68   15.64
   5   5  -2  353.84   16.81
  -5  -5   1 1074.07   42.50
   5   5  -1 1148.79   45.39
  -5  -5   0  298.22   14.90
   5   5   0  324.42   15.60
  -5  -5  -1 2259.29   86.63
   5   5   1 2439.54   93.54
  -5  -5  -2  433.64   19.24
   5   5   2  500.61   21.86
  -5  -5  -3  280.38   14.66
   5   5   3  327.73   15.88
  -5  -5  -4    8.69    8.13
   5   5   4    5.23    8.36
  -5  -5  -5  471.66   21.01
   5   5   5  512.75   22.46
  -5  -5  -6   18.82    8.31
   5   5   6    7.24    8.31
  -5  -5  -7   22.74    8.69
   5   5   7   24.38    8.03
  -5  -5  -8   92.56    8.92
   5   5   8   95.31    8.83
  -5  -5  -9   90.32    9.48
   5   5   9   78.03    9.25
  -5  -6  17   47.63    6.49
  -5  -6  17   43.38    8.08
  -5  -6  16  244.05   12.52
  -5  -6  15   41.75    7.43
  -5  -6  15   49.27    8.97
  -5  -6  14  145.70   11.30
  -5  -6  14  132.95    9.34
  -5  -6  13  407.54   18.49
  -5  -6  13  407.82   18.77
  -5  -6  12  300.04   14.66
  -5  -6  12  329.55   16.44
   5   6 -12  319.65   16.39
  -5  -6  11   21.39    8.13
  -5  -6  11   27.37    9.29
   5   6 -11   27.46    9.90
  -5  -6  10  292.80   14.38
  -5  -6  10  319.79   16.02
   5   6 -10  329.74   16.67
  -5  -6   9   18.03    9.01
  -5  -6   9   12.47    7.75
   5   6  -9    8.45    9.53
  -5  -6   8    1.82    9.43
  -5  -6   8   17.05    7.94
   5   6  -8   13.64    9.11
  -5  -6   7   81.77   10.09
  -5  -6   7  103.06    9.25
   5   6  -7   97.93   10.60
  -5  -6   6   56.93    8.17
  -5  -6   6   72.38    9.57
   5   6  -6   62.95   10.51
  -5  -6   5  252.17   12.94
  -5  -6   5  250.17   13.96
   5   6  -5  263.43   15.08
  -5  -6   4   18.77    7.24
  -5  -6   4   19.38    8.55
   5   6  -4   19.75    8.73
  -5  -6   3  334.46   16.44
  -5  -6   3  317.97   15.13
   5   6  -3  381.58   18.03
  -5  -6   2   56.51    9.25
   5   6  -2   59.21    9.48
  -5  -6   1  249.89   13.64
   5   6  -1  264.13   14.34
  -5  -6   0  140.98   10.83
   5   6   0  153.92   11.58
  -5  -6  -1  144.21   11.11
   5   6   1  141.36   10.83
  -5  -6  -2  602.41   25.59
   5   6   2  624.36   26.24
  -5  -6  -3   58.51    9.39
   5   6   3   56.79    9.15
  -5  -6  -4  235.36   13.82
   5   6   4  282.06   14.90
  -5  -6  -5   11.07    8.59
   5   6   5   14.90    8.17
  -5  -6  -6  558.05   24.10
   5   6   6  553.85   23.35
  -5  -6  -7  110.40    9.99
   5   6   7  134.03   10.23
  -5  -6  -8  454.99   20.27
   5   6   8  471.66   20.64
  -5  -7  15   -0.70    6.54
  -5  -7  15   -7.29    7.71
  -5  -7  14   80.56    9.34
  -5  -7  14   79.01    8.41
  -5  -7  13   -3.27    7.85
  -5  -7  13    0.28    8.87
   5   7 -13    2.15    9.06
  -5  -7  12  196.37   11.81
  -5  -7  12  181.94   12.24
   5   7 -12  153.97   11.77
  -5  -7  11  354.12   16.58
  -5  -7  11  362.71   17.51
   5   7 -11  342.54   17.14
  -5  -7  10  155.97   11.49
  -5  -7  10  177.13   11.07
   5   7 -10  179.00   12.42
  -5  -7   9  413.38   18.54
  -5  -7   9  396.19   18.68
   5   7  -9  436.31   20.27
  -5  -7   8   -1.45    8.73
  -5  -7   8   -0.05    7.75
   5   7  -8    4.67    9.57
  -5  -7   7   74.72    8.73
  -5  -7   7   89.76   10.32
   5   7  -7   95.27   11.07
  -5  -7   6  191.56   10.97
  -5  -7   6  196.46   12.70
   5   7  -6  196.13   12.94
  -5  -7   5  664.06   27.83
  -5  -7   5  726.17   29.47
   5   7  -5  742.04   31.05
  -5  -7   4  108.25    9.15
  -5  -7   4  103.67   10.27
   5   7  -4  113.90   11.21
  -5  -7   3   -6.02    8.59
  -5  -7   3   13.87    6.91
   5   7  -3    2.24    9.39
  -5  -7   2    4.86    9.29
   5   7  -2   -4.06    8.87
  -5  -7   1   68.60   10.13
   5   7  -1   72.62   10.09
  -5  -7   0    6.21    9.29
   5   7   0    5.18    8.59
  -5  -7  -1    5.04    9.48
   5   7   1    7.14    8.97
  -5  -7  -2   47.40    9.25
   5   7   2   37.03    9.39
  -5  -7  -3  591.21   25.54
   5   7   3  627.63   26.34
  -5  -7  -4  100.36   10.41
   5   7   4  115.21   10.18
  -5  -7  -5  941.45   37.78
   5   7   5 1009.16   40.21
  -5  -7  -6  450.78   20.31
   5   7   6  542.64   23.30
  -5  -7  -7  181.38   12.05
   5   7   7  226.26   12.98
  -5  -8  15   21.76    6.21
  -5  -8  15   35.63    7.57
  -5  -8  14    6.54    6.58
  -5  -8  14   18.31    8.36
   5   8 -14   -1.12    8.17
  -5  -8  13  277.53   13.45
  -5  -8  13  269.55   14.01
   5   8 -13  269.87   14.48
  -5  -8  12  408.10   18.07
  -5  -8  12  403.34   18.82
   5   8 -12  412.44   19.29
  -5  -8  11   22.60    7.85
  -5  -8  11   14.99    9.11
   5   8 -11   25.82    9.95
  -5  -8  10  314.14   15.27
  -5  -8  10  317.22   15.88
   5   8 -10  344.26   17.61
  -5  -8   9    2.19    7.89
  -5  -8   9   22.93    9.67
   5   8  -9   10.32    9.29
   5   8  -8  234.89   14.57
  -5  -8   7  279.26   14.99
  -5  -8   7  305.88   14.90
   5   8  -7  311.57   16.72
  -5  -8   6 1132.91   44.50
  -5  -8   6 1136.65   45.16
   5   8  -6 1268.81   50.25
  -5  -8   5   36.05    9.20
  -5  -8   5   54.08    7.71
   5   8  -5   47.73    9.57
  -5  -8   4   67.06    8.41
  -5  -8   4   71.78   10.32
   5   8  -4   83.50   10.83
  -5  -8   3   15.83    9.57
   5   8  -3    4.16    9.20
  -5  -8   2  138.70   11.63
   5   8  -2  142.43   11.81
  -5  -8   1    9.62    9.67
   5   8  -1   15.13    9.39
  -5  -8   0   25.36    9.95
   5   8   0   22.18    9.43
  -5  -8  -1  275.15   15.55
   5   8   1  270.62   14.99
  -5  -8  -2  279.63   15.08
   5   8   2  315.50   15.88
  -5  -8  -3   21.81    9.20
   5   8   3   39.09    9.57
  -5  -8  -4  437.61   19.85
   5   8   4  509.48   22.28
  -5  -8  -5  178.39   12.33
   5   8   5  189.78   12.28
  -5  -9  14    2.10    6.35
  -5  -9  14   16.95    7.71
   5   9 -14   -4.81    7.38
  -5  -9  13  281.97   13.31
  -5  -9  13  267.58   13.59
   5   9 -13  265.34   13.54
  -5  -9  12   98.86    9.67
  -5  -9  12   83.78    7.75
   5   9 -12   84.43    9.43
  -5  -9  11  457.27   20.27
  -5  -9  11  479.13   20.45
   5   9 -11  484.73   21.67
  -5  -9  10   -6.96    8.83
  -5  -9  10   -7.05    7.38
   5   9 -10    3.50    9.71
  -5  -9   9  265.25   14.76
  -5  -9   9  278.98   13.73
   5   9  -9  291.68   15.74
  -5  -9   8   -5.23    9.99
  -5  -9   8   12.14    7.80
   5   9  -8   -6.54    9.90
  -5  -9   7   27.93   10.04
  -5  -9   7   32.13    7.85
   5   9  -7   33.06   10.13
  -5  -9   6  352.20   16.34
  -5  -9   6  348.61   17.70
   5   9  -6  419.03   19.94
  -5  -9   5  325.63   16.62
  -5  -9   5  355.42   16.44
   5   9  -5  372.33   18.35
  -5  -9   4    3.83    7.05
  -5  -9   4    4.67    9.20
   5   9  -4   13.87    9.11
  -5  -9   3  220.42   13.87
   5   9  -3  221.91   13.36
  -5  -9   2    1.96    9.99
   5   9  -2   10.55    9.01
  -5  -9   1   16.58    9.76
   5   9  -1   19.19    9.01
  -5  -9   0   14.57    9.25
   5   9   0    6.26    9.29
  -5  -9  -1  160.64   11.58
   5   9   1  198.61   12.33
  -5  -9  -2   19.43    8.92
   5   9   2   12.00    9.11
  -5  -9  -3  477.26   21.29
   5   9   3  546.84   23.68
  -5 -10  12  335.67   15.97
  -5 -10  12  326.61   14.57
   5  10 -12  339.73   15.69
  -5 -10  11   34.88    7.14
  -5 -10  11   37.87    8.41
   5  10 -11   41.24    8.69
  -5 -10  10  371.12   17.70
  -5 -10  10  411.18   17.79
   5  10 -10  390.78   18.07
  -5 -10   9   19.10    8.83
  -5 -10   9   12.33    7.24
   5  10  -9    1.17    8.97
  -5 -10   8  376.53   17.84
  -5 -10   8  406.42   17.84
   5  10  -8  393.06   18.73
  -5 -10   7   38.20    7.61
  -5 -10   7   37.45    9.15
   5  10  -7   49.83    9.90
  -5 -10   6    2.62    7.05
  -5 -10   6   13.54    9.81
   5  10  -6  -17.70    9.48
  -5 -10   5    5.88    7.19
  -5 -10   5   -3.97    8.78
   5  10  -5    4.11    9.53
  -5 -10   4  226.63   11.63
  -5 -10   4  210.14   12.98
   5  10  -4  247.36   14.06
  -5 -10   3    4.90    6.86
  -5 -10   3   35.77    9.99
   5  10  -3   -1.73    9.20
  -5 -10   2   78.50   10.09
   5  10  -2   85.27   10.46
  -5 -10   1   53.38    9.81
   5  10  -1   46.56    9.01
  -5 -10   0   57.30    9.81
   5  10   0   40.25    9.62
  -5 -10  -1   75.42    9.25
   5  10   1   93.54   10.18
  -5 -11   9   39.37    9.11
  -5 -11   9   29.75    6.82
   5  11  -9   17.28    8.50
  -5 -11   8   95.97    9.53
  -5 -11   8  105.45    8.31
   5  11  -8  106.01    9.99
  -5 -11   7    8.92    6.91
  -5 -11   7    0.98    8.17
   5  11  -7   13.92    9.01
  -5 -11   6  101.99    8.36
  -5 -11   6   96.85   10.74
   5  11  -6  118.85   10.55
  -5 -11   5  174.09   10.41
  -5 -11   5  176.75   11.81
   5  11  -5  201.55   12.84
  -5 -11   4   68.88    7.85
  -5 -11   4   51.51   10.04
   5  11  -4   70.84    9.57
  -5 -11   3  213.51   11.02
  -5 -11   3  202.16   12.38
   5  11  -3  219.25   12.56
  -6  13   2    9.62    7.94
   6 -13  -2    2.48    8.27
  -6  13   1   23.58    8.13
   6 -13  -1   22.70    8.17
  -6  13   0   81.72    9.25
   6 -13   0   88.07    9.99
  -6  13  -1  444.53   19.75
   6 -13   1  507.62   22.09
  -6  13  -2  342.96   16.86
   6 -13   2  404.18   18.73
  -6  13  -3   61.22    8.55
   6 -13   3   62.11    9.39
  -6  13  -4  239.00   13.31
   6 -13   4  276.08   14.43
  -6  13  -5  139.40   10.32
   6 -13   5  163.59   11.02
   6 -13   5  159.38   10.18
  -6  12   6   78.08    8.50
   6 -12  -6   71.03    8.17
  -6  12   5   84.62    9.01
   6 -12  -5   97.88    8.78
  -6  12   4    4.72    7.94
   6 -12  -4   -4.86    8.17
  -6  12   3   55.66    9.01
   6 -12  -3   77.15    9.01
  -6  12   2  346.79   16.48
   6 -12  -2  404.64   18.59
  -6  12   1    3.22    7.94
   6 -12  -1   18.68    8.92
  -6  12   0  255.86   13.36
   6 -12   0  302.75   15.18
  -6  12  -1  423.37   18.87
   6 -12   1  494.07   21.53
  -6  12  -2   88.96    9.76
   6 -12   2  108.25    9.90
  -6  12  -3  241.67   13.22
   6 -12   3  282.90   14.85
  -6  12  -4   94.38    9.29
   6 -12   4  142.99   10.79
  -6  12  -5  142.52   10.65
   6 -12   5  177.83   11.30
   6 -12   5  198.89   11.53
  -6  12  -6    2.33    8.64
   6 -12   6   -0.93    8.41
   6 -12   6   -2.05    7.89
  -6  12  -7  245.40   13.54
   6 -12   7  289.86   14.29
   6 -12   7  277.30   14.06
  -6  12  -8   53.33    9.25
   6 -12   8   53.28    8.64
   6 -12   8   64.35    8.59
  -6  11   8    2.71    7.71
   6 -11  -8    2.24    7.00
  -6  11   7  265.11   13.50
   6 -11  -7  258.94   13.03
  -6  11   6   14.76    8.03
   6 -11  -6   17.14    7.75
  -6  11   5  188.48   11.35
   6 -11  -5  230.18   12.47
  -6  11   4   26.43    7.94
   6 -11  -4   31.76    8.92
  -6  11   3  204.31   12.19
   6 -11  -3  250.87   13.82
  -6  11   2   26.43    9.71
   6 -11  -2   25.03    9.39
  -6  11   1   63.00    9.29
   6 -11  -1   86.30   10.09
  -6  11   0  105.31   10.13
   6 -11   0  106.10   10.37
  -6  11  -1   -5.84    8.22
   6 -11   1    7.47    8.78
  -6  11  -2  593.54   25.03
   6 -11   2  651.45   27.09
  -6  11  -3   15.04    8.27
   6 -11   3   14.29    8.36
  -6  11  -4  625.30   26.52
   6 -11   4  823.30   33.20
  -6  11  -5    3.22    8.59
   6 -11   5    9.06    7.43
   6 -11   5   19.24    8.41
  -6  11  -6   59.26    9.57
   6 -11   6   78.55    8.97
   6 -11   6   70.94    8.87
  -6  11  -7   27.65    9.06
   6 -11   7   23.68    7.94
   6 -11   7   29.42    7.80
  -6  11  -8   30.73    8.69
   6 -11   8   34.46    8.03
   6 -11   8   33.44    7.80
  -6  11  -9   46.75    8.69
   6 -11   9   69.95    8.59
   6 -11   9   73.13    8.50
  -6  11 -10  208.70   12.28
   6 -11  10  326.94   15.64
   6 -11  10  300.23   14.34
  -6  10  10  133.51    9.20
   6 -10 -10  112.73    8.41
  -6  10   9  208.93   11.72
   6 -10  -9  197.21   10.88
  -6  10   8  115.91    9.43
   6 -10  -8  100.96    8.97
  -6  10   7  152.56   10.09
   6 -10  -7  153.64   10.09
  -6  10   6  451.58   20.27
   6 -10  -6  503.88   21.86
  -6  10   5  136.36   10.13
   6 -10  -5  170.82   11.53
  -6  10   4  177.22   11.21
   6 -10  -4  209.49   12.70
  -6  10   3  278.70   14.29
   6 -10  -3  338.24   16.53
  -6  10   2  796.68   32.55
   6 -10  -2  960.59   38.53
  -6  10   1  137.99   11.39
   6 -10  -1  135.10   11.02
  -6  10   0   70.33    9.01
   6 -10   0   93.40    9.85
  -6  10  -1  301.95   15.13
   6 -10   1  347.21   16.30
  -6  10  -2   85.41    8.97
   6 -10   2   93.72    9.39
  -6  10  -3   54.92    8.27
   6 -10   3   65.94    9.06
  -6  10  -4    3.08    7.75
   6 -10   4    2.43    7.80
  -6  10  -5  281.50   13.92
   6 -10   5  410.67   18.49
   6 -10   5  382.70   17.09
  -6  10  -6  148.97   10.79
   6 -10   6  185.07   10.97
   6 -10   6  182.36   10.93
  -6  10  -7  161.67   11.11
   6 -10   7  157.61   10.83
   6 -10   7  186.70   10.88
  -6  10  -8   -0.70    8.45
   6 -10   8    0.28    7.14
   6 -10   8    2.19    8.03
  -6  10  -9  155.46   10.69
   6 -10   9  193.10   11.11
   6 -10   9  218.88   11.81
  -6  10 -10  114.41    9.81
   6 -10  10  165.69   10.37
   6 -10  10  145.56   10.18
  -6   9  11  212.71   11.81
   6  -9 -11  196.88   10.74
  -6   9  10  108.15    9.06
   6  -9 -10   96.25    8.69
  -6   9   9  136.17    9.81
   6  -9  -9  146.35    9.85
  -6   9   8  607.08   25.45
   6  -9  -8  609.89   25.26
  -6   9   7  279.73   14.20
   6  -9  -7  285.61   14.34
  -6   9   6  413.70   18.59
   6  -9  -6  468.39   20.87
  -6   9   5  599.61   25.12
   6  -9  -5  671.53   28.02
  -6   9   4   12.70    8.55
   6  -9  -4    4.48    8.41
  -6   9   3    9.01    7.99
   6  -9  -3    0.51    8.36
  -6   9   2   60.76    8.45
   6  -9  -2   79.48    9.71
  -6   9   1   -6.30    7.47
   6  -9  -1    5.37    8.69
  -6   9   0  293.08   14.48
   6  -9   0  315.82   15.50
  -6   9  -1    2.94    7.57
   6  -9   1    2.71    7.99
  -6   9  -2  587.47   24.56
   6  -9   2  653.32   26.81
  -6   9  -3    8.69    7.61
   6  -9   3   27.27    7.94
  -6   9  -4  105.68    9.11
   6  -9   4  125.11    9.29
  -6   9  -5   19.24    7.94
   6  -9   5   13.17    7.05
   6  -9   5   16.39    8.13
  -6   9  -6  220.28   12.28
   6  -9   6  230.37   11.72
   6  -9   6  231.16   12.52
  -6   9  -7  184.69   11.02
   6  -9   7  255.07   12.47
   6  -9   7  264.41   13.17
  -6   9  -8  509.95   21.67
   6  -9   8  583.73   24.24
   6  -9   8  598.21   24.52
  -6   9  -9   36.14    8.13
   6  -9   9   52.35    8.41
   6  -9   9   36.33    7.24
   6  -9  10  211.17   12.05
   6  -9  10  245.64   12.38
   6  -9  11   10.32    8.27
   6  -9  11   -0.23    7.80
   6  -9  12   44.18    8.45
   6  -9  12   56.79    8.78
  -6   8  12  627.16   25.73
   6  -8 -12  607.08   24.80
  -6   8  11    3.22    7.71
   6  -8 -11   10.13    7.19
  -6   8  10   16.44    7.66
   6  -8 -10    5.56    7.43
  -6   8   9  303.59   14.90
   6  -8  -9  284.77   14.15
  -6   8   8  314.56   15.41
   6  -8  -8  301.25   14.62
  -6   8   7  309.29   15.13
   6  -8  -7  310.73   15.64
  -6   8   6    7.14    7.89
   6  -8  -6   12.38    8.50
  -6   8   5  133.56    9.90
   6  -8  -5  141.40   10.60
  -6   8   4  272.39   13.87
   6  -8  -4  309.80   15.22
  -6   8   3   10.27    7.47
   6  -8  -3   17.47    8.08
  -6   8   2   78.08    8.83
   6  -8  -2   99.66    9.48
  -6   8   1  262.87   13.59
   6  -8  -1  297.24   14.57
  -6   8   0   14.94    7.57
   6  -8   0   16.44    7.66
  -6   8  -1 1395.36   54.17
   6  -8   1 1391.62   53.98
  -6   8  -2   53.84    7.85
   6  -8   2   82.38    8.13
  -6   8  -3  436.68   18.96
   6  -8   3  466.52   19.80
  -6   8  -4   20.22    6.96
   6  -8   4   18.68    6.91
   6  -8   4   18.59    6.86
  -6   8  -5  545.91   22.79
   6  -8   5  655.18   26.71
   6  -8   5  617.82   24.94
  -6   8  -6   12.00    7.38
   6  -8   6   25.31    6.49
   6  -8   6    8.97    6.82
  -6   8  -7  306.81   14.38
   6  -8   7  392.69   17.14
   6  -8   7  398.15   17.14
  -6   8  -8   17.51    6.91
   6  -8   8   11.21    7.38
   6  -8   8   10.74    6.21
   6  -8   9   46.28    6.72
   6  -8   9   39.46    7.89
   6  -8  10   23.91    6.58
   6  -8  10   18.96    8.17
   6  -8  11   52.68    7.43
   6  -8  11   72.43    9.11
   6  -8  12   11.39    7.57
   6  -8  12   19.05    8.13
  -6   7  13  714.02   29.09
   6  -7 -13  648.65   26.20
  -6   7  12   89.61    9.11
   6  -7 -12   85.18    8.50
  -6   7  11  197.40   12.09
   6  -7 -11  191.00   11.02
  -6   7  10  159.48   10.69
   6  -7 -10  145.70   10.27
  -6   7   9  479.60   20.78
   6  -7  -9  463.30   20.22
  -6   7   8  716.83   29.33
   6  -7  -8  670.59   27.55
  -6   7   7  308.26   14.94
   6  -7  -7  301.11   15.22
  -6   7   6 1308.50   51.04
   6  -7  -6 1351.00   52.63
  -6   7   5    2.15    7.05
   6  -7  -5   17.56    8.08
  -6   7   4   64.07    8.03
   6  -7  -4   63.14    8.64
  -6   7   3  420.34   18.59
   6  -7  -3  426.13   18.91
  -6   7   2 1061.46   41.80
   6  -7  -2 1040.92   40.91
  -6   7   1   46.00    7.38
   6  -7  -1   51.28    7.47
  -6   7   0 1414.97   54.87
   6  -7   0 1442.53   55.66
  -6   7  -1   39.23    6.54
   6  -7   1   46.70    7.00
  -6   7  -2  691.61   27.74
   6  -7   2  752.32   29.89
  -6   7  -3   55.66    6.91
   6  -7   3   59.17    6.68
  -6   7  -4  527.70   21.71
   6  -7   4  595.41   24.00
   6  -7   4  647.71   26.24
  -6   7  -5   15.41    6.40
   6  -7   5    6.30    6.26
   6  -7   5   15.18    5.79
  -6   7  -6   13.50    6.21
   6  -7   6    5.46    6.30
   6  -7   6   19.29    5.56
  -6   7  -7   50.11    6.63
   6  -7   7   77.05    6.77
   6  -7   7   58.28    6.86
   6  -7   8  671.53   26.66
   6  -7   8  620.63   25.17
   6  -7   9   33.44    6.21
   6  -7   9   23.86    7.75
   6  -7  10  147.57    8.69
   6  -7  10  131.22    9.71
   6  -7  11   44.27    6.49
   6  -7  11   33.39    8.13
  -6   6  14  335.81   15.69
   6  -6 -14  324.56   14.66
  -6   6  13  677.60   27.79
   6  -6 -13  682.74   27.69
  -6   6  12  249.18   13.31
   6  -6 -12  295.18   14.24
  -6   6  11  492.21   21.48
   6  -6 -11  503.41   21.43
  -6   6  10   24.05    8.36
   6  -6 -10   17.98    7.94
  -6   6   9  465.59   20.64
   6  -6  -9  482.87   21.25
  -6   6   8  760.72   31.01
   6  -6  -8  796.68   32.08
  -6   6   7 1564.88   60.76
   6  -6  -7 1413.10   55.01
  -6   6   6    1.31    7.14
   6  -6  -6   16.86    7.61
  -6   6   5  575.33   23.82
   6  -6  -5  540.30   22.88
  -6   6   4   10.97    7.00
   6  -6  -4    4.95    7.24
  -6   6   3 1359.87   52.68
   6  -6  -3 1331.85   51.65
  -6   6   2   17.37    6.54
   6  -6  -2   22.46    6.82
  -6   6   1  247.18   12.09
   6  -6  -1  252.78   12.33
  -6   6   0   24.47    6.16
   6  -6   0   33.02    6.30
  -6   6  -1  509.95   20.83
   6  -6   1  503.88   20.55
  -6   6  -2  605.22   24.19
   6  -6   2  647.71   25.68
  -6   6  -3  142.52    7.89
   6  -6   3  161.67    8.45
   6  -6   3  153.92    8.13
  -6   6  -4   12.70    5.56
   6  -6   4   14.24    6.07
   6  -6   4   11.49    4.95
  -6   6  -5   35.16    5.51
   6  -6   5   53.00    5.00
   6  -6   5   39.09    6.26
   6  -6   6    2.10    5.51
   6  -6   6    5.32    4.48
   6  -6   7   12.52    4.48
   6  -6   7    5.70    6.12
   6  -6   8   -4.34    6.44
   6  -6   8    4.02    4.67
   6  -6   9   22.56    5.18
   6  -6   9   12.70    7.05
  -6   5  15  226.96   12.19
   6  -5 -15  214.58   10.97
  -6   5  14  473.06   20.45
   6  -5 -14  493.14   20.83
  -6   5  13    5.32    8.41
   6  -5 -13   13.45    7.38
  -6   5  12   22.04    8.55
   6  -5 -12   27.23    7.99
  -6   5  11  211.08   12.47
   6  -5 -11  234.15   12.75
  -6   5  10 1013.83   40.35
   6  -5 -10  970.87   38.76
  -6   5   9   53.14    8.83
   6  -5  -9   54.36    8.59
  -6   5   8  749.52   30.77
   6  -5  -8  707.95   28.81
  -6   5   7  265.25   13.82
   6  -5  -7  250.26   12.61
  -6   5   6 2571.23   98.25
   6  -5  -6 2457.76   93.82
  -6   5   5   76.03    8.22
   6  -5  -5   74.25    7.43
  -6   5   4 1238.45   48.33
   6  -5  -4 1038.11   40.58
  -6   5   3  190.62   10.13
   6  -5  -3  196.70   10.04
  -6   5   2  603.35   24.33
   6  -5  -2  559.45   22.60
  -6   5   1  193.43    9.85
   6  -5  -1  173.95    8.92
  -6   5   0   20.41    5.37
   6  -5   0   22.00    4.90
  -6   5  -1  151.44    7.99
   6  -5   1  158.50    7.71
  -6   5  -2  235.08   10.41
   6  -5   2  242.23   10.32
  -6   5  -3  230.27    9.99
   6  -5   3  285.80   11.77
   6  -5   3  280.85   11.91
  -6   5  -4   71.22    4.76
   6  -5  11  220.14   10.32
   6  -5  11  213.37   11.07
  -6   4  16  157.42    9.76
   6  -4 -16  114.79    7.85
  -6   4  15   33.16    8.13
   6  -4 -15   15.18    6.54
  -6   4  14  108.95    9.76
   6  -4 -14  102.13    8.31
  -6   4  13  221.45   12.70
   6  -4 -13  203.05   11.58
  -6   4  12   16.06    8.55
   6  -4 -12   24.24    7.52
  -6   4  11   24.24    8.59
   6  -4 -11    9.67    7.75
  -6   4  10    4.20    8.27
   6  -4 -10   -0.70    7.29
  -6   4   9 2754.29  105.35
   6  -4  -9 2627.74  100.40
  -6   4   8  616.89   25.82
   6  -4  -8  584.67   24.38
  -6   4   7 2121.06   81.40
   6  -4  -7 2024.39   77.61
  -6   4   6   23.35    7.52
   6  -4  -6   22.18    6.63
  -6   4   5 2452.15   93.68
   6  -4  -5 2270.49   86.67
  -6   4   4  943.78   37.13
   6  -4  -4  836.84   32.97
  -6   4   3 1633.06   62.72
   6  -4  -3 1465.87   56.23
  -6   4   2   15.83    5.88
   6  -4  -2   15.13    5.42
  -6   4   1    2.24    5.18
   6  -4  -1    6.12    4.44
  -6   4   0   -2.38    4.62
   6  -4   0   -1.68    3.74
  -6   4  -1 2739.35  104.42
   6  -4   1 2742.15  104.47
  -6   4  -2 1406.10   55.01
   6  -4  12    2.38    5.74
   6  -4  12    6.49    6.02
   6  -4  13    7.47    6.49
   6  -4  13    3.08    6.49
  -6   3  16  101.10    9.01
  -6   3  16   78.69    8.31
   6  -3 -16   66.17    6.63
  -6   3  15  799.02   32.22
   6  -3 -15  724.76   29.05
  -6   3  14   89.52    9.57
   6  -3 -14   69.77    7.85
  -6   3  13  215.51   12.61
   6  -3 -13  201.51   11.44
  -6   3  12   22.46    8.59
   6  -3 -12   17.65    7.47
  -6   3  11    8.50    7.85
   6  -3 -11   10.55    7.61
  -6   3  10  543.57   23.30
   6  -3 -10  492.67   20.97
  -6   3   9 1004.02   39.88
   6  -3  -9  921.37   36.61
  -6   3   8 1101.62   43.48
   6  -3  -8 1019.90   39.97
  -6   3   7   -4.06    7.80
   6  -3  -7    7.00    6.16
  -6   3   6 4795.96  181.75
   6  -3  -6 4430.78  167.98
  -6   3   5  836.84   33.11
   6  -3  -5  735.04   29.14
  -6   3   4  221.77   10.93
   6  -3  -4  168.35    8.92
  -6   3   3 1067.53   41.38
   6  -3  -3  905.02   35.12
  -6   3   2 1061.93   41.05
   6  -3  -2  925.10   35.68
  -6   3   1 1063.33   40.91
   6  -3  -1  865.80   33.30
  -6   3   0  514.15   20.13
  -6   3   0  475.86   18.87
   6  -3   0  431.64   16.86
  -6   2  17    1.17    6.96
  -6   2  17   13.08    7.00
   6  -2 -17    8.73    6.21
  -6   2  16  218.27   12.09
  -6   2  16  229.57   12.38
   6  -2 -16  216.17   11.21
  -6   2  15  421.22   19.24
  -6   2  15  363.55   16.81
   6  -2 -15  346.79   15.46
  -6   2  14  341.04   16.44
  -6   2  14  347.77   16.72
   6  -2 -14  289.53   14.06
   6  -2 -13  531.90   22.37
  -6   2  12   46.23    8.83
   6  -2 -12   24.98    7.52
  -6   2  11  612.69   25.78
   6  -2 -11  536.57   22.51
  -6   2  10   -0.79    7.99
   6  -2 -10   -0.61    6.82
  -6   2   9  618.29   25.73
   6  -2  -9  587.00   24.24
  -6   2   8   71.92    8.45
   6  -2  -8   60.10    6.86
  -6   2   7 1780.62   68.55
   6  -2  -7 1554.60   59.73
  -6   2   6  568.79   23.26
   6  -2  -6  506.68   20.87
  -6   2   5 1019.43   39.79
   6  -2  -5  850.38   33.34
  -6   2   4 1150.19   44.55
   6  -2  -4  944.25   36.66
  -6   2   3 1246.39   47.96
  -6   2   3 1163.27   45.06
   6  -2  -3 1005.42   38.76
  -6   2   2   20.17    4.58
  -6   2   2   18.12    5.42
   6  -2  -2   12.75    4.25
  -6   2   1  889.14   34.23
  -6   2   1  908.29   35.07
   6  -2  -1  760.72   29.23
  -6   2   0 1126.84   48.10
  -6   2  -9   91.67    5.51
  -6   2 -10  230.27   10.46
  -6   2 -11   57.21    6.02
  -6   2 -12    2.10    6.07
  -6   2 -13   11.11    7.19
  -6   1  17  115.35    8.55
  -6   1  17  129.22    9.11
   6  -1 -17  120.86    8.03
  -6   1  16  170.82   11.02
  -6   1  16  156.16   10.13
   6  -1 -16  160.41    9.62
  -6   1  15   42.40    8.59
  -6   1  15   34.56    8.83
   6  -1 -15   28.86    7.29
  -6   1  14  507.15   22.04
  -6   1  14  528.63   22.84
   6  -1 -14  544.97   23.02
  -6   1  13   14.66    8.59
  -6   1  13   11.53    8.59
   6  -1 -13    6.21    7.33
  -6   1  12  969.93   38.57
  -6   1  12 1017.10   40.58
   6  -1 -12 1046.52   41.28
  -6   1  11   -0.42    8.55
  -6   1  11   -8.45    8.27
   6  -1 -11   -8.92    7.66
  -6   1  10  189.83   12.42
  -6   1  10  195.71   11.91
   6  -1 -10  204.77   11.58
  -6   1   9  207.53   12.38
  -6   1   9  203.00   11.25
   6  -1  -9  216.68   11.63
   6  -1  -8  297.38   13.96
  -6   1   7   32.92    6.96
  -6   1   7   34.23    7.61
   6  -1  -7   56.04    6.91
   6  -1  -6 3798.01  144.02
  -6   1   5  344.92   15.69
  -6   1   5  296.54   13.54
   6  -1  -5  274.36   12.70
  -6   1   4  299.34   13.36
  -6   1   4  270.71   12.98
   6  -1  -4  274.82   12.38
  -6   1   3  880.74   34.51
  -6   1   3  798.08   31.15
   6  -1  -3  727.57   28.39
  -6   1   2   99.42    6.16
  -6   1   2  101.85    6.96
   6  -1  -2   73.78    5.14
  -6   1   1  707.95   27.51
  -6   1   1  735.51   28.44
  -6   1  -6  135.47    6.02
  -6   1  -7  291.35   11.95
  -6   1  -8  236.11   10.27
   6  -1   8  226.96    9.95
   6  -1   8  229.57   10.09
  -6   1  -9  514.62   20.55
   6  -1   9  467.45   18.82
   6  -1   9  420.20   17.14
  -6   1 -10   29.00    5.56
   6  -1  10   16.90    5.51
   6  -1  10   21.76    5.88
  -6   1 -11  234.10   11.30
  -6   1 -12   -7.43    6.86
   6  -1  12    4.67    6.86
   6  -1  12   -0.93    6.12
  -6   0  17   80.79    8.13
  -6   0  17  100.68    8.50
   6   0 -17   80.09    7.29
  -6   0  16   18.40    7.80
  -6   0  16   11.63    8.64
   6   0 -16    2.71    6.54
  -6   0  15   75.79    9.76
  -6   0  15   57.72    8.87
   6   0 -15   75.51    7.99
  -6   0  14   11.44    9.34
  -6   0  14    2.48    8.45
   6   0 -14   -3.55    7.24
  -6   0  13  234.94   13.40
  -6   0  13  230.37   13.36
   6   0 -13  226.02   12.33
  -6   0  12  509.48   22.28
  -6   0  12  508.08   22.04
   6   0 -12  503.88   21.48
  -6   0  11  111.52    9.48
  -6   0  11  115.25   10.27
   6   0 -11  107.55    8.78
  -6   0  10   56.18    9.01
  -6   0  10   37.87    7.80
   6   0 -10   43.80    7.66
  -6   0   9  213.23   11.49
  -6   0   9  195.43   11.77
   6   0  -9  202.30   10.97
  -6   0   8 1049.32   41.52
  -6   0   8 1072.67   42.08
   6   0  -8 1055.39   41.28
  -6   0   7  699.55   28.53
  -6   0   7  684.14   27.69
   6   0  -7  595.41   24.24
  -6   0   6  799.95   31.85
  -6   0   6  853.19   34.09
   6   0  -6  718.23   28.63
  -6   0   5 4950.07  187.59
  -6   0   5 4758.60  180.44
   6   0  -5 4739.93  179.46
  -6   0   4   14.57    5.65
  -6   0   4   19.01    6.91
   6   0  -4   17.33    5.42
  -6   0   3  433.41   17.84
  -6   0   3  439.20   18.45
   6   0  -3  359.21   14.99
  -6   0   2  392.36   16.06
  -6   0   2  394.70   16.48
  -6   0   1  138.98    7.00
  -6   0   1  139.72    7.57
  -6   0   0 1613.91   61.64
  -6   0   0 1520.51   58.19
   6   0   2 1501.37   59.63
   6   0   3   80.23    3.92
  -6   0  -4  668.73   26.48
   6   0   4  747.65   29.47
  -6   0  -5  181.19    7.99
   6   0   5  251.85   11.30
  -6   0  -6  334.13   13.68
  -6   0  -7    3.08    4.44
  -6   0  -8  677.13   26.66
   6   0   8  590.27   23.54
   6   0   8  607.08   24.05
  -6   0  -9   49.69    6.21
   6   0   9   24.75    5.74
   6   0   9   42.50    6.16
  -6   0 -10  379.33   16.20
  -6   0 -11   -3.92    6.86
   6   0  11    8.59    6.44
   6   0  11   10.04    6.86
  -6   0 -12  213.83   11.39
  -6  -1  17   -2.43    7.85
  -6  -1  17    1.54    7.57
   6   1 -17    1.91    6.16
  -6  -1  16   72.71    9.11
  -6  -1  16   86.07    9.06
   6   1 -16   70.52    7.29
  -6  -1  15   61.18    9.57
  -6  -1  15   66.22    8.73
   6   1 -15   74.62    8.17
  -6  -1  14  274.68   14.20
  -6  -1  14  261.23   14.24
   6   1 -14  280.10   13.82
  -6  -1  13   24.42    8.78
  -6  -1  13   14.10    7.89
   6   1 -13   18.21    7.47
  -6  -1  12   51.70    8.78
  -6  -1  12   54.92    9.34
   6   1 -12   35.16    7.89
  -6  -1  11   46.00    9.25
  -6  -1  11   48.89    8.83
   6   1 -11   51.74    7.75
  -6  -1  10  453.07   19.80
  -6  -1  10  468.39   20.87
   6   1 -10  431.82   18.82
  -6  -1   9 1525.18   59.40
  -6  -1   9 1531.72   59.40
   6   1  -9 1512.57   58.37
  -6  -1   8 1762.41   67.85
  -6  -1   8 1700.30   65.80
   6   1  -8 1726.92   66.31
  -6  -1   7 1720.85   66.41
  -6  -1   7 1675.55   64.49
   6   1  -7 1669.48   64.16
  -6  -1   6  579.06   23.96
  -6  -1   6  580.93   23.68
   6   1  -6  517.89   21.39
  -6  -1   5 3187.19  121.14
  -6  -1   5 3371.65  128.33
   6   1  -5 3034.02  115.25
  -6  -1   4 1091.35   42.64
  -6  -1   4 1111.90   43.10
  -6  -1   3 1025.04   39.79
  -6  -1   3 1068.93   41.70
   6   1  -3 1084.35   42.36
  -6  -1   2   -7.24    5.98
  -6  -1   2    4.58    4.90
   6   1  -2   -4.53    6.30
  -6  -1   1  277.11   12.52
  -6  -1   1  285.89   12.24
   6   1  -1  344.17   14.94
  -6  -1   0   74.48    5.37
  -6  -1   0   69.44    5.98
   6   1   0   75.84    6.54
  -6  -1  -1  827.50   31.94
  -6  -1  -1  822.83   32.04
   6   1   1  971.33   37.59
  -6  -1  -2    3.69    4.72
  -6  -1  -2    7.61    3.74
   6   1   2   12.24    5.04
  -6  -1  -3  324.37   13.64
   6   1   3  355.52   14.94
  -6  -1  -4    9.34    4.72
   6   1   4   12.05    5.28
  -6  -1  -5   76.31    6.07
   6   1   5   81.54    6.82
  -6  -1  -6  137.01    7.89
   6   1   6  152.94    8.73
  -6  -1  -7 1498.10   57.58
   6   1   7 1309.90   50.53
  -6  -1  -8   37.17    6.44
   6   1   8   24.75    6.12
  -6  -1  -9 1009.16   39.46
   6   1   9  874.20   34.32
  -6  -1 -10  187.17   10.32
   6   1  10  150.09    8.78
   6   1  10  131.13    8.36
  -6  -1 -11  566.92   23.58
  -6  -2  17  233.40   12.05
  -6  -2  17  216.59   11.77
   6   2 -17  187.92    9.85
  -6  -2  16  103.67    9.53
  -6  -2  16   82.70    9.29
   6   2 -16   77.61    7.47
  -6  -2  15   15.50    8.03
  -6  -2  15   13.87    8.78
   6   2 -15   20.50    6.96
  -6  -2  14   -3.13    8.45
  -6  -2  14    2.80    8.41
   6   2 -14   -3.60    7.14
  -6  -2  13  369.48   17.23
  -6  -2  13  362.62   17.37
   6   2 -13  366.68   16.72
  -6  -2  12   -3.83    8.36
  -6  -2  12    4.44    8.55
   6   2 -12   -5.18    7.52
  -6  -2  11   34.28    8.78
  -6  -2  11   26.85    7.99
   6   2 -11   24.24    7.43
  -6  -2  10  418.79   18.82
  -6  -2  10  423.09   19.52
   6   2 -10  416.32   18.26
  -6  -2   9   78.08    9.20
  -6  -2   9   57.44    8.17
   6   2  -9   57.16    7.52
  -6  -2   8  243.81   12.56
  -6  -2   8  292.29   14.66
   6   2  -8  245.87   12.38
  -6  -2   7    2.71    6.63
  -6  -2   7    1.77    7.57
   6   2  -7    2.71    6.07
  -6  -2   6 1578.42   60.85
  -6  -2   6 1774.55   68.41
   6   2  -6 1506.50   58.56
   6   2  -6 1657.81   63.60
  -6  -2   5  116.89    8.22
  -6  -2   5  118.80    9.71
   6   2  -5  119.78    9.15
  -6  -2   4  298.45   13.40
  -6  -2   4  296.30   14.34
   6   2  -4  325.12   15.32
  -6  -2   3   33.16    5.93
  -6  -2   3   24.52    6.96
   6   2  -3   19.01    6.86
  -6  -2   2  706.09   28.30
  -6  -2   2  722.43   28.44
   6   2  -2  785.94   31.38
  -6  -2   1  186.47   10.32
  -6  -2   1  198.89    9.57
   6   2  -1  200.10   10.69
  -6  -2   0   67.81    6.96
  -6  -2   0   68.97    5.74
   6   2   0   85.46    7.19
  -6  -2  -1    9.06    4.58
  -6  -2  -1    8.22    6.07
   6   2   1   22.23    5.98
  -6  -2  -2  702.35   27.93
   6   2   2  807.42   31.85
  -6  -2  -3   28.86    6.26
   6   2   3   37.36    6.54
  -6  -2  -4 1617.18   62.06
   6   2   4 1782.03   68.37
  -6  -2  -5  976.94   38.11
   6   2   5 1050.26   40.95
  -6  -2  -6   13.40    6.02
   6   2   6   25.50    6.21
  -6  -2  -7   35.68    6.86
   6   2   7   39.18    6.63
  -6  -2  -8  420.76   18.31
   6   2   8  391.94   16.90
  -6  -2  -9   98.81    8.64
   6   2   9   69.53    7.38
  -6  -2 -10  119.36    8.92
   6   2  10  111.56    8.13
  -6  -2 -11  287.48   13.92
   6   2  11  227.61   11.44
  -6  -3  17    3.78    7.61
  -6  -3  17   13.64    7.29
   6   3 -17    3.78    6.12
  -6  -3  16  106.61    9.06
  -6  -3  16  125.48   10.13
   6   3 -16  108.48    8.27
  -6  -3  15   61.36    8.97
  -6  -3  15   35.02    9.39
   6   3 -15   54.50    7.57
  -6  -3  14  586.07   24.75
  -6  -3  14  582.80   24.47
   6   3 -14  582.80   24.33
  -6  -3  13  236.34   12.89
  -6  -3  13  235.74   13.64
   6   3 -13  221.40   11.86
  -6  -3  12   30.77    8.08
  -6  -3  12   50.29    9.25
   6   3 -12   40.02    7.99
  -6  -3  11   28.11    8.41
  -6  -3  11   22.14    8.59
   6   3 -11   18.03    7.24
  -6  -3  10  638.37   26.62
  -6  -3  10  598.21   25.40
   6   3 -10  621.56   25.68
  -6  -3   9  121.79    9.01
  -6  -3   9  140.00   10.60
   6   3  -9  129.64    9.57
  -6  -3   8  357.43   17.19
  -6  -3   8  324.14   15.13
   6   3  -8  314.98   15.50
   6   3  -8  357.53   16.20
  -6  -3   7  349.87   16.62
  -6  -3   7  338.43   15.41
   6   3  -7  359.67   17.14
  -6  -3   6    7.19    6.63
  -6  -3   6   13.59    8.03
   6   3  -6   14.43    8.73
  -6  -3   5  302.19   13.92
  -6  -3   5  302.84   14.62
   6   3  -5  335.02   16.30
  -6  -3   4   -1.12    6.26
  -6  -3   4    7.66    7.99
   6   3  -4    5.09    8.13
  -6  -3   3   38.06    7.94
  -6  -3   3   51.00    6.82
   6   3  -3   76.63    8.55
  -6  -3   2   38.95    7.89
  -6  -3   2   42.26    6.30
   6   3  -2   53.66    8.22
  -6  -3   1   27.65    5.74
  -6  -3   1   23.44    7.33
   6   3  -1   12.19    7.24
  -6  -3   0  124.78    8.92
  -6  -3   0  129.40    7.85
   6   3   0  147.10    9.76
  -6  -3  -1 1283.75   49.83
   6   3   1 1432.72   55.43
  -6  -3  -2  850.38   33.76
   6   3   2  923.23   36.66
  -6  -3  -3 2077.63   79.53
   6   3   3 2322.80   88.87
  -6  -3  -4  280.05   13.45
   6   3   4  334.18   15.36
  -6  -3  -5 1363.60   52.86
   6   3   5 1435.05   55.48
  -6  -3  -6   83.40    7.99
   6   3   6  104.04    8.08
  -6  -3  -7  242.88   12.61
   6   3   7  248.58   12.24
  -6  -3  -8   -5.37    7.52
   6   3   8    4.81    6.72
  -6  -3  -9  174.00   10.93
   6   3   9  152.42    9.53
  -6  -3 -10  535.63   22.79
   6   3  10  420.06   18.12
  -6  -4  17  102.88    8.64
  -6  -4  17  101.29    8.41
   6   4 -17   76.73    6.77
  -6  -4  16   75.09    7.94
  -6  -4  16   80.79    8.73
   6   4 -16   45.86    6.86
  -6  -4  15  463.91   20.83
  -6  -4  15  472.12   20.50
   6   4 -15  438.50   18.82
  -6  -4  14  497.81   21.53
  -6  -4  14  488.94   21.67
   6   4 -14  470.72   20.17
  -6  -4  13  520.22   22.46
  -6  -4  13  509.95   22.42
   6   4 -13  520.22   21.90
  -6  -4  12  239.98   13.12
  -6  -4  12  262.03   14.52
   6   4 -12  233.68   12.61
  -6  -4  11  264.32   13.54
  -6  -4  11  298.73   15.78
   6   4 -11  280.52   13.96
  -6  -4  10  400.68   17.89
  -6  -4  10  422.20   19.52
  -6  -4   9   46.00    9.85
  -6  -4   9   49.50    8.59
   6   4  -9   53.56    9.11
  -6  -4   8   83.64    8.13
  -6  -4   8   72.99    9.71
   6   4  -8   79.99    9.95
  -6  -4   7   82.66    8.22
  -6  -4   7   68.18    9.34
   6   4  -7   69.30   10.04
  -6  -4   6  942.85   37.27
  -6  -4   6 1028.31   40.86
   6   4  -6 1096.95   43.66
  -6  -4   5   15.08    6.82
  -6  -4   5   12.98    8.92
   6   4  -5   26.15    9.01
  -6  -4   4  505.75   21.76
  -6  -4   4  485.67   20.55
   6   4  -4  548.24   23.35
  -6  -4   3    8.41    6.30
  -6  -4   3    5.23    7.99
   6   4  -3    4.48    8.13
  -6  -4   2   52.26    8.64
  -6  -4   2   59.03    7.24
   6   4  -2   81.16    9.20
  -6  -4   1  146.96   10.46
  -6  -4   1  164.29    9.67
   6   4  -1  171.71   10.74
  -6  -4   0   61.69    8.55
   6   4   0   62.44    8.50
  -6  -4  -1 1006.36   39.79
   6   4   1 1138.98   44.92
  -6  -4  -2 1727.39   66.69
   6   4   2 1919.79   73.97
  -6  -4  -3 1011.50   40.02
   6   4   3 1079.21   42.59
  -6  -4  -4  333.29   15.83
   6   4   4  390.82   17.56
  -6  -4  -5   44.69    8.50
   6   4   5   53.89    7.89
  -6  -4  -6  326.14   15.74
   6   4   6  313.86   14.85
  -6  -4  -7   14.10    7.94
   6   4   7   12.75    7.00
  -6  -4  -8   81.58    9.29
   6   4   8   88.68    8.45
  -6  -4  -9   49.87    8.45
   6   4   9   50.76    8.13
  -6  -5  17  155.18    9.48
  -6  -5  17  171.24   10.23
   6   5 -17  116.61    7.61
  -6  -5  16  653.78   26.57
  -6  -5  16  689.74   28.11
   6   5 -16  570.66   23.12
  -6  -5  15  138.65    9.71
  -6  -5  15  136.64   10.60
   6   5 -15  107.03    8.17
  -6  -5  14  245.87   12.89
  -6  -5  14  245.64   14.01
   6   5 -14  175.68   10.51
  -6  -5  13  379.75   18.17
  -6  -5  13  343.94   16.20
  -6  -5  12  156.49   10.27
  -6  -5  12  140.56   11.21
  -6  -5  11   48.19    8.27
  -6  -5  11   37.83    9.39
   6   5 -11   42.68    9.53
  -6  -5  10   10.93    9.25
  -6  -5  10    5.60    8.27
   6   5 -10   14.62    9.62
  -6  -5   9  592.61   24.61
  -6  -5   9  589.81   25.36
   6   5  -9  593.07   25.64
  -6  -5   8  133.28   11.25
  -6  -5   8  140.14    9.85
   6   5  -8  148.78   12.24
  -6  -5   7  523.03   22.23
  -6  -5   7  579.53   25.31
   6   5  -7  608.48   25.92
  -6  -5   6  387.23   17.09
  -6  -5   6  342.49   16.72
   6   5  -6  359.07   17.33
  -6  -5   5  716.83   29.14
  -6  -5   5  680.40   28.30
   6   5  -5  759.32   31.19
  -6  -5   4  137.15    9.57
  -6  -5   4  150.09   11.16
   6   5  -4  163.87   11.21
  -6  -5   3  349.40   15.88
  -6  -5   3  329.55   16.02
   6   5  -3  389.05   18.54
  -6  -5   2   79.62    9.29
  -6  -5   2  102.27    8.22
   6   5  -2  116.56   10.55
  -6  -5   1   39.79    8.69
  -6  -5   1   24.61    6.77
   6   5  -1   35.49    8.64
  -6  -5   0  179.14   11.67
   6   5   0  201.97   12.24
  -6  -5  -1  256.89   13.82
   6   5   1  267.44   14.10
  -6  -5  -2  106.57   10.04
   6   5   2  129.92   10.55
  -6  -5  -3   11.81    8.59
   6   5   3   28.49    7.94
  -6  -5  -4   44.69    8.73
   6   5   4   24.52    8.17
  -6  -5  -5   -1.59    8.55
   6   5   5    6.30    7.43
  -6  -5  -6    9.01    8.69
   6   5   6    0.84    7.61
  -6  -5  -7   55.38    9.11
   6   5   7   58.61    8.55
  -6  -5  -8   93.30   10.09
   6   5   8   70.28    8.55
  -6  -6  16  481.46   20.50
  -6  -6  16  452.70   19.29
  -6  -6  15  138.04   10.41
  -6  -6  15  110.54    9.15
  -6  -6  14  333.80   16.44
  -6  -6  14  286.87   14.29
  -6  -6  13  351.92   16.48
  -6  -6  13  342.26   16.81
  -6  -6  12  606.62   25.17
  -6  -6  12  632.30   26.81
   6   6 -12  610.35   26.29
  -6  -6  11   53.70    9.34
  -6  -6  11   41.00    8.41
   6   6 -11   49.41    9.90
  -6  -6  10    0.14    7.80
  -6  -6  10    4.90    9.01
   6   6 -10   -1.54    9.62
  -6  -6   9    9.48    7.89
  -6  -6   9    4.86    9.15
   6   6  -9   13.54    9.53
  -6  -6   8  153.03    9.95
  -6  -6   8  175.03   12.33
   6   6  -8  163.03   11.91
  -6  -6   7  173.49   10.83
  -6  -6   7  191.32   12.70
   6   6  -7  195.95   12.84
  -6  -6   6 1629.79   63.09
  -6  -6   6 1721.78   66.78
   6   6  -6 1864.68   72.43
  -6  -6   5  282.06   14.10
  -6  -6   5  273.84   14.48
   6   6  -5  295.74   15.36
  -6  -6   4  355.80   17.37
  -6  -6   4  330.02   15.13
   6   6  -4  378.54   18.07
  -6  -6   3   -2.10    6.91
  -6  -6   3   -4.48    8.83
   6   6  -3   -2.01    9.43
  -6  -6   2   91.53    8.22
  -6  -6   2   79.25    9.99
   6   6  -2   74.76   10.18
  -6  -6   1  124.55   11.07
   6   6  -1  142.80   11.44
  -6  -6   0    2.90    8.83
   6   6   0   10.97    8.87
  -6  -6  -1   21.11    9.48
   6   6   1   13.68    9.39
  -6  -6  -2   31.10    8.78
   6   6   2   37.41    8.83
  -6  -6  -3  244.09   13.68
   6   6   3  250.59   13.73
  -6  -6  -4   -3.04    8.87
   6   6   4    6.54    7.52
  -6  -6  -5   33.16    8.45
   6   6   5   53.14    9.01
  -6  -6  -6  197.21   12.80
   6   6   6  207.76   12.28
  -6  -6  -7   32.46    8.87
   6   6   7   40.44    8.08
  -6  -7  15   -5.51    7.99
  -6  -7  15   -0.65    7.05
  -6  -7  14   63.65    9.15
  -6  -7  14   65.47    8.08
  -6  -7  13  231.67   12.09
  -6  -7  13  251.47   13.92
   6   7 -13  258.29   14.52
  -6  -7  12   76.77    8.22
  -6  -7  12   86.25   10.23
   6   7 -12   84.34   10.55
  -6  -7  11  225.32   13.68
  -6  -7  11  214.30   12.09
   6   7 -11  220.00   13.45
  -6  -7  10   21.81    9.71
  -6  -7  10   22.88    7.94
   6   7 -10   13.96    9.67
  -6  -7   9  180.30   12.05
  -6  -7   9  170.68   11.02
   6   7  -9  198.80   13.12
  -6  -7   8   10.23    7.10
  -6  -7   8   11.35    9.15
   6   7  -8   -6.26    9.29
  -6  -7   7  587.94   24.56
  -6  -7   7  581.87   25.08
   6   7  -7  646.78   27.79
  -6  -7   6   29.70    7.14
  -6  -7   6   21.01    8.69
   6   7  -6   38.85    9.57
  -6  -7   5  270.62   13.59
  -6  -7   5  253.43   14.48
   6   7  -5  293.69   16.11
  -6  -7   4  657.99   27.88
  -6  -7   4  684.14   27.83
   6   7  -4  708.42   29.98
  -6  -7   3  139.91   11.35
  -6  -7   3  143.88    9.90
   6   7  -3  165.27   12.52
  -6  -7   2   23.35    7.24
  -6  -7   2   21.76    9.62
   6   7  -2   33.72    9.76
  -6  -7   1    5.84    9.85
   6   7  -1   15.92    9.29
  -6  -7   0  620.16   26.76
   6   7   0  632.30   26.62
  -6  -7  -1   37.22    9.53
   6   7   1   43.15    9.20
  -6  -7  -2    1.40    8.69
   6   7   2    7.75    8.45
  -6  -7  -3  174.05   11.91
   6   7   3  181.99   12.09
  -6  -7  -4  288.41   15.18
   6   7   4  281.59   14.66
  -6  -7  -5   79.99   10.93
   6   7   5   85.60    9.48
  -6  -8  14  266.88   12.84
  -6  -8  14  291.68   14.38
   6   8 -14  265.44   13.50
  -6  -8  13   96.01    8.45
  -6  -8  13   99.94    9.95
   6   8 -13   97.09    9.99
  -6  -8  12  307.56   14.52
  -6  -8  12  341.98   16.90
   6   8 -12  318.44   16.20
  -6  -8  11   -0.47    9.15
  -6  -8  11   -7.24    7.38
   6   8 -11  -12.89    9.85
  -6  -8  10  184.93   11.11
  -6  -8  10  201.93   12.84
   6   8 -10  187.22   12.94
  -6  -8   9   28.07    9.95
  -6  -8   9   34.93    7.75
   6   8  -9   40.72    9.99
  -6  -8   8  415.29   18.45
  -6  -8   8  416.97   19.66
   6   8  -8  398.76   19.43
  -6  -8   7  468.39   21.25
  -6  -8   7  481.93   20.83
   6   8  -7  539.84   24.24
  -6  -8   6 1797.90   69.77
  -6  -8   6 1874.49   72.20
   6   8  -6 2042.14   79.01
  -6  -8   5   -5.09    9.15
  -6  -8   5    2.38    6.82
   6   8  -5    2.19    9.39
  -6  -8   4  316.94   16.72
  -6  -8   4  308.73   14.48
   6   8  -4  330.11   16.95
  -6  -8   3   24.14    7.80
  -6  -8   3   30.54   10.32
   6   8  -3   41.94    9.39
  -6  -8   2  221.49   11.53
  -6  -8   2  221.21   13.68
   6   8  -2  249.51   14.24
  -6  -8   1    6.21    9.81
   6   8  -1   -4.90    9.06
  -6  -8   0   38.90    9.76
   6   8   0   37.31    9.53
  -6  -8  -1   79.34    9.57
   6   8   1   91.16   10.46
  -6  -8  -2   30.91    9.39
   6   8   2   45.53    8.97
  -6  -8  -3  509.95   22.74
   6   8   3  520.22   22.51
  -6  -9  13 1205.76   46.65
  -6  -9  13 1236.58   48.29
   6   9 -13 1201.09   46.89
  -6  -9  12   10.93    7.05
  -6  -9  12    5.65    8.73
   6   9 -12    3.04    8.55
  -6  -9  11  300.74   14.20
  -6  -9  11  325.91   16.20
   6   9 -11  339.97   16.86
  -6  -9  10   36.57    9.25
  -6  -9  10   37.97    7.47
   6   9 -10   45.76    9.57
  -6  -9   9  495.01   20.87
  -6  -9   9  458.07   20.59
   6   9  -9  536.10   23.54
  -6  -9   8   -5.42    9.62
  -6  -9   8    1.07    7.19
   6   9  -8  -19.85    9.48
  -6  -9   7    1.87    9.57
  -6  -9   7    9.43    7.10
   6   9  -7    1.17    9.53
  -6  -9   6   21.48    9.67
  -6  -9   6   27.18    7.29
   6   9  -6   58.19   10.04
  -6  -9   5  437.71   20.45
  -6  -9   5  399.04   17.61
   6   9  -5  475.39   21.48
  -6  -9   4   95.27   10.88
  -6  -9   4  108.71    8.69
   6   9  -4  131.55   11.86
  -6  -9   3   90.41    8.13
  -6  -9   3   81.21   10.65
   6   9  -3  122.21   11.21
  -6  -9   2   89.29    7.66
  -6  -9   2   80.18   10.04
   6   9  -2   94.94   10.09
  -6  -9   1   -9.43    9.53
   6   9  -1    8.31    9.29
  -6  -9   0   14.38    9.71
   6   9   0    8.50    8.73
  -6  -9  -1   10.41    9.43
   6   9   1   -1.45    9.25
  -6 -10  10  148.41    9.43
  -6 -10  10  120.39   10.27
   6  10 -10  151.96   10.88
  -6 -10   9   18.03    6.82
  -6 -10   9   31.24    9.01
   6  10  -9   31.57    9.06
  -6 -10   8  192.54   10.88
  -6 -10   8  178.20   11.81
   6  10  -8  216.45   13.03
  -6 -10   7  112.92    8.83
  -6 -10   7   97.09   10.23
   6  10  -7  103.58   10.79
  -6 -10   6   22.74    7.24
  -6 -10   6   22.98    9.81
   6  10  -6   22.18    8.59
  -6 -10   5    3.60    8.92
  -6 -10   5    8.87    6.49
   6  10  -5    5.42    8.64
  -6 -10   4   90.13    8.08
  -6 -10   4   66.55    9.85
   6  10  -4   75.84    9.71
  -6 -10   3   99.19   10.88
  -6 -10   3  102.55    8.55
   6  10  -3  104.75   10.88
  -6 -10   2   43.62    7.38
  -6 -10   2   21.25    9.25
   6  10  -2   34.84    9.62
  -7  13   0  150.04   11.02
   7 -13   0  165.50   11.02
  -7  13  -1  242.32   13.12
   7 -13   1  255.44   13.40
  -7  13  -2   42.54    8.69
   7 -13   2   38.39    8.45
  -7  12   5   28.72    8.83
   7 -12  -5   17.65    8.17
  -7  12   4   -3.74    8.08
   7 -12  -4    9.11    8.50
  -7  12   3    2.57    9.81
   7 -12  -3  -14.20    8.41
  -7  12   2  219.34   12.89
   7 -12  -2  250.82   13.96
  -7  12   1  165.69   11.16
   7 -12  -1  178.30   11.67
  -7  12   0  273.51   14.52
   7 -12   0  313.30   15.83
  -7  12  -1   -8.41    8.69
   7 -12   1    5.32    8.64
  -7  12  -2    6.68    8.50
   7 -12   2   10.55    8.69
  -7  12  -3    4.95    8.22
   7 -12   3    8.64    8.36
  -7  12  -4   -0.70    8.36
   7 -12   4   16.11    8.59
  -7  12  -5  217.10   12.70
   7 -12   5  240.92   12.94
   7 -12   5  247.78   12.84
  -7  12  -6   13.26    8.55
   7 -12   6   11.16    8.27
   7 -12   6   27.37    7.89
  -7  11   8   12.66    7.66
   7 -11  -8    6.86    7.14
  -7  11   7  184.93   11.63
   7 -11  -7  182.92   11.25
  -7  11   6  344.26   16.48
   7 -11  -6  365.93   17.09
  -7  11   5   -2.19    7.75
   7 -11  -5    5.74    8.59
  -7  11   4  237.70   13.22
   7 -11  -4  308.40   15.27
  -7  11   3   51.28    8.03
   7 -11  -3   65.99    9.62
  -7  11   2  796.21   32.78
   7 -11  -2  865.33   34.74
  -7  11   1  454.33   20.17
   7 -11  -1  519.29   22.14
  -7  11   0   46.19    8.73
   7 -11   0   41.28    8.87
  -7  11  -1  265.25   14.48
   7 -11   1  301.02   15.04
  -7  11  -2   13.82    8.17
   7 -11   2   13.08    8.13
  -7  11  -3  119.69    9.67
   7 -11   3  122.16   10.09
  -7  11  -4  150.51   10.23
   7 -11   4  183.85   11.11
  -7  11  -5    7.99    8.31
   7 -11   5   11.21    8.22
   7 -11   5   17.09    7.71
  -7  11  -6  125.62   10.04
   7 -11   6  171.15   10.41
   7 -11   6  141.87    9.85
  -7  11  -7   15.74    8.13
   7 -11   7   12.19    7.89
   7 -11   7   36.71    8.17
  -7  11  -8  206.36   11.95
   7 -11   8  295.28   14.15
   7 -11   8  252.13   12.75
  -7  10   9   99.37    9.01
   7 -10  -9   87.61    8.69
  -7  10   8   25.31    8.55
   7 -10  -8    1.12    7.14
  -7  10   7  220.00   12.33
   7 -10  -7  258.85   13.82
  -7  10   6   14.34    8.27
   7 -10  -6   15.88    8.64
  -7  10   5  494.07   21.29
   7 -10  -5  565.99   23.96
  -7  10   4  118.24    9.57
   7 -10  -4  147.05   10.46
  -7  10   3  572.53   24.28
   7 -10  -3  705.62   29.09
  -7  10   2    9.95    7.94
   7 -10  -2    2.71    8.41
  -7  10   1  481.00   21.20
   7 -10  -1  557.12   23.63
  -7  10   0   28.81    7.99
   7 -10   0   21.57    8.03
  -7  10  -1    2.15    7.99
   7 -10   1   11.86    8.41
  -7  10  -2    1.68    8.08
   7 -10   2    8.78    8.03
  -7  10  -3  169.98   10.60
   7 -10   3  183.29   11.02
  -7  10  -4    2.66    7.71
   7 -10   4    0.89    7.38
  -7  10  -5   33.34    8.41
   7 -10   5   61.04    8.55
   7 -10   5   41.75    7.00
  -7  10  -6    5.65    7.99
   7 -10   6    3.74    7.57
   7 -10   6    3.08    6.82
  -7  10  -7  188.20   11.39
   7 -10   7  233.96   11.77
   7 -10   7  227.70   12.09
  -7  10  -8   19.80    7.52
   7 -10   8   18.40    7.10
   7 -10   8   18.03    7.05
  -7  10  -9    8.08    7.52
   7 -10   9   11.07    7.19
   7 -10   9    9.39    7.71
  -7   9  11  133.09    9.62
   7  -9 -11  136.55    9.01
  -7   9  10  296.58   14.62
   7  -9 -10  300.32   14.52
  -7   9   9  241.99   12.89
   7  -9  -9  239.00   12.38
  -7   9   8  485.67   20.78
   7  -9  -8  522.56   22.04
  -7   9   7  354.77   16.48
   7  -9  -7  396.47   17.93
  -7   9   6  216.87   12.09
   7  -9  -6  235.22   13.03
  -7   9   5   44.46    8.69
   7  -9  -5   43.66    9.29
  -7   9   4   83.08    8.64
   7  -9  -4   87.23    9.34
  -7   9   3    8.08    7.99
   7  -9  -3    2.33    7.80
  -7   9   2   46.93    8.13
   7  -9  -2   48.43    8.78
  -7   9   1   12.89    7.43
   7  -9  -1    5.88    8.08
  -7   9   0  210.38   11.63
   7  -9   0  213.41   11.81
  -7   9  -1   27.18    7.89
   7  -9   1   17.61    7.75
  -7   9  -2  228.22   12.24
   7  -9   2  281.22   13.68
  -7   9  -3    2.01    7.05
   7  -9   3   -1.31    7.05
  -7   9  -4   79.01    7.99
   7  -9   4   94.57    8.87
   7  -9   4   99.33    8.22
  -7   9  -5   23.68    7.14
   7  -9   5   29.84    6.58
   7  -9   5   35.21    7.47
  -7   9  -6  425.33   18.31
   7  -9   6  584.20   23.72
   7  -9   6  567.39   23.40
  -7   9  -7   19.80    7.05
   7  -9   7   32.50    7.43
   7  -9   7   37.92    6.12
  -7   9  -8  279.49   13.26
   7  -9   8  413.24   17.98
   7  -9   8  433.83   18.12
   7  -9   9   52.44    6.72
   7  -9   9   42.40    7.89
  -7   8  12   12.89    7.57
   7  -8 -12   17.65    6.86
  -7   8  11  409.74   18.21
   7  -8 -11  391.01   17.33
  -7   8  10   39.04    7.99
   7  -8 -10   41.09    8.27
  -7   8   9  281.64   14.48
   7  -8  -9  263.99   13.22
  -7   8   8   36.89    7.94
   7  -8  -8   23.30    7.66
  -7   8   7 1874.49   72.29
   7  -8  -7 2001.04   77.05
  -7   8   6  790.61   31.99
   7  -8  -6  829.37   33.53
  -7   8   5   35.02    7.80
   7  -8  -5   33.48    8.45
  -7   8   4  147.57   10.46
   7  -8  -4  164.85   11.25
  -7   8   3  181.52   11.07
   7  -8  -3  204.77   12.00
  -7   8   2   59.21    8.03
   7  -8  -2   70.05    8.50
  -7   8   1  194.78   11.02
   7  -8  -1  220.75   12.19
  -7   8   0  271.65   13.36
   7  -8   0  313.07   14.71
  -7   8  -1  873.27   34.79
   7  -8   1  922.77   36.43
  -7   8  -2   15.13    6.68
   7  -8   2   24.70    6.82
  -7   8  -3  409.83   17.75
   7  -8   3  449.94   18.96
  -7   8  -4  234.33   11.67
   7  -8   4  258.43   12.33
   7  -8   4  250.35   11.86
  -7   8  -5  141.08    8.55
   7  -8   5  184.32    9.95
   7  -8   5  178.16    9.34
  -7   8  -6  235.13   11.39
  -7   8  -7  215.42   10.41
   7  -8  10   19.99    7.00
   7  -8  10   40.63    5.93
  -7   7  13   29.42    7.99
   7  -7 -13   35.12    7.33
  -7   7  12   18.63    8.27
   7  -7 -12    3.46    7.19
  -7   7  11   18.54    8.97
   7  -7 -11   18.07    7.33
  -7   7  10  246.99   13.59
   7  -7 -10  226.91   12.24
  -7   7   9   80.84    8.87
   7  -7  -9   86.21    8.64
  -7   7   8  266.65   13.50
   7  -7  -8  277.30   13.92
  -7   7   7  164.01   11.02
   7  -7  -7  150.14   10.46
  -7   7   6 1229.58   48.19
   7  -7  -6 1230.98   48.19
  -7   7   5   11.49    7.00
   7  -7  -5    8.22    7.61
  -7   7   4  736.91   29.89
   7  -7  -4  781.27   31.57
  -7   7   3    5.09    6.91
   7  -7  -3   -5.37    7.47
  -7   7   2 1424.31   55.20
   7  -7  -2 1523.78   58.79
  -7   7   1  131.88    9.01
   7  -7  -1  132.02    9.01
  -7   7   0 2031.86   77.85
   7  -7   0 2039.80   77.99
  -7   7  -1   18.45    6.49
   7  -7   1   13.54    6.26
  -7   7  -2   15.92    5.98
   7  -7   2   16.81    5.88
  -7   7  -3  146.35    8.78
   7  -7   3  175.87    8.92
   7  -7   3  183.81    9.99
  -7   7  -4   10.37    5.56
   7  -7   4   -3.50    6.16
   7  -7   4    6.12    5.09
  -7   7  -5  363.18   15.22
   7  -7   5  541.24   21.48
   7  -7   5  512.29   20.78
  -7   6  14   -0.33    8.08
   7  -6 -14   -2.10    6.58
  -7   6  13  305.22   15.08
   7  -6 -13  280.01   13.50
  -7   6  12   16.02    8.41
   7  -6 -12   20.87    7.38
  -7   6  11   59.54    8.92
   7  -6 -11   44.13    7.94
  -7   6  10   36.10    8.41
   7  -6 -10   57.53    8.78
  -7   6   9  410.20   18.87
   7  -6  -9  435.70   19.47
  -7   6   8   12.84    8.73
   7  -6  -8    3.22    7.80
  -7   6   7 1306.63   51.23
   7  -6  -7 1280.01   50.01
  -7   6   6  118.52    9.15
   7  -6  -6  102.88    8.73
  -7   6   5  933.51   36.99
   7  -6  -5  867.66   34.42
  -7   6   4   12.98    7.05
   7  -6  -4   13.36    6.40
  -7   6   3  983.01   38.76
   7  -6  -3  974.14   38.25
  -7   6   2 1183.81   46.00
   7  -6  -2 1177.28   45.67
  -7   6   1 1328.11   51.32
   7  -6  -1 1327.18   51.14
  -7   6   0  164.94    9.43
   7  -6   0  127.81    7.80
  -7   6  -1 1192.22   46.04
   7  -6   1 1234.25   47.40
  -7   6  -2  448.03   18.21
   7  -6   2  462.27   18.54
  -7   6  -3   33.81    4.72
   7  -6   3   49.55    5.32
   7  -6   3   48.33    4.25
  -7   6  -4  155.18    7.38
   7  -6  10  398.53   16.11
  -7   5  15    0.47    7.80
   7  -5 -15   -2.66    6.26
  -7   5  14  201.46   11.95
   7  -5 -14  173.30   10.18
  -7   5  13   61.78    8.50
   7  -5 -13   41.84    8.31
  -7   5  12   72.57    9.29
   7  -5 -12   71.82    8.17
  -7   5  11  207.34   12.38
   7  -5 -11  192.91   11.25
  -7   5  10  102.04    9.99
   7  -5 -10   97.09    9.43
  -7   5   9   46.47    9.01
   7  -5  -9   58.19    8.17
  -7   5   8   13.50    8.27
   7  -5  -8   18.40    7.05
  -7   5   7  329.93   15.78
   7  -5  -7  325.16   15.27
  -7   5   6 1207.16   47.31
   7  -5  -6 1196.42   46.61
  -7   5   5   56.41    7.85
   7  -5  -5   54.96    6.96
  -7   5   4 1161.87   45.34
   7  -5  -4 1071.74   41.75
  -7   5   3   82.10    7.05
   7  -5  -3   71.45    6.58
  -7   5   2  108.39    7.29
   7  -5  -2  102.36    6.72
  -7   5   1 1209.50   46.61
   7  -5  -1 1161.40   44.69
  -7   5   0 1057.26   41.09
   7  -5   0  893.81   34.56
  -7   5  -1  907.36   35.07
   7  -5   1  891.95   34.37
  -7   5  -2   45.81    3.69
   7  -5  12   43.52    4.76
  -7   4  16   79.81    8.36
   7  -4 -16   49.78    6.49
  -7   4  15    8.31    8.22
   7  -4 -15   -1.26    6.30
  -7   4  14    6.72    7.89
   7  -4 -14  -12.09    6.96
  -7   4  13   47.87    8.92
   7  -4 -13   35.12    7.43
  -7   4  12   -6.16    8.03
   7  -4 -12    6.30    7.24
  -7   4  11  297.98   15.13
   7  -4 -11  284.21   14.52
  -7   4  10   62.58    9.20
   7  -4 -10   46.19    7.66
  -7   4   9  422.20   19.10
   7  -4  -9  364.53   16.48
  -7   4   8  -11.63    8.55
   7  -4  -8   -0.84    6.86
  -7   4   7 1668.55   64.58
   7  -4  -7 1499.96   58.05
  -7   4   6  295.51   14.52
   7  -4  -6  255.07   12.47
  -7   4   5  421.88   18.31
   7  -4  -5  375.60   16.16
  -7   4   4  452.98   19.24
   7  -4  -4  406.23   17.09
  -7   4   3 1628.39   62.62
   7  -4  -3 1429.45   54.92
  -7   4   2  126.74    7.29
   7  -4  -2  101.66    6.21
  -7   4   1  700.48   27.37
   7  -4  -1  621.56   24.28
  -7   4   0 1226.78   47.21
   7  -4   0  888.21   34.18
  -7   3  16  540.30   22.65
  -7   3  16  570.19   23.91
   7  -3 -16  441.58   18.59
  -7   3  15    7.29    8.41
  -7   3  15  -11.58    8.13
   7  -3 -15    7.38    6.40
  -7   3  14  133.09   10.27
   7  -3 -14   94.05    8.41
  -7   3  13   -2.10    8.41
   7  -3 -13   -0.56    7.89
  -7   3  12  446.30   19.85
   7  -3 -12  372.70   16.81
  -7   3  11  280.57   14.66
   7  -3 -11  236.30   12.80
  -7   3  10  106.85    9.81
   7  -3 -10  101.52    8.87
  -7   3   9  180.49   11.25
   7  -3  -9  167.84   10.13
  -7   3   8 1086.68   42.87
   7  -3  -8 1005.42   39.69
  -7   3   7  111.38    9.34
   7  -3  -7   85.13    7.94
  -7   3   6 2144.41   82.10
   7  -3  -6 1894.57   72.57
  -7   3   5  608.02   24.84
   7  -3  -5  502.48   20.64
  -7   3   4  137.62    8.64
   7  -3  -4  105.73    6.91
  -7   3   3   -1.82    5.46
   7  -3  -3    2.71    4.53
  -7   3   2  891.01   34.51
  -7   3   2  951.72   37.08
   7  -3  -2  750.92   29.14
  -7   3   1 1861.41   71.12
  -7   3   1 1775.02   67.76
   7  -3  -1 1628.85   62.20
  -7   2  16   79.20    8.83
  -7   2  16   80.28    8.92
   7  -2 -16   68.97    7.05
  -7   2  15  549.64   23.44
  -7   2  15  558.52   23.96
   7  -2 -15  504.81   21.06
  -7   2  14  175.82   11.39
  -7   2  14  199.17   12.47
   7  -2 -14  191.32   11.35
  -7   2  13  278.42   14.66
  -7   2  13  298.83   14.85
   7  -2 -13  276.55   14.15
  -7   2  12  414.97   19.33
  -7   2  12  394.65   18.03
   7  -2 -12  351.83   16.30
  -7   2  11   -4.06    8.55
  -7   2  11    1.82    7.89
   7  -2 -11    8.64    7.33
  -7   2  10  130.71   10.18
  -7   2  10  140.80   10.46
   7  -2 -10  119.69    9.20
  -7   2   9  266.74   13.73
  -7   2   9  287.24   14.66
   7  -2  -9  260.49   13.03
  -7   2   8    9.81    7.43
  -7   2   8    2.76    7.89
   7  -2  -8   10.74    7.05
  -7   2   7  211.13   11.49
  -7   2   7  222.01   12.05
   7  -2  -7  193.75   10.55
  -7   2   6  416.37   18.03
  -7   2   6  380.31   17.05
   7  -2  -6  366.91   16.20
  -7   2   5   26.10    6.26
  -7   2   5   32.78    6.96
   7  -2  -5   21.06    5.93
  -7   2   4   15.04    6.12
  -7   2   4   17.00    5.70
   7  -2  -4   17.23    5.51
  -7   2   3  526.76   21.11
  -7   2   3  517.89   21.01
   7  -2  -3  409.27   16.72
  -7   2   2  212.01    9.53
  -7   2   2  232.51   10.74
   7  -2  -2  145.33    7.14
  -7   1  17    7.57    7.43
  -7   1  17    7.85    7.33
   7  -1 -17   10.55    6.21
  -7   1  16  167.27   10.97
  -7   1  16  188.06   11.77
   7  -1 -16  156.25    9.39
  -7   1  15   40.86    9.53
  -7   1  15   34.42    8.36
   7  -1 -15   42.78    7.05
  -7   1  14  739.71   30.49
  -7   1  14  737.84   30.31
   7  -1 -14  728.03   29.47
  -7   1  13  144.81   11.25
  -7   1  13  152.19   10.69
   7  -1 -13  143.55    9.99
  -7   1  12    7.19    8.73
  -7   1  12   11.91    7.57
   7  -1 -12   -3.04    7.05
  -7   1  11   20.97    8.73
  -7   1  11   38.43    8.73
   7  -1 -11   34.32    7.85
  -7   1  10    0.56    8.08
  -7   1  10   -3.18    8.50
   7  -1 -10    8.45    7.38
  -7   1   9  206.36   12.19
  -7   1   9  214.16   12.09
   7  -1  -9  215.00   11.49
  -7   1   8  180.96   11.30
  -7   1   8  180.68   10.65
   7  -1  -8  185.58   10.55
  -7   1   7  261.42   13.31
  -7   1   7  229.76   11.77
   7  -1  -7  214.39   11.25
  -7   1   6 1009.16   39.79
  -7   1   6 1059.13   41.42
   7  -1  -6 1028.31   40.02
  -7   1   5  119.64    7.94
  -7   1   5  108.39    8.27
   7  -1  -5  111.61    7.43
  -7   1   4  487.07   19.89
  -7   1   4  473.06   19.71
   7  -1  -4  420.24   17.37
  -7   1   3  344.17   14.76
  -7   1   3  333.80   14.10
   7  -1  -3  268.14   11.67
  -7   1   2  211.45    9.48
  -7   1   2  202.25    9.81
  -7   1 -11  411.00   16.62
   7  -1  11   41.42    5.42
  -7   0  17  201.60   11.63
  -7   0  17  178.72   10.83
   7   0 -17  171.90    9.39
  -7   0  16   62.90    8.78
  -7   0  16   56.37    8.73
   7   0 -16   38.01    7.00
  -7   0  15  655.18   27.13
  -7   0  15  700.95   29.19
   7   0 -15  674.80   27.37
  -7   0  14    6.86    8.78
  -7   0  14    2.10    8.50
   7   0 -14   -2.24    7.19
  -7   0  13   78.41    9.57
  -7   0  13   71.59    9.20
   7   0 -13   91.44    8.73
  -7   0  12   40.67    8.83
  -7   0  12   38.39    8.87
   7   0 -12   42.17    7.75
  -7   0  11   43.76    8.78
  -7   0  11   44.41    7.71
   7   0 -11   40.86    7.85
  -7   0  10  335.16   16.39
  -7   0  10  316.85   15.32
   7   0 -10  323.53   15.18
  -7   0   9  817.70   32.88
  -7   0   9  802.75   32.64
   7   0  -9  799.48   32.13
  -7   0   8  543.11   23.12
  -7   0   8  558.05   23.30
   7   0  -8  514.15   21.57
  -7   0   7    5.32    7.38
  -7   0   7   -0.09    6.54
   7   0  -7    3.27    6.26
  -7   0   6 1167.47   45.58
  -7   0   6 1145.05   44.64
   7   0  -6 1082.94   42.12
  -7   0   5  329.93   14.62
  -7   0   5  299.11   13.92
   7   0  -5  304.48   13.50
  -7   0   4  743.91   29.47
  -7   0   4  766.33   30.54
   7   0  -4  674.33   26.66
  -7   0   3   57.21    5.70
  -7   0   3   67.43    6.96
  -7   0   2 1727.39   65.89
  -7   0   2 1782.49   68.18
  -7   0   1  127.72    6.30
  -7   0   1  120.02    6.91
  -7   0  -7   29.51    2.99
  -7   0  -8  265.48   10.97
   7   0   8   26.20    4.11
  -7   0  -9  145.61    7.05
  -7   0 -10  122.21    6.72
  -7   0 -11    1.91    5.37
  -7  -1  17  195.15   11.16
  -7  -1  17  206.03   11.63
   7   1 -17  183.39    9.95
  -7  -1  16   46.65    8.17
  -7  -1  16   39.93    8.78
   7   1 -16   33.48    6.54
  -7  -1  15   75.75    8.78
  -7  -1  15   71.96   10.18
   7   1 -15   45.20    7.38
  -7  -1  14  732.24   30.03
  -7  -1  14  687.41   28.67
   7   1 -14  687.41   28.02
  -7  -1  13  296.02   14.71
  -7  -1  13  286.08   15.18
   7   1 -13  269.69   13.59
  -7  -1  12  102.36    9.25
  -7  -1  12  115.63   10.18
   7   1 -12   96.95    8.69
  -7  -1  11   11.91    8.13
  -7  -1  11    8.13    8.41
   7   1 -11   22.42    7.80
  -7  -1  10   27.23    7.89
  -7  -1  10   25.36    8.59
   7   1 -10   12.94    7.38
  -7  -1   9    4.62    7.47
  -7  -1   9    2.66    8.22
   7   1  -9   -2.24    6.96
  -7  -1   8  310.97   15.22
  -7  -1   8  306.86   14.62
   7   1  -8  288.60   13.68
  -7  -1   7 2180.37   83.73
  -7  -1   7 2266.29   86.77
   7   1  -7 2179.43   83.31
  -7  -1   6  328.20   14.85
  -7  -1   6  339.03   15.97
   7   1  -6  333.66   14.90
  -7  -1   5  806.02   31.90
  -7  -1   5  828.44   33.16
  -7  -1   4    4.76    5.93
  -7  -1   4   20.87    7.05
  -7  -1   3  311.20   13.59
  -7  -1   3  340.95   15.36
  -7  -1   2   23.91    4.95
  -7  -1   2   16.44    6.12
   7   1  -2   17.61    6.72
  -7  -1   1  355.10   15.27
  -7  -1   1  360.61   14.94
   7   1  -1  423.42   17.65
  -7  -1   0    8.73    4.34
  -7  -1   0   16.81    5.32
   7   1   0   17.84    5.65
  -7  -1  -1  787.81   30.45
  -7  -1  -1  810.22   31.57
   7   1   1  975.07   37.83
  -7  -1  -2   -0.28    3.32
  -7  -1  -2    6.86    4.30
   7   1   2    8.69    4.62
   7   1   3   39.09    4.53
   7   1   4  144.39    7.29
  -7  -1  -5  137.01    6.96
   7   1   5  156.35    7.61
  -7  -1  -6   34.42    4.30
   7   1   6   36.61    4.34
  -7  -1  -7  319.89   13.26
   7   1   7  370.27   15.64
  -7  -1  -8  109.60    6.63
  -7  -1  -9  160.27    8.59
  -7  -1 -10   36.28    6.26
  -7  -2  17  107.13    9.06
  -7  -2  17   89.05    9.01
   7   2 -17   71.12    6.82
  -7  -2  16  161.95   11.07
  -7  -2  16  155.37   10.93
   7   2 -16  110.49    8.13
  -7  -2  15   -3.32    9.15
  -7  -2  15   26.85    8.03
   7   2 -15    4.95    6.58
  -7  -2  14  632.30   26.76
  -7  -2  14  612.22   25.54
   7   2 -14  552.45   23.12
  -7  -2  13  328.53   16.11
  -7  -2  13  283.04   15.08
   7   2 -13  293.92   14.24
  -7  -2  12  737.37   30.26
  -7  -2  12  766.33   31.57
   7   2 -12  707.49   28.63
  -7  -2  11  315.54   15.55
  -7  -2  11  300.27   15.60
   7   2 -11  320.59   15.32
  -7  -2  10 1223.97   48.24
  -7  -2  10 1218.84   47.77
   7   2 -10 1251.06   48.85
  -7  -2   9  118.15   10.23
  -7  -2   9  108.43    9.11
   7   2  -9  101.29    8.78
  -7  -2   8  418.00   18.73
  -7  -2   8  473.06   20.83
   7   2  -8  415.25   18.21
  -7  -2   7  505.75   21.29
  -7  -2   7  491.27   21.67
   7   2  -7  533.30   22.14
  -7  -2   6  224.71   12.14
  -7  -2   6  229.29   11.95
  -7  -2   5   -5.88    6.54
  -7  -2   5    3.41    7.29
   7   2  -5    4.48    7.24
  -7  -2   4    6.72    6.07
  -7  -2   4    9.11    7.38
   7   2  -4   -2.52    7.99
  -7  -2   3   58.05    6.26
  -7  -2   3   51.84    7.47
   7   2  -3   63.14    8.13
  -7  -2   2   15.46    7.24
  -7  -2   2   35.44    5.51
   7   2  -2   33.44    7.43
  -7  -2   1  158.92    9.62
  -7  -2   1  161.16    8.36
   7   2  -1  200.62   10.88
  -7  -2   0  170.45    9.81
  -7  -2   0  167.04    8.41
   7   2   0  222.71   11.35
  -7  -2  -1   43.66    6.63
  -7  -2  -1   37.27    5.32
   7   2   1   65.80    7.75
  -7  -2  -2   91.67    6.02
  -7  -2  -2   81.96    7.33
   7   2   2  114.32    8.36
   7   2   3  276.41   12.98
  -7  -2  -4  265.90   12.05
   7   2   4  278.93   12.80
  -7  -2  -5  986.28   38.39
   7   2   5  994.68   38.71
  -7  -2  -6  683.67   27.27
   7   2   6  628.10   25.03
  -7  -2  -7  108.11    7.75
   7   2   7   96.71    7.29
  -7  -2  -8  164.47    9.67
   7   2   8  146.59    8.41
  -7  -2  -9  184.37   10.37
   7   2   9  156.72    8.50
  -7  -3  17  176.66   10.60
  -7  -3  17  199.54   11.39
   7   3 -17  136.78    8.59
  -7  -3  16  243.25   13.22
  -7  -3  16  275.90   13.92
   7   3 -16  206.32   10.79
  -7  -3  15  139.12   11.11
  -7  -3  15  152.66   10.88
   7   3 -15  124.31    9.01
  -7  -3  14  172.41   12.00
  -7  -3  14  183.57   11.39
   7   3 -14  154.25    9.90
  -7  -3  13  637.44   26.95
  -7  -3  13  621.56   26.06
   7   3 -13  599.15   24.84
  -7  -3  12   -2.15    9.15
  -7  -3  12   10.65    7.71
   7   3 -12    9.25    7.47
  -7  -3  11   68.32    9.15
  -7  -3  11   54.50    8.59
   7   3 -11   37.27    7.99
  -7  -3  10  549.18   23.30
  -7  -3  10  562.72   24.66
   7   3 -10  576.73   24.19
  -7  -3   9  721.96   29.37
  -7  -3   9  708.89   29.51
  -7  -3   8  167.70   10.37
  -7  -3   8  167.74   12.28
  -7  -3   7  129.54    9.39
  -7  -3   7  155.97   11.53
   7   3  -7  144.77   11.39
  -7  -3   6   18.82    7.80
  -7  -3   6   21.25    6.77
   7   3  -6   34.32    8.83
  -7  -3   5  577.66   23.82
  -7  -3   5  566.46   23.77
   7   3  -5  616.89   26.10
  -7  -3   4  122.40    9.62
  -7  -3   4  110.21    8.36
   7   3  -4  145.05   10.41
  -7  -3   3   37.17    7.75
  -7  -3   3   24.61    6.40
   7   3  -3   36.19    8.03
  -7  -3   2   46.33    7.94
  -7  -3   2   63.46    6.54
   7   3  -2   65.89    8.97
  -7  -3   1  375.13   16.72
  -7  -3   1  367.94   15.78
   7   3  -1  437.99   19.38
  -7  -3   0    0.37    5.28
  -7  -3   0    3.55    7.38
   7   3   0    4.58    7.57
  -7  -3  -1    9.25    7.29
  -7  -3  -1   12.61    5.42
   7   3   1    0.19    7.85
   7   3   2 1526.12   58.93
  -7  -3  -3  227.28   11.81
   7   3   3  291.77   13.78
  -7  -3  -4  145.47    9.57
   7   3   4  174.47    9.81
  -7  -3  -5  445.23   19.15
   7   3   5  448.78   18.87
  -7  -3  -6  130.38    8.97
   7   3   6  137.57    8.87
  -7  -3  -7    5.18    7.61
   7   3   7    0.98    5.98
  -7  -3  -8   63.74    8.13
   7   3   8   51.84    6.54
  -7  -4  17  326.66   15.27
  -7  -4  17  353.60   16.06
   7   4 -17  242.93   11.72
  -7  -4  16   74.90    8.50
  -7  -4  16   74.58    9.06
   7   4 -16   47.26    6.63
  -7  -4  15  128.98   10.18
  -7  -4  15   92.93    9.95
   7   4 -15   86.25    7.99
  -7  -4  14  303.03   15.13
  -7  -4  14  309.29   16.20
   7   4 -14  228.59   11.86
  -7  -4  13  276.46   14.06
  -7  -4  13  292.05   16.02
   7   4 -13  253.99   12.84
  -7  -4  12  371.68   17.37
  -7  -4  12  405.81   19.29
   7   4 -12  359.16   16.30
  -7  -4  11    5.04    7.80
  -7  -4  11  -15.55    9.39
  -7  -4  10  763.06   30.96
  -7  -4  10  822.83   33.62
  -7  -4   9  262.73   13.54
  -7  -4   9  253.57   14.24
   7   4  -9  238.86   14.15
  -7  -4   8   73.83    8.69
  -7  -4   8   69.67   10.46
   7   4  -8   66.08   10.41
  -7  -4   7   17.51    9.43
  -7  -4   7   19.29    7.24
   7   4  -7   25.87    8.83
  -7  -4   6  543.11   23.21
  -7  -4   6  531.43   22.37
   7   4  -6  596.81   25.82
  -7  -4   5  175.96   10.09
  -7  -4   5  178.58   12.05
   7   4  -5  192.35   12.56
  -7  -4   4 1222.57   47.49
  -7  -4   4 1357.07   53.05
   7   4  -4 1493.43   58.33
  -7  -4   3   55.76    9.29
  -7  -4   3   61.92    6.96
   7   4  -3   72.94    9.39
  -7  -4   2  446.44   18.77
  -7  -4   2  480.06   21.06
   7   4  -2  561.32   24.14
  -7  -4   1   86.44    7.19
  -7  -4   1   73.60    9.20
   7   4  -1  101.90    9.76
  -7  -4   0  773.80   30.73
  -7  -4   0  860.66   34.46
   7   4   0  973.20   38.95
  -7  -4  -1    1.03    5.65
  -7  -4  -1    5.51    8.03
   7   4   1    5.18    8.41
  -7  -4  -2   20.27    8.17
   7   4   2   12.84    7.75
  -7  -4  -3 1070.34   42.22
   7   4   3 1119.37   43.94
  -7  -4  -4   30.26    8.36
   7   4   4   31.99    7.29
  -7  -4  -5   20.41    8.27
   7   4   5   21.11    7.29
  -7  -4  -6   -0.75    8.03
   7   4   6    1.73    6.77
  -7  -4  -7  158.22   11.02
   7   4   7  167.09    9.90
  -7  -5  16  334.74   15.88
  -7  -5  16  303.08   14.52
  -7  -5  15  162.37   10.83
  -7  -5  15  187.50   12.05
  -7  -5  14   94.89    8.64
  -7  -5  14   86.63   10.41
  -7  -5  13  379.47   18.49
  -7  -5  13  358.97   16.62
  -7  -5  12   11.81    7.47
  -7  -5  12   27.27    9.99
  -7  -5  11   73.13    8.83
  -7  -5  11   69.02   10.27
  -7  -5  10   -4.86    9.25
  -7  -5  10    3.13    7.99
   7   5 -10    2.10    9.34
  -7  -5   9  394.42   18.63
  -7  -5   9  376.58   17.19
   7   5  -9  386.11   18.63
  -7  -5   8  200.10   11.16
  -7  -5   8  184.27   12.24
   7   5  -8  182.55   12.56
  -7  -5   7  544.51   23.02
  -7  -5   7  576.26   24.89
   7   5  -7  617.36   26.90
  -7  -5   6   51.09    7.66
  -7  -5   6   80.42   10.37
   7   5  -6   73.64   10.41
  -7  -5   5  255.02   14.43
  -7  -5   5  254.32   12.94
   7   5  -5  256.00   14.80
  -7  -5   4  261.33   14.48
  -7  -5   4  270.76   13.08
   7   5  -4  342.35   17.28
  -7  -5   3  138.28    9.06
  -7  -5   3  169.10   11.77
   7   5  -3  209.58   13.36
  -7  -5   2  172.04    9.99
  -7  -5   2  190.76   12.56
   7   5  -2  210.28   13.03
  -7  -5   1  481.46   20.27
  -7  -5   1  473.99   21.29
   7   5  -1  559.92   24.42
  -7  -5   0  593.54   24.28
  -7  -5   0  618.76   26.20
   7   5   0  673.40   28.30
  -7  -5  -1   19.47    9.06
   7   5   1   39.37    8.36
  -7  -5  -2  384.75   17.89
   7   5   2  411.79   18.59
  -7  -5  -3   37.41    8.73
   7   5   3   45.44    8.36
  -7  -5  -4   15.18    9.01
   7   5   4   24.47    8.03
  -7  -5  -5   14.80    8.55
   7   5   5   -0.37    7.52
  -7  -5  -6    9.85    8.97
   7   5   6   17.56    7.29
  -7  -6  15   75.84    9.43
  -7  -6  15   74.53    7.94
  -7  -6  14   52.12    8.31
  -7  -6  14   38.53    9.39
  -7  -6  13   58.28    8.41
  -7  -6  13   67.90    9.99
  -7  -6  12  289.53   15.78
  -7  -6  12  298.22   14.62
  -7  -6  11   22.98    9.99
  -7  -6  11   27.37    7.66
   7   6 -11   25.45    9.95
  -7  -6  10    0.98    9.20
  -7  -6  10    7.80    7.99
   7   6 -10    6.58    9.25
  -7  -6   9  151.07   11.58
  -7  -6   9  152.61   10.41
   7   6  -9  149.67   12.56
  -7  -6   8  369.34   16.95
  -7  -6   8  372.38   18.07
   7   6  -8  355.28   17.98
  -7  -6   7  202.39   11.53
  -7  -6   7  210.24   13.12
   7   6  -7  200.06   13.22
  -7  -6   6  702.82   28.67
  -7  -6   6  685.07   28.77
   7   6  -6  721.96   30.31
  -7  -6   5  368.55   16.62
  -7  -6   5  382.70   18.40
   7   6  -5  418.75   19.85
  -7  -6   4   71.22   10.97
  -7  -6   4   65.71    7.52
   7   6  -4  103.06   11.25
  -7  -6   3   10.97    7.10
  -7  -6   3    7.66    9.15
   7   6  -3   17.47    8.73
  -7  -6   2  349.31   15.78
  -7  -6   2  372.61   17.75
   7   6  -2  399.18   19.24
  -7  -6   1  229.94   11.67
  -7  -6   1  253.25   14.01
   7   6  -1  275.20   14.66
  -7  -6   0  310.03   16.25
  -7  -6   0  320.35   14.52
   7   6   0  317.69   15.88
  -7  -6  -1   31.10    9.67
   7   6   1   38.71    8.64
  -7  -6  -2    8.27    9.20
   7   6   2    7.10    8.36
  -7  -6  -3   98.95   10.41
   7   6   3  111.89   10.13
  -7  -6  -4   -8.27    9.25
   7   6   4   -3.13    8.41
  -7  -6  -5   77.38   10.32
   7   6   5   71.50    8.78
  -7  -7  14   26.06    7.43
  -7  -7  14   30.17    8.69
  -7  -7  12    8.08    7.19
  -7  -7  12   19.89    9.67
   7   7 -12   20.27    9.57
  -7  -7  11  326.70   15.27
  -7  -7  11  299.06   15.50
   7   7 -11  299.81   15.97
  -7  -7  10    2.57    7.61
  -7  -7  10   17.61    9.53
   7   7 -10    5.46    9.11
  -7  -7   9  612.69   26.34
  -7  -7   9  557.58   23.40
   7   7  -9  646.78   27.41
  -7  -7   8  137.11   11.30
  -7  -7   8  103.34    8.92
   7   7  -8  107.73   11.58
  -7  -7   7 1209.50   48.01
  -7  -7   7 1230.05   48.01
   7   7  -7 1416.84   55.90
  -7  -7   6   65.75    8.03
  -7  -7   6   49.31    9.67
   7   7  -6   77.99   11.21
  -7  -7   5  278.56   15.27
  -7  -7   5  287.85   13.92
   7   7  -5  341.55   17.51
  -7  -7   4  130.85    9.01
  -7  -7   4  123.47   11.63
   7   7  -4  153.13   12.38
  -7  -7   3  223.92   13.82
  -7  -7   3  207.44   11.11
   7   7  -3  247.92   14.62
  -7  -7   2  100.08   10.55
  -7  -7   2   97.32    8.17
   7   7  -2  119.55   11.11
  -7  -7   1   30.73    6.96
  -7  -7   1   37.22    9.67
   7   7  -1   40.81    9.57
  -7  -7   0  425.80   18.40
  -7  -7   0  412.02   19.61
   7   7   0  430.14   19.94
  -7  -7  -1  174.75   12.52
   7   7   1  239.98   14.06
  -7  -7  -2  143.37   11.63
   7   7   2  139.02   10.93
  -7  -7  -3    1.12    9.48
   7   7   3    7.89    8.31
  -7  -8  13   47.07    7.19
  -7  -8  13   58.70    9.81
   7   8 -13   66.64    9.20
  -7  -8  12  146.96   11.21
  -7  -8  12  133.00    9.20
   7   8 -12  148.08   11.16
  -7  -8  11   14.20    7.38
  -7  -8  11    9.81    9.67
   7   8 -11   27.46    9.39
  -7  -8  10  301.67   14.24
  -7  -8  10  307.60   15.92
   7   8 -10  327.22   16.86
  -7  -8   9   66.92    9.99
  -7  -8   9   56.32    7.71
   7   8  -9   86.58   10.79
  -7  -8   8  297.33   14.15
  -7  -8   8  260.25   14.29
   7   8  -8  325.26   17.05
  -7  -8   7  766.33   31.80
  -7  -8   7  746.25   30.07
   7   8  -7  866.73   35.54
  -7  -8   6  679.47   27.65
  -7  -8   6  742.04   30.87
   7   8  -6  847.58   34.88
  -7  -8   5   22.79    7.47
  -7  -8   5   12.19    9.76
   7   8  -5   18.87    9.25
  -7  -8   4  172.04   10.41
  -7  -8   4  160.60   12.19
   7   8  -4  162.14   11.63
  -7  -8   3   10.27    6.96
  -7  -8   3    6.86    9.53
   7   8  -3   14.15    9.81
  -7  -8   2   -0.33    6.77
  -7  -8   2   13.54    9.29
   7   8  -2   -2.19    9.53
  -7  -8   1   21.90    9.76
  -7  -8   1   11.95    7.14
   7   8  -1   33.16    9.62
  -7  -8   0   28.39   10.97
  -7  -8   0   40.44    6.68
   7   8   0   36.94    9.29
  -7  -8  -1  144.49   11.77
   7   8   1  195.57   12.56
  -7  -9  11  117.12    8.69
  -7  -9  11  101.94    9.95
   7   9 -11  119.92   10.83
  -7  -9  10   30.26    7.33
  -7  -9  10   34.09    9.85
   7   9 -10   26.24    9.20
  -7  -9   9    9.43    6.35
  -7  -9   9    5.79    9.67
   7   9  -9   -1.03    8.59
  -7  -9   8  286.96   15.36
  -7  -9   8  254.04   12.38
   7   9  -8  282.29   14.85
  -7  -9   7  224.01   11.72
  -7  -9   7  215.84   13.78
   7   9  -7  246.48   13.82
  -7  -9   6  191.18   10.55
  -7  -9   6  186.94   12.98
   7   9  -6  213.37   13.36
  -7  -9   5  509.48   22.84
  -7  -9   5  486.60   20.69
   7   9  -5  554.31   23.77
  -7  -9   4   43.85    7.47
  -7  -9   4   13.96    9.81
   7   9  -4   21.71    9.67
  -7  -9   3   24.33    7.52
  -7  -9   3   10.18   10.04
   7   9  -3   20.27    9.85
  -7  -9   2   19.89    6.68
  -7  -9   2    7.24   10.09
   7   9  -2    7.29    9.62
  -8  12   4   22.70    7.99
   8 -12  -4   35.82    8.45
  -8  12   3  155.65   11.25
   8 -12  -3  143.55   10.69
  -8  12   2    6.58    8.83
   8 -12  -2   -3.27    7.94
  -8  12   1  715.43   29.42
   8 -12  -1  841.98   33.81
  -8  12   0  143.32   10.32
   8 -12   0  168.58   11.07
  -8  12  -1  412.07   18.77
   8 -12   1  446.86   19.71
  -8  12  -2   25.36    8.92
   8 -12   2   31.24    8.69
  -8  12  -3   16.16    8.50
   8 -12   3   17.65    8.36
  -8  12  -4   -3.88    7.80
   8 -12   4    8.36    8.27
   8 -12   4   22.14    8.27
  -8  11   7  124.55    9.67
   8 -11  -7  102.32    9.20
  -8  11   6   64.12    8.64
   8 -11  -6   72.20    8.92
  -8  11   5   31.62    8.78
   8 -11  -5   41.05    8.55
  -8  11   4  292.52   14.99
   8 -11  -4  377.42   17.79
  -8  11   3    2.85    7.99
   8 -11  -3    0.75    8.83
  -8  11   2  527.23   22.93
   8 -11  -2  618.76   25.82
  -8  11   1    9.71    8.36
   8 -11  -1   -0.84    8.31
  -8  11   0  396.61   18.21
   8 -11   0  433.97   19.19
  -8  11  -1   12.47    8.41
   8 -11   1    3.36    8.13
  -8  11  -2   65.05    9.06
   8 -11   2   74.62    8.03
  -8  11  -3    2.66    8.13
   8 -11   3   -2.71    7.57
  -8  11  -4    4.95    8.08
   8 -11   4   17.89    7.80
   8 -11   4    9.53    7.47
  -8  11  -5    5.74    8.03
   8 -11   5   -8.50    7.43
   8 -11   5    5.98    7.85
  -8  11  -6   59.26    8.03
   8 -11   6   67.06    8.64
   8 -11   6   63.42    7.57
  -8  11  -7   16.44    7.80
   8 -11   7   19.10    7.99
   8 -11   7   30.35    7.29
  -8  10   9  693.48   28.16
   8 -10  -9  751.85   30.12
  -8  10   8   71.08    9.20
   8 -10  -8   65.38    8.03
  -8  10   7  375.46   17.42
   8 -10  -7  439.34   19.24
  -8  10   6  149.11   10.09
   8 -10  -6  175.45   11.67
  -8  10   5  782.67   31.76
   8 -10  -5  839.18   33.67
  -8  10   4   52.16    8.92
   8 -10  -4   75.75    8.69
  -8  10   3  478.20   20.97
   8 -10  -3  611.75   25.50
  -8  10   2   44.46    8.92
   8 -10  -2   54.73    8.50
  -8  10   1  298.69   15.27
   8 -10  -1  305.04   14.99
  -8  10   0  145.93   10.23
   8 -10   0  176.10   10.60
  -8  10  -1   -3.74    7.94
   8 -10   1    5.88    7.43
  -8  10  -2  199.08   11.44
   8 -10   2  221.91   11.58
  -8  10  -3   10.18    7.85
   8 -10   3   -5.04    6.96
  -8  10  -4   79.95    8.78
   8 -10   4   99.28    8.17
   8 -10   4   84.15    8.36
  -8  10  -5  142.43    9.39
   8 -10   5  155.32    9.43
   8 -10   5  165.64    9.71
  -8  10  -6    8.83    6.77
   8 -10   6   21.67    7.10
   8 -10   6   14.24    6.40
  -8  10  -7   28.35    7.00
  -8   9  10  502.48   21.53
   8  -9 -10  515.55   21.62
  -8   9   9   10.37    7.66
   8  -9  -9   -3.97    7.24
  -8   9   8  724.76   29.47
   8  -9  -8  837.31   33.67
  -8   9   7   63.42    8.13
   8  -9  -7   62.95    8.31
  -8   9   6   15.04    7.94
   8  -9  -6   11.53    7.43
  -8   9   5  577.20   24.24
   8  -9  -5  630.90   26.20
  -8   9   4  223.13   12.05
   8  -9  -4  257.45   13.22
  -8   9   3   12.28    7.66
   8  -9  -3    6.91    7.89
  -8   9   2  137.15   10.27
   8  -9  -2  173.86   10.74
  -8   9   1  104.70    9.25
   8  -9  -1  107.87    8.64
  -8   9   0  684.14   28.02
   8  -9   0  722.90   29.09
  -8   9  -1    3.74    7.05
   8  -9   1    8.36    6.68
  -8   9  -2  223.45   11.58
   8  -9   2  252.97   12.19
  -8   9  -3   23.30    6.54
   8  -9   3   30.12    7.71
   8  -9   3   21.43    6.35
  -8   9  -4   11.11    6.58
   8  -9   4   -7.14    6.02
   8  -9   4   -1.03    6.58
  -8   9  -5   12.61    6.30
   8  -9   5   14.06    5.84
   8  -9   5    4.39    7.29
  -8   9  -6   37.22    6.40
  -8   8  12   12.70    7.33
   8  -8 -12   14.20    6.86
  -8   8  11  378.59   17.28
   8  -8 -11  344.82   15.55
  -8   8  10   79.81    8.55
   8  -8 -10   82.10    8.22
  -8   8   9   79.20    8.97
   8  -8  -9   84.15    8.31
  -8   8   8   31.99    7.85
   8  -8  -8   32.97    7.29
  -8   8   7  850.38   34.14
   8  -8  -7  875.13   34.79
  -8   8   6   44.92    8.22
   8  -8  -6   40.49    7.80
  -8   8   5    4.34    7.66
   8  -8  -5    9.99    7.38
  -8   8   4   -0.28    7.33
   8  -8  -4    9.06    7.80
  -8   8   3  309.52   14.66
   8  -8  -3  372.56   16.86
  -8   8   2   70.98    8.27
   8  -8  -2   76.68    7.94
  -8   8   1  242.32   13.03
   8  -8  -1  216.22   11.58
  -8   8   0  260.95   12.94
   8  -8   0  235.08   11.81
  -8   8  -1  721.50   28.95
   8  -8   1  763.99   30.31
  -8   8  -2  387.97   16.48
   8  -8   2  429.02   17.89
  -8   8  -3  646.78   25.92
   8  -8   3  799.02   31.57
   8  -8   3  722.43   28.39
  -8   8  -4   57.91    6.07
  -8   8  -5   65.00    5.98
   8  -8   7    7.61    3.78
  -8   7  13    3.64    8.22
   8  -7 -13    5.00    7.38
  -8   7  12   -1.91    7.71
   8  -7 -12   -1.63    7.10
  -8   7  11   10.55    8.45
   8  -7 -11   -9.76    7.10
  -8   7  10  766.33   31.38
   8  -7 -10  716.36   29.00
  -8   7   9  111.66    9.25
   8  -7  -9  110.40    8.73
  -8   7   8    8.17    7.29
   8  -7  -8   11.39    7.75
  -8   7   7   36.66    7.47
   8  -7  -7   41.66    7.80
  -8   7   6  153.36   10.18
   8  -7  -6  151.21    9.71
  -8   7   5  355.38   16.25
   8  -7  -5  351.31   15.97
  -8   7   4  214.95   11.81
   8  -7  -4  223.17   11.44
  -8   7   3  217.01   11.58
   8  -7  -3  208.23   10.97
  -8   7   2  747.18   29.98
   8  -7  -2  775.20   30.77
  -8   7   1  878.87   34.70
   8  -7  -1  928.84   36.33
  -8   7   0  507.62   21.01
   8  -7   0  484.73   19.80
  -8   7  -1  834.04   32.83
   8  -7   1  860.66   33.67
  -8   7  -2  350.43   14.80
   8  -7   2  587.47   24.89
  -8   7  -3   42.82    5.18
  -8   7  -4   31.47    3.92
   8  -7   4   59.77    4.30
  -8   6  14   30.03    7.80
   8  -6 -14   21.95    6.63
  -8   6  13  299.11   15.13
   8  -6 -13  254.93   12.80
  -8   6  12   -3.13    7.71
   8  -6 -12   -0.23    7.24
  -8   6  11   55.48    8.87
   8  -6 -11   42.68    7.52
  -8   6  10   12.00    9.15
   8  -6 -10   13.12    7.89
  -8   6   9    0.05    9.11
   8  -6  -9    7.89    7.33
  -8   6   8  134.35   10.32
   8  -6  -8  147.66   10.32
  -8   6   7   39.83    8.36
   8  -6  -7   30.21    7.80
  -8   6   6  247.46   12.75
   8  -6  -6  244.47   12.47
  -8   6   5  135.71    9.57
   8  -6  -5  127.02    8.73
  -8   6   4  411.70   17.70
   8  -6  -4  402.45   17.23
  -8   6   3  190.25   10.32
   8  -6  -3  181.99    9.76
  -8   6   2  859.26   33.90
   8  -6  -2  850.85   33.34
  -8   6   1  267.72   12.38
   8  -6  -1  259.60   11.63
  -8   6   0  314.24   13.87
   8  -6   0  277.30   12.00
  -8   6  -1  362.66   14.90
   8  -6   1  373.31   15.08
  -8   6  -2  475.86   18.87
   8  -6   2  589.34   23.12
  -8   5  15  353.74   16.20
   8  -5 -15  251.19   12.14
  -8   5  14  227.10   12.33
   8  -5 -14  141.59    8.97
  -8   5  13   70.94    8.78
   8  -5 -13   51.42    7.52
  -8   5  12  117.31   10.04
   8  -5 -12  112.78    9.29
  -8   5  11   15.64    8.59
   8  -5 -11    4.30    7.10
  -8   5  10  859.72   34.79
   8  -5 -10  840.11   33.72
  -8   5   9  120.95   10.55
   8  -5  -9  124.03    9.57
  -8   5   8   35.16    8.45
   8  -5  -8   29.09    7.57
  -8   5   7   29.37    8.45
   8  -5  -7   16.25    7.14
  -8   5   6  152.19   10.32
   8  -5  -6  160.64   10.09
  -8   5   5  242.09   12.14
   8  -5  -5  225.70   11.25
  -8   5   4   64.44    7.05
   8  -5  -4   53.38    6.40
  -8   5   3   13.59    5.51
   8  -5  -3   19.29    5.51
  -8   5   2  261.75   11.81
   8  -5  -2  232.28   10.65
  -8   5   1  959.66   37.27
   8  -5  -1  915.30   35.40
  -8   5   0   59.82    4.81
   8  -5   0   41.94    3.83
  -8   4  15    6.02    7.94
  -8   4  15   -3.97    8.31
   8  -4 -15   -3.04    6.12
  -8   4  14    7.05    8.17
   8  -4 -14    4.30    6.58
  -8   4  13   47.82    8.50
   8  -4 -13   43.24    7.33
  -8   4  12  569.26   24.33
   8  -4 -12  509.02   21.62
  -8   4  11   91.67    9.76
   8  -4 -11   74.53    8.69
  -8   4  10  125.11   10.69
   8  -4 -10  109.37    8.83
  -8   4   9  258.52   13.73
   8  -4  -9  236.25   12.24
  -8   4   8  907.36   36.28
   8  -4  -8  820.96   32.78
  -8   4   7  304.52   14.90
   8  -4  -7  264.41   12.94
  -8   4   6  419.50   18.40
   8  -4  -6  358.79   15.74
  -8   4   5   32.36    7.33
   8  -4  -5   26.15    6.12
  -8   4   4    1.87    6.35
   8  -4  -4    4.53    5.18
  -8   4   3  292.47   12.98
   8  -4  -3  228.36   10.41
  -8   4   2   94.28    6.44
  -8   4   2  107.92    7.43
   8  -4  -2   71.26    5.93
  -8   4   1  209.91    9.81
  -8   4   1  198.56    8.92
   8  -4  -1  176.71    7.94
  -8   3  16  202.44   11.39
  -8   3  16  208.88   12.09
   8  -3 -16  162.47    9.34
  -8   3  15    5.70    8.17
  -8   3  15   16.20    8.78
   8  -3 -15    9.11    6.91
  -8   3  14  133.23   11.21
  -8   3  14  138.98   10.23
   8  -3 -14   95.03    8.27
  -8   3  13   34.93    8.41
  -8   3  13   44.64    9.81
   8  -3 -13   16.95    7.00
  -8   3  12   36.14    9.06
  -8   3  12   35.63    8.92
   8  -3 -12   31.66    7.61
  -8   3  11  573.93   24.47
  -8   3  11  642.11   26.76
   8  -3 -11  533.30   22.46
  -8   3  10  148.69   10.83
  -8   3  10  166.11   11.21
   8  -3 -10  131.83    9.53
   8  -3  -9  889.61   35.30
   8  -3  -8  457.79   19.47
  -8   3   7  179.23   10.93
  -8   3   7  166.90   10.37
   8  -3  -7  124.45    8.55
  -8   3   6   38.67    7.52
  -8   3   6   42.50    7.80
   8  -3  -6   28.30    6.49
  -8   3   5  114.79    8.78
  -8   3   5  121.37    8.73
   8  -3  -5  102.41    7.57
  -8   3   4   -1.82    6.21
  -8   3   4    6.30    6.40
   8  -3  -4    1.82    5.37
   8  -3  -3   79.71    5.65
  -8   3   2  992.35   38.53
  -8   3   2 1046.05   40.39
   8  -3  -2  858.79   33.20
  -8   2  16   80.42    8.87
  -8   2  16  111.80    9.71
   8  -2 -16   62.34    7.29
  -8   2  15 1060.06   42.17
  -8   2  15 1074.07   42.40
   8  -2 -15  921.37   36.19
  -8   2  14  386.76   17.61
  -8   2  14  427.62   20.13
   8  -2 -14  366.59   16.25
  -8   2  13  472.12   21.76
  -8   2  13  478.20   20.83
   8  -2 -13  459.56   19.80
  -8   2  12  113.85   10.60
  -8   2  12   92.60    9.76
   8  -2 -12  104.75    9.34
  -8   2  11   67.95    9.01
  -8   2  11   49.73    9.20
   8  -2 -11   74.81    8.41
  -8   2  10   51.37    8.87
  -8   2  10   66.27    9.11
   8  -2 -10   60.43    8.31
  -8   2   9  667.79   27.51
  -8   2   9  614.56   25.82
   8  -2  -9  631.37   25.92
  -8   2   8  354.26   16.30
  -8   2   8  322.17   15.46
   8  -2  -8  333.99   15.46
  -8   2   7  394.56   17.84
  -8   2   7  420.06   18.45
   8  -2  -7  384.56   16.81
  -8   2   6  370.46   16.76
  -8   2   6  374.85   16.81
   8  -2  -6  339.83   15.08
  -8   2   5 1176.34   45.67
  -8   2   5 1092.75   42.78
   8  -2  -5 1021.30   39.69
  -8   2   4  118.61    7.85
  -8   2   4  125.62    8.41
   8  -2  -4   96.53    6.68
  -8   2   3   46.37    5.74
  -8   2   3   50.71    7.10
   8  -2  -3   36.57    4.86
  -8   2   2  609.42   24.14
  -8   2   2  582.33   22.88
  -8   1  16  252.03   13.64
  -8   1  16  250.26   13.26
   8  -1 -16  193.66   10.27
  -8   1  15  245.26   13.17
  -8   1  15  269.83   14.76
   8  -1 -15  203.70   10.83
  -8   1  14  170.82   12.14
  -8   1  14  179.93   11.44
   8  -1 -14  185.30   10.60
  -8   1  13  601.48   25.40
  -8   1  13  592.14   25.45
   8  -1 -13  565.99   23.63
  -8   1  12    1.45    8.59
  -8   1  12   -7.33    8.45
   8  -1 -12    6.77    7.85
  -8   1  11   91.39    9.81
  -8   1  11   57.39    9.43
   8  -1 -11   80.84    8.45
  -8   1  10  161.81   11.07
  -8   1  10  162.09   11.35
   8  -1 -10  153.92   10.09
  -8   1   9  104.61    9.53
  -8   1   9  108.01    9.76
   8  -1  -9  117.40    8.92
  -8   1   8  547.78   23.07
  -8   1   8  538.44   22.93
   8  -1  -8  489.87   20.55
  -8   1   7 1047.92   41.28
  -8   1   7 1028.31   40.67
   8  -1  -7  954.99   37.50
  -8   1   6 1758.68   67.62
  -8   1   6 1682.09   64.86
   8  -1  -6 1568.61   60.29
  -8   1   5  106.61    8.22
  -8   1   5  114.32    8.50
   8  -1  -5   95.87    7.10
  -8   1   4  137.95    8.45
  -8   1   4  157.09    9.15
   8  -1  -4  118.47    7.24
  -8   1   3  141.73    8.78
  -8   1   3  157.23    8.55
  -8   1   2  568.79   22.37
  -8   1   2  576.73   22.98
  -8   0  17  198.56   11.16
  -8   0  17  216.64   12.05
   8   0 -17  166.71    9.39
   8   0 -16   52.63    7.10
  -8   0  15   50.29    9.99
  -8   0  15   46.28    8.78
   8   0 -15   50.06    7.10
  -8   0  14  141.03   11.02
  -8   0  14  136.59   11.35
   8   0 -14  129.78    9.11
  -8   0  13    9.62    9.01
  -8   0  13    8.55    7.66
   8   0 -13    5.60    7.29
  -8   0  12  169.70   11.16
  -8   0  12  165.59   11.67
   8   0 -12  161.76   10.51
  -8   0  11    5.56    8.13
  -8   0  11   14.62    8.78
   8   0 -11   21.01    7.29
  -8   0  10  718.69   29.75
  -8   0  10  679.93   28.11
   8   0 -10  661.25   27.09
  -8   0   9   10.13    7.99
  -8   0   9   12.80    8.27
   8   0  -9    2.62    7.38
  -8   0   8 1894.10   72.85
  -8   0   8 1993.57   76.77
   8   0  -8 1831.06   70.28
  -8   0   7  692.54   28.02
  -8   0   7  671.06   27.60
   8   0  -7  659.39   26.57
  -8   0   6  594.94   24.28
  -8   0   6  629.97   25.92
   8   0  -6  568.32   23.16
  -8   0   5    6.68    7.85
  -8   0   5   24.19    6.02
   8   0  -5   12.75    6.02
  -8   0   4  246.06   11.49
  -8   0   4  249.79   12.52
  -8   0   3   92.51    6.58
  -8   0   3   88.03    7.33
  -8   0   2   80.42    6.82
  -8   0   2   85.74    5.70
  -8  -1  17   64.96    8.78
  -8  -1  17   59.73    7.94
   8   1 -17   31.94    6.44
  -8  -1  16   -0.33    8.03
  -8  -1  16   14.06    8.59
   8   1 -16   -8.83    6.49
  -8  -1  15  744.38   30.45
  -8  -1  15  733.17   30.54
   8   1 -15  570.66   23.35
  -8  -1  14  392.36   18.03
  -8  -1  14  377.79   18.45
   8   1 -14  337.77   15.46
  -8  -1  13  203.37   12.24
  -8  -1  13  200.66   12.66
   8   1 -13  187.68   10.88
  -8  -1  12   49.27    9.15
  -8  -1  12   50.11    8.73
   8   1 -12   54.87    8.45
  -8  -1  11  818.16   33.11
  -8  -1  11  794.35   32.50
   8   1 -11  748.11   30.26
  -8  -1  10   75.09    8.97
  -8  -1  10   73.32    9.43
   8   1 -10   67.90    8.31
  -8  -1   9  455.36   19.89
  -8  -1   9  410.81   18.68
   8   1  -9  394.04   17.42
  -8  -1   8  167.18   10.23
  -8  -1   8  196.84   12.00
   8   1  -8  152.89    9.57
  -8  -1   7 2922.88  111.38
  -8  -1   7 3133.95  119.60
   8   1  -7 2884.12  109.79
  -8  -1   6    4.62    6.12
  -8  -1   6   10.55    8.03
  -8  -1   5  880.74   34.70
  -8  -1   5  879.80   35.02
  -8  -1   4   72.90    6.82
  -8  -1   4   66.45    8.27
  -8  -1   3    6.16    5.37
  -8  -1   3   -2.05    6.30
  -8  -1   2   15.22    4.95
  -8  -1   2   12.19    6.86
  -8  -1   1  107.92    6.16
  -8  -1   1   92.60    7.19
  -8  -2  16  194.13   11.02
  -8  -2  16  162.61   11.25
   8   2 -16  118.80    8.31
  -8  -2  15   18.87    8.55
  -8  -2  15   19.10    9.25
   8   2 -15    3.22    6.54
  -8  -2  14  477.26   20.97
  -8  -2  14  470.26   21.34
   8   2 -14  342.86   15.60
  -8  -2  13  190.11   12.66
  -8  -2  13  198.89   12.05
   8   2 -13  153.87   10.04
  -8  -2  12  179.65   12.00
  -8  -2  12  189.69   11.63
   8   2 -12  174.00   10.93
  -8  -2  11    8.27    7.99
  -8  -2  11    4.95    8.92
   8   2 -11   -2.85    7.29
  -8  -2  10  925.57   37.03
  -8  -2  10  898.02   36.33
   8   2 -10  877.94   34.98
  -8  -2   9   48.57    8.13
  -8  -2   9   51.04   10.04
   8   2  -9   49.92    8.08
  -8  -2   8  497.81   21.15
  -8  -2   8  524.89   22.74
  -8  -2   7  192.59   11.07
  -8  -2   7  194.78   11.81
  -8  -2   6  394.93   17.09
  -8  -2   6  435.51   19.43
  -8  -2   5   92.18    7.61
  -8  -2   5   87.42    9.25
  -8  -2   4   89.71    8.73
  -8  -2   4   82.19    7.33
  -8  -2   3   63.37    6.35
  -8  -2   3   64.82    8.08
   8   2  -3   73.74    8.45
  -8  -2   2  253.15   11.67
  -8  -2   2  259.74   13.08
   8   2  -2  296.02   14.10
  -8  -2   1   43.90    7.14
  -8  -2   1   56.37    5.70
   8   2  -1   64.54    7.89
  -8  -2   0   77.47    6.02
  -8  -2   0   70.52    7.43
   8   2   0  103.02    7.99
  -8  -2  -1    5.14    5.84
  -8  -2  -1    2.80    4.48
   8   2   1    1.31    6.16
  -8  -2  -2 1120.30   43.29
  -8  -2  -2 1177.28   45.20
   8   2   2 1365.94   52.58
   8   2   3  633.70   24.94
   8   2   4  185.11    8.73
   8   2   5   59.68    5.23
   8   2   6   -0.42    4.34
  -8  -2  -7  546.84   22.60
   8   2   7   -1.03    4.86
  -8  -2  -8   -2.90    4.76
  -8  -3  16   14.48    8.50
  -8  -3  16   -5.88    8.03
   8   3 -16   -4.34    6.21
  -8  -3  15  448.96   19.89
  -8  -3  15  431.03   19.66
   8   3 -15  326.14   14.76
  -8  -3  14   47.82    8.08
  -8  -3  14   44.83    9.85
   8   3 -14   32.60    7.10
  -8  -3  13  516.02   23.16
  -8  -3  13  481.00   21.01
   8   3 -13  425.24   18.49
  -8  -3  12   12.05    8.17
  -8  -3  12   -5.88    9.34
   8   3 -12   -0.28    7.47
  -8  -3  11  256.42   14.43
  -8  -3  11  276.83   14.29
   8   3 -11  245.22   12.84
  -8  -3  10  176.05   13.12
  -8  -3  10  185.91   11.25
  -8  -3   9  758.39   30.77
  -8  -3   9  794.35   32.97
  -8  -3   8   89.80    8.41
  -8  -3   8   96.01    9.99
  -8  -3   7  217.57   11.49
  -8  -3   7  232.09   13.08
  -8  -3   6   13.40    7.19
  -8  -3   6   -2.57    8.08
   8   3  -6    4.34    8.22
  -8  -3   5  111.28    8.50
  -8  -3   5  107.22    9.67
   8   3  -5  133.32   10.88
  -8  -3   4  116.89   10.13
  -8  -3   4  104.09    7.89
   8   3  -4  115.35   10.83
  -8  -3   3    6.16    5.84
  -8  -3   3    1.77    8.08
   8   3  -3   -3.04    8.50
  -8  -3   2  366.45   16.95
  -8  -3   2  336.65   14.76
   8   3  -2  448.17   19.85
  -8  -3   1  250.49   13.08
  -8  -3   1  257.68   11.86
   8   3  -1  306.53   15.13
  -8  -3   0  518.82   21.90
  -8  -3   0  501.54   20.31
   8   3   0  622.49   25.54
  -8  -3  -1  204.45   11.11
  -8  -3  -1  237.14   10.83
   8   3   1  297.28   14.15
  -8  -3  -2  707.02   28.58
  -8  -3  -2  728.03   28.63
   8   3   2  853.19   34.00
  -8  -3  -3  576.26   22.88
  -8  -3  -3  633.70   25.64
   8   3   3  731.77   29.47
   8   3   4   78.87    8.08
   8   3   5   41.14    6.72
  -8  -3  -6  265.90   13.12
   8   3   6   80.37    6.96
  -8  -3  -7   24.28    7.10
   8   3   7   -6.44    5.65
  -8  -4  16  153.31   10.23
  -8  -4  16  134.54   10.74
   8   4 -16   88.87    7.52
  -8  -4  15    3.60    7.89
  -8  -4  15   24.75    9.15
   8   4 -15    2.76    6.63
  -8  -4  14  241.15   12.56
  -8  -4  14  230.69   13.59
   8   4 -14  165.50    9.99
  -8  -4  13   38.95    8.08
  -8  -4  13   38.90    9.85
  -8  -4  12  139.26   10.23
  -8  -4  12  134.17   11.39
  -8  -4  11  117.73    9.53
  -8  -4  11  147.38   11.63
  -8  -4  10  201.13   11.72
  -8  -4  10  224.11   13.68
  -8  -4   9   40.39    7.89
  -8  -4   9   38.53    9.62
  -8  -4   8  404.88   19.33
  -8  -4   8  372.94   16.76
   8   4  -8  390.50   18.77
  -8  -4   7    4.16    7.10
  -8  -4   7   -9.95    8.78
   8   4  -7   11.72    9.62
  -8  -4   6  238.63   14.01
  -8  -4   6  219.67   11.39
   8   4  -6  255.02   14.48
  -8  -4   5  547.78   22.56
  -8  -4   5  572.06   24.66
   8   4  -5  656.12   27.79
  -8  -4   4  350.94   15.78
  -8  -4   4  375.22   17.65
   8   4  -4  389.75   18.73
  -8  -4   3   20.45    6.44
  -8  -4   3   16.53    8.87
   8   4  -3   52.58    9.11
  -8  -4   2  159.01   10.97
  -8  -4   2  160.69    9.15
   8   4  -2  178.76   12.09
  -8  -4   1  785.94   31.10
  -8  -4   1  854.59   34.37
   8   4  -1  987.21   39.46
  -8  -4   0   39.32    6.30
  -8  -4   0   49.97    9.11
   8   4   0   45.30    9.39
  -8  -4  -1  111.05    9.76
  -8  -4  -1  116.75    7.80
   8   4   1  186.47   11.58
  -8  -4  -2  194.03    9.76
  -8  -4  -2  195.85   11.86
   8   4   2  240.22   12.84
  -8  -4  -3  299.57   14.85
  -8  -4  -3  293.74   12.89
   8   4   3  351.60   16.48
  -8  -4  -4    7.10    8.17
  -8  -4  -4    2.71    5.51
   8   4   4   -5.84    7.61
  -8  -4  -5    7.47    8.64
   8   4   5   16.86    6.44
  -8  -4  -6   12.42    8.41
   8   4   6   14.48    7.24
  -8  -5  15  331.84   16.34
  -8  -5  15  352.72   16.25
  -8  -5  14    2.80    7.43
  -8  -5  14    2.05    9.43
  -8  -5  13  174.23   10.93
  -8  -5  13  183.71   12.38
  -8  -5  12   13.68    7.71
  -8  -5  12   23.21    9.67
  -8  -5  11   57.02    9.90
  -8  -5  11   54.26    8.17
  -8  -5  10   27.74    7.57
  -8  -5  10   28.39    9.90
  -8  -5   9  550.58   24.10
  -8  -5   9  536.57   22.88
   8   5  -9  599.15   25.78
  -8  -5   8  189.32   10.65
  -8  -5   8  199.17   13.08
   8   5  -8  205.99   13.17
  -8  -5   7  386.25   17.14
  -8  -5   7  381.58   18.45
   8   5  -7  410.81   19.33
  -8  -5   6  117.17    8.64
  -8  -5   6  151.82   12.14
   8   5  -6  141.73   11.81
  -8  -5   5  422.58   18.49
  -8  -5   5  427.15   19.61
   8   5  -5  479.13   21.86
  -8  -5   4  297.33   15.41
  -8  -5   4  306.53   14.43
   8   5  -4  340.90   17.09
  -8  -5   3  475.39   20.17
  -8  -5   3  477.26   21.11
   8   5  -3  552.45   24.28
  -8  -5   2  118.38    8.50
  -8  -5   2  127.72   11.07
   8   5  -2  148.92   11.72
  -8  -5   1  175.40    9.81
  -8  -5   1  189.27   12.66
   8   5  -1  214.44   13.17
  -8  -5   0  367.57   15.92
  -8  -5   0  389.79   18.54
   8   5   0  436.07   19.94
  -8  -5  -1   19.33    8.78
  -8  -5  -1   28.44    6.12
   8   5   1   37.08    9.15
  -8  -5  -2   26.10    6.07
  -8  -5  -2   28.25    9.25
   8   5   2   44.74    8.97
  -8  -5  -3   92.84   10.27
  -8  -5  -3   95.69    7.00
   8   5   3  108.53    9.57
  -8  -5  -4   16.06    9.48
   8   5   4   25.36    8.22
  -8  -6  14  140.24    9.95
  -8  -6  14  138.28   11.11
  -8  -6  13   29.42    7.29
  -8  -6  13   33.16    9.71
  -8  -6  12   19.89    9.39
  -8  -6  12    0.14    7.33
  -8  -6  11   25.54    7.47
  -8  -6  11   36.89    9.90
   8   6 -11   32.97    9.01
  -8  -6  10   64.44    9.90
  -8  -6  10   50.25    7.43
   8   6 -10   31.57    9.76
  -8  -6   9   57.63    7.94
  -8  -6   9   68.27   10.27
   8   6  -9   63.42   10.74
  -8  -6   8  614.56   26.15
  -8  -6   8  576.26   23.86
   8   6  -8  666.86   28.58
  -8  -6   7  187.92   12.33
  -8  -6   7  158.36   10.04
   8   6  -7  210.84   13.87
  -8  -6   6   40.11    9.95
  -8  -6   6   58.51    7.80
   8   6  -6   78.36   10.88
  -8  -6   5  301.86   14.38
  -8  -6   5  294.90   15.60
   8   6  -5  357.57   17.56
  -8  -6   4   75.61    8.17
  -8  -6   4   57.67    9.71
   8   6  -4   88.87    9.67
  -8  -6   3  220.84   11.81
  -8  -6   3  227.10   13.31
   8   6  -3  242.83   14.06
  -8  -6   2  154.90    9.71
  -8  -6   2  129.12   10.93
   8   6  -2  162.93   11.86
  -8  -6   1  453.12   20.41
  -8  -6   1  399.79   17.47
   8   6  -1  497.81   22.04
  -8  -6   0   12.05    6.40
  -8  -6   0   23.12    9.43
   8   6   0   30.54    9.81
  -8  -6  -1  117.26   10.97
  -8  -6  -1  139.54    8.83
   8   6   1  159.29   11.91
  -8  -6  -2   31.15    6.30
  -8  -6  -2   29.37   10.09
   8   6   2   13.54    8.78
  -8  -6  -3   66.36    7.19
  -8  -6  -3   57.35   10.32
   8   6   3   54.87    8.83
  -8  -7  13   -3.32    7.10
  -8  -7  13   -5.23    9.48
  -8  -7  12   22.98    7.29
  -8  -7  12   15.74    8.31
   8   7 -12   17.23    8.03
  -8  -7  11   13.36    9.29
  -8  -7  11   -5.46    6.68
   8   7 -11   -0.98    8.92
  -8  -7  10   31.66    7.29
  -8  -7  10   40.02    9.81
   8   7 -10   61.50    9.43
  -8  -7   9  440.32   18.91
  -8  -7   9  513.22   22.79
   8   7  -9  507.62   22.65
  -8  -7   8  305.41   14.43
  -8  -7   8  337.40   17.33
   8   7  -8  330.53   16.44
  -8  -7   7   66.87   10.51
  -8  -7   7   79.48    7.47
   8   7  -7   81.35    9.99
  -8  -7   6  104.47   10.79
  -8  -7   6  110.02    8.59
   8   7  -6  135.10   11.86
  -8  -7   5  298.31   15.64
  -8  -7   5  292.10   13.87
   8   7  -5  349.26   17.33
  -8  -7   4  289.81   13.82
  -8  -7   4  302.28   15.78
   8   7  -4  355.56   17.70
  -8  -7   3  176.05   10.41
  -8  -7   3  196.60   13.50
   8   7  -3  208.32   13.26
  -8  -7   2  125.11   11.63
  -8  -7   2  114.37    8.31
   8   7  -2  159.85   11.95
  -8  -7   1  104.33   11.95
  -8  -7   1  114.79    8.55
   8   7  -1  129.03   11.07
  -8  -7   0  129.64    8.59
  -8  -7   0   97.65   11.07
   8   7   0  140.47   11.35
  -8  -7  -1    3.78    6.72
  -8  -7  -1    9.67   10.13
   8   7   1    4.76    8.97
  -8  -8  10    2.15    6.54
  -8  -8  10   -0.05    9.57
   8   8 -10   -7.00    8.78
  -8  -8   9  516.49   22.65
  -8  -8   9  465.63   19.75
   8   8  -9  532.83   23.44
  -8  -8   8  175.31   12.05
  -8  -8   8  188.29   10.83
   8   8  -8  217.76   12.70
  -8  -8   7  185.25   10.46
  -8  -8   7  162.00   12.09
   8   8  -7  175.31   11.77
  -8  -8   6   25.40    9.85
  -8  -8   6    9.76    6.86
   8   8  -6   -4.11    9.43
  -8  -8   5  339.31   15.50
  -8  -8   5  339.83   17.19
   8   8  -5  417.58   19.10
  -8  -8   4  131.88    8.83
  -8  -8   4  114.37   11.25
   8   8  -4  162.84   12.00
  -8  -8   3   40.49   10.79
  -8  -8   3   40.86    7.10
   8   8  -3   58.70    9.48
  -8  -8   2   -2.48    6.44
  -8  -8   2    5.56   11.07
   8   8  -2   -2.24    9.71
  -9  11   5   21.01    8.41
   9 -11  -5   17.00    8.08
  -9  11   4  527.23   22.37
   9 -11  -4  626.70   25.87
  -9  11   3  380.27   18.17
   9 -11  -3  389.89   17.61
  -9  11   2  634.64   26.38
   9 -11  -2  707.02   28.86
  -9  11   1   36.52    9.06
   9 -11  -1   44.74    8.41
  -9  11   0  119.50    9.81
   9 -11   0  125.53    9.67
  -9  11  -1  121.84    9.76
   9 -11   1  124.83    9.71
  -9  11  -2  140.10   10.27
   9 -11   2  180.26   10.79
  -9  11  -3   -0.05    6.86
   9 -11   3    6.12    7.75
   9 -11   3   -2.48    6.82
  -9  11  -4   -2.66    7.24
   9 -11   4    0.37    7.52
   9 -11   4   -1.17    6.40
  -9  10   8   21.57    7.85
   9 -10  -8   21.86    7.14
  -9  10   7  128.75   10.18
   9 -10  -7  153.03    9.81
  -9  10   6  204.59   11.72
   9 -10  -6  222.57   12.28
  -9  10   5  306.48   15.36
   9 -10  -5  379.24   16.95
  -9  10   4  138.18   10.46
   9 -10  -4  185.81   11.30
  -9  10   3  220.75   12.61
   9 -10  -3  277.76   13.87
  -9  10   2  275.94   14.24
   9 -10  -2  228.45   12.38
  -9  10   1  302.65   14.94
   9 -10  -1  273.51   13.45
  -9  10   0   -1.17    7.94
   9 -10   0    5.00    6.91
  -9  10  -1   36.43    7.75
   9 -10   1   18.59    7.05
  -9  10  -2   22.98    7.47
   9 -10   2   39.18    7.14
  -9  10  -3   12.05    6.82
   9 -10   3    8.69    6.82
   9 -10   3   12.33    6.35
  -9  10  -4  165.13    9.53
   9 -10   4  222.19   10.97
   9 -10   4  228.26   11.44
  -9  10  -5  120.76    7.57
  -9  10  -6   17.14    5.37
  -9   9   9   -1.87    7.47
   9  -9  -9   -0.89    7.19
  -9   9   8  429.21   19.29
   9  -9  -8  394.84   17.47
  -9   9   7   -2.52    7.61
   9  -9  -7   -0.47    7.66
  -9   9   6   23.02    8.31
   9  -9  -6   -4.39    7.38
  -9   9   5  202.72   11.95
   9  -9  -5  239.94   12.70
  -9   9   4   -2.05    7.89
   9  -9  -4    1.03    6.77
  -9   9   3  202.67   11.53
   9  -9  -3  220.09   11.81
  -9   9   2   76.12    8.59
   9  -9  -2   67.06    7.38
  -9   9   1  235.92   12.61
   9  -9  -1  200.71   10.69
  -9   9   0  129.36    9.06
   9  -9   0  129.26    8.64
  -9   9  -1  409.22   17.65
   9  -9   1  379.52   16.25
  -9   9  -2   10.27    6.40
   9  -9   2   18.87    7.99
  -9   9  -3  179.79    9.34
  -9   9  -4  177.13    8.83
  -9   9  -5  509.95   20.45
  -9   8  11  213.60   11.63
   9  -8 -11  186.80   10.60
  -9   8  10   36.19    7.66
   9  -8 -10   21.34    7.71
  -9   8   9  161.76   10.27
   9  -8  -9  142.15   10.04
  -9   8   8   11.77    7.33
   9  -8  -8    5.60    6.96
  -9   8   7  202.63   11.58
   9  -8  -7  199.87   11.21
  -9   8   6   16.25    7.33
   9  -8  -6    9.99    7.19
  -9   8   5  118.66    9.29
   9  -8  -5  129.59    8.92
  -9   8   4  281.83   13.87
   9  -8  -4  289.11   13.54
  -9   8   3    6.30    7.43
   9  -8  -3    2.94    6.26
  -9   8   2  743.44   29.89
   9  -8  -2  819.10   32.32
  -9   8   1  178.81   10.13
   9  -8  -1  168.40    9.06
  -9   8   0  301.16   13.82
   9  -8   0  284.86   12.52
  -9   8  -1   49.55    6.30
   9  -8   1   54.68    5.98
  -9   8  -2  503.41   20.50
  -9   8  -3   -0.84    4.62
  -9   7  12   76.40    8.83
   9  -7 -12   64.02    8.08
  -9   7  11   24.10    9.34
   9  -7 -11   -5.93    7.05
  -9   7  10  290.75   14.80
   9  -7 -10  273.33   13.73
  -9   7   9  400.54   17.84
   9  -7  -9  336.37   15.41
  -9   7   8  492.21   21.20
   9  -7  -8  494.07   20.87
  -9   7   7    1.91    7.00
   9  -7  -7   -0.14    6.82
  -9   7   6  168.12   10.46
   9  -7  -6  162.51    9.76
  -9   7   5   70.89    7.85
   9  -7  -5   81.96    7.57
  -9   7   4   14.48    7.10
   9  -7  -4   14.43    6.49
  -9   7   3  500.14   20.97
   9  -7  -3  498.74   20.59
  -9   7   2   73.78    7.47
   9  -7  -2   74.81    6.77
  -9   7   1  594.01   23.91
   9  -7  -1  542.17   21.71
  -9   7   0   85.55    7.00
   9  -7   0   79.62    6.16
  -9   7  -1  275.76   11.91
   9  -7   1  270.81   11.72
  -9   7  -2    3.22    2.90
  -9   6  13   77.75    8.64
   9  -6 -13   74.58    7.47
  -9   6  12  280.01   14.38
   9  -6 -12  255.86   12.70
  -9   6  11  124.83   10.09
   9  -6 -11  141.59    9.85
  -9   6  10  129.08   10.04
   9  -6 -10  120.39    9.20
  -9   6   9  251.75   13.40
   9  -6  -9  240.31   12.38
  -9   6   8   48.75    7.89
   9  -6  -8   54.92    7.57
  -9   6   7  150.42   10.46
   9  -6  -7  134.96    9.20
  -9   6   6  307.42   14.43
   9  -6  -6  291.21   13.87
  -9   6   5   47.21    7.43
   9  -6  -5   31.05    6.82
  -9   6   4  658.45   26.62
   9  -6  -4  584.67   23.68
  -9   6   3    5.84    6.26
   9  -6  -3   -0.28    5.56
  -9   6   2 1020.84   39.74
   9  -6  -2  945.65   36.71
  -9   6   1   52.02    6.16
   9  -6  -1   41.47    5.14
  -9   6   0  166.11    8.59
   9  -6   0  134.31    6.49
  -9   5  14   47.26    8.13
   9  -5 -14   17.65    6.82
  -9   5  13   33.16    8.69
   9  -5 -13   14.71    7.24
  -9   5  12  119.69   10.09
   9  -5 -12   91.16    8.41
  -9   5  11   60.76    8.87
   9  -5 -11   52.68    7.66
  -9   5  10   11.77    8.87
   9  -5 -10    5.93    7.10
  -9   5   9  476.79   20.92
   9  -5  -9  397.08   17.37
  -9   5   8   42.54    8.64
   9  -5  -8   42.87    7.29
  -9   5   7  218.74   12.24
   9  -5  -7  188.71   10.41
  -9   5   6   92.37    8.50
   9  -5  -6   90.50    7.47
  -9   5   5  334.50   15.36
   9  -5  -5  282.39   12.94
  -9   5   4   32.97    6.21
   9  -5  -4   29.61    5.79
  -9   5   3  162.89    9.01
   9  -5  -3  114.55    7.05
  -9   5   2   22.00    6.21
  -9   5   2   20.27    5.42
   9  -5  -2   12.94    4.72
   9  -5  -1  401.42   15.97
  -9   4  15   60.90    8.41
  -9   4  15   80.74    9.81
   9  -4 -15   50.20    7.66
  -9   4  14   20.78    8.92
  -9   4  14   32.97    8.78
   9  -4 -14   18.21    6.77
  -9   4  13  198.75   12.14
  -9   4  13  165.78   11.35
   9  -4 -13  121.93    8.64
  -9   4  12  298.83   15.04
  -9   4  12  286.40   15.22
   9  -4 -12  227.70   11.77
   9  -4 -11  417.07   18.17
  -9   4  10   76.59    9.39
   9  -4 -10   66.97    7.52
  -9   4   9  380.22   17.37
   9  -4  -9  319.84   14.71
  -9   4   8  314.19   15.13
   9  -4  -8  223.92   11.58
  -9   4   7   10.09    7.99
  -9   4   7    6.77    7.85
   9  -4  -7    9.76    6.07
  -9   4   6  953.12   37.97
  -9   4   6  885.41   35.16
   9  -4  -6  740.64   29.51
  -9   4   5  163.59   10.18
  -9   4   5  147.38    9.62
   9  -4  -5  126.27    8.27
  -9   4   4   65.38    7.10
  -9   4   4   52.02    7.19
   9  -4  -4   60.99    6.16
  -9   4   3  142.57    8.83
  -9   4   3  146.31    8.22
   9  -4  -3  118.94    7.10
  -9   4   2  778.00   30.31
  -9   4   2  799.95   31.33
   9  -4  -2  693.48   26.95
  -9   4   1   78.17    4.39
  -9   3  15  203.09   12.52
  -9   3  15  191.28   11.58
   9  -3 -15  132.76    8.83
  -9   3  14  355.38   16.67
  -9   3  14  323.06   15.92
   9  -3 -14  310.92   14.48
  -9   3  13   97.83    9.67
  -9   3  13  125.29   10.79
   9  -3 -13  103.81    8.73
  -9   3  12    4.86    8.27
  -9   3  12    6.40    8.78
   9  -3 -12    3.55    7.85
  -9   3  11  916.23   36.71
  -9   3  11  884.94   35.96
   9  -3 -11  862.99   34.42
  -9   3  10  423.70   19.47
  -9   3  10  466.33   20.36
   9  -3 -10  462.08   19.99
  -9   3   9 1396.29   54.73
  -9   3   9 1476.15   57.35
   9  -3  -9 1255.73   48.85
  -9   3   8   60.10    8.27
  -9   3   8   43.06    8.64
   9  -3  -8   51.37    7.80
  -9   3   7  157.66    9.95
  -9   3   7  141.82   10.32
   9  -3  -7  120.62    8.31
  -9   3   6  202.11   11.63
  -9   3   6  210.80   11.35
   9  -3  -6  188.10    9.99
  -9   3   5  138.60    9.06
  -9   3   5  146.35    9.48
   9  -3  -5  112.26    7.38
  -9   3   4  338.85   14.94
  -9   3   4  351.78   15.50
   9  -3  -4  303.12   13.17
  -9   3   3   27.13    5.14
  -9   3   3   26.85    6.26
   9  -3  -3   28.11    4.90
  -9   2  15  326.80   15.74
  -9   2  15  308.03   15.60
   9  -2 -15  271.23   12.80
  -9   2  14  255.63   13.82
  -9   2  14  248.34   13.68
   9  -2 -14  213.27   11.35
  -9   2  13   59.21   10.04
  -9   2  13   60.66    8.97
   9  -2 -13   47.49    7.47
  -9   2  12  216.73   13.50
  -9   2  12  229.99   12.98
   9  -2 -12  179.84   10.46
  -9   2  11  185.72   11.58
  -9   2  11  191.00   12.19
   9  -2 -11  195.06   11.25
  -9   2  10  870.00   35.02
  -9   2  10  812.09   33.30
   9  -2 -10  792.01   31.80
  -9   2   9   -4.81    8.55
  -9   2   9  -10.83    7.89
   9  -2  -9   12.33    7.38
  -9   2   8 1060.06   41.75
  -9   2   8  996.55   39.69
   9  -2  -8  927.44   36.61
  -9   2   7    1.07    6.96
  -9   2   7   12.66    7.89
   9  -2  -7    0.33    6.35
  -9   2   6    6.96    6.82
  -9   2   6   -3.36    7.33
   9  -2  -6   15.18    6.16
  -9   2   5  173.58   10.13
  -9   2   5  188.85   10.41
   9  -2  -5  164.52    8.78
  -9   2   4   13.26    6.02
  -9   2   4    2.38    6.12
   9  -2  -4    6.72    5.04
  -9   2   3  477.26   19.52
  -9   2   3  486.13   19.47
  -9   1  16  282.71   14.10
  -9   1  16  280.15   14.57
   9  -1 -16  212.01   10.93
  -9   1  15  128.52   10.51
  -9   1  15  123.80    9.85
   9  -1 -15   72.20    7.43
  -9   1  14    1.21    8.87
  -9   1  14    1.45    8.55
   9  -1 -14    8.64    6.68
  -9   1  13  256.98   14.38
  -9   1  13  251.99   13.64
   9  -1 -13  255.54   12.94
  -9   1  12   32.64    8.55
  -9   1  12   24.28    9.43
   9  -1 -12   44.64    7.85
  -9   1  11  289.02   15.22
  -9   1  11  251.19   13.45
   9  -1 -11  269.08   13.36
  -9   1  10   -3.41    7.99
  -9   1  10   -8.97    8.78
   9  -1 -10    1.45    7.10
  -9   1   9 1556.94   60.47
  -9   1   9 1464.94   57.25
   9  -1  -9 1315.04   51.09
  -9   1   8   44.88    8.83
  -9   1   8   58.47    8.36
   9  -1  -8   62.44    7.33
  -9   1   7   34.18    8.22
  -9   1   7   35.44    7.47
   9  -1  -7   44.36    6.72
  -9   1   6   74.44    8.13
  -9   1   6   64.54    8.41
   9  -1  -6   62.48    6.58
  -9   1   5  561.32   22.93
  -9   1   5  516.02   21.76
   9  -1  -5  429.07   17.89
  -9   1   4  427.39   17.79
  -9   1   4  421.08   17.93
  -9   1   3  614.09   24.28
  -9   1   3  556.18   22.46
  -9   0  16  320.35   15.27
  -9   0  16  371.63   17.75
   9   0 -16  284.02   13.36
  -9   0  15    3.60    7.29
  -9   0  15   13.45    8.83
   9   0 -15   -6.54    6.58
  -9   0  14  -14.62    8.83
  -9   0  14    4.30    8.78
   9   0 -14    5.04    6.77
  -9   0  13   38.01    8.45
  -9   0  13   29.42    9.48
   9   0 -13   13.26    7.75
  -9   0  12  245.36   14.24
  -9   0  12  261.89   13.68
   9   0 -12  215.00   11.53
  -9   0  11   18.82    7.85
  -9   0  11    8.64    8.87
   9   0 -11   17.14    7.80
  -9   0  10  480.53   20.73
  -9   0  10  415.43   19.52
   9   0 -10  396.85   17.51
  -9   0   9  409.64   18.31
  -9   0   9  365.74   17.47
   9   0  -9  356.03   16.06
  -9   0   8 1652.20   63.74
  -9   0   8 1614.84   62.76
   9   0  -8 1361.27   52.72
  -9   0   7   47.35    8.36
  -9   0   7   71.59    7.71
   9   0  -7   53.28    6.77
  -9   0   6  821.90   33.16
  -9   0   6  790.14   31.38
  -9   0   5  332.26   15.69
  -9   0   5  328.95   14.66
  -9   0   4  488.47   20.08
  -9   0   4  491.27   20.78
  -9   0   3    5.98    4.81
  -9   0   3   16.11    6.40
  -9  -1  16   42.78    7.89
  -9  -1  16   33.02    9.25
   9   1 -16   32.08    6.72
  -9  -1  15  351.17   16.90
  -9  -1  15  327.36   15.27
   9   1 -15  257.22   12.42
  -9  -1  14   34.23    8.69
  -9  -1  14   34.70    8.50
   9   1 -14   18.54    6.96
  -9  -1  13  486.60   21.20
  -9  -1  13  438.78   20.22
   9   1 -13  388.72   17.33
  -9  -1  12   12.14    7.99
  -9  -1  12   20.55    9.48
   9   1 -12   13.45    7.14
  -9  -1  11  272.49   14.80
  -9  -1  11  263.89   13.64
   9   1 -11  229.66   12.14
  -9  -1  10   28.07    7.80
  -9  -1  10   15.50    9.11
   9   1 -10   19.33    7.14
  -9  -1   9 1339.32   52.12
  -9  -1   9 1353.33   53.24
   9   1  -9 1276.74   49.64
  -9  -1   8  143.27    9.76
  -9  -1   8  165.78   11.58
   9   1  -8  122.96    8.50
  -9  -1   7 1301.49   50.95
  -9  -1   7 1181.95   46.04
  -9  -1   6   76.59    7.57
  -9  -1   6   81.40    9.11
  -9  -1   5  337.91   14.99
  -9  -1   5  358.97   16.81
  -9  -1   4   12.05    5.79
  -9  -1   4    8.97    7.52
  -9  -1   3    9.11    6.77
  -9  -1   3   19.89    5.23
  -9  -1   2  257.50   11.25
  -9  -1   2  220.42   10.93
  -9  -2  15    0.37    8.03
  -9  -2  15  -13.45    8.73
   9   2 -15    5.74    6.58
  -9  -2  14  276.78   14.24
  -9  -2  14  267.68   14.10
   9   2 -14  193.47   11.16
  -9  -2  13   23.72    9.48
  -9  -2  13   18.54    8.31
   9   2 -13   10.60    7.10
  -9  -2  12  466.71   20.50
  -9  -2  12  426.64   19.71
   9   2 -12  368.45   16.48
  -9  -2  11   35.44    9.62
  -9  -2  11   31.15    8.17
   9   2 -11   29.23    7.29
  -9  -2  10  102.36    8.97
  -9  -2  10   98.30   11.58
   9   2 -10   85.55    8.13
  -9  -2   9  192.07   13.17
  -9  -2   9  163.96   10.23
  -9  -2   8  245.31   13.73
  -9  -2   8  243.16   12.38
  -9  -2   6  124.87   10.51
  -9  -2   6  133.28    9.01
  -9  -2   5   40.53    7.00
  -9  -2   5   48.47    8.45
  -9  -2   4   25.78    6.30
  -9  -2   4   39.69    8.59
  -9  -2   3  266.42   12.28
  -9  -2   3  241.34   12.98
  -9  -2   2    4.11    5.04
  -9  -2   2    5.74    7.19
  -9  -2   1  775.20   30.17
  -9  -2   1  787.81   31.19
   9   2   1   44.36    4.86
  -9  -3  15   16.02    8.03
  -9  -3  15   16.20    9.43
   9   3 -15   11.81    6.82
  -9  -3  14  206.32   13.17
  -9  -3  14  187.96   11.39
   9   3 -14  116.37    8.73
  -9  -3  13  279.35   14.99
  -9  -3  13  280.80   14.29
   9   3 -13  220.09   11.39
  -9  -3  12  266.23   13.73
  -9  -3  12  256.56   14.62
  -9  -3  11   85.55    8.92
  -9  -3  11   85.65   10.46
  -9  -3  10    9.11    7.47
  -9  -3  10   18.54    9.57
  -9  -3   9  432.71   18.91
  -9  -3   9  408.33   19.29
  -9  -3   8  380.22   17.00
  -9  -3   8  399.37   18.77
  -9  -3   7  165.78   11.91
  -9  -3   7  141.31    9.62
  -9  -3   6    3.60    6.82
  -9  -3   6    8.08    9.06
  -9  -3   5  182.45   10.13
  -9  -3   5  172.04   11.63
  -9  -3   4   37.78    6.77
  -9  -3   4   14.71    8.45
   9   3  -4   35.12    8.45
  -9  -3   3   80.18    9.62
  -9  -3   3   82.52    6.96
   9   3  -3  100.54    9.99
  -9  -3   2  635.10   25.45
  -9  -3   2  656.12   27.23
   9   3  -2  717.29   29.23
  -9  -3   1  167.60    8.64
  -9  -3   1  187.87   11.44
   9   3  -1  211.55   11.86
   9   3   0  461.20   19.80
  -9  -3  -1  134.54    7.10
  -9  -3  -1  129.82    9.01
   9   3   1   61.92    7.61
  -9  -3  -2  339.03   14.94
  -9  -3  -2  338.57   13.96
   9   3   2    1.49    5.70
   9   3   3    1.54    5.18
   9   3   4    1.17    4.76
   9   3   5    4.16    5.00
  -9  -4  14   69.25    8.59
  -9  -4  14   92.56   10.09
  -9  -4  13  456.90   19.66
  -9  -4  13  518.82   23.02
  -9  -4  12  713.09   29.09
  -9  -4  12  766.79   31.71
  -9  -4  11  282.34   14.10
  -9  -4  11  262.59   14.52
  -9  -4  10   34.18    7.66
  -9  -4  10   33.30    9.67
  -9  -4   9  100.45    8.64
  -9  -4   9  129.87   10.88
  -9  -4   8  214.67   11.53
  -9  -4   8  188.15   12.47
  -9  -4   7  461.29   19.85
  -9  -4   7  495.47   22.23
  -9  -4   6  461.62   19.71
  -9  -4   6  522.09   23.07
   9   4  -6  555.25   24.24
  -9  -4   5  127.25   10.60
  -9  -4   5  146.49    9.43
   9   4  -5  165.87   11.53
  -9  -4   4  100.59    7.85
  -9  -4   4  109.04   10.69
   9   4  -4  116.61   10.69
  -9  -4   3  400.16   17.14
  -9  -4   3  418.79   19.19
   9   4  -3  523.96   22.70
  -9  -4   2  123.89    8.22
  -9  -4   2  131.04   11.21
   9   4  -2  136.55   10.60
  -9  -4   1  478.66   21.15
  -9  -4   1  471.66   19.43
   9   4  -1  577.66   24.61
  -9  -4   0    9.39    5.60
  -9  -4   0   19.43    8.87
   9   4   0   13.31    8.13
  -9  -4  -1  482.87   19.57
  -9  -4  -1  454.10   20.13
   9   4   1  439.76   19.05
  -9  -4  -2   -1.73    5.09
  -9  -4  -2    5.46    8.55
   9   4   2    8.50    6.63
  -9  -4  -3  232.14   10.41
  -9  -4  -3  237.28   12.80
   9   4   3   -1.73    6.77
  -9  -5  14   53.00    7.99
  -9  -5  14   75.84    9.90
  -9  -5  13   10.88    7.66
  -9  -5  13   23.35    9.20
  -9  -5  12  265.02   13.03
  -9  -5  12  298.69   15.60
  -9  -5  11    6.63    9.53
  -9  -5  11   23.12    7.52
  -9  -5  10  300.93   15.78
  -9  -5  10  260.95   12.98
  -9  -5   9   23.30    9.48
  -9  -5   9   28.11    7.52
  -9  -5   8  157.51   10.37
  -9  -5   8  158.26   11.53
   9   5  -8  182.13   12.56
  -9  -5   7   -3.69    7.10
  -9  -5   7   11.72    8.87
   9   5  -7    2.05    8.69
  -9  -5   6  175.59   10.18
  -9  -5   6  162.00   11.81
   9   5  -6  217.20   13.31
  -9  -5   5   92.37   10.13
  -9  -5   5  104.33    8.45
   9   5  -5  107.41   11.25
  -9  -5   4  187.45   10.55
[truncated: 346,756 more chars]
