# Supplementary material
Source: MDPI journal article supplement (https://www.mdpi.com/2304-6740/5/3/51)
Supplement: s1 [file s1 › inorganics-207671-supplementary/4.cif]

 
data_ld6 
 
_audit_creation_method            SHELXL-97 
_chemical_name_systematic 
; 
 ? 
; 
_chemical_name_common             '[Fe(3-EtO-SalEen)2]Cl'
_chemical_melting_point           ? 
_chemical_formula_moiety           'C26 H38 Fe N4 O4, Cl'
_chemical_formula_sum 
 'C26 H38 Cl Fe N4 O4' 
_chemical_formula_weight          561.90 
 
loop_ 
 _atom_type_symbol 
 _atom_type_description 
 _atom_type_scat_dispersion_real 
 _atom_type_scat_dispersion_imag 
 _atom_type_scat_source 
 'C'  'C'   0.0033   0.0016 
 'International Tables Vol C Tables 4.2.6.8 and 6.1.1.4' 
 'H'  'H'   0.0000   0.0000 
 'International Tables Vol C Tables 4.2.6.8 and 6.1.1.4' 
 'N'  'N'   0.0061   0.0033 
 'International Tables Vol C Tables 4.2.6.8 and 6.1.1.4' 
 'O'  'O'   0.0106   0.0060 
 'International Tables Vol C Tables 4.2.6.8 and 6.1.1.4' 
 'Cl'  'Cl'   0.1484   0.1585 
 'International Tables Vol C Tables 4.2.6.8 and 6.1.1.4' 
 'Fe'  'Fe'   0.3463   0.8444 
 'International Tables Vol C Tables 4.2.6.8 and 6.1.1.4' 
 
_symmetry_cell_setting            'Triclinic' 
_symmetry_space_group_name_H-M    'P -1' 
 
loop_ 
 _symmetry_equiv_pos_as_xyz 
 'x, y, z' 
 '-x, -y, -z' 
 
_cell_length_a                    9.6980(19) 
_cell_length_b                    10.633(2) 
_cell_length_c                    13.515(3) 
_cell_angle_alpha                 96.15(3) 
_cell_angle_beta                  103.05(3) 
_cell_angle_gamma                 103.49(3) 
_cell_volume                      1301.3(4) 
_cell_formula_units_Z             2 
_cell_measurement_temperature     100(2) 
_cell_measurement_reflns_used     5628 
_cell_measurement_theta_min       0.991
_cell_measurement_theta_max       27.10 
 
_exptl_crystal_description        'Block' 
_exptl_crystal_colour             'Blue-orange' 
_exptl_crystal_size_max           0.02 
_exptl_crystal_size_mid           0.01 
_exptl_crystal_size_min           0.01 
_exptl_crystal_density_meas       ? 
_exptl_crystal_density_diffrn     1.434 
_exptl_crystal_density_method     'not measured' 
_exptl_crystal_F_000              594 
_exptl_absorpt_coefficient_mu     0.722 
_exptl_absorpt_correction_type    'Multi-Scan' 
_exptl_absorpt_correction_T_min   0.9857 
_exptl_absorpt_correction_T_max   0.9964 
_exptl_absorpt_process_details    'XScale within XDS' 
 
_exptl_special_details 
; 
 ? 
; 
 
_diffrn_ambient_temperature       100(2) 
_diffrn_radiation_wavelength      0.71073 
_diffrn_radiation_type            Synchrotron 
_diffrn_radiation_source          'Australian Synchrotron' 
_diffrn_radiation_monochromator   'Silicon Double Crystal' 
_diffrn_measurement_device_type   'ADSC Quantum 210r' 
_diffrn_measurement_method        'Phi Scan' 
_diffrn_detector_area_resol_mean  ? 
_diffrn_standards_number          ? 
_diffrn_standards_interval_count  ? 
_diffrn_standards_interval_time   ? 
_diffrn_standards_decay_%         ? 
_diffrn_reflns_number             21725 
_diffrn_reflns_av_R_equivalents   0.1664 
_diffrn_reflns_av_sigmaI/netI     0.1096 
_diffrn_reflns_limit_h_min        -12 
_diffrn_reflns_limit_h_max        12 
_diffrn_reflns_limit_k_min        -13 
_diffrn_reflns_limit_k_max        13 
_diffrn_reflns_limit_l_min        -17 
_diffrn_reflns_limit_l_max        17 
_diffrn_reflns_theta_min          1.57 
_diffrn_reflns_theta_max          27.10 
_reflns_number_total              5703 
_reflns_number_gt                 4282 
_reflns_threshold_expression      >2sigma(I) 
 
_computing_data_collection        'BluIce (McPhillips, 2002)' 
_computing_cell_refinement        'XDS (Kabsch, 1993)' 
_computing_data_reduction         'XDS (Kabsch, 1993)' 
_computing_structure_solution     'SHELXL-97 (Sheldrick, 1997)'
_computing_structure_refinement   'SHELXL-97 (Sheldrick, 1997)' 
_computing_molecular_graphics     'X-SEED' 
_computing_publication_material   'XCIF V6.12 (BrukerAXS, 2001).' 
 
_refine_special_details 
; 
 Refinement of F^2^ against ALL reflections.  The weighted R-factor wR and 
 goodness of fit S are based on F^2^, conventional R-factors R are based 
 on F, with F set to zero for negative F^2^. The threshold expression of 
 F^2^ > 2sigma(F^2^) is used only for calculating R-factors(gt) etc. and is 
 not relevant to the choice of reflections for refinement.  R-factors based 
 on F^2^ are statistically about twice as large as those based on F, and R- 
 factors based on ALL data will be even larger. 
; 
 
_refine_ls_structure_factor_coef  Fsqd  
_refine_ls_matrix_type            full 
_refine_ls_weighting_scheme       calc  
_refine_ls_weighting_details 
 'calc w=1/[\s^2^(Fo^2^)+(0.0757P)^2^+0.0000P] where P=(Fo^2^+2Fc^2^)/3' 
_atom_sites_solution_primary      direct 
_atom_sites_solution_secondary    difmap 
_atom_sites_solution_hydrogens    geom 
_refine_ls_hydrogen_treatment     mixed 
_refine_ls_extinction_method      none 
_refine_ls_extinction_coef        ? 
_refine_ls_number_reflns          5703 
_refine_ls_number_parameters      329 
_refine_ls_number_restraints      0 
_refine_ls_R_factor_all           0.0802 
_refine_ls_R_factor_gt            0.0573 
_refine_ls_wR_factor_ref          0.1518 
_refine_ls_wR_factor_gt           0.1382 
_refine_ls_goodness_of_fit_ref    1.000 
_refine_ls_restrained_S_all       1.000 
_refine_ls_shift/su_max           0.001 
_refine_ls_shift/su_mean          0.000 
 
loop_ 
 _atom_site_label 
 _atom_site_type_symbol 
 _atom_site_fract_x 
 _atom_site_fract_y 
 _atom_site_fract_z 
 _atom_site_U_iso_or_equiv 
 _atom_site_adp_type 
 _atom_site_occupancy 
 _atom_site_symmetry_multiplicity 
 _atom_site_calc_flag 
 _atom_site_refinement_flags 
 _atom_site_disorder_assembly 
 _atom_site_disorder_group 
Fe1 Fe 0.55346(4) 0.75149(4) 0.76852(3) 0.02016(14) Uani 1 1 d . . . 
O4 O 0.4349(2) 0.7767(2) 0.64411(16) 0.0221(4) Uani 1 1 d . . . 
N1 N 0.5199(3) 0.5740(3) 0.7019(2) 0.0220(5) Uani 1 1 d . . . 
N4 N 0.5896(3) 0.9290(3) 0.8360(2) 0.0219(5) Uani 1 1 d . . . 
O2 O 0.7301(2) 0.8097(2) 0.73200(17) 0.0236(5) Uani 1 1 d . . . 
N2 N 0.3663(3) 0.6789(3) 0.8121(2) 0.0230(5) Uani 1 1 d . . . 
H2 H 0.3936 0.6591 0.8779 0.028 Uiso 1 1 calc R . . 
N3 N 0.6785(3) 0.7312(3) 0.9066(2) 0.0231(5) Uani 1 1 d . . . 
H3 H 0.6149 0.7078 0.9478 0.028 Uiso 1 1 calc R . . 
C9 C 0.5843(3) 0.5357(3) 0.6348(2) 0.0231(6) Uani 1 1 d . . . 
H9 H 0.5468 0.4478 0.5993 0.028 Uiso 1 1 calc R . . 
C23 C 0.6735(3) 0.9556(3) 0.9442(2) 0.0263(6) Uani 1 1 d . . . 
H23A H 0.6066 0.9387 0.9896 0.032 Uiso 1 1 calc R . . 
H23B H 0.7326 1.0482 0.9638 0.032 Uiso 1 1 calc R . . 
C12 C 0.2709(3) 0.7711(3) 0.8154(3) 0.0251(6) Uani 1 1 d . . . 
H12A H 0.2408 0.7931 0.7458 0.030 Uiso 1 1 calc R . . 
H12B H 0.3292 0.8534 0.8626 0.030 Uiso 1 1 calc R . . 
C14 C 0.1391(4) 0.6368(4) 0.2921(3) 0.0327(7) Uani 1 1 d . . . 
H14A H 0.2269 0.6148 0.2793 0.049 Uiso 1 1 calc R . . 
H14B H 0.0705 0.6357 0.2263 0.049 Uiso 1 1 calc R . . 
H14C H 0.0917 0.5723 0.3290 0.049 Uiso 1 1 calc R . . 
C11 C 0.2871(3) 0.5541(3) 0.7407(2) 0.0234(6) Uani 1 1 d . . . 
H11A H 0.2362 0.5721 0.6737 0.028 Uiso 1 1 calc R . . 
H11B H 0.2129 0.5009 0.7700 0.028 Uiso 1 1 calc R . . 
C7 C 0.7085(3) 0.6166(3) 0.6102(2) 0.0227(6) Uani 1 1 d . . . 
C8 C 0.7775(3) 0.7461(3) 0.6630(2) 0.0208(6) Uani 1 1 d . . . 
O1 O 0.9744(2) 0.9365(2) 0.70099(18) 0.0249(5) Uani 1 1 d . . . 
C10 C 0.4002(3) 0.4807(3) 0.7262(3) 0.0250(6) Uani 1 1 d . . . 
H10A H 0.4374 0.4476 0.7899 0.030 Uiso 1 1 calc R . . 
H10B H 0.3558 0.4051 0.6692 0.030 Uiso 1 1 calc R . . 
C15 C 0.1824(3) 0.7721(3) 0.3565(3) 0.0264(6) Uani 1 1 d . . . 
H15A H 0.2357 0.8369 0.3214 0.032 Uiso 1 1 calc R . . 
H15B H 0.0934 0.7977 0.3650 0.032 Uiso 1 1 calc R . . 
C3 C 0.9105(3) 0.8155(3) 0.6421(2) 0.0225(6) Uani 1 1 d . . . 
C24 C 0.7734(3) 0.8636(3) 0.9540(3) 0.0262(6) Uani 1 1 d . . . 
H24A H 0.8509 0.8898 0.9178 0.031 Uiso 1 1 calc R . . 
H24B H 0.8208 0.8657 1.0274 0.031 Uiso 1 1 calc R . . 
C6 C 0.7694(3) 0.5604(3) 0.5354(2) 0.0240(6) Uani 1 1 d . . . 
H6 H 0.7236 0.4731 0.5000 0.029 Uiso 1 1 calc R . . 
C4 C 0.9653(3) 0.7589(3) 0.5673(3) 0.0255(6) Uani 1 1 d . . . 
H4 H 1.0518 0.8066 0.5523 0.031 Uiso 1 1 calc R . . 
C2 C 1.0920(3) 1.0204(3) 0.6714(3) 0.0242(6) Uani 1 1 d . . . 
H2A H 1.0546 1.0454 0.6040 0.029 Uiso 1 1 calc R . . 
H2B H 1.1683 0.9744 0.6653 0.029 Uiso 1 1 calc R . . 
C20 C 0.4773(3) 1.0132(3) 0.6881(2) 0.0224(6) Uani 1 1 d . . . 
C19 C 0.4519(3) 1.1295(3) 0.6553(3) 0.0250(6) Uani 1 1 d . . . 
H19 H 0.4917 1.2103 0.7018 0.030 Uiso 1 1 calc R . . 
C22 C 0.5590(3) 1.0247(3) 0.7924(2) 0.0239(6) Uani 1 1 d . . . 
H22 H 0.5936 1.1099 0.8329 0.029 Uiso 1 1 calc R . . 
C5 C 0.8933(3) 0.6313(3) 0.5140(3) 0.0270(7) Uani 1 1 d . . . 
H5 H 0.9309 0.5936 0.4624 0.032 Uiso 1 1 calc R . . 
C25 C 0.7618(3) 0.6293(3) 0.9037(3) 0.0282(7) Uani 1 1 d . . . 
H25A H 0.8274 0.6492 0.8577 0.034 Uiso 1 1 calc R . . 
H25B H 0.6913 0.5427 0.8737 0.034 Uiso 1 1 calc R . . 
C21 C 0.4177(3) 0.8903(3) 0.6201(2) 0.0222(6) Uani 1 1 d . . . 
O3 O 0.2747(2) 0.7714(2) 0.45565(17) 0.0244(5) Uani 1 1 d . . . 
C16 C 0.3319(3) 0.8915(3) 0.5189(2) 0.0221(6) Uani 1 1 d . . . 
C1 C 1.1558(4) 1.1412(3) 0.7541(3) 0.0311(7) Uani 1 1 d . . . 
H1A H 1.0760 1.1712 0.7736 0.047 Uiso 1 1 calc R . . 
H1B H 1.2155 1.2108 0.7278 0.047 Uiso 1 1 calc R . . 
H1C H 1.2174 1.1197 0.8146 0.047 Uiso 1 1 calc R . . 
C17 C 0.3097(3) 1.0075(3) 0.4897(3) 0.0243(6) Uani 1 1 d . . . 
H17 H 0.2519 1.0060 0.4224 0.029 Uiso 1 1 calc R . . 
C18 C 0.3710(3) 1.1277(3) 0.5576(2) 0.0247(6) Uani 1 1 d . . . 
H18 H 0.3566 1.2069 0.5360 0.030 Uiso 1 1 calc R . . 
C26 C 0.8530(4) 0.6207(4) 1.0082(3) 0.0370(8) Uani 1 1 d . . . 
H26A H 0.9372 0.6983 1.0315 0.056 Uiso 1 1 calc R . . 
H26B H 0.8880 0.5416 1.0032 0.056 Uiso 1 1 calc R . . 
H26C H 0.7927 0.6167 1.0577 0.056 Uiso 1 1 calc R . . 
C13 C 0.1327(3) 0.7152(3) 0.8509(3) 0.0306(7) Uani 1 1 d . . . 
H13A H 0.0678 0.6405 0.7996 0.046 Uiso 1 1 calc R . . 
H13B H 0.0812 0.7833 0.8586 0.046 Uiso 1 1 calc R . . 
H13C H 0.1609 0.6862 0.9172 0.046 Uiso 1 1 calc R . . 
Cl1 Cl 0.45942(9) 0.68596(8) 1.05679(6) 0.0299(2) Uani 1 1 d . . . 
 
loop_ 
 _atom_site_aniso_label 
 _atom_site_aniso_U_11 
 _atom_site_aniso_U_22 
 _atom_site_aniso_U_33 
 _atom_site_aniso_U_23 
 _atom_site_aniso_U_13 
 _atom_site_aniso_U_12 
Fe1 0.0177(2) 0.0216(2) 0.0236(2) 0.00293(16) 0.00826(16) 0.00769(16) 
O4 0.0241(10) 0.0227(11) 0.0222(11) 0.0047(8) 0.0091(8) 0.0081(8) 
N1 0.0185(11) 0.0249(13) 0.0256(13) 0.0061(10) 0.0083(10) 0.0080(10) 
N4 0.0182(11) 0.0248(13) 0.0232(13) 0.0016(10) 0.0061(10) 0.0069(10) 
O2 0.0222(10) 0.0237(11) 0.0283(12) 0.0012(9) 0.0128(9) 0.0083(8) 
N2 0.0196(12) 0.0248(13) 0.0269(14) 0.0032(10) 0.0082(10) 0.0087(10) 
N3 0.0201(12) 0.0259(13) 0.0268(13) 0.0042(10) 0.0105(10) 0.0088(10) 
C9 0.0230(14) 0.0224(15) 0.0257(15) 0.0026(11) 0.0056(11) 0.0107(12) 
C23 0.0266(15) 0.0269(16) 0.0249(16) 0.0010(12) 0.0052(12) 0.0089(13) 
C12 0.0204(14) 0.0284(16) 0.0301(17) 0.0027(12) 0.0106(12) 0.0105(12) 
C14 0.0344(17) 0.0345(18) 0.0286(17) 0.0008(14) 0.0029(13) 0.0147(15) 
C11 0.0191(13) 0.0217(15) 0.0296(16) 0.0022(12) 0.0088(12) 0.0046(11) 
C7 0.0211(14) 0.0220(15) 0.0267(15) 0.0032(11) 0.0073(11) 0.0084(12) 
C8 0.0178(13) 0.0245(15) 0.0215(14) 0.0033(11) 0.0053(11) 0.0084(11) 
O1 0.0214(10) 0.0237(11) 0.0303(12) 0.0014(9) 0.0120(9) 0.0033(8) 
C10 0.0235(14) 0.0247(16) 0.0289(16) 0.0031(12) 0.0092(12) 0.0086(12) 
C15 0.0249(14) 0.0280(16) 0.0276(16) 0.0035(12) 0.0063(12) 0.0108(13) 
C3 0.0211(14) 0.0211(15) 0.0273(16) 0.0033(12) 0.0077(12) 0.0082(12) 
C24 0.0204(14) 0.0290(16) 0.0279(16) 0.0025(12) 0.0044(12) 0.0068(12) 
C6 0.0224(14) 0.0236(15) 0.0283(16) 0.0034(12) 0.0082(12) 0.0096(12) 
C4 0.0207(14) 0.0305(16) 0.0293(16) 0.0055(12) 0.0125(12) 0.0083(12) 
C2 0.0200(13) 0.0252(16) 0.0309(16) 0.0053(12) 0.0121(12) 0.0071(12) 
C20 0.0193(13) 0.0210(15) 0.0286(16) 0.0034(12) 0.0096(12) 0.0060(11) 
C19 0.0222(14) 0.0241(15) 0.0321(17) 0.0036(12) 0.0114(12) 0.0091(12) 
C22 0.0216(14) 0.0214(15) 0.0296(16) -0.0007(12) 0.0107(12) 0.0061(12) 
C5 0.0271(15) 0.0308(17) 0.0278(16) 0.0022(13) 0.0126(12) 0.0127(13) 
C25 0.0252(15) 0.0301(17) 0.0339(18) 0.0050(13) 0.0111(13) 0.0131(13) 
C21 0.0195(13) 0.0254(15) 0.0270(15) 0.0054(12) 0.0122(11) 0.0101(12) 
O3 0.0242(10) 0.0223(11) 0.0280(12) 0.0029(9) 0.0077(9) 0.0082(9) 
C16 0.0187(13) 0.0245(15) 0.0269(15) 0.0039(12) 0.0113(11) 0.0076(11) 
C1 0.0236(15) 0.0310(18) 0.0372(19) 0.0008(14) 0.0112(13) 0.0030(13) 
C17 0.0211(14) 0.0277(16) 0.0280(16) 0.0072(12) 0.0091(12) 0.0101(12) 
C18 0.0257(14) 0.0221(15) 0.0317(17) 0.0072(12) 0.0121(12) 0.0111(12) 
C26 0.0333(18) 0.043(2) 0.041(2) 0.0088(16) 0.0097(15) 0.0212(16) 
C13 0.0214(14) 0.0332(18) 0.0406(19) 0.0046(14) 0.0138(13) 0.0089(13) 
Cl1 0.0316(4) 0.0314(4) 0.0297(4) 0.0050(3) 0.0119(3) 0.0102(3) 
 
_geom_special_details 
; 
 All esds (except the esd in the dihedral angle between two l.s. planes) 
 are estimated using the full covariance matrix.  The cell esds are taken 
 into account individually in the estimation of esds in distances, angles 
 and torsion angles; correlations between esds in cell parameters are only 
 used when they are defined by crystal symmetry.  An approximate (isotropic) 
 treatment of cell esds is used for estimating esds involving l.s. planes. 
; 
 
loop_ 
 _geom_bond_atom_site_label_1 
 _geom_bond_atom_site_label_2 
 _geom_bond_distance 
 _geom_bond_site_symmetry_2 
 _geom_bond_publ_flag 
Fe1 O2 1.874(2) . ? 
Fe1 O4 1.895(2) . ? 
Fe1 N4 1.922(3) . ? 
Fe1 N1 1.923(3) . ? 
Fe1 N2 2.041(3) . ? 
Fe1 N3 2.046(3) . ? 
O4 C21 1.321(4) . ? 
N1 C9 1.294(4) . ? 
N1 C10 1.464(4) . ? 
N4 C22 1.289(4) . ? 
N4 C23 1.465(4) . ? 
O2 C8 1.320(3) . ? 
N2 C11 1.482(4) . ? 
N2 C12 1.500(4) . ? 
N2 H2 0.9300 . ? 
N3 C24 1.475(4) . ? 
N3 C25 1.497(4) . ? 
N3 H3 0.9300 . ? 
C9 C7 1.435(4) . ? 
C9 H9 0.9500 . ? 
C23 C24 1.524(4) . ? 
C23 H23A 0.9900 . ? 
C23 H23B 0.9900 . ? 
C12 C13 1.537(4) . ? 
C12 H12A 0.9900 . ? 
C12 H12B 0.9900 . ? 
C14 C15 1.512(5) . ? 
C14 H14A 0.9800 . ? 
C14 H14B 0.9800 . ? 
C14 H14C 0.9800 . ? 
C11 C10 1.522(4) . ? 
C11 H11A 0.9900 . ? 
C11 H11B 0.9900 . ? 
C7 C8 1.413(4) . ? 
C7 C6 1.426(4) . ? 
C8 C3 1.432(4) . ? 
O1 C3 1.364(4) . ? 
O1 C2 1.437(4) . ? 
C10 H10A 0.9900 . ? 
C10 H10B 0.9900 . ? 
C15 O3 1.435(4) . ? 
C15 H15A 0.9900 . ? 
C15 H15B 0.9900 . ? 
C3 C4 1.389(4) . ? 
C24 H24A 0.9900 . ? 
C24 H24B 0.9900 . ? 
C6 C5 1.370(5) . ? 
C6 H6 0.9500 . ? 
C4 C5 1.403(5) . ? 
C4 H4 0.9500 . ? 
C2 C1 1.514(4) . ? 
C2 H2A 0.9900 . ? 
C2 H2B 0.9900 . ? 
C20 C19 1.413(4) . ? 
C20 C21 1.427(4) . ? 
C20 C22 1.429(5) . ? 
C19 C18 1.372(5) . ? 
C19 H19 0.9500 . ? 
C22 H22 0.9500 . ? 
C5 H5 0.9500 . ? 
C25 C26 1.512(5) . ? 
C25 H25A 0.9900 . ? 
C25 H25B 0.9900 . ? 
C21 C16 1.434(4) . ? 
O3 C16 1.375(4) . ? 
C16 C17 1.384(4) . ? 
C1 H1A 0.9800 . ? 
C1 H1B 0.9800 . ? 
C1 H1C 0.9800 . ? 
C17 C18 1.406(4) . ? 
C17 H17 0.9500 . ? 
C18 H18 0.9500 . ? 
C26 H26A 0.9800 . ? 
C26 H26B 0.9800 . ? 
C26 H26C 0.9800 . ? 
C13 H13A 0.9800 . ? 
C13 H13B 0.9800 . ? 
C13 H13C 0.9800 . ? 
 
loop_ 
 _geom_angle_atom_site_label_1 
 _geom_angle_atom_site_label_2 
 _geom_angle_atom_site_label_3 
 _geom_angle 
 _geom_angle_site_symmetry_1 
 _geom_angle_site_symmetry_3 
 _geom_angle_publ_flag 
O2 Fe1 O4 94.32(10) . . ? 
O2 Fe1 N4 86.19(10) . . ? 
O4 Fe1 N4 94.14(11) . . ? 
O2 Fe1 N1 93.32(10) . . ? 
O4 Fe1 N1 86.48(11) . . ? 
N4 Fe1 N1 179.24(11) . . ? 
O2 Fe1 N2 176.35(10) . . ? 
O4 Fe1 N2 88.45(10) . . ? 
N4 Fe1 N2 96.00(11) . . ? 
N1 Fe1 N2 84.46(11) . . ? 
O2 Fe1 N3 86.84(10) . . ? 
O4 Fe1 N3 177.24(9) . . ? 
N4 Fe1 N3 83.44(11) . . ? 
N1 Fe1 N3 95.96(11) . . ? 
N2 Fe1 N3 90.50(11) . . ? 
C21 O4 Fe1 126.12(19) . . ? 
C9 N1 C10 120.1(3) . . ? 
C9 N1 Fe1 126.0(2) . . ? 
C10 N1 Fe1 113.60(18) . . ? 
C22 N4 C23 119.3(3) . . ? 
C22 N4 Fe1 125.9(2) . . ? 
C23 N4 Fe1 114.4(2) . . ? 
C8 O2 Fe1 126.5(2) . . ? 
C11 N2 C12 111.9(2) . . ? 
C11 N2 Fe1 106.55(17) . . ? 
C12 N2 Fe1 114.7(2) . . ? 
C11 N2 H2 107.8 . . ? 
C12 N2 H2 107.8 . . ? 
Fe1 N2 H2 107.8 . . ? 
C24 N3 C25 113.1(2) . . ? 
C24 N3 Fe1 105.9(2) . . ? 
C25 N3 Fe1 116.63(19) . . ? 
C24 N3 H3 106.9 . . ? 
C25 N3 H3 106.9 . . ? 
Fe1 N3 H3 106.9 . . ? 
N1 C9 C7 124.6(3) . . ? 
N1 C9 H9 117.7 . . ? 
C7 C9 H9 117.7 . . ? 
N4 C23 C24 106.5(2) . . ? 
N4 C23 H23A 110.4 . . ? 
C24 C23 H23A 110.4 . . ? 
N4 C23 H23B 110.4 . . ? 
C24 C23 H23B 110.4 . . ? 
H23A C23 H23B 108.6 . . ? 
N2 C12 C13 113.6(3) . . ? 
N2 C12 H12A 108.8 . . ? 
C13 C12 H12A 108.8 . . ? 
N2 C12 H12B 108.8 . . ? 
C13 C12 H12B 108.8 . . ? 
H12A C12 H12B 107.7 . . ? 
C15 C14 H14A 109.5 . . ? 
C15 C14 H14B 109.5 . . ? 
H14A C14 H14B 109.5 . . ? 
C15 C14 H14C 109.5 . . ? 
H14A C14 H14C 109.5 . . ? 
H14B C14 H14C 109.5 . . ? 
N2 C11 C10 107.5(2) . . ? 
N2 C11 H11A 110.2 . . ? 
C10 C11 H11A 110.2 . . ? 
N2 C11 H11B 110.2 . . ? 
C10 C11 H11B 110.2 . . ? 
H11A C11 H11B 108.5 . . ? 
C8 C7 C6 119.5(3) . . ? 
C8 C7 C9 121.9(3) . . ? 
C6 C7 C9 118.4(3) . . ? 
O2 C8 C7 125.2(3) . . ? 
O2 C8 C3 116.2(3) . . ? 
C7 C8 C3 118.6(2) . . ? 
C3 O1 C2 117.2(2) . . ? 
N1 C10 C11 106.9(2) . . ? 
N1 C10 H10A 110.3 . . ? 
C11 C10 H10A 110.3 . . ? 
N1 C10 H10B 110.3 . . ? 
C11 C10 H10B 110.3 . . ? 
H10A C10 H10B 108.6 . . ? 
O3 C15 C14 109.5(3) . . ? 
O3 C15 H15A 109.8 . . ? 
C14 C15 H15A 109.8 . . ? 
O3 C15 H15B 109.8 . . ? 
C14 C15 H15B 109.8 . . ? 
H15A C15 H15B 108.2 . . ? 
O1 C3 C4 125.0(3) . . ? 
O1 C3 C8 114.6(2) . . ? 
C4 C3 C8 120.4(3) . . ? 
N3 C24 C23 106.3(2) . . ? 
N3 C24 H24A 110.5 . . ? 
C23 C24 H24A 110.5 . . ? 
N3 C24 H24B 110.5 . . ? 
C23 C24 H24B 110.5 . . ? 
H24A C24 H24B 108.7 . . ? 
C5 C6 C7 120.5(3) . . ? 
C5 C6 H6 119.8 . . ? 
C7 C6 H6 119.8 . . ? 
C3 C4 C5 120.1(3) . . ? 
C3 C4 H4 119.9 . . ? 
C5 C4 H4 119.9 . . ? 
O1 C2 C1 107.4(2) . . ? 
O1 C2 H2A 110.2 . . ? 
C1 C2 H2A 110.2 . . ? 
O1 C2 H2B 110.2 . . ? 
C1 C2 H2B 110.2 . . ? 
H2A C2 H2B 108.5 . . ? 
C19 C20 C21 120.5(3) . . ? 
C19 C20 C22 116.9(3) . . ? 
C21 C20 C22 122.6(3) . . ? 
C18 C19 C20 121.2(3) . . ? 
C18 C19 H19 119.4 . . ? 
C20 C19 H19 119.4 . . ? 
N4 C22 C20 125.4(3) . . ? 
N4 C22 H22 117.3 . . ? 
C20 C22 H22 117.3 . . ? 
C6 C5 C4 120.8(3) . . ? 
C6 C5 H5 119.6 . . ? 
C4 C5 H5 119.6 . . ? 
N3 C25 C26 113.7(3) . . ? 
N3 C25 H25A 108.8 . . ? 
C26 C25 H25A 108.8 . . ? 
N3 C25 H25B 108.8 . . ? 
C26 C25 H25B 108.8 . . ? 
H25A C25 H25B 107.7 . . ? 
O4 C21 C20 124.7(3) . . ? 
O4 C21 C16 118.3(3) . . ? 
C20 C21 C16 117.0(3) . . ? 
C16 O3 C15 115.3(2) . . ? 
O3 C16 C17 123.6(3) . . ? 
O3 C16 C21 115.6(3) . . ? 
C17 C16 C21 120.8(3) . . ? 
C2 C1 H1A 109.5 . . ? 
C2 C1 H1B 109.5 . . ? 
H1A C1 H1B 109.5 . . ? 
C2 C1 H1C 109.5 . . ? 
H1A C1 H1C 109.5 . . ? 
H1B C1 H1C 109.5 . . ? 
C16 C17 C18 121.2(3) . . ? 
C16 C17 H17 119.4 . . ? 
C18 C17 H17 119.4 . . ? 
C19 C18 C17 119.3(3) . . ? 
C19 C18 H18 120.3 . . ? 
C17 C18 H18 120.3 . . ? 
C25 C26 H26A 109.5 . . ? 
C25 C26 H26B 109.5 . . ? 
H26A C26 H26B 109.5 . . ? 
C25 C26 H26C 109.5 . . ? 
H26A C26 H26C 109.5 . . ? 
H26B C26 H26C 109.5 . . ? 
C12 C13 H13A 109.5 . . ? 
C12 C13 H13B 109.5 . . ? 
H13A C13 H13B 109.5 . . ? 
C12 C13 H13C 109.5 . . ? 
H13A C13 H13C 109.5 . . ? 
H13B C13 H13C 109.5 . . ? 
 
_diffrn_measured_fraction_theta_max    0.991 
_diffrn_reflns_theta_full              27.10 
_diffrn_measured_fraction_theta_full   0.991 
_refine_diff_density_max    0.992 
_refine_diff_density_min   -0.957 
_refine_diff_density_rms    0.100 
