# Supplementary material
Source: MDPI journal article supplement (https://www.mdpi.com/2304-6740/5/3/51)
Supplement: s1 [file s1 › inorganics-207671-supplementary/5.cif]

 
data_ld31 
 
_audit_creation_method            SHELXL-97 
_chemical_name_systematic 
; 
 ? 
; 
_chemical_name_common             ? 
_chemical_melting_point           ? 
_chemical_formula_moiety          ? 
_chemical_formula_sum 
 'C18 H20 Cs Fe N6 O5 S2' 
_chemical_formula_weight          653.28 
 
loop_ 
 _atom_type_symbol 
 _atom_type_description 
 _atom_type_scat_dispersion_real 
 _atom_type_scat_dispersion_imag 
 _atom_type_scat_source 
 'C'  'C'   0.0033   0.0016 
 'International Tables Vol C Tables 4.2.6.8 and 6.1.1.4' 
 'H'  'H'   0.0000   0.0000 
 'International Tables Vol C Tables 4.2.6.8 and 6.1.1.4' 
 'N'  'N'   0.0061   0.0033 
 'International Tables Vol C Tables 4.2.6.8 and 6.1.1.4' 
 'O'  'O'   0.0106   0.0060 
 'International Tables Vol C Tables 4.2.6.8 and 6.1.1.4' 
 'S'  'S'   0.1246   0.1234 
 'International Tables Vol C Tables 4.2.6.8 and 6.1.1.4' 
 'Fe'  'Fe'   0.3463   0.8444 
 'International Tables Vol C Tables 4.2.6.8 and 6.1.1.4' 
 'Cs'  'Cs'  -0.3680   2.1192 
 'International Tables Vol C Tables 4.2.6.8 and 6.1.1.4' 
 
_symmetry_cell_setting            'orthorhombic' 
_symmetry_space_group_name_H-M    'Pnna'
loop_ 
 _symmetry_equiv_pos_as_xyz 
 'x, y, z' 
 '-x+1/2, -y, z' 
 'x, -y+1/2, -z+1/2' 
 '-x+1/2, y+1/2, -z+1/2' 
 '-x, -y, -z' 
 'x-1/2, y, -z' 
 '-x, y-1/2, z-1/2' 
 'x-1/2, -y-1/2, z-1/2' 
 
_cell_length_a                    19.0649(7) 
_cell_length_b                    9.1084(4) 
_cell_length_c                    13.1902(5) 
_cell_angle_alpha                 90.00 
_cell_angle_beta                  90.00 
_cell_angle_gamma                 90.00 
_cell_volume                      2290.49(16) 
_cell_formula_units_Z             4 
_cell_measurement_temperature     123(2) 
_cell_measurement_reflns_used     5808 
_cell_measurement_theta_min       2.92 
_cell_measurement_theta_max       28.73 
 
_exptl_crystal_description        'Hexagonal Bar' 
_exptl_crystal_colour             'Black' 
_exptl_crystal_size_max           0.13 
_exptl_crystal_size_mid           0.05 
_exptl_crystal_size_min           0.03 
_exptl_crystal_density_meas       ? 
_exptl_crystal_density_diffrn     1.894 
_exptl_crystal_density_method     'not measured' 
_exptl_crystal_F_000              1292 
_exptl_absorpt_coefficient_mu     2.451 
_exptl_absorpt_correction_type    multi-scan 
_exptl_absorpt_correction_T_min   0.7493 
_exptl_absorpt_correction_T_max   0.9301 
_exptl_absorpt_process_details    SADABS  
 
_exptl_special_details 
; 
 ? 
; 
 
_diffrn_ambient_temperature       123(2) 
_diffrn_radiation_wavelength      0.71073 
_diffrn_radiation_type            MoK\a 
_diffrn_radiation_source          'fine-focus sealed tube' 
_diffrn_radiation_monochromator   graphite 
_diffrn_measurement_device_type   'APEX X8' 
_diffrn_measurement_method        'scans in phi and omega' 
_diffrn_detector_area_resol_mean  ? 
_diffrn_standards_number          ? 
_diffrn_standards_interval_count  ? 
_diffrn_standards_interval_time   ? 
_diffrn_standards_decay_%         ? 
_diffrn_reflns_number             42177 
_diffrn_reflns_av_R_equivalents   0.0582 
_diffrn_reflns_av_sigmaI/netI     0.0278 
_diffrn_reflns_limit_h_min        -15 
_diffrn_reflns_limit_h_max        27 
_diffrn_reflns_limit_k_min        -13 
_diffrn_reflns_limit_k_max        13 
_diffrn_reflns_limit_l_min        -18 
_diffrn_reflns_limit_l_max        18 
_diffrn_reflns_theta_min          2.14 
_diffrn_reflns_theta_max          30.69 
_reflns_number_total              3544 
_reflns_number_gt                 2737 
_reflns_threshold_expression      >2sigma(I) 
 
_computing_data_collection        'Bruker Apex2 V2.0' 
_computing_cell_refinement        'Bruker Apex2 V2.0' 
_computing_data_reduction         'Bruker Apex2 V2.0' 
_computing_structure_solution     'SHELXS-97 (Sheldrick, 1990)' 
_computing_structure_refinement   'SHELXL-97 (Sheldrick, 1997)' 
_computing_molecular_graphics     'X-SEED'  
_computing_publication_material   'XCIF V6.12 (BrukerAXS, 2001).' 
 
_refine_special_details 
; 
 Refinement of F^2^ against ALL reflections.  The weighted R-factor wR and 
 goodness of fit S are based on F^2^, conventional R-factors R are based 
 on F, with F set to zero for negative F^2^. The threshold expression of 
 F^2^ > 2sigma(F^2^) is used only for calculating R-factors(gt) etc. and is 
 not relevant to the choice of reflections for refinement.  R-factors based 
 on F^2^ are statistically about twice as large as those based on F, and R- 
 factors based on ALL data will be even larger. 
; 
 
_refine_ls_structure_factor_coef  Fsqd  
_refine_ls_matrix_type            full 
_refine_ls_weighting_scheme       calc  
_refine_ls_weighting_details 
 'calc w=1/[\s^2^(Fo^2^)+(0.0209P)^2^+3.6811P] where P=(Fo^2^+2Fc^2^)/3' 
_atom_sites_solution_primary      direct 
_atom_sites_solution_secondary    difmap 
_atom_sites_solution_hydrogens    geom 
_refine_ls_hydrogen_treatment     mixed 
_refine_ls_extinction_method      none 
_refine_ls_extinction_coef        ? 
_refine_ls_number_reflns          3544 
_refine_ls_number_parameters      156 
_refine_ls_number_restraints      0 
_refine_ls_R_factor_all           0.0459 
_refine_ls_R_factor_gt            0.0298 
_refine_ls_wR_factor_ref          0.0684 
_refine_ls_wR_factor_gt           0.0607 
_refine_ls_goodness_of_fit_ref    1.049 
_refine_ls_restrained_S_all       1.049 
_refine_ls_shift/su_max           0.001 
_refine_ls_shift/su_mean          0.000 
 
loop_ 
 _atom_site_label 
 _atom_site_type_symbol 
 _atom_site_fract_x 
 _atom_site_fract_y 
 _atom_site_fract_z 
 _atom_site_U_iso_or_equiv 
 _atom_site_adp_type 
 _atom_site_occupancy 
 _atom_site_symmetry_multiplicity 
 _atom_site_calc_flag 
 _atom_site_refinement_flags 
 _atom_site_disorder_assembly 
 _atom_site_disorder_group 
Cs1 Cs 0.7500 0.0000 0.256054(18) 0.02486(7) Uani 1 2 d S . . 
Fe1 Fe 0.58372(2) 0.2500 0.2500 0.01150(9) Uani 1 2 d S . . 
S1 S 0.50700(3) 0.35911(6) 0.12523(5) 0.02145(13) Uani 1 1 d . . . 
O1 O 0.66312(8) 0.25615(17) 0.34750(12) 0.0154(3) Uani 1 1 d . . . 
O2 O 0.76709(9) 0.1631(2) 0.46301(14) 0.0243(4) Uani 1 1 d . . . 
N1 N 0.55842(10) 0.4607(2) 0.31916(14) 0.0150(4) Uani 1 1 d . . . 
N2 N 0.51788(11) 0.5675(2) 0.27155(15) 0.0193(4) Uani 1 1 d . . . 
N3 N 0.45686(12) 0.6308(2) 0.13090(16) 0.0269(5) Uani 1 1 d . . . 
H3A H 0.4485 0.7171 0.1584 0.032 Uiso 1 1 calc R . . 
H3B H 0.4404 0.6102 0.0702 0.032 Uiso 1 1 calc R . . 
C8 C 0.57252(12) 0.4928(2) 0.41270(17) 0.0161(4) Uani 1 1 d . . . 
H8 H 0.5494 0.5760 0.4404 0.019 Uiso 1 1 calc R . . 
C7 C 0.61957(12) 0.4153(2) 0.47882(17) 0.0151(4) Uani 1 1 d . . . 
C1 C 0.66548(12) 0.3059(2) 0.44138(17) 0.0153(4) Uani 1 1 d . . . 
C9 C 0.49516(13) 0.5294(2) 0.18206(18) 0.0174(5) Uani 1 1 d . . . 
C6 C 0.62359(13) 0.4595(3) 0.58159(18) 0.0192(5) Uani 1 1 d . . . 
H6 H 0.5921 0.5320 0.6063 0.023 Uiso 1 1 calc R . . 
C2 C 0.71932(12) 0.2555(3) 0.50753(18) 0.0186(4) Uani 1 1 d . . . 
C5 C 0.67192(13) 0.3995(3) 0.64569(18) 0.0220(5) Uani 1 1 d . . . 
H5 H 0.6722 0.4258 0.7154 0.026 Uiso 1 1 calc R . . 
C4 C 0.72113(14) 0.2989(3) 0.60797(19) 0.0223(5) Uani 1 1 d . . . 
H4 H 0.7560 0.2602 0.6519 0.027 Uiso 1 1 calc R . . 
C3 C 0.82587(15) 0.1172(3) 0.5227(2) 0.0386(7) Uani 1 1 d . . . 
H3C H 0.8509 0.2037 0.5480 0.058 Uiso 1 1 calc R . . 
H3D H 0.8576 0.0581 0.4809 0.058 Uiso 1 1 calc R . . 
H3E H 0.8093 0.0584 0.5802 0.058 Uiso 1 1 calc R . . 
O3 O 0.8533(2) 0.2405(6) 0.2856(3) 0.0414(11) Uani 0.50 1 d P . -1 
H3F H 0.8921 0.2366 0.2357 0.050 Uiso 0.50 1 calc PR . -1 
H3G H 0.8725 0.2427 0.3553 0.050 Uiso 0.50 1 calc PR . -1 
 
loop_ 
 _atom_site_aniso_label 
 _atom_site_aniso_U_11 
 _atom_site_aniso_U_22 
 _atom_site_aniso_U_33 
 _atom_site_aniso_U_23 
 _atom_site_aniso_U_13 
 _atom_site_aniso_U_12 
Cs1 0.02466(12) 0.01975(10) 0.03015(13) 0.000 0.000 0.00963(8) 
Fe1 0.0111(2) 0.01078(18) 0.0126(2) 0.00012(16) 0.000 0.000 
S1 0.0274(3) 0.0155(2) 0.0215(3) -0.0017(2) -0.0105(2) 0.0043(2) 
O1 0.0150(7) 0.0180(7) 0.0132(7) -0.0007(6) -0.0010(6) 0.0008(6) 
O2 0.0209(9) 0.0274(9) 0.0248(9) -0.0036(7) -0.0088(7) 0.0081(7) 
N1 0.0167(10) 0.0135(8) 0.0147(9) 0.0017(7) 0.0007(7) 0.0006(7) 
N2 0.0260(11) 0.0157(9) 0.0164(10) 0.0013(7) -0.0008(8) 0.0091(8) 
N3 0.0368(13) 0.0233(10) 0.0207(10) -0.0004(8) -0.0058(9) 0.0160(9) 
C8 0.0175(11) 0.0149(9) 0.0158(10) -0.0005(8) 0.0028(9) 0.0001(8) 
C7 0.0167(11) 0.0140(9) 0.0146(10) 0.0014(8) 0.0002(8) -0.0029(8) 
C1 0.0162(11) 0.0150(9) 0.0148(10) 0.0020(8) -0.0010(9) -0.0042(8) 
C9 0.0169(11) 0.0166(10) 0.0186(11) 0.0016(8) 0.0011(9) 0.0035(8) 
C6 0.0226(12) 0.0191(10) 0.0159(11) -0.0010(8) 0.0020(9) -0.0048(9) 
C2 0.0179(11) 0.0179(10) 0.0199(11) 0.0009(9) -0.0035(9) -0.0025(9) 
C5 0.0275(14) 0.0239(12) 0.0145(11) -0.0027(9) -0.0029(9) -0.0078(10) 
C4 0.0241(13) 0.0239(11) 0.0189(12) 0.0027(9) -0.0080(10) -0.0049(10) 
C3 0.0282(16) 0.0448(17) 0.0427(17) -0.0090(14) -0.0197(13) 0.0145(13) 
O3 0.030(2) 0.039(2) 0.055(3) -0.005(3) 0.0057(18) -0.004(2) 
 
_geom_special_details 
; 
 All esds (except the esd in the dihedral angle between two l.s. planes) 
 are estimated using the full covariance matrix.  The cell esds are taken 
 into account individually in the estimation of esds in distances, angles 
 and torsion angles; correlations between esds in cell parameters are only 
 used when they are defined by crystal symmetry.  An approximate (isotropic) 
 treatment of cell esds is used for estimating esds involving l.s. planes. 
; 
 
loop_ 
 _geom_bond_atom_site_label_1 
 _geom_bond_atom_site_label_2 
 _geom_bond_distance 
 _geom_bond_site_symmetry_2 
 _geom_bond_publ_flag 
Cs1 O3 2.972(5) . ? 
Cs1 O3 2.972(5) 2_655 ? 
Cs1 O1 3.0892(16) 4_645 ? 
Cs1 O1 3.0892(16) 3 ? 
Cs1 O1 3.1052(16) . ? 
Cs1 O1 3.1052(16) 2_655 ? 
Cs1 O2 3.1249(18) . ? 
Cs1 O2 3.1249(18) 2_655 ? 
Cs1 O3 3.125(5) 3 ? 
Cs1 O3 3.125(5) 4_645 ? 
Cs1 C1 3.536(2) 4_645 ? 
Cs1 C1 3.536(2) 3 ? 
Fe1 O1 1.9870(16) 3 ? 
Fe1 O1 1.9871(16) . ? 
Fe1 N1 2.1790(18) . ? 
Fe1 N1 2.1790(18) 3 ? 
Fe1 S1 2.4156(6) . ? 
Fe1 S1 2.4156(6) 3 ? 
Fe1 Cs1 3.9040(4) 3 ? 
S1 C9 1.738(2) . ? 
O1 C1 1.319(3) . ? 
O1 Cs1 3.0891(16) 3 ? 
O2 C2 1.372(3) . ? 
O2 C3 1.432(3) . ? 
N1 C8 1.296(3) . ? 
N1 N2 1.392(3) . ? 
N1 Cs1 3.8016(19) 3 ? 
N2 C9 1.304(3) . ? 
N3 C9 1.357(3) . ? 
N3 H3A 0.8800 . ? 
N3 H3B 0.8800 . ? 
C8 C7 1.437(3) . ? 
C8 H8 0.9500 . ? 
C7 C1 1.415(3) . ? 
C7 C6 1.416(3) . ? 
C1 C2 1.423(3) . ? 
C1 Cs1 3.536(2) 3 ? 
C6 C5 1.365(3) . ? 
C6 H6 0.9500 . ? 
C2 C4 1.383(3) . ? 
C5 C4 1.403(4) . ? 
C5 H5 0.9500 . ? 
C4 H4 0.9500 . ? 
C3 H3C 0.9800 . ? 
C3 H3D 0.9800 . ? 
C3 H3E 0.9800 . ? 
O3 Cs1 3.125(5) 3 ? 
O3 H3F 0.9900 . ? 
O3 H3G 0.9900 . ? 
 
loop_ 
 _geom_angle_atom_site_label_1 
 _geom_angle_atom_site_label_2 
 _geom_angle_atom_site_label_3 
 _geom_angle 
 _geom_angle_site_symmetry_1 
 _geom_angle_site_symmetry_3 
 _geom_angle_publ_flag 
O3 Cs1 O3 164.95(17) . 2_655 ? 
O3 Cs1 O1 103.45(9) . 4_645 ? 
O3 Cs1 O1 83.30(9) 2_655 4_645 ? 
O3 Cs1 O1 83.30(9) . 3 ? 
O3 Cs1 O1 103.45(9) 2_655 3 ? 
O1 Cs1 O1 127.52(6) 4_645 3 ? 
O3 Cs1 O1 75.45(9) . . ? 
O3 Cs1 O1 98.60(9) 2_655 . ? 
O1 Cs1 O1 176.40(3) 4_645 . ? 
O1 Cs1 O1 49.12(5) 3 . ? 
O3 Cs1 O1 98.60(9) . 2_655 ? 
O3 Cs1 O1 75.45(9) 2_655 2_655 ? 
O1 Cs1 O1 49.12(5) 4_645 2_655 ? 
O1 Cs1 O1 176.40(3) 3 2_655 ? 
O1 Cs1 O1 134.28(6) . 2_655 ? 
O3 Cs1 O2 57.72(9) . . ? 
O3 Cs1 O2 107.77(9) 2_655 . ? 
O1 Cs1 O2 132.24(4) 4_645 . ? 
O1 Cs1 O2 95.76(4) 3 . ? 
O1 Cs1 O2 50.14(4) . . ? 
O1 Cs1 O2 87.84(4) 2_655 . ? 
O3 Cs1 O2 107.77(9) . 2_655 ? 
O3 Cs1 O2 57.72(9) 2_655 2_655 ? 
O1 Cs1 O2 95.76(4) 4_645 2_655 ? 
O1 Cs1 O2 132.23(4) 3 2_655 ? 
O1 Cs1 O2 87.84(4) . 2_655 ? 
O1 Cs1 O2 50.14(4) 2_655 2_655 ? 
O2 Cs1 O2 58.25(7) . 2_655 ? 
O3 Cs1 O3 17.77(16) . 3 ? 
O3 Cs1 O3 176.65(6) 2_655 3 ? 
O1 Cs1 O3 97.36(9) 4_645 3 ? 
O1 Cs1 O3 73.54(8) 3 3 ? 
O1 Cs1 O3 80.57(9) . 3 ? 
O1 Cs1 O3 107.47(8) 2_655 3 ? 
O2 Cs1 O3 74.23(9) . 3 ? 
O2 Cs1 O3 125.36(9) 2_655 3 ? 
O3 Cs1 O3 176.65(6) . 4_645 ? 
O3 Cs1 O3 17.77(17) 2_655 4_645 ? 
O1 Cs1 O3 73.54(8) 4_645 4_645 ? 
O1 Cs1 O3 97.36(9) 3 4_645 ? 
O1 Cs1 O3 107.47(8) . 4_645 ? 
O1 Cs1 O3 80.58(9) 2_655 4_645 ? 
O2 Cs1 O3 125.36(9) . 4_645 ? 
O2 Cs1 O3 74.23(9) 2_655 4_645 ? 
O3 Cs1 O3 159.77(17) 3 4_645 ? 
O3 Cs1 C1 99.38(10) . 4_645 ? 
O3 Cs1 C1 91.71(10) 2_655 4_645 ? 
O1 Cs1 C1 21.65(4) 4_645 4_645 ? 
O1 Cs1 C1 106.15(5) 3 4_645 ? 
O1 Cs1 C1 154.80(4) . 4_645 ? 
O1 Cs1 C1 70.57(5) 2_655 4_645 ? 
O2 Cs1 C1 146.46(5) . 4_645 ? 
O2 Cs1 C1 116.95(5) 2_655 4_645 ? 
O3 Cs1 C1 87.80(9) 3 4_645 ? 
O3 Cs1 C1 77.28(9) 4_645 4_645 ? 
O3 Cs1 C1 91.71(10) . 3 ? 
O3 Cs1 C1 99.38(10) 2_655 3 ? 
O1 Cs1 C1 106.15(5) 4_645 3 ? 
O1 Cs1 C1 21.65(4) 3 3 ? 
O1 Cs1 C1 70.57(5) . 3 ? 
O1 Cs1 C1 154.80(4) 2_655 3 ? 
O2 Cs1 C1 116.94(5) . 3 ? 
O2 Cs1 C1 146.46(5) 2_655 3 ? 
O3 Cs1 C1 77.28(9) 3 3 ? 
O3 Cs1 C1 87.80(9) 4_645 3 ? 
C1 Cs1 C1 85.14(7) 4_645 3 ? 
O1 Fe1 O1 80.76(9) 3 . ? 
O1 Fe1 N1 117.67(7) 3 . ? 
O1 Fe1 N1 82.69(7) . . ? 
O1 Fe1 N1 82.69(7) 3 3 ? 
O1 Fe1 N1 117.67(7) . 3 ? 
N1 Fe1 N1 154.42(10) . 3 ? 
O1 Fe1 S1 91.83(5) 3 . ? 
O1 Fe1 S1 152.95(5) . . ? 
N1 Fe1 S1 77.81(5) . . ? 
N1 Fe1 S1 86.74(5) 3 . ? 
O1 Fe1 S1 152.95(5) 3 3 ? 
O1 Fe1 S1 91.83(5) . 3 ? 
N1 Fe1 S1 86.74(5) . 3 ? 
N1 Fe1 S1 77.81(5) 3 3 ? 
S1 Fe1 S1 105.47(4) . 3 ? 
O1 Fe1 Cs1 52.02(5) 3 3 ? 
O1 Fe1 Cs1 51.55(5) . 3 ? 
N1 Fe1 Cs1 71.01(5) . 3 ? 
N1 Fe1 Cs1 133.23(5) 3 3 ? 
S1 Fe1 Cs1 103.755(16) . 3 ? 
S1 Fe1 Cs1 138.207(17) 3 3 ? 
C9 S1 Fe1 98.75(8) . . ? 
C1 O1 Fe1 130.03(15) . . ? 
C1 O1 Cs1 98.61(12) . 3 ? 
Fe1 O1 Cs1 98.20(6) . 3 ? 
C1 O1 Cs1 127.18(14) . . ? 
Fe1 O1 Cs1 97.69(6) . . ? 
Cs1 O1 Cs1 94.73(4) 3 . ? 
C2 O2 C3 117.6(2) . . ? 
C2 O2 Cs1 126.61(13) . . ? 
C3 O2 Cs1 115.05(15) . . ? 
C8 N1 N2 112.79(19) . . ? 
C8 N1 Fe1 123.44(15) . . ? 
N2 N1 Fe1 123.32(14) . . ? 
C8 N1 Cs1 91.60(14) . 3 ? 
N2 N1 Cs1 110.48(13) . 3 ? 
Fe1 N1 Cs1 76.17(5) . 3 ? 
C9 N2 N1 114.03(18) . . ? 
C9 N3 H3A 120.0 . . ? 
C9 N3 H3B 120.0 . . ? 
H3A N3 H3B 120.0 . . ? 
N1 C8 C7 126.6(2) . . ? 
N1 C8 H8 116.7 . . ? 
C7 C8 H8 116.7 . . ? 
C1 C7 C6 120.1(2) . . ? 
C1 C7 C8 121.4(2) . . ? 
C6 C7 C8 118.4(2) . . ? 
O1 C1 C7 123.2(2) . . ? 
O1 C1 C2 119.3(2) . . ? 
C7 C1 C2 117.3(2) . . ? 
O1 C1 Cs1 59.74(11) . 3 ? 
C7 C1 Cs1 100.77(13) . 3 ? 
C2 C1 Cs1 106.49(14) . 3 ? 
N2 C9 N3 116.6(2) . . ? 
N2 C9 S1 125.76(17) . . ? 
N3 C9 S1 117.57(18) . . ? 
C5 C6 C7 121.0(2) . . ? 
C5 C6 H6 119.5 . . ? 
C7 C6 H6 119.5 . . ? 
O2 C2 C4 124.7(2) . . ? 
O2 C2 C1 114.5(2) . . ? 
C4 C2 C1 120.9(2) . . ? 
C6 C5 C4 119.6(2) . . ? 
C6 C5 H5 120.2 . . ? 
C4 C5 H5 120.2 . . ? 
C2 C4 C5 120.6(2) . . ? 
C2 C4 H4 119.7 . . ? 
C5 C4 H4 119.7 . . ? 
O2 C3 H3C 109.5 . . ? 
O2 C3 H3D 109.5 . . ? 
H3C C3 H3D 109.5 . . ? 
O2 C3 H3E 109.5 . . ? 
H3C C3 H3E 109.5 . . ? 
H3D C3 H3E 109.5 . . ? 
Cs1 O3 Cs1 96.70(12) . 3 ? 
Cs1 O3 H3F 112.4 . . ? 
Cs1 O3 H3F 112.4 3 . ? 
Cs1 O3 H3G 112.4 . . ? 
Cs1 O3 H3G 112.4 3 . ? 
H3F O3 H3G 110.0 . . ? 
 
_diffrn_measured_fraction_theta_max    0.994 
_diffrn_reflns_theta_full              27.50 
_diffrn_measured_fraction_theta_full   1.000 
_refine_diff_density_max    1.138 
_refine_diff_density_min   -0.715 
_refine_diff_density_rms    0.107 
