# Supplementary material
Source: MDPI journal article supplement (https://www.mdpi.com/2304-6740/5/3/51)
Supplement: s1 [file s1 › inorganics-207671-supplementary/6.cif]

 
data_ld15 
 
_audit_creation_method            SHELXL-97 
_chemical_name_systematic 
; 
 ? 
; 
_chemical_name_common             ? 
_chemical_melting_point           ? 
_chemical_formula_moiety          ? 
_chemical_formula_sum 
 'C16 H16 Cs Fe N8 O8 S2' 
_chemical_formula_weight          701.25 
 
loop_ 
 _atom_type_symbol 
 _atom_type_description 
 _atom_type_scat_dispersion_real 
 _atom_type_scat_dispersion_imag 
 _atom_type_scat_source 
 'C'  'C'   0.0033   0.0016 
 'International Tables Vol C Tables 4.2.6.8 and 6.1.1.4' 
 'N'  'N'   0.0061   0.0033 
 'International Tables Vol C Tables 4.2.6.8 and 6.1.1.4' 
 'O'  'O'   0.0106   0.0060 
 'International Tables Vol C Tables 4.2.6.8 and 6.1.1.4' 
 'S'  'S'   0.1246   0.1234 
 'International Tables Vol C Tables 4.2.6.8 and 6.1.1.4' 
 'Fe'  'Fe'   0.3463   0.8444 
 'International Tables Vol C Tables 4.2.6.8 and 6.1.1.4' 
 'Cs'  'Cs'  -0.3680   2.1192 
 'International Tables Vol C Tables 4.2.6.8 and 6.1.1.4' 
 'H'  'H'   0.0000   0.0000 
 'International Tables Vol C Tables 4.2.6.8 and 6.1.1.4' 
 
_symmetry_cell_setting            'Tetragonal' 
_symmetry_space_group_name_H-M    'P-4n2' 
 
loop_ 
 _symmetry_equiv_pos_as_xyz 
 'x, y, z' 
 'y, -x, -z' 
 '-x, -y, z' 
 '-y, x, -z' 
 'y+1/2, x+1/2, -z+1/2' 
 '-y+1/2, -x+1/2, -z+1/2' 
 '-x+1/2, y+1/2, z+1/2' 
 'x+1/2, -y+1/2, z+1/2' 
 
_cell_length_a                    20.6177(3) 
_cell_length_b                    20.6177(3) 
_cell_length_c                    11.7467(3) 
_cell_angle_alpha                 90.00 
_cell_angle_beta                  90.00 
_cell_angle_gamma                 90.00 
_cell_volume                      4993.40(16) 
_cell_formula_units_Z             8 
_cell_measurement_temperature     123(2) 
_cell_measurement_reflns_used     9897 
_cell_measurement_theta_min       2.21 
_cell_measurement_theta_max       25.76 
 
_exptl_crystal_description        'Block' 
_exptl_crystal_colour             'Black' 
_exptl_crystal_size_max           0.20 
_exptl_crystal_size_mid           0.15 
_exptl_crystal_size_min           0.12 
_exptl_crystal_density_meas       ? 
_exptl_crystal_density_diffrn     1.866 
_exptl_crystal_density_method     'not measured' 
_exptl_crystal_F_000              2760 
_exptl_absorpt_coefficient_mu     2.266 
_exptl_absorpt_correction_type    multi-scan  
_exptl_absorpt_correction_T_min   0.6600 
_exptl_absorpt_correction_T_max   0.7727 
_exptl_absorpt_process_details    'SADABS' 
 
_exptl_special_details 
; 
Although H7A has no H acceptor, but the molecule is definitely H2O not OH- as the Cs+ already balances the charge 
with the anionic Fe molecule.
; 
 
_diffrn_ambient_temperature       123(2) 
_diffrn_radiation_wavelength      0.71073 
_diffrn_radiation_type            MoK\a 
_diffrn_radiation_source          'fine-focus sealed tube' 
_diffrn_radiation_monochromator   graphite 
_diffrn_measurement_device_type   'APEX X8' 
_diffrn_measurement_method        'scans in phi and omega'  
_diffrn_detector_area_resol_mean  ? 
_diffrn_standards_number          ? 
_diffrn_standards_interval_count  ? 
_diffrn_standards_interval_time   ? 
_diffrn_standards_decay_%         ? 
_diffrn_reflns_number             188772 
_diffrn_reflns_av_R_equivalents   0.0651 
_diffrn_reflns_av_sigmaI/netI     0.0298 
_diffrn_reflns_limit_h_min        -32 
_diffrn_reflns_limit_h_max        26 
_diffrn_reflns_limit_k_min        -30 
_diffrn_reflns_limit_k_max        32 
_diffrn_reflns_limit_l_min        -18 
_diffrn_reflns_limit_l_max        18 
_diffrn_reflns_theta_min          1.40 
_diffrn_reflns_theta_max          33.87 
_reflns_number_total              10084 
_reflns_number_gt                 8551 
_reflns_threshold_expression      >2sigma(I) 
 
_computing_data_collection        'Bruker Apex2 V2.0'  
_computing_cell_refinement        'Bruker Apex2 V2.0'  
_computing_data_reduction         'Bruker Apex2 V2.0'  
_computing_structure_solution     'SHELXS-97 (Sheldrick, 1990)' 
_computing_structure_refinement   'SHELXL-97 (Sheldrick, 1997)' 
_computing_molecular_graphics     'X-SEED'  
_computing_publication_material   'XCIF V6.12 (BrukerAXS, 2001).' 
 
_refine_special_details 
; 
 Refinement of F^2^ against ALL reflections.  The weighted R-factor wR and 
 goodness of fit S are based on F^2^, conventional R-factors R are based 
 on F, with F set to zero for negative F^2^. The threshold expression of 
 F^2^ > 2sigma(F^2^) is used only for calculating R-factors(gt) etc. and is 
 not relevant to the choice of reflections for refinement.  R-factors based 
 on F^2^ are statistically about twice as large as those based on F, and R- 
 factors based on ALL data will be even larger. 
; 
 
_refine_ls_structure_factor_coef  Fsqd  
_refine_ls_matrix_type            full 
_refine_ls_weighting_scheme       calc  
_refine_ls_weighting_details 
 'calc w=1/[\s^2^(Fo^2^)+(0.1340P)^2^+33.2354P] where P=(Fo^2^+2Fc^2^)/3' 
_atom_sites_solution_primary      direct 
_atom_sites_solution_secondary    difmap 
_atom_sites_solution_hydrogens    geom 
_refine_ls_hydrogen_treatment     mixed 
_refine_ls_extinction_method      none 
_refine_ls_extinction_coef        ? 
_refine_ls_abs_structure_details 
 'Flack H D (1983), Acta Cryst. A39, 876-881' 
_refine_ls_abs_structure_Flack    -0.01(3) 
_refine_ls_number_reflns          10084 
_refine_ls_number_parameters      331 
_refine_ls_number_restraints      12 
_refine_ls_R_factor_all           0.0913 
_refine_ls_R_factor_gt            0.0747 
_refine_ls_wR_factor_ref          0.2314 
_refine_ls_wR_factor_gt           0.2104 
_refine_ls_goodness_of_fit_ref    1.064 
_refine_ls_restrained_S_all       1.323 
_refine_ls_shift/su_max           0.009 
_refine_ls_shift/su_mean          0.000 
 
loop_ 
 _atom_site_label 
 _atom_site_type_symbol 
 _atom_site_fract_x 
 _atom_site_fract_y 
 _atom_site_fract_z 
 _atom_site_U_iso_or_equiv 
 _atom_site_adp_type 
 _atom_site_occupancy 
 _atom_site_symmetry_multiplicity 
 _atom_site_calc_flag 
 _atom_site_refinement_flags 
 _atom_site_disorder_assembly 
 _atom_site_disorder_group 
Fe1 Fe 0.52527(5) 0.72754(5) 0.88737(8) 0.01636(18) Uani 1 1 d . . . 
S2 S 0.50713(9) 0.74615(10) 0.70244(15) 0.0215(3) Uani 1 1 d . . . 
S1 S 0.43319(9) 0.67290(9) 0.90198(17) 0.0221(3) Uani 1 1 d . . . 
O2 O 0.5464(3) 0.7118(3) 1.0444(5) 0.0243(11) Uani 1 1 d . . . 
C4 C 0.7906(4) 0.7156(4) 0.8933(6) 0.0223(12) Uani 1 1 d . . . 
O1 O 0.6031(3) 0.7782(3) 0.8793(6) 0.0221(10) Uani 1 1 d . . . 
N2 N 0.5294(3) 0.5892(3) 0.8458(6) 0.0200(11) Uani 1 1 d . . . 
O4 O 0.8712(3) 0.6385(3) 0.8812(9) 0.0423(18) Uani 1 1 d . . . 
N1 N 0.5666(3) 0.6451(3) 0.8582(5) 0.0189(10) Uani 1 1 d . . . 
N4 N 0.4829(3) 0.8085(3) 0.9141(5) 0.0183(10) Uani 1 1 d . . . 
C14 C 0.5141(3) 0.8169(3) 1.1132(6) 0.0187(11) Uani 1 1 d . . . 
N6 N 0.4293(4) 0.8403(4) 0.6358(7) 0.0349(19) Uani 1 1 d . . . 
H6A H 0.4051 0.8751 0.6441 0.042 Uiso 1 1 calc R . . 
H6B H 0.4348 0.8232 0.5679 0.042 Uiso 1 1 calc R . . 
O3 O 0.9001(3) 0.7371(4) 0.9131(10) 0.046(2) Uani 1 1 d . . . 
C5 C 0.7418(3) 0.6684(3) 0.8768(6) 0.0194(12) Uani 1 1 d . . . 
H5 H 0.7531 0.6240 0.8686 0.023 Uiso 1 1 calc R . . 
N7 N 0.8566(3) 0.6949(4) 0.8936(8) 0.0305(14) Uani 1 1 d . . . 
C1 C 0.6614(4) 0.7553(3) 0.8851(7) 0.0208(12) Uani 1 1 d . . . 
N5 N 0.4490(3) 0.8397(4) 0.8252(6) 0.0233(12) Uani 1 1 d . . . 
C15 C 0.4840(4) 0.8400(3) 1.0084(6) 0.0194(12) Uani 1 1 d . . . 
H15 H 0.4637 0.8814 1.0101 0.023 Uiso 1 1 calc R . . 
C12 C 0.5398(4) 0.8404(3) 1.3083(6) 0.0185(11) Uani 1 1 d . . . 
C6 C 0.6767(3) 0.6873(3) 0.8726(6) 0.0185(11) Uani 1 1 d . . . 
C13 C 0.5111(3) 0.8584(4) 1.2070(6) 0.0181(11) Uani 1 1 d . . . 
H13 H 0.4893 0.8989 1.2011 0.022 Uiso 1 1 calc R . . 
C9 C 0.5450(4) 0.7550(4) 1.1234(6) 0.0214(12) Uani 1 1 d . . . 
C10 C 0.5753(6) 0.7407(4) 1.2286(7) 0.034(2) Uani 1 1 d . . . 
H10 H 0.5976 0.7007 1.2365 0.041 Uiso 1 1 calc R . . 
C11 C 0.5739(5) 0.7822(4) 1.3196(8) 0.0311(17) Uani 1 1 d . . . 
H11 H 0.5954 0.7717 1.3886 0.037 Uiso 1 1 calc R . . 
C16 C 0.4578(4) 0.8136(4) 0.7260(6) 0.0226(14) Uani 1 1 d . . . 
C7 C 0.6284(4) 0.6368(3) 0.8556(6) 0.0197(12) Uani 1 1 d . . . 
H7 H 0.6438 0.5942 0.8414 0.024 Uiso 1 1 calc R . . 
N3 N 0.4265(3) 0.5469(3) 0.8660(6) 0.0241(12) Uani 1 1 d . . . 
H3A H 0.4411 0.5082 0.8477 0.029 Uiso 1 1 calc R . . 
H3B H 0.3851 0.5524 0.8819 0.029 Uiso 1 1 calc R . . 
C8 C 0.4673(4) 0.5977(4) 0.8698(6) 0.0201(12) Uani 1 1 d . . . 
C2 C 0.7123(4) 0.8000(4) 0.9042(7) 0.0235(14) Uani 1 1 d . . . 
H2 H 0.7021 0.8445 0.9152 0.028 Uiso 1 1 calc R . . 
C3 C 0.7764(4) 0.7808(4) 0.9073(8) 0.0268(15) Uani 1 1 d . . . 
H3 H 0.8101 0.8116 0.9187 0.032 Uiso 1 1 calc R . . 
Cs1 Cs 0.59068(2) 0.90932(2) 1.7500 0.02129(14) Uani 1 2 d S . . 
O7 O 0.8795(10) 0.8501(10) 1.1099(19) 0.115(6) Uani 1 1 d U . . 
H7A H 0.8414 0.8249 1.0839 0.138 Uiso 1 1 calc R . . 
H7B H 0.8945 0.8357 1.1859 0.138 Uiso 1 1 calc R . . 
O8 O 1.0000 1.0000 0.8902(5) 0.0197(13) Uani 1 2 d S . . 
H8A H 1.0376 0.9989 0.8378 0.024 Uiso 0.50 1 calc PR . . 
H8B H 0.9624 1.0011 0.8378 0.024 Uiso 0.50 1 calc PR . . 
O6 O 0.5038(3) 0.9329(3) 1.3964(6) 0.0294(12) Uani 1 1 d . . . 
N8 N 0.5355(3) 0.8826(3) 1.4050(6) 0.0223(11) Uani 1 1 d . . . 
O9 O 0.5000 1.0000 1.8830(12) 0.057(3) Uani 1 2 d S . . 
H9A H 0.5273 1.0273 1.9331 0.068 Uiso 0.50 1 calc PR . . 
H9B H 0.4727 0.9727 1.9331 0.068 Uiso 0.50 1 calc PR . . 
O5 O 0.5622(4) 0.8666(4) 1.4950(5) 0.0361(16) Uani 1 1 d . . . 
Cs2 Cs 0.99623(18) 0.86555(19) 0.9177(3) 0.1102(9) Uani 0.50 1 d PU . . 
 
loop_ 
 _atom_site_aniso_label 
 _atom_site_aniso_U_11 
 _atom_site_aniso_U_22 
 _atom_site_aniso_U_33 
 _atom_site_aniso_U_23 
 _atom_site_aniso_U_13 
 _atom_site_aniso_U_12 
Fe1 0.0181(4) 0.0142(4) 0.0168(4) 0.0024(3) -0.0033(3) 0.0018(3) 
S2 0.0220(8) 0.0242(8) 0.0183(7) 0.0031(6) -0.0018(6) 0.0056(6) 
S1 0.0197(7) 0.0194(7) 0.0271(8) 0.0026(6) 0.0034(6) 0.0011(6) 
O2 0.037(3) 0.017(2) 0.019(2) 0.0023(18) -0.004(2) 0.008(2) 
C4 0.016(3) 0.027(3) 0.024(3) 0.006(3) -0.001(2) 0.001(2) 
O1 0.018(2) 0.014(2) 0.034(3) 0.001(2) -0.008(2) 0.0005(17) 
N2 0.021(3) 0.019(3) 0.021(3) -0.001(2) -0.001(2) 0.001(2) 
O4 0.021(3) 0.028(3) 0.077(6) -0.000(3) 0.009(3) 0.001(2) 
N1 0.019(3) 0.015(2) 0.023(3) -0.0009(19) -0.004(2) 0.0017(19) 
N4 0.016(2) 0.018(2) 0.021(3) 0.0047(19) -0.0022(19) 0.0044(18) 
C14 0.018(3) 0.018(3) 0.021(3) 0.006(2) -0.002(2) 0.002(2) 
N6 0.040(4) 0.044(4) 0.021(3) 0.010(3) 0.001(3) 0.026(4) 
O3 0.020(3) 0.046(4) 0.071(6) 0.003(4) -0.009(3) 0.001(3) 
C5 0.019(3) 0.019(3) 0.020(3) 0.003(2) 0.001(2) 0.004(2) 
N7 0.020(3) 0.036(4) 0.035(4) 0.003(3) 0.001(3) 0.004(3) 
C1 0.023(3) 0.017(3) 0.022(3) 0.003(2) -0.005(2) 0.002(2) 
N5 0.022(3) 0.028(3) 0.020(3) 0.004(2) -0.003(2) 0.009(2) 
C15 0.022(3) 0.015(3) 0.021(3) 0.003(2) -0.003(2) 0.005(2) 
C12 0.023(3) 0.016(3) 0.017(3) 0.001(2) -0.004(2) 0.000(2) 
C6 0.020(3) 0.016(3) 0.019(3) 0.004(2) -0.002(2) 0.005(2) 
C13 0.014(2) 0.018(3) 0.023(3) 0.000(2) 0.000(2) 0.000(2) 
C9 0.029(3) 0.019(3) 0.017(3) 0.002(2) -0.004(2) 0.003(2) 
C10 0.059(6) 0.018(3) 0.025(4) -0.002(3) -0.017(4) 0.015(3) 
C11 0.043(5) 0.025(4) 0.025(3) 0.002(3) -0.011(3) 0.012(3) 
C16 0.019(3) 0.029(3) 0.020(3) 0.007(2) -0.005(2) 0.008(3) 
C7 0.021(3) 0.018(3) 0.020(3) 0.001(2) -0.000(2) -0.000(2) 
N3 0.021(3) 0.019(3) 0.032(3) -0.003(2) 0.000(2) -0.003(2) 
C8 0.022(3) 0.021(3) 0.017(3) 0.002(2) -0.000(2) -0.003(2) 
C2 0.023(3) 0.020(3) 0.027(3) -0.001(2) -0.008(3) 0.001(2) 
C3 0.025(3) 0.023(3) 0.032(4) -0.004(3) -0.006(3) -0.003(3) 
Cs1 0.02139(17) 0.02139(17) 0.0211(2) 0.00203(17) 0.00203(17) 0.00246(19) 
O7 0.115(6) 0.115(6) 0.114(6) -0.0001(13) -0.0002(13) 0.0008(13) 
O8 0.039(4) 0.017(3) 0.003(2) 0.000 0.000 0.000(3) 
O6 0.034(3) 0.023(3) 0.032(3) -0.007(2) -0.001(3) 0.008(2) 
N8 0.022(3) 0.024(3) 0.020(3) -0.000(2) 0.001(2) -0.004(2) 
O9 0.045(7) 0.080(10) 0.045(6) 0.000 0.000 0.036(6) 
O5 0.056(4) 0.033(3) 0.019(3) -0.005(2) -0.006(3) 0.014(3) 
Cs2 0.1053(13) 0.1175(13) 0.1079(13) -0.0591(10) 0.0318(10) -0.0304(10) 
 
_geom_special_details 
; 
 All esds (except the esd in the dihedral angle between two l.s. planes) 
 are estimated using the full covariance matrix.  The cell esds are taken 
 into account individually in the estimation of esds in distances, angles 
 and torsion angles; correlations between esds in cell parameters are only 
 used when they are defined by crystal symmetry.  An approximate (isotropic) 
 treatment of cell esds is used for estimating esds involving l.s. planes. 
; 
 
loop_ 
 _geom_bond_atom_site_label_1 
 _geom_bond_atom_site_label_2 
 _geom_bond_distance 
 _geom_bond_site_symmetry_2 
 _geom_bond_publ_flag 
Fe1 N4 1.911(6) . ? 
Fe1 O1 1.917(6) . ? 
Fe1 O2 1.922(5) . ? 
Fe1 N1 1.931(6) . ? 
Fe1 S1 2.214(2) . ? 
Fe1 S2 2.237(2) . ? 
Fe1 Cs1 4.2976(10) 1_554 ? 
S2 C16 1.746(8) . ? 
S2 Cs1 3.821(2) 1_554 ? 
S2 Cs2 4.067(5) 8_464 ? 
S1 C8 1.743(8) . ? 
O2 C9 1.286(9) . ? 
C4 C3 1.385(11) . ? 
C4 C5 1.413(11) . ? 
C4 N7 1.426(10) . ? 
O1 C1 1.294(9) . ? 
O1 Cs1 3.112(6) 1_554 ? 
N2 C8 1.323(10) . ? 
N2 N1 1.393(9) . ? 
O4 N7 1.211(11) . ? 
N1 C7 1.287(10) . ? 
N4 C15 1.284(10) . ? 
N4 N5 1.411(8) . ? 
N4 Cs1 3.602(6) 1_554 ? 
C14 C13 1.397(10) . ? 
C14 C9 1.431(10) . ? 
C14 C15 1.459(10) . ? 
N6 C16 1.329(9) . ? 
N6 H6A 0.8800 . ? 
N6 H6B 0.8800 . ? 
O3 N7 1.270(11) . ? 
O3 Cs2 3.309(9) . ? 
C5 C6 1.397(10) . ? 
C5 H5 0.9500 . ? 
C1 C2 1.414(10) . ? 
C1 C6 1.444(10) . ? 
C1 Cs1 3.838(7) 1_554 ? 
N5 C16 1.296(10) . ? 
N5 Cs1 3.372(7) 1_554 ? 
C15 H15 0.9500 . ? 
C12 C13 1.380(10) . ? 
C12 C11 1.396(11) . ? 
C12 N8 1.433(10) . ? 
C6 C7 1.455(10) . ? 
C13 H13 0.9500 . ? 
C9 C10 1.416(10) . ? 
C10 C11 1.369(12) . ? 
C10 Cs2 3.521(11) 8_465 ? 
C10 H10 0.9500 . ? 
C11 Cs2 3.630(11) 8_465 ? 
C11 H11 0.9500 . ? 
C16 Cs1 3.389(8) 1_554 ? 
C7 H7 0.9500 . ? 
N3 C8 1.344(10) . ? 
N3 Cs2 3.712(8) 5_446 ? 
N3 H3A 0.8800 . ? 
N3 H3B 0.8800 . ? 
C2 C3 1.380(11) . ? 
C2 Cs1 3.828(7) 1_554 ? 
C2 H2 0.9500 . ? 
C3 H3 0.9500 . ? 
Cs1 O9 3.071(7) 5_458 ? 
Cs1 O9 3.071(7) . ? 
Cs1 O1 3.112(6) 1_556 ? 
Cs1 O1 3.112(6) 6_667 ? 
Cs1 O5 3.178(6) . ? 
Cs1 O5 3.178(6) 6_668 ? 
Cs1 N5 3.372(8) 6_667 ? 
Cs1 N5 3.372(8) 1_556 ? 
Cs1 C16 3.389(8) 6_667 ? 
Cs1 C16 3.389(8) 1_556 ? 
Cs1 N4 3.602(6) 6_667 ? 
Cs1 N4 3.602(6) 1_556 ? 
O7 Cs2 3.20(2) 2_577 ? 
O7 Cs2 3.31(2) . ? 
O7 H7A 0.9900 . ? 
O7 H7B 0.9900 . ? 
O8 Cs2 2.792(4) 3_775 ? 
O8 Cs2 2.792(4) . ? 
O8 Cs2 3.575(5) 4_757 ? 
O8 Cs2 3.575(5) 2_577 ? 
O8 H8A 0.9900 . ? 
O8 H8B 0.9900 . ? 
O6 N8 1.229(9) . ? 
N8 O5 1.237(9) . ? 
O9 Cs1 3.071(7) 3_675 ? 
O9 H9A 0.9900 . ? 
O9 H9B 0.9900 . ? 
Cs2 O7 3.20(2) 4_757 ? 
Cs2 C10 3.521(11) 8_564 ? 
Cs2 O8 3.575(5) 2_577 ? 
Cs2 C11 3.630(11) 8_564 ? 
Cs2 N3 3.712(8) 5_556 ? 
Cs2 S2 4.067(5) 8_565 ? 
Cs2 Cs2 4.372(4) 2_577 ? 
Cs2 Cs2 4.372(4) 4_757 ? 
Cs2 Cs2 5.546(8) 3_775 ? 
 
loop_ 
 _geom_angle_atom_site_label_1 
 _geom_angle_atom_site_label_2 
 _geom_angle_atom_site_label_3 
 _geom_angle 
 _geom_angle_site_symmetry_1 
 _geom_angle_site_symmetry_3 
 _geom_angle_publ_flag 
N4 Fe1 O1 85.1(2) . . ? 
N4 Fe1 O2 95.3(3) . . ? 
O1 Fe1 O2 87.1(3) . . ? 
N4 Fe1 N1 178.7(3) . . ? 
O1 Fe1 N1 95.8(3) . . ? 
O2 Fe1 N1 85.5(3) . . ? 
N4 Fe1 S1 92.3(2) . . ? 
O1 Fe1 S1 177.1(2) . . ? 
O2 Fe1 S1 91.9(2) . . ? 
N1 Fe1 S1 86.8(2) . . ? 
N4 Fe1 S2 86.17(19) . . ? 
O1 Fe1 S2 89.9(2) . . ? 
O2 Fe1 S2 176.6(2) . . ? 
N1 Fe1 S2 93.0(2) . . ? 
S1 Fe1 S2 91.10(8) . . ? 
N4 Fe1 Cs1 56.17(19) . 1_554 ? 
O1 Fe1 Cs1 40.87(16) . 1_554 ? 
O2 Fe1 Cs1 115.87(19) . 1_554 ? 
N1 Fe1 Cs1 124.2(2) . 1_554 ? 
S1 Fe1 Cs1 137.89(6) . 1_554 ? 
S2 Fe1 Cs1 62.51(6) . 1_554 ? 
C16 S2 Fe1 94.6(2) . . ? 
C16 S2 Cs1 62.5(3) . 1_554 ? 
Fe1 S2 Cs1 86.20(6) . 1_554 ? 
C16 S2 Cs2 123.3(3) . 8_464 ? 
Fe1 S2 Cs2 135.28(9) . 8_464 ? 
Cs1 S2 Cs2 130.07(7) 1_554 8_464 ? 
C8 S1 Fe1 95.2(3) . . ? 
C9 O2 Fe1 124.8(5) . . ? 
C3 C4 C5 122.3(7) . . ? 
C3 C4 N7 119.4(8) . . ? 
C5 C4 N7 118.3(7) . . ? 
C1 O1 Fe1 125.3(5) . . ? 
C1 O1 Cs1 114.8(5) . 1_554 ? 
Fe1 O1 Cs1 115.4(2) . 1_554 ? 
C8 N2 N1 113.7(6) . . ? 
C7 N1 N2 115.7(6) . . ? 
C7 N1 Fe1 124.0(5) . . ? 
N2 N1 Fe1 120.3(5) . . ? 
C15 N4 N5 114.7(6) . . ? 
C15 N4 Fe1 125.1(5) . . ? 
N5 N4 Fe1 120.2(5) . . ? 
C15 N4 Cs1 99.1(5) . 1_554 ? 
N5 N4 Cs1 69.3(4) . 1_554 ? 
Fe1 N4 Cs1 97.7(2) . 1_554 ? 
C13 C14 C9 120.1(6) . . ? 
C13 C14 C15 116.5(6) . . ? 
C9 C14 C15 123.4(7) . . ? 
C16 N6 H6A 120.0 . . ? 
C16 N6 H6B 120.0 . . ? 
H6A N6 H6B 120.0 . . ? 
N7 O3 Cs2 166.9(7) . . ? 
C6 C5 C4 119.7(6) . . ? 
C6 C5 H5 120.1 . . ? 
C4 C5 H5 120.1 . . ? 
O4 N7 O3 120.2(8) . . ? 
O4 N7 C4 121.7(8) . . ? 
O3 N7 C4 118.0(8) . . ? 
O1 C1 C2 117.4(6) . . ? 
O1 C1 C6 123.5(7) . . ? 
C2 C1 C6 119.1(7) . . ? 
O1 C1 Cs1 47.4(4) . 1_554 ? 
C2 C1 Cs1 79.0(4) . 1_554 ? 
C6 C1 Cs1 147.6(5) . 1_554 ? 
C16 N5 N4 114.0(6) . . ? 
C16 N5 Cs1 79.7(5) . 1_554 ? 
N4 N5 Cs1 87.7(4) . 1_554 ? 
N4 C15 C14 124.8(6) . . ? 
N4 C15 H15 117.6 . . ? 
C14 C15 H15 117.6 . . ? 
C13 C12 C11 121.9(7) . . ? 
C13 C12 N8 119.6(6) . . ? 
C11 C12 N8 118.5(7) . . ? 
C5 C6 C1 118.5(7) . . ? 
C5 C6 C7 117.5(6) . . ? 
C1 C6 C7 124.0(6) . . ? 
C12 C13 C14 119.7(6) . . ? 
C12 C13 H13 120.1 . . ? 
C14 C13 H13 120.1 . . ? 
O2 C9 C10 118.4(7) . . ? 
O2 C9 C14 124.5(7) . . ? 
C10 C9 C14 117.0(7) . . ? 
C11 C10 C9 122.8(7) . . ? 
C11 C10 Cs2 83.5(6) . 8_465 ? 
C9 C10 Cs2 118.4(7) . 8_465 ? 
C11 C10 H10 118.6 . . ? 
C9 C10 H10 118.6 . . ? 
Cs2 C10 H10 67.8 8_465 . ? 
C10 C11 C12 118.3(7) . . ? 
C10 C11 Cs2 74.5(6) . 8_465 ? 
C12 C11 Cs2 122.0(7) . 8_465 ? 
C10 C11 H11 120.8 . . ? 
C12 C11 H11 120.8 . . ? 
Cs2 C11 H11 75.1 8_465 . ? 
N5 C16 N6 118.9(7) . . ? 
N5 C16 S2 123.7(5) . . ? 
N6 C16 S2 117.4(6) . . ? 
N5 C16 Cs1 78.2(5) . 1_554 ? 
N6 C16 Cs1 100.5(6) . 1_554 ? 
S2 C16 Cs1 90.3(3) . 1_554 ? 
N1 C7 C6 125.4(7) . . ? 
N1 C7 H7 117.3 . . ? 
C6 C7 H7 117.3 . . ? 
C8 N3 Cs2 117.4(5) . 5_446 ? 
C8 N3 H3A 120.0 . . ? 
Cs2 N3 H3A 68.9 5_446 . ? 
C8 N3 H3B 120.0 . . ? 
Cs2 N3 H3B 84.2 5_446 . ? 
H3A N3 H3B 120.0 . . ? 
N2 C8 N3 119.7(7) . . ? 
N2 C8 S1 123.7(6) . . ? 
N3 C8 S1 116.6(6) . . ? 
C3 C2 C1 121.8(7) . . ? 
C3 C2 Cs1 144.0(6) . 1_554 ? 
C1 C2 Cs1 79.8(4) . 1_554 ? 
C3 C2 H2 119.1 . . ? 
C1 C2 H2 119.1 . . ? 
Cs1 C2 H2 49.5 1_554 . ? 
C2 C3 C4 118.5(7) . . ? 
C2 C3 H3 120.8 . . ? 
C4 C3 H3 120.8 . . ? 
O9 Cs1 O9 61.2(4) 5_458 . ? 
O9 Cs1 O1 145.84(11) 5_458 1_556 ? 
O9 Cs1 O1 109.3(2) . 1_556 ? 
O9 Cs1 O1 109.3(2) 5_458 6_667 ? 
O9 Cs1 O1 145.84(11) . 6_667 ? 
O1 Cs1 O1 95.5(2) 1_556 6_667 ? 
O9 Cs1 O5 65.0(2) 5_458 . ? 
O9 Cs1 O5 122.4(2) . . ? 
O1 Cs1 O5 103.55(18) 1_556 . ? 
O1 Cs1 O5 71.2(2) 6_667 . ? 
O9 Cs1 O5 122.4(2) 5_458 6_668 ? 
O9 Cs1 O5 65.0(2) . 6_668 ? 
O1 Cs1 O5 71.2(2) 1_556 6_668 ? 
O1 Cs1 O5 103.55(18) 6_667 6_668 ? 
O5 Cs1 O5 172.5(3) . 6_668 ? 
O9 Cs1 N5 66.33(13) 5_458 6_667 ? 
O9 Cs1 N5 82.24(14) . 6_667 ? 
O1 Cs1 N5 147.71(16) 1_556 6_667 ? 
O1 Cs1 N5 64.77(15) 6_667 6_667 ? 
O5 Cs1 N5 94.13(19) . 6_667 ? 
O5 Cs1 N5 88.2(2) 6_668 6_667 ? 
O9 Cs1 N5 82.24(14) 5_458 1_556 ? 
O9 Cs1 N5 66.33(13) . 1_556 ? 
O1 Cs1 N5 64.77(15) 1_556 1_556 ? 
O1 Cs1 N5 147.71(16) 6_667 1_556 ? 
O5 Cs1 N5 88.2(2) . 1_556 ? 
O5 Cs1 N5 94.1(2) 6_668 1_556 ? 
N5 Cs1 N5 143.7(2) 6_667 1_556 ? 
O9 Cs1 C16 84.52(14) 5_458 6_667 ? 
O9 Cs1 C16 79.62(12) . 6_667 ? 
O1 Cs1 C16 127.88(17) 1_556 6_667 ? 
O1 Cs1 C16 66.51(15) 6_667 6_667 ? 
O5 Cs1 C16 114.2(2) . 6_667 ? 
O5 Cs1 C16 67.1(2) 6_668 6_667 ? 
N5 Cs1 C16 22.10(18) 6_667 6_667 ? 
N5 Cs1 C16 145.77(17) 1_556 6_667 ? 
O9 Cs1 C16 79.62(12) 5_458 1_556 ? 
O9 Cs1 C16 84.52(14) . 1_556 ? 
O1 Cs1 C16 66.51(15) 1_556 1_556 ? 
O1 Cs1 C16 127.88(17) 6_667 1_556 ? 
O5 Cs1 C16 67.1(2) . 1_556 ? 
O5 Cs1 C16 114.2(2) 6_668 1_556 ? 
N5 Cs1 C16 145.76(17) 6_667 1_556 ? 
N5 Cs1 C16 22.10(18) 1_556 1_556 ? 
C16 Cs1 C16 161.6(3) 6_667 1_556 ? 
O9 Cs1 N4 72.74(15) 5_458 6_667 ? 
O9 Cs1 N4 104.34(14) . 6_667 ? 
O1 Cs1 N4 138.58(15) 1_556 6_667 ? 
O1 Cs1 N4 44.63(14) 6_667 6_667 ? 
O5 Cs1 N4 76.90(19) . 6_667 ? 
O5 Cs1 N4 103.32(19) 6_668 6_667 ? 
N5 Cs1 N4 23.04(14) 6_667 6_667 ? 
N5 Cs1 N4 154.49(15) 1_556 6_667 ? 
C16 Cs1 N4 37.77(15) 6_667 6_667 ? 
C16 Cs1 N4 141.39(16) 1_556 6_667 ? 
O9 Cs1 N4 104.34(14) 5_458 1_556 ? 
O9 Cs1 N4 72.74(15) . 1_556 ? 
O1 Cs1 N4 44.63(14) 1_556 1_556 ? 
O1 Cs1 N4 138.58(14) 6_667 1_556 ? 
O5 Cs1 N4 103.32(19) . 1_556 ? 
O5 Cs1 N4 76.90(19) 6_668 1_556 ? 
N5 Cs1 N4 154.49(15) 6_667 1_556 ? 
N5 Cs1 N4 23.04(14) 1_556 1_556 ? 
C16 Cs1 N4 141.39(16) 6_667 1_556 ? 
C16 Cs1 N4 37.77(15) 1_556 1_556 ? 
N4 Cs1 N4 176.74(19) 6_667 1_556 ? 
Cs2 O7 Cs2 84.3(5) 2_577 . ? 
Cs2 O7 H7A 114.6 2_577 . ? 
Cs2 O7 H7A 114.6 . . ? 
Cs2 O7 H7B 114.6 2_577 . ? 
Cs2 O7 H7B 114.6 . . ? 
H7A O7 H7B 111.7 . . ? 
Cs2 O8 Cs2 166.7(3) 3_775 . ? 
Cs2 O8 Cs2 85.81(10) 3_775 4_757 ? 
Cs2 O8 Cs2 85.81(10) . 4_757 ? 
Cs2 O8 Cs2 85.81(10) 3_775 2_577 ? 
Cs2 O8 Cs2 85.80(10) . 2_577 ? 
Cs2 O8 Cs2 101.7(2) 4_757 2_577 ? 
Cs2 O8 H8A 94.1 3_775 . ? 
Cs2 O8 H8A 94.1 . . ? 
Cs2 O8 H8A 77.6 4_757 . ? 
Cs2 O8 H8A 179.3 2_577 . ? 
Cs2 O8 H8B 94.1 3_775 . ? 
Cs2 O8 H8B 94.1 . . ? 
Cs2 O8 H8B 179.3 4_757 . ? 
Cs2 O8 H8B 77.6 2_577 . ? 
H8A O8 H8B 103.1 . . ? 
O6 N8 O5 122.2(7) . . ? 
O6 N8 C12 118.6(7) . . ? 
O5 N8 C12 119.2(7) . . ? 
Cs1 O9 Cs1 118.8(4) . 3_675 ? 
Cs1 O9 H9A 107.6 . . ? 
Cs1 O9 H9A 107.6 3_675 . ? 
Cs1 O9 H9B 107.6 . . ? 
Cs1 O9 H9B 107.6 3_675 . ? 
H9A O9 H9B 107.0 . . ? 
N8 O5 Cs1 144.5(5) . . ? 
O8 Cs2 O7 82.6(4) . 4_757 ? 
O8 Cs2 O3 144.1(2) . . ? 
O7 Cs2 O3 131.6(4) 4_757 . ? 
O8 Cs2 O7 101.2(4) . . ? 
O7 Cs2 O7 142.8(3) 4_757 . ? 
O3 Cs2 O7 59.9(4) . . ? 
O8 Cs2 C10 122.1(2) . 8_564 ? 
O7 Cs2 C10 62.2(4) 4_757 8_564 ? 
O3 Cs2 C10 76.6(2) . 8_564 ? 
O7 Cs2 C10 134.9(4) . 8_564 ? 
O8 Cs2 O8 45.8(2) . 2_577 ? 
O7 Cs2 O8 88.4(4) 4_757 2_577 ? 
O3 Cs2 O8 130.1(2) . 2_577 ? 
O7 Cs2 O8 70.2(4) . 2_577 ? 
C10 Cs2 O8 150.55(19) 8_564 2_577 ? 
O8 Cs2 C11 141.7(2) . 8_564 ? 
O7 Cs2 C11 66.8(4) 4_757 8_564 ? 
O3 Cs2 C11 65.6(2) . 8_564 ? 
O7 Cs2 C11 117.1(4) . 8_564 ? 
C10 Cs2 C11 22.0(2) 8_564 8_564 ? 
O8 Cs2 C11 147.3(2) 2_577 8_564 ? 
O8 Cs2 N3 63.40(19) . 5_556 ? 
O7 Cs2 N3 66.4(4) 4_757 5_556 ? 
O3 Cs2 N3 115.1(2) . 5_556 ? 
O7 Cs2 N3 148.1(4) . 5_556 ? 
C10 Cs2 N3 60.90(18) 8_564 5_556 ? 
O8 Cs2 N3 107.36(17) 2_577 5_556 ? 
C11 Cs2 N3 82.8(2) 8_564 5_556 ? 
O8 Cs2 S2 131.00(16) . 8_565 ? 
O7 Cs2 S2 94.6(4) 4_757 8_565 ? 
O3 Cs2 S2 66.0(2) . 8_565 ? 
O7 Cs2 S2 54.9(4) . 8_565 ? 
C10 Cs2 S2 98.09(17) 8_564 8_565 ? 
O8 Cs2 S2 85.35(11) 2_577 8_565 ? 
C11 Cs2 S2 76.20(17) 8_564 8_565 ? 
N3 Cs2 S2 156.12(16) 5_556 8_565 ? 
O8 Cs2 Cs2 54.64(8) . 2_577 ? 
O7 Cs2 Cs2 126.6(4) 4_757 2_577 ? 
O3 Cs2 Cs2 99.2(2) . 2_577 ? 
O7 Cs2 Cs2 46.7(4) . 2_577 ? 
C10 Cs2 Cs2 165.9(2) 8_564 2_577 ? 
O8 Cs2 Cs2 39.56(5) 2_577 2_577 ? 
C11 Cs2 Cs2 163.6(2) 8_564 2_577 ? 
N3 Cs2 Cs2 110.48(17) 5_556 2_577 ? 
S2 Cs2 Cs2 92.27(11) 8_565 2_577 ? 
O8 Cs2 Cs2 54.64(8) . 4_757 ? 
O7 Cs2 Cs2 49.0(4) 4_757 4_757 ? 
O3 Cs2 Cs2 153.0(3) . 4_757 ? 
O7 Cs2 Cs2 103.4(4) . 4_757 ? 
C10 Cs2 Cs2 111.14(19) 8_564 4_757 ? 
O8 Cs2 Cs2 39.56(5) 2_577 4_757 ? 
C11 Cs2 Cs2 111.74(18) 8_564 4_757 ? 
N3 Cs2 Cs2 90.28(15) 5_556 4_757 ? 
S2 Cs2 Cs2 87.10(14) 8_565 4_757 ? 
Cs2 Cs2 Cs2 78.73(9) 2_577 4_757 ? 
O8 Cs2 Cs2 6.66(15) . 3_775 ? 
O7 Cs2 Cs2 83.2(4) 4_757 3_775 ? 
O3 Cs2 Cs2 144.8(2) . 3_775 ? 
O7 Cs2 Cs2 96.7(4) . 3_775 ? 
C10 Cs2 Cs2 127.53(16) 8_564 3_775 ? 
O8 Cs2 Cs2 39.13(11) 2_577 3_775 ? 
C11 Cs2 Cs2 145.77(19) 8_564 3_775 ? 
N3 Cs2 Cs2 69.76(12) 5_556 3_775 ? 
S2 Cs2 Cs2 124.37(5) 8_565 3_775 ? 
Cs2 Cs2 Cs2 50.63(5) 2_577 3_775 ? 
Cs2 Cs2 Cs2 50.63(5) 4_757 3_775 ? 
 
_diffrn_measured_fraction_theta_max    0.999 
_diffrn_reflns_theta_full              27.50 
_diffrn_measured_fraction_theta_full   0.999 
_refine_diff_density_max    4.049 
_refine_diff_density_min   -4.962 
_refine_diff_density_rms    0.282 
